# Supplementary material for: Metabolomics Reveals the Heterogeneous Secretome of Two Entomopathogenic Fungi to Ex Vivo Cultured Insect Tissues
Source: PubMed Central journal article supplement (PMC3734240; doi:10.1371/journal.pone.0070609), 2013-08-05

# Beauverolides

Product ion mass spectra of the 20 beauverolides found in this study in the order as described in Table 1



Spectrum from DataSET3001.wiff (sample 1) - T FBS Beauveria muscle, Experiment 2, +TOF MS<sup>2</sup> of 488.3 (50 - 850) from 13.506 to 13.554 min, Gaussian smoothed

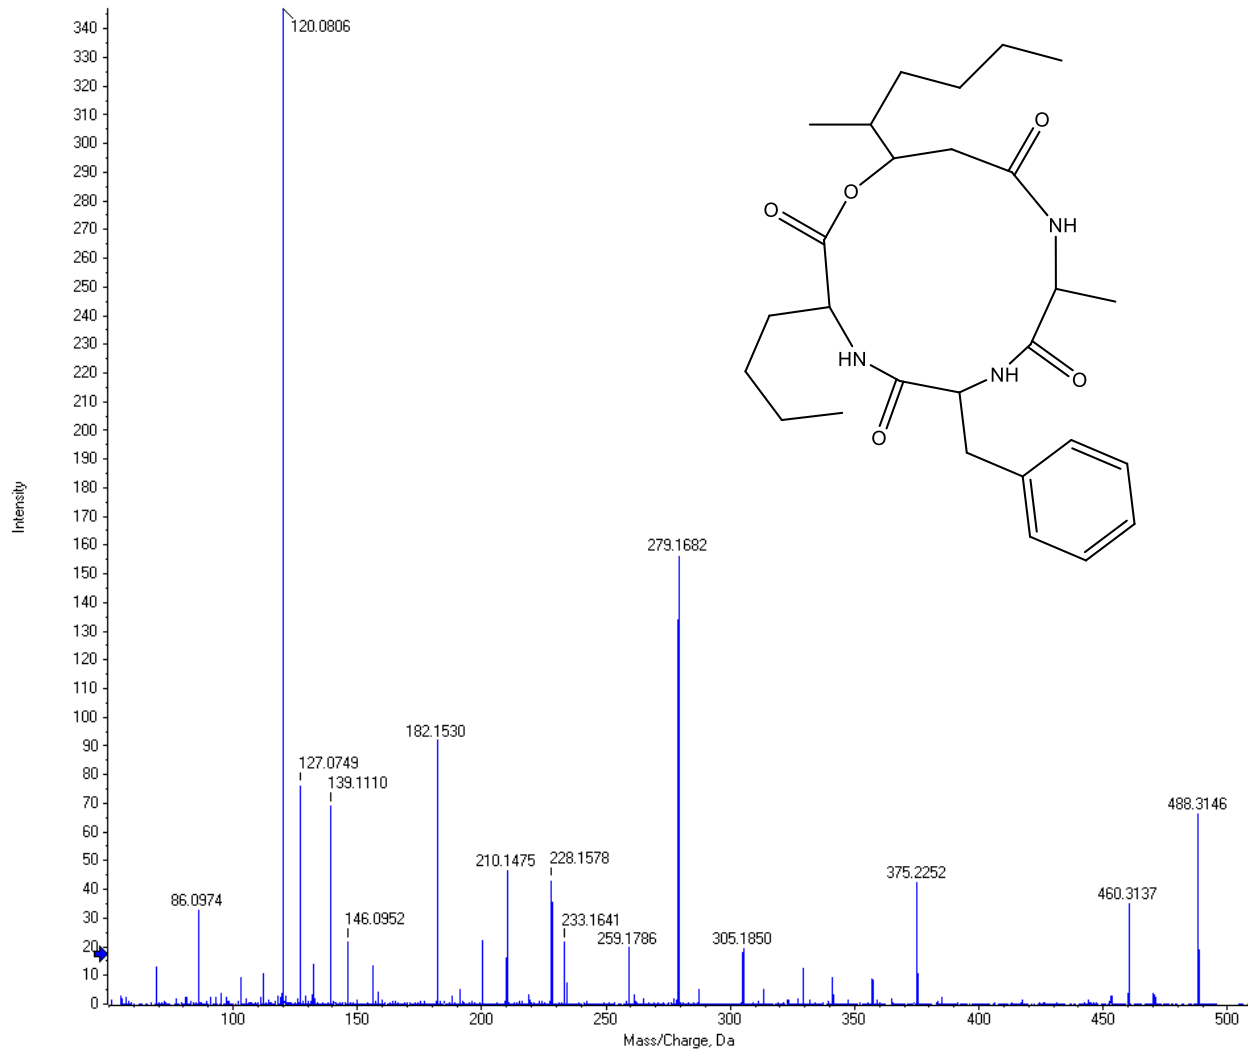

Spectrum from DatasetSET1207.wiff (sample 1) - T FBS PSK Beauveria muscle (3), Experiment 3, +TOF MS<sup>2</sup> (50 - 1250) from 13.611 min  
Precursor: 500.3 Da, CE: 30.0  
With 1 other merged spectrum, Gaussian smoothed

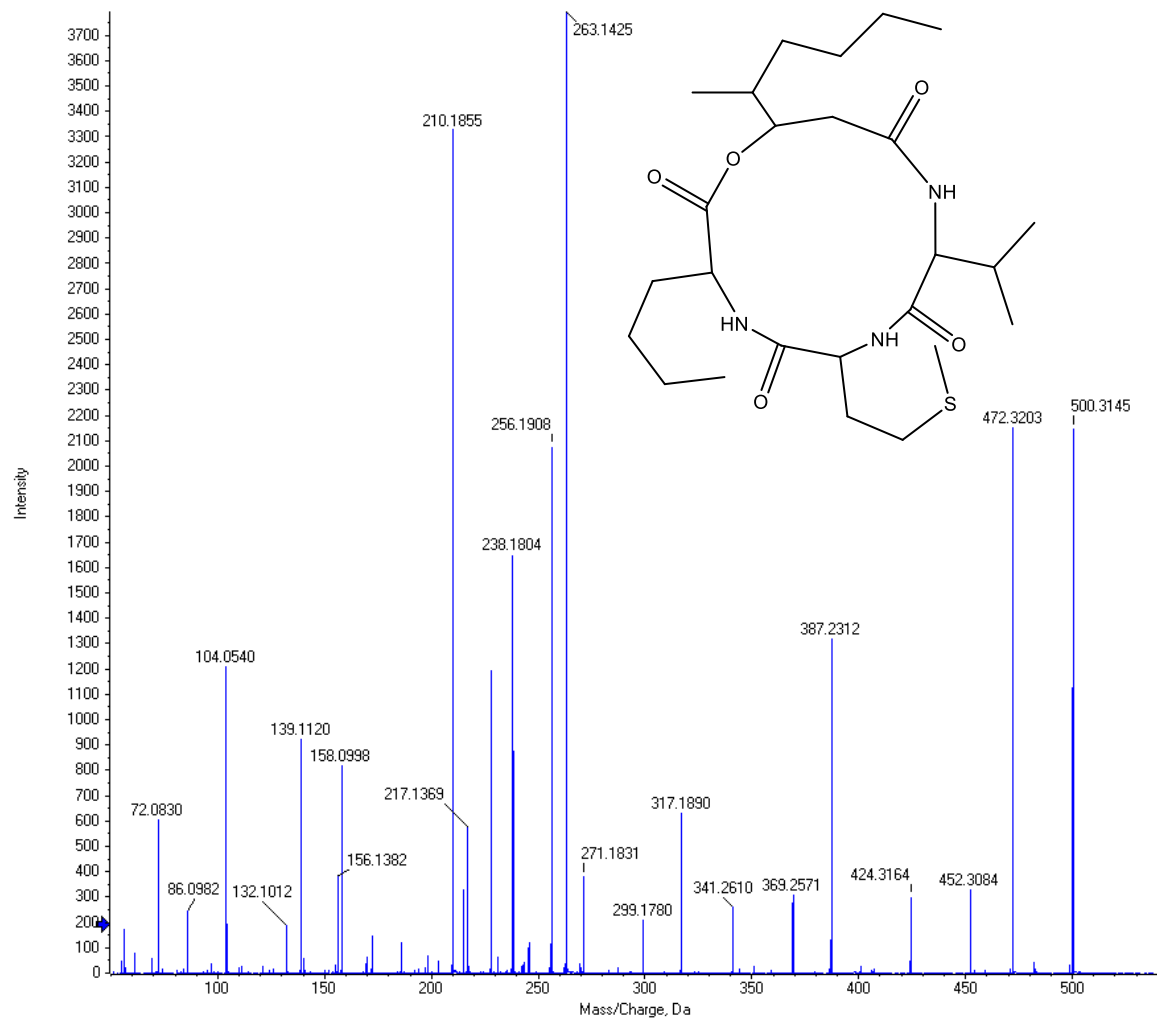

Spectrum from DataSET3001.wiff (sample 1) - T FBS Beauveria muscle, Experiment 6, +TDF MS<sup>2</sup> of 510.3 (50 - 850) from 14.981 to 15.078 min, Gaussian smoothed

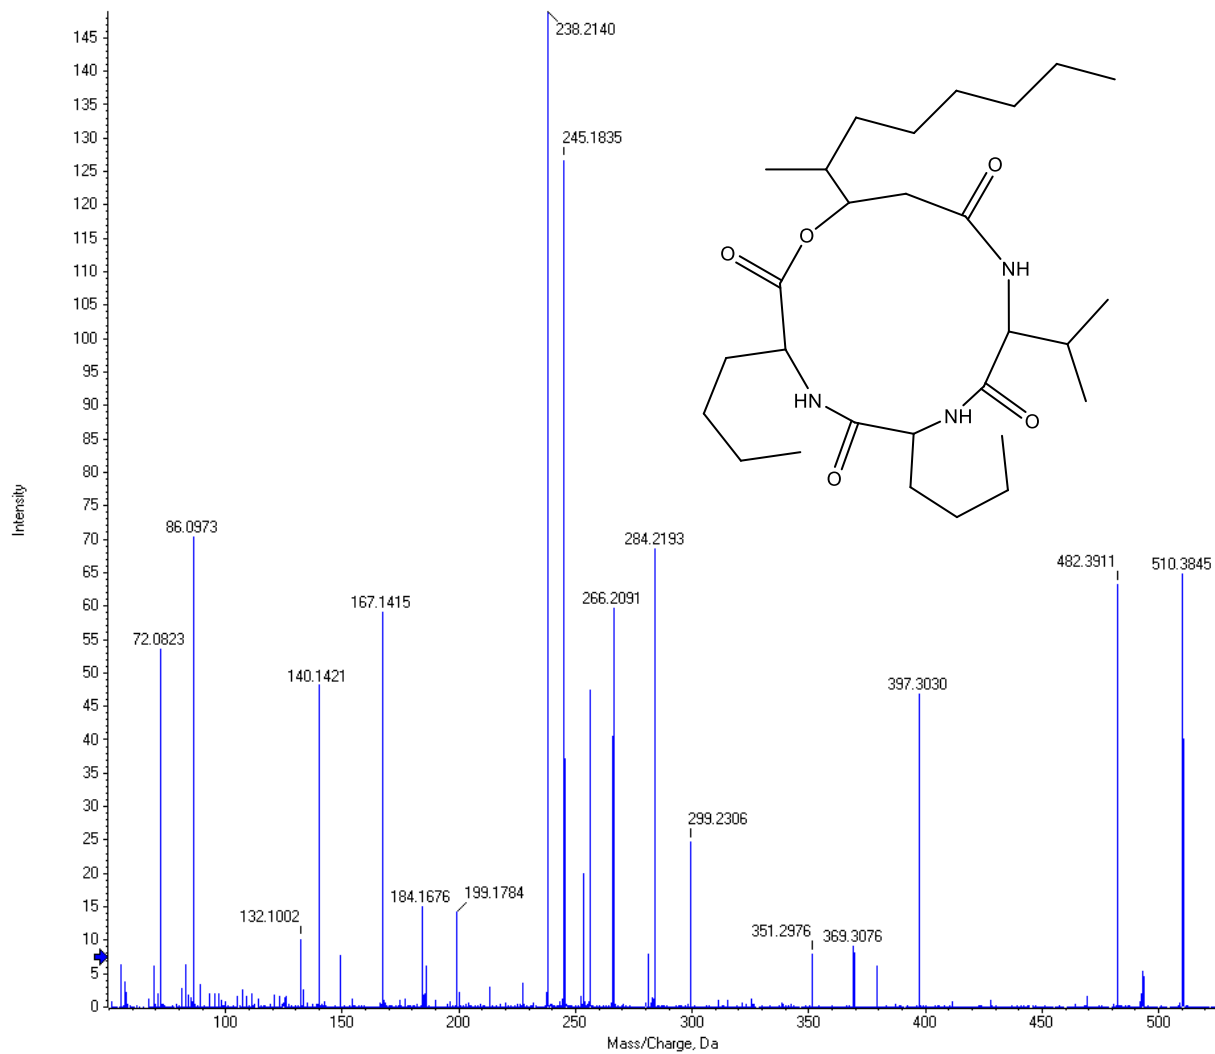

Spectrum from DatasetSET1153.wiff (sample 1) - FBS PSK Beauveria (2), Experiment 2, +TOF MS<sup>2</sup> (50 - 1250) from 13.938 min  
Precursor: 514.3 Da, CE: 30.0, Gaussian smoothed

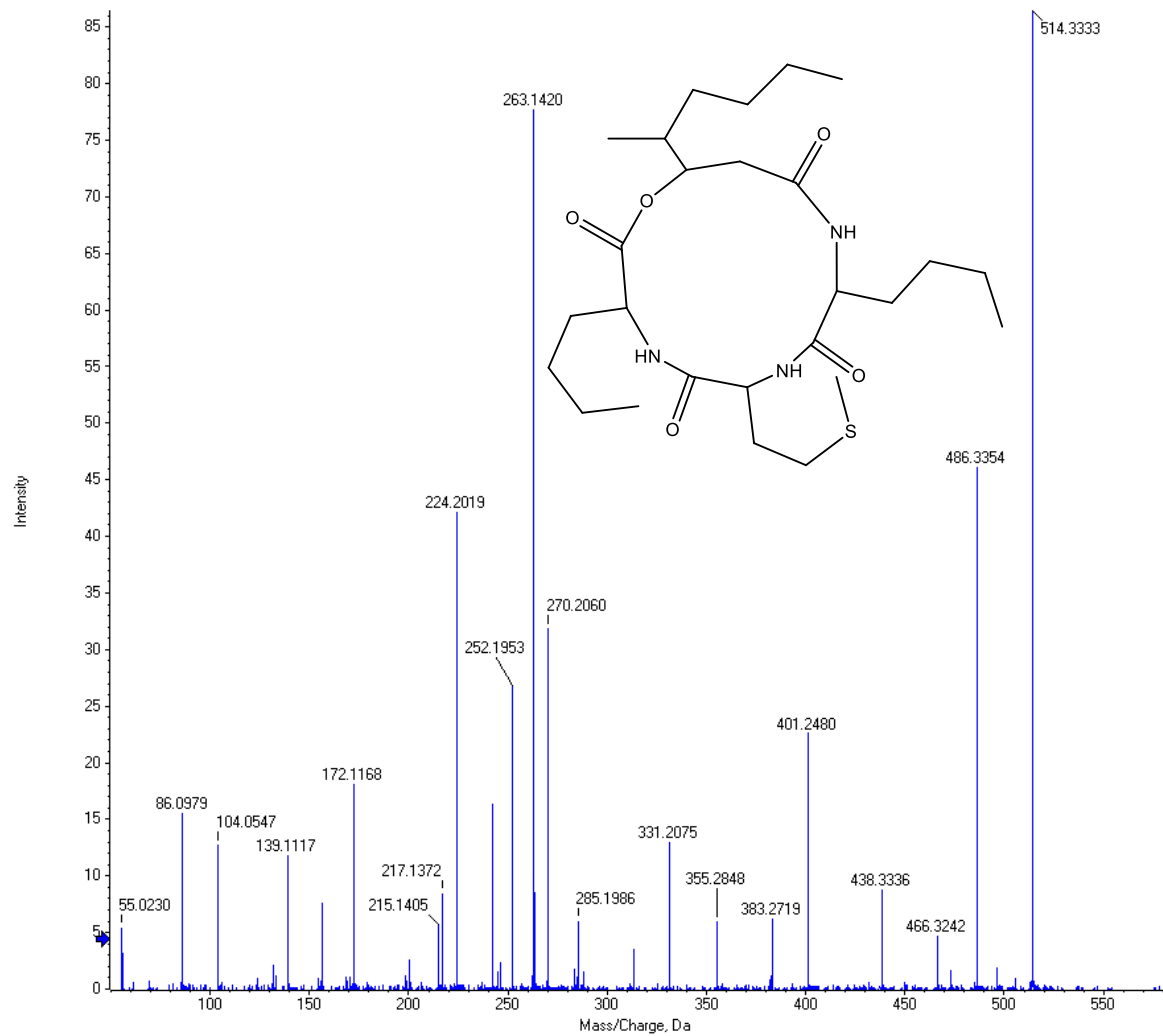

Spectrum from DatasetSET1196.wiff (sample 1) - T FBS PSK Beauveria (1), Experiment 2, +TOF MS<sup>2</sup> (50 - 1250) from 14.027 min  
Precursor: 516.3 Da, CE: 30.0  
With 1 other merged spectrum, Gaussian smoothed

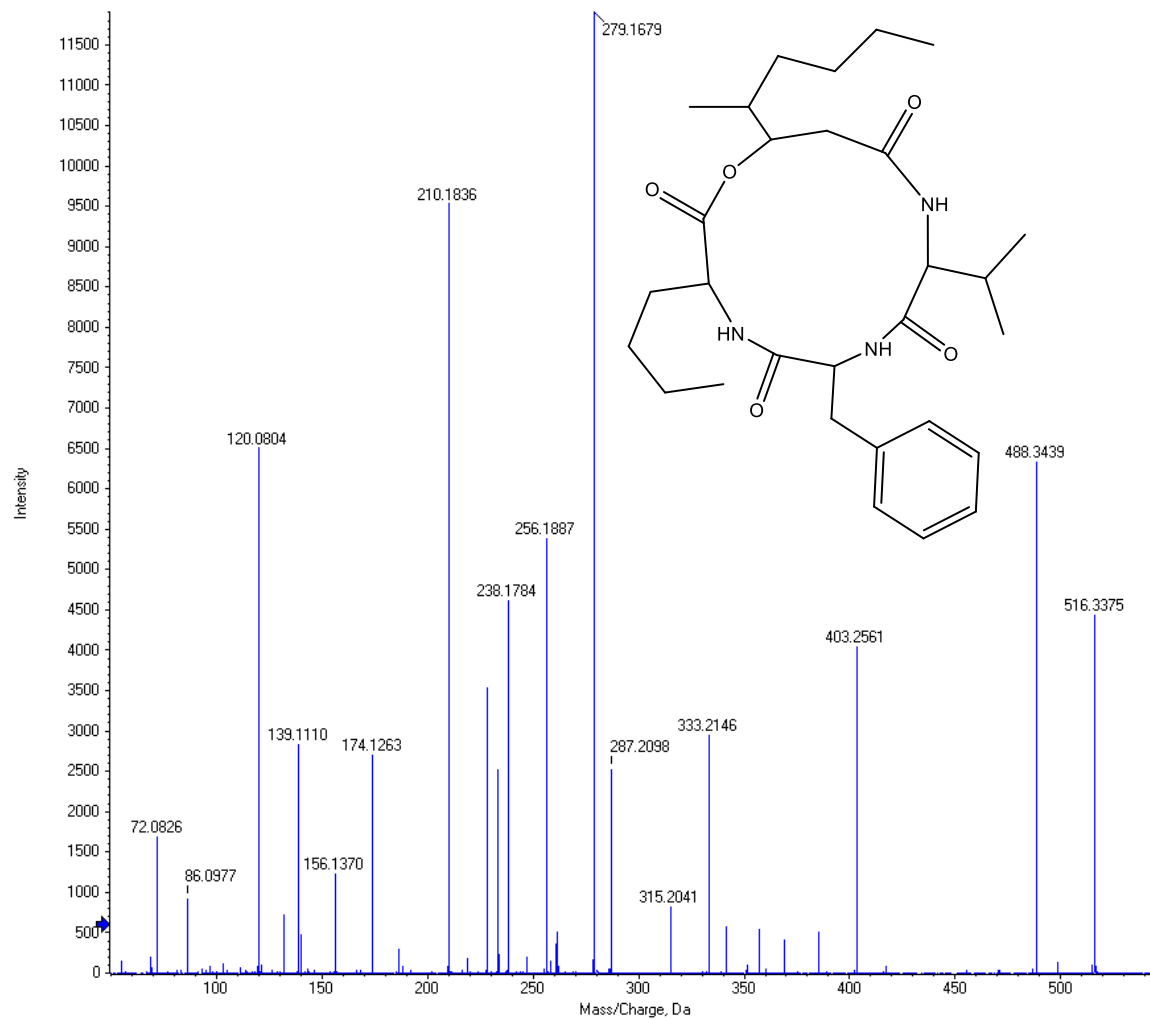

Spectrum from DatasetSET1196.wiff (sample 1) - T FBS PSK Beauveria (1), Experiment 5, +TOF MS<sup>2</sup> (50 - 1250) from 14.465 min  
Precursor: 528.3 Da, CE: 30.0  
With 1 other merged spectrum, Gaussian smoothed

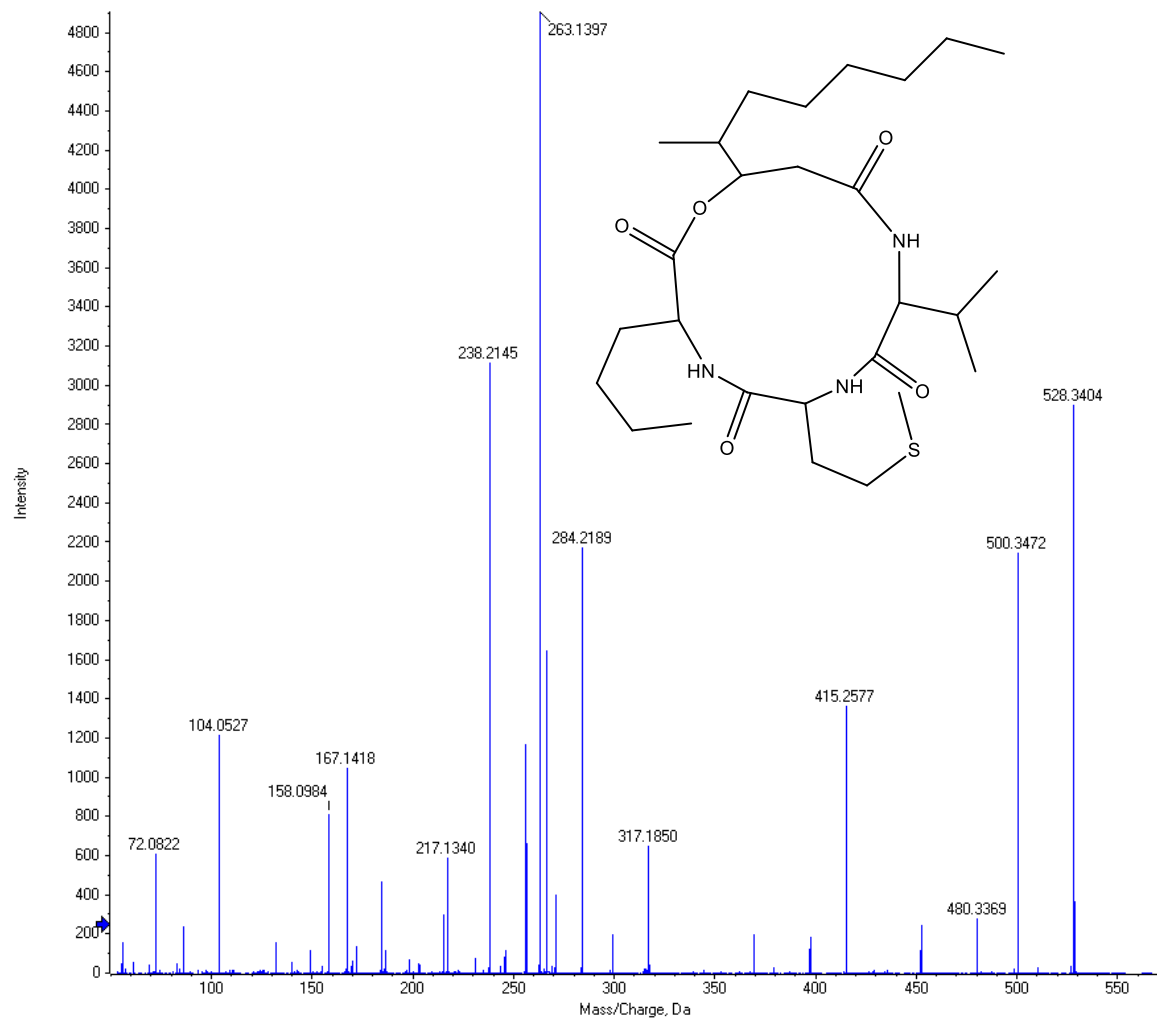



Spectrum from DatasetSET1196.wiff (sample 1) - T FBS PSK Beauveria (1), Experiment 5, +TOF MS<sup>2</sup> (50 - 1250) from 14.281 min  
Precursor: 530.4 Da, CE: 30.0  
With 1 other merged spectrum, Gaussian smoothed

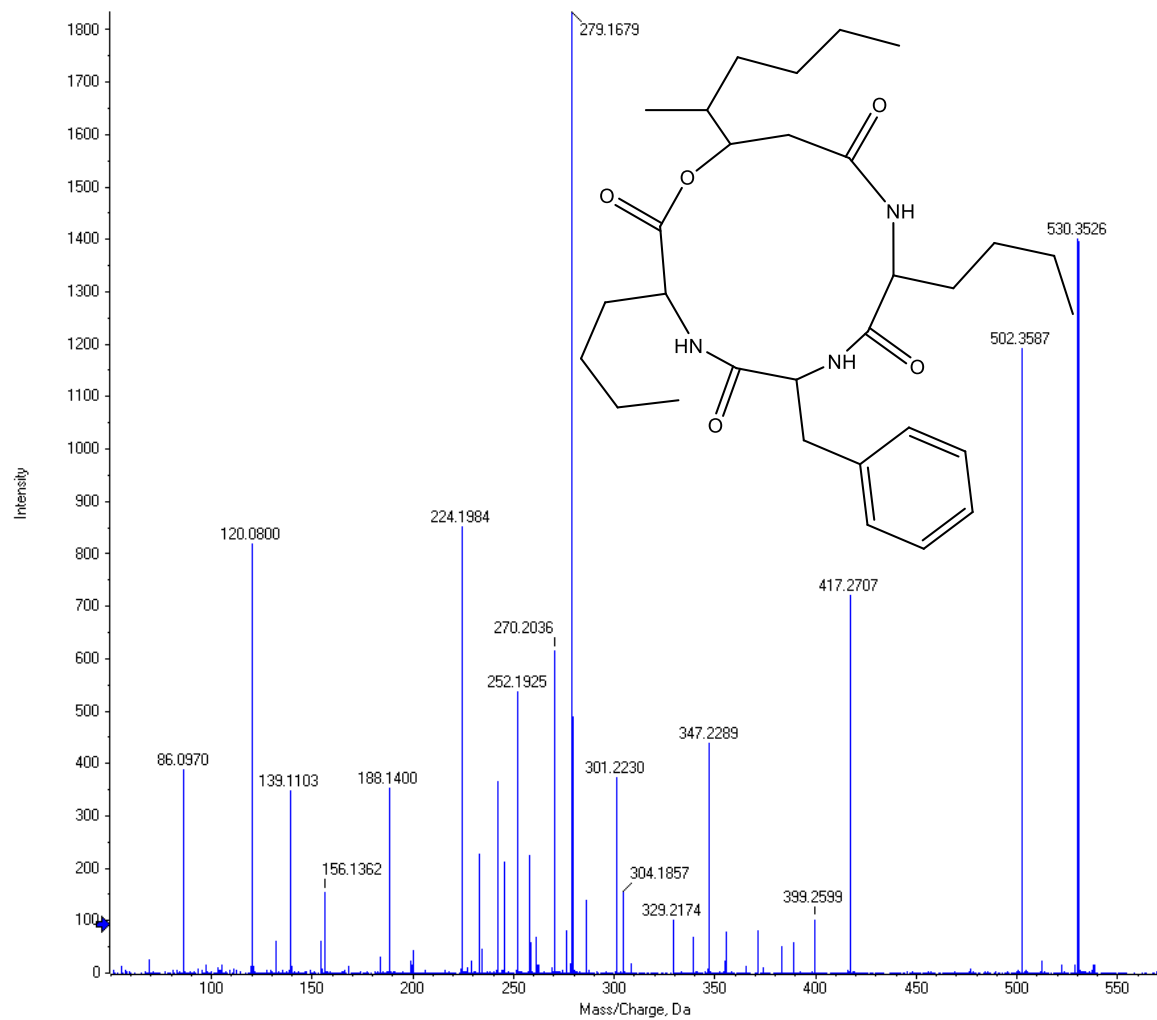

Spectrum from DatasetSET1196.wiff (sample 1) - T FBS PSK Beauveria (1), Experiment 5, +TOF MS<sup>2</sup> (50 - 1250) from 13.471 min  
Precursor: 532.3 Da, CE: 30.0  
With 1 other merged spectrum, Gaussian smoothed

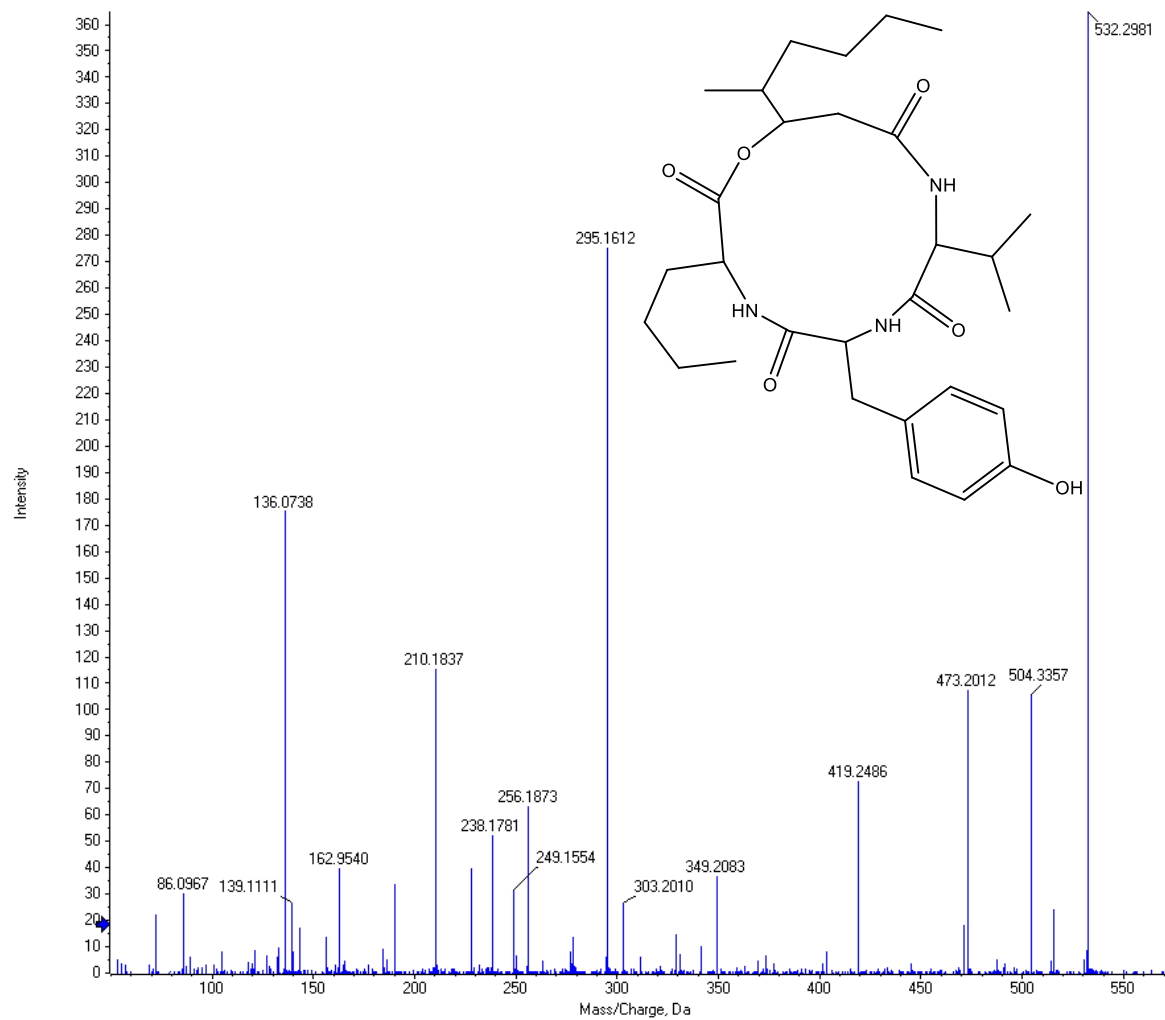

Spectrum from DatasetSET1196.wiff (sample 1) - T FBS PSK Beauveria (1), Experiment 4, +TOF MS<sup>2</sup> (50 - 1250) from 13.992 min  
Precursor: 544.4 Da, CE: 30.0  
With 6 other merged spectra, Gaussian smoothed

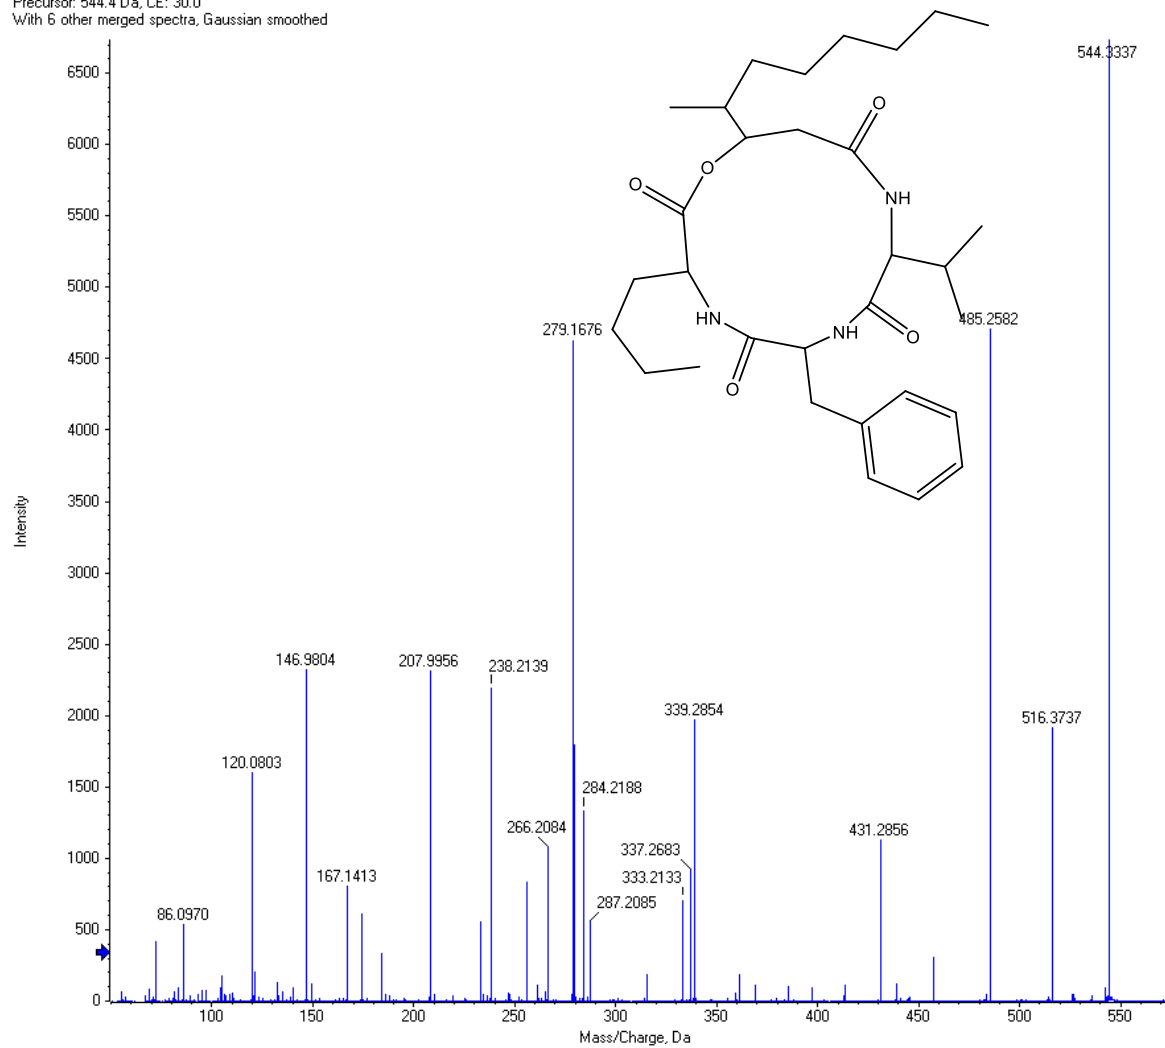

Spectrum from DatasetSET1207.wiff (sample 1) - T FBS PSK Beauveria muscle (3), Experiment 4, +TOF MS<sup>2</sup> (50 - 1250) from 15.350 min  
Precursor: 558.4 Da, CE: 30.0  
With 1 other merged spectrum, Gaussian smoothed

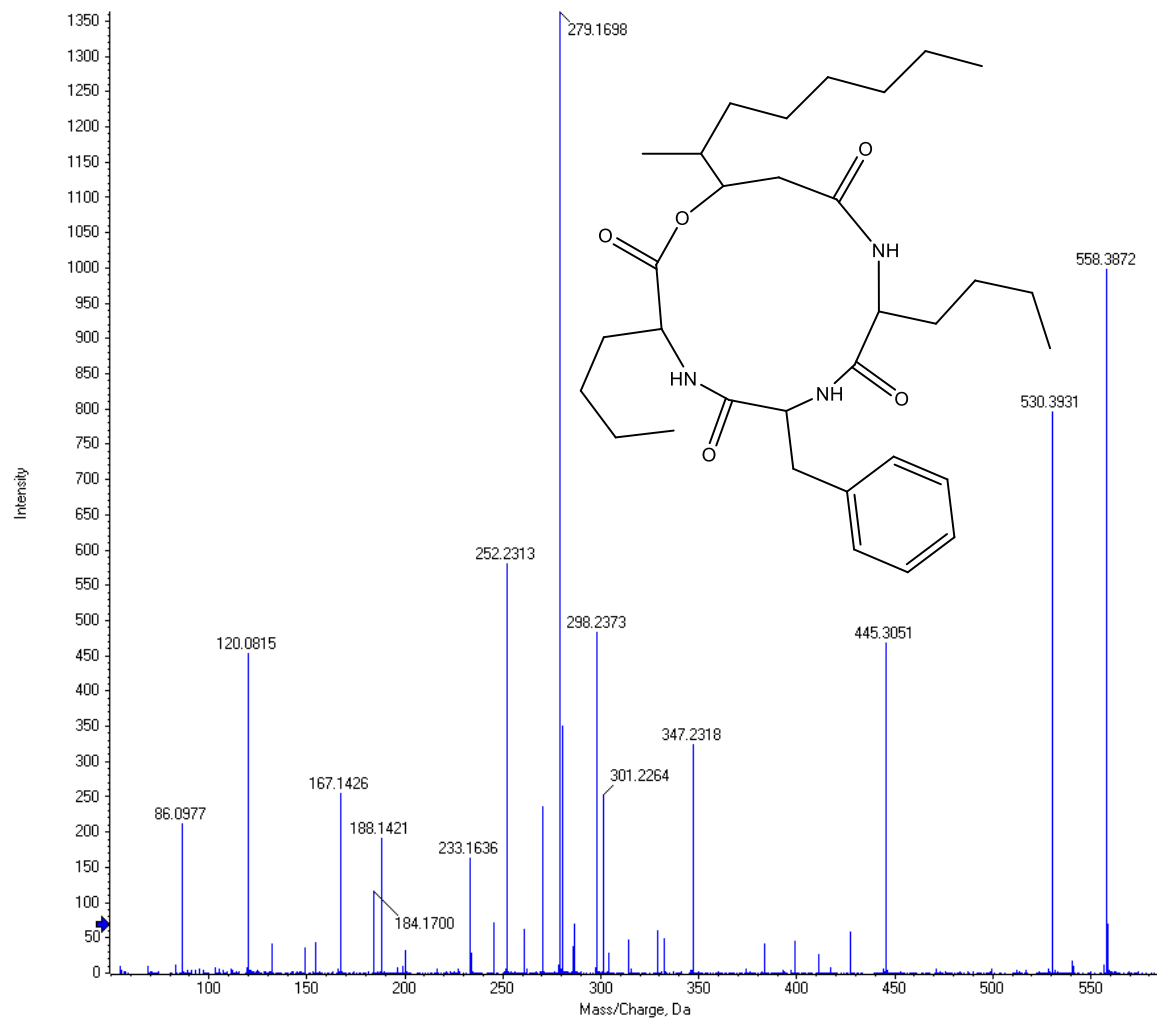

Spectrum from DatasetSET1127.wiff (sample 1) - FBS PSK Beauveria (3), Experiment 2, +TOF MS<sup>2</sup> (50 - 1250) from 14.041 min  
Precursor: 560.4 Da, CE: 30.0, Gaussian smoothed

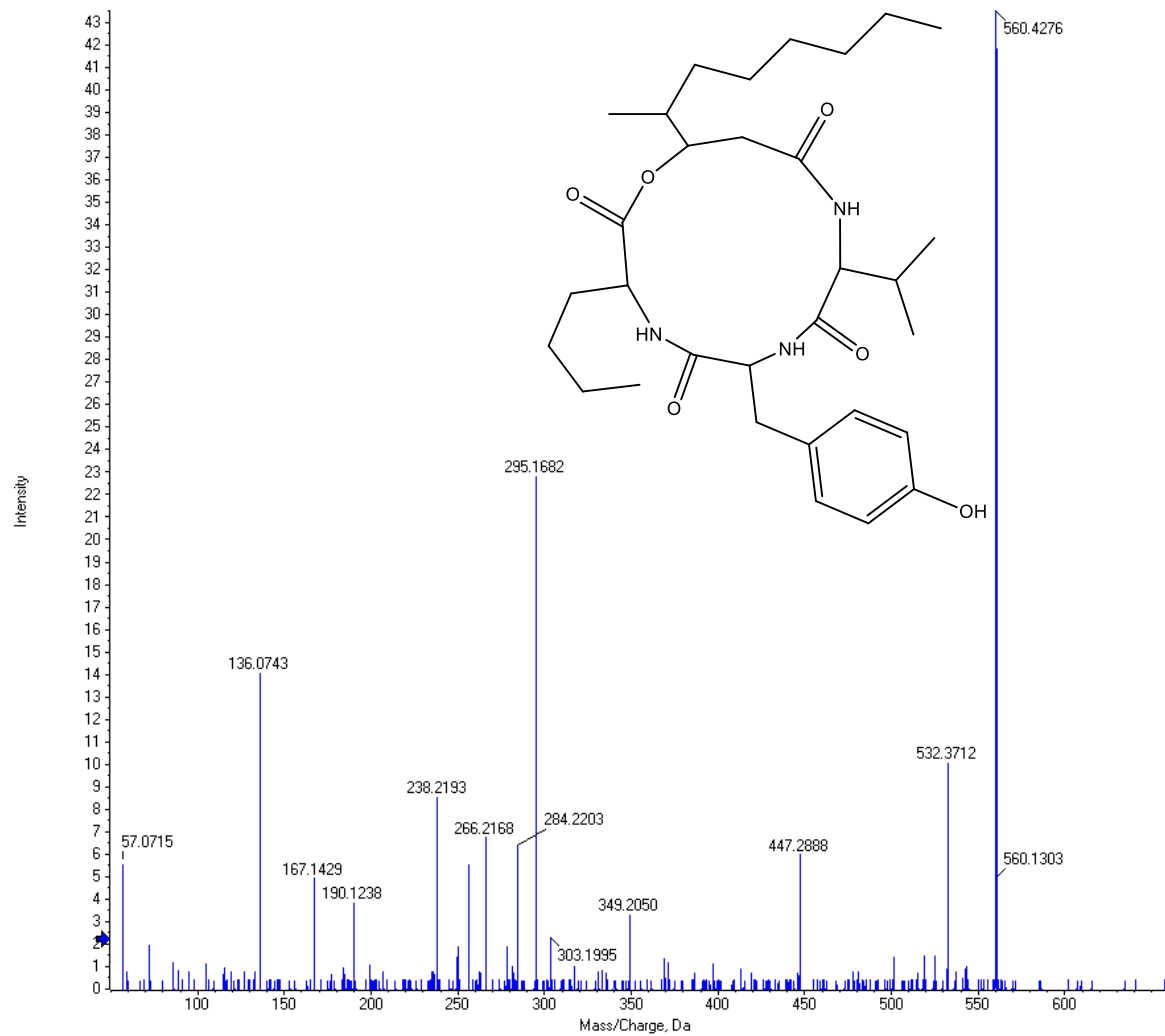

Spectrum from DatasetSET1196.wiff (sample 1) - T FBS PSK Beauveria (1), Experiment 4, +TOF MS<sup>2</sup> (50 - 1250) from 14.227 min  
Precursor: 564.3 Da, CE: 30.0  
With 1 other merged spectrum, Gaussian smoothed

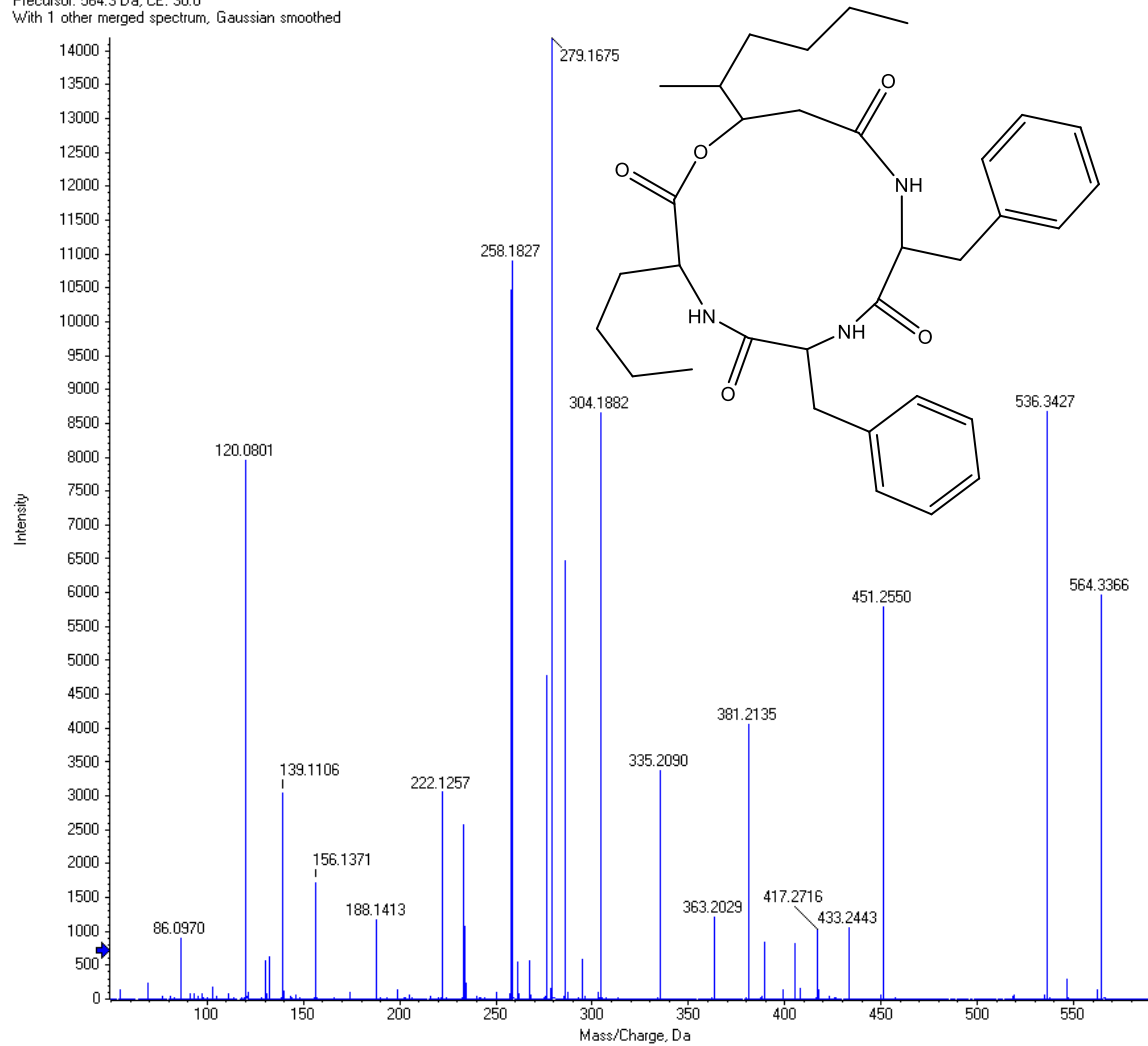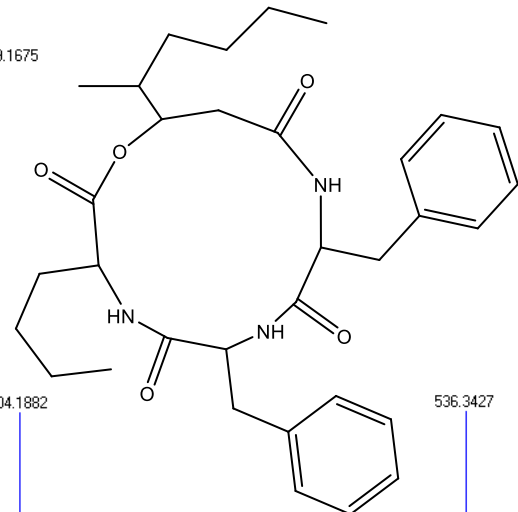

Spectrum from DatasetSET1196.wiff (sample 1) - T FBS PSK Beauveria (1), Experiment 3, +TOF MS<sup>2</sup> (50 - 1250) from 14.697 min  
Precursor: 576.2 Da, CE: 30.0, Gaussian smoothed

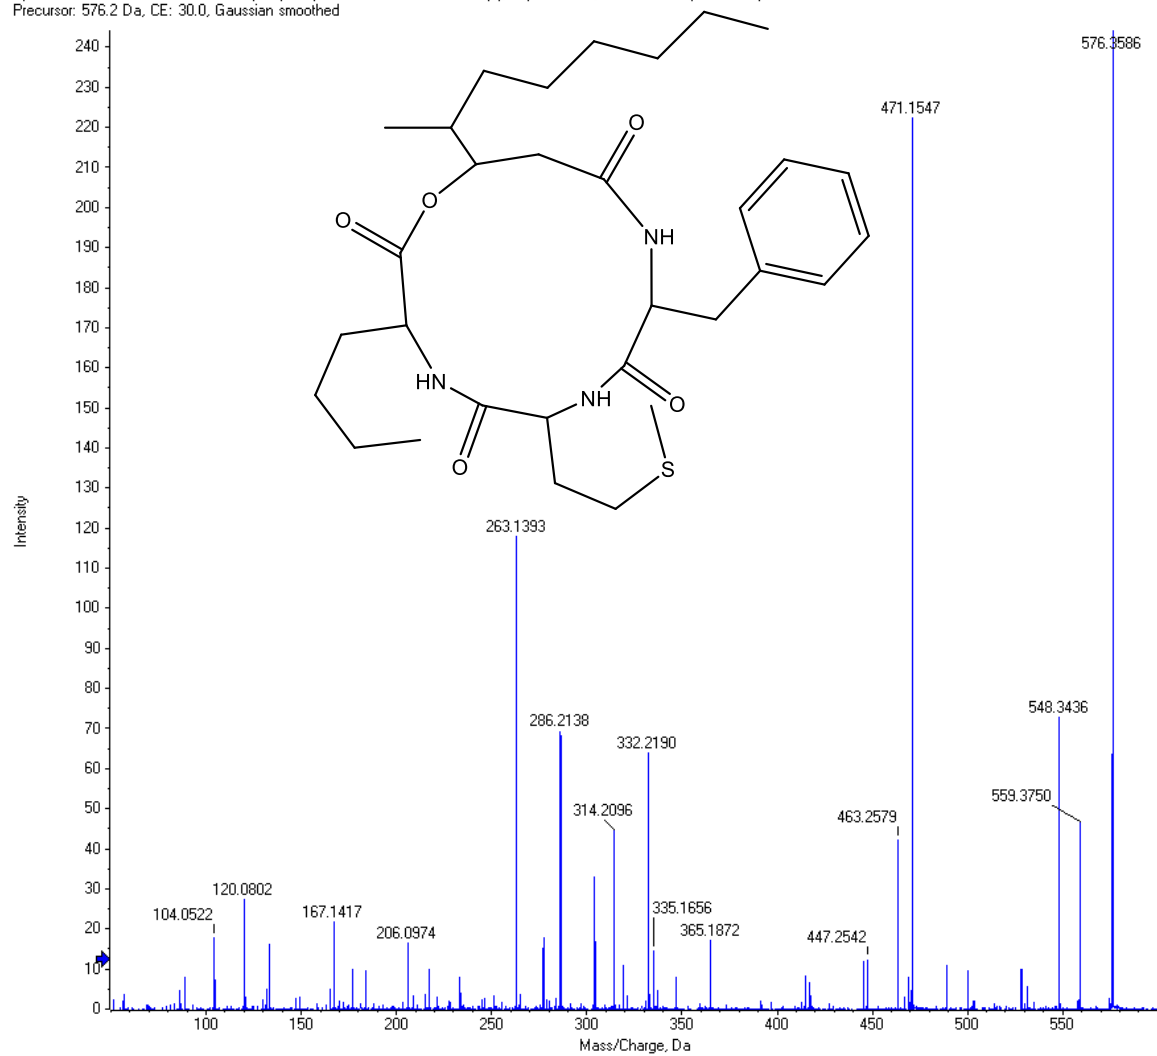

Spectrum from DatasetSET1150.wiff (sample 1) - FBS PSK Beauveria muscle (2), Experiment 4, +TOF MS<sup>2</sup> (50 - 1250) from 13.538 min  
Precursor: 580.3 Da, CE: 30.0, Gaussian smoothed

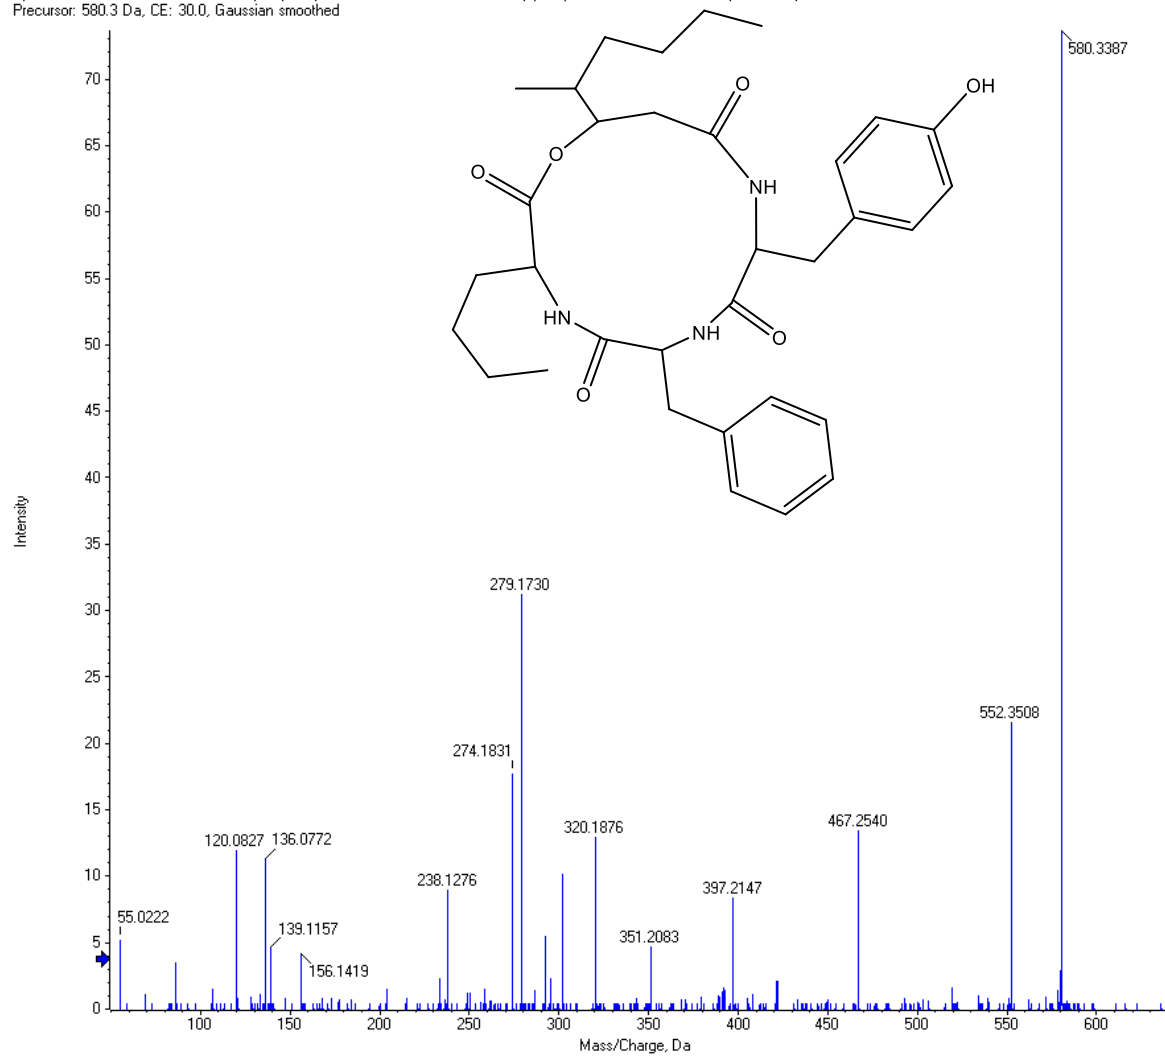



Spectrum from DatasetSET1207.wiff (sample 1) - T FBS PSK Beauveria muscle (3), Experiment 3, +TOF MS<sup>2</sup> (50 - 1250) from 15.322 min  
Precursor: 592.4 Da, CE: 30.0  
With 1 other merged spectrum, Gaussian smoothed

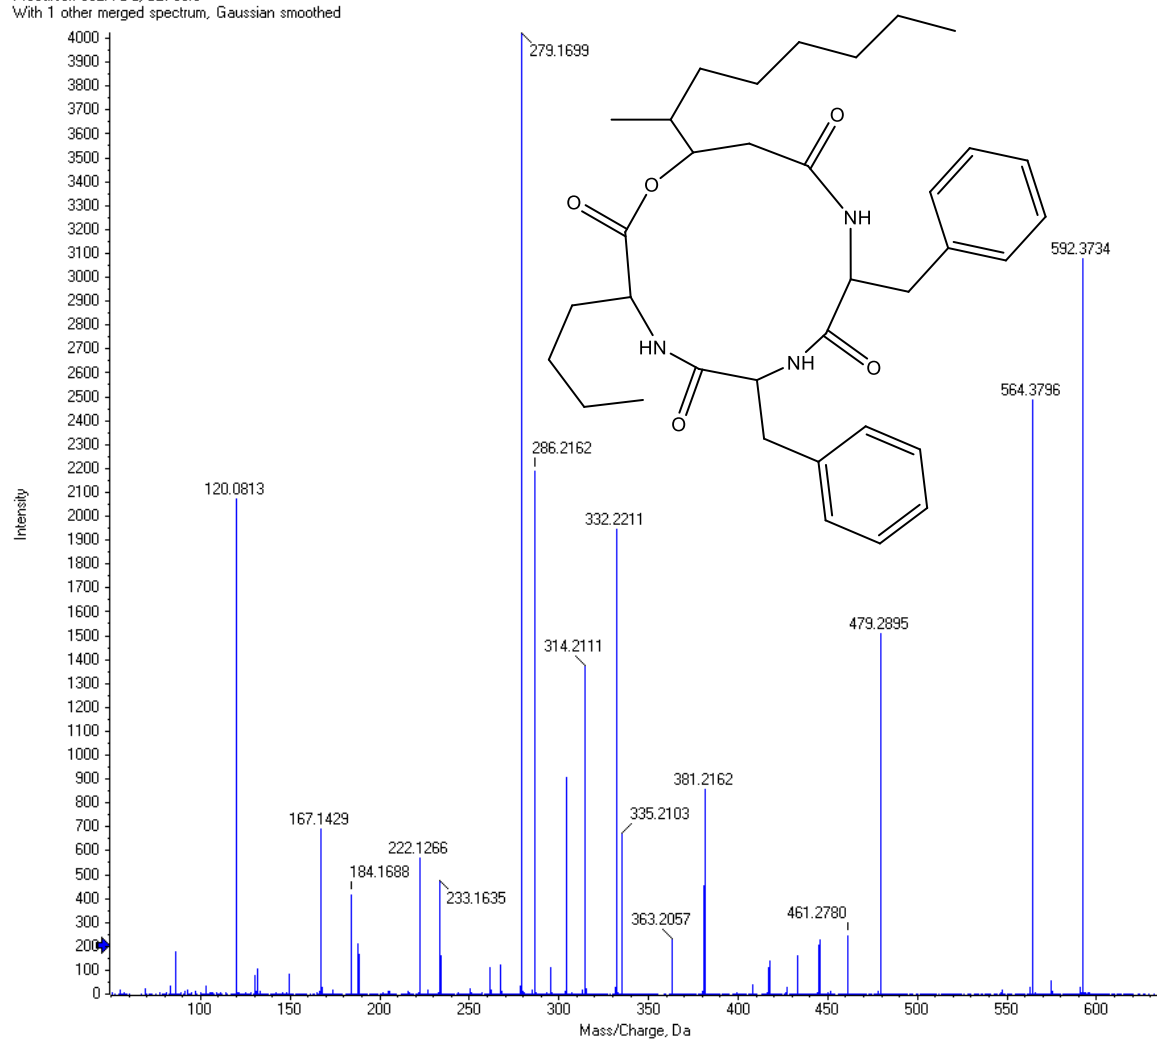

Spectrum from DatasetSET1150.wiff (sample 1) - FBS PSK Beauveria muscle (2), Experiment 2, +TOF MS<sup>2</sup> (50 - 1250) from 14.080 min  
Precursor: 603.4 Da, CE: 30.0  
With 1 other merged spectrum, Gaussian smoothed

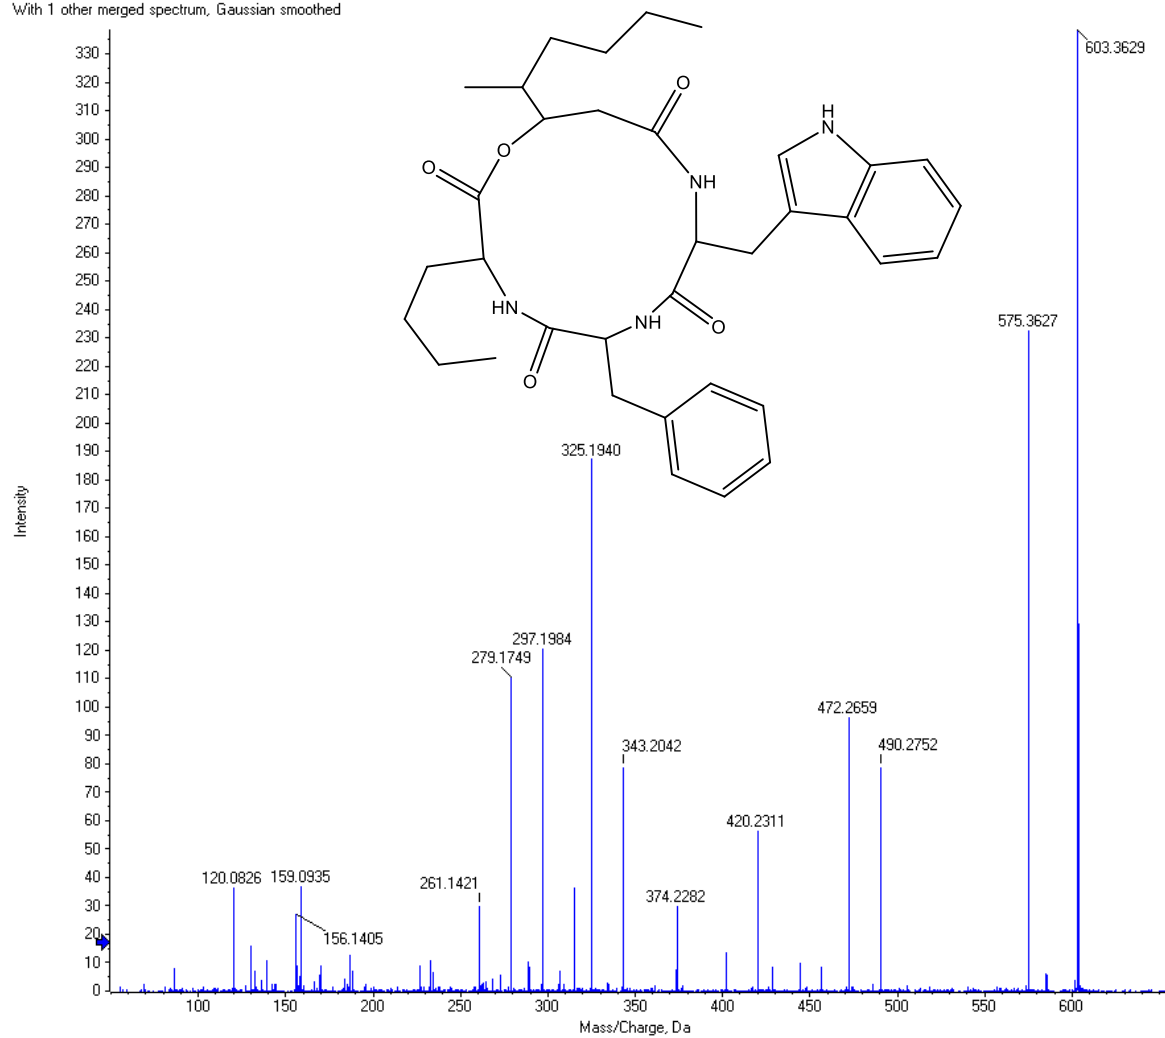

Spectrum from DatasetSET1196.wiff (sample 1) - T FBS PSK Beauveria (1), Experiment 5, +TOF MS<sup>2</sup> (50 - 1250) from 14.229 min  
Precursor: 608.4 Da, CE: 30.0  
With 1 other merged spectrum, Gaussian smoothed

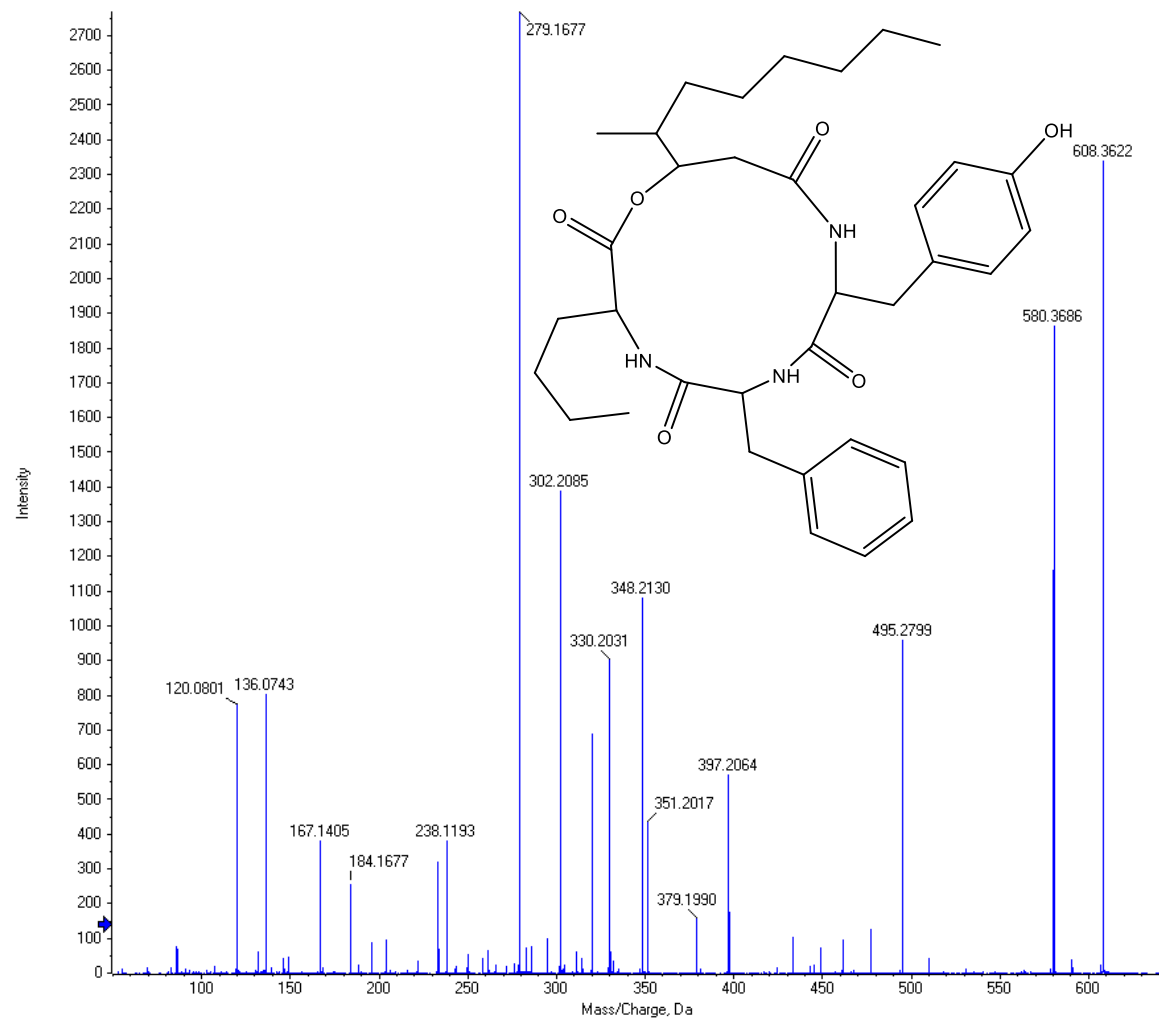

Spectrum from DatasetSET1207.wiff (sample 1) - T FBS PSK Beauveria muscle (3), Experiment 5, +TOF MS<sup>2</sup> (50 - 1250) from 14.835 min  
Precursor: 615.4 Da, CE: 30.0  
With 2 other merged spectra, Gaussian smoothed

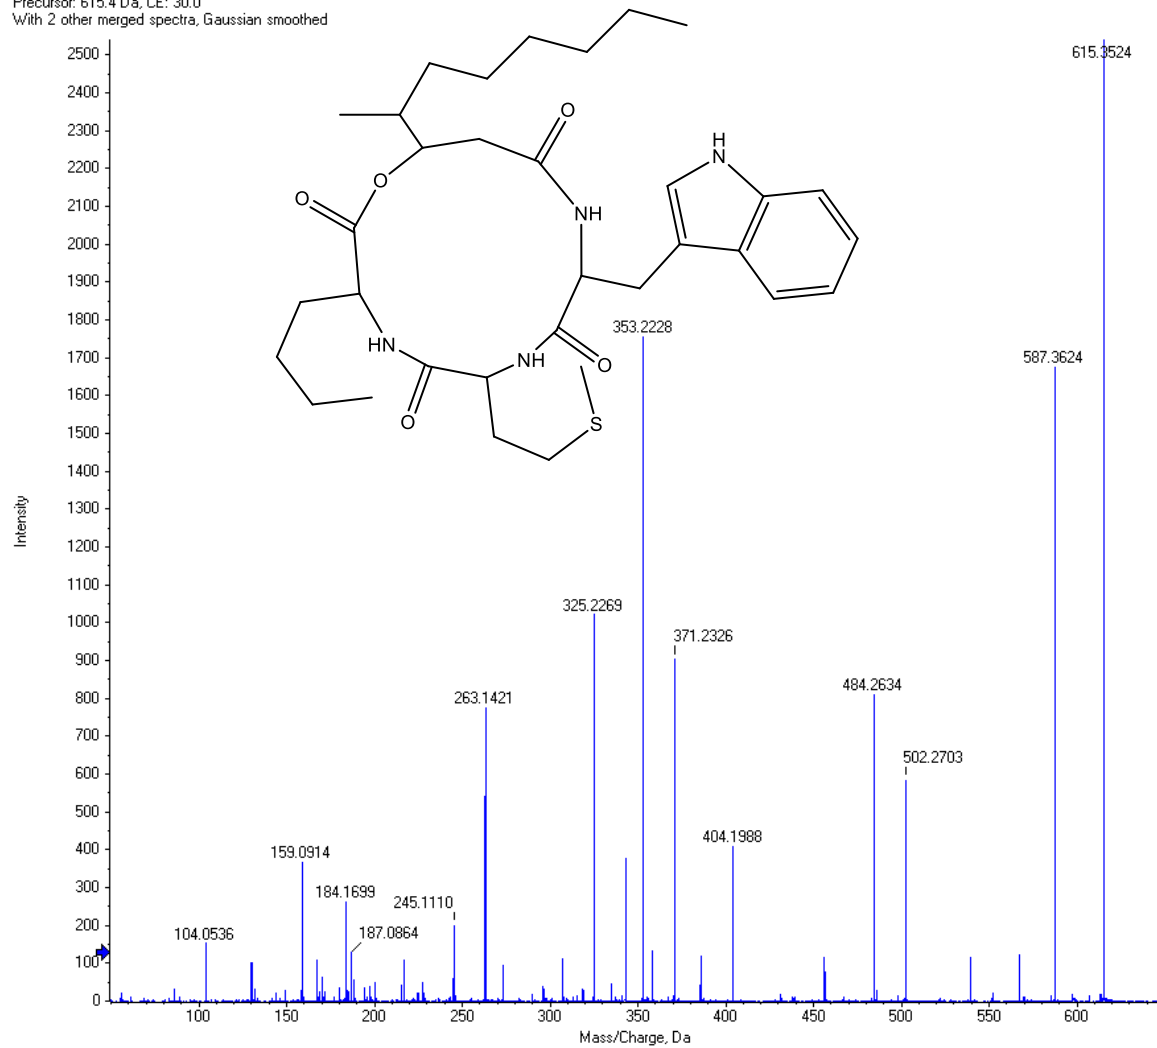

Spectrum from DatasetSET1150.wiff (sample 1) - FBS PSK Beauveria muscle (2), Experiment 4, +TOF MS<sup>2</sup> (50 - 1250) from 14.982 min  
Precursor: 631.4 Da, CE: 30.0, Gaussian smoothed

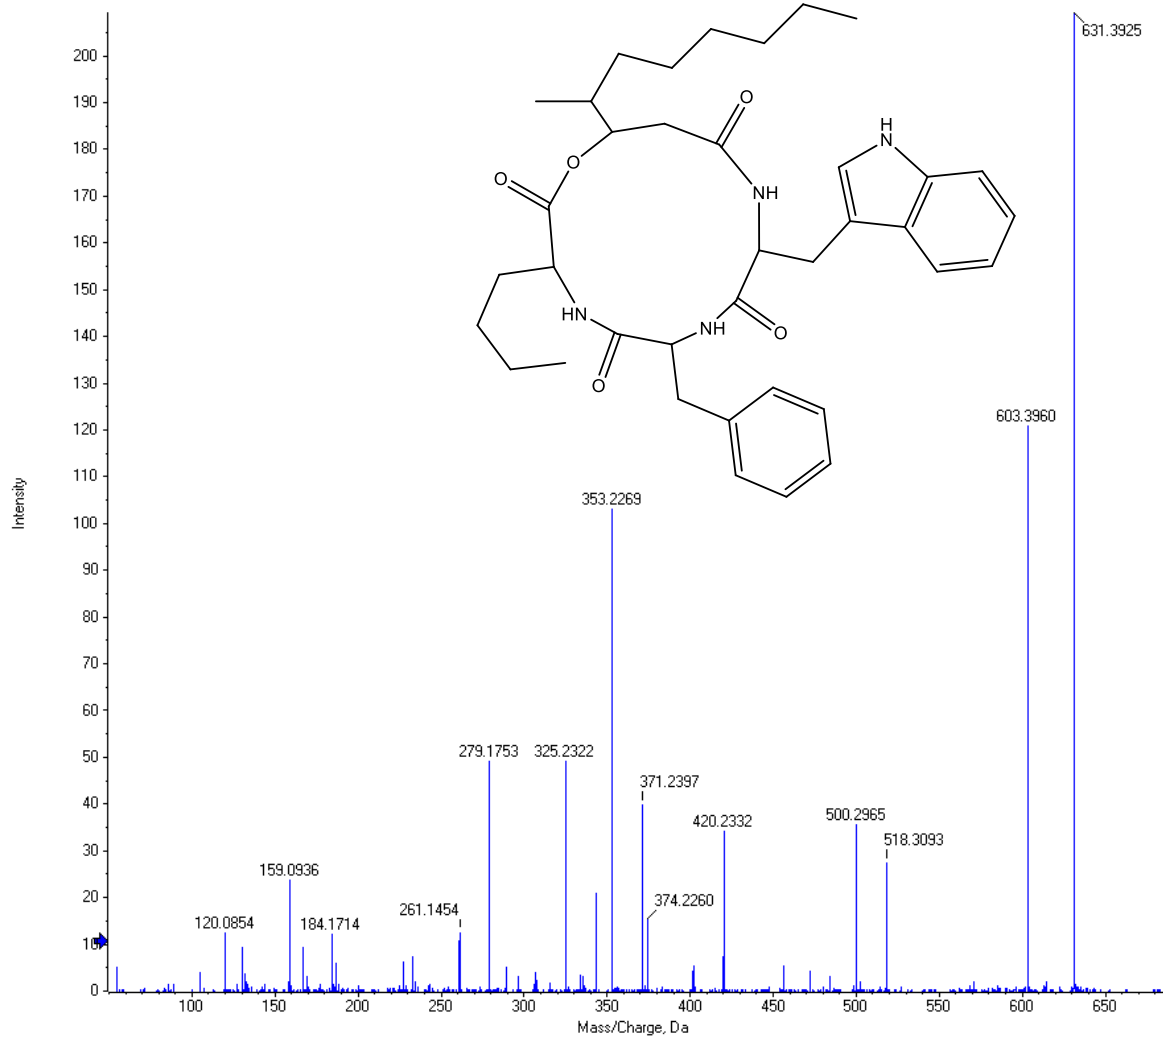

# Destruxins

Product ion mass spectra of the 14 destruxins found in this study in the order as described in Table 2

Spectrum from DatasetSET1167.wiff (sample 1) - PBS PSK Metarhizium brain (1), Exp...t 8, +TOF MS<sup>2</sup> of 564.3 (50 - 850) from 11.816 to 12.030 min), Gaussian smoothed

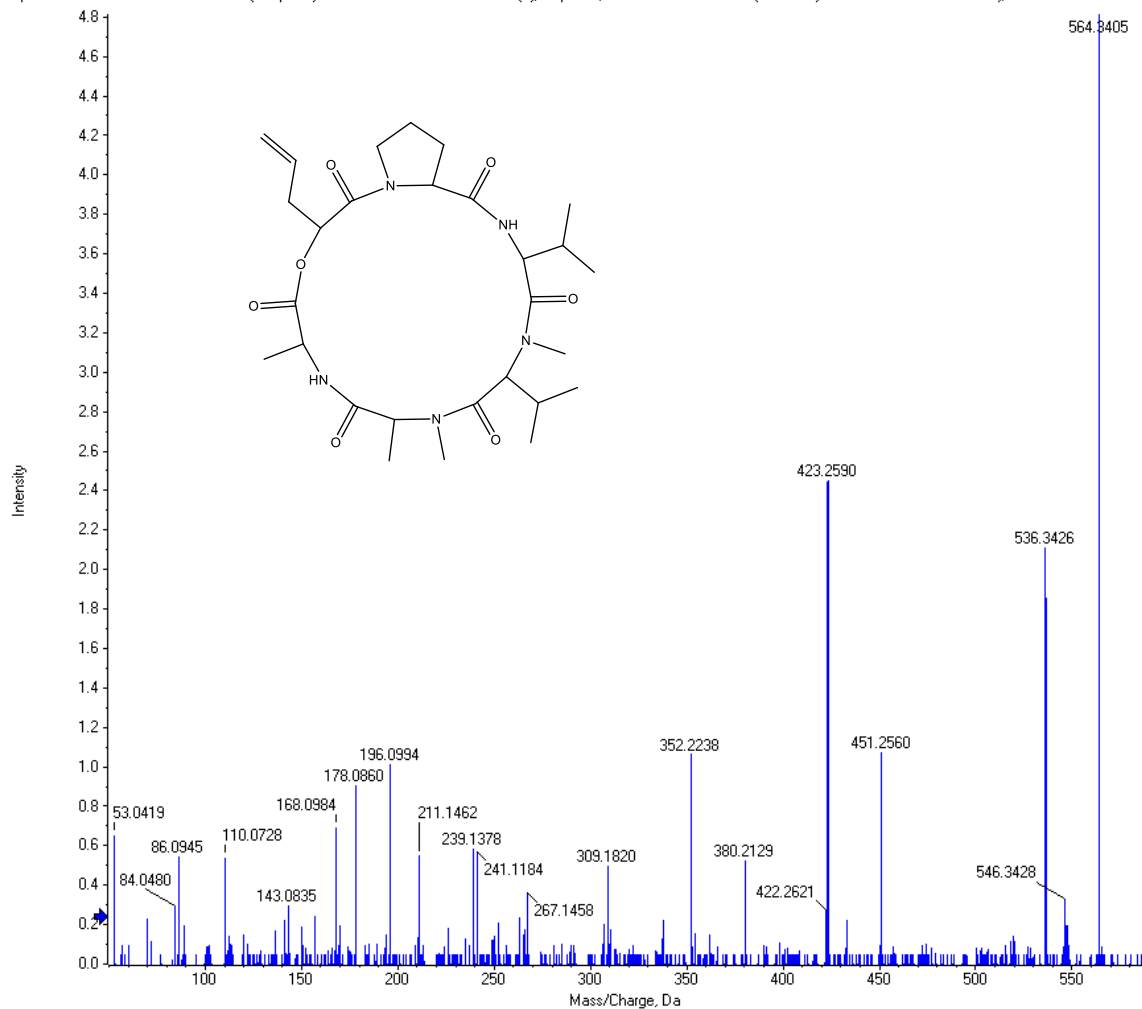

Spectrum from DatasetSET1167.wiff (sample 1) - PBS PSK Metarhizium brain (1), Ex...nt 8, +TOF MS<sup>2</sup> of 564.3 (50 - 850) from 10.853 to 10.943 min, Gaussian smoothed

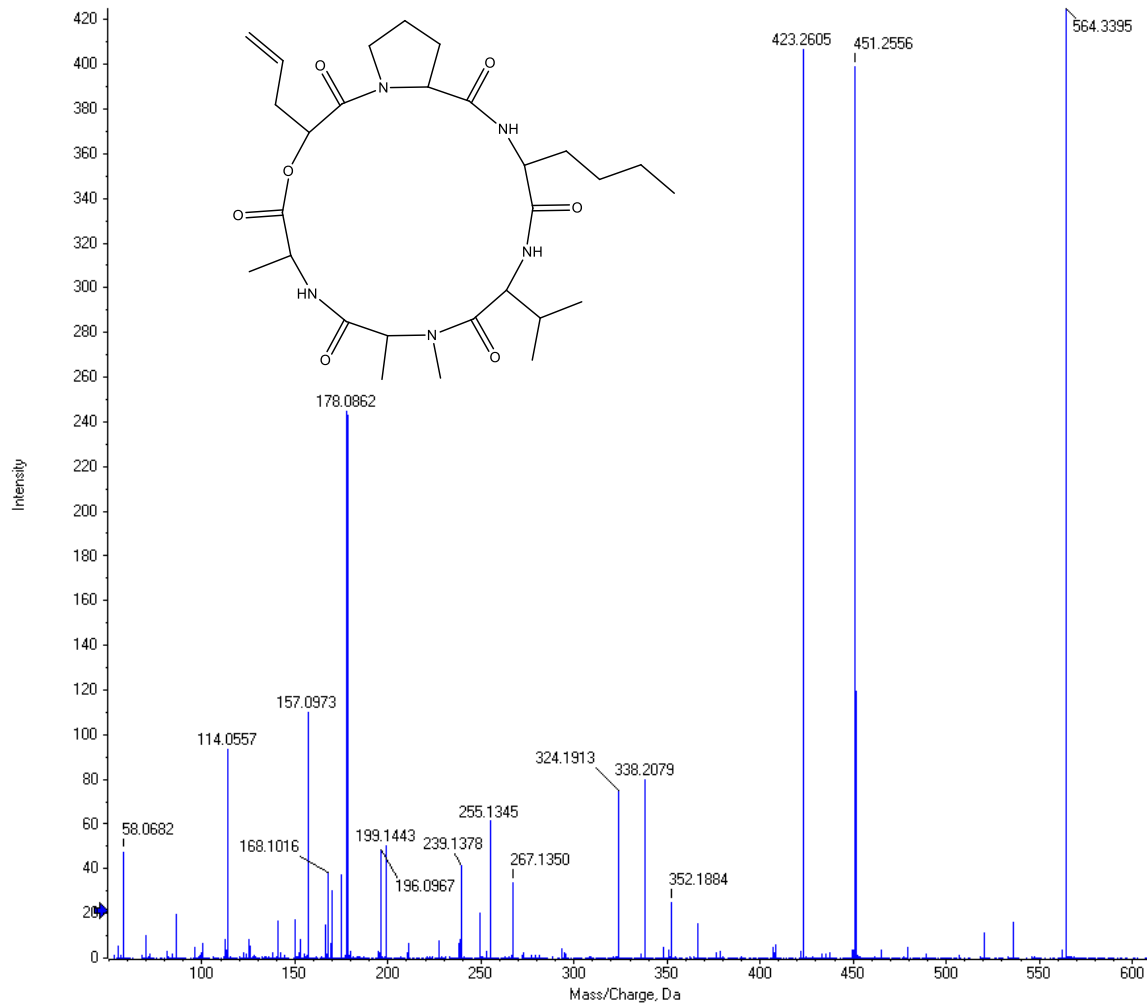



Spectrum from DatasetSET1167.wiff (sample 1) - PBS PSK Metarhizium brain (1), Exp...t 6, +TOF MS<sup>2</sup> of 566.3 (50 - 850) from 12.134 to 12.241 min), Gaussian smoothed

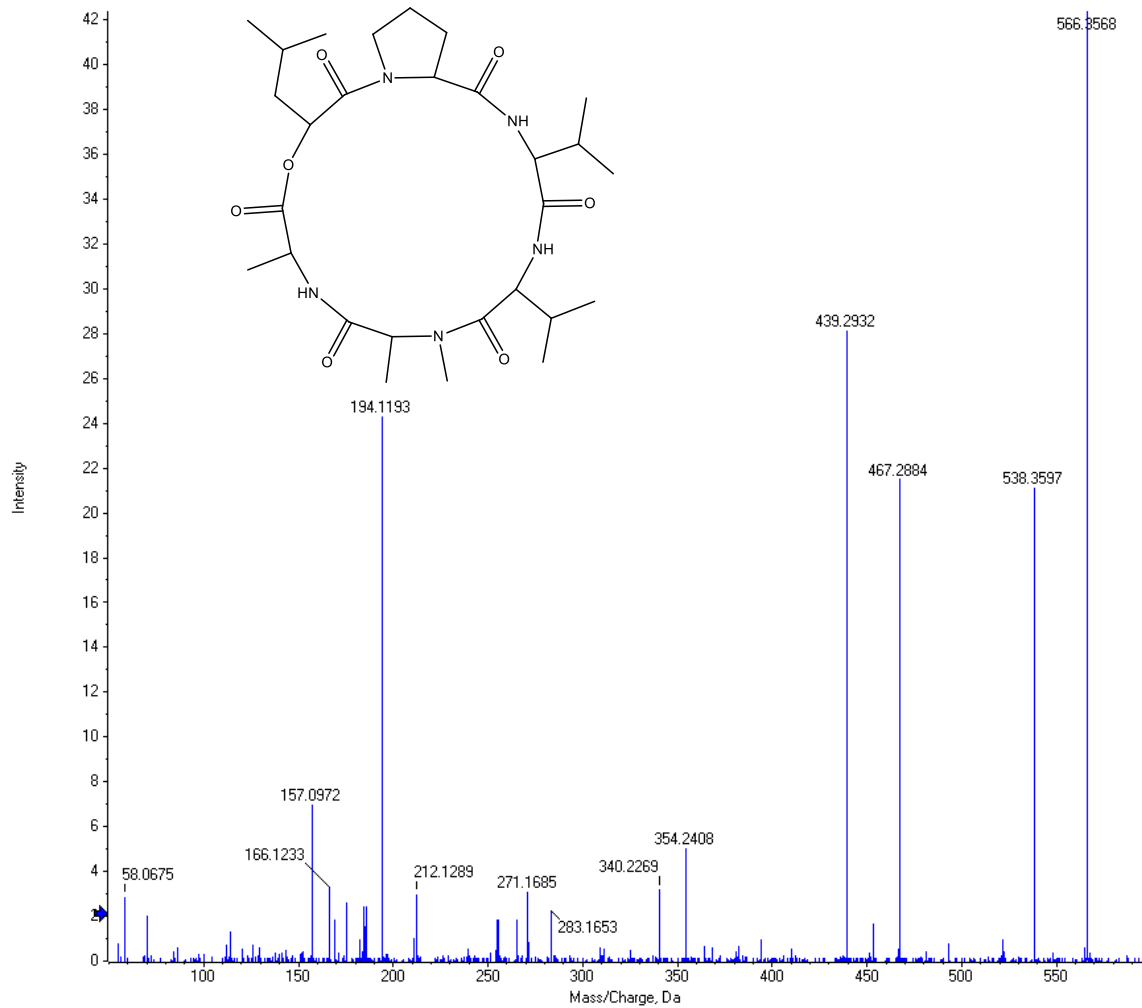

Spectrum from DatasetSET1138.wiff (sample 1) - FBS PSK Metarhizium brain (3), Experiment 2, +TOF MS<sup>2</sup> (50 - 1250) from 11.745 min  
Precursor: 578.4 Da, CE: 30.0, Gaussian smoothed

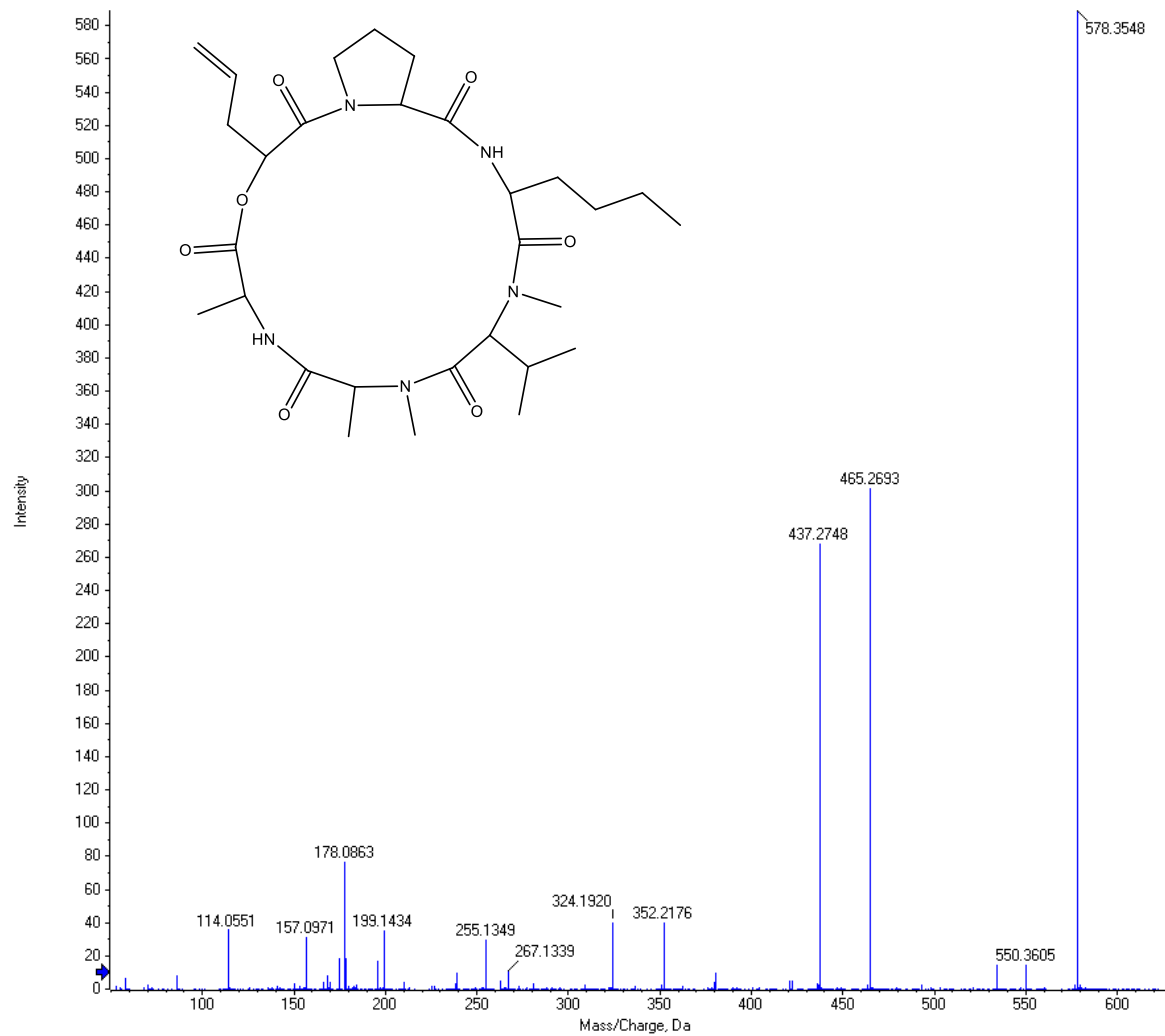

Spectrum from DatasetSET1109.wiff (sample 1) - PBS PSK Metarhizium brain (1), Experiment 3, +TOF MS<sup>2</sup> (50 - 1250) from 9.312 min  
Precursor: 580.3 Da, CE: 30.0  
With 1 other merged spectrum, Gaussian smoothed

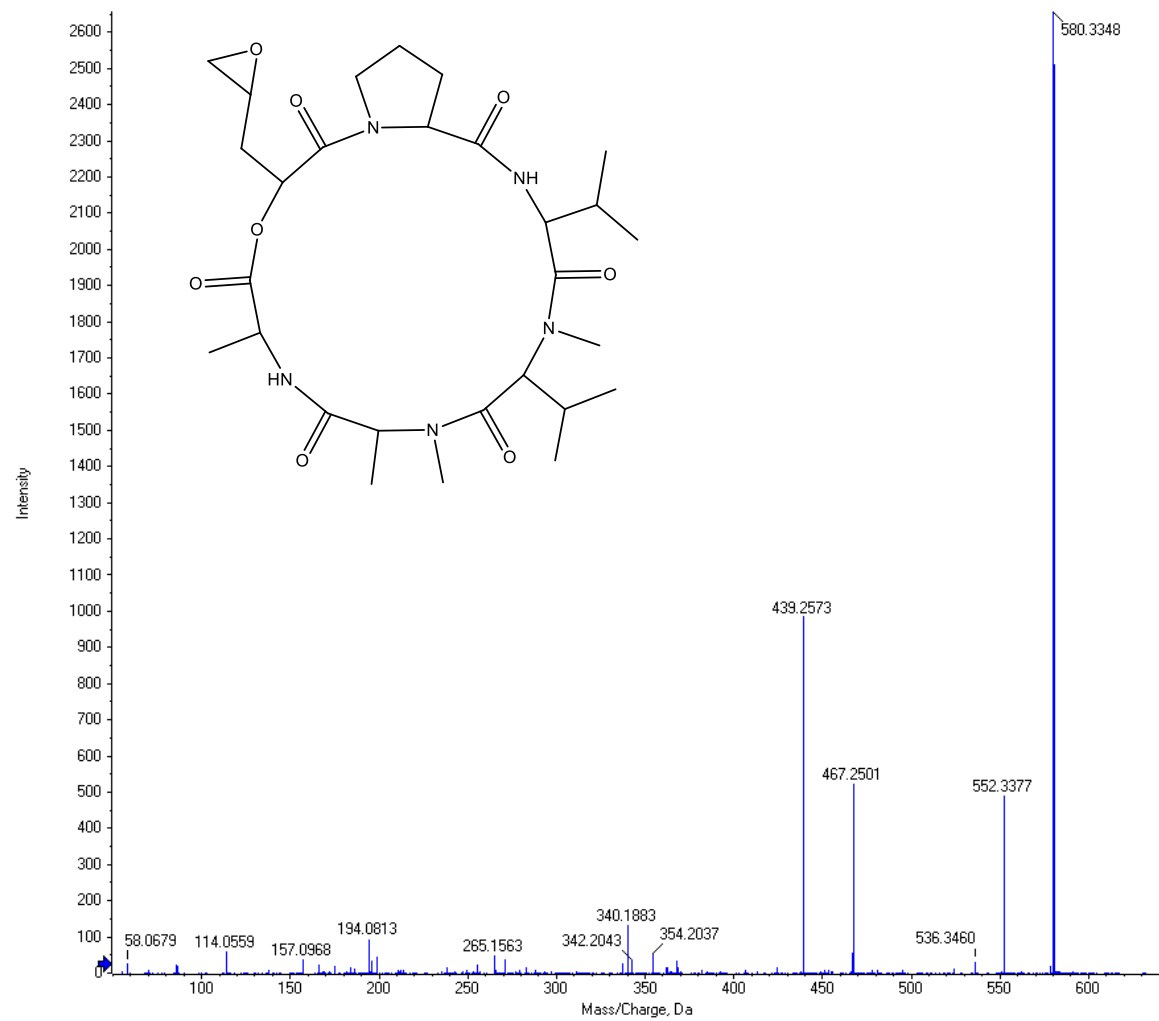

Spectrum from DatasetSET1109.wiff (sample 1) - PBS PSK Metarhizium brain (1), Experiment 2, +TOF MS<sup>2</sup> (50 - 1250) from 12.189 min  
Precursor: 580.4 Da, CE: 30.0  
With 1 other merged spectrum, Gaussian smoothed

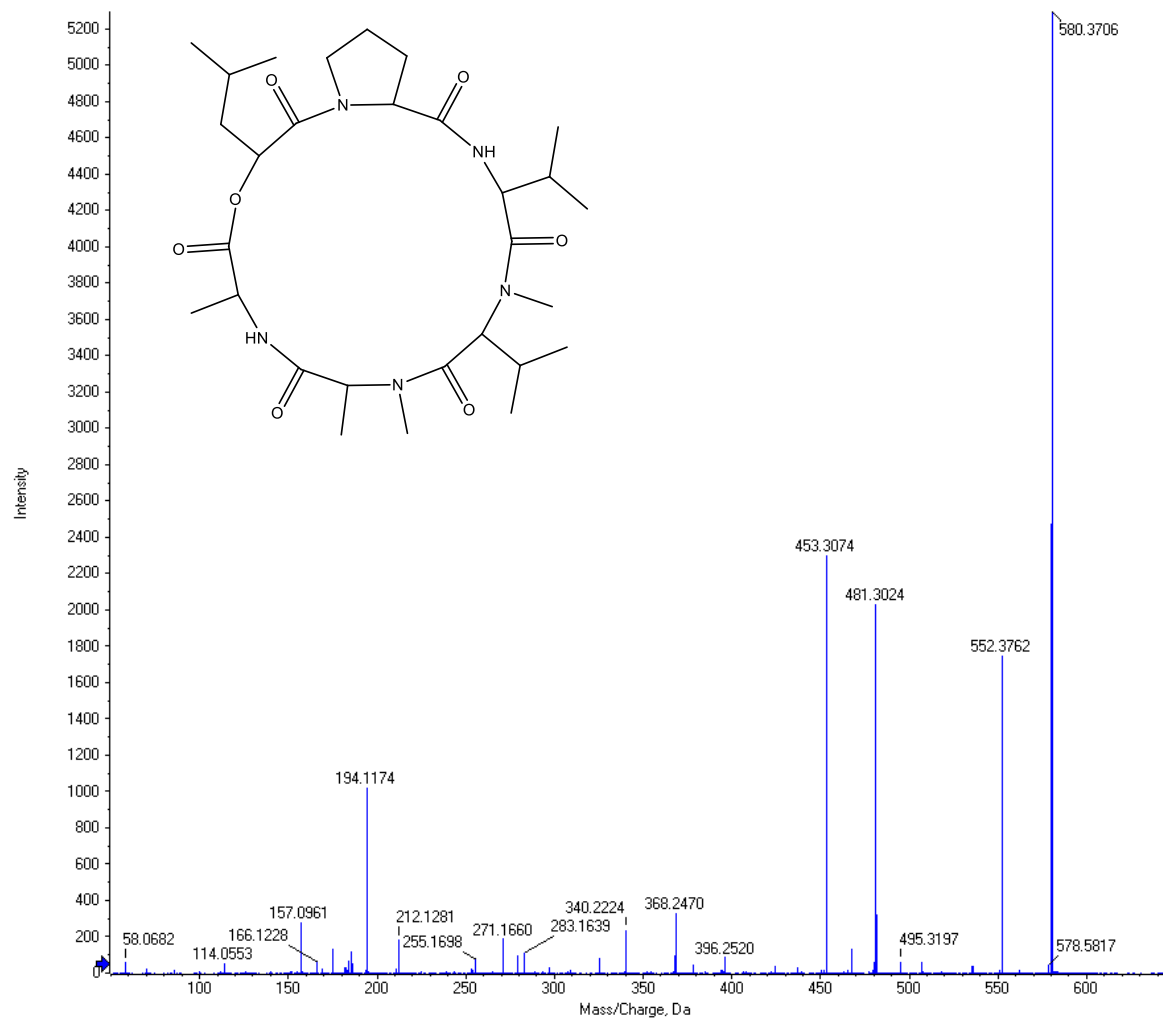

Spectrum from DatasetSET1167.wiff (sample 1) - PBS PSK Metarhizium brain (1), Exp...t 9, +TOF MS<sup>2</sup> of 580.3 (50 - 850) from 12.727 to 12.852 min), Gaussian smoothed

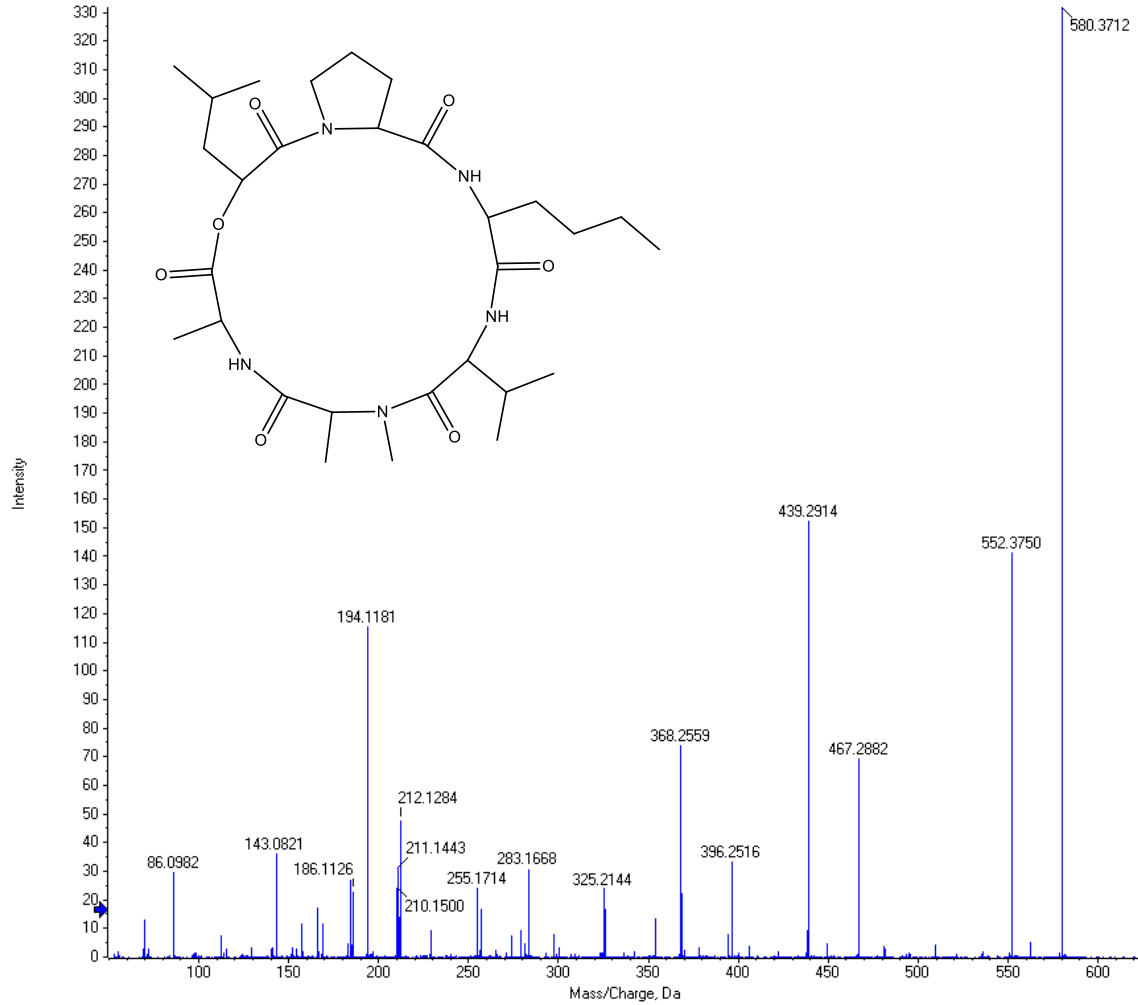

Spectrum from DatasetSET1109.wiff (sample 1) - PBS PSK Metarhizium brain (1), Experiment 3, +TOF MS<sup>2</sup> (50 - 1250) from 12.668 min  
Precursor: 594.4 Da, CE: 30.0  
With 1 other merged spectrum, Gaussian smoothed

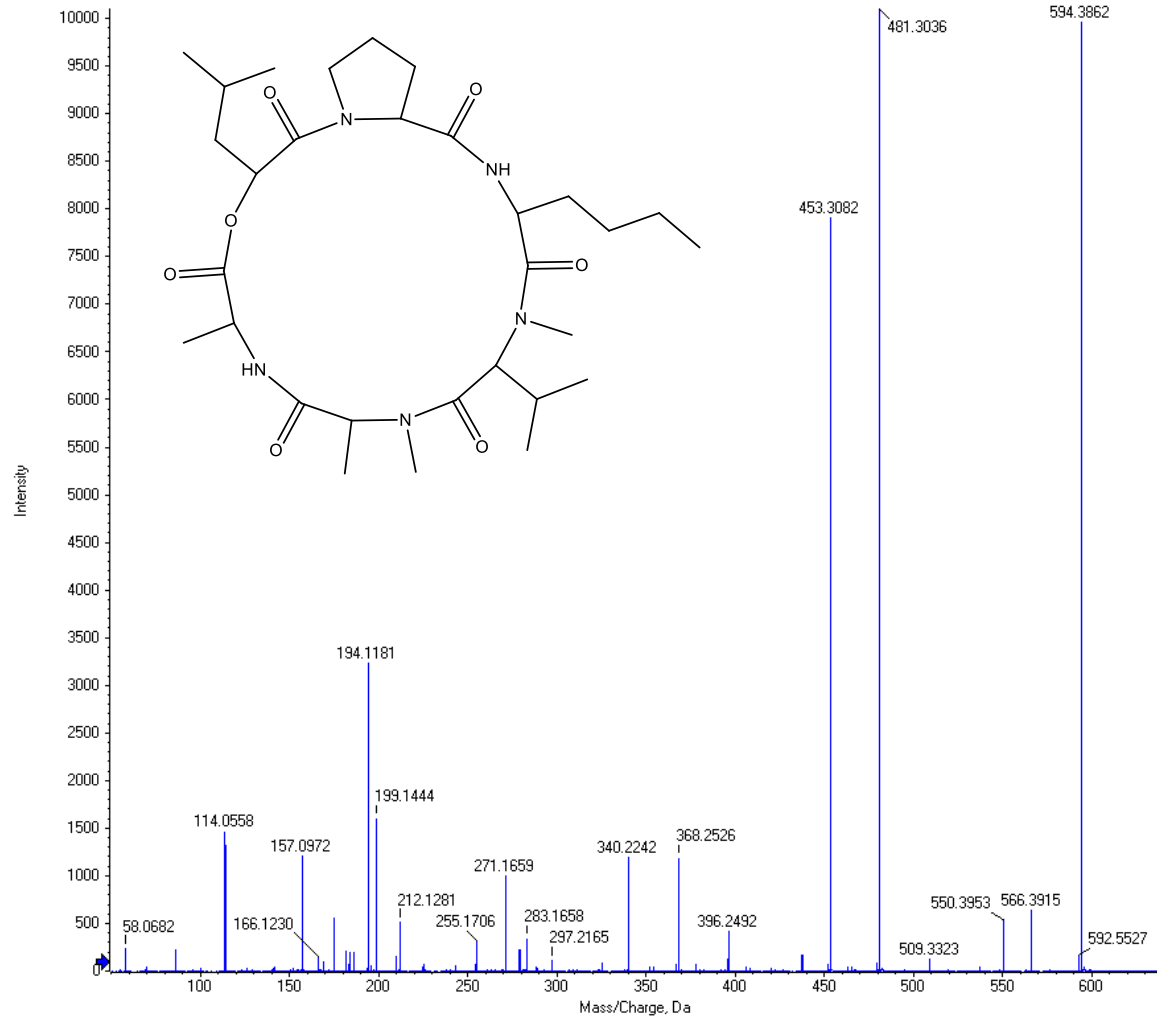

Spectrum from DatasetSET1167.wiff (sample 1) - PBS PSK Metarhizium brain (1), Ex...nt 3, +TOF MS<sup>2</sup> of 594.3 (50 - 850) from 10.114 to 10.221 min, Gaussian smoothed

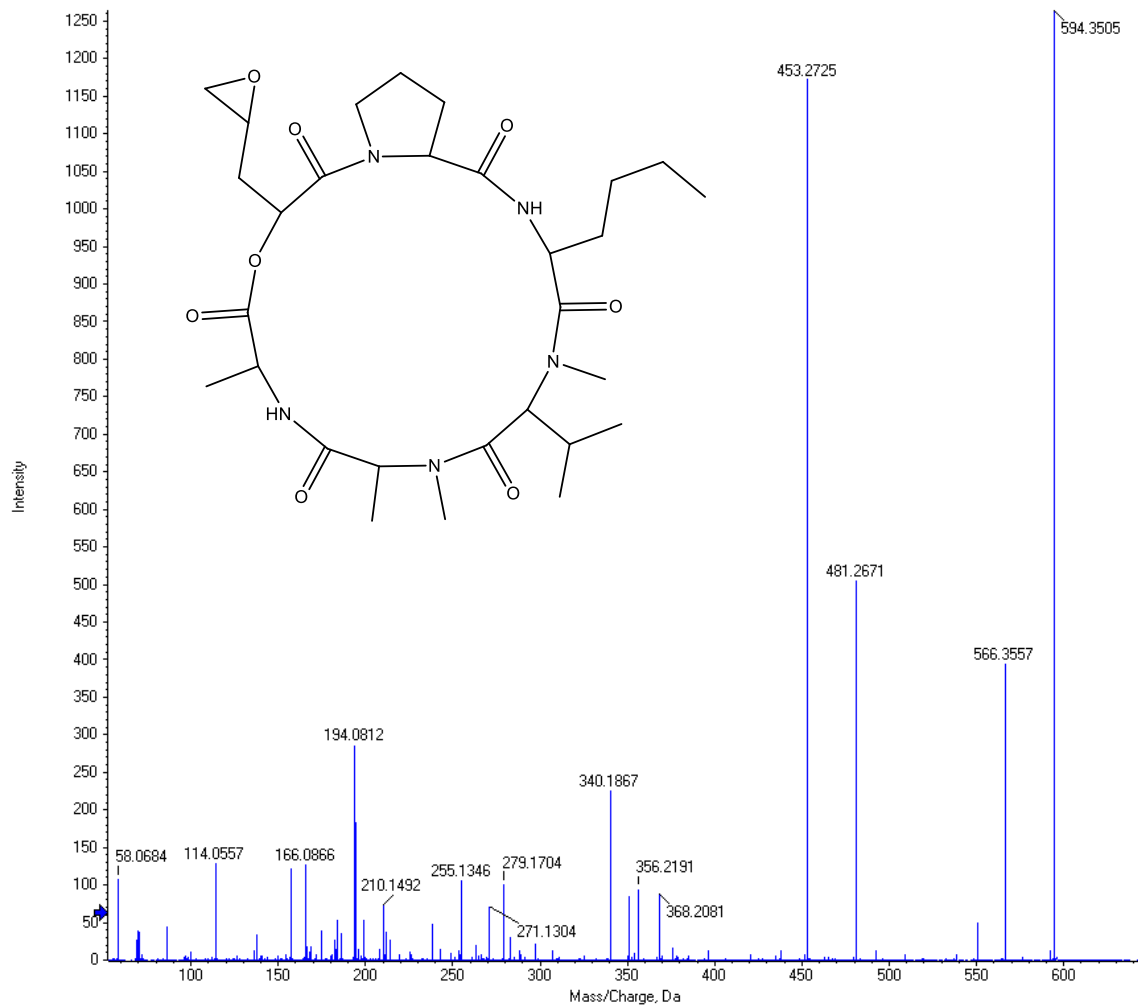

Spectrum from DatasetSET1109.wiff (sample 1) - PBS PSK Metarhizium brain (1), Experiment 2, +TOF MS<sup>2</sup> (50 - 1250) from 9.632 min  
Precursor: 596.4 Da, CE: 30.0  
With 2 other merged spectra, Gaussian smoothed

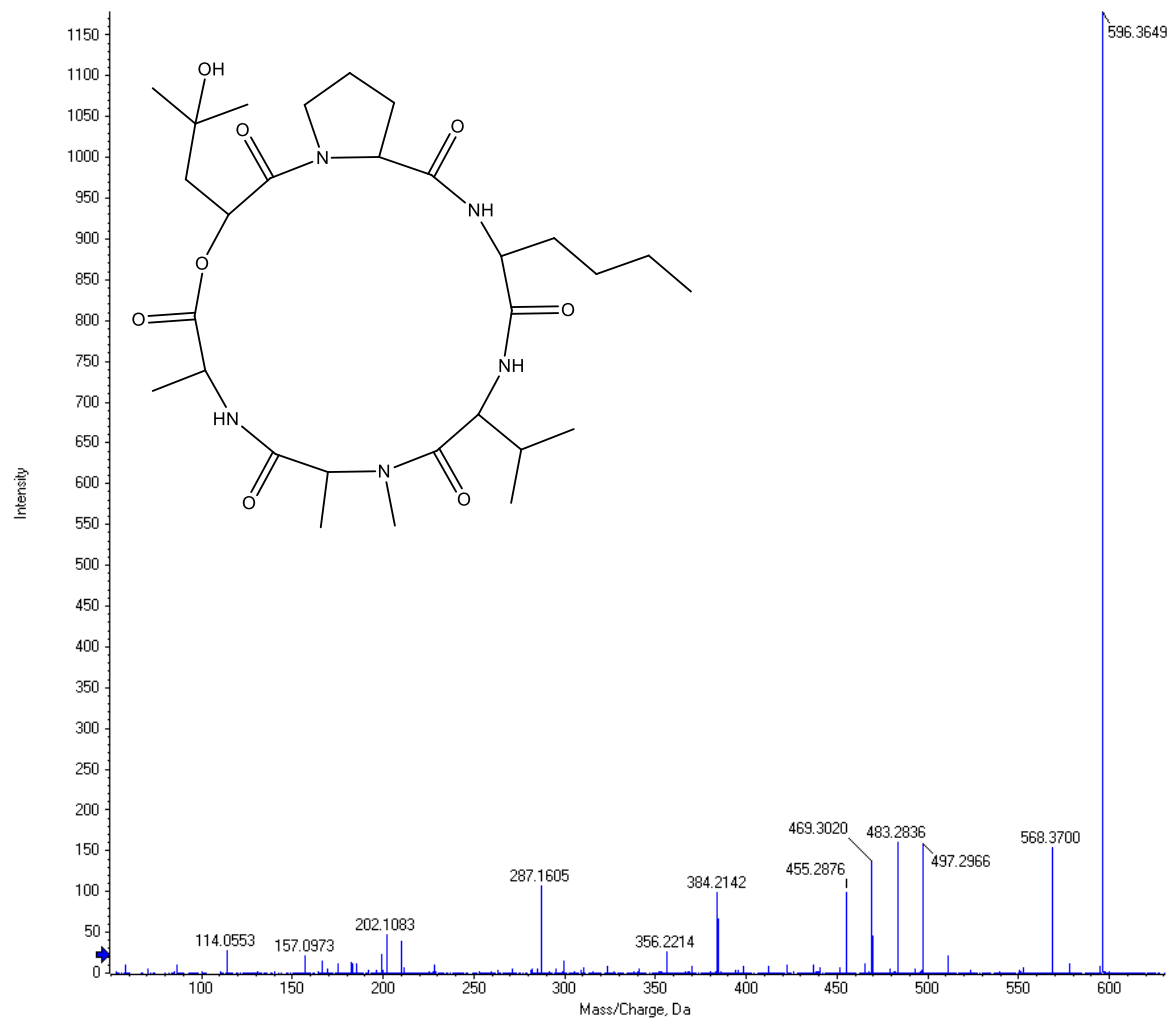



Spectrum from DatasetSET1167.wiff (sample 1) - PBS PSK Metarhizium brain (1), Ex...nt 4, +TOF MS<sup>2</sup> of 610.3 (50 - 850) from 10.383 to 10.490 min, Gaussian smoothed

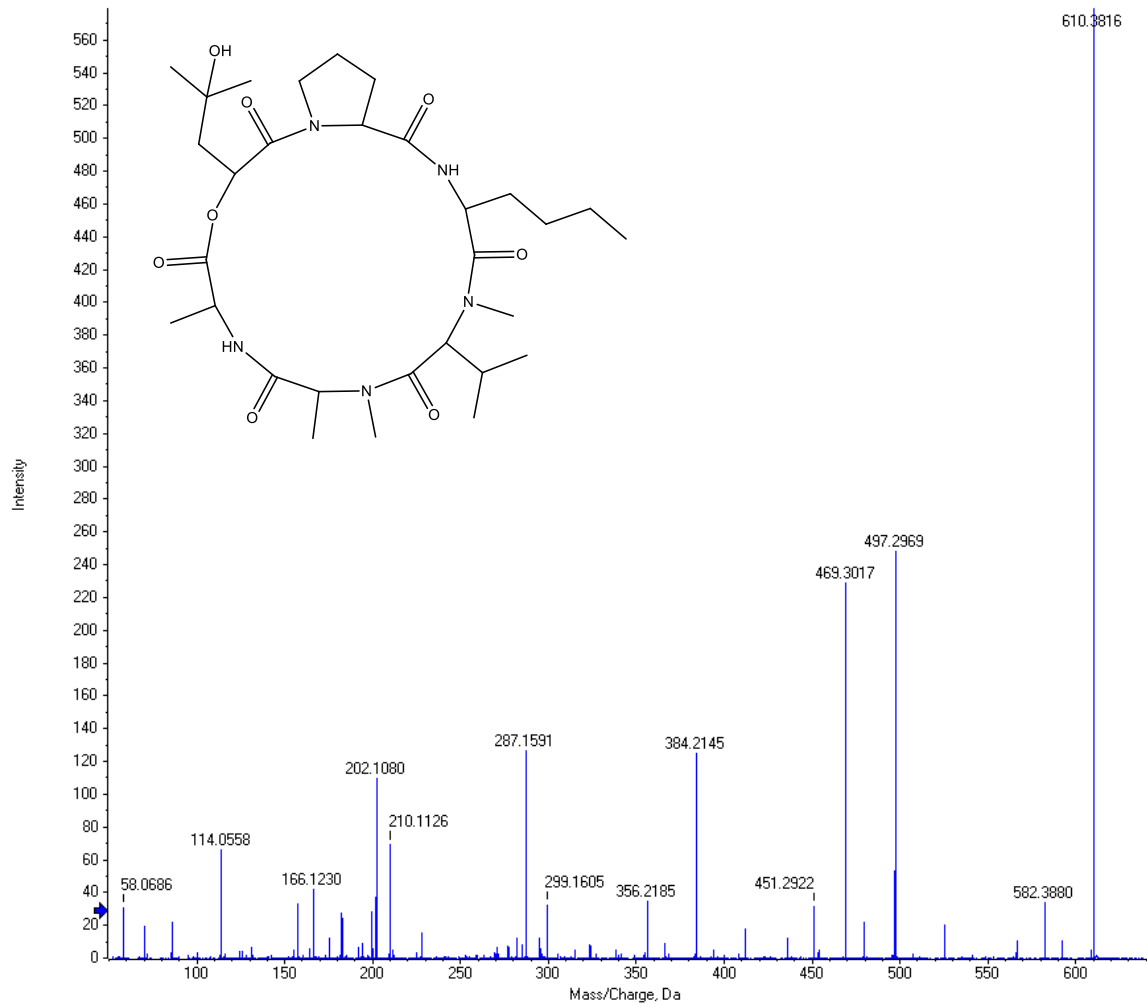

Spectrum from DatasetSET1167.wiff (sample 1) - PBS PSK Metarhizium brain (1), Ex...ment 4, +TOF MS<sup>2</sup> of 610.3 (50 - 850) from 9.510 to 9.581 min, Gaussian smoothed

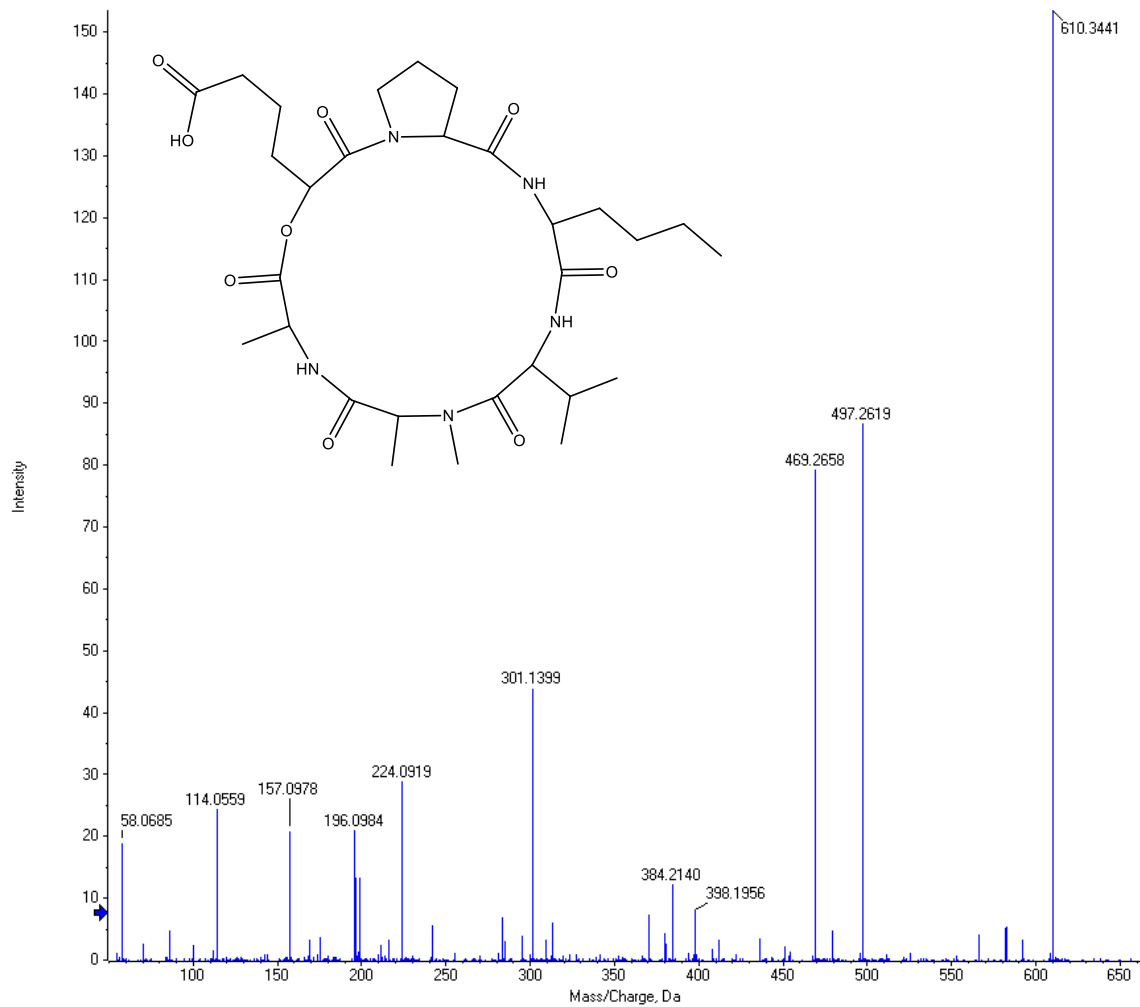



Spectrum from DatasetSET1109.wiff (sample 1) - PBS PSK Metarhizium brain (1), Experiment 2, +TOF MS<sup>2</sup> (50 - 1250) from 9.969 min  
Precursor: 624.4 Da, CE: 30.0  
With 2 other merged spectra, Gaussian smoothed

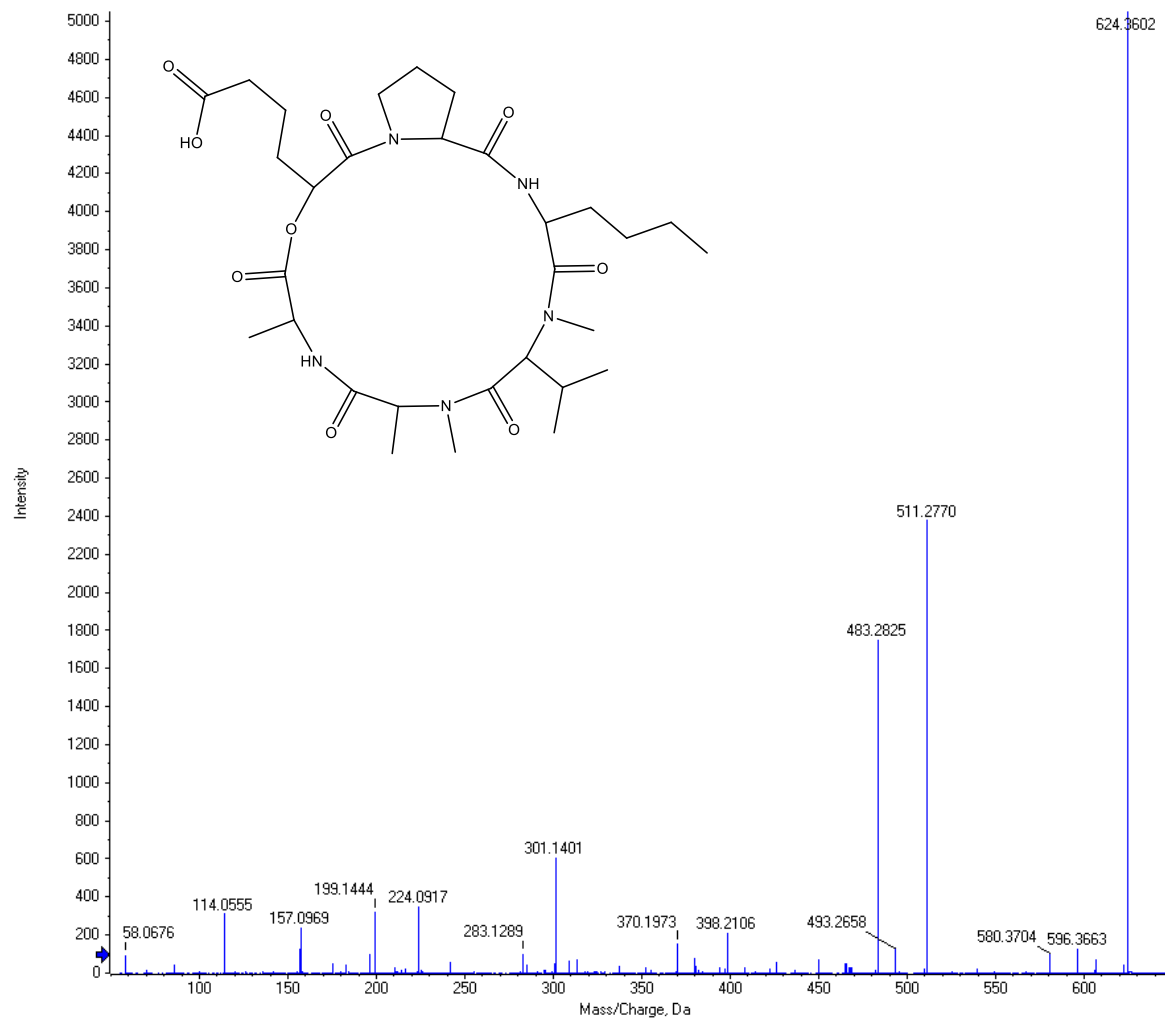

Supplement: pone.0070609.s006.pdf [file pone.0070609.s006.pdf]
