# Supplementary material for: Metabolomics Reveals the Heterogeneous Secretome of Two Entomopathogenic Fungi to Ex Vivo Cultured Insect Tissues
Source: PLoS One. 2013 Aug 5;8(8):e70609. doi: 10.1371/journal.pone.0070609 (PMC3734240; doi:10.1371/journal.pone.0070609)
Supplement: Data File S1 — All unique retention time/mass to charge ratio peaks that are monoisotopic and found between 100 and 800 m/z with retention times between 1 and 16 minutes. (XLSX) [file pone.0070609.s003.xlsx]

## Sheet: unique ion peaks all samples
Data File S1: all unique retention time / mass to charge ratio peaks that are monoisotopic and found between 100 and 800 m/z with retention times between 1 and 16 minutes
Peak Name	m/z	Ret. Time (min.)	ID #	medium control live (1)	medium control live (2)	medium control live (3)	medium control live with antibiotics (1)	medium control live with antibiotics (2)	medium control live with antibiotics (3)	Beauveria live medium control (1)	Beauveria live medium control (2)	Beauveria live medium control (3)	Beauveria live brain (1)	Beauveria live brain (2)	Beauveria live brain (3)	Beauveria live muscle (1)	Beauveria live muscle (2)	Beauveria live muscle (3)	live brain control (1)	live brain control (2)	live brain control (3)	Metarhizium live medium control (1)	Metarhizium live medium control (2)	Metarhizium live medium control (3)	Metarhizium live brain (1)	Metarhizium live brain (2)	Metarhizium live brain (3)	Metarhizium live muscle (1)	Metarhizium live muscle (2)	Metarhizium live muscle (3)	live muscle control (1)	live muscle control (2)	live muscle control (3)	medium control dead (1)	medium control dead (2)	medium control dead (3)	medium control with antibiotics dead (1)	medium control with antibiotics dead (2)	medium control with antibiotics dead (3)	Beauveria dead medium control (1)	Beauveria dead medium control (2)	Beauveria dead medium control (3)	Beauveria dead brain (1)	Beauveria dead brain (2)	Beauveria dead brain (3)	Beauveria dead muscle (1)	Beauveria dead muscle (2)	Beauveria dead muscle (3)	dead brain control (1)
100.0/1.3 (5710)	100.025	1.26	5710	0	0	0	0	0	0	0	0	0	9.94049	0	0	1.39269	10.312	0	0	0	0	0	0	0	0	0	0	0	0	0	0	0	0	0	0	0	0	0	0	0	0	0	0	0	0	0	0	0	0
100.1/2.9 (5719)	100.076	2.92	5719	0	0	0	0	0	0	0	0	0	0	0	0	0	0	0	0	0	0	0	52.7747	0	0	18.5264	0	153.523	33.8694	134.021	0	4.80074	0	0	0	0	0	0	0	0	0	0	0	0	1.49798	0	0	0	0
100.1/3.4 (5721)	100.076	3.39	5721	0	0	1.99369	0	0	0	0	19.6765	43.0047	0	15.4508	11.7588	36.4814	24.1876	40.3433	0	0	0	0	43.034	0	0	0	42.2657	20.3601	24.9028	0	0	0	0	0	0	0	0	0	0	0	0	0	0	0	0	0	0	0	0
100.1/2.8 (5725)	100.076	2.81	5725	21.0297	0	0	0	0	0	0	0	1014.31	0	725.754	0	1410.25	0	1664.77	17.3956	0	0	0	0	6.43527	0	0	0	0	0	0	0	0	0	0	0	0	0	0	0	0	0	0	0	0	2.08196	20.4726	0	2.26622	0
100.1/4.3 (5726)	100.076	4.25	5726	0	0	0	0	0	0	0	0	38.4666	31.89	23.2024	25.5336	29.943	0	41.6695	0	0	0	0	0	0	0	0	0	0	0	0	0	0	0	0	0	0	0	0	0	0	0	0	0	0	0	0	0	0	0
100.1/3.4 (5730)	100.077	3.4	5730	0	0	0	0	0	0	33.9484	0	0	13.9026	0	0	0	0	0	0	0	0	19.0777	0	0	0	0	0	0	0	13.9451	0	0	0	0	0	0	0	0	0	0	0	0	0	0	0	0	0	0	0
100.1/2.7 (5732)	100.077	2.69	5732	0	4.86823	0	0	0	3.61655	1060.07	832.322	0	0	0	1292.29	0	1313.48	0	0	0	0	0	0	0	0	0	0	0	0	0	0	0	0	0	0	0	0	0	1.22614	0	0	0	0	1.18567	0	0	0	0	0
100.1/1.2 (5734)	100.077	1.19	5734	0	0	0	0	0	0	0	0	0	0	0	0	0	0	0	0	0	0	0	4.873	0	0	0	0	0	0	0	0	0	0	0	0	0	0	0	0	0	0	0	0	0	0	0	0	20.1041	0
100.1/1.3 (5735)	100.077	1.32	5735	0	0	0	0	0	0	0	0	0	0	0	0	0	482.302	0	0	0.38979	0	0	0	0	0	0	0	0	1.30636	0	0	2.52231	0	0	0	0	0	0	0	0	0	0	0	0	0	0	0	0	0
100.1/2.8 (5736)	100.077	2.82	5736	0	0	0	0	0	0	0	0	0	935.51	0	0	0	0	0	0	0	0	27.052	0	0	0	0	0	0	0	0	0	0	0	0	0	0	0	0	0	0	0	0	0	0	0	0	0	0	0
101.0/1.6 (5758)	101.023	1.58	5758	73.2228	74.9188	99.089	0	74.6869	68.448	37.9136	49.7034	49.986	4.25128	67.1583	39.1918	33.7617	15.6523	34.9256	70.0733	83.6859	0	34.4477	41.5084	59.6604	34.1978	96.5065	67.9025	42.8282	42.1014	28.77	81.2142	11.5608	38.782	0	0	0	0	0	0	0	0	0	0	0	0	0	0	0	0
101.0/1.2 (5759)	101.024	1.24	5759	5.94961	12.5459	2.96173	0	0	0	0	0	0	1.6112	5.68539	0	0	0	9.33065	0	2.75175	0	0	0	0	0	3.51966	3.65491	0	6.13834	0	0	0	1.78147	0	0	0	0	0	0	0	0	0	0	0	0	0	0	0.903862	0
101.1/1.0 (5765)	101.071	1.01	5765	0	0	0	0	0	0	0	0	0	1.72583	0	0	0	0	0	0	0	1.70027	0	0	0	2.17433	0	6.66584	6.10072	0	0	0	0	0	0	0	0	0	0	0	0	0	0	0	0	0	0	0	0	0
102.0/1.0 (5772)	101.977	1.02	5772	5.48886	0	7.68312	0	6.1398	0	0	0	0	28.3141	0	0	5.84288	0	0	0	0	0	0	0	2.27813	3.74225	7.20591	0	3.70161	2.77069	0	0	7.32909	0	0	0	0	0	0	0	0	0	0	0	0	0	0	0	0	0
102.0/1.2 (5773)	101.978	1.22	5773	0	0.848242	1.69934	0	0.833985	0	0	0	0	115.073	0	1.30088	13.5028	38.1607	0	0	1.45982	0	0.561696	0.766266	0	0	0	2.96101	0	0	0	0	0	0	0	0	0	0	0	0	0.388111	0	0	0	0	0	0	0	0	0
102.1/3.5 (5785)	102.055	3.53	5785	0	0	0	0	0	0	0	0	0	0	0	0	0	0	0	2.23949	1.47038	0	0	0	0	0	1.06321	1.17872	0	0	0	0	0	2.14137	0	0	0	0	0	0	0	0	0	0	0	0	0	0	0	0
102.1/1.1 (5786)	102.055	1.14	5786	296.289	216.134	183.508	212.98	179.715	190.613	108.291	147.723	80.039	96.7685	68.5691	146.337	94.052	164.341	144.927	256.072	174.28	0	252.016	177.723	138.156	230.98	146.944	155.02	130.027	223.332	182.412	185.109	268.56	190.981	0	0	0	0	0	0	0	0	0	0	0	0	0	0	0	0
103.1/1.4 (5801)	103.054	1.44	5801	0	0	0	0	0	0	0	0	0	0	0	0	0	0	0	0	0	0	452.618	0	0	646.792	0	0	0	0	390.688	0	0	0	0	0	0	0	0	0	0	0	0	0	0	0	0	0	0	0
103.1/2.6 (5802)	103.054	2.62	5802	38.6349	496.464	0	0	875.608	678.444	472.124	481.254	551.589	458.429	517.996	346.105	557.392	641.957	460.917	1195.56	0	671.655	0	714.401	0	0	0	0	0	872.101	0	0	0	1141.25	0	0	0	0	0	0	0	0	0	0	0	0	0	0	0	0
103.1/1.8 (5803)	103.055	1.76	5803	813.514	0	0	0	0	0	0	0	0	2.08878	0	0	0	0	396.516	0	0	0	0	0	0	0	0	0	0	0	0	0	0	0	0	0	0	0	0	0	0	0	0	0	0	0	0	0	0	0
103.1/2.8 (5804)	103.055	2.79	5804	0	1.64065	790.397	0	0	0	0	0	0	0	0	0	0	0	0	0	1175.59	0	1472.43	0	747.549	0	1077.92	1169.71	1146.35	0	1092.79	1094.11	852.874	0	0	0	0	0	0	0	0	0	0	0	0	0	0	0	0	0
103.1/1.9 (5807)	103.056	1.9	5807	0	10.0809	48.2622	0	0	0	0	0	6.90477	3.64688	0	4.46187	1.00904	0	0	0	0	22.2002	0	3.64703	0	0	0	0	0	0	0	30.6122	0	0	0	0	0	0	0	0	0	0	0	0	0	0	0	0	0	0
104.1/1.1 (5828)	104.052	1.14	5828	1193.73	0	837.227	621.419	846.883	832.574	0	623.616	635.299	0	571.221	43.1529	549.842	0	815.147	869.048	834.938	0	0	690.699	711.372	797.337	896.957	787.275	940.857	757.636	967.817	866.583	0	781.996	0	0	0	0	0	0	0	0	0	0	0	0	0	0	0	0
104.1/1.1 (5829)	104.053	1.14	5829	0	775.584	0	117.89	0	0	616.741	0	0	586.406	0	576.962	0	697.118	0	0	0	791.735	902.948	0	0	0	0	0	0	0	0	0	1065.38	0	0	0	0	0	0	0	0	0	0	0	0	0	0	0	0	0
104.1/2.7 (5830)	104.056	2.71	5830	0	0	0	0	55.6487	0	0	0	0	0	0	0	45.2531	0	0	0	70.6202	0	0	0	0	0	0	0	0	0	0	0	0	0	0	0	0	0	0	0	0	0	0	0	0	0	0	0	0	0
104.1/2.5 (5834)	104.059	2.47	5834	10.9137	0	0	0	0	0	0	0	0	0	0	0	0	1.53557	7.53445	21.0259	0	45.9072	0	0	0	0.847582	0	0	0	1.64358	0	0	0	0	0	0	0	0	0	0	0	0	0	0	0	0	0	0	0	0
104.1/14.0 (5839)	104.106	14.05	5839	0	0	0	0	0	0	0	0	0	0	0	0	0	0	0	5.48578	0	0	0	0.233131	4.29203	0	4.6304	0	4.94518	0	0	0	0	0	0	0	0	0	0	0	0	0	0	0	0	0	0	0	0	0
104.1/1.0 (5845)	104.107	1.01	5845	754.62	999.458	977.426	1253.42	1007.81	1041.07	0	0	10.389	25.2961	0	32.9288	14.4904	0	31.348	1181.12	1037.69	0	12.032	0	20.1681	16.8285	18.3431	16.0197	33.505	10.3697	26.8561	1185.75	1223.88	1087.7	0	0	0	0	0	0	33.4158	58.1639	15.3829	0	11.54	0	0	0	0	0
105.1/2.9 (5874)	105.069	2.95	5874	0	0	0	237.253	0	67.6666	0	0	0	0	0	0	0	0	0	0	0	49.6709	0	2.13851	0	0	0	0	0	5.50164	0	0	0	43.0193	0	0	0	0	0	0	0	0	0	0	0	0	0	0	0	0
105.1/13.3 (5878)	105.069	13.27	5878	1.52667	0.423991	0	0	0	0	1.76064	0	0	2.54931	0.621373	1.14797	0	0	0	0	0	0	0	0	1.13654	0	2.1301	0	0	0	0	0	0	0	0.783734	0	1.8485	0	0	0	0	1.01643	1.63099	0	0	0	2.90137	0	1.95876	0
105.1/6.9 (5880)	105.07	6.88	5880	0	0	0	0	0	0	0	92.1106	97.7139	122.527	97.5719	97.8439	0	94.752	136.095	0	0	0	0	0	0	0	0	0	0	0	0	0	0	0	0	0	0	0	0	0	0	0	0	0	0	0	0	0	0	0
105.1/3.1 (5882)	105.07	3.08	5882	402.009	175.604	196.605	0	141.966	95.341	0	0	11.8479	5.98264	0	0	0	0	24.5277	245.86	180.912	0	66.8912	19.3532	27.778	22.7774	55.361	47.1924	21.8265	15.3991	64.3133	0	0	103.814	0	0	0	0	0	0	0	0	0	0	0	0	0	0	0	0
105.1/15.7 (5883)	105.07	15.65	5883	0	0	0	0	0	0	0	0	1.56756	0	0	1.73086	0	0	0.728463	0	0	0	0	0.951449	0	0.733238	1.91434	0	0	1.59468	0	0	0	0	4.10926	0	1.6323	0	0	0	1.32849	0	1.92548	0	0	0	0	0	0	0
105.1/14.3 (5885)	105.071	14.32	5885	2.65292	7.2227	3.77281	0	0	0	0	3.93343	6.4253	8.84713	3.21917	6.36717	9.6192	6.20723	11.0539	4.86853	5.58812	5.94791	4.46279	0	2.6807	6.81808	3.17231	1.55865	7.61815	0	5.08421	0	0	0	7.74689	1.25446	9.33201	9.65262	3.25229	6.132	9.60945	9.70675	5.29604	4.13069	0	0	6.9422	5.72851	7.3245	7.01859
105.1/3.0 (5887)	105.072	3.05	5887	0	0	0	0	0	0	1.27038	0	1.35658	0	0	1.07258	1.33854	0	0	0	0	71.5781	0	0	0	0	0	0	0	2.8344	0	0	0	0	0	0	0	0	0	0	0	0	0	0	0	0	0	0	0	0
106.0/1.2 (5894)	106.047	1.2	5894	5.12478	0	0	0	31.337	20.937	0	0	0	0	0	0	12.8426	0	0	0	0	0	2.72733	0	0	39.6613	0	0	24.1693	33.9492	27.5827	5.22725	0	34.1339	0	0	0	0	0	0	0	0	0	0	0	0	0	0	0	0
107.0/2.6 (5903)	107.048	2.63	5903	0	0	0	0	0	0	0	0	0	0	0	0	0	0	0	0	0	0	0.816435	177.714	0	0	0	0	0	210.249	0	0	0	265.032	0	0	0	0	0	0	0	0	0	0	0	0	0	0	0	0
107.0/1.2 (5904)	107.048	1.17	5904	0	83.5252	78.8047	153.009	86.025	132.516	55.71	0	0	42.5668	0	48.2189	40.9868	87.2974	0	0	97.262	0	0	65.5261	0	0	0	73.2625	0	9.3944	0	0	0	130.983	0	0	0	0	0	0	0	0	0	0	0	0	0	0	0	0
107.0/1.4 (5905)	107.048	1.41	5905	0	0	0	0	0	0	0	0	0	0	0	0	1.22474	0	0	0	0	0	0	0	0	143.801	0	0	0	0	82.6078	3.09653	0	0	0	0	0	0	0	0	0	0	0	0	0	0	0	0	0	0
107.0/1.7 (5906)	107.048	1.75	5906	224.404	0	0	0	0	0	0	0	0	1.264	0	0	0	0	94.5036	0	0	0	0	0	0	0	0	0	0	0	0	0	0	0	0	0	0	0	0	0	0	0	0	0	0	0	0	0	0	0
107.0/2.3 (5908)	107.049	2.33	5908	0	0	0	464.327	0	10.8566	0	0	12.0973	0	0	3.65287	0	0	14.6591	0	0	0	0	3.38999	0	0	0	0	0	0	0	0	0	0	0	0	0	0	0	0	0	0	0	0	0	0	0	0	0	0
107.0/2.6 (5909)	107.049	2.57	5909	0	0	11.4938	0	186.069	140.736	109.057	120.556	131.587	99.0121	113.999	78.7105	132.389	145.443	99.3178	293.52	2.64297	0	0	0	0	0	2.80559	2.48376	0	0	0	0	0	0	0	0	0	0	0	0	0	0	0	0	0	0	0	0	0	0
107.0/1.2 (5910)	107.049	1.21	5910	5.54928	0	0	0	0	0	0	52.3401	56.7494	0	50.632	0	0	0	10.1573	142.659	0	75.7058	0	0	78.8065	8.49361	79.4232	0	79.4234	40.6994	9.94462	161.567	7.00183	0	0	0	0	0	0	0	0	0	0	0	0	0	0	0	0	0
107.0/4.1 (5911)	107.049	4.11	5911	0	0	0	0	0	0	66.1896	71.2911	93.3055	32.0169	71.2267	89.2662	88.9943	74.6979	138.273	0	0	0	28.7297	8.21724	0	31.6831	0	21.8689	55.6445	7.51706	36.3545	0	0	0	0	0	0	0	0	0	17.1954	23.5843	10.8364	0	0	0	0	0	0	0
107.0/2.8 (5912)	107.049	2.82	5912	0	0	180.077	0	0	0	0	0	0	0	0	0	0	0	0	0	289.592	0	369.894	0	186.564	0	280.669	283.825	268.627	0	266.626	245.275	238.822	0	0	0	0	0	0	0	0	0	0	0	0	0	0	0	0	0
107.0/1.4 (5913)	107.05	1.43	5913	4.01489	0	0	0	0	0	0	0	0	0	0	0	0	0	0.602509	0	0	0	104.085	0	0	0	0	0	0	0	0	0	0	0	0	0	0	0	0	0	0	0	0	0	0	0	0	0	0	0
107.1/2.5 (5915)	107.051	2.48	5915	0	103.178	0	0	0	0	0	0	0	0	0	0	0	0	0	0	0	110.886	0	0	0	0	0	0	0	0	0	0	0	4.72893	0	0	0	0	0	0	0	0	0	0	0	0	0	0	0	0
108.0/1.0 (5919)	108.043	1.02	5919	0	0	0	0	0	0	0	0	0	0	0	0	0	0	0	0	0	0	0	0	0	0	0	0	0	0	0	0	0	0	0	0	0	0	0	0	6.77213	6.29464	7.14921	0	0	0	7.60856	1.71467	0	0
109.1/6.5 (5949)	109.1	6.51	5949	0	0	0	0	0	0	0	0.644974	0	0	0	0	0	0	0	0	0	0	0	0	0	0	0	0	0	0	0	0	0	0	0	0	0	0	0	0	0	1.27957	1.52219	0	0.887092	2.49762	0	0	0	0
109.1/7.9 (5954)	109.102	7.92	5954	0	24.149	0	0	18.6829	0	10.6111	23.0127	0	21.3095	32.2523	23.5565	0	17.5167	0	0	0	0	0	0.911038	0	0	0	0	0	21.796	0	0	0	19.9132	0	30.9149	0	11.2097	5.83933	16.9324	0	19.169	0	0	1.9482	0	17.8062	8.51068	0	0
110.0/1.3 (5965)	110.008	1.26	5965	3.36193	0	0	366.702	0	0	0	0.684819	2.52873	0	1.20291	0	77.1035	0	0	0	0	0	0	0	0	6.7992	0	0	2.58232	0	4.16223	4.49315	0	0	0	0	0	0	0	0	0.744788	0	0	0	0	0	0	0	0	0
110.0/1.3 (5970)	110.01	1.28	5970	0	0	2.26547	0	4.0497	0	0	0	0	487.6	0	0.601907	0	528.124	0	0	0	0	0	0	2.39113	0	0	0	0	0	0	0	0	0	0	0	0	0	0	0	0	0	0	0	0	0	0	0	0	0
110.0/3.7 (5972)	110.01	3.71	5972	0	0.860288	0	0	0	0	0	0	0	0	0	0	0	0	0	0	0	0	0	0	0	0	0	0	0	0	0	0	0	1.84554	0	0	0	0	0	0	0	0	0	1.27466	0	0	0	0	0	0
110.1/3.5 (5974)	110.059	3.55	5974	0	0	0	0	0	0	0	0	0	0	0	1.13136	0	0	0	0	0	0	0	0	2.01225	0	0	3.42119	1.46622	0	0	0	0	0	0	0	0	0	0	0	4.65972	0	0	0	1.92304	12.476	6.67526	0	5.90933	0
111.0/1.1 (5988)	111.007	1.08	5988	0	0	0	12.0276	0	0	0	0	0	0	0	0	0	0	0	0	0	4.6355	0	0	0	0	0	0	0	0	0	0	0	0	0	0	0	0	0	0	0	0	0	0	0	0	0	0	0	0
112.0/1.9 (5998)	112.007	1.89	5998	0	0	0	0	0	0	0	0	0	10.9975	0	0	1.4762	106	0	0	0	0	0	0	0	0	0	0	0	0	0	0	0	0	0	0	0	0	0	0	0	0	0	0	0	0	0	0	0	0
112.1/1.1 (6003)	112.05	1.06	6003	62.4518	80.2625	94.4815	164.38	0	114.589	87.3846	100.072	97.4883	89.2241	95.0935	97.2066	94.5478	141.269	129.639	340.475	323.043	0	142.634	117.745	150.985	128.47	125.594	90.9501	72.8155	157.118	87.7218	457.113	397.175	384.532	0	0	0	0	0	0	15.1708	18.6087	11.6897	0	0	0	0	0	0	0
113.0/3.9 (6013)	112.954	3.91	6013	0	0	0	0	0	0	0	3.18749	2.73658	0	0	0	0	0	1.88149	0	0	0	0	0	0	0	0	0	0	0	0	1.53265	0	0	0	0	0	0	0	0	0	0	0	0	0	0	9.56038	0	0	0
113.0/1.9 (6014)	112.954	1.87	6014	0	0	0	0	0	0	0	0	0	0	0	0	0	0	0.568198	0	0	0	2.50687	0	0	0	0	0	0	0	7.07811	0	0	0	0	0	0	0	0	0	0	0	0	0	0	0	0	0	0	0
113.0/3.4 (6016)	112.954	3.39	6016	0	5.8659	0	0	0	0	0	0	2.05853	0	2.53581	0	0	0	0	0	0	0	0	1.92999	0	0	0	0	0	0	0	0	0	0	0	0	0	0	0	0	0	0	0	0	0	0	0	0	0	0
113.0/3.7 (6019)	112.955	3.67	6019	0	0	0	0	0	0	0	0	1.74045	0	0	0	0	0	0	0	2.73118	0	0	0	0	0	0	4.58496	0	0	0	0	5.02764	0	0	0	0	0	0	0	0	0	0	0	0	0	7.09598	9.43401	0	0
113.0/4.3 (6032)	112.956	4.26	6032	0	0	0	0	0	0	0	0	0	1.35837	0	0	0	0	0	0	0	0	0	0	2.50757	0	0	2.59007	0	2.17785	0	0	0	0	0	0	0	0	0	0	0	0	0	0	0	0	0	0	0	0
113.0/12.3 (6033)	112.956	12.32	6033	1.52488	3.82618	0	0	0	0	0	0	0	0	0	0	0	0	0	0	0	0	4.08783	0	0	0.778403	0	0	0	0	0	0	2.77468	0	0	0	0	0	0	0	0	0	0	0.7673	0	0	0	0	0	0
113.0/11.5 (6036)	112.956	11.5	6036	0	0	2.44355	0	0	0	0	0	0	0	0	0	0	0	0	0	3.61402	0	0	0	0	0	0	1.60783	0	0	0	3.05029	0	0.709385	0	0	0	0	0	0	0	0	0	0	0	0	0	0	0	0
113.0/3.9 (6038)	112.957	3.92	6038	0	0	0	0	0	0	0	0	0	1.3463	0	0	0	0.982768	0	0	0	0	0	0	0	0	0	0	0	0	0	0	0	1.44699	0	0	0	0	0	0	0	0	0	0	0	0	0	0	3.16088	0
113.0/11.7 (6046)	112.957	11.71	6046	0	0	0	0	0	0	0	0	0	0	0	0	0	0	0	0	0	0	0	0	0	0	0	0	0	0	3.79091	0	2.04804	1.28209	0	0	0	0	0	0	0	0	0	0	0	0	0	0	0	0
113.0/1.4 (6055)	112.988	1.41	6055	0	0	0	0	0	0	0	0	0	67.1868	0	0	1.78948	27.4262	0	0	0	0	0	0	0	0	0	0	0	0	0	0	0	0	0	0	0	0	0	0	0	0	0	0	0	0	0	0	0	0
113.1/12.1 (6067)	113.061	12.06	6067	40.627	29.9355	32.5562	0	0	0	0	0	0	30.2127	0	47.9682	0	23.3847	24.425	26.2605	0	34.1986	16.2833	21.5205	0	15.9632	0	0	0	21.3358	14.7204	29.2989	12.8914	0	22.1903	0	39.4489	0	26.3675	23.8708	0	31.9828	39.1277	29.432	0	0	44.1856	36.3247	43.5949	30.8945
114.0/3.5 (6081)	113.963	3.47	6081	0	0	0	0	0	0	0	0	0	2.55259	0	0	0	0	0	0	3.04173	0	0	0	0	0	2.12608	0	2.79668	0	0	0	0	0	0	0	0	0	0	0	0	0	0	0	0	0	0	0	0	0
114.0/3.3 (6108)	114.036	3.31	6108	0	0	0	0	0	0	0	0	8.00647	0	0	0	0	0	0	0	0	0	0	1.53016	0	0	0	0	0	0	0	4.84677	0	0	0	0	0	0	0	0	0	12.3356	0	3.03357	5.18053	3.95584	0	10.517	0	0
114.0/3.8 (6109)	114.036	3.76	6109	0	0	0	0	0	0	68.8852	56.8683	87.6922	0	46.4468	52.0763	47.2965	46.0755	88.6633	28.0073	27.0796	0	43.9315	31.0844	38.2055	31.6018	33.6517	0	37.7404	38.3215	0	32.1584	42.2855	17.9749	0	0	0	0	0	0	117.463	77.7439	148.46	86.5534	69.331	69.2346	108.023	63.7067	101.01	160.383
114.0/6.8 (6115)	114.037	6.78	6115	0	0	0	0	0	0	0	0	0	0	0	0	0	29.9824	0	0	0	0	0	0	0	0	0	0	3.86763	0	0	0	0	0	0	0	0	0	0	0	0	0	0	0	9.14606	0	0	0	0	0
114.0/3.3 (6117)	114.037	3.29	6117	0	0	0	0	0	0	0	0	0	0	0	1.03343	0	0	0	0	0	0	0	0	0	0	0	0	0	0	0	5.78814	0	0	0	0	0	0	0	0	9.75437	0	0	1.40852	0	4.5637	21.5508	0	44.902	51.031
114.0/3.5 (6119)	114.037	3.53	6119	0	0	0	0	0	3.42167	60.8799	50.2536	56.2847	47.5728	61.8535	75.1833	39.6649	68.1664	96.0766	251.104	170.476	0	146.09	89.2	125.239	118.635	124.481	105.369	194.359	99.344	199.948	172.794	273.842	219.439	0	0	0	50.5616	20.8143	40.1323	335.662	313.964	345.081	203.138	215.273	223.093	324.57	229.341	180.784	199.929
114.0/9.2 (6118)	114.037	9.18	6118	0	0	0	557.465	647.732	547.993	199.573	174.478	213.514	220.866	206.332	254.924	191.424	136.595	265.097	499.283	354.381	431.779	127.178	380.921	449.243	401.108	428.233	436.613	477.092	306.625	444.651	409.884	395.488	261.274	0	0	0	709.142	676.709	595.239	174.379	182.062	208.16	0	0	0	0	0	0	22.1181
114.0/3.6 (6121)	114.038	3.58	6121	0	0	0	0	0	0	2.07832	0	0	2.28772	0	0	0	1.09269	1.13746	0	0	144.051	0	0	0	0	0	0	0	0	0	0	0	0	0	0	0	1.39902	0	0	0	0	0	0	4.25937	0	0	0	2.63837	0
114.1/12.9 (6126)	114.053	12.85	6126	29.63	0	0	5.80964	0	0	0	5.88312	12.6722	0	0	0	0	0	7.60408	0	13.9688	0	0	0	12.8158	0	28.8792	8.84508	0	0	0	0	0	0	0	0	0	0	1.66326	6.7124	0	0	0	0	5.54449	0	0	0	0	0
114.1/12.5 (6127)	114.053	12.51	6127	70.717	13.3028	0	0	0	0	0	0	8.99593	0	5.16806	15.5431	0	0	21.3742	0	35.7363	0	1.66009	0	0	17.7665	13.0819	10.7478	0	0	4.62419	0	0	0	16.5862	0	13.7705	0	15.2154	0	5.8471	12.5936	17.6732	28.1722	0	0	5.68019	7.963	8.28652	0
114.1/13.7 (6132)	114.054	13.73	6132	0	0	0	32.5457	0	0	0	0	0	0	0	0	0	0	0	0	0	0	0	0	0	0	0	0	0	65.518	0	0	39.1146	1.7976	0	0	0	0	0	0	0	0	0	0	0	0	0	0	0	0
114.1/1.4 (6138)	114.054	1.44	6138	0	0	0.725951	0	0	0	19.5835	14.015	27.7218	0	0	16.1181	28.5976	0	15.5325	0	0	0	0	0	0	0	0	0	0.798464	0	0	0	0	0	0	0	0	0	0	0	0	0	0	0	0	0	0	0	0	0
114.1/12.4 (6165)	114.057	12.42	6165	0	0	13.4132	0	0	0	0	0	0	0	0	0	0	0	0	0	0	0	0	4.78185	4.96888	0	0	0	0	0	0	3.18335	0	0	0	0	0	0	7.47639	0	0	0	0	0	0	0	0	0	0	0
114.1/1.5 (6182)	114.09	1.54	6182	1.80121	0	0	0	0	0	1.33044	0	1.51801	0	0	0	0	0	0	0	0	0	0	0	0	0	0	0	1.66545	0	0	0	0	0	0	0	0	0	0	0	0	0	0	0	0	0	0	0	0	0
114.1/3.9 (6194)	114.091	3.91	6194	0	0	0	0	0	0	0	386.753	504.817	416.982	346.478	322.802	364.042	0	503.812	460.376	398.042	0	156.124	171.241	113.826	246.544	151.594	202.098	132.422	124.808	110.936	394.665	393.855	255.84	0	0	0	0	0	0	368.205	383.411	548.55	2.7117	0	0	0	0	6.64433	78.7014
114.1/3.8 (6202)	114.093	3.85	6202	0	0	0	0	2.07595	0	345.701	0	0	0	0	0	0	329.185	0	0	0	359.913	0	0	0	0	0	0	0	0	0	0	0	0	0	0	0	0	0	0	0	0	0	0	1.70953	0	0	0	0	0
115.0/4.0 (6213)	114.971	3.98	6213	0	0	0	0	0	0	0	0	0	0	1.28364	2.46404	0	0	0	0	0	0	2.39304	0	0	2.93209	0	0	0	0	1.4842	0	0	0	0	0	0	0	0	0	0	0	0	0	0	0	0	0	0	0.638792
115.0/1.3 (6215)	114.988	1.26	6215	0	0	0	31.1597	0	0	0	0	0	50.814	0	0	0	16.6298	0	0	0	0	0	0	0	0	0	0	0	0	0	0	0	0	0	0	0	0	0	0	0	0	0	0	0	0	0	0	0	0
115.1/3.3 (6233)	115.053	3.33	6233	332.736	0	130.966	0	106.632	0	0	0	72.926	0	100.724	0	81.3129	0	166.805	159.216	142.118	0	107.712	108.03	112.193	105.51	119.737	149.851	116.147	132.073	95.6215	164.648	272.666	163.279	0	0	0	0	0	0	0	0	0	0	0	0	0	0	0	0
115.1/3.1 (6235)	115.054	3.07	6235	0	0	0	221.321	0	0	0	0	3.85032	2.70143	0	2.54745	3.56012	2.80064	0	72.0137	0	12.2196	97.5487	0	0	0	68.6975	0	71.737	0	113.715	76.3359	0	4.31106	0	0	0	0	0	0	0	0	0	0	0	0	0	0	0	0
115.1/2.7 (6236)	115.054	2.73	6236	0	0	31.5148	0	0	0	0	0	26.6124	0	0	12.6738	1.76109	46.4665	0	0	0	0	0	0	0	0	0	30.5426	0	0	0	0	0	0	0	0	0	0	0	0	0	0	0	0	0	0	0	0	0	0
115.1/3.2 (6239)	115.056	3.24	6239	0	0	0	0	0	0	0	0	0	84.7012	0	54.9629	0	0	0	0	6.21443	0	0	0	0	0	0	0	0	0	0	0	0	3.13854	0	0	0	0	0	0	0	0	0	0	0	0	0	0	0	0
115.1/14.5 (6245)	115.06	14.47	6245	0	0	0	0	0	1.31927	0	0	0	0	0	0	0	0	0	0	2.92881	0	0	1.94163	0	0	0	0	0	0	0	0	0	0	0	0	0	0	0	0	0	0	0	0	0	0	0	0	0	0
116.1/13.7 (6287)	116.053	13.66	6287	17.0474	28.9806	14.0654	13.2427	20.8841	13.8036	28.5552	31.7563	33.0917	27.5044	29.8229	28.1244	27.0286	22.0794	20.5327	23.2192	21.5476	0	8.64416	23.7165	17.9042	8.31715	23.0317	24.2058	16.6114	0	9.29306	19.5952	18.7121	0	11.4816	29.2838	25.9198	28.6582	19.629	21.1366	23.303	21.8713	26.018	21.6866	22.1623	23.972	25.3967	27.8688	29.0911	29.4095
116.1/3.2 (6288)	116.055	3.17	6288	38.914	3.33807	0	24.6914	0	0	0	0	0	0.396187	0	0	0	0	2.53768	0	1.09866	0	0	0	0	9.91548	0	0	0	0	0	0	0	0	0	0	0	0	0	0	0	0	0	0	0	0	0	0	0	0
116.1/3.8 (6323)	116.07	3.81	6323	0	0	0	3.98827	0	0	0	0	0	0	0	0	0	3.19548	0	0	0	0	34.388	0	0	0	0	0	0	0	62.8825	0	0	0	0	0	0	0	0	0	0	0	0	0	0	0	0	0	0	0
116.1/5.8 (6326)	116.07	5.76	6326	148.739	106.312	75.3771	79.4107	60.9532	41.1236	92.0312	60.623	95.4018	0	68.6672	71.8603	37.561	56.2572	156.273	173.347	102.579	0	110.388	33.2025	100.052	107.934	132.069	100.344	128.477	43.9897	104.61	120.788	136.82	40.2774	0	0	0	1.1201	0	0	0	0	0	0	0	0	0	0	0	0.977966
116.1/1.0 (6334)	116.071	1.02	6334	15379	15625.9	15438.1	8044.28	14782.3	14420.5	6187.41	7282.24	7328.6	8130.68	8013.09	7189.83	7490.22	7224.66	8392.47	14831.3	14288.3	0	12065.3	12116	11656.8	13557.3	13243.5	12961	10614.2	12744.4	8978.97	15972.7	12982.5	12151.3	9.72795	0	1.49432	3.07154	0	5.34779	0	0	0	0	2.18233	0	0	0	0	6.34841
116.1/5.8 (6350)	116.072	5.76	6350	0	0	0	0	0	0	0	5.65364	0	54.392	0	0	0	0	0	0	0	98.8464	0	0	0	0	0	0	0	0	0	0	0	0	0	0	0	0	0	0	0	0	0	0	0	0	0	0	0	0
117.1/2.9 (6369)	117.055	2.89	6369	0	0	0	0	0	0	0	0	0	0	0	0	0	0	0	0	0	0	9.1359	0	69.8951	0	19.2763	0	0	0	0	25.8237	9.93415	0	0	0	0	0	0	0	0	0	0	0	0	0	0	0	0	0
117.1/1.9 (6378)	117.058	1.94	6378	0	0	0	0	0	0	0	0	0	8.47885	0	0	0	0	0	0.349009	0	0	0	0	0	0	0	0	0	13.0106	0	0	0	0.443706	0	0	0	0	0	0	0	0	0	0	0	0	0	0	0	0
117.1/13.9 (6382)	117.07	13.89	6382	0	0	0	0	0	0.830937	0	0	0	0	0	0	0	0.85744	0	0	0	1.45569	0	0	0	0	0	0	0	0	0	0	0	0	0	0	0	0	0	0	0	0	0	0	0	0	0	0	0	1.70191
118.0/1.3 (6403)	117.992	1.26	6403	0	0	0	0	0	0	0	0	0	16.6924	0	0	1.48923	0.579657	0	0	0	0	0	0	0	0	0	0	0	0	0	0	0	0	0	0	0	0	0	0	0	0	0	0	0	0	0	0	0	0
118.1/3.0 (6404)	118.062	3	6404	0	0	0	0	0	0	4.77252	0	0	0	0	0	0	0	0	0	0	0	0	4.25444	0	0	0	0	0	3.154	0	0	0	0	0	0	0	0	0	0	0	0	0	0	0	0	0	0	0	0
118.1/2.6 (6405)	118.063	2.61	6405	0	0	0	0	0	0	0	0	0	0	0	0	0	0	0	48.2374	0	0	0	0	0	0	0	0	0	49.301	98.4184	0	0	0	0	0	0	0	0	0	0	0	0	0	0	0	0	0	0	0
118.1/6.4 (6406)	118.063	6.39	6406	0	0	0	0	0	0	0	0	0	0	0	0	0	0	0	0	0	0	0	0	0	0	0	0	0	0	0	0	0	0	0	0	0	0	0	0	0	24.0345	0	19.9974	0	0	28.804	12.1043	0	0
118.1/1.7 (6407)	118.064	1.74	6407	88.3695	0	0	0	0	0	0	0	0	1.91384	0	0	0	0	31.4762	0	0	0	0	16.2377	0	0	0	0	0	0	0	0	10.1022	0	0	0	0	0	0	0	0	0	0	0	0	0	0	0	0	0
118.1/1.4 (6409)	118.064	1.4	6409	5.3044	0	0	30.3318	0	0	1.4528	2.88426	0	0	0	3.25729	8.36163	0	9.35559	0	0	0	53.9754	0	0	54.7724	9.20369	0	9.77664	7.10298	32.3734	6.73015	11.4273	0	0	0	0	0	0	0	0	0	0	0	0	0	0	0	0	0
118.1/1.2 (6410)	118.064	1.15	6410	5.51901	39.1117	42.3215	72.2834	41.1342	54.4097	0	19.1829	29.9528	0	9.22976	0	13.866	32.424	15.9408	66.6431	39.9329	40.7848	26.0419	0	37.612	19.6451	41.0458	33.6746	37.7669	24.8175	15.2301	61.9946	18.7027	38.8947	0	0	0	0	0	0	0	0	0	0	0	0	0	0	0	0
118.1/3.1 (6411)	118.064	3.09	6411	1.04178	18.1951	0	1289.7	0	0	0	0	20.4823	0	0	0	0	0	0	469.278	0	3.9045	506.151	0	0	84.7913	238.574	0	460.679	0	629.386	267.561	0	0	0	0	0	0	0	0	0	0	0	0	0	0	0	0	0	0
118.1/2.2 (6412)	118.065	2.17	6412	0	0	0	0	61.7846	96.9679	0.697026	2.75242	0	0	0	0	0	1.17962	0	0	0	0	0	0	0	0	0	0	0	0	0	0	0	80.2117	0	0	0	0	0	0	0	0	0	0	0	0	0	0	0	0
118.1/2.7 (6414)	118.065	2.71	6414	0	0	254.714	0	0	0	0	0	70.819	0	0	0	0	304.254	0	0	0	0	0	138.956	102.835	0	23.7645	250.863	96.6742	0	0	0	0	0	0	0	0	0	0	0	0	0	0	0	0	0	0	0	0	0
118.1/3.2 (6416)	118.065	3.24	6416	1904.49	745.935	816.068	0	847.848	995.906	498.319	521.346	510.646	513.239	549.543	458.738	539.688	607.154	1088.92	894.664	1051.46	0	707.454	683.955	668.517	712.666	779.326	905.212	782.579	829.888	595.179	1038.64	1740.9	1033.54	0	0	0	0	0	0	0	0	0	0	0	0	0	0	0	0
118.1/2.5 (6417)	118.065	2.47	6417	7.43863	179.811	0	0	102.229	14.5556	206.053	93.7553	73.9318	0	125.015	121.503	104.779	1.60926	0	47.0855	0	0	0	0	0	0	0	0	0	0	0	0	0	94.3499	0	0	0	0	0	0	0	0	0	0	0	0	0	0	0	0
118.1/2.4 (6418)	118.066	2.36	6418	0	12.8394	0	0	2.89558	68.1949	0	0	0	0	0	3.28015	0	0	0	0	0	246.644	0	0	0	0	0	0	0	0	0	0	0	0	0	0	0	0	0	0	0	0	0	0	0	0	0	0	0	0
118.1/6.4 (6420)	118.067	6.38	6420	10.4012	3.81406	4.26169	0	0.811457	0	41.7783	31.7828	42.4774	69.4033	45.0154	49.7345	50.4367	51.0269	71.4983	1.80136	0	0	0	0	0	1.4456	0	0.829617	3.99348	0	0	4.19823	7.15959	0	0	0	0	0	0	0	25.0676	0	28.6596	0	15.8906	24.0116	0	0	15.3958	0
118.1/1.1 (6432)	118.085	1.14	6432	0	0	0	0	0	0	0	39.2637	0	0	0	0	0	0	0	0	0	0	0	0	0	0	0	0	0	0	0	0	0	0	0	0	0	0	0	0	35.4011	28.3175	15.8873	31.6237	0	28.7262	33.3894	38.7585	15.7087	0
118.1/3.4 (6446)	118.086	3.4	6446	14.7875	0	0	0	5.58792	0	0	16.3671	0	8.50838	0	16.1398	20	0	0	9.65201	5.99725	12.4302	0	0	9.92967	0	8.7489	12.3799	9.13587	7.89547	13.4332	0	0	7.07329	0	0	0	0	0	0	0	0	0	0	0	0	0	0	0	0
118.1/1.1 (6449)	118.086	1.07	6449	5230.01	5005.96	5427.6	3075.3	5462.03	5196.78	2308.78	2154.82	2232.04	2106.21	2156.38	2088	1966.36	2521.88	2686.2	5580.61	5883.49	0	3107.54	2937.85	2791.99	2986.79	3404.13	3290.58	3228.36	3060.95	2746.58	5533.75	5352.95	5158.02	103.648	114.987	109.641	99.6454	104.455	103.125	114.414	143.174	100.268	93.1673	100.178	82.0585	53.7048	89.7118	90.1004	101.3
118.1/1.8 (6457)	118.087	1.84	6457	0	0	0	0	0	0	5.89061	0	0	10.4528	3.94647	0	0	0	0	0	0	0	0	0	0	0	0	0	0	0	0	0	0	0	0	0	0	0	0	0	0	0	0	0	0	0	0	0	0	0
118.1/1.1 (6466)	118.088	1.07	6466	0	0	0	0	0	0	0	0	0	58.1913	56.9117	0	0	0	0	0	0	5042.19	0	0	0	0	0	0	0	0	0	0	0	0	0	0	0	0	0	0	0	0	0	0	38.3373	0	0	0	0	0
118.1/3.9 (6472)	118.089	3.85	6472	0	0	0	0	0	0	0	0	0	0	0	0	1.58016	0	0	0	0	0	0	0	0	0	0	0	0	0	0	0	0	0	0	0	0	0	0	0	0	0	0	0	2.92384	0	0	0	0	0
118.1/3.9 (6479)	118.093	3.9	6479	0	0	0	0	0	0	0	0	1.70687	0	0	0	0	1.33624	0	0	0	0	0	0	0.462545	0	0	0	0	0	0	0	0	0	0	0	0	0	0	0	0	0	0	4.11916	0	0	0	0	0	0
119.0/1.1 (6487)	119.049	1.14	6487	660.463	555.204	475.395	813.745	661.175	581.348	509.491	474.177	466.032	495.657	488.907	506.337	456.167	525.87	581.193	658.142	479.805	482.648	649.031	656.107	492.1	669.329	486.241	543.392	726.129	433.192	644.169	754.043	789.273	639.931	0	0	0	0	0	0	0	0	0	0	0	0	0	0	0	0
119.0/1.4 (6488)	119.049	1.41	6488	55.5082	145.738	226.034	460.31	83.0687	179.525	116.617	113.826	162.197	83.7444	165.498	64.4645	259.818	150.048	171.986	504.938	352.268	0	503.745	94.0849	199.09	258.681	292.651	359.138	396.298	130.426	281.995	349.92	140.054	366.823	0	0	0	0	0	0	0	0	0	0	0	0	0	0	0	0
119.1/1.5 (6496)	119.072	1.53	6496	0	0	0	0	0	0	0	0	0	0	0	0	0	0	2.76053	0	0	0	0	0	0	4.9318	0	0	0	0	0	0	27.47	0	0	0	0	0	0	0	0	0	0	0	0	0	0	0	0	0
119.7/1.7 (6512)	119.715	1.75	6512	164.884	0	0	0	0	0	0	0	0	0	0	0.670744	0	0	70.6063	0	0	0	0	0	0	0	0	0	0	0	0	0	0	0	0	0	0	0	0	0	0	0	0	0	0	0	0	0	0	0
119.7/1.4 (6515)	119.716	1.44	6515	0	0	0	0	0	0	0	0	0	0	0	0	0	0	0	0	0	0	75.7736	0	0	138.737	0	0	0	2.76355	0	0	0	0	0	0	0	0	0	0	0	0	0	0	0	0	0	0	0	0
119.7/2.5 (6516)	119.716	2.55	6516	0	0	0	0	0	109.25	0	60.9725	121.175	0	83.4773	62.8564	0	132.283	7.55939	249.244	0	0	0	0	0	0	0	0	0	161.651	0	0	0	0	0	0	0	0	0	0	0	0	0	0	0	0	0	0	0	0
119.7/2.8 (6518)	119.716	2.77	6518	0	0	180.009	0	171.757	0	0	0	0	0	0	0	0	0	0	0	230.986	0	279.645	121.633	146.777	0	214.365	239.364	216.989	0	222.034	200.22	174.29	229.963	0	0	0	0	0	0	0	0	0	0	0	0	0	0	0	0
119.7/2.3 (6519)	119.716	2.34	6519	0	43.259	0	428.249	0	0	5.37436	8.57992	0	0	12.0844	0	0	1.52433	0	0	0	0	0	0	0	0	0	0	0	0	0	0	0	2.52639	0	0	0	0	0	0	0	0	0	0	0	0	0	0	0	0
119.7/2.4 (6520)	119.718	2.44	6520	0	43.995	0	0	0	0	82.0539	0	0	0	6.51339	0	0.771786	1.78484	0	4.86944	1.70993	129.045	0	0	0	0	0	0	0	0	0	0	0	0	0	0	0	0	0	0	0	0	0	0	0	0	0	0	0	0
119.7/2.7 (6524)	119.739	2.69	6524	0	0	0	0	2.91494	0	0	0	0	0	0	0	1.75906	0	0	0	0	0	0	0	4.52798	0	0	0	0	0	0	0	0	0	0	0	0	0	0	0	0	0	0	0	0	0	0	0	0	0
120.0/5.2 (6527)	120.044	5.21	6527	0	0	0	0	1.48967	0	0	0	0	0	0	0	0	0	0	4.91234	3.55345	0	0	0	0	0	0	0	0	0	0	1.98929	0	0	0	0	0	0	0	0	53.4506	44.6782	44.1756	0	0	0	0	0	0	0
120.1/1.5 (6530)	120.052	1.46	6530	0	0	12.7861	0	0	0	0	11.1654	6.60088	0	16.6684	0	23.4177	0	18.591	0	30.1335	0	0	5.99221	0	0	31.7984	0	7.15942	2.20823	0	0	10.3655	35.3006	0	0	0	0	0	0	0	0	0	0	0	0	0	0	0	0
120.1/2.1 (6545)	120.078	2.07	6545	0	0	31.6102	0	0	0	0	0	0	9.57902	0	0	34.8845	0	0	44.3273	64.5925	0	0	0	0	0	0	0	0	0	0	58.4347	0	0	0	0	0	0	0	0	0	0	0	0	0	0	0	0	0	0
120.1/7.8 (6547)	120.079	7.8	6547	0	0	0	0	0	0	0	0	0	0	0	0	0	0	0	0	0	0	0	0	0	0	0	0	0	1.68205	0	0	0	0	0	0	0	0	0	0	0	0	0	0	6.52943	3.62399	30.581	2.62345	0	0
120.1/3.5 (6552)	120.079	3.54	6552	0	0	8.25567	0	0	0	0	0	4.18937	0	0	4.74797	0	0	0	0	0	0	0	0	0	0	28.8936	0	43.5538	0	0	14.0621	0	0	0	0	0	0	0	12.3871	0	0	0	55.3941	67.1605	0	96.1438	48.322	0	0
120.1/4.1 (6559)	120.08	4.06	6559	0	0	26.1594	0	0	0	0	0	0	4.96174	0	0	0	0	0	0	4.30294	0	0	0	0	0	0	17.6296	0	0	0	0	0	0	0	0	0	0	0	0	0	0	0	0	0	0	0	0	0	0
120.1/5.4 (6562)	120.08	5.36	6562	0	0	0	0	0	0	0	6.22234	0	0	0	11.0651	2.34474	0	0	0	0	0	10.2235	0	4.5551	13.6238	0	0	0	0	47.582	0	0	0	0	0	0	0	0	0	0	0	0	0	0	0	0	0	0	0
120.1/5.5 (6565)	120.081	5.5	6565	118.614	60.9504	57.0901	128.502	60.4989	51.7481	0	28.7477	67.946	44.184	0	16.9955	39.7085	36.8123	105.532	34.5221	14.342	0	19.6161	10.1032	0	23.6061	0	0	42.9377	20.2147	0	13.4469	30.4559	0	0	0	0	0	0	0	0	0	0	0	0	0	0	0	0	0
120.1/6.0 (6567)	120.081	5.96	6567	24.7558	15.958	0	0	0	0	0	50.2268	66.5702	28.8495	60.6139	65.2203	36.2312	0	102.994	0	20.7951	0	0	13.8404	41.0511	50.6104	50.7437	45.7782	44.9025	0	0	18.0306	30.7173	14.6521	0	0	0	0	0	0	0	0	0	0	0	0	0	0	0	0
120.1/1.2 (6571)	120.081	1.16	6571	42.9435	7325.16	7887.42	13163.4	7813.19	12878.2	5166.85	4726.51	5455.85	3963.81	4877.78	4629.79	4615.83	8125.3	7.78599	13226.7	9381.97	0	0	5556.01	7386.66	0	9049.9	7438.18	8083.78	5101.91	0	13786.7	68.9703	12115.3	0	2.26401	0	1.4418	3.18928	2.65882	3.85418	7.18659	3.35015	8.79714	7.17213	4.99678	8.76137	6.16183	4.33275	2.03429
120.1/2.3 (6574)	120.081	2.33	6574	0	0	0	23370	0	0	0	0	0	0	0	0	0	0	0	0	0	0	0	0	0	0	0	0	0	409.681	0	0	0	0	0	0	0	0	0	0	0	0	0	0	0	0	0	0	0.894647	0
120.1/2.7 (6575)	120.081	2.67	6575	648.689	0	11906.8	120.098	12679	0	0	0	0	0	0	0	11426.8	11741.5	0	13647.7	17116.6	0	0	12090.6	13032.6	0	17478.7	0	0	14473.1	18102.8	0	0	16303.4	0	0	0	0	0	0	0	0	0	0	0	0	0	0	3.05686	0
120.1/5.8 (6576)	120.081	5.81	6576	0	7.69952	2.88594	0	0	7.53578	34.2065	0	0	0	0	0	3.90247	63.4478	0	0	0	0	44.042	0	0	0	0	0	0	22.4322	48.0498	0	0	0	0	0.262678	0	0	0	0	0	0	0	0	0	0	0	0	0	0
120.1/1.4 (6580)	120.081	1.4	6580	3.51657	0	0	0	0	0	0	0	0	0	0	0	0	0	0	0	0	0	10339.3	0	0	14110.6	0	0	0	0	9387.85	0	0	0	0	0	0	0	0	0	0	0	0	0	0	0	0	0	0	0
120.1/1.8 (6578)	120.081	1.76	6578	17778.1	39.4853	0	0	0	0	0	0	0	0	0	0	0	0	9168.86	0	0	0	0	0	0	0	0	0	0	0	760.642	0	0	0	0	0	0	0	0	0	0	0	0	0	0	0	0	0	0	0
120.1/2.5 (6581)	120.081	2.52	6581	0	8755.37	144.505	0	0	9219.04	9789.53	9692.23	10293.1	9363.75	10062.3	6114.9	0	0	7501.45	0	0	10097.7	0	0	0	0	40.6867	0	0	0	0	0	0	0	0	0	0	0	0	0	1.0187	0	1.45185	0	0	2.62655	0	0	0	0
120.1/4.0 (6579)	120.081	4.01	6579	53.3899	23.4659	0	0	22.944	15.8608	0	0	0	0	0	0	10.7212	0	0	0	0	3.67093	13.0741	0	6.18761	0	0	0	0	0	12.6737	0	0	12.7832	0	0	0	0	0	0	0	0	0	0	0	0	0	0	0	0
120.1/3.0 (6582)	120.081	3.01	6582	200.432	0	155.031	0	111.473	0	0	0	0	0	0	0	0	0	66.8295	0	0	0	0	0	0	12307.7	0	0	0	0	0	0	0	0	0	0	0	0	0	0	0	0	0	0	0	0	0	0	0	0
120.1/2.8 (6586)	120.081	2.8	6586	0	155.177	0	0	0	0	0	0	0	0	0	0	0	0	0	0	0	0	22254.2	0	0	0	0	18177.1	16868.8	0	0	12864.8	9461.85	0	0	0	0	0	0	0	0	0	0.916211	0	0	0	0	0	0	0
120.7/2.8 (6602)	120.716	2.78	6602	0	0	4.89137	0	0	0	0	0	0	0	0	0	0	0	0	0	0	0	27.7118	0	0	0	17.3876	0	0	0	26.959	18.4593	13.5468	0	0	0	0	0	0	0	0	0	0	0	0	0	0	0	0	0
121.0/1.2 (6608)	120.953	1.24	6608	0	0	4.07016	172.733	0	2.92741	0	0	0	0	0	0	14.3835	0	0	0	0	0	0	0.825978	0	0	0	0	0	0	0	0	12.0274	18.599	0	0	0	0	0	0	0	0	0	0	0	0	0	0	0	0
121.0/1.3 (6610)	120.955	1.26	6610	0	0	0	0	0	0	0	0	0	48.5201	0	1.2188	0	24.8919	0	0	0	0	0	0	0	0	0	0	0	0	0	0	0	0	0	0	0	0	0	0	0	0	0	0	0	0	0	0	0	0
121.0/2.4 (6618)	121.038	2.38	6618	0	0	0	2.27704	0	0	0	0	0	1.52689	0	0	0	0	0	0	0.774404	0	0	0	0	0	0	0	0	0	0	0	0	0	0	0	0	0	0	0	0	0	0	0	0	0	0	0	0	0
121.0/1.1 (6621)	121.039	1.11	6621	0	0	0	0	0	0	0	0	0	0	0	0	0	0	0	0	0	0	0	0	0	0	0	0	0	0	0	0	0	0	8.61984	11.7727	12.9946	5.07181	2.71103	11.0993	1.98727	0	2.83958	2.55183	0.504773	0	0	0	2.17753	6.44153
121.1/4.8 (6630)	121.064	4.79	6630	0	0	0	0	0	0	0	0	0	0	0	0	0	0	0	0	0	0	0	0	0	0	0	0	0	0	0	0	0	0	0	0	0	0	0	0	4.55998	6.90237	26.6033	2.52684	0	8.90875	0	0	0	0
121.1/6.3 (6632)	121.064	6.31	6632	0	0	0	0	0	0	0	0	0	0	0.258472	0	0	0	0	0	0	0	0	0	0	0	0	0	0	0	0	0	0	0	0	0	0	0	0	0	1.28951	9.53848	41.324	0	0	11.3676	0	0	0	0
121.1/1.4 (6633)	121.064	1.41	6633	180.957	61.0548	201.09	267.034	98.2041	164.832	16.8567	23.886	33.2703	14.0714	34.5328	13.1617	50.0736	35.3947	85.8535	174.222	142.331	30.3872	181.178	21.72	53.5907	143.534	73.5925	107.564	87.1129	61.0033	155.982	206.782	423.089	303.501	0	0	0	0	0	0	0	0	0	0	0	0	0	0.401253	0	0
121.1/4.2 (6634)	121.065	4.24	6634	5.92903	0	0	0	0	0	253.524	280.504	382.132	398.955	308.436	320.834	313.217	329.404	435.9	337.164	494.229	0	0	0	0	35.4627	18.7506	17.1875	0	0	0	4.97527	3.93936	0	0	0	0	0	0.355404	0	0	0	0	0	0	0	0	0	0	0
121.1/1.2 (6635)	121.065	1.16	6635	392.138	300.814	242.744	355.158	323.91	280.821	145.036	158.679	103.963	134.093	125.809	120.002	0	139.534	145.136	276.103	220.566	0	160.003	194.354	0	143.317	147.652	147.591	122.07	155.944	153.469	292.952	317.047	281.879	0	0	0	0	0	0	0	0	0	0	0	0	0	0	0	0
121.1/14.4 (6637)	121.065	14.35	6637	8.35361	0	0	0	4.91764	0	5.72518	0	0	3.73828	10.8493	5.26252	0	0	6.05034	0	0	3.94324	5.44549	0	0	1.94788	0	0	0	0	4.98383	0	0	0	6.86258	0	11.2526	0	9.01374	0	0	2.02164	6.77834	0	0	0	2.07746	8.13445	0	0
121.1/2.0 (6639)	121.082	1.98	6639	0	0	0	0	6.58687	15.0024	0	0	0	0	0	0	3.1207	0	0	0	20.0234	0	0	5.91792	7.54946	0	8.2408	8.18496	0	7.33593	0	21.4534	0	31.0149	0	0	0	0	0	0	0	0	0	0	0	0	0	0	0	0
121.1/1.9 (6646)	121.084	1.86	6646	0	0	117.176	0	19.2013	6.40133	0	0.961265	15.7074	0	11.9643	0	0	0	0	30.8552	0	0	0	0	27.9807	0	0	0	0	0	0	0	0	0	0	0	0	0	0	0	0	0	0	0	0	0	0	0	0	0
122.0/14.4 (6663)	121.968	14.44	6663	0	0	1.71451	0	0	0	0	0	0	0	0	0	0	0	0	0	0	0	0	0	0	0	2.68055	0	0	0	0	0	4.56922	0	2.0706	0	0	0	0	0	0	1.58546	0	0	0	0	0	0	0	0
122.0/1.4 (6665)	121.99	1.39	6665	0	0	0	0	0	0	0	0	0	0	0	0	0	0	0	0	0	0	0	0	0	0	0	0	0	1.62318	0	4.21463	1.88435	0	0	0	0	0	0	0	0	0	0	0	0	0	0	0	0	0
122.0/1.2 (6671)	122.024	1.18	6671	0	0	0	0	0	0	1894.15	1527.44	1711.82	378.557	1350.64	1322.13	954.015	1206.44	0	0	0	0	0	0	0	0	0	0	0	0	0	0	0	0	0	0	0	0	0	0	0	0	0	0	0	0	0	0	0	0
122.0/2.3 (6672)	122.024	2.28	6672	0	0	0	0	0	0	901.599	799.985	837.199	0	873.384	529.289	0	0	584.238	0	0	0	0	0	0	0	0	0	0	0	0	0	0	0	0	0	0	0	0	0	0	0	0	0	0	0	0	0	0	0
122.1/1.5 (6677)	122.066	1.45	6677	15.1746	0	0	42.4447	7.32963	0	0	0	1.18601	0	1.86481	0	0	0	0	18.8098	10.5948	0	13.9268	1.60091	0	14.8836	0	7.35434	0	0	12.704	16.1365	39.8429	18.2301	0	0	0	0	0	0	0	0	0	0	0	0	0	0	0	0
122.1/1.1 (6692)	122.094	1.11	6692	0	0	0	0	0	0	0	0	0	0	0	0	0	0	0	0	0	0	0	0	0	0	0	0	0	0	0	0	0	0	0	0	0	0	0	0	0	0	6.27159	0	0	3.87391	0	3.14792	0	0
122.1/3.1 (6698)	122.095	3.09	6698	77.4025	0	28.9141	0	4.93665	0	0	0	0	0	0	0	0	0	0	23.9584	0	0	0	2.12485	0	0	0	0	0	0	4.93768	0	0	22.2445	0	0	0	0	0	0	0	0	0	0	0	0	0	0	0	0
122.1/1.1 (6702)	122.096	1.11	6702	0	0	0	0	0	0	0	0	0	0	0	0	0	0	0	0	0	0	0	0	0	0	0	0	0	0	0	0	0	0	6.75944	8.81009	13.0206	6.7835	9.70162	9.64424	4.74575	2.84047	0	2.92629	2.95277	0	3.01377	0	5.31762	11.749
123.0/1.1 (6750)	123.044	1.14	6750	1462.43	1210.88	1160.6	2016.29	1398.1	1365.04	1093.86	996.938	956.353	1025.45	1017.96	1040.16	963.593	1188.6	1121.73	1482.62	968.49	1031.59	1303.81	1298.94	1009.55	1358.55	968.577	1019.14	1372.31	861.472	1254.73	1574.3	1951.55	1430.5	0	0	0.368786	0	0	0	0	0	0	0	0	0	0	0	0	0
123.0/1.4 (6753)	123.044	1.41	6753	96.3396	238.344	411.694	0	137.281	302.879	240.675	230.893	256.419	163.216	317.826	134.131	527.196	302.976	335.284	882.651	667.045	75.9624	942.276	174.247	382.115	507.385	628.875	708.567	897.872	237.392	593.251	661.78	183.555	660.248	0	0	0	0	0	0	0	0	0	0	0	0	0	0	0	0
123.1/1.0 (6758)	123.056	1.02	6758	0	0	0	0	0	0	0	0	4.5376	0	0	6.45523	3.78278	9.65467	0	0	0	0	0	0	0	0	0	0	0	0	0	0	0	0	0	0	0	0	0	0	0	0	0	0	0	0	0	0	2.6192	0
124.0/1.1 (6767)	124.039	1.1	6767	0	0	0	0	0	0	19.8579	15.7361	0	21.1348	22.5968	28.4418	0	0	0	0	0	3.61118	0	0	0	0	0	0	0	0	0	0	0	0	0	0	0	0	0	0	0	22.6938	0	0	10.436	0	0	0	0	0
124.1/1.1 (6775)	124.075	1.11	6775	0	0	0	0	0	0	0	0	0	0	0	0	0	0	0	0	0	0	0	0	0	0	0	0	0	0	0	0	0	0	0	0	0	0	0	0	4.80718	7.34839	8.58512	0	0	0	0	0	0	0
124.1/14.5 (6782)	124.086	14.53	6782	7.41146	0	0	0	0	0	0	0	0	0	2.35965	0	0	0	3.63517	0	0	0	0	0	0	0	0	0	0	0	0	0	0	0	0	0	0	0	0	0	0	0	1.67557	0	0	0	0	0	0	0
125.0/12.8 (6796)	124.962	12.82	6796	0	0	0	5.66516	0	0	0	0	7.21819	0	0	0	0	0	0	0	0	0	0	6.87059	0	0	0	0	0	0	0	0	0	0	0	0	0	0	0	0	0	0	0	0	0	0	0	0	0	0
126.1/3.6 (6843)	126.055	3.63	6843	0	0	0	0	0	0	0	2.6421	8.61087	4.38855	7.51832	0	5.09518	0	22.0849	52.9274	0	30.0729	19.8414	0	0	16.76	22.9734	0	24.3916	0	39.919	22.6356	0	0	0	0	0	0	1.86038	0	0	0	20.7139	0	0	0	0	0	44.9519	39.6516
127.0/13.6 (6856)	126.959	13.62	6856	0	0	0	1.6586	1.82698	0.534385	0	0	0	0	0	0	2.12698	3.6464	0	0	0	0	0	0	0	0	0	0	1.36321	0	0	0	5.33678	0	0	0	0	0	0	0	0	0	0	0	0	0	0	0	0	0
127.0/3.6 (6878)	127.038	3.55	6878	0	0	0	0	0	0	0	0	0	0	0	0	0	0	0	0	0	0	0	4.70795	10.5379	0	0	58.4729	0	0	0	103.347	191.925	106.273	0	0	0	0	0	0	0	0	0	0	0	0	0	0	0	0
127.0/3.7 (6880)	127.038	3.67	6880	0	0	0	0	0	0	0	0	0	0	0	0	0	0	0	0	0	0	0	0	0	84.3249	69.9473	0	81.0782	0	0	0	0	0	0	0	0	0	0	0	0	0	0	0	0	0	0	0	0	0
127.0/3.4 (6884)	127.039	3.37	6884	143.13	69.3713	0	77.0581	0	89.7859	85.0603	70.8486	138.36	0	87.6212	84.9118	120.019	85.2003	139.618	0	0	0	0	0	0	0	0	0	0	38.8946	88.6291	0	0	0	0	0	0	15.4388	8.43843	15.7027	449.753	437.501	415.169	371.074	388.78	493.606	734.355	421.967	516.445	547.259
127.1/12.8 (6900)	127.076	12.78	6900	76.1253	57.9623	0	0	55.1176	0	70.126	70.4655	0	59.7022	86.6955	61.6999	59.9446	43.7698	42.6648	61.3052	47.5992	0	16.9438	0	0	13.7976	61.7706	0	0	0	22.6153	0	18.8578	42.6109	67.6674	82.6378	69.3347	69.0953	61.1573	71.1653	0	60.5444	0	60.7417	64.9682	0	1.10988	80.3533	0	56.3996
128.0/1.2 (6904)	128.018	1.23	6904	0	0	0	9.27463	0	0	0	0	0	17.6782	0	0	0	5.01762	0	0	0	0	0	0	0	0	0	0	0	0	0	0	0	0	0	0	0	0	0	0	0	0	0	0	0	0	0	0	0	0
128.1/6.8 (6911)	128.053	6.76	6911	0	0	0	0	0	0	26.5987	0	0	29.3688	15.2174	17.1293	0	12.2384	11.5267	6.49067	19.8388	16.114	4.43983	14.9174	10.7991	16.3758	2.60635	20.0983	8.40081	0	0	5.71224	0	5.63058	0	0	0	0	0	0	10.8314	19.9336	5.36421	0	13.7216	0	15.3473	13.117	13.3016	24.9773
128.1/3.8 (6914)	128.068	3.82	6914	0	0	0	0	0	0	0	0	0	0	0	0	0	0	0	0	0	0	0	0	0	0	0	0	0	0	0	0	2.43799	4.42731	0	0	0	0	0	0	0	0	0	0	0	0	0	2.992	0	0
128.1/2.9 (6933)	128.108	2.86	6933	0	0	0	0	0	0	32.0481	0	0	52.7232	0	0	0	48.2574	0	0	0	0	0	0	0	0	0	0	0	0	0	0	0	0	0	0	0	0	0	0	0	0	0	0	0	0	0	0	0	0
129.0/14.4 (6940)	128.959	14.43	6940	0	0	0	0	0	0	0	1.41632	0	0	0	0	0	0	0	3.5494	0	0	0	0	0	0	0	-0.0567207	0	0	0	0	0	0	0	0	0	0	0	0	0	0	0	0	0	0	0	0	0	0
129.0/1.4 (6945)	128.985	1.36	6945	0	0	0	0	0	0	0	0	0	0	0	0	0	0	0	0	0	0	24.1605	2.13032	2.23322	41.2703	0	4.03798	0	4.15826	0	0	3.56206	0	0	0	0	0	0	0	0	0	0	0	0	0	0	0	0	0
129.0/1.4 (6946)	129.017	1.36	6946	6.23357	0	11.9607	0	4.55508	4.36955	0	0	0	0	0	0	0	0	0	0	7.21122	0	0	0	0	0	0	0	0	0	0	0.977346	0	2.51415	0	0	0	0	0	0	0	0	0	0	0	0	0	0	0	0
129.1/4.7 (6959)	129.101	4.7	6959	0	0	0	0	0	0	0	0	0	0	0	0	0	0	13.2129	0	2.36774	0	0	0	0	0	0	0	1.61287	0	0	0.741713	0	0	0	0	0	0	0	0	0	0	0	0	0	0	0	0	0	0
129.1/3.1 (6964)	129.101	3.13	6964	24.8782	0	3.75375	6.80206	0	0	81.7762	0	89.672	103.49	0	74.8299	105.265	68.0983	0	0	0	0	0	0	0	0	0	0	0	0	0	0	0	0	0	0	0	0	0	0	0	0	0	0	0	0	0	0	0	0
129.1/3.0 (6967)	129.102	3	6967	0	0	4.2419	0	5.30915	0	0	0	0	0	84.4794	0	0	0	208.716	0	2.15496	0	2.28415	0	0	0	0	0	0	0	0	0	5.70463	0	0	0	0	0	0	0	0	0	0	0	0	0	0	0	0	0
129.1/4.9 (6974)	129.103	4.91	6974	0	6.79381	2.42993	0	0	0	0	0	0	0	0	0	0	0	0	0	0	0	0	0	0	0	0	0	0	0	0	1.77697	0	0	0	0	0	0	0	0	0	0	0	0	0	0	0	0	0	0
130.0/2.8 (6989)	130.048	2.81	6989	0	0	0	0	0	0	0	0	0	4.65215	0	0	0	0	0	0	1.88191	0	0	0	0	0	0	0	0	0	7.34757	0	0	7.09113	0	0	0	0	0	0	0	0	0	0	0	0	0	0	0	0
130.0/1.0 (7001)	130.049	1.02	7001	1767.4	1903.68	2130.5	0	1112.11	1277.53	0	1241.39	937.379	0	944.603	1358.64	880.622	0	0	1445.91	1948.96	0	1875.55	769.643	2172.27	1579.16	1404.82	1577.23	2302.4	2008.28	2458.91	1558.18	1100.23	808.96	6.0926	9.07318	8.10804	0	11.9513	6.60074	23.7838	0	0	18.0768	17.6149	0	22.8605	0	21.8096	0
130.0/1.4 (7007)	130.05	1.44	7007	1027.39	1041.14	1561.54	0	764.881	1088.12	1355.94	1981.64	1934.63	0	2813.9	1224.08	1532.73	368.389	1014.96	1666.48	2814.65	0	1152.23	954.651	1394.6	741.331	2842.81	2029.1	1244.24	1371.59	981.29	1572.59	873.726	1723.75	0	0	0	0	0	0	0	0	0	0	0	0	3.18685	0	0	0
130.0/1.1 (7009)	130.05	1.15	7009	0	159.666	72.8499	365.797	132.943	0	0	0	57.7845	0	73.9493	40.3597	0	0	290.747	83.9146	45.8653	191.701	0	86.3897	68.414	0	34.5087	94.8703	0	99.6846	0	87.5326	1372.5	52.0708	0	0	0	8.52265	0	0	0	25.3974	21.1044	0	0	14.2446	0	21.617	0	10.734
130.1/12.8 (7014)	130.05	12.8	7014	0	0	0.892877	8.23571	13.4834	0	2.74589	0	0	4.23595	0	0	0	0	0	1.80715	0	6.56357	1.80651	0	0	0	0	0	0	0.232796	0	0	0	0	0	0	0	0	0	0	0	0	0	0	3.92404	0	0	0	0	0
130.1/1.0 (7018)	130.051	1	7018	0	0	0	0	0	0	1121.53	0	0	1075.22	0	0	0	1166.85	0	0	0	1771.94	0	0	0	0	0	0	0	0	0	0	0	0	0	0	0	0	0	0	0	0	0	0	0	0	0	0	0	0
130.1/1.4 (7021)	130.052	1.35	7021	0	0	0	0	0	0	0	0	0	620.718	0	0	0	0	0	0	0	1015.22	0	0	0	0	0	0	0	0	0	0	0	0	0	0	0	0	0	0	0	0	0	0	0	0	0	0	0	0
130.1/4.0 (7024)	130.061	3.98	7024	0	0	0	0	0.815381	0	0	0.907237	0	0	0	0	0	0	0.610591	0	0	0	0	0	0	0	0	0	0	0	0	0	0	0	0	0	0	0	0	0	0	0	0	0	0	0	0	0	0	0
130.1/4.2 (7030)	130.063	4.24	7030	0	0	2.20702	0	0	0	0	0	0	0	0	0	2.67216	0	0	0	1.3174	0	0	0	6.55488	13.514	8.47662	4.69278	0	0	0	0	5.77029	0	0	0	0	0	0	0	0	0	0	0	0	0	0	0	0	0
130.1/2.2 (7031)	130.063	2.18	7031	0	0	1.46738	17.7456	12.8095	0	0	4.63715	8.58196	0	0	0	5.80854	0	0	0	0	0	0	0	10.0593	0	0	0	1.65348	0	37.5965	0	0	15.2998	0	0	0	0	0	0	0	0	0	0	0	0	0	0	0	0
130.1/2.5 (7034)	130.064	2.47	7034	0	0	0	131.251	0	0	0	4.25411	0	0	12.8897	0	0	0	0	0	0	3.59525	0	0	0	0	0	2.96712	0	0	0	0	0	0	0	0	0	0	0	0	0	0	0	0	0	0	0	0	0	0
130.1/3.1 (7038)	130.064	3.08	7038	0	34.6349	0	463.385	0	0	7.54692	0	53.7	20.1029	0	0	0	5.18349	0	0	0	0	246.453	5.5447	0	4.18573	0	0	197.563	0	284.805	0	0	4.76747	0	0	0	0	0	0	0	0	0	0	0	0	0	0	0	0
130.1/2.9 (7042)	130.065	2.93	7042	15.5002	0	7.98883	0	0	0	0	0	118.071	0	0	0	27.1372	0	0	180.327	217.677	0	0	0	146.857	0	175.71	138.014	4.87497	0	2.40617	238.835	8.63464	0	0	0	0	0	0	0	0	0	0	0	0	0	0	0	0	0
130.1/3.4 (7045)	130.065	3.37	7045	0	0	301.467	0	311.866	0	0	0	0	0	0	0	0	0	0	0	412.43	0	0	0	0	0	286.938	0	204.302	0	0	396.607	232.393	0	0	0	0	0	0	0	0	0	0	0	0	0	0	0	0	0
130.1/3.5 (7044)	130.065	3.48	7044	0	0	0	0	0	0	0	0	0	0	0	0	0	0	0	0	0	0	0	0	0	270.037	0	0	0	0	3.08181	0	0	0	0	0	0	0	0	0	0	0	0	0	0	0	0	0	0	0
130.1/6.6 (7101)	130.122	6.58	7101	0	0	0	0	0	0	19.404	17.7742	23.7381	36.8595	26.4324	23.3498	26.1376	32.9739	36.2689	0	0	0	0	0	0	0	0	0	0	0	0	0	0	0	0	0	0	0	0	0	0	0	0	0	0	0	0	0	0	0
130.2/1.1 (7106)	130.157	1.1	7106	0	0	0	0	0	0	0	0	0	0	0	0	0	0	0	0	0	0	0	0	0	0	0	0	0	0	0	0	0	0	0	0	0	0	0	1.72872	0	0	3.08407	0	0	0	0	0	0	0
130.2/1.1 (7116)	130.158	1.12	7116	0	0	0	0	0	0	0	0	0	0	0	0	0	0	0	0	0	0	0	0	0	0	0	0	0	0	0	0	0	0	48.1473	54.0465	62.9628	39.4443	48.4635	37.0804	20.192	17.8258	26.7232	20.9931	23.7735	25.7413	20.2039	24.3374	31.5982	47.5919
131.0/3.9 (7122)	130.963	3.88	7122	0	0	0	3.28733	0	0	0	0	0	0	0	0	0	0	0	2.62312	0	0	0	0	0	0	0	0	0	0	0	0	0	0	0	0	0	0	0	0	0	0	0	0	0	4.15366	6.08855	0	0	5.23626
131.0/2.0 (7123)	130.964	1.96	7123	0	0	0	0	0	0	0	0	0	0	0	0	0	0	0	0	0	0	0	0	0	0	11.0183	0	0	0	0	0	0	8.48043	0	0	0	1.70483	0	0	0	0	0	0	0	1.15286	0	0	0	0
131.0/1.2 (7124)	130.964	1.23	7124	0	0	0	0	0	0	0	10.1384	1.37325	0	0	0	3.74575	0	12.5056	0	0	0	0	0	0	0	0	0	2.57976	3.10005	0	0	0	0	0.67738	0	0	0	0.445745	0	1.96039	1.08293	2.69286	3.06785	2.10817	3.41219	4.07758	0.989546	0	0
131.0/3.6 (7138)	130.966	3.64	7138	0	0	0	0	0	0	0	0	0	7.42463	0	0	0	5.20453	0	8.37067	6.80082	6.75176	0	0	0	8.55358	0	0	3.38335	0	3.53797	0	0	0	0	0	0	0	0	0	6.23712	0	0	7.09124	0	0	5.14317	0	0	0
131.0/3.9 (7142)	130.966	3.9	7142	0	0	0	0	0	0	5.60609	0	0	0	0	0	0	0	0	0	0	0	6.83349	0	0	2.5654	0	0	0	0	0	0	0	0	0	0	0	0	0	0	0	0	0	0	0	0	0	0	0	0
131.0/2.7 (7162)	131.048	2.68	7162	0	0	575.111	0	621.545	0	0	0	0	0	0	0	400.88	0	336.983	800.136	806.209	0	0	493.297	585.188	0	0	850.435	0	595.475	802.804	0	0	860.989	0	0	0	0	0	0	0	0	0	0	0	0	0	0	0	0
131.0/1.7 (7163)	131.048	1.72	7163	626.041	0	0	0	0	0	0	0	0	0	0	0	0	0	263.609	0	0	0	0	0	0	0	0	0	0	0	0	0	405.199	0	0	0	0	0	0	0	0	0	0	0	0	0	0	0	0	0
131.0/1.2 (7164)	131.048	1.21	7164	0	124.394	160.024	460.478	140.32	282.216	83.2749	87.842	138.004	65.8768	122.797	70.2489	85.2653	195.026	0	384.299	201.566	115.716	0	84.1558	165.937	8.34449	228.554	150.44	230.51	76.4202	0	402.639	0	323.127	0	0	0	0	0	0	0	0	0	0	0	0	0	0	0	0
131.0/2.1 (7165)	131.049	2.09	7165	0	0	12.8896	0	0	0	0	3.92858	0	4.92909	3.00627	0	0	11.2292	0	0	0	7.0986	0	0	0	0	0	0	0	0	0	4.99715	0	0	0	0	0	0	0	0	0	0	0	0	0	0	0	0	0	0
131.0/2.8 (7167)	131.049	2.8	7167	0	0	0	0	0	0	0	0	0	0	0	0	0	0	0	0	0	0	1016.08	0	0	0	766.685	0	793.134	0	0	749.936	670.143	0	0	0	0	0	0	0	0	0	0	0	0	0	0	0	0	0
131.0/2.4 (7168)	131.049	2.45	7168	0	361.584	0	0	0	492.932	352.3	336.443	376.832	10.2979	370.85	222.85	0	0	0	0	0	511.706	0	0	0	0	0	0	0	0	0	0	0	0	0	0	0	0	0	0	0	0	0	0	0	0	0	0	0	0
131.1/2.0 (7182)	131.073	1.99	7182	0	0	0	0	0	0	1.20086	0	0	3.27254	0	0	0	0	0	0	0	0	0	0	0	0.66541	0	0	0	0	0	0	0	0	0	0	0	0	0	0	0	0	0	0	0	0	0	0	0	0
131.7/1.2 (7188)	131.699	1.16	7188	35.3949	0	21.8197	0	0	9.3506	0	0	0	0	18.8532	14.9469	17.2267	9.64956	19.1869	18.0112	0	0	0	17.6834	15.3255	19.5531	24.1785	18.7909	20.2747	0	21.0194	0	34.3732	0	0	0	0	0	0	0	0	0	0	0	0	0	0	0	0	0
131.9/3.9 (7200)	131.931	3.86	7200	0	0	0	0	0	0	0	0	0	0	0	0	0	0	0	0	0	0	0	0	0	0	0	0	0	0	0	0	0	0	0	0	0	0	0	0	0	0	0	0	1.50606	0	0	0	0	5.19134
132.0/4.6 (7206)	132.029	4.58	7206	0	0	0	0	0	0	95.3229	62.3601	50.1769	81.6574	47.923	45.0658	64.3478	0	0	0	0	0	0	0	0	0	0	0	0	0	0	0	0	0	0	0	0	0	0	0	0	0	0	0	0	0	0	0	0	0
132.0/4.5 (7208)	132.03	4.47	7208	0	0	0	0	0	0	2.46157	0	0	0	2.06836	0	0	83.4866	0	0	0	0	0	0	0	0	0	0	0	0	0	0	0	0	0	0	0	0	0	0	0	0	0	0	0	0	0	0	0	0
132.0/3.7 (7210)	132.047	3.69	7210	0	0	0	0	0	0	0	5.84327	6.61197	3.32395	5.30571	2.98915	11.9561	1.26696	11.4073	0	0	0	4.74944	0	0	0.834643	0	0	0	0.804475	22.7771	0	0	0	0	0	0	0	0	0.707823	0	0	0	0	0	0	0	0	0	0
132.0/3.1 (7211)	132.047	3.1	7211	0	0	0	0	0	0	0	0	0	0	0	2.58124	5.56499	0	0	0	0	0	0	0	0	0	0	0	0	0	0	0	0	0	0	0	0	0	0	0	0	0	0	0	0	0	0	0.525608	0	0
132.1/2.5 (7236)	132.08	2.53	7236	0	0	0	313.577	18.344	0	170.432	0	0	0	0	0	9.65538	0	0	0	0	0	0	0	0	0	0	0	0	0	0	0	0	11.2418	0	0	0	0	0	0	0	0	0	0	0	0	0	0	0	0
132.1/3.1 (7239)	132.08	3.09	7239	0	23.2827	0	1144	0	0	7.52457	0	0	7.8924	0	0	0	0	0	425.311	0	0	524.225	21.5715	0	0	0	0	406.718	0	604.632	0	0	0	0	0	0	0	0	0	0	0	0	0	0	0	0	0	0	0
132.1/3.3 (7241)	132.08	3.25	7241	1704.97	735.763	720.845	0	757.632	859.19	421.427	453.704	482.611	472.51	503.829	433.17	506.971	566.833	1022.83	844.353	983.488	0	713.098	620.014	634.094	703.422	751.159	843.356	679.668	750.532	551.201	867.852	1595.38	887.579	0	0	0	0	0	0	0	0	0	0	0	0	0	0	0	0
132.1/2.9 (7242)	132.081	2.92	7242	5.78798	0	222.332	0	0	0	0	0	199.572	0	8.73225	0	0	0	0	1.46343	426.826	0	0	0	304.138	0	384.217	339.278	0	0	0	499.174	0	0	0	0	0	0	0	0	0	0	0	0	0	0	0	0	0	0
132.1/2.7 (7243)	132.081	2.71	7243	0	212.248	1.66683	0	0	0	0	131.672	0	0	165.42	160.332	69.3676	326.99	0	0	0	0	6.97581	40.0053	4.25962	0	0	1.97249	0	94.4149	0	0	0	0	0	0	0	0	0	0	0	0	0	0	0	0	0	0	0	0
132.1/2.7 (7250)	132.1	2.7	7250	25.1654	0	0	0	0	9.85465	0	0	0	0	0	0	0	0	0	9.97618	0	0	0	0	0	0	0	0	0	0	0	0	0	0	0	0	0	0	0	0	0	0	0	0	0	0	0	0	0	0
132.1/3.7 (7256)	132.101	3.73	7256	0	0	0	48.0136	0	0	0	0	0	0	0	0	0	0	0	0	0	0	5.1376	0	0	4.22025	23.1396	0	8.22092	0	0	0	0	2.63815	0	0	0	0	0	0	1.09816	0	0	0	0	0	0	0	0	0
132.1/5.1 (7258)	132.101	5.08	7258	60.5722	7.78494	13.6361	0	0	24.8242	3.59672	0	12.3574	0	0	0	8.36203	14.6747	26.1105	40.7592	47.2373	0	15.8668	0	37.5648	27.304	21.9396	40.3535	60.4345	75.2026	0	41.8002	25.5244	47.7501	0	0	0	0	0	0	0	0	0	0.560109	0	0	0	0	0	0
132.1/6.3 (7263)	132.101	6.32	7263	75.1366	33.1813	92.5321	19.9124	76.8842	0	18.5906	0	26.2494	19.0044	3.20839	18.5787	0	18.1718	31.6532	150.024	134.229	0	0	0	11.9423	11.848	20.7077	48.1855	28.9855	0	0	128.55	126.337	35.4608	0	0	0	0	0	0	0	0	0	0	0	0	0	0	0	0
132.1/3.0 (7267)	132.101	3.02	7267	120.751	111.625	41.0487	0	0	61.8471	8.41911	8.24233	6.04717	12.5655	13.2852	23.8494	21.9493	30.5473	25.7528	40.1681	0	41.0941	4.51656	22.4119	34.6309	0	0	15.828	0	3.28478	0	58.6536	0	37.2943	0	0	0	0	0	0	2.64249	0	0	0	0	1.81929	5.24141	0	0	0
132.1/3.4 (7265)	132.101	3.37	7265	0	0	0	0	0	0	2.96639	0	0	0	0	3.27983	0	0	0	0	0	0	0	0	0	0	0	0	0	0	0	0	197.459	0	0	0	0	0	0	0	0	0	0	0	0	0	0	0	0	0
132.1/7.9 (7268)	132.101	7.95	7268	98.8411	52.0645	42.9688	54.9339	49.3693	49.8089	8.44926	7.05817	5.10154	6.02576	5.97719	6.91825	5.0935	4.09328	9.06161	69.651	53.0077	0	9.10636	12.2382	6.9431	0	7.80116	9.47263	13.1646	12.1515	6.59303	55.1088	67.7523	46.6221	0	0	0	0	0	0	0	0	0	0	0	0	0	0	0	0
132.1/7.6 (7270)	132.101	7.56	7270	60.3162	53.7656	47.5222	57.9554	49.2725	45.4818	0.528553	0	0	0	0	0	0	0	0	80.2423	61.0715	0	0	2.59821	4.03826	4.69257	5.31158	4.94454	5.18249	4.48661	0	65.5206	60.7559	38.5703	0	0	0	0	0	0	0	0	0	0	0	0	0	0	0	0
132.1/1.2 (7273)	132.102	1.16	7273	5969.92	3981.41	3961.88	3875.48	4201.04	4350.94	3523.02	3376.4	3433.73	3879.48	3682.66	3537.26	3125.01	3685.49	3866.51	5063.48	4580.25	0	4561.12	3791.3	3923.14	4727.42	4685.26	4545.7	4660.21	4137.04	4627.81	4543.74	5806.22	4617.51	0	0.655519	0	0	1.68504	0	0	1.59419	1.62339	6.1679	0	5.11363	7.5784	3.92649	8.97351	19.1232
132.1/1.5 (7274)	132.102	1.49	7274	7640.2	4039.46	0	4231.88	0	0	0	0	0	0	0	2181.35	0	2733.64	4982.75	0	0	0	0	3328.19	0	0	0	0	0	4486.39	6449.13	0	3693.33	0	0	0	0	0	0	0	0	0	0	0.35486	0	0	0	0	0	0
132.1/1.6 (7277)	132.102	1.65	7277	0	0	5426.08	0	3795.29	3915.01	2217.44	2174.54	2688.38	2199.07	2746.08	0	2616.93	0	0	6402.85	6041.74	2826.55	6514.47	0	4219.51	5735.97	5580.72	5303.02	4878.53	0	0	5918.57	0	4982.73	0	0	0	0	0	0	0	0	0	0	0	0	0	0	0.627043	0
132.1/4.5 (7281)	132.103	4.52	7281	0	0	6.46805	0	0	14.7333	34.511	33.0991	23.7064	43.5576	27.255	24.4012	0	45.2102	0	0	5.39658	37.9803	0	0	22.4319	0	17.0971	0	8.61464	0	0	10.0581	0	7.67498	0	0	0	0	0	0	0	0	0	0	0	0	0	0	0	0
132.1/4.7 (7283)	132.104	4.71	7283	0	0	3.20525	0	0	0	0	0	0	0	0	0	0	0	0	2.37345	0	30.7339	0	1.18611	0	9.13816	0	0	11.0034	0	0	0	0	0	0	0	0	0	0	0	0	0	0	0	0	0	0	0	0	0
133.0/1.1 (7300)	133.032	1.14	7300	9054.38	6913.67	6774.65	6080.43	7152.86	6838.86	5705.23	5520.23	5544.92	5708.17	5577	5455.53	4683.77	6285.76	6716.8	7980.14	7598.3	0	7671.61	6552.34	6521.92	8089.32	7746.77	7278.7	7897.96	6929.82	8012.18	7681.12	8785	6843.43	0	0	0	0	0	0	0	0	0	0	0	0	0	0	0	0.651303
133.0/3.9 (7304)	133.049	3.85	7304	0	0	0	0	0	0	0	13.3046	17.6983	0	0	17.7669	0.944474	0	44.2239	0	0	0	0	0	0	0	0	0	0	0	0	0	0	0	0	0	0	0	0	0	0	0	0	0	0	0	0	0	0	0
133.1/3.8 (7305)	133.051	3.81	7305	0	0	0	0	0	0	13.7937	0	0	8.54804	7.44015	0	0	0	0	0	0	0	0	0	0	0	0	0	0	0	0	0	0	0	0	0	0	0	0	0	0	0	0	0	0	0	0	0	0	0
133.1/4.0 (7309)	133.06	3.95	7309	0	2.32005	0	0	0	0	0	0	0	0	0	0	0	0	0	5.46883	0	0	0	0	2.69428	0	0	3.05614	0	0	0	6.41595	4.4416	0	0	0	0	0	0	0	0	0	0	0	0	0	0	0	0	0
133.1/13.9 (7316)	133.065	13.91	7316	0	0	0	0	0	0	1.12645	3.05127	3.51296	1.84181	0	1.24573	0	1.80632	0	0	0	0	0	0	0	0	2.44557	0	0	0	0	0	0	2.49319	0	0	0	4.58892	2.00711	0	0	0.918465	1.25066	0	0	0	0	0	0	0
133.1/14.4 (7326)	133.087	14.35	7326	0	0	0	0	0	0	0	0.964647	0	0	0	0	0	0	0	0	0	0	0	0	0	0	0.76627	0	0	0	0	0	0	0	0	0	0	0	0	0	0	0.607632	0	0	0	0	0	0	0	0
134.0/4.9 (7354)	134.044	4.92	7354	0	0	0	0	0	0	0	0	0	0	0	0	0	0	0	0	1.9792	2.30803	0	0	0	0	2.50253	0	3.92712	0	0	0	0	0	0	0	0	0	0	0	0	0	0	0	0	0	0	0	0	0
134.1/1.1 (7365)	134.06	1.11	7365	0	0	0	0	0	0	0	1.72723	0	0	0	0	0	6.98099	0	0	5.29982	0	0	0	0	0	0	0	0	0	0	0	0	0	0	0	0	0	0	0	0	59.6743	64.0194	0	0	0	0	0	0	0
135.0/1.0 (7377)	135.044	1	7377	0	0	0	608.381	0	0	0	0	0	0	0	0	0	0	0	0	0	0	0	0	0	0	0	0	0	0	0	0	71.6056	76.7026	0	1.18963	0	0	0	0	0	0	0	0	0	0	0	0	0	0
136.0/1.2 (7399)	136.025	1.22	7399	0	1.52993	0	0	0	0	0	0	0	49.7551	0.915456	0	14.7925	28.8812	0	0	2.43635	1.43738	1.91336	0	0	0	0	0	0	0	0	0	0	0	0	0	0	0	0	0	0	0	0	0	0	0	0	0	0	0
136.0/1.1 (7400)	136.029	1.11	7400	0	0	0	0	6.77931	0	0	0	0	13.8895	13.5515	0	0	0	0	0	0	0	2.62042	11.181	0	19.0642	2.42119	3.70466	0	0	0	0	0	0	0	0	0	0	0	0	0	0	0	0	0	0	0	0	0	0
136.1/1.0 (7402)	136.06	1.05	7402	215.19	0	0	0	0	273.44	12.8847	0	14.23	0	9.64644	0	32.7088	23.9524	20.9586	195.411	0	0	78.6709	47.5839	47.6898	118.154	88.6207	77.9497	165.208	55.7382	229.137	239.625	218.629	0	0	1.46986	0	0	0	1.43199	4.05339	6.19579	7.36324	6.78038	13.7204	0	5.11305	5.52144	8.39659	0
136.1/1.1 (7424)	136.075	1.14	7424	4136.8	3610.42	3350.38	5623.92	3943.66	3574.48	3112.71	3001.37	2955.13	3079.83	3097.26	3157.82	2825.25	3202.79	3213.14	4192.9	2966.13	2888.2	3996.28	4042.05	3216.02	4169.39	3030.09	3038.07	4321.99	2737.05	3879.55	4443.34	4637.78	4117.46	0	0.889106	0	0.43887	1.32567	0.894788	8.14588	16.655	21.1926	3.64931	0	0	0	0	1.71844	1.01114
136.1/2.5 (7425)	136.075	2.47	7425	0	0	0	0	3.84526	0	0	0	0	24.6749	0	0	37.6506	0	0	7.13508	3.07977	0	0	0	0	0	0	0	0	0	0	0	0	0	0	0	0	0	0	0	0	0	0	0	0	0	0	0	0	0
136.1/2.3 (7426)	136.076	2.33	7426	0	0	0	0	1.78227	0	41.5082	0	34.4165	0	43.2116	0	0	0	2.68518	0	0	0	0	0	0	0	0	0	0	0	0	0	0	0	0	0	0	0	0	0	0	0	0	0	0	0	0	0	0	0
136.1/1.4 (7429)	136.076	1.36	7429	370.032	765.143	1316.9	2783.82	413.331	980.103	760.711	685.239	870.904	521.563	1010.46	414.035	1563.97	920.36	1077.17	2767.76	2112.15	228.946	2922.93	543.518	1120.85	1576.56	1941.43	2156.67	2416.27	747.932	1811.47	2017.55	932.984	2236.84	0	0	0	0	0	0	0	0	0	0	0	0	0	0	0.505894	0
136.9/3.8 (7496)	136.93	3.85	7496	0	0	0	0	0	0	0	0	0	0	0	0	0	0	0	0	0	0	0	1.79844	0	0	0	0	0	0	0	0	0	0	0	0	0	0	0	0	4.48328	0	0	6.93658	0	0	13.3384	7.19826	0	6.18726
137.0/1.5 (7504)	137.045	1.49	7504	517.747	366.06	521.344	789.502	433.671	470.051	0	8.56867	6.77526	0	15.6826	0	13.672	6.39926	0	625.099	631.572	0	270.134	87.9524	115.613	117.053	242.621	178.941	0	138.082	0	554.512	520.223	639.536	0	0	0	0	0	0	0	0	0	0	0	0	0	0	0	0
137.0/1.1 (7506)	137.046	1.14	7506	1147.45	716.13	836.441	1007.93	756.577	776.505	305.7	326.309	290.95	328.96	257.283	285.741	329.231	267.772	338.571	1561.32	1341.95	1340.73	1286.43	966.131	949.121	1206.4	1278.18	996.242	755.424	895.94	659.292	1350.41	1856.48	1322.84	0	0	0	0	0	0	0	0	0	0	0	0	0	0	0	0
137.1/1.4 (7509)	137.058	1.37	7509	0	0	0	17.4726	0	0	0	0	0	0	0	0	18.0272	0	4.80934	0	0	0	0	0	7.13452	0	0	0	0	11.6069	0	20.9378	0	0	0	0	0	0	0	0	0	0	0	0	0	0	0	0	0	0
137.1/1.4 (7512)	137.06	1.41	7512	0.586553	0	0	0	0	16.0239	0	11.2337	0	4.53267	0	0	0	0	0	34.2192	24.1797	0	26.5358	6.94621	0	9.32277	0	25.4725	28.7796	0	6.3443	0	0	24.616	0	0	0	0	0	0	0	0	0	0	0	0	0	0	0	0
138.1/2.9 (7532)	138.054	2.86	7532	0	0	8.24604	0	0	6.91122	0	0	9.51566	5.81103	49.3579	18.176	0	65.329	131.909	58.419	5.73956	0	0	47.0718	92.6564	0	0	159.243	0	34.7995	0	0	0	1.18333	0	0	0	0	0	0	0	0	0	0	0	3.42171	9.56433	0	0	0
138.1/3.0 (7533)	138.055	3.03	7533	77.3319	0	0	0	0	0	0	0	0	0	0	0	0	0	0	0	0	0	189.911	0	0	0	132.962	0	210.903	0	161.428	30.1304	56.3596	0	0	0	0	0	0	0	0	0	0	0	0	0	0	0	0	0
138.1/4.3 (7546)	138.091	4.28	7546	0	0	0	0	0	0	0	0	63.1844	0	56.8317	52.9583	55.7002	0	75.0828	45.0152	86.9479	0	0	0	0	3.40253	1.03386	0	0	0	0	0	0	0	0	0	0	0	0	0	0	0	0	0	0	0	0	0	0	0
138.1/4.2 (7548)	138.093	4.23	7548	0	0	0	0	0	0	42.0358	45.5217	0	69.214	0	0	0	53.9058	0	0	0	85.5923	0	0	0	0	0	0	0	0	0	0	0	0	0	0	0	0	0	0	0	0	0	0	0	0	0	0	0	0
139.0/3.8 (7566)	139.037	3.77	7566	0	0	0	0	0	0	0	0	0	0	0	0	0	0	0	4.0603	1.88471	0	0	0	0	0	0	0	0	0	0	0	0	0	0	0	0	0	0	0	0.373712	0	22.0231	0	0	0	0	0	0	0
139.0/4.8 (7568)	139.038	4.79	7568	0	0	0	0	0	0	0	0	0	0	0	0	0	0	0	0	0	0	0	0	0	0	0	0	0	0	0	0	0	0	0	0	0	0	0	0	19.4843	39.18	95.6389	0	0.695404	38.2561	0	0	0	0
139.0/6.3 (7569)	139.038	6.31	7569	0	0	0	0	0	0	0	0	0	0	0	0	0	7.43279	0	0	0	0	0	0	0	0	0	0	0	0	0	0	0	0	0	0	0	0	0	0	22.8075	60.0495	208.528	20.5873	0	56.5532	0	0	0	0
139.1/5.3 (7577)	139.075	5.35	7577	0	0	0	0	0	0	0	0	0	0	0	0	0	0	0	0	0	0	0	0	0	0	0	0	0	0	0	0	0	0	0	0	0	0	0	0	21.5966	30.4661	30.033	26.4257	0	10.6719	26.5753	9.28507	23.6689	0
139.1/3.6 (7579)	139.085	3.57	7579	0	0	0	0	0.470338	0	0	1.72801	0	0	0	0	0	0	7.86915	0	0	0	0	0	0	0	0	0	0	0	0	0	0	0	0	0	0	0	0	0	0	0	0	0	0	0	0	0	0	0
140.0/1.5 (7594)	140.002	1.45	7594	0	0	3.35397	0	0	3.39937	0	0	0	0	0	0	0	0	0	1.53676	6.73157	0	59.007	18.0951	4.15901	90.0194	0	10.3379	0	7.93621	0	3.16706	4.32697	0	0	0	0	0	0	0	0	0	0	0	0	0	0	0	0	0
140.0/1.5 (7595)	140.016	1.48	7595	0	0	0	0	0	1.54123	0	0	4.19824	9.55867	0	0	0	0	0	0	2.19864	0	0	0	2.1002	0	6.58199	0	1.38022	0	0	0	0	1.85338	0	0	0	0	0	0	0	0	0	0	0	0	0	0	0	0
140.1/3.2 (7605)	140.05	3.24	7605	15.8639	1.88402	0	0	0	6.01806	0	0	0	0	0	0	0	0	0	0	0	0	0	0	0	0	0	0	0	0	0	6.84439	0	0	0	0	0	0	0	0	0	0	0	0	0	0	0	0	0	0
140.1/3.7 (7607)	140.063	3.67	7607	0	0	0	0	0	0	0	0	0	0	0	0	0	0	0	0	0	0	0	0	0	0	0	0	0	0	0	0	0	0	0	0	0	0	0	0	0	0	0	0	1.07237	0	0	6.41066	0	0
140.1/14.5 (7611)	140.066	14.52	7611	0	0	4.55286	0	0	0	0	0	6.45388	0	3.87338	0	10.6972	7.96683	4.11665	3.40821	11.2222	0	0.513772	0	0	0	0	0	11.7735	0	3.9814	3.31955	6.4011	0	5.87866	8.43106	6.86629	1.56385	0	0	5.09509	3.78233	8.53802	0	5.98898	3.84764	11.501	0	0	0
140.1/1.0 (7639)	140.081	1	7639	0	0	0	0	0	0	0	0	0	0	0	0	0	0	0	0	0	0	0	0	0	0	0	0	0	0	0	0	0	0	0	0	0	0	0	0	99.9279	101.908	89.2073	59.5498	51.379	5.87893	91.2603	44.5662	84.4224	0
141.0/1.5 (7650)	141.001	1.52	7650	0	0.666341	0	0	0	0	0	0.582024	0	0	0	0	27.8678	0	0	0	0	0	0	0	0	0	0	0	0	0	0	1.59303	0	0	0	0	0	0	0	0	0	0	0	0	0	0	0	0	0	0
141.0/1.3 (7652)	141.007	1.27	7652	0	0	0	0	0	0	0	0	0	88.9834	0	0	0	36.7659	0	0	0	0	0	0	0	0	0	0	0	0	0	0	0	0	0	0	0	0	0	0	0	0	0.409034	0	0	0	0	0	0	0
141.0/1.5 (7653)	141.014	1.47	7653	22.1002	3.49467	16.0166	0	2.61371	11.9708	0	0	0	0	7.63844	1.55068	0	0	0.77339	2.30659	0	1.53846	0	0	0	0	0	0	0	10.3193	0	15.0448	0	0	0	0	0	0	0	0	0	0	0	0	0	0	0	0	0	0
141.1/5.3 (7659)	141.054	5.28	7659	0	0	0	0	0	0	0	0	0	0	0	0	0	0	0	0	0	0	0	0	103.898	23.0162	32.0108	0	62.9968	0	0	0	0	0	0	0	0	0	0	0	0	0	0	0	0	0	0	0	0	0
141.1/4.0 (7660)	141.054	4.04	7660	0	0	0	0	0	0	0	0	0	0	0	0	0	0	4.63663	0	0	0	0	0	233.714	114.338	92.4936	92.1243	657.496	0	0	0	0	0	0	0	0	0	0	0	0	0	0	0	0	0	0	0	0	0
141.1/3.9 (7662)	141.054	3.88	7662	0	0	0	0	0	0	0	1.36144	1.48025	0	0	0	0	0	0	0	0	0	197.326	52.2179	0	0	2.80523	0	0	248.408	599.285	0	0	0	0	0	0	0	0	0	0	0	0	0	0	0	0	0	0	0
141.1/3.3 (7663)	141.058	3.31	7663	0	0	0	0	0	0	0	0	0	0	0	0	0	0	0	5.78871	0	0	4.51811	0	0	0	0	0	3.4166	0	0	0	0	0	0	0	0	0	0	0	0	0	0	0	0	0	0	0	0	0
141.1/3.5 (7674)	141.101	3.51	7674	0	0	0	0	0	0	1.4963	1.07575	0	0	0.458641	0	8.95657	0	0	0	1.39438	0	0	0	0	0	0	0	0	0	0	0	0	0	0	0	0	0	0	0	0	0	0	0	0	0	0	0	0	0
141.1/3.6 (7676)	141.102	3.64	7676	0	0	0	0	0	0	0	0	0	0	0	0	0	0	11.6176	0	1.20824	0	0	0	0	0	0	0	0	0	1.4855	0	0	0	0	0	0	0	0	0	0	0	0	0	0	0	0	0	0	0
142.1/2.5 (7732)	142.063	2.46	7732	0	0	0	71.2966	0	0	7.45058	3.22596	0	0	3.10767	0	0	0	0	0	0	0	0	0	0	0	0	0	0	2.05768	0	0	0	0	0	0	0	0	0	0	0	0	0	0	0	0	0	0	0	0
142.1/2.9 (7731)	142.063	2.86	7731	0	0	26.428	5.06656	0	0	0	0	0	0	0	0	0	0	0	0	64.6487	0	0	0	55.7962	0	0	42.8653	0	0	0	0	0	0	0	0	0	0	0	0	0	0	0	0	0	0	0	0	0	0
142.1/2.5 (7736)	142.066	2.47	7736	0	0	0	0	0	0	4.00421	0	0	0	2.12001	1.31652	0.670712	0	0	0	0	0	0	0	0	0	0	1.38862	0.652871	0	0	0	0	9.1103	0	0	0	0	0	0	0	0	0	0	0	0	0	0	0	0
142.1/2.8 (7740)	142.085	2.8	7740	0	0	0	0	0	0	0	76.6223	85.6494	0	60.4243	107.57	127.875	137.523	158.063	0	0	0	0	0	0	0	0	0	0	0	0	0	0	0	0	0	0	0	0	0	0	0	0	0	0	0	0	0.611728	0	0
142.9/1.2 (7751)	142.946	1.25	7751	3.88458	0	0	0	22.4426	0	0	0	0	0	0	0	0	0	0	0	12.5308	0	0	8.11683	0	0	0	0	0	10.4252	0	8.116	0	14.1697	0	0	0	0	0	0	0	0	0	0	0	0	0	0	0	0
142.9/1.3 (7754)	142.948	1.32	7754	0	0	16.8722	0	0	10.036	0	0	0	0	0	0	0	0	0	0	0	0	0	0	0	0	0	0	0	0	3.27059	0	9.17104	0	0	0	0	0	0	0	0	0	0	0	0	0	0	0	0	0
143.0/1.3 (7756)	143.005	1.26	7756	0	0	0	0	0	0	0	0	0	46.3711	0	0	1.253	9.25853	0	0	0	0	0	0	0	0	0	0	0	0	0	0	0	0	0	0	0	0	0	0	0	0	0	0	0	0	0	0	0	0
143.1/3.3 (7760)	143.071	3.3	7760	432.885	166.962	204.291	0	208.618	220.862	112.702	117.245	109.541	0	126.017	113.514	131.412	176.945	266.528	256.927	254.679	0	180.3	166.761	179.788	188.996	182.269	228.308	182.969	208.668	139.523	256.76	407.953	248.71	0	0	0	0	0	0	0	0	0	0	0	0	0	0	0	0
143.1/2.9 (7761)	143.072	2.85	7761	0	0	44.1555	0	0	0	0	0	44.4044	0	0	0	0	0	0	0	110.279	0	0	0	0	0	0	52.894	0	0	0	0	0	0	0	0	0	0	0	0	0	0	0	0	0	0	0	0	0	0
143.1/2.2 (7762)	143.072	2.21	7762	0	0	0	0	4.83394	10.7235	2.02455	0	0	0	0	0	0	0	4.76627	0	0	0	0	0	0	0	0	0	0	0	14.569	0	0	3.73509	0	0	0	0	0	0	0	0	0	0	0	0	0	0	0	0
143.1/3.1 (7763)	143.072	3.07	7763	0	0	0	328.804	0	0	0	0	10.2124	3.45961	4.46361	0	0	0	0	112.835	0	0	132.241	0	0	0	95.9927	0	105.563	0	175.529	115.923	0	0	0	0	0	0	0	0	0	0	0	0	0	0	0	0	0	0
143.1/3.2 (7767)	143.074	3.23	7767	0	0	12.0674	0	0	0	0	0	0	123.745	1.40046	0	0	0	0	0	0	188.46	0	0	0	0	0	0	0	0	0	0	0	0	0	0	0	0	0	0	0	0	0	0	0	0	0	0	0	0
143.1/1.0 (7769)	143.079	1.02	7769	59.1383	0	80.8583	0	0	0	0	0	202.01	0	0	0	0	0	196.706	87.1959	94.5669	0	136.367	145.68	182.794	183.791	155.703	0	193.603	0	186.476	110.789	55.8059	67.4949	0	0	0	0	0	0	0	0	0	0	0	0	0	0	0	0
143.1/1.0 (7774)	143.081	1	7774	0	79.5767	0	25.2521	64.8029	63.5907	0	179.87	0	0	188.499	192.302	191.968	0	0	0	0	0	0	0	0	0	0	169.252	0	191.738	0	0	0	0	0	0	0	0	0	0	0	0	0	0	0	0	0	0	0	0
143.1/1.5 (7785)	143.117	1.51	7785	0	0	0	0	0	0	0	0	0	0	0	0	0	0	0	3.44056	0	0	0	0	0	3.8895	0	0	0	0	0	14.8312	0	0	0	0	0	0	0	0	0	0	0	0	0	0	0	0	0	0
143.1/1.2 (7787)	143.117	1.16	7787	0	6.80702	20.949	22.0058	0	0	3.11807	3.40306	0	0	0	0	0	5.25342	0	0	0	3.12694	0	0	0	0	0	0	0	0	0	7.05442	0	0	0	0	0	0	0	0	0	0	0	0	0	0	0	0	0	0
144.0/12.4 (7802)	143.957	12.44	7802	4.33749	4.654	1.10872	1.48158	0	0	0.764169	0	4.11271	0	4.43887	2.7823	2.02024	1.351	0	1.0866	0	0	0	0	0	0	0	0	0	1.50548	0	1.27066	0	0	0	1.57052	5.5113	0	4.24068	0	0	3.33957	5.16971	0	2.89572	0	1.98221	6.15787	3.41526	2.08661
144.0/12.7 (7807)	143.958	12.71	7807	0	0	0	0	0	0	0	0	0	0	0	0	0	0	7.45931	1.67955	0	0	0	0	0	0	0	0	0	0	1.35999	0	5.86392	0	3.39316	0	0	0	0	0	0	0	0	0	0	0	0	0	0	0
144.0/13.5 (7812)	143.959	13.5	7812	0	0	0	0	0	0	0	0	0	0	0	0	0	0	0	0	0	0	0	0	3.93648	0	0	0	2.44047	0	0	3.75895	0	0	0	0	0	0	0	0	0	0	0	0	0	0	0	0	0	0
144.0/1.2 (7815)	143.968	1.22	7815	0	0	0	142.378	0.981096	0	0	0	0	57.5813	0	0	4.54406	23.3726	0	0	0	0	0	0	0	0	0	0	0	0	0	0	7.6923	17.6039	0	0	0	0	0	0	0	0	0	0	0	0	0	0	0	0
144.0/4.6 (7821)	144.03	4.58	7821	0	0	0	0	0	0	53.3888	7.7491	2.06444	36.5733	28.7659	17.2863	23.6837	36.5249	0	0	0	0	0	0	0	0	0	0	0	0	0	0	0	0	0	0	0	0	0	0	0	0	0	0	0	0	0	0	0	0
144.0/2.4 (7830)	144.048	2.35	7830	0	0	0	0	0	0	26.673	0	5.41438	0	0	2.55933	0	1.48714	0	0	0	0	0	0	0	0	0	0	0	0	0	0	0	0	0	0	0	0	0	0	0	0	5.74328	0	0	0	18.3169	11.8498	0	0
144.1/1.3 (7834)	144.063	1.26	7834	0	0	0	37.0741	0	0	0	0	0	0	0	0	0	0	0	0	0	0	0	2.11856	0	0	0	0	0	0	0	0	2.5254	0	0	0	0	0	0	0	0	0	0	0	0	0	0	0	0	0
144.1/3.3 (7837)	144.064	3.31	7837	0	0	0	0	0	0	20.4068	36.4974	0	0	29.7065	0	9.55588	0	0	0	0	0	0	0	0	0	0	0	0	0	0	0	0	0	0	0	0	0	0	0	31.8985	46.7529	0	15.2304	17.7512	26.8511	50.8863	26.3816	81.5644	0
144.1/3.8 (7838)	144.065	3.78	7838	0	5.76711	0	3.08057	0	0	0	89.0347	136.13	0	90.2623	98.7971	131.498	89.1026	126.866	71.3682	38.7288	0	77.5596	47.7667	72.9019	45.4858	85.8527	83.0755	90.3048	68.4689	0	56.562	70.8675	23.3111	0	0	0	0	0	0	154.057	135.624	193.05	143.47	120.812	116.57	176.244	105.037	170.746	244.729
144.1/3.4 (7839)	144.065	3.42	7839	0	0	0	0	0	0	0	0	41.7832	0	0	0	38.8681	0	0	0	0	4.26295	196.382	0	0	0	0	0	0	158.943	251.866	0	0	0	0	0	0	0	0	0	0	4.01477	0	0	0	0	0	0	0	97.9108
144.1/3.6 (7842)	144.065	3.57	7842	0	0	0	6.33995	0	12.1556	85.7297	69.3777	54.8767	81.0584	66.1784	89.2734	0	102.824	171.49	357.317	268.49	0	0	136.11	170.782	179.012	141.023	154.166	269.774	0	87.1513	241.245	414.682	332.32	0	0	0	76.2188	28.8939	61.4422	455.251	458.822	514.629	330.8	337.155	323.061	537.236	313.154	299.522	322.627
144.1/2.9 (7852)	144.08	2.86	7852	0	0	395.476	0	0	0	0	0	292.805	0	0	0	93.5592	0	0	0	648.508	6.71525	0	0	503.78	0	0	542.63	0	0	0	0	0	0	0	0	0	0	0	0	0	0	0	0	0	0	0	0	0	0
144.1/3.1 (7854)	144.08	3.09	7854	0	0	0	1660.14	0	0	0	0	20.0605	28.359	0	0	0	0	0	661.054	0	0	874.997	38.4509	0	0	599.235	0	642.819	0	944.772	746.637	0	0	0	0	0	0	0	0	0	0	0	0	0	0	0	0	0	0
144.1/3.8 (7853)	144.08	3.81	7853	22.8459	11.1879	14.3222	0	10.1669	0	6.9917	4.93419	0	0	0	0	2.75196	11.7533	0	12.6195	10.487	3.16604	0	0	0	0	0	0	0	0	0	18.1249	24.5061	17.5465	0	0	0	0	0	0	0	0	0	0	0	0	0	0	0	0
144.1/2.5 (7855)	144.08	2.49	7855	0	266.34	0	362.136	80.7414	0	283.188	202.305	0	0	0	243.165	73.9139	0	0	0	0	0	3.85196	0	0	0	0	0	0	8.40952	0	0	0	91.2184	0	0	0	0	0	0	0	0	0	0	0	0	0	0	0	0
144.1/2.0 (7856)	144.08	1.96	7856	0	0	0.672174	0	0	0	0	0	0	3.51406	0	0	0	0	0	0.437194	0	0	0	54.3993	0	0	0	0	0	105.867	0	0	0	0	0	0	0	0	0	0	0	0	0	0	0	0	0	0	0	0
144.1/2.3 (7857)	144.08	2.29	7857	0	0	0	274.883	92.3837	258.352	0	0	0	0	0	0	0	0	0	0	0	0	0	0	0	0	0	0	0	0	0	0	0	114.337	0	0	0	0	0	0	0	0	0	0	0	0	0	0	0	0
144.1/4.0 (7858)	144.08	3.97	7858	0	38.787	0	43.6761	0	0	5.32495	7.44389	0	0	24.4717	24.1519	44.575	54.765	0	0	0	0	102.7	0	0	0	0	0	0	40.1168	118.52	0	0	0	0	0	0	0	0	0	0	0	0	0	0.548895	0	0	0	0	0
144.1/3.2 (7859)	144.08	3.24	7859	2716.91	1129.57	1128.81	0	1218.84	1303.8	731.678	669.189	743.884	766.064	832.972	663.581	799.702	942.982	1536.4	1355.95	1457.69	0	1055.37	963.917	1027.79	1073.51	1182.87	1293.16	1038.22	1183.9	825.966	1446.97	2443.31	1464.31	0	0	0	0	0	0	0	0	0	0	0	0	0	0	0	0
144.1/4.2 (7860)	144.08	4.15	7860	94.0739	0	38.4661	0	35.1197	0	37.6332	39.9809	71.3681	0	30.803	41.0697	0	0	134.331	85.7034	63.977	0	0	41.5746	66.5563	113.389	78.7158	55.1819	90.3937	0	0	70.701	121.474	42.6135	0	0	0	0	0	0	1.26311	0	0	0	0	0	1.17957	0	0	0
144.1/2.4 (7862)	144.082	2.36	7862	0	55.6094	1.89216	0	8.34297	0	0	0	0	0	0	0	0	0	0	0	0	291.293	0	0	1.62706	0	0	0	0	0	0	0	0	0	0	0	0	0	0	0	0	0	0	0	0	0	0	0	0	0
144.1/4.1 (7861)	144.082	4.09	7861	0	0	0	0	0	28.4044	0	0	0	44.5429	0	0	0	0	0	0	0	33.4537	0	0	0	0	0	0	0	0	0	0	0	0	0	0	0	0	0	0	0	0	0	0	0	0	0	0	0	0
145.0/3.9 (7882)	144.981	3.89	7882	0	0	0	0	0	0	0	0	0	0	0	0	0	0	0	0	0	0	0	0	0	0.590696	0	0	0	0	0	0	0	0	0	0	0	0	0	0	0	0	2.87204	0	0	0	2.02381	0	0	0
145.1/3.5 (7934)	145.096	3.53	7934	0	0	0	0	0	0	20.0616	15.0262	23.5081	0	19.9352	28.5114	12.8457	23.3442	32.1701	81.2789	0	48.5065	0	34.6522	42.8819	23.3379	32.1703	31.1391	54.1309	26.7615	0	43.0307	96.3094	67.6655	0	0	0	14.6256	8.37436	13.4632	117.471	94.7431	48.8843	69.8377	80.8328	0	127.254	79.1638	67.7791	59.1331
145.1/12.2 (7938)	145.122	12.16	7938	326.286	216.616	159.746	225.602	173.327	155.235	0	0	0	0	0	0	0	0	0	239.338	196.241	0	13.7494	0	0	15.6768	15.5781	0	29.6561	0	0	225.161	269.994	163.985	0	0	0	0	0	0	0	0	0	0	0	0	0	0	0	0
146.0/1.0 (7955)	146.027	1	7955	0	0	0	0	0	0	16.9179	15.4345	9.3205	13.6203	10.6767	10.2221	13.5334	0	7.82095	0	0	0	0	0	0	0	0	0	0	0	0	0	0	0	0	0	0	0	0	0	0	0	0	0	0	0	0	0	0	0
146.1/2.5 (7963)	146.059	2.46	7963	0	0	0	817.086	0	0	0	0	0	0	52.7858	9.64079	168.393	0	0	3.27083	2.66122	0	1.61521	0	0	1.55765	2.87009	26.3175	2.10554	0	0	0	0	118.672	0	0	0.317341	0	0	0	0	0	0	0	0	0	0	0	0	0
146.1/2.9 (7964)	146.059	2.85	7964	0	0	780.342	67.377	0	0	0	0	0	0	0	0	0	1075.14	0	0	1362.55	0	0	0	1048.38	0	0	1047.84	0	0	0	0	0	0	0	0	0	0	0	0	0	0	0	0	0	0	0	0	0	0
146.1/3.3 (7965)	146.059	3.33	7965	0	0	2226.8	0	2334.31	0	0	0	0	0	0	0	0	0	0	0	2815.06	0	0	0	1938.79	0	2140.29	2502.28	1944.01	0	0	2681.55	0	2828.15	0	0	0	0	0	0	0	0	0	0	0	0	0	0	0	0
146.1/1.5 (7966)	146.059	1.52	7966	45.8209	34.9707	32.8672	42.3193	6.00741	26.2996	0	3.91235	0	6.67035	65.1477	55.3591	58.54	0	77.807	60.6327	0	0	79.3345	43.9893	46.1644	45.5946	0	0	3.3958	69.2001	114.046	63.5775	31.4632	4.81675	0	0	0	0	0	0	0	0	0	0	0	0	0	0	0	0
146.1/2.0 (7968)	146.059	2.03	7968	0	0	0	6.78578	0	0	0	0	0	82.4918	0	0	7.45808	1.24122	0	0	0	0	0	0	0	0	0	0	0	169.934	0	0	0	0	0	0	0	0	0	0	0	0	0	0	0	0	0	0	0	0
146.1/3.1 (7967)	146.059	3.08	7967	0	0	0	3329.92	10.4713	0	0	0	0	0	13.4159	0	0	23.5193	0	1359.93	0	0	1692.56	0	0	0	1144.35	0	1312.91	28.7512	1857.17	1503.68	0	0	0	0	0	0	0	0	0	0	0	0	0	0	0	0	0	0
146.1/2.3 (7969)	146.06	2.26	7969	0	16.7139	10.106	574.626	187.786	522.274	5.56833	3.82542	34.1652	0	0	15.5823	25.6267	3.07029	8.97854	0	0	0	0	0	0	1.35581	0	4.40956	0	0	0	0	0	218.733	0	0	0	0	0	0	0	0	0	0	0	0	0	0	0	0
146.1/5.1 (7971)	146.06	5.09	7971	0	0	0	0	0	0	58.3712	63.5752	76.4258	91.801	68.8188	119.373	134.716	0	127.55	7.71418	0	0	0	0	53.4295	47.4985	48.0677	46.825	48.2673	0	0	3.78851	6.32742	4.20256	0	0	0	0	0	0	0	0	0	1.75542	0	0	0	0.597494	0	0
146.1/3.2 (7972)	146.06	3.23	7972	5055.3	2161	0	0	0	2579.55	1397.97	1418.19	1440.59	1487.16	1495.84	1403.02	1576.25	1732.24	3097.1	2481.13	0	0	1918.89	1958.47	0	2119.32	0	0	0	2360.58	1458.66	0	4668.48	0	0	0	0	0	0	0	0	0	0	0	0	0	0	0	0	0
146.1/2.6 (7973)	146.06	2.59	7973	0	692.252	0	0	0	0	535.631	458.514	586.205	0	458.857	446.615	193.713	0	1.79584	0	0	0	0	0	0	0	0	0	0	250.257	0	0.996042	0	50.4829	0	0	0	0	0	0	0	0	0	0	0	0	0	0	0	0
146.1/3.5 (7976)	146.06	3.48	7976	0	0	0	0	0	0	9.98956	13.0583	0	0	0	10.0922	0	0	72.442	0	0	0	31.3515	0	0	2037.76	0	0	0	0	44.2507	0	0	0	0	0	0	0	0	0	0	0	0	0	0	0	0	0	0	0
146.1/6.4 (7979)	146.061	6.37	7979	50.0164	18.7844	16.64	0	16.9813	0	81.2651	51.9779	61.4683	120.855	73.4333	81.1769	85.4099	73.0185	96.3368	15.5208	5.18295	10.6723	0	0	0	5.95312	3.23299	0	4.07855	0	0	29.3241	45.0882	29.061	0	0	0	0	0	0	7.89197	9.07452	10.0874	0	2.02267	4.9811	10.3468	1.92914	4.29379	0
146.1/2.3 (7980)	146.061	2.34	7980	0	0	0	0	0	0	0	0	0	6.73659	0	0	0	8.29996	0	0	0	664.713	0	0	0	0	0	2.01173	0	0	0	0	0	13.8685	0	0	0	0	0	0	0	0	0	0	0	0	0	0	0	0
146.1/2.9 (8001)	146.117	2.89	8001	3.4512	0	0	0	0	0	87.7818	106.178	99.9487	96.1436	121.242	107.494	137.215	103.239	135.396	2.75738	0	0	0	0	0	0	0	0	2.59675	0	2.39761	0	0	0	0	0	0	0	0	0	0	0	0	0	0	0	0	0	0	0
146.2/3.0 (8007)	146.166	2.96	8007	0	0	0	0	0	0	17.0126	0	0	12.8586	0	7.88562	0	6.18386	0	0	0	0	0	0	0	0	0	0	0	0	0	0	0	0	0	0	0	0	0	0	0	0	0	0	0	0	0	0	0	0
147.0/3.4 (8036)	147.042	3.39	8036	0	0	0	0	0	0	0	0	0	0	0	4.0139	2.56716	0	0	0	0	0	2.6149	0	0	0	0	0	0	1.42086	0	0	0	2.91413	0	0	0	0	0	0	0	0	0	0	0	0	0	0	0	0
147.0/4.2 (8038)	147.043	4.22	8038	0	0	0	0	0	0	0	1.78017	2.28828	0	0	0	0.604804	0	0	0	0	0	0	0	0	0	0	0	0	0	0	0	0	0	0	0	0	0	0	0	0	0	0	0	0	0	0	0	0	0
147.0/1.1 (8039)	147.043	1.14	8039	942.471	800.046	807.056	1416.42	922.224	914.18	781.517	763.905	733.181	777.471	778.881	764.612	690.046	810.126	824.622	1054.69	683.966	753.684	1055.13	1037.85	812.128	1026.15	750.03	774.557	1078.41	679.34	990.57	1150.39	1177.05	987.114	0	0	0	0	0	0	0	0	0	0	0	0	0	0	0	0
147.0/3.4 (8040)	147.043	3.41	8040	2.74673	0	0	0	0	0	0	1.81441	0	1.79604	2.38295	0	0	0	2.85029	0	0	0	0	0	1.84199	0	0	0	0	0	0	0	0	0	0	0	0	0	0	0	0	0	0	0	0	0	0	0	0	0
147.0/1.4 (8041)	147.043	1.39	8041	91.9485	176.877	315.478	684.41	88.3819	257.869	182.67	172.359	218.305	143.404	245.413	107.01	381.128	219.596	267.18	714.531	546.43	0	743.601	130.772	313.063	406.994	485.165	524.546	638.103	176.974	456.451	559.294	243.122	588.864	0	0	0	0	0	0	0	0	0	0	0	0	0	0	0	0
147.1/4.2 (8045)	147.055	4.17	8045	2.52301	0	0	0	0	0	3.39304	0.778763	0	0	0	1.22123	2.54302	0	2.71678	0	0	0	2.78313	0	0	0	0	0	0	0	0	0	0	0	0	0	0	0	0	0	0	0	0	0	0	0	0	0	0	0
147.1/5.0 (8070)	147.076	5	8070	0	0	0	0	0	4.13203	0	0	0	0	0	0	0	0	0	0	0	0	0	1.96739	0	0	0	0	0	2.90061	0	0	0	2.09539	0	0	0	0	0	0	0	0	0	0	0	0	0	0	0	0
147.1/1.2 (8079)	147.109	1.24	8079	0	0	0	39.2118	21.27	21.6941	0	0	0	0	0	0	0	0	0	0	17.8651	0	0	0	0	12.4546	0	0	0	0	0	0	0	21.3227	0	0	0	0	0	0	0	0	0	0	0	0	0	0	0	0
147.1/3.6 (8094)	147.114	3.64	8094	0	0	0	0	0	0	4.21468	0	0	2.67424	4.33153	0	0	0	15.1515	0	0	0	0	0	0	0	0	0	0	0.301364	0	0	0	0	0	0	0	0	0	0	0	0	0	0	0	0	0	0	0	0
147.1/1.2 (8100)	147.116	1.23	8100	0	0	0	0	0	0	0	0	0	0	0	0	0	0	0	10.5289	0	8.39388	0	8.39593	0	0	0	0	0	0	0	0	0	0	0	0	0	0	0	0	0	0	0	0	0	0	0	0	0	0
148.0/1.2 (8107)	148.044	1.19	8107	0	12.2535	0	0	0	0	0	3.48159	0	0	0	0	0	0	10.0372	0	0	0	0	0	9.32831	0	9.67287	7.11414	0	0	0	0	0	0	0	0	0	0	0	0	0	0	0	0	0	0	0	0	0	0
148.1/1.0 (8115)	148.059	1.02	8115	470.728	688.751	677.168	16.7534	658.171	638.434	647.165	678.323	706.134	0	780.545	734.272	732.939	672.127	638.544	695.547	645.223	0	720.91	967.349	873.752	654.79	923.07	887.656	1123.41	866.451	909.416	528.011	548.73	501.297	0	0	0	0	0	0	0	0	0	0	0	1.32127	0	0	0	0
148.1/3.8 (8126)	148.062	3.84	8126	0	0	0	0	0	0	11.969	0	3.42528	0	0	0	0	0	0	11.8511	0	1.9119	0	0	0	0	3.19303	0	0	0	0	0	0	0	0	0	0	0	0	0	0	0	0	0	0	0	0	0	0	0
148.1/2.4 (8130)	148.073	2.36	8130	0	4.63276	0	0	0	0	0	2.22548	0	1.76116	0	0	0	0	0.878514	0	0	0	0	0	0	0	0	0	0	0	0	0	0	0	0	0	0	0	0	0	0	0	0	0	0	0	0	0	0	0
148.1/1.5 (8137)	148.075	1.48	8137	0	0	0	3.65576	0	0	0	0	0	0	0	0	0	0	0	0	0	0	6.42704	0	0	12.4059	0	0	0	0	1.7268	0	9.11978	0	0	0	0	0	0	0	0	0	0	0	0	0	0	0	0	0
148.1/3.5 (8140)	148.075	3.55	8140	0	0	0	0	0	0	28.3295	28.4171	28.4651	26.5355	20.6287	36.3906	22.0214	33.0335	48.4869	123.102	97.1098	81.9074	66.8482	47.3441	74.2669	61.3215	51.8801	62.3698	99.5175	60.4551	36.0072	90.549	152.539	109.69	0	0	0	30.0343	12.8631	25.2638	190.405	170.241	104.834	114.499	129.572	0	202.337	134.08	114.15	118.947
148.1/3.8 (8141)	148.075	3.79	8141	0	0	0	0	0	0	34.7919	34.553	39.5018	24.6773	0	18.9192	21.3038	0	48.2121	21.8183	0	0	0	10.5568	24.0052	16.712	0	0	23.3916	0	0	14.665	16.7275	0	0	0	0	0	0	0	57.921	47.9459	71.7899	51.8856	40.3875	0	55.7359	0	66.3767	94.3221
148.1/2.5 (8152)	148.079	2.52	8152	0	0	0	0	0	0	0	0	0	0	0	0	0	0	0	0	0	0	0.521382	1.86357	0	0	0	0	0	0	0	0	2.33332	0	0	0	0	0	0	0	0	0	0	0	0	0	0	0	0	0
148.1/1.2 (8155)	148.095	1.15	8155	0	0	0	0	0	0	0	0	16.2519	0	0	0	13.7322	0	18.277	0	0	0	12.5094	0	24.8897	31.9885	20.8977	0	33.7932	32.7204	0	21.9359	25.0469	0	0	0	0	0	0	0	0	0	0	0	0	0	0	0	0	0
148.1/1.1 (8156)	148.096	1.14	8156	0	0	9.21222	0	0	0	20.3266	18.5424	0	0	0	18.0803	4.55471	24.5124	0	0	0	0	0	0	0	0	0	20.708	0	0	0	0	0	13.6383	0	0	0	0	0	0	0	0	0	0	0	0	0	0	0	0
148.1/1.4 (8157)	148.097	1.4	8157	3.75506	3.07213	0	1.59103	1.93112	1.47008	0	0	0	0	0	0	0	0	0	0	4.87759	0	14.2732	0.93213	7.77416	0	0	19.7423	0	9.71963	19.3629	0	0	0	0	0	0	0	0	0	0	0	0	0	0	0	0	0	0	0
148.1/1.2 (8158)	148.114	1.21	8158	0	4.27811	3.76098	0	0	4.3251	0	0	0	0	0	0	0	0	0	2.25536	0	0	0	1.77825	0	0	0	0	0	0	0	0	0	0	0	0	0	0	0	0	0	0	0	0	0	0	0	0	0	0
149.0/6.6 (8169)	149.02	6.59	8169	0	0	0	0	0	0	0	0	0	0	0	0	0	0	0	0	0	0	0	0	0	0	0	0	0	0	2.86629	1.69181	0	0	0	0	0	0	0	0	0	0	0	0	0	0	0	0	0	0
149.0/13.7 (8178)	149.021	13.66	8178	65.2794	0	0	0	0	0	0	0	8.65975	0	0	0	0	0	0	0	0	0	0	0	29.146	0	36.1956	0	49.3316	24.5941	0	0	0	1.26476	0	0	0	0	0	0	0	0	0	0	0	0	0	0	0	0
149.0/3.3 (8181)	149.022	3.32	8181	0	0	2.61004	0	0	0	0	0	0	0	5.34247	0	0	5.21077	0	7.35995	0	0	0	0	0	3.23188	2.47302	6.80906	3.33556	2.3319	1.6971	0	0	0	0	0	0	0	0	0	0	0	0	0	0	0	0	0	0	0
149.0/14.0 (8194)	149.023	13.98	8194	142.151	34.3456	39.1752	0	25.0342	20.8215	0	24.2465	33.7255	22.372	47.1291	34.4942	33.8766	32.1521	13.2977	23.3909	37.4046	0	15.812	18.5939	29.6017	22.9322	38.5875	18.8022	22.2062	16.6209	13.9083	27.3508	22.2137	25.8761	18.4151	39.505	17.214	27.3078	9.47323	32.2761	24.8639	29.3119	17.3025	20.116	30.7417	27.1725	34.5367	46.6758	30.5611	5.85131
149.0/14.5 (8196)	149.023	14.51	8196	243.698	144.03	187.065	134.186	122.001	105.827	127.092	138.944	168.749	0	147.049	132.986	176.427	124.679	102.771	135.876	140.833	0	71.6606	95.973	127.362	72.8283	171.238	136.584	136.025	97.2014	64.4308	122.6	132.526	97.5025	94.4179	164.99	133.473	127.925	120.077	117.199	140.929	123.326	127.666	166.56	118.706	140.395	142.663	168.917	140.761	129.747
149.0/4.5 (8205)	149.024	4.46	8205	0	4.2912	0	0	8.22235	0	0	0	0	3.40943	3.63098	0	0	0	1.68976	0.710196	0	0	2.34328	0	0	10.4309	0	2.52768	0	0	0	0	8.69995	0	0	0	0	0	0	0	0	0	0	0	0	0	0	0	0	0
149.0/5.0 (8208)	149.024	4.95	8208	0	0	0	0	3.09516	3.43834	0	0	0	0	0	0	0	0	0	0	2.13475	6.47969	0	0	0	0	0	0	0	0	0	0	0	0	0	0	0	0	0	0	0	0	0	0	0	0	0	0	0	0
149.0/14.0 (8210)	149.025	14.03	8210	0	0	0	0	0	0	32.6186	0	0	0	0	0	0	0	0	0	0	30.3301	0	0	0	0	0	0	0	0	0	0	0	0	0	4.11454	0	0	0	0	0	0	0	0	0	0	0	0	0	0
149.0/3.3 (8214)	149.026	3.33	8214	0	0	0	0	0	0	0	3.66922	11.5647	0	0	0	1.21788	4.64229	0	0	0	0	0	0	0	0	0	0	0	0	0	0	0	0	0	0	0	0	0	0	0	0	0	0	0	0	0	0	0	0
149.1/7.8 (8224)	149.059	7.83	8224	60.9525	73.7199	105.265	34.6831	80.8884	62.6525	80.0085	77.0147	104.69	0	99.1083	80.5743	82.5029	49.0839	67.6634	71.6081	75.6738	0	45.985	52.9576	53.4879	43.9336	82.4094	54.5132	50.2183	51.0732	49.8318	71.2822	60.6401	95.6943	80.5982	86.0003	91.6646	73.3831	67.7377	73.3295	67.0303	72.1226	74.4445	59.7998	65.268	70.715	60.0783	82.809	73.6958	81.3002
149.1/2.7 (8227)	149.059	2.69	8227	0	0	540.36	0	575.815	0	0	0	0	0	0	0	0	0	354.681	716.51	778.576	0	0	440.968	475.681	0	700.552	714.898	770.528	0	712.851	727.682	0	796.614	0	0	0	0	0	0	0	0	0	0	0	0	0	0	0	0
149.1/2.6 (8228)	149.059	2.59	8228	0	0	0	0	0	460.901	0	0	342.041	292.064	293.788	227.697	349.684	399.861	0	0	0	0	0	6.86052	0	0	0	0	0	511.924	0	0	0	0	0	0	0	0	0	0	0	0	0	0	0	0	0	0	0	0
149.1/1.8 (8231)	149.059	1.76	8231	548.499	5.34723	0	0	0	0	0	0	0	4.69863	0	0	0	0	237.949	0	0	0	0	0	2.40473	0	0	0	0	3.70804	12.8587	0	0	0	0	0	0	0	0	0	0	0	0	0	0	0	0	0	0	0
149.1/13.2 (8232)	149.059	13.18	8232	54.7775	60.6529	23.1193	16.6578	30.5266	15.7318	67.3477	75.7247	68.8032	0	92.1964	77.41	48.7588	26.4355	36.932	50.496	27.336	0	13.0574	20.7792	28.4261	7.56912	34.3068	21.7411	23.7135	19.2811	8.95435	25.5923	12.3781	22.2368	20.2138	80.6472	70.5801	69.2618	50.5899	38.1059	64.6522	60.9699	62.9216	60.6514	51.9187	60.9744	69.6105	77.9409	71.2756	63.4812
149.1/2.8 (8235)	149.06	2.8	8235	0	0	0	0	0	0	0	0	0	0	0	0	0	0	0	0	0	0	974.684	0	0	7.18477	0	0	0	0	0	0	579.927	0	0	0	0	0.556371	0	0	0	0	0	0	0	0	0	0	0	0
149.1/2.4 (8238)	149.061	2.44	8238	0	0	0	0	0	0	0	0	0	3.63125	0	0	0	0	0	0	0	442.105	0	0	0	0	0	0	0	4.45121	0	0	0	0	0	0	0	0	0	0	0	0	0	0	0	0	0	0	0	0
149.1/8.3 (8249)	149.097	8.33	8249	0	0	0	0	0	0	3.9951	0	2.00132	1.03927	0	8.84129	0	0	9.52567	0	0	0	0	0	0	0	0	0	0	0	0	0	0	0	0	0	0	0	0	0	0	1.55555	1.88841	0	0	0	0	1.09547	0	0
149.1/14.6 (8255)	149.133	14.64	8255	0	0	0	0	0	0	0	0	0	0	0	0	0	0	0	0	0	0	0	0	0	0	0	0	0	0	1.97295	0	0	0	0	0	0	0	0	0	0	0	0	0	0	4.21638	0	1.52851	0	3.60695
150.0/1.1 (8268)	150.019	1.1	8268	0	0	0	0	0	0	793.783	451.304	0	0	484.983	0	0	0	0	0	0	0	0	0	0	0	0	0	0	0	0	0	0	0	0	0	0	0	0	0	0	0	0	0	0	0	0	0	0	0
150.0/2.3 (8267)	150.019	2.29	8267	0	0	0	0	0	0	662.905	587.806	580.455	0	625.917	381.389	262.421	0	355.245	0	0	0	0	0	0	0	0	0	0	0	0	0	0	0	0	0	0	0	0	0	0	0	0	0	0	0	0	0	0	0
150.1/1.1 (8277)	150.054	1.06	8277	0	0	0	0	0	0	0	0	0	0	0	0	26.5141	28.3377	0	0	0	0	10.6149	0	0	0	14.7205	15.0031	15.8278	0	0	0	0	0	0	0	0.370571	0	1.22734	0	111.938	106.586	102.357	4.21782	4.48672	6.77288	2.80237	1.34541	1.83309	0
150.1/8.0 (8285)	150.057	8	8285	0	0	0	1.68817	0	0	3.36139	0	4.21041	5.56361	0	0	0	3.2657	0	0	0	0	0	0	0	0	0	0	0	0	0	0	0	0	0	0	0	0.437697	0	0	0	0	0	0	0	0	0	0	0	0
150.1/1.1 (8297)	150.058	1.14	8297	13362.2	9000.95	9452.98	8260.26	9491.99	8875.85	7476.34	7289.72	7381.65	7477.59	7377.28	7165.37	6496.08	7992.14	8501.11	10378.9	9895.41	0	9207.22	8375.23	8514.48	9161.72	9290.07	8884.21	10248.5	8790.24	10450.1	10078.2	12014.8	8717.94	0	0	0	0	0	0	0	0	0	2.86725	0	0	0	2.05445	0	0
150.1/3.8 (8298)	150.058	3.79	8298	0	0	0	0	0	0	0	11.3228	0	0	0	0	0	0	14.7044	0	0	0	0	0	0	0	7.15934	0	4.72049	0	0	0	0	0	0	0	0	0	0	0	0	0	0	0	0	0	0	0	0	0
150.1/1.0 (8318)	150.076	1.01	8318	0	0	0	0	0	0	0	0	63.7258	0	0	0	0	0	0	0	0	0	9.42899	0	19.0862	18.1255	7.32868	14.0976	0	24.413	0	0	0	0	0	0	0	0	0	0	104.162	94.8273	83.5187	83.8294	77.1886	64.32	126.709	67.7464	74.058	0
151.0/1.5 (8332)	150.986	1.45	8332	1.40076	0	0	0	0	0	0	0	0	0	0	0	0	0	0	1.15912	2.47595	0	0	0	0	0	0	0	0	0	0	3.28364	5.623	0	0	0	0	0	0	0	0	0	0	0	0	0	0	0	0	0
151.0/1.5 (8333)	151	1.49	8333	0	0	0	0	0	0	0	0	0	0	0	0	0	0	0	0	0	0	0	8.5092	14.7945	0	8.50455	0	0	3.98513	0	0	0	0	0	0	0	0	0	0	0	0	0	0	0	0	0	0	0	0
152.0/1.3 (8360)	152.018	1.27	8360	0	0	0	0	0	0	0	0	0	5.98917	0	0	1.3011	0	0	0	0	0	0	0	0	0	0	0	0	0	0	0	0.86421	0	0	0	0	0	0	0	0	0	0	0	0	0	0	0	0	0
152.0/1.1 (8365)	152.031	1.12	8365	0	0	0	0	0	0	233.026	0	0	0	0	0	0	0	0	398.295	0	0	0	0	0	0	0	0	0	0	0	0	101.223	320.688	0	0	0	0	0	0	0	1.37513	0	0	0	0	0	0	0	0
152.0/1.2 (8366)	152.031	1.23	8366	0	2.64181	0	0	5.67144	0	0	0	0	0	0	0	0	0	6.81385	0	0	0	0	3.01152	0	0	0	0	0	0	0	0	0	0	0	0	0	0	0	0	0	0	0	0	0	0	0	0	0	0
152.1/1.2 (8373)	152.053	1.24	8373	0	0	0	0	0	28.0293	17.8615	0	0	0	0	0	25.3416	0	0	0	0	0	0	30.3253	23.488	0	34.4803	0	72.7872	0	65.9833	0	0	0	0	0	0	0	0	0	0	0	0	0	0	0	0	0	0	0
152.1/1.1 (8376)	152.056	1.11	8376	0	56.9504	43.6736	666.569	0	720.705	562.002	623.077	591.312	463.299	596.676	581.684	63.9303	568.654	0	1052.5	0	904.476	204.477	0	84.4864	27.6367	0	5.89678	75.5526	54.8668	52.6534	0	1899.06	1395.24	0	0	0	0	0	0	0	0	0	0	0	0.784242	0	0	0	0
152.1/1.6 (8378)	152.056	1.6	8378	0	0	33.8829	0	22.7043	0	0	66.4832	41.5885	0	84.2697	21.8361	70.2589	0	0	213.25	256.615	0	135.794	0	59.6418	36.4358	145.052	70.609	0	0	0	212.674	185.968	389.166	0	0	0	0	0	0	0	0	0	0	0	0	0	0	0	0
152.1/1.1 (8387)	152.07	1.11	8387	0	0	0	0	0	0	0	0	0	0	0	0	0	0	0	0	0	0	0	0	0	0	0	0	0	0	0	0	0	0	0	0	0	0	0	0	236.944	277.796	302.303	0	0	0.663283	0	0	0	0.696359
153.0/1.2 (8393)	153.038	1.16	8393	0	0	0	0	0	3.50684	0	5.37934	0	0	0	1.01381	7.12194	0	0	0	15.029	0	0	0	3.32277	0	29.3882	24.4274	0	0	0	0	0	0	0	0	0	0	0	0	0	0	0	0	0	0	0	0	0	0
153.0/1.2 (8396)	153.04	1.19	8396	5.15105	0	0	0	0	0	0	0	0	0	15.381	4.6342	3.85818	0	12.5303	0	0	16.7696	25.0059	16.3564	4.07794	19.1583	0	0	9.52811	30.0417	31.6283	0	14.2673	0	0	0	0	0	0	0	0	0	0	0	0	0	0	0	0	0
153.1/4.9 (8402)	153.053	4.92	8402	0	0	0	0	0	0	0	0	0	0	0	0	0	0	0	0	0	0	0	0	195.994	70.828	48.4333	66.6148	737.779	0	0	0	0	0	0	0	0	0	0	0	0	0	0	0	0	0	0	0	0	0
153.1/4.8 (8403)	153.054	4.79	8403	0	0	0	0	0	0	0	0	0	0	0	0	0	0	0	0	0	0	251.68	11.3542	0	0	0	0	0	320.839	531.68	0	0	0	0	0	0	0	0	0	0	0	0	0	0	0	0	0	0	0
154.0/3.6 (8431)	153.994	3.63	8431	17.9801	32.6072	44.1015	0	58.4582	0	0	4.74409	9.42053	55.2593	0	17.6156	45.278	0	0	38.9669	70.6152	0	50.9744	42.4672	0	0	12.7432	64.9509	58.3177	41.0597	69.92	63.4991	62.2261	0	0	0	0	0	0	0	0	0	0	0	0	0	0	0	0	0
154.0/4.2 (8433)	153.995	4.2	8433	0	0	22.249	0	25.2283	10.9722	49.8198	0	0	0	0	0	0	0	0	0	49.0776	0	0	53.1231	51.4183	73.4883	81.0884	74.42	0	0	0	0	0	0	0	0	0	0	0	0	0	0	0	0	0	0	0	0	0	0
154.0/4.0 (8434)	153.995	4.04	8434	19.6586	33.8681	1.89906	0	0	0	0	53.491	63.0096	0	67.2324	47.3675	77.2059	0	48.8045	71.8128	0	0	63.7345	0	0	0	0	0	81.8161	59.8489	81.4156	49.5866	24.175	5.12686	0	0	0	0	0	0	0	0	0	0	0	0	0	0	0	0
154.0/4.1 (8436)	153.997	4.15	8436	0	0	0	0	0	2.99862	0	0	0	69.2467	0	0	0	0	0	0	0	61.6601	0	0	0	0	0	0	0	0	0	0	0	0	0	0	0	0	0	0	0	0	0	0	0	0	0	0	0	0
154.0/1.3 (8439)	153.999	1.26	8439	0	0	0	0	0	0	0	0	0	247.628	0	0	84.7073	245.227	5.56314	0	0	0	0	0	0	0	0	0	0	0	0	0	0	0	0	0	0	0	0	0	0	0	0	0	0	0	0	0	0	0
154.1/1.1 (8443)	154.05	1.12	8443	0	0	0	0	0	0	0	0	0	0	0	0	0	0	0	0	0	0	0	0	0	0	0	0	0	0	0	0	0	0	0	0	0	0	0	0	0	0	0	35.6798	33.4693	36.9355	50.9636	21.2632	32.6222	0
154.1/1.5 (8448)	154.082	1.54	8448	70.8673	44.4846	0	0	0	0	0	34.5362	0	0	0	0	0	0	16.5265	0	28.8044	0	0	29.2076	0	0	9.17105	0	49.3532	0	31.8204	41.9285	4.05853	4.87651	0	0	0	0	0	0	0	0	0	0	0	0	0	0	0	0
155.0/1.0 (8467)	155.046	1.02	8467	3.22298	0	0	0	1.30167	0	103.074	77.5437	81.7708	63.9648	49.7284	152.923	133.325	180.717	117.108	5.49845	7.82374	0	12.485	0	14.5065	0	12.4463	8.16163	0	12.5	16.7833	0	0	0.161892	0	0	0	0	0	0	0	0	0	1.19445	0	0	0	0	0	0
155.0/13.9 (8468)	155.048	13.87	8468	0	0	0	0	5.50593	0	7.25642	0	0	0	0	0	0	0	0	0	0	8.66306	0	0	0	0	0	0	0	0	0	0	0	0	0	0	0	0	0	0	0	0	0	0	0	0	0	0	0	0
155.1/2.0 (8473)	155.08	1.96	8473	0	0	0	0	0	0	28.6806	27.3888	0	0	40.8943	0	0	0	0	0	34.0117	0	0	0	13.7185	0	0	0	0	0	0	0	0	37.8749	0	0	0	0	0	0	0	0	0	0	0	0	0	0	0	0
155.1/7.9 (8482)	155.105	7.92	8482	8.78834	9.14261	7.58632	0	4.62631	4.92674	3.14961	0	13.9007	0	12.144	0	11.2263	3.25653	14.4515	7.21999	9.176	3.40509	3.88855	4.29295	13.5231	3.42989	18.2532	9.25777	11.2566	3.23631	6.24018	2.72499	9.86829	13.294	13.9037	13.5121	9.13721	5.16593	5.98416	5.42968	7.25817	10.5582	7.36942	11.9717	7.91918	8.17463	8.64448	13.2633	9.72453	6.94405
156.0/1.0 (8491)	156.024	1.01	8491	16.918	0	0	0	0	0	0	0	9.94922	0	11.6774	0	8.69617	0	8.18216	0	0	0	0	8.04949	8.14756	0	17.7675	0	12.3951	5.8421	15.6255	0	0	0	0	0	0	0	0	0	0	0	0	0	0	0	0	0	0	0
156.0/12.9 (8504)	156.041	12.93	8504	0	0	0	0	0	0	0	2.99687	0	0	0	0	0	0	0	0	0	0	0	0	0	0	0	0	0	0	0	0	0	0	0	0	0	0	0	3.62662	0	0	0	0	0	0	4.44011	0	4.07179	0
156.0/12.6 (8512)	156.042	12.55	8512	0	0	0	0	0	0	0	0	0	0	0	2.79426	0	0	0	0	0	0	0	0	0	0	0	0	0	0	0	0	0	0	0	0	0	0	0	0	0	0	0	5.11164	0	0	0	1.57732	0	0
156.0/3.7 (8513)	156.042	3.68	8513	0	0	0	0	0	0	0	0	0	0	0	0	0	0	0	0	0	0	0	0	0	0	0	0	0	0	0	0	0	0	0	0	0	0	0	0	5.0543	2.90533	0	9.5724	0	0	2.95561	0	0	4.66536
156.0/3.9 (8524)	156.043	3.92	8524	0	0	0	0	0	0	0	0	0	0	0	0	0	0	0	0	0	0	0	0	0	0	0	0	0	0	0	0	0	0	0	0	0	0	0	0	6.28896	0	0	0	3.80067	5.77719	0	0	0	20.9192
156.0/14.5 (8526)	156.045	14.49	8526	0	0	0	0	0	0	0	0	0	0	0	3.22262	0	0	0	0	0	0	0	0.476676	0	0	0	0	0	0	0	0	0	0	0	0	0	0	0	0	0	0	0	0	4.85047	0	0	5.34731	0	0
156.1/5.4 (8538)	156.076	5.39	8538	2.56248	0	0	0	0	0	0	3.56366	0	0	0	3.49139	3.80557	0	0	0	0	0	36.6817	0	0	2.31714	0	3.46033	0	0	24.2893	0	0	3.78815	0	0	0	0	0	0	0	0	0	0	0	0	0	0.721699	0	0
156.1/3.0 (8540)	156.076	2.97	8540	0	3.18901	0	0	0	0	0	0	0	0	0	0	0	0	0	0	0	0	0	0	0	0	0	0	8.25559	0	0	0	7.70697	8.3081	0	0	0	0	0	0	0	0	0	0	0	0	0	0	0	0
157.0/1.3 (8569)	157.009	1.29	8569	0	4.95749	0	0	0	0	0	0	0	0	0	0	0	0	2.80643	0	2.61627	0	0	0	0	0	2.5487	4.71338	0	7.42254	0	1.79371	2.32882	8.31152	0	0	0	0	0	0	0	0	0	0	0	0	0	0	0	0
157.0/1.0 (8570)	157.01	1.05	8570	39.676	40.6579	24.4643	0	18.404	0	111.159	122.509	128.291	0	166.406	169.802	162.199	175.16	151.371	50.1587	46.9631	0	85.2402	104.437	114.366	117.373	82.6348	88.9143	119.349	84.0842	117.034	50.4618	0	0	0	0	0	0	0	0	0	0	1.35502	0	2.98066	5.60314	9.7354	2.22799	0	0
157.1/1.9 (8578)	157.077	1.88	8578	0	0	0	0	0	0	0	0	4.76249	34.3623	5.27241	0	0	1.53508	0	0	0	1.92661	8.46801	0	0	0	0.478428	5.85529	0	0	0	0	0	3.25325	0	0	0	0	0	0	0	0	0	0	0	0	0	0	0	0
157.1/3.7 (8608)	157.085	3.69	8608	0	0	0	0	0	0	0	0	0	0	0	0	0	0	0	0	0	0	0	0	0	0	0	0	0	0	0	0	0	0	0	0	0	0	0	0	1.96771	0	0	0	0	0	1.03792	10.7866	0	2.39865
157.1/1.9 (8618)	157.096	1.94	8618	0	0	0	0	0	0.847992	5.59982	13.7426	12.5993	0	15.6666	12.9587	13.1623	0	18.4757	0	0	0	0	0	0	0.867027	0	0	0.550294	0	0.985578	0	0	0	0	0	0	0	0	0	0	0	0	0	0	0	0	0	0	0
157.1/4.4 (8620)	157.096	4.4	8620	39.4537	7.96344	0	13.8684	0	0	0	0	0	0	0	0	0	0	0	0	0	0	0	0	0	0	0	0	0	0	0	0	0	0	0	0	0	0	0	0	0	0	0	0	0	0	0	0	0	0
157.1/4.7 (8622)	157.097	4.7	8622	0	26.4533	22.3998	0	0	24.715	22.1313	0	55.1784	0	33.6764	18.6608	0	42.1939	94.2867	0	0	0	0	0	0	0	0	0	0	0	0	0	0	0	0	0	0	0	0	0	0	0	0	0	0	0	0	0	0	0
157.1/1.1 (8624)	157.097	1.12	8624	8.04377	0	0	16.0358	0	0	0	0	0	0	0	14.8786	0	15.2771	12.9478	0	0	0	0	0	0	0	0	0	7.18214	0	3.29327	0	0	0	0	0	0	0	0	0	4.65819	3.60701	3.039	0	0	0	0	0	0	0
157.1/1.1 (8628)	157.099	1.12	8628	0	0	3.26879	0	0	0	0	11.4254	0	0	0	0	2.42811	0	0	0	2.46961	0	0	0	0	0	0	0	0	0	0	0	0	0	0	0	0	0	0	0	0	0	0	0	0	0	0.707777	0	0.898874	0
158.1/1.9 (8653)	158.059	1.91	8653	0	0	2.33747	0	0	0	4.14034	3.97958	0	0	0	0	3.09393	0	0	0	0	0	0	0	0	0	0	9.53577	8.35551	0	0	0	0	4.34141	0	0	0	0	0	0	0	0	0	0	0	0	0	0	0	0
158.1/1.5 (8654)	158.059	1.47	8654	9.55494	1.59293	0	0	0	0	0	0	2.8584	0	1.55885	2.29666	2.90237	0	6.00892	0	0	0	0	0	1.63171	0	0	3.22243	3.14246	6.39672	2.51437	0	0	0	0	0	0	0	0	0	0	0	0	0	0	0	0	0	0	0
158.1/3.9 (8662)	158.08	3.86	8662	0	0	0	0	0	0	0	0	0	0.737498	0	0	2.14737	0	0	0	0	0	13.9267	15.1312	0	0	0	0	0	21.5747	37.1104	0	0	0	0	0	0	0	0	0	0	0	0	0	0	0	0	0	0	0
158.1/3.0 (8670)	158.082	3.02	8670	0	0	0	0	0	0	7.69468	2.78431	6.93604	29.4134	0	0	14.4865	5.0949	36.284	0	0	0	4.74914	2.18942	0	0	0	0	12.2619	0	8.64965	0	0	0	0	0	0	0	0	0	0	0	0	0	0	0	0	0	0	0
158.1/1.1 (8677)	158.091	1.11	8677	247.932	0	0	0	0	0	36.7054	76.905	81.5231	0	50.5958	95.8936	58.3877	0	155.339	59.5025	0	0	405.303	0	124.224	440.128	425.21	0	109.072	51.9176	425.9	106.071	404.722	107.701	0	0	0	0	0	0	0	0	23.8517	0	12.2012	0	129.602	0	30.0456	0
158.1/1.1 (8679)	158.094	1.12	8679	0	0	0	74.3933	0	0	0	0	0	0	0	0	0	88.6666	0	0	44.4982	7.56483	0	0	0	0	0	0	0	0	0	0	0	0	0	0	0	0	0	0	0	0	0	0	0	0	0	0	0	0
158.1/4.4 (8681)	158.096	4.37	8681	2.93436	0	0	0	0	0	32.858	40.5845	49.7436	0	75.6037	62.0932	52.5693	86.6007	109.069	4.03219	0	0	0	0	2.79304	0	0	1.39342	10.6976	0	15.0285	0	0	0	0	0	0	0	0	0	0	0	0	0	0	0	0	0	0	0
158.1/1.1 (8689)	158.117	1.15	8689	198.128	163.074	139.749	100.277	124.897	5.74066	0	88.3764	120.513	59.7729	92.9933	80.9671	66.7155	94.3699	130.259	214.404	188.293	0	296.874	240.125	258.338	409.651	391.511	331.088	249.636	237.803	245.842	138.087	273.46	201.936	0	0	0.746987	0	0	0	0	0	5.79662	0	8.0256	10.4823	12.9002	6.23268	12.5381	0.465802
158.1/1.1 (8690)	158.119	1.09	8690	0	0	0	0	0	94.0608	84.0197	0	0	0	0	0	0	0	0	0	0	166.663	0	0	0	0	0	0	0	0	0	0	0	0	0	0	0	0	0	0	0	0	0	5.64655	0	0	0	0	0	0
158.2/11.5 (8691)	158.154	11.47	8691	67.4767	0	0	0	0	0	0	1.35976	0	0	3.70699	0	0	0	0	0	0	0	0	0	0	0	0	0	0	0	0	0	0	0	0	3.22851	0	0	0	0	1.25271	0	0	0	0	0.611621	2.40546	2.79499	2.6414	0
159.0/3.9 (8699)	158.958	3.91	8699	0	0	0	0	0	0	0	0	0	0	0	0	0	0	0	0	0	0	0	0	0	0	0	0	0	0	0	0	0	0	0	0	0	0	0	0	0	1.97353	4.43752	0	0	0	0	0	0	0
159.0/5.3 (8701)	158.958	5.35	8701	0	0	0	0	0	0	0	2.45642	0	0	0	0	0	0	0	1.37248	0	0	0	0	0	0	0	0	1.84165	4.95324	0	0	4.22592	0	0	0	0	0	0	0	0	0	0	0	0	0	0	0	0	0
159.0/3.9 (8712)	158.96	3.91	8712	3.89906	0	2.23236	0	0	0	0	4.01456	1.81653	0	0	0	0	0	2.54793	0	0	0	0.919862	0	2.05578	0	1.8609	3.69012	0	0	0	0	0	0	0	0	0	0	0	0	0	0	0	0	0	0	0	0	6.57261	0
159.0/4.2 (8724)	158.963	4.18	8724	0	0	0	0	0	0	0	0	0	0	0	0	0	0	0	0	2.79768	3.55554	0	0	0	0	0	0	0	0	0	0	3.68749	0	0	0	0	0	0	0	0	0	0	0	0	0	0	0	0	0
159.0/1.5 (8736)	159.013	1.51	8736	0	0	0	0	0	0	0	0	5.09312	0	2.40254	3.51324	25.3967	0	0	0	0	0	0	0	0	0	0	0.18158	0	0.993711	0	0	0	0.973226	0	0	0	0	0	0	0	0	0	0	0	0	0	0	0	0
159.1/3.4 (8741)	159.076	3.35	8741	0	0	0	0	0	0	12.0306	5.95918	9.86225	0	0	14.8332	4.96301	0	8.21407	0	0	0	0	0	0	0	0	0	0	0	0	0	0	0	0	0	0	0	0	0	0	0	0	0	0	0	0	0	0	0
159.1/5.0 (8746)	159.09	4.98	8746	0	0	2.49611	0	0	0	0	0	0	0	0	0	0	0	4.83369	12.4824	5.4783	4.42636	0	0	2.0015	0	0	2.40323	0	0	0	9.82749	8.0561	0	0	0	0	0	0	0	0	0	0	0	0	0	0	0	0	0
159.1/2.3 (8750)	159.09	2.32	8750	0	6.17329	1.832	332.504	114.713	283.47	0	0	0	0	1.80414	3.15814	0	0	0	0	0	0	0	0	0	0	0	7.91474	0	0	0	0	0	150.476	0	0	0	0	0	0	0	0	0	0	0	0	0	0	0	0
159.1/2.5 (8751)	159.09	2.53	8751	0	402.999	0	583.147	144.244	28.6677	355.604	302.739	0	0	0	0	0	0	0	0	0	0	0	0	0	0	0	0	0	0	0	0	0	94.1295	0	0	0	0	0	0	0	0	0	0	0	0	0	0	0	0
159.1/2.9 (8748)	159.09	2.86	8748	0	12.5653	468.238	0	0	0	0	0	0	0	0	0	0	0	0	0	840.494	0	0	0	615.528	0	0	494.527	0	194.446	0	0	0	0	0	0	0	0	0	0	0	0	0	0	0	0	0	0	0	0
159.1/6.8 (8749)	159.09	6.79	8749	0	0	0	0	0	0	0	0	0	0	0	0	0	0	0	0	0	0	0	0	0	0	0	0	0	0	0	0	0	0	0	0	0	0	0	0.592773	0	0	0	0	1.48896	0	0	0	6.00741	0
159.1/3.1 (8752)	159.091	3.07	8752	0	72.4962	0	2059.34	0	0	19.5374	6.61756	18.3034	0	0	0	0	0	0	804.344	0	0	1088.04	7.85596	0	0	712.788	0	824.9	67.5121	1149.71	958.294	6.89906	0	0	0	0	0	0	0	0	0	0	0	0	0	0	0	0	0
159.1/3.3 (8753)	159.091	3.25	8753	3260.63	1370.46	1444.53	0	1568.9	1646.21	822.405	856.769	908.109	910.015	977.943	834.372	946.798	1061.9	1927.27	1675.18	1855.92	0	1361.3	1181.02	1287.57	1364.34	1453.52	1544.79	1260.8	1466.82	988.726	1714.86	3067.75	1857.21	0	0	0	0	0	0	0	0	0	0	0	0	0	0	0	0
159.1/2.7 (8755)	159.092	2.75	8755	0	0	9.85369	0	0	0	0	0	375.547	0	342.946	299.843	212.857	651.791	0.646369	3.01639	0	0	0	0	0	0	0	179.742	0	19.4384	0	0	0	0	0	0	0	0	0	0	0	0	0	0	0	0	0	0	0	0
159.1/2.0 (8756)	159.092	2.02	8756	0	0	0	0	0	0	0	0	0	116.029	0	0	8.42773	0	0	0	0	0	0	0	0	0	0	0	0	120.902	0	0	0	0	0	0	0	0	0	0	0	0	0	0	0	0	0	0	0	0
159.1/2.3 (8757)	159.093	2.31	8757	0	0	3.17508	0	0	0	2.12764	0	0	0	0	0	0	0	0	0	0	382.07	0	0	0	0	0	0	0	0	0	0	0	0	0	0	0	0	0	0	0	0	0	0	0	0	0	0	0	0
159.1/3.0 (8758)	159.094	3.03	8758	0	0	0	0	0	0	0	0	0	45.9932	0	2.41886	0	21.3237	0	0	0	0	0	7.26866	0	0	0	0	0	0	0	0	0	0	0	0	0	0	0	0	0	0	0	0	0	0	0	0	0	0
160.0/1.0 (8775)	160.034	1	8775	312.429	180.468	196.602	147.701	337.683	278.245	226.736	196.083	171.7	0	193.497	167.214	133.747	215.31	181.905	365.576	278.263	0	277.497	260.729	221.384	285.955	382.992	319.959	269.918	276.875	175.927	249.995	419.83	282.598	0	0	0	0	0	0	0	0	0	0	0	0	0	0	0	0
160.0/4.3 (8782)	160.04	4.3	8782	0	0	0	0	0	0	0	0	0	0	0	0	0	0	0	0	0	0	0	0	0	0	0	0	0	0	0	0	0	0	0	0	0	0	0	0	21.4098	0	25.4921	0	6.74932	0	21.3664	0	7.34317	13.8621
160.0/6.7 (8783)	160.04	6.72	8783	0	0	0	0	22.1114	0	0	0	0	0	165.807	26.0077	125.328	0	0	0	0	27.444	0	90.3342	266.734	0	300.418	0	0	144.087	0	0	0	0	0	0	0	0	0	23.0981	308.897	0	0	0	475.35	564.026	0	0	0	0
160.0/6.6 (8785)	160.041	6.59	8785	0	0	0	0.523301	60.3481	56.9338	0	0	0	0	0	164.208	0	0	0	0	269.53	0	0	0	0	0	0	178.619	0	75.0419	0	309.614	427.005	78.4638	0	0	0	0	0	32.6353	38.3761	0	42.2176	15.6031	0	24.1896	575.125	15.9026	21.0735	40.9146
160.0/3.0 (8786)	160.041	3.03	8786	0	0	0	0	0	0	2.35172	8.33871	0	0	15.2276	0	21.5795	0	13.13	0	0	0	11.7693	0	0	0	0	0	0	16.5602	0	0	2.77358	160.622	0	0	0	0	73.9791	68.6727	124.347	204.79	193.44	51.1229	72.3859	54.393	199.764	96.8195	115.634	230.038
160.0/2.8 (8789)	160.042	2.78	8789	0	0	0	0	0	0	0	0	0	1.55752	0	0	0	0	0.353619	0	0	0	0	0	14.848	0	0	103.769	0	7.26128	0	4.24752	0	0	0	0	0	0	0	0	0	0	1.66219	0	0	0	0	0	0	0
160.0/1.1 (8791)	160.042	1.11	8791	0	0	0	0	0	0	0	0	0	0	0	0	10.4909	0	0	0	1.70523	15.7907	0	0	0	0	0	0	0	22.3832	0	0	0	14.581	0	0	0	21.7465	11.1779	20.3089	167.333	79.8599	4.3586	92.5213	52.2375	20.6173	133.062	68.3087	5.15782	8.47163
160.0/3.2 (8792)	160.042	3.16	8792	0	0	0	0	41.0408	0	0	0	20.2999	12.0351	2.56305	35.0971	0	161.855	0	55.8282	82.6066	42.5271	36.1761	15.2691	76.3143	0	68.8507	27.6248	57.3444	0	61.1302	0	148.499	0	0	0	0	79.9975	0	0	0	0	0	0	0	41.222	0	0	0	0
160.0/3.3 (8799)	160.042	3.3	8799	0	0	0	53.151	0	0	0	185.365	0	0	0	135.344	99.2835	0	0	0	0	0	0	0	0	0	0	0	0	19.0565	0	0	0	0	0	0	0	0	0	0	242.364	0	0	141.157	158.032	203.836	454.352	0	817.624	0
160.0/3.4 (8796)	160.042	3.4	8796	0	0	0	0	0	5.66621	161.91	0	252.347	82.8414	0	0	0	0	27.8841	0	0	38.9718	0	69.7343	0	116.805	0	103.602	0	0	0	400.724	0	0	0	0	0	48.464	5.81482	0	0	0	2740.5	0	0	53.572	0	0	0	950.396
160.0/5.4 (8797)	160.042	5.39	8797	0	0	0	1.80199	0	0	49.5306	0	0	12.9444	41.2476	46.2475	5.70558	46.7036	69.268	3.7687	2.37674	0	19.8693	0	0	0	0	3.18437	15.5481	102.197	128.269	3.35829	5.64573	19.9706	0	0	0	0	0	0	11.2563	35.4491	101.535	0	0	31.2656	0	0	0	0
160.0/3.5 (8800)	160.042	3.53	8800	0	0	0	154.374	97.1869	127.358	1047.83	895.321	875.892	964.233	1178.44	1221.97	689.656	1190.16	1770.88	4405.47	3414.57	0	3454.38	1804.77	2334.52	2451.67	2352.95	2012.48	3296.81	1953.45	3670.8	3130.42	5259.16	4145.54	0	0	0	950.617	446.51	854.175	5374.93	5744.76	3024.96	3836.01	3982.51	3858.22	6041.83	4213.26	3317.76	3196.86
160.0/4.2 (8802)	160.042	4.18	8802	0	0	0	0	0	0	58.3854	71.618	87.8488	0	46.3212	61.8071	44.4995	54.0632	100.149	63.8128	43.3285	0	24.1368	24.0732	57.7006	33.5879	55.6136	33.3342	49.8866	19.9611	0	45.3619	52.8836	36.2684	0	0	0	4.69295	0	2.77449	72.9893	89.3506	154.449	33.154	34.2317	86.0312	66.5602	49.8608	81.2114	100.862
160.0/5.6 (8803)	160.042	5.56	8803	0	0	0	0	0	17.1395	29.5991	23.1831	33.3865	0	17.9309	38.6001	0	39.0963	81.3003	268.188	219.608	0	182.042	85.9458	176.612	207.489	204.096	153.147	172.108	0	41.235	229.689	282.776	108.466	0	0	0	0	0	0	11.7398	23.845	40.2369	0	0	0	0	2.48739	0	8.49486
160.0/6.9 (8801)	160.042	6.94	8801	0	0	0	0	0	0	661.797	669.393	1015.99	580.816	643.404	452.691	492.985	583.118	1146.41	470.859	0	0	348.148	0	10.8575	299.281	30.0504	0	310.056	40.4112	830.724	0	0	0	0	0	0	0	69.4536	0	0	309.493	372.816	376.536	0	0	46.9442	402.93	522.722	535.838
160.0/3.8 (8804)	160.042	3.79	8804	0	0	0	10.9788	17.7323	27.4899	1275.61	1074.53	1373.18	891.14	956.605	827.538	819.291	806.436	1636.89	531.697	342.519	0	0	467.41	697.014	594.185	579.84	523.678	898.98	589.276	0	467.759	633.021	229.938	0	0	0	35.9197	39.6202	38.0618	1896.13	1464.12	2460.08	1649.11	1371.57	1309.83	2175.83	1178.99	1930.18	2766.36
160.0/6.1 (8806)	160.043	6.12	8806	0	0	0	0	0	0	26.8755	29.5078	58.7021	21.0319	29.0477	38.4672	15.4633	3.33368	83.5448	0	0	0	0	0	12.3535	0	0	0	0	0	0	0	0	0	0	0	0	0	0	0	0	0	0	0	0	0.91137	0	0	0	0
160.0/6.7 (8807)	160.043	6.68	8807	0	0	0	22.6695	0	0	142.916	142.651	0	65.9051	0	0	0	130.925	0	0	0	227.127	0	58.009	0	0	0	0	0	0	0	0	0	0	0	0	0	81.1994	0	0	0	0	0	0	0	0	0	0	0	0
160.0/9.1 (8809)	160.044	9.14	8809	0	0	0	9408.07	11116.3	9802.71	3941.06	3464.54	4305.1	4081.61	4155.3	5017.4	3903.64	2722.23	5396.21	9257.22	6908.67	7660.89	2437.59	6959.26	8096.02	7438.49	8198.64	8059.01	8903.89	5759.56	8047.96	7768.49	7061.3	4992.35	0	0	0	11700.3	12099.6	10771	3523.91	3569.55	4210.12	0	0	0	0	0	0	456.621
160.0/3.0 (8813)	160.048	2.97	8813	0	0	0	0	0	0	0	0	0	0	0	0	0	0	0	0	0	0	0	0	0	0	0	0	0	0	0	0	0	0	0	0	0	0	0	0	0	0	0	0	0	0	1.37686	2.60182	0	1.68123
160.1/3.1 (8817)	160.073	3.07	8817	0	0	0	161.496	0	0	0	0	0	3.46689	0	0	0	0.858411	0	0	0	0	0	0	0	0	0	0	48.9694	0	0	0	0	0	0	0	0	0	0	0	0	0	0	0	0	0	0	0	0	0
160.1/2.4 (8821)	160.075	2.36	8821	0	0	0	0	0	0	0	0	0	0	0	0	1304.15	0	0	85.258	156.297	0	0	0	0	1012.61	228.497	421.037	1063.85	0	0	0	5.20462	0	0	0	0	0	0	0	0	0	0	0	0	0	0	0	0	0
160.1/2.1 (8824)	160.075	2.1	8824	0	0	0	0	0	4.5978	0	0	2084.19	503.148	0	1558.98	0	1359.19	0	0	0	147.405	0	199.068	0	0	0	0	0	1794.2	0	0	0	2.27498	0	0	0	0	0	0	0	0	0	0	0	0	0	0	0	0
160.1/3.2 (8823)	160.075	3.24	8823	215.236	89.9357	0	0	0	121.447	57.736	61.9155	36.3811	44.1481	74.6956	20.9678	57.7209	61.648	110.712	103.992	0	44.9298	99.1512	74.2119	0	95.8874	0	91.7578	0	107.734	64.625	12.508	119.544	124.003	0	0	0	0	0	0	0	0	0	0	0	0	0	0	0	0
160.1/2.2 (8825)	160.075	2.21	8825	0	0	1.35218	12.7001	8.95416	3.57764	1774.97	1681.4	0	0	987.556	0	0	0	3230.96	0	0	0	0	0	1293.98	0	0	0	0	0	3178.57	65.0838	0	0	0	0	0	0	0	0	0	0	0	0	0	0	0	0	0	0
160.1/2.5 (8826)	160.076	2.5	8826	0	6.60642	0	0	0	0	0	0	0	0	0	0	0	0	0	0	0	0	2360.81	0	0	0	235.509	22.9544	0	0	0	0	0	0	0	0	0	0	0	0	0	0	0	0	0	0	0	0	0	0
160.1/3.4 (8829)	160.093	3.37	8829	0	0	167.821	0	187.041	0	0	0	0	0	0	0	0	0	0	0	232.982	0	0	0	180.398	0	177.059	0	138.902	0	0	185.318	131.538	0	0	0	0	0	0	0	0	0	0	0	0	0	0	0	0	0
160.1/1.2 (8836)	160.095	1.21	8836	0	0	0	0	0	0	113.428	72.8515	60.8765	0	45.168	150.922	144.498	0	0	0	0	0	0	0	0	0	0	0	0	0	0	0	0	0	0	0	0	0	0	0	0	0	0	0	0	0	1.40355	0	0	0
160.1/1.0 (8842)	160.107	1.01	8842	0	0	0	0	0	0	0	4.0437	0	0	0	0	0	0	0	0	0	0	0	0	0	0	0	0	0	0	0	0	0	0	0	0	0	0	0	0	0	0	0	20.0612	23.0541	43.2269	95.9981	29.3545	15.4426	0
161.0/3.4 (8854)	161.043	3.4	8854	0	0	0	0	0	0	0	11.5577	0	0.369948	0	0	0	0	0	0	0	0	0	0	7.5137	0	0	0	0	0	0	0	0	5.85378	0	0	0	0	0	0	0	0	0	0	0	0	0	0	0	0
161.1/3.0 (8887)	161.091	3.02	8887	0	0	0	0	0	0	0	0	2.72438	0	0	0	0	0	2.78176	0	0	0	6.12694	0	0	0	0	0	0	0	11.8151	0	0	0	0	0	0	0	0	3.73339	61.8162	64.5432	82.9366	46.2253	37.5347	52.7806	98.6871	45.2601	57.2692	75.4309
161.1/14.2 (8897)	161.096	14.15	8897	85.1284	96.6308	96.8557	0	81.7825	66.5761	83.7368	0	129.496	95.283	144.638	105.671	0	82.2656	83.6349	85.6442	0	83.9479	47.8293	92.3015	92.9228	41.9973	0	0	95.7671	87.6173	29.1631	86.899	70.2317	92.9597	75.3151	133.073	132.996	94.8934	94.8001	83.43	92.5391	107.961	98.5101	0	102.053	0	0	0	99.2046	89.4444
162.0/1.9 (8915)	161.969	1.91	8915	0	0	21.0393	0	18.1875	0	0	0	0	0	0	0	0	0	0	21.5092	0	0	8.53169	0	16.5393	0	0	13.5537	15.2087	0	0	0	0	1.35171	0	0	0	0	0	0	0	0	0	0	0	0	0	0	0	0
162.0/3.6 (8922)	161.97	3.64	8922	0	0	0	0	0	0	0	0	0	0	0	0	0	13.9025	0	0	3.15997	0	0	13.4175	7.17578	8.57737	0	0	0	7.36803	0	0	0	0	0	0	0	0	0	0	0	0	0	10.7952	11.0093	0	0	0	0	0
162.0/1.3 (8928)	161.97	1.35	8928	0	0	0	0	0	0	30.9755	0	26.9479	0	5.00227	53.7484	44.2614	19.7229	0	0	0.0583916	0	0	0	0	0	0	0	0	0	0	0	0	0	0	0	0	0	0	0	0	0	0	0	0	0	0	0	0	0
162.0/3.4 (8939)	161.972	3.36	8939	19.6373	0	16.5437	0	0	0	0	3.90294	6.8185	0	14.9726	32.4695	17.2318	56.3611	0	29.0739	0	18.5667	10.8232	0	27.8617	0	24.4447	39.3837	34.7624	33.1841	0	11.0777	0	0	0	0	0	0	0	0	0	0	0	0	0	0	0	0	0	0
162.0/1.9 (8941)	161.972	1.91	8941	0	0	0	0	0	0	0	0	0	0	0	0	0	0	0	0	0	13.4305	0	0	0	0	0	0	0	0	0	21.3265	0	2.32282	0	0	0	0	0	0	0	0	0	0	0	0	0	0	0	0
162.0/2.7 (8944)	161.973	2.73	8944	0	5.24717	0	0	0	0	2.43278	3.77047	0	19.2385	0	0	0	0	0	0	0	0	0	0	0	0	0	0	0	0	0	0	0	0	0	0	0	0	0	0	0	0	0	0	0	0	0	0	0	0
162.0/1.2 (8945)	161.973	1.25	8945	0	0	0	0	0	0	0	25.6338	0	0	19.5737	0	202.91	0	13.9829	0	0	0	0	0	0	0	0	0	0	0	0	0	0	0	0	0	0	0	0	0	0	0	0	0	0	0.752006	0	0	0	0
162.0/1.2 (8955)	161.979	1.2	8955	0	0	39.7957	931.88	24.1543	33.9009	0	0	0	434.125	0	0	0	288.534	0	0	18.1631	11.7045	3.77834	22.505	13.1284	6.6398	26.7317	14.9688	14.8345	24.6172	5.90153	10.6887	97.564	155.265	0	0	0	1.52212	0	0	2.61179	1.60915	0	0	3.1155	1.7739	4.31301	0	0	2.65842
162.0/1.0 (8957)	161.981	1.05	8957	0	0	0	0	0	0	0	0	0	168.579	0	0	0	82.5983	0	0	0	0	0	0	0	0	0	0	0	0	0	0	0	0	0	0	0	0	0	0	0	0	0	0	0	0	0	0	0	0
162.0/3.6 (8964)	162.038	3.56	8964	0	0	0	0	0	2.67919	0	48.5439	41.9267	0	44.4352	57.5457	33.5324	57.0603	94.7955	222.672	148.436	0	124.688	87.4783	109.008	113.903	109.598	101.739	161.767	97.6695	177.1	147.727	272.553	198.443	0	0	0	41.1797	22.7747	38.1728	280.992	291.004	313.362	190.37	199.171	188.228	296.019	200.093	147.782	170.716
162.0/3.6 (8971)	162.04	3.58	8971	0	0	0	0	0	0	48.1125	0	0	39.7115	0	0	0	0	0	0	0	125.041	0	0	0	0	0	0	0	0	0	0	0	0	0	0	0	0	0	0	0	0	0	0	0	0	0	0	0	0
162.1/4.1 (8984)	162.073	4.13	8984	0	0	0	0	2.31261	0	0	0	0	0	0	0	0	0	0	0	0	0	0	12.1151	0	0	0	0	0	0	0	0	0	0	0	0	0	0	0	0	0	9.53862	0	14.809	9.57081	0	0	0	0	0
162.1/4.0 (8985)	162.074	3.96	8985	0	0	0	0	0	0	0	0	0	0	0	0	0	0	0	0	0	0	0	0	0	0	0	0	0	14.5368	27.1179	0	0	0	0	0	0	0.758583	0	0	0	0	0	0	0	0	0	0	0	0
162.1/3.8 (8989)	162.075	3.76	8989	0	0	0	0	0	3.02968	628.205	464.344	643.276	0	445.976	405.272	354.439	359.471	744.973	269.185	170.446	0	351.792	216.951	334.409	268.075	297.588	244.292	412.346	276.345	0	253.16	339.195	152.829	0	0	0	0	0	4.0299	886.355	721.59	1096.84	745.882	636.573	588.734	1043.48	528	885.82	1302.95
162.1/1.1 (8990)	162.075	1.11	8990	0	0	0	16.8889	0	0	28.2432	38.2481	31.3409	23.1393	33.6553	0	18.9204	0	33.3779	0	0	0	5.53485	5.783	13.6325	9.11393	3.06215	0	9.47169	25.0755	17.5677	0	0	5.67946	0	0	0	9.5922	7.97587	9.9327	128.086	60.1617	11.5209	77.6222	40.514	20.4028	91.1699	50.6363	6.65196	9.25566
162.1/1.2 (8993)	162.075	1.23	8993	0	0	0	161.348	3.53609	3.8398	0	3.86102	0	0	0	0	0	0	0	0	0	0	1.85837	0	0	0.862685	1.75969	2.42361	2.08122	0	0	0	6.22391	0	0	0	0	0	0	0	0	0	0	0	0	0	0	0	0	0
162.1/2.8 (8994)	162.075	2.81	8994	0	0	0	0	0	2.06952	2.5752	0	0	1.67683	0	0	2.60711	0	0	0	6.6999	0	0	0	0	0	0	5.3684	0	7.71524	0	0	0	0	0	0	0	0	0	0	0	0	0	0	0	0	0	0	0	0
162.1/3.0 (8998)	162.076	3.02	8998	0	0	0	0	0	0	0	0	0	0	0	0	4.34308	0	0	0	0	0	0	0	0	34.1164	0	0	0	4.04329	4.70036	0	19.7373	0	0	0	0	0	0	0	4.79023	51.5633	19.2458	0	0	0	25.1585	1.98417	13.378	37.269
162.1/4.0 (9001)	162.077	4.01	9001	0	0	0	0	0	0	0	0	0	0	0	0	22.329	0	0	0	0	0	28.787	0	0	22.7953	0	0	0	0	0	0	0	10.7734	0	0	0	0	0	0	0	7.29261	0	1.00413	0	0	0	0	0	0
162.1/1.1 (9003)	162.077	1.11	9003	0	0	0	0	0	0	0	0	0	0	0	15.9783	0	31.0169	0	0	0	0	0	0	0	0	0	0	0	0	0	0	0	0	0	0	0	0	0	0	0	0	0	0	0	0	0	2.56121	0	0
162.1/4.7 (9007)	162.09	4.65	9007	0	0	0	0	0	0	0	0	0	0	0	0	0	0	0	0	0	0	4.40458	0	0	0	0	0	0	1.60503	8.17413	0	0	0	0	0	0	0	0	0	3.04038	0	0	0	0	0	0	0	0	0
162.1/5.9 (9009)	162.091	5.94	9009	5.50708	3.09233	0	0	0	0	10.252	9.99875	12.6411	2.65593	10.8002	14.1545	9.41558	14.0283	23.2883	0	0	0	5.2824	0	0	10.2905	0	8.7457	7.33762	0	5.63055	0	0	0	0	0	0	0	0	0	0	0	0	0	0	0	0	0	0	0
162.6/3.5 (9029)	162.591	3.53	9029	0	0	0	0	10.6095	20.39	211.503	185.568	217.318	175.897	222.289	239.867	150.905	229.797	317.999	813.573	652.54	0	475.439	344.021	403.941	407.246	466.139	389.34	647.45	378.784	648.916	666.239	1002.67	794.794	0	0	0	178.159	77.5091	145.728	1129.36	1121.51	1122.75	744.174	823.69	798.468	1235.8	810.543	631.754	940.676
162.6/3.3 (9031)	162.592	3.3	9031	0	0	0	0	0	0	0	0	0	0	2.27535	0	0	0	0	0	16.2156	0	0	0	13.8925	0	0	0	0	1.10743	0	0	0	0	0	0	0	1.87734	0	0.180011	16.2926	63.669	0	16.3809	17.7154	13.7251	58.0309	0	166.373	0
163.0/1.5 (9039)	162.972	1.52	9039	0	0	0	0	0	0	1.21714	0	0	4.47352	1.02186	0	7.70402	0	0	0	0	0	0	0	0	0	0	0	0	0	0	0	0	0	0	0	0	0	0	0	0	0	0	0	0	0	0	0	0	0
163.1/4.8 (9053)	163.058	4.78	9053	0	0	0	0	0	17.0543	0	0	0	0	0	0	0	15.5546	0	0	0	0	38.5157	22.4556	0	0	0	0	0	30.9662	39.7808	0	0	4.19432	0	0	0	0	0	0	0	0	0	0	0	0	0	0	0	0
163.1/4.9 (9054)	163.059	4.93	9054	42.1456	25.7104	5.83449	0	18.5928	0	29.5415	35.748	25.3817	0	21.5587	22.8373	0	0	51.0104	35.9885	34.4366	0	0	0	32.8463	42.8305	37.9371	36.3013	26.3148	0	0	35.5897	40.6485	12.1507	0	0	0	0	0	0	0	0	0	0	0	0	0	0	0	0
163.1/7.2 (9062)	163.075	7.17	9062	42.2258	0	0	0	0	0	0	0	0	0	32.5318	0	0	0	0	0	0	0	0	0	0	0	0	0	0	0	0	0	0	0	25.9109	0	0	0	0	0	0	0	0	0	0	0	0	0	0	0
163.1/5.4 (9067)	163.075	5.37	9067	0	0	0	0	0	0	0	0	0	0	0	0	0	0	0	0	0	0	0	0	0	1.13756	0	0	0	0	0	0	0	0	0	0	0	0	0	0	9.56922	19.8234	18.7129	13.5068	0	5.59638	4.54952	4.82104	12.893	0
163.1/14.1 (9071)	163.077	14.12	9071	0	0	0	0	0	0	0	0	0	49.8446	0	0	0	0	0	0	0	59.4462	0	0	0	0	0	0	0	0	0	0	3.75001	0	0	0	0	0	0	0	0	0	0	0	0	0	0	0	0	0
163.1/3.3 (9074)	163.078	3.34	9074	0	0	0	0	0	0	0	0	0	0	0	2.57083	2.17058	0	0	0	0	0	0	0	0	0	0	0	0	1.01318	0	0	0	0	0	0	0	0	0	0	6.41133	5.05652	0	0	0	10.3177	0	0	0	0
163.1/3.0 (9085)	163.107	3.05	9085	0	0	0	0	0	0	0	0	0	0	0	0	8.03579	0	0	0	0	0	8.72078	0	0	0	0	0	0	4.40132	0	0	0	54.9481	0	0	0	0	0	1.42254	31.025	57.8858	68.6266	4.15462	0	17.7244	51.787	31.5195	43.285	83.1684
163.1/2.8 (9088)	163.107	2.81	9088	0	0	0	0	0	1.44987	11.1973	0	0	0	0	0	0	0	0	0	0	0	0	2.47726	0	0	0	56.6539	0	9.53997	0	0	0	3.52815	0	0	0	0	0	0	0	26.8539	0	0	0	0	0	0	0	0
163.1/3.8 (9087)	163.107	3.78	9087	0	0	0	0	0	0	722.902	566.756	813.077	0	535.433	523.763	477.788	0	952.407	385.339	269.978	0	519.341	292.24	464.081	393.162	421.452	319.654	537.502	387.188	37.7886	385.167	543.653	212.43	0	0	0	0	0	0	1201.28	930.41	1594.65	1029.26	843.914	838.494	1331.66	723.825	1188.14	1787.33
163.1/4.3 (9089)	163.107	4.31	9089	0	0	0	0	0	0	0	0	0	0	0	0	0	0	0	0	0	0	0	0	0	0	0	0	0	0	0	0	0	0	0	0	0	0	0	0	0	0	0	0	1.91799	0	13.6031	0	0	0
163.1/3.6 (9091)	163.107	3.56	9091	0	0	0	79.6945	52.7746	87.0868	725.31	688.772	551.551	0	688.606	831.85	509.556	729.357	1041.79	2717.53	1932.99	0	1564.3	1163.93	1431.79	1515.55	1517.84	1293.71	2092.46	1128.55	2225.86	2174.05	3255.62	2632.58	0	0	0	602.998	281.785	525.194	3477.53	3834.29	3764.52	2584.66	2697.69	2516.93	3972.79	2627.41	2185.25	2737.66
163.1/3.3 (9092)	163.107	3.3	9092	0	0	0	0	0	0	38.0044	0	92.3523	0	28.5942	0	0	61.5706	0	4.15783	115.921	7.79672	0	12.7588	35.3331	0	5.66203	28.3654	4.05847	27.55	0	0	38.8393	0	0	0	0	33.6996	0	0	132.362	5.36798	0	65.3977	75.4053	111.394	276.772	140.536	516.785	0
163.1/4.2 (9094)	163.107	4.18	9094	0	0	0	0	0	0	41.4476	58.4398	61.9267	39.2022	43.3443	46.5463	31.1503	32.3737	67.4252	23.0816	21.959	16.755	0	19.2022	36.9002	26.9188	36.4619	25.4326	36.3264	17.6297	0	15.1231	24.1464	0	0	0	0	2.76794	0	0	13.1916	35.1144	80.1399	0	21.7907	41.5917	38.7359	16.7209	46.6799	59.9505
163.1/3.8 (9096)	163.108	3.8	9096	0	0	0	0	0	0	0	0	0	495.519	0	0	0	497.634	0	0	0	229.502	0	0	0	0	0	0	0	0	0	0	0	0	0	0	0	0	0	0	0	0	0	0	0	0	0	0	0	0
164.1/6.4 (9119)	164.07	6.4	9119	0	0	0	0	0	0	45.2665	46.5335	55.883	56.264	48.2959	44.1965	48.6049	53.4318	74.7593	0	0	0	0	0	0	0	0	0	11.7625	0	0	0	0	0	0	0	0	0	0	0	47.5182	51.8859	57.6106	42.2486	34.907	51.8376	58.1496	0	28.9034	0
164.1/6.9 (9126)	164.106	6.91	9126	2.56393	1.57791	0	0	0	0	443.278	483.839	499.871	692.771	538.906	480.423	538.617	480.728	709.465	23.7799	79.18	85.5267	0	0	0	0	0	0	0	0	0	0	0	0	0	0	0	0	0	0	0	0	0	0	0	0	0	0	0	0
164.6/1.4 (9139)	164.55	1.41	9139	6.68614	0	0	26.512	0	10.3138	0	2.63832	0	0	0	1.74014	0	0	0	20.8663	15.5162	2.29209	18.4508	1.29825	4.66675	12.6285	6.49998	6.1367	16.1415	3.62567	8.37895	0	4.1182	12.0372	0	0	0	0	0	0	0	0	0	0	0	0	0	0	0	0
165.0/1.4 (9152)	164.978	1.36	9152	0	0	0	6.5937	1.62905	5.84504	0	0	0	0	0	0	6.1018	0	0	0	0	0	0	0	0	0	0	0	0	0	0	0	3.96475	0	0	0	0	0	0	0	0	0	0	0	0	0	0	0	0	0
165.0/1.3 (9154)	164.984	1.27	9154	0	0	1.03721	0	0	0	0	0	0	66.8294	0	0	0	46.1742	0	0	0	0	0	0	0	0	0	0	0	0	0	0	0	0	0	0	0	0	0	0	0	0	0	0	0	0	0	0	0	0
165.0/1.0 (9156)	165.022	1.02	9156	0	0	0	0	0	0	5.14401	1.41182	5.96283	0	0	10.7705	6.03084	0	0	0	0	0	0	0	0	0	0	0	0	0	0	0	0	0	0	0	0	0	0	0	0	0	0	0	0	0	0	0	0	0
165.0/9.1 (9157)	165.042	9.12	9157	0	0	0	266.537	92.1074	0	0	57.2148	55.3753	0	46.0773	71.4386	53.0332	21.1146	46.3727	60.6669	83.0958	0	7.73067	77.1765	80.7396	50.6788	83.3483	62.113	81.8347	63.7206	58.1896	93.573	67.6817	66.4661	0	0	0	0	90.0091	112.626	85.8075	93.2044	92.4915	0	0	0	0	0	0	20.1268
165.1/3.6 (9161)	165.053	3.57	9161	0	0	0	0	0	0	0	0	1.48215	0	0	0	0	0	0	0	0	0	0	0	32.1958	0	0	6.28047	39.3248	0	37.8594	1.88986	0	0	0	0	0	0	0	0	0	0	0	0	0	0	0	0	0	0
165.1/4.1 (9166)	165.053	4.07	9166	0	0	0	0	0	0	0	0	0	0	0	0	0	0	0	0	0	0	0	0	49.6289	0	19.379	29.9422	70.0685	0	0	0	0	0	0	0	0	0	0	0	0	0	0	0	0	0	0	0	0	0
165.1/5.1 (9167)	165.053	5.15	9167	6.86321	0	0	0	0	0	0	0	0	0	0	0	0	0	0	1.63976	2.09534	0	0	0	0	0	0	0	0	0	0	0	3.03467	0	0	0	0	0	0	0	0	0	0	0	0	0	0	0	0	0
165.1/1.1 (9168)	165.054	1.15	9168	5012.49	3964.2	3629.88	6116.34	4454.96	4081.48	3510.29	3387.25	3297.66	3500.29	3517.35	3506.79	3178.8	3469.46	3785.51	4760.87	3233.08	0	4559.65	4488.32	3622.58	4793.39	3340.11	3531.85	5042.12	3147.22	4378.18	5131.39	5121.51	4380.47	0	0	0	0	0	0	0	1.13356	1.0852	0	0	1.2714	0	0	0	0
165.1/1.4 (9174)	165.055	1.41	9174	364.883	877.465	1518.15	2827.62	421.755	1132.28	819.694	761.275	960.158	592.524	1074.24	465.241	1749.16	1011.79	1207.55	3033.88	2383.2	0	3322.12	578.354	1314.72	1743.02	2217.13	2448.45	2689.06	855.574	2029.18	2322.94	1074.09	2473.85	0	0	0	0	0	0	0	0	0	0	0	0	0	0	0	0
165.1/14.4 (9179)	165.091	14.35	9179	0	0	0	0	5.01012	0	2.36096	0	0	4.79259	0	0	0	4.40855	2.0604	0	0	0	1.24888	0	3.42827	0	0	0	0	0	0	3.56068	0	2.2843	2.09251	0	3.75839	5.12337	3.23977	0	0	3.75696	0	0	0	0	3.29241	0	1.48241	0
165.6/1.7 (9196)	165.578	1.75	9196	123.647	3.36085	2.69217	0	0	0	0	0	0	0	0	0	0	0	48.1819	0	0	1.06514	0	0	0	0	0	0	0	0	0	0	0	0	0	0	0	0	0	0	0	0	0	0	0	0	0	0	0	0
165.6/2.4 (9201)	165.579	2.36	9201	0	21.0905	0	273.997	0	8.02732	0.938163	0	5.39205	0	7.71702	7.62165	0	0	0	0	0	10.3425	0	1.43829	0	0	0	0	0	0	0	0	0	0	0	0	0	0	0	0	0	0	0	0	0	0	0	0	0	0
165.6/2.8 (9200)	165.579	2.8	9200	0	0	0	0	0	0	0	0	0	0	0	0	0	0	0	0	0	0	186.283	0	0	0	141.87	132.985	130.54	0	0	151.279	140.886	0	0	0	0	0	0	0	0	0	0	0	0	0	0	0	0	0
166.1/1.0 (9210)	166.052	1.01	9210	25.0965	0	48.2274	0	46.1895	36.6906	0	0	0	0	0	0	104.871	0	128.354	100.166	0	0	116.936	0	111.04	111.595	93.2119	95.416	142.276	113	131.97	72.6887	44.065	0	0	0	0	0	0	0	0	0	0	0	0	0	0	0	0	0
166.1/8.0 (9227)	166.084	8.03	9227	70.9365	0	55.2293	65.9447	50.3612	51.2128	0	0	0	0	0	0	0	0	0	33.121	30.484	0	3.63746	3.0484	7.3484	6.41845	7.05272	12.1564	7.46316	0	0	31.6197	40.8405	17.0742	0	0	0	0	0.499415	0	0	0	0	0	0	0	0	0	0	0
166.1/7.8 (9231)	166.085	7.8	9231	8.84611	0	0	0	0	0	0	0	0	0	0	0.976087	0	0	2.07188	18.627	0	0	13.5632	3.08199	10.657	14.3324	15.4169	15.0039	0	0	4.28733	8.84558	18.3421	0	0	0	0	0	0	0	0	0	0	18.5205	28.2286	10.2472	122.644	5.49992	0	0
166.1/4.1 (9235)	166.085	4.1	9235	45.7077	79.0677	47.7757	0	0	0	71.1641	64.8791	74.0847	0	80.0794	64.973	0	0	83.594	53.129	65.4079	0	0	66.4825	79.9273	72.2176	139.16	90.5105	95.9282	0	0	61.6358	36.6993	17.2425	0	0	0	0	0	0	0	0	0	0	0	0	0	0	0	0
166.1/1.2 (9238)	166.086	1.16	9238	0	5830.92	6376	10622.1	6320.05	10467.8	4683.48	4136.92	4825.59	3549.7	4382.67	4097.75	4020.9	7250.79	0	10551.8	7670.83	0	46.6002	4514.38	5922.63	106.408	7355.3	6109.51	6376.86	4188.87	0	11522.4	0	10109.4	0	0	0	0	1.0858	0	0	0	0	0	0	0	0	0	0	0
166.1/3.9 (9239)	166.086	3.89	9239	0	0	14.6264	0	24.4696	20.4878	0	0	0	0	0	0	78.4567	81.4023	34.487	0	0	2.24798	74.5518	0	0	0	0	0	0	83.4697	90.0383	0	0	0	0	0	0	0	0	0	0	0	0	0	0	0	0	0	0	0
166.1/6.0 (9237)	166.086	5.98	9237	11.6217	4.65539	2.43168	0	0	0	29.8723	25.6572	47.8877	11.2028	23.2725	40.7732	28.7596	40.2112	69.3204	26.8716	5.86997	0	28.3512	3.00476	19.5175	28.7197	32.9141	21.6676	25.6472	0	33.5887	2.34342	6.34124	3.97002	0	0	0	0	0	0	0	0	0	0	0	0	0	0	0	0
166.1/2.7 (9244)	166.086	2.67	9244	766.251	0	12150.1	0	12298.4	0	0	0	0	0	0	0	9826.98	10536.1	6982.96	15094.6	16570.7	0	0	10773.1	12354.1	0	16378	0	14.7084	13104	17145.8	0	0	16221.1	0	0	0	0	0	0	0	0	0	0	0	0	0	0	0	0
166.1/5.3 (9241)	166.086	5.28	9241	0	0	0	0	0	0	0	11.7443	0	0	0	0	0	0	0	0	0	0	17.7093	0	0	0	0	0	0	4.72878	63.6967	0	0	0	0	0	0	0	0	0	0	0	0	0	0	0	0	0	0	0
166.1/6.7 (9240)	166.086	6.72	9240	108.764	90.7421	86.5907	0	0	63.916	0	0	0	0	0	0	0	0	0	62.533	0	43.216	34.1211	0	19.7764	30.3651	14.5498	27.9721	0	0	0	0	70.929	0	0	0	0	0	0	0	0	0	0	0	0	0	0	0	0	0
166.1/1.8 (9247)	166.086	1.76	9247	16302.5	0	9.91914	0	0	0	0	0	0	165.129	0	0	0	0	7404.1	0	0	24.4445	0	20.9337	0	0	0	0	0	0	572.641	0	0	0	0	0	0	0	0	0	0	0	0	0	0	0	0	0	0	0
166.1/1.4 (9248)	166.086	1.4	9248	0	0	0	0	0	0	0	0	0	0	0	0	0	0	0	0	0	0	8634.1	0	0	11837.4	0	0	0	81.1685	7841.98	0	0	0	0	0	0	0	0	0	0	0	0	0	0	0	0	0	0	0
166.1/2.1 (9250)	166.086	2.07	9250	0	0	0	0	46.9554	0	205.446	0	469.284	0	0	0	0	0	0	0	290.854	0	0	0	91.8179	0	33.9196	42.0178	0	69.3974	0	0	0	0	0	0	0	0	0	0	0	0	0	0	0	0	0	0	0	0
166.1/1.9 (9255)	166.086	1.93	9255	0	889.482	916.427	0	206.852	99.729	0	109.639	0	0	0	468.574	98.1007	192.298	0	267.618	0	0	0	146.649	181.738	0	49.7201	95.3086	17.5576	258.304	0	606.691	0	152.246	0	0	0	0	0	0	0	0	0	0	0	0	0	0	0	0
166.1/2.5 (9257)	166.087	2.52	9257	0	9020.89	0	0	0	9787.03	8279.53	8497.76	9040.53	8318.18	9215.18	5389.44	0	0	0	0	82.6489	9909.03	0	0	0	0	47.868	0	0	369.494	0	0	0	0	0	0	0	0	0	0	2.05223	2.42214	1.3536	0	0	4.50753	0	1.11594	0.848817	0
166.1/2.8 (9258)	166.087	2.8	9258	0	0	0	0	0	0	0	0	0	0	0	0	0	0	0	0	0	0	20837.4	0	0	0	0	16905.9	16091.5	0	0	14056	11313.4	0	0	0	0	0	0	0	0	0	0	0	0	0	0	0	0	0
166.1/8.0 (9259)	166.087	8.03	9259	0	55.0276	0	0	0	0	0	0	0	0	0	0	0	1.39218	0	0	0	25.3219	0	0	0	0	0	0	0	13.138	0	0	0	0	0	0	0	0	0	0	0	0	0	0	0	0	0	0	0	0
166.1/7.7 (9261)	166.087	7.71	9261	0	4.5707	9.60402	0	0	0	2.34206	0	0	0	0	0	0	0	0	0	0	15.5291	0	0	0	0	0	0	2.39232	7.88717	0	0	0	0	0	0	0	0	0	0	0	0	0	0	0	0	0	0	0	0
166.1/4.0 (9262)	166.088	4.02	9262	0	0	0	0	5.24708	0	0	0	0	69.0782	0	0	0	0	0	0	0	48.0637	0	0	0	0	0	0	0	0	0	0	0	0	0	0	0	0	0	0	0	0	0	0	0	0	0	0	0	0
166.1/12.8 (9265)	166.089	12.79	9265	0	0	0	0	0	0	3.75863	0	0	0	0	0	0	0	0	5.67703	0	4.34801	0	0	0	0	0	0	0	0	0	0	0	0	0	0	0	0	0	0	0	0	0	0	0	0	0	0	0	0
167.0/1.2 (9271)	166.958	1.24	9271	0	0	0	336.437	0	0	0	0	0	0	0	0	8.16593	0	0	0	0	0	0	0.688607	0	0	0	0	0	0	0	0	0	2.82755	0	0	0	0	0	0	0	0	0	0	0	0	0	0	0	0
167.0/1.2 (9274)	166.96	1.25	9274	0	0	0	0	0	0	0	0	0	74.5283	0	0	19.2948	51.6304	0	0	0	0	0	0	0	0	0	1.47961	0	0	0	0	12.9732	11.2959	0	0	0	0	0	0	0	0	0	0	0	0	0	0	0	0
167.1/1.1 (9290)	167.076	1.08	9290	0	0	0	0	0	0	0	0	0	0	11.8227	0	0	0	0	0	0	0	0	0	0	0	0	0	0	0	0	0	0	0	0	0	0	0	0	0	0	0	0	0	0	0	0	0	0	0
167.1/2.3 (9305)	167.089	2.25	9305	0	0	0	0	0	121.871	0	8.74715	0	0	10.9764	47.4297	0	0	12.6295	0	0	0	0	0	0	0	0	0	0	0	0	0	0	0	0	0	0	0	0	0	0	0	0	0	0	0	0	0	0	0
167.1/1.0 (9314)	167.093	1.01	9314	5.22144	0	0	0.546536	0	0	0	4.89699	0	0	0	0	0	0	0	0	0	0	0	0	0	0	0	0	0	0	0	0	0	0	0	0	0	0	0	0	0	0	0	0	0	0	0	0	0	0
168.0/1.4 (9342)	167.996	1.44	9342	13.794	0	19.4283	58.5232	4.91426	17.795	0	0	1.19394	2.45463	3.12164	0	2.79708	0	0	0	13.4289	0	148.609	41.891	20.1293	252.445	9.4924	32.019	3.65955	53.2523	13.5425	6.67309	33.0901	25.7445	0	0	0	0	0	0	0	0	0	0	0	0	0	0	0	0
168.0/3.4 (9346)	168.028	3.38	9346	0	0	0	0	0	0	0	128.503	49.8626	0	97.3925	76.2281	32.1355	14.2264	30.4974	0	0	0	0	0	0	0	0	0	0	0	0	0	0	0	0	0	0	0	0	0	0	0	0	0	0	0	0	0	0	0
168.0/2.2 (9347)	168.029	2.17	9347	0	0	0	0	0	0	0	0	3421.22	0	0	2371.66	0	0	2515.86	0	0	0	0	0	0	0	0	0	0	0	0	0	0	0	0	0	0	0	0	0	0	0	0	0	0	0	0	0	0	0
168.0/1.2 (9348)	168.03	1.18	9348	0	0	0	0	0	0	8412.37	6592.25	7329.14	1944.83	5873.63	5649	4214.08	5336.22	0	0	0	0	0	0	0	0	0	0	0	0	0	0	0	0	0	0	0	0	0	0	0	0	0	0	0	0	0	0	0	0
168.0/2.3 (9349)	168.03	2.28	9349	0	0	0	0	0	0	4054.1	3635.99	0	0	3826.34	0	1680.38	0	0	0	0	0	0	0	0	0	0	0	0	0	0	0	0	0	0	0	0	0	0	0	0	0	0	0	0	0	0	0	0	0
168.1/3.5 (9351)	168.061	3.48	9351	0	0	0	0	0	0	0	0	0	0	0	0	0	0	18.7116	0	0	0	0	16.5558	20.4023	0	7.80744	21.0321	7.82754	0	3.8836	0	0	0	0	0	0	0	0	0	0	0	0	0	0	0	0	0	0	0
168.1/3.4 (9352)	168.062	3.38	9352	0	0	0	0	0	0	0	0	0	0	0	4.36769	16.7707	0	0	0	0	0	0	0	0	0	0	0	0	10.6826	0	0	0	0	0	0	0	0	0	0	0	0	0	0	0	0	0	0	0	0
168.1/2.9 (9354)	168.062	2.92	9354	0	0	0	0	0	0	3.00353	4.86526	0	0	3.26615	0	0	0	0	0	0	0	0	4.96115	0	0	0	0	0	22.5938	0	0	0	0	0	0	0	0	0	0	0	0	0	0	0	0	0	0	0	0
168.1/3.4 (9357)	168.064	3.38	9357	0	0	0	0	0	0	12.1046	8.27135	14.1087	0	4.49304	0	0	0	0	0	0	0	0	0	0	0	0	0	0	0	0	0	0	0	0	0	0	0	0	0	0	0	0	0	0	0	0	0	0	0
168.1/1.1 (9358)	168.065	1.06	9358	0	0	0	0	0	0	6.8448	7.58931	11.5934	0	11.2052	10.9393	5.61127	0	0	0	0	0	0	0	0	0	0	0	0	0	6.17133	0	0	0	0	0	0	0	0	0	37.986	33.6033	36.6278	0	0	3.4662	0	0	2.21521	0
168.1/1.3 (9363)	168.066	1.26	9363	0	0	0	0	0	0	0	0	0	0	0	0	0	0	0	0	0	5.6272	0	0	0	0	0	0	0	3.16549	0	0	0	6.31258	0	0	0	0	0	0	0	0	0	0	0	0	0	0	0	0
168.1/2.4 (9371)	168.091	2.36	9371	0	0	0	378.471	0	6.29744	1.97836	34.5998	0	0	0	0	0	0	0	0	0	0	0	0	0	0	0	0	0	0	0	0	0	0	0	0	0	0	0	0	0	0	0	0	0	0	0	0	0	0
168.1/1.5 (9372)	168.091	1.55	9372	0	0	0	0	0	0	0	0	0	0	0	0	0	0	0	0	0	0	71.6062	0	0	123.125	0	0	0	0	66.3332	0	121.738	0	0	0	0	0	0	0	0	0	0	0	0	0	0	0	0	0
168.1/2.8 (9373)	168.091	2.8	9373	0	0	0	0	0	0	0	0	0	0	0	0	0	0	0	0	0	0	300.724	0	0	3.23562	200.026	210.418	214.313	0	0	0	159.227	0	0	0	0	0	0	0	0	0	0	0	0	0	0	0	0	0
169.0/1.5 (9376)	168.997	1.52	9376	0	0	1.03921	0	0	1.18991	0	0	0.86164	0	0	0	28.7922	0	0	0	0	0	0	0	0	0	0	0	0	0	0	0	0	0	0	0	0	0	0	0	0	0	0	0	0	0	0	0	0	0
169.0/1.5 (9377)	168.999	1.48	9377	0	0	0	3.16509	0	0	0	0	0	53.6978	0	0	0	75.4791	0	0	0	0	0	0	0	3.17131	0	0	0	0	0	0	0.784574	0	0	0	0	0	0	0	0	0	0	0	0	0	0	0	0	0
169.0/1.1 (9383)	169.035	1.06	9383	0	0	0	0	0	0	5.06726	9.65248	6.25518	0	7.43535	11.9671	11.9313	0	0	0	0	0	0	0	0	0	0	0	0	0	0	0	0	0	0	0	0	0	0	0	44.0249	52.7691	33.9877	0	0	0	0	0	0	0
169.1/4.5 (9390)	169.076	4.45	9390	0	0	0	0	0	0	0	0	0	2.91079	0	0	2.5178	0.611275	0	0	0	0	104.79	77.5314	0	0	0	0	0	76.5488	130.954	0	0	0	0	0	0	0	0	0	0	0	0	0	0	0	0	0	0	0
169.1/4.6 (9391)	169.076	4.61	9391	87.4828	34.9052	36.8499	28.3123	39.3544	0	97.828	98.4406	97.199	91.0192	95.4871	94.6048	92.8976	107.383	112.811	66.5576	43.882	0	0	0	61.9099	114.595	64.5367	74.3822	76.3958	0	0	59.3969	93.0097	48.6378	0	0	0	0	0	0	4.83825	3.25081	4.68322	0	7.12399	0	0	3.63407	4.47146	0
169.1/3.6 (9399)	169.095	3.57	9399	4.54069	0	0	0	0	0	0	0	0	0	0	0	2.27269	0	0	0	1.19766	0	0	0	0	0	0	1.62466	0	0	4.43982	0	0	0	0	0	0	0	0	0	0	0	0	0	0	0	0	0	0	0
169.1/2.6 (9402)	169.096	2.57	9402	0	138.112	24.2115	0	5.92942	0	106.706	116.269	144.273	0	160.551	80.7379	5.89209	0	0	0	0	0	0	0	0	0	2.53075	0	0	6.11826	0	0	0	0	0	0	0	0	0	0	3.10943	0	0	0	0	0	1.97206	0	0	0
169.1/2.4 (9404)	169.096	2.45	9404	0	3.89696	0	199.404	0	0	37.9808	30.3459	56.753	0	0	5.84603	1.55206	0	0	0	0	0	0	0	0	0	0	0	0	0	0	0	0	0	0	0	0	0	0	0	0	0	0	0	0	0	0	0	0	0
169.1/2.8 (9405)	169.096	2.75	9405	517.249	0	159.34	0	211.216	183.267	0	0	0	189.717	0	0	192.48	212.909	307.68	482.016	181.036	0	0	98.2445	124.551	0	0	88.9418	0	87.6734	228.782	0	0	227.266	0	0	0	0	0	0	0	0	0	0	0	0	0	0	0	0
169.1/1.9 (9406)	169.097	1.94	9406	0	0	0	0	0	0	0	1.63207	0	0	0	4.22321	2.9523	0	135.997	0	0	5.05168	0	0	0	0	3.35397	1.45487	0	0	32.852	2.78598	147.43	0	0	0	0	0	0	0	0	0	0	0	0	0	0	0	0	0
169.1/1.2 (9408)	169.097	1.18	9408	0	72.0638	0	0	0	60.2574	0	0	0	0	0	0	0	0	0	0	0	50.973	0	0	0	0	0	0	0	0	0	0	0	0	0	0	0	0	0	0	0	0	0	0	0	1.47439	0	0	0	0
169.1/1.9 (9411)	169.099	1.85	9411	0	12.4027	0	0	0	4.79134	0	0	0	0	3.66734	3.52815	0	0	0	0	0	0	0	0	0	0	0	0	0	0	0	0	0	0	0	0	0	0	0	0	0	0	0	0	0	0	0	0	0	0
170.0/1.4 (9420)	170.031	1.38	9420	0	0	0	0	0	0	0	0	0	54.7016	0	0	3.39478	51.8803	0	0	0	0.403142	0	0	0	0	0	0	0	0	4.52593	0	0	0	0	0	0	0	0	0	0	0	0	0	0	0	0	0	0	0
170.0/2.1 (9421)	170.032	2.11	9421	0	0	0	0	0	0	0	0	0	0	5.205	19.7194	0	0	5.65204	0	0	0	0	0	0	0	0	0	0	0	0	0	0	0	0	0	0	0	0	0	0	0	0	0	0	0	0	0	0	0
170.0/2.3 (9422)	170.033	2.26	9422	0	0	0	0	0	0	44.1841	34.3917	34.775	0	36.8325	0	0	6.02952	21.8069	0	0	0	0	0	0	0	0	0	0	0	0	0	0	0	0	0	0	0	0	0	0	0	0	0	0	0	0	0	0	0
170.1/2.7 (9429)	170.056	2.72	9429	0	0	0	0	0	0	6.55561	0	0	0	0	0	36.0618	0	0	0	0	0	0	0	0	0	0	0	0	68.5378	0	0	0	0	0	0	0	0	0	0	0	0	0	0	0	0	0	0	0	0
170.1/2.3 (9430)	170.059	2.28	9430	0	0	0	131.725	30.5868	0	0	0	0	0	0	0	0	0	0	0	0	0	0	2.77701	0	0	0	0	0	0	0	0	0	0	0	0	0	0	0	0	0	0	0	0	0	0	0	0	0	0
170.1/3.3 (9434)	170.059	3.25	9434	1391.44	588.126	583.601	0	648.581	693.187	355.519	391.821	404.266	362.984	434.056	344.717	418.981	454.635	830.642	760.822	720.46	0	624.125	534.167	503.077	569.738	635.754	663.366	557.327	627.619	451.753	788.521	1305.43	702.826	0	0	0	0	0	0	0	0	0	0	0	0	0	0	0	0
170.1/2.9 (9435)	170.059	2.88	9435	0.962587	0	205.607	0	0	0	0	0	0	0	0	0	0	0	0	0	355.496	0	0	0	276.608	0	0	275.532	0	0	0	0	0	0	0	0	0	0	0	0	0	0	0	0	0	0	0	0	0	0
170.1/2.8 (9437)	170.06	2.76	9437	0	0	0	0	0	0	0	0	163.095	0	114.397	78.6427	41.1105	259.353	0	0	0	0	0	49.5682	0	0	0	3.36496	0	7.46746	0	0	0	0	0	0	0	0	0	0	0	0	0	0	0	0	0	0	0	0
170.1/2.3 (9438)	170.062	2.26	9438	0	19.0161	4.26423	0	0	0	0	0	0	0	0.0526527	0	2.94218	0	0	0	0	157.007	0	0	0	0	0	1.61595	0	0	0	0	0	0	0	0	0	0	0	0	0	0	0	0	0	0	0	0	0	0
170.1/1.1 (9442)	170.078	1.11	9442	0	0	18.0647	0	0	0	0	0	0	0	0	0	85.4222	0	0	0	24.9041	0	0	0	3.50233	0	0	0	0	0	0	0	0	0	0	0	0	0	0	0	0	0	0	0	0	0	0	0	0	0
170.1/1.9 (9446)	170.08	1.87	9446	0	1.263	0	0	0	0	0	1.34345	5.67658	0	0	0	1.41291	0	0	2.38423	0	0	0	0	0	0	0	12.3713	0	0	0	10.5357	2.36306	1.2096	0	0	0	0	0	0	0	0	0	0	0	0	0	0	0	0
170.1/1.1 (9447)	170.08	1.1	9447	40.1953	0	0	8.94233	16.7387	15.8023	70.147	79.358	88.4106	52.356	82.8572	126.636	0	76.9351	80.3651	29.3937	0	0	6.6106	0	0	0	10.8333	0	0	0	0	18.1864	69.1797	52.5829	0	0	0	0	0	0	583.915	679.22	782.143	0.758535	0	0	0	0	0	0
170.1/6.0 (9457)	170.116	6.02	9457	0	0	0	0	0	0	0	17.1436	18.1385	9.61581	10.1725	16.4387	12.7956	9.2117	20.5659	0	0	0	0	0	0	0	0	0	0	0	0	0	0	0	0	0	0	0	0	0	0	0	0	0	0	0	0	0	0	0
171.1/3.5 (9462)	171.059	3.53	9462	0	0	0	0	0	0	0	0	0	0	0	0	0	0	0	0	0	0	0	0	0	0	0	0	0	0	0	0	0	0	0	0	0	0	0	0	0	0	4.87941	0	0	0	0	0	0	0
171.1/12.4 (9488)	171.098	12.45	9488	0	0	0	0	0	0	0	0	0	0	2.1864	0	0	0	0	0	1.80488	1.36021	0	0	0	0	0	0	0	0	0	0	0	0	0	0	3.03657	0	5.0077	0	0	0	0	2.72213	0	2.40504	0	2.38417	0	0
171.1/14.5 (9494)	171.099	14.52	9494	4.40971	1.7202	0	0	0	0	0	6.56763	0	0	7.53704	0	0	1.17924	0	3.08477	0	0	0	3.77115	3.87797	0	0	2.52156	3.61028	0	1.69031	5.0219	0	0	0	6.82453	0	2.88821	5.20783	1.7292	0	2.34894	0	0	10.3587	0	0	0	0	3.29729
171.1/3.1 (9519)	171.112	3.13	9519	0	0	0	0	0	0	0	0	0	98.321	115.541	102.55	195.527	0	0	0	0	0	0	0	0	0	0	0	0	0	0	0	0	33.8848	0	0	0	0	0	0	0	0	0	0	0	0	0	0	0	0
171.1/3.0 (9524)	171.112	3.03	9524	0	0	0	0	12.8543	0	0	80.0212	122.438	0	0	0	0	0	287.578	0	9.85573	0	0	8.35894	0	6.50865	5.21414	0	2.95191	5.4817	0	16.4814	41.3969	7.20386	0	0	0	0	0	0	0	0	0	0	0	0	0	0	0	0
171.1/3.8 (9523)	171.112	3.76	9523	0	0	0	0	0	23.6885	41.5981	0	0	0	34.0986	38.67	41.0314	34.1978	0	0	0	0	69.5165	0	6.67395	0	0	7.12025	0	17.6785	101.055	0	0	0	0	0	0	0	0	0	1.77558	0	0	0	0	0	0	0	1.74898	0
171.1/3.5 (9526)	171.112	3.49	9526	344.859	136.917	142.768	0	129.877	152.574	170.794	175.447	173.565	155.751	167.889	154.335	168.476	147.119	363.152	242.935	165.535	0	112.424	74.3261	71.3276	122.593	109.513	105.187	117.866	83.9427	153.614	186.974	281.408	142.24	0	0	0	0	0	0	0	0	0	0	0	0	2.59874	0	0	0
171.1/13.7 (9543)	171.147	13.69	9543	5.90585	0	0	0	0	0	0	0	0	0	0	0	0	0	0	0	1.39791	0	1.67604	0	0	0	0	0	2.62979	0	0.838489	0	0	0	0	0	0	0	0	0	0	0	1.77964	0	0	0	0	0	0	0
172.0/4.2 (9552)	172.005	4.17	9552	0	15.3397	6.43083	0	8.48444	0	37.0115	0	37.6841	0	34.7892	0	0	0	0	0	24.0125	0	0	0	32.5367	0	42.5384	39.6451	36.2933	0	0	0	0	0	0	0	0	0	0	0	0	0	0	0	0	0	0	0	0	0
172.0/1.1 (9557)	172.038	1.09	9557	155.639	65.4124	78.9211	108.243	41.5478	35.5185	22.2214	49.2597	49.4552	0	40.0683	31.2843	38.6109	38.6835	94.1645	89.0339	89.5325	0	127.889	21.5554	74.4179	0	106.929	37.2958	89.2923	86.7827	165.104	32.6241	52.7145	34.6966	0	0	0	0	0	0	0	0	0	0	0	0	0	0	0	0
172.1/1.1 (9561)	172.06	1.09	9561	0	0	0	0	0	0	37.9409	68.4168	50.2369	0	54.5157	57.9412	34.4962	6.87015	0	0	0	0	0	0	0	0	0	0	0	0	0	0	0	0	0	0	0	0	0	0	0.904604	0	0	1.03978	0	1.75643	1.31478	0	1.09997	0
172.1/1.0 (9562)	172.062	1.03	9562	0	0	0	0	0	0	0	0	0	34.0091	0	0	0	3.83229	0	0	0	0	0	0	0	0	0	0	0	0	0	0	0	0	0	0	0	0	0	0	0	0.749981	0	0	0	0	0	0	0	0
172.1/3.7 (9564)	172.095	3.67	9564	0	0	0	0	0	0	0	0	0	2.87574	0	0	0	0	1.724	0	0	0	0	0	0	0	0	0	0	0	0	0	0	0	0	0	0	0	0	0	1.1349	0	0	0	0	0	0	0	0	0
172.1/4.6 (9570)	172.098	4.57	9570	0	0	0	0	0	0	57.0345	26.54	0	53.469	30.2498	20.2744	25.8214	59.1055	0	0	0	0	0	0	0	0	0	0	0	0	0	0	0	0	0	0	0	0	0	0	0	0	0	0	0	0	0	0	0	0
172.1/3.5 (9572)	172.114	3.47	9572	0	8.72167	0	0	0	0	0	0	19.1283	0	0	0	14.7156	11.4437	27.3084	0	0	0	0	4.20329	2.50956	0	0	0	7.71207	3.68289	7.37131	0	0	4.2144	0	0	0	0	0	0	0	0	0	0	0	0	0	0	0	0
173.0/9.1 (9591)	173.032	9.13	9591	0	0	0	165.788	7.58398	0	0	8.24326	0	0	17.5743	20.8265	0	0	0	20.9503	0	0	2.14419	3.2089	15.3888	2.66965	12.1467	20.5943	10.4416	0	0	14.4367	9.32852	5.76997	0	0	0	10.788	10.2201	38.1004	27.9196	25.9658	21.02	0	0	0	0	0	0	0
173.0/1.1 (9593)	173.041	1.06	9593	0	0	0	0	0	0	0	0	0	0	3.37674	0	0	0	0	11.5286	0	0	9.40105	6.01127	0	13.1796	4.81906	7.27873	7.71787	8.12001	9.40138	2.71317	3.11988	0	0	0	0	0	0	0	13.7357	18.8921	14.0115	0	5.75558	5.92609	0	0	0	0
173.1/1.0 (9594)	173.056	1.01	9594	0	0	0	0	0	0	14.3595	5.07371	0	0	0	0	6.59658	26.4366	0	0	0	0	0	0	0	0	0	0	0	0	0	0	0	0	0	0	0	0	0	0	0	0	0	0	0	0	0	0	0	0
173.1/3.5 (9613)	173.091	3.53	9613	0	7.8348	12.5526	0	5.81879	0	0	4.47528	6.19161	0	5.35645	49.6531	55.2224	85.7087	50.1252	1.60326	4.50218	0	0	0	1.13416	0	0	0	0	0	0	11.0341	0	0	0	0	0	0	0	0	0	0	1.69889	0	0	0	2.12144	0	0	0
173.1/1.1 (9614)	173.091	1.09	9614	68.6824	64.1264	66.1942	38.1881	68.7534	83.3956	110.568	91.6148	84.6199	91.2385	105.713	120.032	103.733	116.827	93.0217	142.233	149.034	118.387	117.777	122.825	138.898	135.071	136.029	145.527	139.738	150.76	116.487	175.097	140.647	132.488	0	0	0	0	0	0	0	0	0	0	0	0	0	0	0	0
173.1/3.0 (9621)	173.126	3	9621	0	0	0	0	0	0	0	0	2.65376	0	0	0	5.45761	0	8.70947	0	0	0	0	0	0	0	0	0	1.68451	0	0	0	24.3223	0	0	0	0	0	0	0	0	0	0	0	0	0	0	0	0	0
173.1/2.8 (9623)	173.127	2.83	9623	27.0924	0	0	0	0	0	0	0	2.11471	0	0	1.08427	0	2.02841	2.12409	3.42006	0	0	0	0	0	0	0	0	0	0	1.23432	0	9.35836	0	0	0	0	0	0	0	0	0	0	0	0	0	0	0	0	0
173.1/15.0 (9632)	173.13	15.01	9632	0	0	1.98861	0	0	0	0	6.44119	8.27869	0	0	0	3.06934	0	0	0	4.55229	0	0	3.22189	5.04603	2.7841	4.15049	2.90465	5.00235	3.80259	4.19807	4.59742	0	0	0	3.99371	3.97291	0	0	0	6.546	0	0	0	0	4.80602	1.51278	6.19307	0	0
173.1/15.0 (9635)	173.133	14.96	9635	11.88	4.486	0.808964	0	0	0	6.40558	0	0	3.94896	0	2.15644	0	3.83788	0	0	1.83582	2.11723	22.1555	0	0	0	0	3.38596	0	0	0	0	9.46435	0	2.36126	0	0	0	4.28383	2.03247	0	7.85413	7.7742	1.87483	2.39474	0	2.22204	0	0	0
174.0/1.0 (9646)	174.017	1.01	9646	0	0	0	0	0	0	6.78433	9.54145	15.0602	71.6589	0	17.2956	26.129	55.9839	13.6	0	0	0	0	0	0	0	0	0	0	0	0	0	0	0	0	0	0	0	0	0	0	0	0	0	0	0	4.66223	0	0	0
174.0/9.2 (9649)	174.047	9.19	9649	0	0	0	0	0	0	0	0	0	0	0	0	0	0	0	0	0	10.3999	0	0	0	0	0	0	0	0	0	0	0	0	0	0	0	0	4.62822	3.93678	0	0	0	0	0	0	0	0	0	0
174.1/9.2 (9651)	174.051	9.18	9651	0	0	0	0	0	0	0	0	0	0	0	0	0	0	0	3.55116	0	0	0	0	0	0	0	0	0	0	0	0	0	5.35514	0	0	0	0	0	0	0	0	3.33391	0	0	0	0	0	0	1.73582
174.1/1.2 (9652)	174.052	1.15	9652	0	0	0	0	0	0	0	10.3984	0	0	60.4196	0	0	0	0	0	47.3997	0	0	0	11.806	0	65.0563	77.7283	0	0	0	0	0	0	0	0	0	0	0	0	0	0	0	0	0	0	0	0	0	0
174.1/9.1 (9653)	174.053	9.12	9653	0	0	0	0	0	2.43535	3.14942	0	0	0	0	0	0	0	0	0	0	0	0	0	0	0	8.1452	0	0	0	0	0	0	0	0	0	0	12.824	0	0	0	0	0	0	0	0	0	0	0	0
174.1/1.9 (9656)	174.054	1.87	9656	0	0	0	0	1.33689	0	0	0	0	0	120.677	0	0	0	0	0	271.418	0	0	0	0	0	344.612	356.097	0	0	0	0	0	3.94919	0	0	0	0	0	0	0	0	0	0	0	0	0	0	0	0
174.1/1.2 (9658)	174.054	1.21	9658	0	0	0	0	0	0	0	4.24646	5.13771	37.2388	2.39665	25.9558	8.12511	0	0	55.741	3.28545	43.8352	6.22073	7.56634	0	76.283	6.30399	0	44.2164	0	31.8722	0	0	0	0	0	0	0	0	0	0	0	0	0	0	0	0	0	0	0
174.1/1.8 (9660)	174.055	1.76	9660	2.97526	0	0	0	0	0	3.14163	5.02572	1.75716	67.9263	0	60.572	14.7241	10.8317	0	223.981	0	0	66.6758	24.6385	46.0332	364.149	4.87049	0	172.282	62.1044	137.556	39.0647	5.34576	0	0	0	0	0	0	0	0	0	0	0	0	0	0	0	0	0
174.1/2.4 (9661)	174.055	2.37	9661	0	0	0	0	0	3.59284	9.64141	2.76077	0	0.283189	8.88875	2.85	12.063	0	0	0	0	0	0	0	0	0	0	0	0	0	1.36368	0	2.30502	1.49818	0	0	0	0	0	0	0	0	0	0	0	0	0	0	0	0
174.1/6.8 (9670)	174.058	6.76	9670	0	0	0	0	0	0	135.763	0	129.547	134.468	118.665	119.484	122.368	0	149.001	125.889	60.2396	0	74.9878	58.3348	77.5977	75.0428	90.0445	1.16849	104.021	81.8682	104.11	82.0373	111.192	33.6458	0	0	0	0.409754	4.86379	0	107.083	99.128	114.01	131.198	127.342	198.201	173.413	142.835	177.673	181.889
174.1/1.5 (9671)	174.058	1.49	9671	0	0	0	0	0	0	0	0	1.4062	0	0	1.82508	0	0	0	0	0	13.6763	0	0	0	0	0	0	0	0	0	0	0	0	0	0	0	0	0	0	0	0	0	0	0	0	0	0	0	0
174.1/1.0 (9674)	174.08	1.02	9674	0	0	0	0	0	0	0	0	0	70.0536	0	87.3509	0	0	0	0	0	0	0	0	0	0	64.9496	88.7469	0	0	0	0	0	0	1.4318	1.16042	0	1.31968	0.972755	0	0	0	0	0	0	0	0	1.72575	0	0
174.1/5.6 (9679)	174.111	5.56	9679	26.6781	0	5.05248	0	0	1.62657	0	0	22.8835	0	14.1075	0	0	0	29.7116	0	2.62786	0	0	0	13.4472	0	22.361	18.5023	15.4882	0	0	2.50917	14.7742	1.57443	0	0	0	0	0	0	0	0	0	0	0	0	0	0	0	0
174.1/1.1 (9687)	174.125	1.1	9687	0	0	0	0	0.502972	0	14.0645	0	0	0	0	0	2.59035	0	0	0	0	14.4662	0	0	0	0	0	0	0	0	0	0	0	0	0	0	0	0	0	0	0	0	0	0	0	0	0	0	0	0
174.1/1.4 (9690)	174.134	1.36	9690	33.9733	0	14.9292	0	4.69061	0	0	0	0	0	0	0	0	0	0	0	0	0	0	0	0	0	0	0	0	0	0	0	5.79006	0	0	0	0	0	0	0	0	0	0	0	0	0	0	0	0	0
174.1/1.5 (9691)	174.134	1.53	9691	0	0	0	16.8798	0	0	0	0	0	0	0	0	0	0	0	0	3.40579	0	0	0	0	0	0	0	0	0	0	0	0	6.17326	0	0	0	0	0	0	0	0	0	0	0	0	0	0	0	0
175.0/1.3 (9700)	174.991	1.35	9700	0	0	2.54446	11.8889	0	0	0	0	0	5.67433	0	0	0	0	0	0	0	0	35.0138	0	2.18684	73.6784	0	0	0	0	6.52336	0	0	0	0	0	0	0	0	0	0	0	0	0	0	0	0	0	0	0
175.1/1.8 (9718)	175.086	1.85	9718	39.3996	39.3671	77.3511	97.1848	43.3771	46.0639	40.8522	63.6734	98.9585	78.8385	88.1334	75.3572	72.5283	106.906	28.673	77.9552	82.1728	0	150.835	47.7336	74.3764	173.137	85.051	90.7309	109.2	88.373	147.645	86.3215	91.6444	97.3629	0	0	0	0	0	0	0	0	0	0	0	0	0	0	0	0
175.1/4.5 (9732)	175.109	4.48	9732	0	4.52196	0	0	0	0	0	9.7367	0	16.4464	0	0	0	0	0	0	4.00269	0	6.30498	0	0	0	1.56549	0	0	1.91446	0	0	0	0	0	0	0	0	0	0	0	0	0	0	0	0	0	0	0	0
175.1/4.0 (9735)	175.116	3.98	9735	0	0	0	0	0	0	0	0	0	0	0	1.06672	0	0	0	0	0	0	0	0	2.25927	0	0	3.20037	0	0	0	0	13.7524	0	0	0	0	0	0	0	0.819012	0	0	0	0	0	0	0	0	1.16293
175.1/1.3 (9736)	175.116	1.26	9736	0	0	0	0	0	0	0	0	0	0	0	0	0	0	0	0	45.3327	0	0	0	0	0	0	74.6467	0	0	0	47.934	0	47.3379	0	0	0	0	0	0	0	0	0	0	0	0	0.84441	0	0	0
175.1/1.0 (9752)	175.119	1.04	9752	11238.6	14873.5	15069.8	0	0	0	0	0	16579.6	0	16320.5	16650.7	14747.7	15044.4	14532.4	13972.7	15314.1	0	13690.4	0	14600.8	14591.2	15627.4	15654.4	15434.3	14562.4	11941.7	14102.8	13103.5	0	7.41663	9.17082	2.66009	13.0016	22.7478	12.7729	0	0	4.92637	0	0	1.61785	0	2.59676	0	13.8674
175.1/1.3 (9753)	175.119	1.33	9753	80.3488	0	0	0	0	0	0	0	0	0	0	0	0	0	0	59.2024	0	0	103.188	0	0	147.542	0	0	0	66.4833	98.5873	0	51.0972	0	0	0	0	2.01184	0	0	1.21618	0	2.51689	2.19276	7.32431	0	0	0	0	0
175.1/3.4 (9760)	175.122	3.36	9760	0	0	0	0	0	0	1.71031	0	0	0	0	2.86973	0	0	0	0	0	0	0	0	0	0	0	0	0	4.18962	0	0	0	0	0	0	0	0	0	0	0	0	0	0	0	0	0	0	0	0
175.1/11.5 (9767)	175.147	11.49	9767	90.4576	61.5699	65.5984	32.6135	38.844	26.5736	0	72.4555	86.7904	0	98.7691	70.1543	63.3442	39.3	49.9162	51.521	51.3327	0	30.8676	40.8632	41.8208	26.1862	65.3496	48.6853	43.5509	35.9882	37.2325	46.7586	17.3541	36.2952	51.4781	89.8262	64.7807	57.2078	44.9275	46.9668	57.3516	51.1393	55.7517	58.9865	52.6781	57.5176	94.1607	84.2196	61.6558	49.6279
175.2/11.5 (9774)	175.15	11.5	9774	0	0	0	0	0	0	69.2291	0	0	59.9989	0	0	0	0	0	0	0	63.0976	0	0	0	0	0	0	0	0	0	0	0	0	0	0	0	0	0	0	0	0	0	0	0	0	0	0	0	0
176.1/3.2 (9785)	176.067	3.23	9785	0	0	0	14.7822	0	0	0	0	0	0	0	0	0	0	0	0	0	0	0	2.91976	0	0	0	0	0	0	0	0	0	21.6199	0	0	0	0	0	0	0	0	0	0	2.19888	0	0	0	0	0
176.1/4.2 (9786)	176.068	4.19	9786	0	0	0	0	0	0	0	0	0	0	0	6.94736	7.44597	7.62431	0	0	4.67826	0	0	0	9.78245	0	7.36954	11.6119	13.1571	0	0	0	0	0	0	0	0	0	0	0	6.06004	0	24.3469	5.30652	0	12.3741	9.80101	2.98369	12.2697	10.5486
176.1/3.0 (9788)	176.069	3.02	9788	0	0	0	0	0	0	0	0	0	0	0	0	0	0	0	0	0	0	0	0	0	0	0	0	0	0	0	0	0	0	0	0	0	0	0	3.12785	12.2197	0	23.8922	0	0	0	0	12.8371	9.58089	0
176.1/3.8 (9790)	176.07	3.77	9790	0	0	2.62497	0	0	0	0	154.268	207.414	0	136.057	109.21	113.394	113.743	256.243	68.6742	51.8867	0	108.492	66.205	93.7017	87.777	106.02	0	124.011	71.5138	12.6178	60.6681	79.1904	31.4371	0	0	0	0	0	0	310.497	241.042	424.766	266.229	230.127	186.256	338.976	193.278	300.546	466.327
176.1/3.3 (9791)	176.07	3.27	9791	0	0	15.3367	33.724	0	0	0	25.0431	0	0	0	0	0	6.43157	0	0	12.231	0	8.16588	0	5.24051	0	4.31539	0	17.6285	68.6162	0	20.0325	19.1045	0	0	0	0	0	0	0	25.5761	0	0	3.57976	4.14106	16.6382	0	0	107.517	3.54189
176.1/3.5 (9795)	176.07	3.51	9795	39.8667	0	0	3.62677	0	0	0	142.262	165.873	0	137.806	159.355	121.928	182.864	283.891	721.519	572.369	0	452.952	283.221	312.992	398.017	372.338	332.837	494.097	212.119	547.859	530.404	875.599	711.833	0	0	0	151.633	61.4795	136.457	935.929	972.873	961.256	668.693	648.136	655.545	1118.2	675.197	591.726	757.2
176.1/6.9 (9797)	176.07	6.93	9797	2.40787	0.752298	1.94162	13.9068	43.1214	45.0456	600.277	620.071	689.921	487.668	552.432	474.642	500.936	527.413	827.515	0	0	0	202.391	123.584	147.794	138.21	133.117	166.133	193.47	186.117	522.849	0	15.2885	0	0	0	0	30.6326	27.3003	30.0688	19.476	1.33601	0	7.23257	0	0	14.8651	0	0	0
176.1/3.8 (9800)	176.071	3.81	9800	0	0	0	16.4901	0	0	187.681	0	0	107.713	0	0	0	0	0	0	0	44.7736	0	0	0	0	0	0	0	0	0	0	0	0	0	0	0	0	0	0	0	0	0	0	0	0	0	0	0	0
176.1/9.1 (9801)	176.072	9.15	9801	0	0	0	8134.85	9713.15	8455.64	3275.22	2836.45	3610.46	3466.64	3473.61	4124.62	3217.72	2322.9	4552.98	8055.37	5890.1	6525.91	2073.64	5923.16	6843.76	6379.56	6927.58	6811.33	7550.01	4961.94	6869.66	6612.47	6088.79	4273.64	0	0	0	10346.7	10471.6	9320.79	2989.49	3006.79	3546.88	0	0	0	0	0	0	382.704
176.1/3.6 (9803)	176.072	3.59	9803	0	0	0	0	0	0	148.767	0	0	126.357	0	0	0	0	0	0	0	449.588	0	0	0	0	0	0	0	0	0	0	0	0	0	0	0	0	0	0	0	0	0	0	0	0	0	0	0	0
176.1/4.2 (9804)	176.072	4.18	9804	0	0	0	0	0	0	0	0	16.2905	5.20594	8.55342	0	0	0	15.453	0	0	0	1.46607	0	0	0	0	0	0	5.03192	0	0	0	0	0	0	0	0	0	0	0	5.84569	0	0	0	0	0.846246	0	0	0
176.1/3.1 (9806)	176.073	3.13	9806	0	0	0	0	0	4.60169	99.732	76.4218	130.536	123.746	108.627	92.7777	128.783	160.663	245.746	0	0	5.6634	0	0	0	0	0	1.63367	0	0	52.0739	0	0	0	0	0	0	0	3.39752	0	0	0	0	0	0	0	0	0	0	0
176.1/4.1 (9816)	176.091	4.12	9816	0	0	0	0	0	0	0	0	0	0	0	0	0	0	0	0	0	0	0	0	0	0	0	0	0	0	0	0	0	0	0	0	0	4.30416	10.0356	4.76976	0	0	0	0	0	0	0	0	0	0
176.1/1.3 (9822)	176.12	1.26	9822	0	0	7.52742	0	21.61	0	0	0	0	0	0	0	0	0	0	0	0	0	7.29562	0	0	13.7388	8.9912	0	0	0	8.29841	0	8.74119	3.34253	0	0	0	0	0	0	0	0	0	0	0	0	0	0	0	0
177.1/14.2 (9846)	177.09	14.19	9846	69.5946	72.9878	80.462	44.1641	57.1715	53.429	68.2726	68.1947	104.05	65.2377	102.88	71.7887	77.1757	58.0194	59.2559	68.9355	60.7313	0	31.4527	0	0	25.7117	99.796	59.5136	75.9582	56.9927	14.2603	68.3547	49.9974	59.178	56.011	103.703	91.5122	73.0952	67.4257	59.1317	76.8575	76.3966	80.6819	74.4111	65.5878	67.7395	83.2273	93.6573	76.9848	75.1611
177.1/2.9 (9852)	177.101	2.93	9852	16.5807	0	0	0	0	0	0	0	0	0	0	0	0	0	0	21.5532	0	0	0	0	0	0	0	0	0	0	0	4.31823	43.8274	0	0	0	0	0	0	0	0	0	0	0	0	0	0	0	0	0
177.1/6.8 (9854)	177.102	6.81	9854	0	0	0	0	0	0	0	0	0	0	5.8325	0	0	0	0	11.1914	0	0	0	0	0	0	0	6.09052	0	0	0	0	0	0	0	0	0	0	0	0	3.82521	0	6.58221	0	0	20.4321	0	0	0	0
177.1/13.9 (9859)	177.126	13.91	9859	23.6603	25.3887	33.5345	0	25.2795	0	0	31.7074	37.9126	0	39.8773	28.9857	28.6618	20.737	26.2816	25.2719	27.2519	0	14.0973	24.2832	25.7435	8.81091	28.8543	20.4555	23.4818	18.6924	0	23.4629	13.3775	18.2954	17.6457	40.5855	40.4061	32.2045	28.9152	20.6711	39.6183	29.5074	32.6731	30.9436	30.1729	32.3955	35.1795	42.5092	37.77	37.1812
177.2/14.3 (9864)	177.163	14.29	9864	57.9961	53.7513	52.3872	37.0883	42.7404	38.0839	0	60.8602	64.9555	50.3274	59.2057	58.3527	62.0134	0	48.9486	50.7803	47.6993	48.7238	35.6197	49.5973	48.3645	43.3899	56.0098	40.3555	48.8138	53.1327	26.2294	46.5674	42.0003	30.2074	44.5748	65.5246	63.1694	62.112	56.3186	45.6362	49.8969	53.2011	62.9861	62.5911	48.6006	59.9932	60.5354	65.2626	61.5612	54.5093
178.0/1.2 (9916)	177.957	1.24	9916	0	0	1.52701	712.612	0	5.41521	0	0	0	0	0	0	0	0	0	0	0.632771	0	0	0	0.677975	0	0	0	0	5.22979	0	0	52.0421	54.3746	0	0	0	0	0	0.667613	3.34861	1.83335	0	0	0	0.733528	1.62525	1.16883	0	0
178.0/1.1 (9924)	178.027	1.1	9924	0	0	0	0	0	0	0	0	0	0	0	0	9.52233	0	3.0884	0	0	0	0	0	0	3.91938	0	0	0	0	7.53262	0	0	0	0	0	0	0	0	0	0	0	0	0	0	0	0	0	0	0
178.1/4.6 (9931)	178.086	4.58	9931	0	0	0	0	0	0	124.999	0	120.059	0	122.734	104.868	103.065	0	136.786	6.95604	11.8878	0	0	0	0	58.3375	55.4428	61.0632	47.0798	0	0	0	29.1448	0	0	0	0	0	0	0	12.2105	27.8486	29.4592	35.26	0	0	69.9314	33.0305	36.9731	24.5013
178.1/1.1 (9933)	178.087	1.1	9933	0	0	0	0	0	0	0	0	3.39015	0	4.48395	5.39771	7.40351	0	0	0	0	0	0	0	0	0	0	0	7.49803	0	0	0	0	0	0	0	0	0	0	0	0	0	0	0	0	0	0	0	0	0
178.1/4.5 (9935)	178.087	4.48	9935	0	0	0	0	0	0	0	125.844	0	125.829	0	0	0	134.517	0	0	0	20.6702	68.15	10.2714	0	0	0	0	0	68.6383	92.883	0	1.50056	4.43928	0	0	0	0	0	0	3.21455	0	0	0	2.37152	0	0	0	0	0
178.1/14.7 (9946)	178.12	14.74	9946	0	0	0	0	0	0	0	0	0	0	0	0	0	0	0	0	5.58304	0	0	0	0	0	0	0	0	0	0	0	0	0	0	0	0	0	0	0	0	0	1.77597	0	0	0	0	0	0	0
178.1/1.1 (9956)	178.122	1.11	9956	0	0	0	0	0	0	0	0	0	0	0	7.59777	0	0	0	0	0	0	0	0	0	0	0	0	0	0	0	0	0	0	61.7562	75.6923	91.0262	59.6269	69.5929	62.816	31.1368	31.4675	48.7014	27.9829	35.8409	39.0683	20.3506	43.2283	43.1155	64.3632
178.6/2.6 (9983)	178.612	2.62	9983	0	0	0	0	0	0	0	0	0	0	0	0	0	0	0	0	0	0	0	0	0	0	618.295	484.117	400.692	0	0	0	0	0	0	0	0	0	0	0	0	0	0	0	0	0	0	0	0	0
178.6/2.2 (9984)	178.612	2.15	9984	0	0	0	0	0	0	0	0	0	0	0	0	0	0	0	0	0	0	0.310744	231.902	165.789	101.71	10.1462	19.6291	22.9265	516.725	590.306	0	0	0	0	0	0	0	0	0	0	0	0	0	0	0	0	0	0	0
179.0/6.8 (9989)	179.033	6.83	9989	0	0	0	0	0	0	0	0	0	0	0	0	0	0	0	0	0	0	150.068	34.9226	115.251	24.7326	7.86647	17.0225	307.578	0	0	0	0	0	0	0	0	0	0	0	0	0	0	0	0	0	0	0	0	0
179.0/9.1 (9990)	179.041	9.14	9990	0	0	0	545.833	271.198	249.178	182.88	185.682	182.035	163.822	185.011	215.319	172.561	120.532	175.753	251.103	254.159	282.231	51.1442	221.594	248.131	162.037	253.655	231.555	243.524	187.874	186.316	254.988	226.394	188.217	0	0	0	300.185	253.596	283.221	253.32	241.828	262.626	0	0	0	0	0	0	63.6052
180.0/1.5 (10020)	180.015	1.45	10020	0	0	0	0	0	1.07963	0	0	0	79.2896	0	0	0	112.797	0	0	0	0	0	0	0	0	0	0	0	0	0	0	0	0	0	0	0	0	0	0	0	0	0	0	0	0	0	0	0	0
180.1/1.8 (10035)	180.086	1.8	10035	0	0	0	0	0	0	2.17771	2.61315	0	0	0	17.2935	0	0	24.2828	0	0	0	0	0	0	7.36358	0	0	0	0	36.4928	0	0	0	0	0	0	0	0	0	1.75824	1.07046	1.50043	0	0	0	0	0	0	0
180.1/1.1 (10038)	180.087	1.14	10038	0	0	0	0	0	0	45.0898	37.0876	41.893	20.827	39.7059	52.5416	30.5168	35.3569	51.6952	0	0	0	16.7823	0	0	0	8.03156	0	0	0	0	0	0	0	0	0	0	0	0	0	29.3525	37.514	29.5181	2.4212	0	4.37062	2.80858	0	0	0
180.1/5.5 (10042)	180.101	5.46	10042	0	0	0	0	0	0	24.4559	20.536	34.1291	26.9559	9.13281	35.2132	36.791	38.5792	53.9409	0	0	0	0	0	0	0	0	0	0	0	0	0	0	0	0	0	0	0	0	0	0	0	0	0	0	0	0	0	0	0
180.1/4.7 (10043)	180.101	4.65	10043	0	0	0	0	0	0	0	0	0	0	0	0	0	120.82	0	0	0	0	122.783	105.743	0	0	0	0	0	146.172	236.139	0	0	0	0	0	0	0	0	0	0	0	0	9.32185	8.23392	0	0	0	0	0
180.1/4.2 (10045)	180.101	4.24	10045	14.5723	0	0	0	0	0	455.551	499.371	696.197	748.107	580.74	595.748	585.685	566.024	794.865	574.776	870.387	0	0.860133	0	0	70.7716	39.5315	34.764	2.54685	0	4.45888	9.1979	16.0034	0	0	0	0	0	0	0	0	0	0	0	0	0	0	0	0	0
180.1/3.7 (10046)	180.134	3.72	10046	45.2065	0	6.10944	0	3.98426	0	0	0	0	0	0	0	0	0	2.08554	0	0	0	0	0	0	0	0	0	0	0	0	0	0	0	0	0	0	0	0	0	0	0	0	0	0	0	0	0	0	0
180.2/10.2 (10048)	180.173	10.16	10048	6.64483	3.28585	3.72549	0	0	0	0	12.7814	6.11595	0	8.70257	7.16296	1.51975	0	0	0	0	0	0	0	1.54817	0	3.80127	0	0	0	0	4.293	0	0	0	24.6741	6.49683	3.2328	2.09298	0	6.5643	8.20385	6.47332	2.62803	0	6.35395	16.5899	8.05072	16.2094	4.073
181.0/4.9 (10062)	181.048	4.92	10062	0	0	0	0	0	0	0	0	0	0	0	0	0	0	0	0	0	0	0	280.863	2972.7	1181.03	801.607	1068.74	10055.5	0	0	0	0	0	0	0	0	0	0	0	0	0	0	0	0	0	0	0	0	0
181.0/4.8 (10063)	181.049	4.75	10063	0	0	0	0	0	0	0	0	0	0	0	0	0	0	0	0	0	0	3733.54	0	2.42097	0	0	0	0	4936.37	8520.71	0	0	0	0	0	0	0	0	0	0	0	0	0	0	0	0	0	0	0
181.1/4.1 (10065)	181.083	4.09	10065	0	0	0	0	0	0	0	0	0	0	0	0	0	0	0	0	0	0	0	0	0	0	0	0	0	0	0	0	0	0	0	0	0	0	0	0	0	3.97385	54.0526	0	0	10.0522	0	0	1.06004	0
181.1/4.8 (10067)	181.084	4.8	10067	0	0	0	0	0	0	0	0	0	0	0	0	0	0	0	0	0	0	0	0	0	0	0	0	0	0	0	0	0	0	0.56061	0	0	0	0	0	14.9795	32.871	117.472	13.425	0	45.8675	0	0	0	0
181.1/6.3 (10068)	181.084	6.3	10068	0	0	0	0	0	0	0	0	0	0	0	1.56599	0	0	1.41624	0	0	0	1.15382	0	0	1.59197	0	0	0	0	0	0	0	0	0	0	0	0	1.57159	0	15.5401	51.0916	174.069	9.63265	0	44.2678	4.05628	0	0	0
181.1/3.3 (10070)	181.085	3.31	10070	0	0	0	0	0	0	0	0	0	0	0	0	0	0	0	0	0	0	0	0	0	0	0	0	0	0	0	0	0	0	0	0	0	0	0	0	7.43639	42.2693	149.389	0	0	22.8829	0	0	0	0.732978
181.1/3.1 (10071)	181.085	3.12	10071	0	0	0	0	0	0	0	0	0	0	0	35.3757	3.85818	0	0	0	0	0	0	0	0	0	0	0	0	0	0	0	0	0	0	0	0	0	0	0	0	0	97.121	0	0	0	0	0	0	0
181.1/3.5 (10076)	181.087	3.5	10076	0	0	0	0	0	0	35.7207	0	15.5021	27.361	10.7097	121.44	64.9426	105.895	127.95	0	0	0	0	0	0	0	0	0	0	0	0	0	0	0	0	0	0	0	0	0	0	0	0	0	0	0	0	0	0	0
181.1/4.7 (10082)	181.096	4.67	10082	305.921	207.918	205.866	171.924	177.68	169.426	194.333	188.932	234.183	0	202.126	221.282	206.737	231.231	307.217	293.693	227.28	0	0	0	22.0364	16.013	0	0	21.0696	0	18.6499	253.537	330.859	182.604	0	0	0	0	0	0	1.16157	2.2337	0	1.06611	0	0.594559	0	0	0	0
181.1/4.7 (10090)	181.099	4.66	10090	0	0	0	0	0	0	0	0	0	160.757	0	0	0	0	0	0	0	241.164	22.6792	0	0	0	0	0	0	0	0	0	0	0	0	0	0	0	0	0	0	0	0	0	0	0	0	0	0	0
181.1/5.0 (10096)	181.133	4.99	10096	0	0	0	0	0	0	188.669	171.56	205.516	169.338	168.403	122.067	121.019	128.921	254.172	0	0	0	0	0	0	0	0	0	0	0	0	0	0	0	0	0	0	0	0	0	8.68086	11.2583	8.54411	3.12282	0	0	12.2235	0.947715	0.810343	0
181.1/4.3 (10097)	181.133	4.35	10097	0	0	0	0	0	0	0	6.87699	5.45512	0	5.69498	0	0	0	0	0	0	0	0	0	0	0	0	0	0	0	0	0	0	0	0	0	0	0	0	0	0	0	0	0	0	0	0	0	0	0
182.0/9.1 (10112)	182.02	9.13	10112	0	0	0	0	79.8032	81.1526	0	49.5796	43.0172	0	53.5657	53.5365	38.4867	29.84	49.7551	79.569	76.8421	0	10.1022	58.198	68.3705	74.5042	60.497	70.3829	65.9346	53.8401	94.4131	59.4388	82.1322	55.74	0	0	0	1.66046	102.729	83.5123	53.4323	52.245	56.117	0	0	0	0	0	0	0
182.0/9.1 (10113)	182.022	9.15	10113	0	0	0	80.5737	0	0	45.2897	0	0	21.0224	0	0	0	0	0	0	0	80.2754	0	0	0	0	0	0	0	0	0	0	0	0	0	0	0	91.1458	0	0	0	0	0	0	0	0	0	0	0	0
182.0/1.5 (10116)	182.031	1.46	10116	22.3159	1.11271	12.7068	10.0579	0	0	0	0	5.50549	101.032	2.3237	8.79148	48.1612	209.642	0	0	0	3.25719	10.1954	5.61411	0	0	2.24325	12.0628	0	0	3.14111	12.3892	6.35353	0	0	0	0	0	0	0	0	0	0	0	0	0	0	0	0	0
182.0/1.1 (10117)	182.031	1.14	10117	0	0	0	6.42099	0	0	0	0	0	82.3322	0	0	0	11.73	0	0	0	0	0	0	0	0	0	0	0	0	0	0	0	0	0	0	0	0	0	0	0	0	0	0	0	0	0	0	0	0
182.1/1.1 (10122)	182.078	1.13	10122	0	0	0	0	0	0	0	0	0	0	0	0	0	0	0	0	0	0	0	0	0	0	0	0	0	0	0	0	0	0	0	0	0	0	0	0	0	9.76173	0	18.463	9.58027	4.76218	0	13.2525	0	0
182.1/2.8 (10129)	182.08	2.8	10129	0	0	0	0	0	0	0	0	0	14.4639	0	0	0	0	0	0	0	0	36.6338	6.59086	0	0	17.9836	14.7035	0	0	0	0	0	0	0	0	0	0	0	0	0	0	0	0	0	0	0	0	0	0
182.1/6.4 (10134)	182.081	6.39	10134	6.86984	3.96842	0	0	0	0	80.1889	87.9186	105.949	107.168	87.2428	93.4937	96.4654	105.545	137.039	3.13293	0	0	1.13364	0	0	0	0	4.30005	21.199	0	0	0	6.60047	0	0	0	0	0	0	0	89.1825	91.3307	112.377	73.2872	64.72	91.3939	105.872	51.6293	57.4927	0
182.1/1.4 (10135)	182.081	1.36	10135	682.197	1332.26	2247.23	3892.12	622.694	1635.21	1035.61	990.105	1425.55	801.097	1607.25	565.95	2541.1	1456.59	1957.14	4651.15	3618.92	426.337	4940.49	951.582	1951.62	2690.96	3433.88	3663.3	4067.68	1273.89	3197.58	3431.79	1651.62	3723.27	0	0	0	0	0	0	0	0	0	0	0	0	0	0	0	0
182.1/1.2 (10138)	182.082	1.16	10138	8725.98	5953.85	5468.24	9282.68	6773.19	6048.65	5582.31	5303.79	5223.8	5461.81	5637.16	5499.29	4939.29	5546.02	5811.19	7445.14	4974.29	4941.64	7090.7	7055.71	5678.92	7314.26	5385.48	5482	7726.78	4962.23	7073.41	7917.7	7971.76	6754.45	0	0	0	0	0	0	0	0	0	0	0	0	0	0	2.08782	0
183.0/1.0 (10169)	183.049	1.02	10169	0	0	0	46.688	0	27.0277	0	0	0	0	0	0	0	0	0	0	0	0	0	0	0	0	0	0	0	0	0	0	10.7257	27.6721	0	0	0	0	0	0	0	0	0	0	0	0	0	0	0	0
183.1/2.9 (10176)	183.075	2.9	10176	0	0	0	0	0	0	0	5.61294	6.34225	0	2.65098	0	5.61641	0	0	0	0	0	0	0	0	0	0	0	0	0	0	0	0	0	0	0	0	0	0	0	0	0	0	0	0	0	0	0	0	0
183.1/4.5 (10190)	183.1	4.53	10190	0	0	0	0	0	0	0	0	0	0	0	0	0	0	1.50911	0	0	0	0	0	0	0	0	0	0	0	0	0	0	0	0	0	0	0	0	0	12.4534	25.7136	70.9651	73.9936	0	179.212	0	0	0	0
183.1/3.6 (10200)	183.112	3.64	10200	0	0	34.6085	0	27.1271	20.4041	66.3525	0	66.1959	0	91.0325	71.6062	0	0	78.934	54.3913	50.2985	23.62	0	53.9985	53.9404	0	92.262	76.807	61.4331	0	0	53.9161	17.9583	24.4472	0	0	0	0	0	0	0	0	0	0	0	0	0	0	0	0
183.1/3.5 (10204)	183.112	3.52	10204	44.801	46.7308	0	0	0	0	0	67.6686	0	0	0	0	66.8674	65.2094	0	0	0	0	68.4766	0	0	22.3991	16.1219	0	0	50.0168	75.175	4.70705	0	0	0	0	0	0	0	0	0	0	0	0	0	0	0	0	0	0
183.1/3.6 (10206)	183.114	3.61	10206	0	0	0	0	0	0	0	0	0	65.79	0	0	0	0	0	0	0	2.34151	0	0	0	0	0	0	0	0	0	0	4.20402	0	0	0	0	0	0	0	0	0	0	0	0	0	0	0	0	0
183.1/8.8 (10209)	183.137	8.79	10209	22.5391	18.844	18.2353	0	15.7206	4.24692	0	18.7285	26.0412	8.75968	32.3978	22.1929	19.3578	0	12.5302	20.8952	14.1224	0	1.61107	5.4386	13.8371	1.10273	21.6819	8.9838	11.5049	3.70918	2.65464	17.4607	3.15521	11.9438	16.7628	20.9499	20.5363	15.971	14.9105	6.82841	11.7769	15.1038	14.8599	18.3218	14.1078	15.5833	14.4235	22.3045	7.49974	13.4558
184.1/13.5 (10238)	184.074	13.5	10238	0	0	0	0	0	0	0	0	0	3.29783	0	0	0	0	0	0	0	0	0	0	0	0	0	0	0	0	0	0	0	0	0	0	1.75368	0	0	0	0	0	0	0	0	0	0	0	0	0
184.1/1.1 (10239)	184.084	1.15	10239	91.5131	0	62.4678	100.517	66.7731	56.5235	0	57.1947	47.0271	0	58.1041	0	64.0033	0	63.2589	78.0267	40.659	0	90.3346	83.6766	64.7213	0	0	75.3938	0	63.3582	72.1761	0	91.849	58.2594	0	0	0	0	0	0	0	0	0	0	0	0	0	0	0	0
185.0/1.1 (10270)	184.976	1.12	10270	0	0	0	0	0	0	0	0	0	0	0	0	0	0	0	0	0	0	0	0	0	0	0	0	0	0	0	0	0	0	0	0	0	0	0	0	0	0	0	0	0	0	7.32306	0	3.5953	0
185.1/1.7 (10285)	185.091	1.69	10285	78.7105	58.2881	66.2137	173.427	25.2261	33.263	95.1352	85.2722	106.197	61.2544	89.1641	92.9236	99.5962	72.877	41.2388	56.1127	61.1038	13.3818	40.7424	20.9219	18.6209	39.7587	45.3197	24.7966	50.6589	34.8398	53.2547	54.6916	33.1725	81.258	0	0	0	0	0	0	0	0	0	0	0	0	0	0	0	0
185.1/7.0 (10291)	185.113	7.02	10291	0	0	0	3.33861	1.62841	0	0	0	0	0	0	0	0	0	0	0	0	0	0	18.2503	0	0	0	0	0	0	0	0	0	0	0	63.6109	0	0	0	0	0	0	0	0	7.99278	0	0	0	0	0
185.1/14.5 (10302)	185.116	14.47	10302	13.9922	2.33238	2.27668	0	0	0	2.0583	0	0	0	0	0	1.47965	0	0	0	0	0	0	2.29539	5.88001	0	1.98456	0	0	0	0	0	0	0	0	3.17019	0	0	0	0	0	0	0	0	0	0	1.78073	0	0	0
185.1/1.0 (10304)	185.116	1.03	10304	0	0	0	0	0	0	0	0	0	0	0	0	0	0	0	0	0	0	0	0	0	0	0	0	0	0	0	0	0	0	1.62143	3.28185	2.3606	7.04631	2.23479	0	0	2.29819	0	1.03177	0	2.71501	2.17812	2.22135	1.0244	0
185.1/4.9 (10312)	185.128	4.85	10312	756.756	475.34	465.899	476.393	425.47	409.006	475.066	471.321	568.204	0	516.693	523.935	472.762	475.38	794.546	699.544	546.3	0	75.7909	19.7736	37.0689	98.9584	96.0455	38.182	47.0345	25.9212	0	608.165	821.894	430.295	0	0	0	0	0	0	1.26506	1.89701	6.54709	2.36139	0	2.59397	5.55656	0	2.98447	0
185.1/4.7 (10313)	185.128	4.66	10313	136.608	67.0136	126.128	0	0	0	164.805	0	190.904	0	0	0	0	0	120.057	154.089	160.169	0	0	0	39.7632	73.0662	58.6735	56.7003	49.5135	0	36.6931	134.939	163.932	137.769	0	0	0	0	0	0	2.83265	0	0	0	0	0	0	0	0	0
185.1/4.5 (10315)	185.128	4.51	10315	64.0337	41.2008	0	0	103.119	66.0356	0	167.49	0	160.623	170.614	162.985	152.747	170.033	110.93	40.7921	0	0	75.1274	42.2986	0	16.4126	15.08	6.93129	9.72702	43.0133	60.5276	38.9501	48.8098	0	0	0	0	0	0	0	1.14827	6.53454	7.51577	0	0	1.65085	5.52371	0	5.38962	0
185.1/4.9 (10317)	185.13	4.85	10317	0	0	0	0	0	0	0	0	0	386.089	0	0	0	0	0	0	0	493.828	0	0	0	0	0	0	0	0	0	0	0	0	0	0	0	0	0	0	0	0	0	0	0	0	0	0	1.14674	0
185.2/13.4 (10321)	185.154	13.37	10321	1.81876	0	0	0	0	0	0	0	0	0	0	1.91827	0	0	0	0.805265	0	0	0	0	0	0	0	0	0	0	0	0	0	0	0	0.84426	1.48988	0	0	0	0	0	1.99626	0	0	0	0	1.73616	0	0
185.2/3.8 (10325)	185.164	3.82	10325	53.5731	19.3179	28.8638	34.8313	0	19.1411	0	0	0	0	0	0	0	0	0	0	0	0	0	0	0	0	0	0	0	0	0	0	10.8226	6.82686	0	0	0	0	0	0	0	0	0	0	0	0	0	0	0	0
186.0/1.5 (10333)	186.02	1.45	10333	73.6148	124.224	57.4399	0	85.5846	26.3089	76.9461	68.5363	98.3784	37.2361	86.1441	82.089	105.875	65.6292	27.3467	109.272	103.475	66.8157	24.6818	54.1568	123.731	4.29033	149.582	133.595	105.921	78.1337	38.6833	45.4887	1.71365	30.6929	0	0	0	0	0	0	0	0	0	0	0	0	0	0	0	0
186.0/2.0 (10337)	186.021	1.97	10337	0	0	0	0	0	0	0	0	0	0	0	0	0	0	4.02746	0	0	0	0	0	0	0	0	18.2113	0	0	42.9114	0	16.7533	0	0	0	0	0	0	0	0	0	0	0	0	0	0	0	0	0
186.0/3.4 (10338)	186.022	3.44	10338	0	3.94469	0	0	0	11.8148	0	0	0	0	0	3.46968	0	0	0	2.88914	4.06849	2.13668	0	7.9621	0	0	0	0	0	0	0	0	0	0	0	0	0	0	0	0	0	0	0	0	0	0	0	0	0	0
186.0/2.7 (10340)	186.022	2.67	10340	10.7247	4.2252	0	0	0	0	4.24324	0	0	4.29394	0	6.90284	0	0	7.30539	12.4841	0	0	71.0778	0	0	0	0	0	0	0	27.2711	49.707	28.7724	0	0	0	0	0	0	0	0	0	0	0	0	0	0	0	0	0
186.0/3.0 (10341)	186.022	3.03	10341	0	0	4.60339	0	0	0	0	0	0	0	0	0	0	0	0	0	16.1014	0	0	0	0	0	0	0	0	0	0	7.94742	0	0	0	0	0	0	0	0	0	0	0	0	0	0	0	0	0	0
186.0/2.8 (10345)	186.025	2.79	10345	0	0	0	0	14.1346	0	6.31846	0	13.0313	0	3.04886	0	0	0	0	0	0	0	0	0	0	0	0	0	0	0	0	0	0	4.41795	0	0	0	0	0	0	0	0	0	0	0	0	0	0	0	0
186.0/1.0 (10348)	186.042	1.04	10348	0	0	0	129.23	13.0532	40.2935	0	0	0	0	0	0	0	0	0	0	5.61481	0	8.39232	0	5.51189	0	0	9.68074	0	11.8174	0	1.51926	48.9865	39.3286	0	0	0	0	0	0	0	0	0	0	0	0	0	0	0	0
186.1/1.0 (10349)	186.06	1.04	10349	0	0	0	366.165	0	0	0	0	0	0	0	0	0	0	0	0	0	0	0	0	0	0	0	0	0	0	0	0	75.7826	70.5183	0	0	0	0	0	0	0	0	0	0	0	0	0	0	0	0
186.1/3.6 (10351)	186.075	3.61	10351	0	0	0	0	0	0	51.4351	42.4015	37.3934	18.7556	30.3405	18.8904	21.424	0	21.4401	0	0	0	0	0	0	0	0	0	0	0	0	0	0	0	0	0	0	0	0	0	0	0	0	0	0	0	0	0	0	0
186.1/3.0 (10352)	186.076	2.97	10352	0	0	0	0	0	0	11.163	2.23626	5.32668	0	9.03246	0	0	0	75.6203	0	0	0	0	0	0	0	0	0	0	0	0	0	0	0	0	0	0	0	0	0	0	0	0	0	0	0	0	0	0	0
186.1/1.1 (10356)	186.086	1.06	10356	0	3.54185	0	0	0	0	5.97185	7.13504	0	0	0	0	6.0383	7.71769	0	0	0	0	0	0	0	0	7.47009	4.68486	0	0	0	0	0	0	0	0	0	0	0	0	0	0	0	0	0	0	0	0	0	0
186.1/6.9 (10361)	186.089	6.86	10361	0	0	0	0	0	0	19.5056	0	0	38.4274	34.5383	0	0	11.4989	0	0	0	0	0	0	0	0	0	0	0	0	0	0	0	0	0	0	0	0	0	0	0	0	0	0	0	0	0	0	0	0
186.2/13.0 (10377)	186.183	13.04	10377	12.5281	0	0	0	0	0	0	0	0	0	0	0	0	0	0	0	0	0	0	0	0	0	0	0	0	0	0	0	0	0	0	0	0	0	0	0	0	0	0	0	0	0	0	0	0	8.48284
186.2/13.1 (10384)	186.22	13.09	10384	0	0	0	0	0	0	0	0	0	0	0	0	0	0	0	0	0	0	0	0	0	0	0	0	0	0	0	0	0	0	0	0	4.3128	0	4.21957	0	0	0	0	0	0	0	0	0	0	3.51545
186.2/7.7 (10389)	186.221	7.67	10389	643.273	758.804	1063.45	645.016	771.934	740.951	773.153	762.065	1000.68	0	980.098	802.268	804.71	627.334	653.378	705.226	824.223	0	596.824	676.948	745.788	640.091	1056.34	780.544	818.74	718.299	617.455	705.736	695.529	1095.75	1190.5	1282.17	1303.95	1087.9	926.753	1088.88	1085.89	1160.83	1082.67	1157.46	1040.41	1051.44	938.3	1297.35	968.514	1033.51
187.0/1.5 (10408)	187.01	1.48	10408	0	0	2.30201	0	0	0.957085	0	0	0	78.9335	0	0	35.4338	119.528	0	0	0	0	0	1.28014	0	0	0	0	0	0	0	0.643069	0	0	0	0	0	0	0	0	0	0	0	0	0	0	0	0	0	0
187.0/9.1 (10412)	187.03	9.13	10412	0	0	0	3248.11	685.66	597.973	461.531	487.237	493.664	0	467.869	573.27	433.438	268.943	456.106	640.742	622.683	0	132.238	603.725	632.658	418.496	634.773	574.728	590.2	475.552	428.928	655.957	571.346	483.602	0	0	0	814.177	742.532	807.84	653.5	684.269	687.288	0	0	0	0	0	0	157.123
187.1/6.2 (10417)	187.061	6.17	10417	0	0	0	0	0	0	3.24861	13.067	16.9197	6.33234	12.1061	12.334	0	0	14.3619	0	0	0	0	0	1.01272	0	0	0	0	0	0	0	0	0	0	0	0	0	0	0	0	0	0	0	0	0	0	0	0	0
187.1/1.0 (10421)	187.07	1.02	10421	0	0	0	0	0	0	13.5182	5.68755	0	0	0	0	7.26703	0	0	0	5.63139	0	0	0	0	0	0	0	0	0	0	0	0	0	0	0	0	0	0	0	0	0	0	0	0	0	0	0	0	0
187.1/1.1 (10438)	187.107	1.1	10438	227.729	184.614	242.742	188.784	127.64	212.194	82.6563	63.8352	58.0278	68.7752	69.6433	77.2493	79.5473	116.275	82.7266	281.94	298.425	0	78.0115	64.19	79.4154	92.9673	80.0143	42.1524	34.7706	57.3935	35.9413	285.769	491.272	423.979	0	0	0	0	0	0	0	2.50975	0	3.3444	3.68831	2.79714	0	2.40321	1.42127	0
187.1/4.6 (10440)	187.107	4.61	10440	29.6709	13.6727	20.6024	0	0	10.8888	21.9013	6.94237	18.7636	11.071	0	44.1004	30.0407	65.4939	101.972	22.1703	18.7694	11.802	0	0	0	0	0	0	0	0	0	18.3112	29.2873	20.8999	0	0	0	0	0	0	0	0	0	0	0	0	0	0	0	0
187.1/4.4 (10446)	187.109	4.35	10446	0	0	0	0	0	0	12.2333	5.14586	0	0	0	0	0	27.9422	0	0	0	4.32714	0	0	0	0	0	0	0	0	0	0	0	12.2043	0	0	0	0	0	0	0	0	0	0	0	0	0	0	0	0
187.1/2.2 (10454)	187.125	2.17	10454	0	0	0	0	0	0	0	0	0	0	0	0	0	0	0	0	0	0	0	25.8247	23.2957	0	1.07017	0	1.90199	101.314	122.729	0	0	0	0	0	0	0	0	0	0	0	0	0	0	0	0	0	0	0
187.1/2.7 (10455)	187.126	2.71	10455	0	0	0	0	0	0	0	0	0	0	0	0	0	0	2.09608	0	0	0	138.342	0	0	0	130.855	0	77.6257	0	0	0	0	0	0	0	0	0	0	0	0	0	0	0	0	0	0	0	0	0
187.5/3.2 (10468)	187.494	3.24	10468	725.591	212.39	0	0	0	319.28	0	164.095	189.783	0	201.635	171.128	157.218	244.18	390.505	0	0	0	265.621	234.613	0	262.797	7.69941	0	0	300.997	210.966	0	0	0	0	0	0	0	0	0	0	0	0	0	0	0	0	0	0	0
187.5/3.1 (10469)	187.495	3.08	10469	0	38.2461	19.9933	458.21	0	0	0	4.88774	0	13.4636	0	0	9.73413	0	0	169.354	0	0	208.594	0	0	0	136.97	0	160.21	15.8562	244.132	152.123	0	0	0	0	0	0	0	0	0	0	0	0	0	0	0	0	0	0
187.5/3.4 (10471)	187.495	3.36	10471	0	0	271.05	0	270.179	0	0	0	0	0	0	0	0	0	0	298.487	332.166	0	0	0	236.295	0	289.967	250.12	236.303	0	0	398.562	702.69	362.878	0	0	0	0	0	0	0	0	0	0	0	0	0	0	0	0
187.5/3.2 (10474)	187.498	3.23	10474	0	0	0	0	9.51105	0	159.045	0	0	174.054	0	0	0	0	0	0	0	295.695	0	0	0	0	0	0	0	0	0	0	0	0	0	0	0	0	0	0	0	0	0	0	0	0	0	0	0	0
188.0/1.2 (10479)	187.996	1.17	10479	0	0	0	0	0	0	0	0	0	100.622	0	0	12.6919	0	0	0	3.65934	9.0995	0	0	0	0	0	0	0	0	0	0	0	0	0	0	0	0	0	0	0	0	0	0	0	0	0	0	0	0
188.0/1.3 (10480)	187.999	1.32	10480	0	0	0	0	0	0	0	0	0	0	0	2.12343	0	0	0	0	0	0	0	0	0	0	0	0	0	0	4.07789	3.07538	0	0	0	0	0	0	0	0	0	0	0	0	0	0	0	0	0	0
188.0/1.1 (10485)	188.037	1.12	10485	0	0	0	0	0	0	0	0	0	0	0	0	0	0	0	0	0	0	0	0	0	0	0	0	0	0	0	0	0	0	0	2.0423	0.521066	0	0	0	0	0	0	0	0	0	0	0	0	0
188.0/9.1 (10490)	188.046	9.11	10490	0	0	0	0	0	0	92.986	0	0	85.3479	0	0	0	0	64.5233	0	0	138.585	20.6646	0	64.9496	87.3483	0	0	0	0	40.221	0	0	0	0	0	0	0	27.0353	0	0	0	0	0	0	0	0	0	0	0
188.1/1.5 (10492)	188.067	1.53	10492	0	0	0	0	0	0	0.278784	0	0	0	0	0	0	0	0	0	0	0	0	3.46912	0	0	0	0	12.4479	0	0	0	103.348	0	0	0	0	0	0	0	0	0	0	0	0	0	0	0	0	0
188.1/1.2 (10494)	188.067	1.2	10494	0	95.2949	120.104	28.5961	76.3498	161.412	32.1145	32.2755	66.3375	0	42.4154	31.6792	26.4014	11.3327	0	320.284	198.975	0	0	60.8257	126.121	0	225.597	138.892	212.552	67.3025	0	217.302	0	68.4788	0	0	0	0	0	0	0	0	0	0	0	0	0	0	0	0
188.1/2.1 (10496)	188.068	2.1	10496	0	0	6.45365	0	0	0	0	0	0	36.3874	0	0	660.89	0	0	0	0	0	0	0	0	0	0	2.66988	0	168.783	0	0	0	0	0	0	0	0	0	0	0	0	0	0	0	0	0	0	0	0
188.1/3.1 (10500)	188.07	3.08	10500	0	0	195.92	24087.2	0	0	0	0	0	0	0	0	0	0	0	20644.1	0	0	24861.6	0	0	0	0	0	19993.8	0	27735.3	0	0	0	0	0	0	0	0	0	0	0	0	0	0	0.24878	0	0	0	0
188.1/3.3 (10501)	188.07	3.33	10501	0	0	0	0	25187.4	0	0	0	0	0	0	0	0	0	0	0	26464.2	0	0	0	0	0	0	0	0	0	0	0	0	28682.7	0	0	0	0	0	0	0	0	0	0	0	0	0	0	0	0
188.1/2.5 (10502)	188.07	2.49	10502	0	10919	225.051	9181.36	2474.61	0	9336.34	7675.79	0	0	9187.72	8230.2	0	0	35.3938	0	2.96602	0	1.5889	2758.39	17.0896	0	0	618.338	0	357.176	0	0	0	2419.79	0	0	0	0	0	0	0	0	0	0	0	0	0	0	0	0
188.1/2.3 (10504)	188.07	2.26	10504	0	0	386.934	10214.3	3705.25	0	0	0	0	0	0	0	0	0	0	0	0	0	0	0	0	0	0	0	0	0	0	0	0	4520.06	0	0	0	0	0	0	0	0	0	0	0	0	0	0	0	0
188.1/2.0 (10505)	188.07	2.03	10505	0	9.89499	0	0	0	0	0	0	0	0	1.93681	0	0	0	0	0	0	0	0	0	0	0	0	0	0	3433.36	0	0	0	0	0	0	0	0	0	0	0	0	0	0	0	0	0	0	0	0
188.1/3.2 (10506)	188.07	3.23	10506	52706	22817.9	22131.8	0	0	25570.4	17510.3	18261.3	18153.4	0	18713.5	17544.2	19569	20074.3	36432.8	18136.7	0	0	16313.1	19536.4	20340.6	30150.5	23282.7	26371.5	17994.2	28463.7	12026.9	25102.2	48101.9	0	0	0	0	0	0	0	2.15829	10.2937	2.4352	1.20439	2.91718	3.25987	4.9057	6.90465	4.58139	0
188.1/2.9 (10509)	188.07	2.92	10509	0	0	11937.1	0	0	0	0	0	9976.61	0	0	0	0	0	0	0	20235.3	0	59.3047	0	16126.2	1.88432	17649.2	15589.6	0	0	0	22961.9	12.2484	0	0	0	0	0	0	0	0	0	0	0	0	0	0	0	0	0
189.1/6.0 (10563)	189.1	5.97	10563	0	0	0	0	0	0	0	0	0	0	0	0	0	0	0	0	0	0	0	0	3.23308	5.27558	0	0	0	0	0	0	0	0	0	0	0	0	0	0	0	0	0	0	0	0	0	0	0	0
189.1/3.1 (10567)	189.122	3.12	10567	0	0	92.3881	0	99.1664	0	0	0	35.7448	0	0	0	0	0	0	0	147.748	0	0	0	0	0	70.4544	67.4018	83.7643	0	0	272.422	0	0	0	0	0	0	0	0	0	0	1.12343	0	0	0	0	0	0	0
189.1/2.9 (10568)	189.122	2.9	10568	0	0	12.8811	0	92.811	0	3.69376	0	0	0	0	0	0	0	0	0	0	0	0	52.6288	0	0	0	0	0	32.2451	0	0	0	0	0	0	0	0	0	0	0	0	0	0	0	0	0	0	0	0
189.1/2.0 (10569)	189.122	2.03	10569	0	89.4089	87.7217	0	72.8584	72.6058	0	55.3722	0	0	60.6984	0	99.2772	0	0	362.441	260.372	0	0	0	0	0	62.9911	51.8175	54.3897	0	0	38.1933	0	518.561	0	0	0	0	0	0	0	0	0	0	0	0	0	0	0	0
189.1/3.0 (10571)	189.122	3.02	10571	317.932	157.169	65.7773	0	0	99.8146	0	48.6232	2.28643	0	50.2121	66.8713	81.9235	0	96.3124	343.785	131.091	0	0	74.8951	85.7855	0	70.1362	40.5927	0	92.1333	78.5806	134.466	0	333.924	0	0	0	0	0	0	0	2.54358	0	3.37112	0	2.59725	3.48158	0.976739	0	0
189.1/1.7 (10573)	189.123	1.72	10573	535.122	0	25.8859	7.17897	0	0	3.80559	1.90822	0	0	2.19596	3.88534	0	0	3.09308	15.0697	0	0	0	11.6616	0	0	0	0	0	59.3682	5.55343	0	0	12.4077	0	0	0	0	0	0	0	0	0	0	0	0	0	0	0	0
189.1/1.9 (10574)	189.123	1.88	10574	0	270.936	502.197	490.169	276.455	380.518	52.0326	0	94.024	41.5688	0	53.0183	0	117.476	124.416	0	0	0	178.665	30.5392	73.5602	161.514	3.6132	0	0	0	87.3523	457.367	942.247	0	0	0	0	0	0	0	0	0	0	0	0	0	0	0	0	0
189.1/1.1 (10576)	189.123	1.1	10576	869.542	616.066	679.519	1299.87	737.568	767.552	58.4369	145.79	162.165	125.01	159.889	216.517	163.595	224.8	205.393	428.272	403.002	401.348	176.522	167.453	180.919	140.296	149.717	124.378	113.147	158.666	126.036	835.094	1273.9	1349.48	0	0	0	0	0	0	5.4933	4.77206	4.20513	3.07912	3.69842	4.58468	4.01877	3.16842	2.39477	0
189.1/2.9 (10580)	189.125	2.94	10580	0	0	0	0	0	5.21923	54.477	0	0	69.0964	0	0	0	77.6831	0	0	0	184.97	0	0	0	0	0	0	0	0	0	0	0	0	0	0	0	0	0	0	0	0	0	0	0	0	0	0	0	0
189.6/6.0 (10585)	189.569	5.97	10585	9.76355	2.59003	0	31.6407	0	0	0	4.31896	4.91337	0	1.85821	0	2.31926	0	9.06461	4.27406	5.09648	0	0	0	3.76792	12.5262	8.30052	0	0	0	0	0	8.53957	0	0	0	0	0	0	0	0	0	0	0	0	0	0	0	0	0
189.6/6.0 (10587)	189.572	6	10587	0	1.87182	7.1269	0	1.72603	0	0	0	0	4.15978	0	4.47392	0	0	0	0	0	7.46084	0	0	0	0	0	3.45831	5.39093	0	0	6.93523	0	0	0	0	0	0	0	0	0	0	0	0	0	0	0	0	0	0
190.0/2.3 (10591)	190.011	2.28	10591	0	0	0	0	0	0	654.021	566.431	566.981	15.734	583.876	328.978	0	0	401.456	0	0	0	0	0	0	0	0	0	0	0	0	0	0	0	0	0	0	0	0	0	0	0	0	0	0	0	0	0	0	0
190.0/1.2 (10592)	190.012	1.17	10592	0	0	0	0	0	0	2945.76	2023.03	2641.08	1252.33	1749.26	1974.27	1555.72	3570.41	0	0	0	0	0	0	0	0	0	0	0	0	0	0	0	0	0	0	0	0	0	0	0	0	0	0	0	0	0	0	0	0
190.1/3.1 (10602)	190.075	3.09	10602	0	35.0011	6.48432	740.096	0	0	0	0	0	0	0	0	0	0	0	299.956	0	0	380.929	0	0	0	0	0	286.124	0	437.441	0	0	0	0	0	0	0	0	0	0	0	0	0	0	0	0	0	0	0
190.1/3.2 (10604)	190.075	3.24	10604	1266.58	480.312	0	0	0	605.709	296.092	333.685	323.815	0	328.664	300.687	356.429	396.784	726.949	588.489	0	0	512.561	423.656	0	508.085	0	15.2568	0	536.445	382.575	0	0	0	0	0	0	0	0	0	0	0	0	0	0	0	0	0	0	0
190.9/3.9 (10640)	190.931	3.87	10640	0	0	0	0	0	0	0	0	0	0	0	0	0	0	0	0	0	0	0	0	0	0	0	0	0	0	0	0	0	0	0	0	0	0	0	0	3.83255	5.72258	5.20389	0	0	0	9.71063	0	16.4433	12.521
190.9/3.6 (10642)	190.932	3.64	10642	0	0	0	0	0	0	0	0	0	0	0	0	0	0	0	0	0	0	0	0	0	0	0	0	0	0	0	0	0	0	0	0	0	0	0	0	11.7271	6.46756	10.017	8.25014	8.0478	0	5.02618	2.51661	13.9945	7.93604
191.0/1.3 (10652)	190.991	1.27	10652	12.1218	0	11.8532	0	10.4222	0	0	0	0	0	0	0	0	0	0	0	0	0	0	3.9176	0	0	2.58206	5.80951	0	1.97735	0	0	0	0	0	0	0	0	0	0	0	0	0	0	0	0	0	0	0	0
191.0/1.2 (10658)	191.041	1.23	10658	3.13664	5.73377	5.18351	0	0	0	0	0	0	0	0	0	0	0	0	0	2.57839	6.23622	0	0	0	0	0	2.57914	0	0	2.13858	0	0	0	0	0	0	0	0	0	0	0	0	0	0	0	0	0	0	0
191.1/8.3 (10670)	191.103	8.32	10670	22.4176	0	28.2035	10.4739	13.4569	14.1109	0	11.1421	21.1618	13.4245	14.2063	0	4.75872	0	0	11.0605	0	0	8.42715	13.37	12.7266	5.2798	21.3577	8.75266	10.6302	9.70112	15.8322	20.238	17.3446	24.2623	26.7452	13.7099	33.3238	8.0658	12.8284	3.41165	9.35421	2.11406	7.01108	5.60327	13.1261	20.1285	14.4455	20.254	15.629	8.33926
191.1/5.0 (10676)	191.119	5.05	10676	0	0	0	0	0	0	0	0	0	4.23348	0	0	0	0	8.30993	0	0	8.21665	0	0	0	0	0	0	0	0	0	0	0	0	0	0	0	0	0	0	0	0	0	0	0	0	0	0	0	0
192.0/2.2 (10687)	191.997	2.16	10687	0	0	0	0	0	0	0	0.984317	0	0	0	3.35127	0	24.9135	0	0	0	0	0	0	0	0	0	0	0	0	0	0	0	0	0	0	0	0	0	0	0	0	0	0	0	0	0	0	0	0
192.1/2.6 (10695)	192.063	2.58	10695	0	0	0	0	0	0	0	0	0	0	0	0	0	0	0	0	6.74808	0	0	0	0	0	33.2349	0	22.8646	0	0	0	0	0	0	0	0	0	0	0	0	0	0	0	0	0	0	0	0	0
192.1/1.9 (10697)	192.064	1.89	10697	0	0	0	0	0	0	0	0	8.14173	0	0	0	1.095	4.78723	0	0	0	0	0	1.35339	0	0	0	0	0	0	0	0	0	2.29847	0	0	0	0	0	0	0	0	0	0	0	0	0	0	0	0
192.1/2.3 (10698)	192.064	2.28	10698	11.5652	0	0	132.176	0	0	0	0	0	0	0	49.5012	0	11.8512	149.555	2.37673	0	12.4483	1.25548	0	0	2.80443	0	0	2.27196	24.9197	35.733	2.41005	20.7814	1.26638	0	0	0	0	0	0	0	0	0	0	0	0	0	0	0	0
192.1/2.5 (10700)	192.064	2.46	10700	0	0	0	0	0	0	0	0	0	48.5847	0	0	162.288	0	0	39.4367	0	0	3.5728	0	0	0	0	30.4627	0	0	0	0	0	50.6357	0	0	0	0	0	0	0	0	0	0	0	0	0	0	0	0
192.1/1.6 (10702)	192.065	1.58	10702	8.68181	0	0	0	0	0	0	0	0	0	0	0	0	0	132.444	0	0	0	0	0	0	0	0	0	0	0	0	0	51.1717	0	0	0	0	0	0	0	0	0	0	0	0	0	0	0	0	0
192.1/2.3 (10707)	192.066	2.35	10707	0	6.44192	0	0	0	9.70109	215.788	208.504	236.437	0	211.216	22.935	0	0	0	0	1.46452	0	0	0	0	0	0	0	0	0	0	0	0	0	0	0	0	0	0	0	0	0	0	0	0	0	0	0	0	0
192.1/3.8 (10710)	192.067	3.75	10710	0	0	0	0	0	0	0	25.1146	0	0	18.171	0	35.9129	0	0	0	1.45368	0	0	0	7.82342	0	0	7.36767	0	2.44661	0	0	0	0	0	0	0	0	0	0	0	0	0	0	0	0	0	0	0	0
192.1/6.3 (10721)	192.101	6.28	10721	0	0	0	0	0	0	5.39881	5.13643	7.70048	0	0	0.95906	3.05319	5.51587	10.1066	1.94717	0	0	0	0	3.16982	2.41552	0	0	2.58925	0	5.6176	0	0	0	0	0	0	0	0	0	0	0	0	0	0	0	0	0	0	0
193.0/1.4 (10729)	193.045	1.39	10729	0	0	4.73279	0	0	0	0	0	0	0	0	3.54694	35.9912	0	0	0	0	0	0	0	0	0	0	0	0	0	0	0	0	0	0	0	0	0	0	0	0	0	0	0	0	0	0	0	0	0
193.0/1.4 (10731)	193.047	1.37	10731	0	0	0	0	0	0	0	0	0	47.501	2.29295	0	0	78.0535	0	0	0	0	0	0	1.33708	0	0	0	0	0	2.89938	0	0	0	0	0	0	0	0	0	0	0	0	0	0	0	0	0	0	0
193.1/3.1 (10735)	193.094	3.12	10735	0	0	0	0	0	0	14.0729	6.23368	17.1262	0	4.99903	6.83111	7.3488	0	40.091	0	0	0	0	0	0	0	0	0	0	0	0	0	6.77756	2.94973	0	0	0	0	0	0	2.14044	3.68011	9.41922	0	0	0	3.84465	0	1.36584	3.35024
193.1/3.6 (10737)	193.096	3.56	10737	0	0	0	0	0	7.91037	52.9842	53.7169	57.3545	52.9324	47.4416	66.8296	41.1963	60.5109	85.391	269.498	198.228	0	145.812	103.539	131.096	116.841	123.567	140.12	186.781	104.381	203.774	196.002	315.075	246.163	0	0	0	51.84	22.4847	43.0471	351.624	351.57	356.852	242.177	227.475	254.335	413.149	233.523	217.097	211.187
193.1/3.3 (10740)	193.096	3.27	10740	0	0	0	0	0	0	0	0	6.99039	13.124	0	0	0	0	0	0	0	0	0	2.70363	0	0	1.33172	0	0	0	0	6.38734	0	0	0	0	0	0	0	0	3.04402	11.3038	0	0.75497	3.28901	4.48907	9.99592	4.9155	36.7954	43.0894
193.1/3.8 (10738)	193.096	3.77	10738	0	0	0	0	0	0	75.084	50.4458	82.7794	47.2809	49.8912	48.1895	43.866	41.9138	82.1093	22.1726	13.0467	0	33.2885	22.1905	25.1982	25.8429	30.8749	27.8325	50.0877	25.2894	0	28.5692	22.607	0	0	0	0	0	0	0	84.3688	100.863	151.896	93.7315	76.4931	56.2254	132.032	78.5148	83.7876	168.214
193.1/1.1 (10741)	193.097	1.12	10741	0	0	0	0	0	0	0	0	0	0	0	0	0	0	0	0	0	0	0	0	0	0	0	0	0	0	0	0	0	0	0	0	0	0	0	0	3.44421	0	0	2.9583	0	0	0	0	0	0
193.1/4.4 (10747)	193.132	4.36	10747	0	0	0	0	0	0	0	0	0	0	0	0	0	0	0	27.3641	61.0867	0	0	0	0	2.77414	5.24027	7.95046	0	0	0	0	0	0	0.547227	0	0	0	0	0	0	0	0	0	0	0	0	0	0	0
193.2/12.8 (10752)	193.156	12.8	10752	0	0	0	0	3.58454	0	0	5.98083	35.7981	0	0	0	31.6928	0	0	0	0	0	0	10.2239	0	0	34.2078	0	0	3.67864	0	1.22274	0	14.54	0	0	6.34235	0	4.8195	0	27.0093	7.50453	5.83194	0	0	0	38.7987	10.9774	0	0
193.2/11.5 (10757)	193.158	11.49	10757	157.833	102.907	126.051	64.3345	87.1868	68.1116	120.811	132.618	157.592	0	180.902	135.599	112.777	83.5853	87.3328	99.7815	92.9643	0	62.0338	78.4541	88.3234	47.8144	127.866	94.7099	84.5729	66.0416	86.6052	81.9113	58.7944	93.567	94.417	157.724	112.554	100.901	83.9151	93.7452	99.6566	97.5844	92.2149	102.7	95.1445	99.7943	169.276	140.617	114.717	90.6091
193.2/4.5 (10769)	193.168	4.49	10769	0	0	13.014	0	10.6402	5.55542	0	14.7783	19.0165	10.3805	11.2387	15.5618	17.8468	0	20.9935	20.2626	11.1831	0	0	0	12.1758	0	12.8777	18.2071	12.1216	0	0	13.3697	14.9643	0	0	0	0	0	0	0	0	0	0	0	0	0	0	0	0	0
193.2/4.3 (10770)	193.17	4.3	10770	0	2.85683	0	11.1883	0	3.92528	0	0	0	6.69269	8.6509	5.61849	5.20605	13.535	13.7327	0	0	4.04879	29.1944	0	0	5.96969	5.11716	2.39769	0	9.44754	19.1435	4.74238	9.91647	0	0	0	0	0	0	0	0	0	0	0	0	0	0	0	0	0
194.1/4.9 (10807)	194.08	4.91	10807	0	2.23046	2.55182	5.8283	0	0	0	0	0	0	392.701	290.381	0	281.684	0	0	0	0	323.849	97.5533	0	0	0	0	0	135.63	516.648	0	3.78191	0	0	0	0	12.4864	1.85755	1.56371	12.0749	13.3155	0	10.7035	7.37969	0	11.993	4.02906	0	0
194.1/5.0 (10808)	194.081	5.03	10808	41.6231	5.06115	3.30391	0	8.79927	5.15767	369.35	369.527	466.526	225.786	0	0	333.029	0	668.617	56.0743	40.2068	37.5628	0	0	213.709	231.277	230.032	223.944	251.162	0	0	46.6916	44.2167	24.7044	0	0	0	0	8.65256	6.29815	20.2102	17.3707	43.3384	17.0993	21.3168	50.1448	27.0606	16.6751	31.1115	45.892
194.1/4.8 (10810)	194.082	4.8	10810	0	0	0	0	1.08465	0	0	0	0	111.978	0	0	0	0	0	0	0	0	0	0	0	0	0	0	0	0	0	0	0	0	0	0	0	0	0	0	0	0	0	0	0	0	0	0	0	0
194.1/1.1 (10825)	194.115	1.12	10825	0	0	0	0	0	0	0	0	0	0	0	0	0	0	0	0	0	0	0	0	0	0	0	0	0	0	0	0	0	0	21.7351	28.6838	35.5242	0	31.4996	25.0495	9.37468	6.91448	13.8598	4.73434	8.80718	7.8166	0	9.38907	11.3927	0
194.1/1.1 (10845)	194.119	1.11	10845	0	0	0	0	0	0	0	0	0	0	0	0	0	0	0	0	0	0	0	0	0	0	0	0	0	0	0	0	0	0	0	0	0	20.8251	0	0	0	0	0	0	0.876254	1.64236	0	0	0.381581	0
195.0/1.0 (10860)	194.967	1.02	10860	2.78078	0	0	0	0	0	0	5.38274	23.132	0	38.2985	27.2363	28.5894	0	26.7946	0	0	0	9.02024	0	22.6294	21.0769	0	0	0	11.1472	26.6753	0	0	0	0	0	0	0	0	0	0	0	0	0	0	0	0	0	0	0
195.0/9.1 (10862)	195.016	9.15	10862	0	0	0	8.9759	76.4097	51.8057	46.8483	57.3663	63.8255	7.5467	64.3052	77.8957	54.9435	0	58.894	85.0395	0	78.7595	12.2753	0	78.0185	44.6181	77.5577	67.2126	74.9196	54.6093	87.2717	85.3619	53.729	34.7415	0	0	0	109.193	124.148	108.039	113.262	111.279	104.842	0	0	0	0	0	0	24.9361
195.0/9.2 (10863)	195.019	9.2	10863	0	0	0	0	0	0	0	0	0	14.4419	0	0	0	2.21874	0	0	0	0	0	0	0	0	0	0	0	0	0	0	0	8.55662	0	0	0	0	0	0	0	0	0	0	0	0	0	0	0	0
195.1/2.0 (10865)	195.072	2.05	10865	0	0	0	1.01361	0	0	0	3.43361	0	0	0	0	0	0	0	0	0	0	0	8.34045	0	0	0	0	0	0	0	0	0	0	0	0	0	0	0	0	0	0	0	0	0	0	0	0	0	0
195.1/1.1 (10866)	195.073	1.05	10866	0	0	10.1569	3.40417	0	0	18.9839	22.0839	23.9132	0	0	20.8074	0	0	15.1814	40.7738	0	0	0	0	0	0	0	38.8803	22.8404	0	30.3519	0	0	21.5614	0	0	0	0	0	0	0	0	1.71739	0	0	0	2.50214	0	0	0
195.1/1.1 (10870)	195.076	1.12	10870	130.674	106.611	125.867	140.076	115.781	0	190.846	186.958	214.425	146.384	210.775	185.724	171.362	176.394	208.352	150.488	192.698	0	83.2228	69.5283	46.3795	86.643	93.2329	43.567	69.6635	52.9274	65.7317	205.122	211.528	151.141	0	0	0	0	0	0	2.09696	1.06574	0	0	0	1.31149	0	0	0	0
195.1/1.6 (10871)	195.076	1.56	10871	379.312	173.411	0	228.167	0	184.659	0	144.806	0	1.79391	0	197.114	0	24.0106	299.23	0	0	108.403	0	48.9898	65.2286	68.7966	0	0	0	77.1995	110.389	255.827	0	0	0	0	0	0	0	0	0	0	0	0	0	0	0	0	0	0
195.1/1.7 (10872)	195.076	1.74	10872	0	0	232.972	0	203.296	0	191.33	12.3593	240.7	0	198.107	0	189.592	33.4896	0	292.61	261.611	0	105.828	0	0	0	97.2468	84.054	104.215	0	0	0	293.38	279.846	0	0	0	0	0	0	0	0	0	0	0	0	0	0	0	0
195.1/1.9 (10873)	195.076	1.94	10873	0	0	0	0	0	0	0	0	0	0	0	11.2503	0	0	15.949	0	0	0	1.29585	3.27263	5.18038	2.57965	0	0	0	18.7376	37.2408	0	0	0	0	0	0	0	0	0	0	0	0	0	0	0	0	0	0	0
195.1/5.3 (10881)	195.09	5.25	10881	0	0	0	0	0	0	0	0	0	0	0	0	0	0	0	0	0	0	0	0	0	0	0	0	0	0	0	0	0	0	0	0	0	0	0	0	19.0135	13.9778	7.92772	9.19527	4.64482	3.02716	3.01483	3.53453	0	0
195.1/7.9 (10883)	195.098	7.87	10883	52.903	45.4396	76.2616	1.12001	48.7718	51.9358	44.1721	0	0	0	61.1282	45.278	0	0	42.0564	50.7193	51.4564	0	33.6854	33.1202	42.8791	32.0834	66.367	0	0	37.6515	22.9871	0	56.393	59.2064	85.564	78.1439	82.8163	56.3569	48.9128	53.0639	1.74827	59.002	0	0	61.4862	0	0	0	0	63.4627
195.1/14.2 (10884)	195.101	14.21	10884	130.235	103.167	122.755	71.1612	83.398	0	97.6276	107.165	161.278	107.62	144.474	112.754	112.41	88.5848	102.403	112.683	97.4099	0	55.9047	100.407	117.375	62.7721	152.072	100.643	118.796	95.2384	29.2508	100.816	87.7175	88.996	81.0355	143.228	143.445	119.174	107.277	95.648	117.35	120.487	124.043	123.931	95.8135	105.695	135.152	152.151	124.163	121.625
195.1/1.2 (10892)	195.111	1.17	10892	21.731	0	15.3993	26.5193	0	0	0	34.2268	33.101	0	0	29.1244	32.1912	0	32.6279	29.1488	29.1679	0	28.7345	30.8929	36.0493	34.049	37.8565	28.1519	26.698	32.423	31.6398	19.7994	30.4242	0	0	0	0	0	0	0	0	0	0	0	0	0	0	0	0	0
195.1/3.3 (10896)	195.112	3.3	10896	86.2628	29.9935	0	27.3296	0	7.11863	32.4753	36.5423	61.003	0	37.8942	27.2424	24.8546	32.9469	88.9098	0	0	0	30.6788	0	0	0	0	7.11728	0	38.2724	87.9283	4.33828	0	0	0	0	0	0	0	0	0	0	0	0	0	0	0	0	0	0
195.2/13.7 (10910)	195.174	13.73	10910	16.3606	10.7407	0	0	6.80918	2.72247	0	8.51004	16.7718	4.78941	12.7674	16.865	9.1479	1.65176	6.56841	5.8777	9.80366	0	0	0	4.04489	2.02286	5.39944	0	12.5746	0	2.47288	0	5.93537	0	0	0	13.1328	9.45758	5.0683	8.02689	4.69021	3.53784	12.6157	6.55163	0	12.8116	11.1197	11.5939	11.795	4.77066
196.0/9.1 (10930)	196.035	9.09	10930	0	0	0	546.084	118.172	118.154	102.568	74.1572	59.7697	0	73.3116	83.1662	58.4144	37.5304	81.0816	122.304	86.2308	120.7	7.37274	84.7764	68.0457	79.4673	90.9758	91.3259	86.0134	59.4942	93.8837	107.233	110.104	88.8578	0	0	0	135.69	134.976	137.256	106.749	119.79	117.9	0	0	0	0	0	0	24.7318
196.1/3.0 (10955)	196.12	3.01	10955	0	0	0	0	0	0	33.4581	3.67527	39.171	0	22.824	41.1134	51.5331	89.1828	205.782	0	0	0	0	0	0	0	0	0	0	0	0	0	0	0	0	0	0	0	0	0	0	0	0	0	0	0	0	0	0	0
197.1/1.0 (10973)	197.086	1	10973	0	0	0	0	0	0	0	0	0	7.99006	12.7549	0	7.95703	0	0	0	0	0	0	0	0	0	0	0	0	0	0	0	0	0	0	0	0	0	0	0	0	0	0	0	0	0	0	0	0	0
197.1/2.8 (10976)	197.089	2.75	10976	3.507	0	0	0	0	0	0	0	0	0	0	0	1.97102	0	3.87502	0	0	0	2.28891	0	0	0	0	0	0	0	0	0	0	0	0	0	0	0	0	0	0	0	0.73806	0	0	0	0.707141	0	0	0
197.1/4.5 (10977)	197.089	4.51	10977	0	0	0	0	0	0	7.55957	0	7.58851	0	2.46271	0	0	1.63784	13.1432	3.76007	0	0	0	0	2.71519	0	8.82659	0	3.95527	0	0	0	0	0	0	0	0	0	0	0	0	0	0	0	0	0	0	0	0	0
197.1/1.9 (10978)	197.089	1.95	10978	0	0	0	0	0	0	0	0	0	0	0	0	0	0	0	0	0	0	0	0	0	0	0	4.28093	10.2843	2.06977	0	0	0	0	0	0	0	0	0	0	0	0	0	0	0	0	0	0	0	0
197.1/4.5 (10992)	197.125	4.46	10992	0	0	0	0	0	0	0	0	0	0	0	0	13.9503	0	0	0	0	0	11.7705	19.5327	0	0	0	0	0	20.3421	10.9207	0	0	0	0	0	0	0	0	0	0	0	0	0	0	0	0	0	0	0
197.1/5.1 (11003)	197.127	5.13	11003	244.852	88.494	88.3094	113.745	96.1935	0	85.1279	84.4353	96.504	0	74.4067	65.6541	107.843	97.7435	244.84	182.798	151.383	0	156.716	128.371	125.783	144.715	156.397	160.671	216.602	166.164	226.603	168.062	166.504	107.505	0	0	0	0	0	0	0	0	0	0	0	0	0	0	0	0
197.1/4.2 (11006)	197.128	4.18	11006	0	0	0	1795.12	1689.98	0	1923.19	1886.84	0	0	0	0	0	0	0	0	0	0	0	515.678	0	0	0	0	0	0	0	0	0	1752.73	0	0	0	0	0	0	0	0	0	0	23.0363	0	0	0	0	0
197.1/4.9 (11009)	197.128	4.85	11009	113.489	73.3035	33.8274	17.692	14.6638	39.214	142.465	82.3163	75.775	166.821	108.929	86.2019	145.256	103.9	288.436	74.5225	143.949	0	82.7647	129.073	83.5704	82.3338	109.156	173.073	87.7272	142.784	71.5946	140.249	100.65	57.9109	0	0	0	0	0	0	0	0	0	0	0	0	0	0	0	0
197.1/4.0 (11010)	197.128	4.04	11010	0	0	0	0	0	0	0	0	0	0	0	0	0	2039.51	0	0	0	0	992.392	0	0	0	0	0	0	619.218	1208.54	0	4.97012	0	0	0	0	0	0	0	10.9856	9.114	0	7.99638	4.75978	4.0404	17.5231	6.06702	0	0
197.1/4.3 (11011)	197.128	4.28	11011	3056.47	1855.63	1854.43	0	0	0	0	0	2448.3	0	2025.87	2014.01	1841.75	0	3299.87	2698.43	2126.3	0	0	0	752.644	1128.63	919.174	825.45	957.711	0	0	2373.56	3119.05	0	0	0	0	0	0	0	29.9251	31.8146	46.2733	16.5403	0	17.7511	39.4898	22.8268	39.7161	0
197.1/4.2 (11016)	197.13	4.17	11016	0	0	0	0	0	1630.43	0	0	0	1901.93	0	0	0	0	0	0	0	2083.91	0	0	0	0	0	0	0	0	0	0	0	0	0	0	0	0	0	0	0	0	0	0	0	0	0	0	0	0
197.1/2.0 (11019)	197.132	1.96	11019	0	2.66058	0	0	0	0	0	0	0	0	0	0	0	0	0	0	0	0	0	0	0	0	0.308813	0	0	0	0	1.52887	0	0	0	0	0	0	0	0	0	0	0	0	0	0	0	0	0	0
197.6/7.5 (11025)	197.586	7.52	11025	48.0669	39.4845	38.9462	274.381	41.196	38.8843	0	0	0	0	0	0	0	0	0	57.6317	50.2646	0	4.00552	2.58328	2.15604	5.52161	0	0	0	0	0	52.6169	59.867	39.0843	0	0	0	0	0	0	0	0	0	0	0	0	0	0	0	0
198.0/1.4 (11029)	198.023	1.41	11029	16.5603	0	7.98873	0	0	1.95578	0	0	0	0	0	3.50934	76.9613	0	0	0	0	0	18.4503	0	0	22.0364	0	14.2485	3.60589	1.18401	0	13.1386	23.6578	17.5527	0	0	0	0	0	0	0	0	0	0	0	0	0	0	0	0
198.1/2.1 (11041)	198.073	2.11	11041	0	6.7236	3.974	0	0	5.63843	0	0	1.60298	0	3.36432	0	0	0	0	0	2.07249	0	0	0	2.2519	0	0	6.38181	0	0	0	0	0	0	0	0	0	0	0	0	0	0	0	0	0	0	0	0	0	0
198.1/2.8 (11040)	198.073	2.82	11040	52.6919	0	0	0	0	0	0	0	0	0	0	0	0	0	3.87973	0	0	0	0	0	0	0	0	0	37.7494	0	52.3023	0	0	0	0	0	0	0	0	0	0	0	0	0	0	0	0	0	0	0
198.1/1.2 (11045)	198.076	1.17	11045	0	0	0	0	0	0	0	7.83408	0	0	0	0	0	0	0	0	0	0	395.551	409.358	396.887	588.736	498.301	478.896	0	337.683	0	0	0	0	0	0	0	0	0	0	0	0	1.62723	0	0	0	4.62161	0	0	0
198.1/1.1 (11048)	198.078	1.12	11048	0	0	11.535	0	0	0	0	0	30.17	0	0	0	0	0	25.2311	0	0	0	0	0	0	2.31313	0	21.0597	391.107	0	400.073	0	0	0	0	0	0	0	0	0	0	0	0	0	0	0	0	0	0	0
198.1/1.1 (11052)	198.087	1.14	11052	155.923	112.522	119.884	211.602	131.641	148.944	111.848	130.762	99.555	77.9558	91.67	100.468	78.7141	107.992	166.396	98.0126	90.4244	0	0	0	0	0	0	0	0	5.56241	0	99.695	126.079	110.657	0	0	0	0	0	0	0	0	0	0	0	0	0	0	0	0
198.2/7.8 (11065)	198.15	7.84	11065	0	0	0	0	0	0	31.5813	0	0	0	0	0	0	0	0	0	0	29.8352	0	0	0	0	0	0	0	0	0	0	0	0	0	0	0	0	0	0	0	0	0	0	0	0	0	0	0	0
198.2/10.1 (11066)	198.182	10.15	11066	0	0	0	0	0	0	0	0	0	0	0	0	0	0	0	0	0	0	0	0	3.98175	0	0	2.03073	0	0	0	0	0	0	0	0	0	0	0	0	0	0	0	0	0	10.404	0	0	0	0
198.2/9.4 (11067)	198.183	9.38	11067	0	0	19.1338	0	0	0	7.05328	0	0	0	0	0	8.90658	0	0	0	0	0	0	0	0	0	0	0	0	0	0	0	0	0	0	0	0	0	0	0	0	0	0	0	0	27.166	0	0	0	0
198.2/10.1 (11069)	198.184	10.11	11069	8.61246	9.74727	4.85128	0	2.22887	0	8.10183	21.2359	7.75266	0	21.7552	15.6994	2.6359	0	3.37065	2.3978	6.71049	0	0	0.670744	0	0	6.30705	0	0	0	0	4.45476	0	0	0	33.7166	12.3994	11.5717	5.9026	2.74429	7.52134	8.66016	10.2826	10.0851	7.71527	0	22.2633	14.6015	19.7659	7.72802
198.2/10.3 (11074)	198.22	10.27	11074	0	0	0	0	0	0	0	0	0	0	0	0	0	0	0	0	0	0	0	25.9846	54.2067	0	0	41.2346	0	0	0	0	0	0	0	0	0	0	0	0	0	0	0	0	0	0	0	0	0	0
198.2/10.2 (11075)	198.222	10.23	11075	0	0	0	0	0	0	0	0	0	0	0	0	0	0	0	0	0	0	44.5808	0	0	7.63732	27.0492	0	4.21805	24.6013	8.22804	0	0	0	0	0	0	0	0	0	0	0	0	0	0	0	0	0	0	0
199.1/4.0 (11087)	199.054	3.99	11087	0	0	0	0	0	0	0	0	0	0	0	0	0	0	0	0	0	0	0	0	0	40.59	26.4023	6.59841	0	0	0	0	0	0	0	0	0	0	0	0	1.35827	0	0	0	0	0	0	0	0.728489	0
199.1/3.9 (11088)	199.055	3.86	11088	0	0	0	0	0	0	6.04148	0	0	17.5184	0	0	0	0	0	0	0	9.18795	0	0	0	0	0	0	0	0	0	0	0	0	0	0	0	0	0	0	0	0	0	0	0	0	0	0	0	0
199.1/1.2 (11099)	199.087	1.16	11099	0	9.29936	0	0	0	0	0	0	0	0	0	0	0	0	5.36029	0	0	0	0	0	0	0	0	0	0	0	0	0	7.60301	0	0	0	0	0	0	0	0	0	0	0	0	0	0	0	0	0
199.1/4.8 (11105)	199.095	4.79	11105	0	0	0	0	0	0	0	0	0	0	0	0	0	0	0	0	0	0	0	0	0	0	0	0	0	0	0	0	0	0	0	0	0	0	0	0	1.77644	19.4782	57.3847	0	0	18.8211	0	0	0	0
199.1/6.3 (11107)	199.095	6.31	11107	0.648586	0	0	0	0	0	0	0	0	0	0	0	0	0	0	0	0	0	0	0	0	0	0	0	0	0	0	0	0	0	0	0	0	0	0	0	10.8815	17.043	104.176	1.56051	0	24.7163	1.21171	0	0	0
199.1/5.3 (11108)	199.096	5.35	11108	0	0	0	0	0	0	0	0	0	0	0	0	0	0	0	0	0	0	0	0	0	0	0	0	0	0	0	0	0	0	0	0	0	0	0	0	189.725	234.859	222.556	223.889	156.975	113.256	246.964	114.76	183.281	0
199.1/1.5 (11120)	199.108	1.48	11120	56.8528	3.40264	0	0	0	0	0	0	0	0	0	1.95378	0	0	0	0	0	0	0	0	0	0	0.592727	1.61069	0	0	0	0	30.2089	0	0	0	0	0	0	0	0	0	0	0	0	0	0	0	0	0
199.1/11.6 (11129)	199.112	11.63	11129	0	0	0	0	0	0	0	0	0	0	0	0	0	0	0	0	0	0	7.12715	36.2634	26.0735	40.0098	16.6868	22.0412	0	0	0	0	0	0	0	0	0	0	0	0	0	0	0	0	0	0	0	0	0	0
199.1/2.7 (11134)	199.143	2.67	11134	4.49342	0	0	0	0	0	3.92384	0	6.33109	5.92578	0	0	5.265	0	22.5252	0	0	0	0	0	0	0	0	0	0	0	0	0	0	0	0	0	0	0	0	0	0	0	0	0	0	0	0	0	0	0
199.1/1.9 (11135)	199.143	1.92	11135	0	0	19.2758	7.31011	11.5127	23.1871	0	0	0	0	0	0	0	0	1.77106	0	0	0	0	0	0	0	0	0	0	0	0	0	0	0	0	0	0	0	0	0	0	0	0	0	0	0	0	0	0	0
199.1/5.6 (11137)	199.143	5.56	11137	22.4881	9.31081	11.6948	0	10.3674	0	539.192	409.405	583.717	678.684	663.733	1403.33	1108.83	1379.96	1083.58	17.4101	14.0023	0	0	0	0	0	0	0	0	0	0	6.70676	18.4707	9.56073	0	0	0	0	0	0	1.00507	0	0	3.86588	0	0	21.7344	8.31128	1.42343	0
199.2/15.5 (11143)	199.168	15.46	11143	60.5015	36.5719	43.2422	0	31.1381	0	42.4329	41.271	32.4256	0	46.3978	35.0027	41.1677	34.7658	29.3078	26.5554	41.8726	0	19.9155	37.9944	32.9435	24.4092	42.0709	37.9379	26.1008	28.2476	23.3729	27.6296	22.062	42.6609	22.5076	51.6078	26.2457	46.9709	25.2616	39.3892	33.0033	44.1289	30.9478	41.1518	35.8276	37.5194	36.3625	45.8766	34.6475	33.9065
199.2/15.4 (11145)	199.169	15.35	11145	0	0	0	39.1154	0	32.7467	0	0	0	0	0	0	0	0	0	0	0	0	0	0	0	0	0	0	0	0	0	0	0	0	0	0	0	0	0	0	0	0	0	0	0	0	0	0	0	0
199.2/14.7 (11146)	199.169	14.65	11146	0	0	0	0	0	0	0	0	25.9874	0	0	0	0	0	23.032	0	0	0	13.3404	0	0	1.12706	0	8.48475	0.841158	0	0	2.29516	0	2.5173	1.25297	0	1.16164	2.50647	9.83407	5.31037	13.929	0	27.8497	0	0.042576	0	0	9.06775	0	31.7241
200.0/3.4 (11172)	200.033	3.36	11172	0	0	0	0	0	0	4.11168	18.0237	7.4587	5.99561	10.7391	4.16504	0	0	0	0	0	0	0	0	0	0	0	0	0	0	5.53276	0	0	0	0	0	0	0.840193	0	0	0	0	0	0	0.460627	0	0	0	1.16764	0
200.1/5.1 (11181)	200.089	5.14	11181	0	0	0	0	0	0	0	0	0	0	0	16.3417	160.406	0	0	0	0	0	12.4879	0	0	13.9696	0	0	0	0	0	0	0	0	0	0	0	0	0	0	0	0	0	0	0	0	0	0	0	0
200.1/2.2 (11182)	200.089	2.17	11182	0	0	0	0	0	0	0	0	0	0	0	0	0	0	0	0	0	0	0	15.2666	0	7.2701	0	0	0	0	64.3776	0	0	0	0	0	0	0	0	0	0	0	0	0	0	0	0	0	0	0
200.1/4.9 (11183)	200.09	4.95	11183	0	0	0	0	0	0	1114.95	979.026	841.167	0	880.442	587.725	670.065	569.253	1665.71	0	0	0	0	14.5806	19.4128	0	22.763	13.1004	23.5212	11.7828	9.1459	0	0	0	0	0	0	0	0	0	0	0	0	0	0	0	0	0	0	0
200.1/2.9 (11184)	200.09	2.87	11184	1.21714	0	0	0	0	0	30.7416	40.0116	39.7901	0	38.5544	22.181	27.3719	18.8681	36.8091	0	0	0	0	0	0	0	0	0	2.70386	0.546163	1.63271	0	0	0	0	0	0	0	0	0	0	0	0	0	0	0	0	0	0	0
200.1/4.6 (11185)	200.091	4.56	11185	0	0	0	0	0	0	0	334.007	203.44	0	336.042	268.038	300.442	0	0	0	0	0	2.29929	0	4.29862	0	0	0	5.77054	0	0	0	0	0	0	0	0	0	0	0	0	0	0	0	0	0	0	0	0	0
200.1/2.7 (11186)	200.091	2.71	11186	0	0	0	0	0	0	0	0	0	0	0	0	0	0	0	0	0	0	66.5541	0	0	0	43.0626	0	36.7056	0	0	0	0	0	0	0	0	0	0	0	0	0	0	0	0	0	0	0	0	0
200.1/4.4 (11188)	200.092	4.37	11188	0	0	0	0	0	0	1173.94	832.216	0	821.795	0	0	0	0	0	0	0	0	0	0	0	0	0	0	0	0	0	0	0	0	0	0	0	0	0	0	0	0	0	0	0	0	0	0	0	0
200.1/4.3 (11189)	200.093	4.26	11189	0	0	0	0	0	0	0	0	0	0	0	0	0	678.381	0	0	0	0	0	33.1619	0	0	0	0	0	37.4572	0	0	0	0	0	0	0	0	0	0	0	0	0	0	0	0	0	0	0	0
200.1/4.6 (11191)	200.093	4.58	11191	0	0	0	0	0	0	647.283	0	726.299	573.927	659.351	465.15	529.202	487.033	0	0	0	0	27.5923	0	22.4626	33.0206	17.8499	39.6901	21.5373	0	35.8346	0	0	0	0	0	0	0	0	0	0	0	0	0	0	0	0	0	0	0
200.1/1.0 (11200)	200.138	1.04	11200	69.6158	82.1831	73.7534	262.359	69.9918	85.4092	78.3873	50.5006	56.7059	73.649	45.7644	67.1396	68.9189	93.0091	76.8124	70.3455	77.251	0	98.3463	85.3179	86.9191	106.093	81.1444	79.7676	19.3945	87.4967	87.2469	76.6156	98.2671	89.9724	0	0	0	0	0	0	1.79585	1.72158	2.87393	0	0	0	3.48207	0	3.71074	0
200.2/8.8 (11204)	200.164	8.82	11204	87.9082	73.5538	68.765	28.3448	57.8951	35.9938	58.701	73.1281	90.5279	0	97.0502	74.9128	63.2226	24.8808	40.1875	66.7044	54.7359	0	21.8688	43.4977	54.22	19.625	88.9447	34.1586	53.1194	25.7115	29.1152	52.3585	27.7418	36.879	72.4592	77.6263	75.463	59.2106	56.2092	47.6859	61.2434	61.9299	62.5583	64.1787	55.1719	68.5836	58.4375	92.0058	64.7368	59.9652
200.2/13.7 (11206)	200.201	13.66	11206	101.042	84.572	54.228	37.3675	68.9824	0	77.0312	82.2106	93.3617	79.3174	101.447	83.6933	80.7045	57.8361	61.1523	69.1214	70.7587	0	21.9277	53.999	68.5168	14.3975	81.7441	59.6515	67.7655	36.6584	15.158	66.8528	59.2427	34.062	26.3185	97.3963	86.1596	100.399	70.0355	55.5433	79.6804	73.087	77.6956	81.1155	73.3398	82.453	88.01	107.128	91.5118	80.0276
200.2/12.3 (11209)	200.237	12.29	11209	139.018	67.7829	50.1636	32.154	42.1023	33.7662	70.339	101.793	79.2611	45.5459	118.762	101.055	44.4428	42.2198	39.6625	41.9028	37.7798	0	27.324	32.7075	38.6207	20.9756	49.7689	40.5823	40.8042	35.6012	26.5602	42.1617	32.2144	35.2826	38.4851	100.01	78.8169	85.4351	54.7158	52.7243	85.9358	77.728	64.1551	66.3585	79.8432	70.7118	94.3433	76.9902	95.6821	64.2182
201.1/3.8 (11220)	201.084	3.76	11220	0	0	1.17351	0	0	0	0	0	0	0	0	0	0	0	0	0	0	0	0	0	0	0	0	0	3.57878	0	0	0	0	0	0	0	0	0	0	0	0	0	0	4.87963	0	0	0	0	0	7.41203
201.1/3.6 (11228)	201.088	3.55	11228	0	0	0	0	0	0	0	0	6.12123	1.86156	0	0	0	0	0	12.9821	7.52737	0	0	0	0	7.84405	0	8.45676	0	0	0	5.22975	5.53164	0	0	0	0	0.785749	0	0	20.0639	0	0	23.4791	16.3022	0	0	3.09543	0	8.04465
201.1/6.0 (11239)	201.11	6.01	11239	0	0	0	0	0	0	0	0	0	0	0	0	0	0	0	0	0	0	0	0	0	0	0	0	0	0	0	0	0	0	0	0	0	0	0	0	0	0	6.14639	3.00585	0	31.258	0	0	0	0
201.1/4.5 (11240)	201.11	4.53	11240	0	0	0	0	0	0	0	0	0	0	0	0	0	0	0	0	0	0	0	0	0	0	0	0	0	0	0	0	0	0	0	0	0	0	0	0	6.85653	23.6499	57.3131	64.8814	0	140.791	0	0	0	0
201.1/2.7 (11249)	201.121	2.67	11249	105.694	32.4042	5.01561	0	0	0	0	0	0	0	0	15.4752	0	0	30.61	10.2075	0	0	0	4.54912	4.11421	0	3.70313	0	0	0	22.1731	0	13.9939	0	0	0	0	0	0	0	0	0	0	0	0	0	0	0	0	0
201.1/3.7 (11257)	201.122	3.75	11257	6.45931	31.295	4.62436	38.3259	0	0	56.978	52.0037	51.6943	28.488	58.9885	50.8733	10.8365	13.7065	155.893	61.1432	76.7133	0	106.695	0	11.5531	0	57.4843	52.9816	92.6328	34.7327	0	64.1249	59.3196	9.2783	0	0	0	0	0	0	0	0	0	0	0	0	0	0	0	0
201.1/3.9 (11259)	201.122	3.87	11259	0	0	0	0	0	0	0	0	0	0	0	0	0	0.926765	0	0	0	0	0	0	0	107.213	0	0	0	2.21972	0	0	64.1962	0	0	0	0	0	0	0	0	0	0	0	0	0	0	0	0	0
201.1/3.1 (11265)	201.123	3.11	11265	172.367	40.3766	0	0	0	0	78.2562	43.8394	61.0811	102.554	76.7694	80.7361	0	94.1387	291.454	143.127	0	0	52.6215	0	0	13.8234	39.6276	0	0	92.0189	91.2075	46.2706	74.3304	0	0	0	0	0	0	0	0	0	0	0	0	0	0	0	0	0
201.1/3.2 (11264)	201.123	3.22	11264	0	0	65.9296	14.3819	68.0115	0	0	0	0	0	0	0	0	0	0	0	88.1345	0	0	0	0	0	43.9834	0	0	0	0	76.9557	0	0	0	0	0	0	0	0	0	0	0	0	0	0	0	0	0	0
201.1/2.6 (11275)	201.125	2.58	11275	0	6.09102	0	0	0	0	0	0	3.19752	4.71489	0	11.9184	0	0	0	0	0	23.6679	0	0	0	0	0	3.07101	2.62305	0	0	0	0	3.78443	0	0	0	0	0	0	0	0	0	0	0	0	0	0	0	0
202.0/3.5 (11298)	202.031	3.53	11298	0	0	0	0	0	0	0	0	0	0	0	0	0	0	0	0	0	0	0	0	0	0	0	0	0	0	0	0	0	2.44502	0	0	0	0	0	0	19.1711	0	12.5239	0	7.05417	4.49205	0	0	0	4.94706
202.0/1.0 (11301)	202.038	1.04	11301	0	0	0	660.799	0	0	0	0	0	0	0	0	0	0	0	0	0	0	5.01057	0	0	12.0789	0	0	0	0	0	0	82.0174	80.6896	0	0	0	0	0	0	0	0	0	0	0	0	0	0	0	0
202.0/3.8 (11302)	202.042	3.83	11302	0	0	0	0	0	0	0	8.16284	0	0	0	11.2067	6.89288	0	2.02753	0	5.16457	0	0	0	8.66074	0	0	6.1093	5.88151	0	9.20354	0	0.355176	0	0	0	0	0	10.7972	5.17999	9.41824	0	14.6546	0	12.0503	9.96424	19.0731	1.13004	16.6462	13.8828
202.0/4.4 (11306)	202.049	4.42	11306	0	0	0	0	0	0	0	0	0	0	0	0	0	0	0	0	0	0	0	0	1.11873	0	0	0	0	0	0	0	8.28099	0	0	0	0	0	0	0	0	0	0	0	0	0	0	0	0	0
202.1/1.1 (11309)	202.073	1.06	11309	0	0	0	0	0	0	0	0	0	23.4293	0	0	0	0	0	0	0	110.638	0	0	0	0	0	6.6605	0	0	0	0	0	0	0	0	0	0	0	0	0	0	0	0	0	0	0	0	0	0
202.1/4.8 (11310)	202.082	4.77	11310	0	0	0	0	0	0	0	4.04863	11.2416	0	0	0	0	0	25.9198	0	0	0	0	2.03736	1.67891	2.09737	0	0	13.8824	0	0	0	0	0	0	0	0	0	0	0	57.9166	61.2535	68.3632	6.28087	0	8.24335	26.6487	16.3794	26.5618	0
202.1/4.3 (11313)	202.083	4.28	11313	0	0	0	0	0	0	0	4.96574	3.55832	0	0	0	0	2.2052	10.5549	17.7372	38.2719	0	0	0	0	0	0	0	0	0	0	0	0	0	0	0	0	0	0	0	0	0	0	0	0	0	0	0	0	0
202.1/4.1 (11314)	202.085	4.15	11314	0	0	0	0	0	0	3.94728	2.6932	1.99764	2.12045	8.9735	12.9204	2.88831	1.56915	0	0	0	14.4097	0	0	0	0	0	0	0	0	0	0	0	0	0	0	0	0	0	0	0	0	0	0	0	0	0	0	0	0
202.1/3.0 (11327)	202.107	2.96	11327	57.1118	59.4371	0	0	0	21.8959	117.741	108.729	132.808	131.256	106.549	111.674	145.73	59.2107	171.105	49.8241	5.73693	0	13.1382	0	0	0	0	0	3.51922	13.3976	1.33966	0	0	0	0	0	0	0	0	0	4.02378	9.85942	1.14547	0	0	0	0	0	0	0
202.1/1.5 (11334)	202.108	1.55	11334	0	0	4.44206	0	0	5.94507	5.02145	0	0	0	0	0	4.40272	0	0	0	0	0	0	0	0	0	0	0	0	0	0	0	0	0	0	0	0	0	0	0	0	0	0	0	0	0	0	0	0	0
202.1/2.7 (11336)	202.11	2.69	11336	0	0	0	0	0	0	0	0	0	3.6945	0	0	0	0	0	0	0	7.36842	4.10431	0	0	0	0	0	0	0	0	0	0	0	0	0	0	0	0	0	0	0	0	0	0	0	0	0	0	0
202.1/1.1 (11339)	202.117	1.11	11339	0	0	0	0	0	0	4.65245	0	0	0	0	0	0	0	0	0	0	0	0	0	0	0	0	0	0	0	0	0	0	0	0	0	0	0	0	0	0	0	0	236.311	167.78	185.818	157.188	86.9358	151.673	2.9433
202.9/1.5 (11359)	202.95	1.47	11359	0	0	0	0	0	0	0	0	8.41995	0	0	0	0	0	0	0	0	0	0	3.89158	0	0	0	0	0	1.98321	0	0	0	0	0	0	0	0	0	0	0	0	0	0	0	0	0	0	0	0
203.0/2.9 (11376)	202.995	2.87	11376	0	0	0	0	0	0	0	0	0	0	0	0	2.04257	0	0	0	0	0	1.7298	0	0	0	0	0	7.54067	0	0	0	0	0	0	0	0	0	0	0	0	0	0	0	0	0	0	0	0	0
203.0/3.4 (11385)	202.999	3.4	11385	0	0	0	0	0	0	1.08938	2.70129	0	0	0.633593	8.88444	0	0	0	0	0	0	0	0	0	0	0	0	0	2.29199	3.36306	0	0	0	0	0	0	0	0	0	0	0	0	0	0	0	0	0	0	0
203.1/3.4 (11393)	203.078	3.44	11393	0	0	0	0	0	0	0	0	0	0	0	0	0	0	0	0	0	0	0	0	0	0	0	0	0	0	0	0	0	0	0	0	0	0	0	0	0	0	31.1012	0	1.96386	0	0	0	0	0
203.1/3.6 (11394)	203.079	3.55	11394	0	0	0	0	0	0	0	0	6.56811	0	0	23.1146	0	0	0	0	42.2092	0	0	0	36.0901	0	18.0527	0	23.6246	0	0	0	0	46.9763	0	0	0	0	0	6.35992	61.3897	0	0	42.6773	31.8902	44.3681	0	49.4334	63.1513	0
203.1/1.2 (11400)	203.08	1.18	11400	43.0703	25.5664	31.9035	45.9404	1.75689	34.1453	101.942	86.5235	84.6832	65.0584	110.781	105.091	82.3436	71.2652	124.962	51.3895	55.619	44.9778	68.4386	66.5943	60.594	90.3254	87.1557	72.1987	89.6376	67.3883	129.931	50.7049	69.8495	50.3089	0	0	0	0	0	0	0	1.18093	0	0	0	0	0	0	0	0
203.1/1.8 (11403)	203.081	1.83	11403	0	106.798	178.778	294.778	111.012	120.871	143.397	125.509	228.969	233.662	220.228	177.745	184.803	269.681	217.74	189.679	201.041	0	426.138	160.529	160.969	401.931	214.505	221.828	258.184	259.011	418.624	201.085	229.364	221.179	0	0	0	0	0	0	0	0	0	0	0	0	0	0	0	0
203.1/4.4 (11418)	203.104	4.37	11418	0	0	0	6.06399	0	0	0	0	0	0	0	0	1.70934	0	0	0	0	0	0	0	0	0	0	0	0	0	0	0	0	3.90279	0	0	0	0	0	0	0	0	0	0	0	0	0	0	0	0
203.1/2.9 (11419)	203.104	2.93	11419	0.887157	0	0	0	0	0	0	0	0	0	0	0	0	0	0	3.38305	0	0	0	0	0	0	0	0	0	1.17363	0	2.32879	0	0	0	0	0	0	0	0	0	0	0	0	0	0	0	0	0	0
203.1/1.2 (11437)	203.135	1.15	11437	0	0	0	0	0	0	0	0	0	0	0	0	0	0	0	0	0	0	0	0	14.1218	0	13.6248	0	0	0	0	0	0	0	0	0	0	0	0	0	7.46989	0	0	0	0	0	6.51915	0	0	0
203.1/2.1 (11441)	203.137	2.06	11441	0	58.9281	64.508	0	140.9	98.5264	0	0	0	0	11.2034	0	24.2793	24.4494	0	12.9475	0	0	0	0	0	2.78212	0	0	0	0	0	17.2891	0	0	0	0	0	0	0	0	0	0	0	0	0	0	0	0	0	0
203.1/1.8 (11442)	203.138	1.84	11442	72.0242	233.077	489.732	683.839	187.515	309.596	1.97425	0	17.3505	0	0	12.6296	0	0	30.7165	241.82	190.52	0	86.2661	0	32.1954	45.3486	16.7957	0	0	0	5.69243	424.431	650.694	0	0	0	0	0	0	0	0	0	0	0	0	0	0	0.177568	0	0
203.1/1.7 (11444)	203.138	1.67	11444	568.365	14.801	0	0	0	0	0	0	0	0	0	2.91754	5.9927	4.71132	4.42417	0	0	0	0	17.4921	6.52498	0	0	0	0	0	0	0	0	0	0	0	0	0	0	0	0	0	0	0	0	0	0	0	0	0
203.1/2.7 (11443)	203.138	2.75	11443	216.825	0	174	700.823	192.574	174.722	0	0	0	0	0	0	0	0	0	76.4012	0	0	10.9707	0	11.611	0	0	0	0	0	0	39.3333	0	207.288	0	0	0	0	0	0	0	0	0	0	0	0	0.916505	0	0	0
203.1/3.1 (11445)	203.138	3.12	11445	0	0	699.696	0	0	0	0	0	0	0	0	0	0	0	0	0	85.9829	0	0	0	76.7376	0	9.38116	0	0	0	0	638.591	897.367	0	0	0	0	0	0	0	0	0	0	0	0	0	0	0	0	0
203.1/3.0 (11446)	203.138	3.02	11446	1026.34	805.846	0	0	653.303	644.896	46.5393	19.7204	27.9933	52.4921	34.3007	57.2714	67.2962	114.404	100.342	158.283	65.7733	112.438	74.6096	37.5641	0	0	4.23141	4.52902	0	17.5501	15.2736	208.182	0	445.344	0	0	0	0	0	0	5.13405	11.4748	2.49398	10.7957	11.0312	19.2547	26.3477	16.1271	9.5886	0
203.1/1.2 (11452)	203.14	1.17	11452	450.085	388.252	553.24	0	603.382	0	0	0	0	0	0	18.5434	14.1278	19.1948	20.3156	167.805	123.814	156.002	56.0664	16.2834	0	39.0181	22.808	0	0	0	0	422.364	404.396	836.664	0	0	0	0	0	0	0	5.17049	3.00606	0	0	0	0	0	0	0
203.1/1.8 (11453)	203.141	1.77	11453	0	0	0	0	0	0	5.69744	0	0.220325	5.54	0	0	0	36.8445	0	8.37443	3.05456	83.8279	0	0	0	0	0	0	0	0	0	0	0	0	0	0	0	0	0	0	0	0	0	0	0	0	0	0	0	0
203.1/2.7 (11454)	203.141	2.68	11454	0	132.553	0	0	0	0	0	0	0	0	0	0	0	0	0	0	0	40.3503	0	0	0	0	0	0	0	0	0	0	0	0	0	0	0	0	0	0	0	0	0	0	0	0	0.701015	0	0	0
203.1/1.0 (11458)	203.15	1	11458	61.1874	120.11	106.108	90.4911	118.058	0	541.183	484.012	530.755	500.828	461.455	560.933	444.309	592.75	587.01	138.566	110.586	0	228.852	296.971	353.876	280.219	268.802	358.582	402.838	391.195	348.638	125.392	121.701	0	0	0	0	0	0	0	0	0	0	0	0	0	0	0	0	0
204.0/1.2 (11465)	203.999	1.25	11465	0	0	0	0	0	0	0	0	0	26.1022	0	0	8.74698	9.26479	0	0	0	0	0	0	0	0	0	0	0	0	0	0	0	0	0	0	0	0	0	0	0	0	0	0	0	0	0	0	0	0
204.0/1.0 (11468)	204.016	1	11468	0	0	0	49.5958	0	0	0	0	0	0	0	0	0	0	0	0	0	0	0	0	0	0	0	0	0	0	0	7.29038	24.5111	0	0	0	0	0	0	0	0	0	0	0	0	0	0	0	0	0
204.0/2.6 (11471)	204.03	2.6	11471	0	0	0	0	0	2.62889	0	0	0	0	0	0	0	0	1.77614	0	16.5038	0	0	0	28.9103	0	7.70388	15.5592	3.72134	0	17.8829	2.01548	0	0	0	0	0	0	0	0	0	0	0	0	0	0	0	0	0	0
204.0/2.7 (11477)	204.033	2.7	11477	0	0	0	0	0.0917495	0	0	0	0	3.00779	0	0	0	0	0	0	0	1.7656	60.6196	0	0	0	0	0	0	0	0	33.2756	0	0	0	0	0	0	0	0	0	0	0	0	0	0	0	0	0	0
204.1/1.4 (11484)	204.062	1.39	11484	0	76.0019	89.2968	0	52.941	69.1294	129.648	120.58	69.3189	0	128.952	47.5587	25.1364	0	35.6468	77.1854	111.604	0	31.2519	25.8438	38.0825	0	0	95.4841	86.6248	57.6989	70.5858	118.042	0	63.8795	0	0	0	0	0	0	0	0	0	0	0	0	0	0	0	0
204.1/11.1 (11497)	204.087	11.07	11497	0	0	1.07159	0	0	0	0	0	0	0	0	0	0	0	0	0	0	0	2.56716	0	0	0	0.653439	0	0	4.73783	0	0	0	0	2.99753	0	0	0	0	0	0	0	0	0	0	0	0	0	0	0
204.1/4.5 (11506)	204.121	4.5	11506	0	0	14.7869	0	0	0	0	14.2557	0	0	0	0	0	0	0	0	3.89152	0	0	0	0	0	13.2609	18.3719	0	0	0	20.9697	0	5.82192	0	0	0	0	0	0	0	0	0	0	0	0	0	0	0	0
204.1/1.1 (11509)	204.123	1.09	11509	404.482	504.947	601.446	0	611.344	586.561	0	0	0	0	0	0	217.738	0	0	607.15	644.132	0	0	0	0	0	0	0	0	0	0	566.573	578.885	625.171	0	0	0	0	0	0	33.9192	57.1377	78.423	24.6168	27.2845	37.3713	75.2091	30.7231	53.7161	0
204.1/3.8 (11513)	204.124	3.83	11513	0	0	0	0	0	0	0	0	0	0	0	0	0	2.59482	0	0	0	4.63235	0	0	0	0	0	0	0	2.59039	0	0	0	0	0	0	0	0	0	0	0	0	0	0	0	0	0	0	0	0
204.1/1.1 (11515)	204.125	1.09	11515	0	0	0	400.542	0	0	265.228	256.875	258.04	147.847	249.186	202.488	0	257.665	285.086	0	0	505.752	195.264	126.122	0	197.667	195.902	0	0	125.731	0	0	0	0	0	0	0	0	0	0	0	0	0	0	0	0	0	0	0	0
204.1/1.1 (11516)	204.128	1.14	11516	0	0	0	0	0	0	0	0	0	0	0	0	0	0	0	0	0	0	0	0	123.26	0	0	175.009	0	0	115.49	0	0	0	0	0	0	0	0	0	0	0	0	0	0	0	0	0	0	0
205.0/6.5 (11549)	205.049	6.47	11549	0	0	0	0	0	0	10.4006	8.55427	1.94188	0	0	6.59732	0	0	23.86	0	0	0	0	0	0	0	0	0	0	0	0	0	0	0	0	0	0	0	0	0	0	0	0	0	0	0	0	0	0	0
205.1/14.3 (11566)	205.085	14.3	11566	138.741	100.258	107.75	78.1409	78.6846	0	0	106.434	99.3122	0	110.361	99.9377	104.648	0	58.102	52.5375	84.7947	0	47.1365	93.0338	88.522	53.1331	103.679	95.8892	86.1759	82.453	46.7857	58.4171	31.6637	89.1156	40.1954	106.846	75.609	94.5111	58.5924	83.7421	90.8451	90.7622	78.6228	103.607	93.4414	88.5007	96.9996	112.65	85.7383	69.5378
205.1/14.2 (11568)	205.088	14.24	11568	0	0	0	0	0	80.225	97.9276	0	0	99.3233	0	0	0	100.764	0	0	0	87.9591	0	0	0	0	0	0	0	0	0	0	0	0.630774	0	0	0	0	0	0	0	0	0	0	0	0	0	0	0	0
205.1/2.2 (11575)	205.096	2.24	11575	0	0	44.9273	0	1236.78	0	0	0	0	0	0	0	0	0	0	0	0	0	0	0	0	0	0	0	0	0	0	0	0	1529.08	0	0	0	0	0	0	0	0	0	0	0	0	0	0	0	0
205.1/2.5 (11573)	205.096	2.5	11573	0	4049	180.296	7930.53	981.262	0	3416.72	2854.16	0	0	3337.24	3115.48	0	0	0	0	1.47044	0	0	1004.59	0	0	0	199.963	0	50.2085	0	0	0	826.793	0	0	0	0	0	0	0	0	0	0	0	0	0	0	0	0
205.1/2.9 (11574)	205.096	2.88	11574	0	0	4552.99	0	0	0	0	0	3833.47	0	0	0	0	0	0	0	8021.71	0	0	0	6225.75	0	0	6397.25	0	0	0	0	0	0	0	0	0	0	0	0	0	0	0	0	0	0	0	0	0	0
205.1/3.9 (11576)	205.096	3.93	11576	0	0	0	0	0	16.4452	0	0	0	16.1029	0	0	0	0	3.74951	0	0	0	0	26.582	0	0	0	0	0	4.73375	165.633	0	0	0	0	0	0	0	0	0	0	0	0	0	0	0	2.10364	0	0	0
205.1/4.0 (11577)	205.096	4.04	11577	0	66.1107	0	14.7674	39.289	0	121.488	113.331	0	52.8183	128.026	111.723	104.03	108.297	0	0	0	0	0	24.2314	0	0	0	0	0	68.3937	0	0	0	14.9456	0	0	0	0	0	0	0	0.749066	0	0	0	0	0	0	0	0
205.1/3.1 (11578)	205.096	3.08	11578	0	0	0	15926.9	71.5049	0	22.9948	0	0	0	21.9619	0	0	0	1.58135	8197.44	0	0	10097	132.027	0	0	7071.45	0	7766.84	0	11493.1	9103.41	9.94494	0	0	0	0	0	0	0	0	0	0	0	0	0	0	0	0	0
205.1/4.2 (11580)	205.097	4.19	11580	125.691	0	65.2258	0	12.0856	0	0	0	157.371	0	0	0	0	0	185.533	137.288	109.842	0	156.248	0	125.353	175.834	144.221	125.964	161.49	0	0	101.955	149.905	26.3512	0	0	0	0	0	0	0	0	0	0	0	0	0	0	0.926131	0
205.1/3.2 (11581)	205.097	3.23	11581	32213.8	12133.4	0	0	0	13733	7940.76	7818.1	8521.03	8764.48	9047.59	7612.56	8865.03	9166.55	17350.8	12499.7	0	0	10318	9542.83	0	12780.5	0	0	0	13195.3	7901.95	0	0	0	0	0	0	0	0	0	0	0	0	0	0	0	0	0	0	0
205.1/3.3 (11582)	205.097	3.35	11582	0	0	11928	0	12945.5	0	0	0	0	0	0	0	0	0	0	0	14941.5	0	0	0	10507.5	0	12430.5	13534.9	10759.1	0	0	14496.2	25481	15360.9	0	0	0	0	0	0	0	0	0	0	0	0	0	0	0	0
205.1/2.4 (11585)	205.099	2.36	11585	0	0	11.554	0	81.9837	0	0	0	0	0	0	0	0	0	0	0	0	3773.97	0	0	0	0	0	0	0	0	0	0	0	23.838	0	0	0	0	0	0	0	0	0	0	0	0	0	0	0	0
205.1/3.5 (11588)	205.117	3.5	11588	0	0	0	0	0	0	0	1.3119	20.8257	0	0	20.5146	15.1042	23.3126	23.456	114.258	71.7195	54.2661	24.6115	34.7431	0	0	0	35.1646	60.4595	34.6366	57.582	78.1343	58.9774	57.9178	0	0	0	21.1812	10.5159	18.5353	148.819	142.221	86.0127	103.492	94.4184	101.545	147.858	98.6387	99.2529	104.697
205.1/1.5 (11591)	205.118	1.45	11591	67.1107	28.81	53.3322	0	33.6069	36.1521	0	0	0	0	0	0	0	0	0	34.4485	38.3913	14.1814	0	3.89087	0	1.16026	3.97357	0	0	1.15975	0	93.1806	27.8462	44.7267	0	0	0	0	0	0	0	0	0	0	0	0	0	0	0	0
205.1/1.1 (11592)	205.118	1.07	11592	279.923	234.985	297.7	249.661	251.771	417.895	0	0	0	0	0	0	0	10.4478	0	147.119	129.021	0	15.6755	0	31.8038	0	0	0	0	0	0	421.87	342.365	399.051	0	0	0	0	0	0	3.67175	0	0	0	0	0	0	0	0	0
206.0/2.2 (11606)	205.975	2.15	11606	0	0	0	0	0	0	0	3.38589	0	0	3.79041	36.4108	0	0	14.4838	0	0	0	0	0	0	0	0	0	0	0	0	0	0	0	0	0	0	0	0	0	0	0	0	0	0	0	0	0	0	0
206.0/1.2 (11609)	205.983	1.19	11609	0	0	0	0	0	0	163.103	111.845	159.593	71.6226	104.43	126.877	151.189	260.035	0	0	0	0	0	0	0	0	0	0	0	0	0	0	0	0	0	0	0	0	0	0	0	0	0	0	0	0	0	0	0	0
206.1/6.0 (11618)	206.081	6.04	11618	28.7637	14.5562	8.56629	0	0	6.5098	29.7424	29.1683	32.2138	19.3089	28.7996	43.3611	32.4054	44.0727	53.4182	22.2763	18.351	8.07686	27.0382	12.0508	17.8585	28.3455	20.0016	20.3539	15.5461	11.1746	35.3189	12.506	21.4134	0	0	0	0	0	0	0	0	0	0	0	0	0	0	0	0	0
206.6/7.5 (11643)	206.591	7.51	11643	12.1406	2.2022	3.58871	47.8535	1.94348	0	0	0	0	0	0	0	0	0	0	6.31967	0	0	0	0	0	0	0	0	0	0	0	3.96083	9.41652	0.808393	0	0	0	0	0	0	0	0	0	0	0	0	0	0	0	0
207.1/3.4 (11659)	207.077	3.44	11659	0	0	0	0	0	0	14.6815	5.26195	9.16934	0	0	5.58258	22.5986	24.1495	0	0	0	0	0	0	0	0	0	0	0	0	0	0	0	0	0	0	0	0	0	0	0	0	0	0	0	0	0	0	0	0
207.1/3.1 (11671)	207.102	3.08	11671	0	8.21971	0	265.072	6.16903	0	5.03722	1.62195	0	6.41178	0	0	0	0	0	111.292	0	0	128.518	4.04547	0	0	88.2026	0	102.698	0	147.531	93.1788	0	0	0	0	0	0	0	0	0	0	0	0	0	0	0	0	0	0
207.1/3.3 (11672)	207.102	3.25	11672	549.593	156.151	163.7	0	179.931	186.459	97.8752	91.506	120.761	111.616	111.896	74.95	120.087	75.6987	247.302	187.68	179.735	145.523	166.001	117.757	140.591	167.676	199.454	176.81	173.144	195.141	141.72	257.638	424.842	219.365	0	0	0	0	0	0	0	0	0	0	0	0	0	0	0	0
207.1/6.0 (11680)	207.112	5.96	11680	0	0	0	0	0	0	0	0	0	0	0	0	0	0	0	0	0	0	0	0	3.87032	8.92986	0	2.10969	0	0	0	0	0	0	0	0	0	0	0	0	0	0	0	0	0	0	0	0	0	0
207.1/4.7 (11681)	207.113	4.66	11681	0	0	0	0	0	0	0	0	0	0	0	0	0	0	0	0	0	0	141.117	306.639	310.014	290.812	142.784	206.758	6.441	80.0953	12.2136	0	0	0	0	0	0	0	0	0	0	0	0	0	0	0	0	0	0	0
207.5/9.1 (11692)	207.543	9.12	11692	0	0	0	934.099	173.45	155.04	136.156	133.161	128.263	0	133.912	161.707	110.217	65.2528	128.205	197.816	160.992	0	24.5337	166.931	178.32	107.123	167.775	175.17	178.6	126.143	113.136	185.115	147.197	132.609	0	0	0	222.498	204.563	212.62	184.822	176.402	198.651	0	0	0	0	0	0	41.8506
208.0/1.2 (11697)	208.007	1.15	11697	0	0	10.0224	0	2.06251	0	3.86849	0	28.8777	0	0	12.363	118.582	0	0	0	0	6.23027	18.7962	0	0	0	0	0	6.29543	0	0	0	7.2268	0	0	0	0	0	0	0	0	0	0	0	0	0	0	0	0	0
208.1/5.8 (11707)	208.094	5.81	11707	15.8918	0	0	0	0	0	0	32.3185	0	0	0	0	4.34996	0	0	0	0.744339	0	0	12.6069	0	0	0	0	0	8.22502	28.1595	0	0	0	0	0	0	0	0	0	0	0	0	0	0	0	0	0	0	0
208.1/6.0 (11710)	208.096	5.98	11710	0	10.1179	3.50482	0	2.10166	0	18.4936	0	40.3603	21.817	27.8671	37.9192	27.6938	34.8571	70.1507	22.7843	0	0	22.5117	0	20.2234	31.5403	24.894	17.1223	27.2533	0	0	12.121	14.0662	0	0	0	0	0	0	0	0	0	0	0	0	0	0	0	0	0
208.1/12.1 (11715)	208.117	12.12	11715	15.8845	22.8357	15.0053	37.4738	23.5913	15.1379	0	0	0	0	0	0	0	0	0	21.199	11.8557	0	0	0	0	0	0	0	0	0	0	23.3639	30.6652	18.9759	0	0	0	0	0	0	0	0	0	0	0	0	0	0	0	0
209.1/1.1 (11745)	209.055	1.13	11745	5.41219	0	0	0	0	0	0	0	0	0	0	0	3.68863	0	6.00929	0	0	0	5.49745	4.44609	11.2308	15.853	5.83864	13.1803	5.62629	13.0908	5.75206	0	12.9907	0	0	0	0	0	0	0	0	0	0	0	0	0	1.80032	0	0	0
209.1/8.6 (11746)	209.057	8.64	11746	0	0	0	0	0	0	0	0	9.99454	0	0	0	3.56332	0	7.77249	0	0	0	0	0	0	0	0	0	0	0	0	0	0	0	0	0	0	0	0	0	14.9461	0	21.6516	8.68472	0	15.7634	0	0	0	0
209.1/7.9 (11749)	209.078	7.92	11749	0	0	0	0	0	0	0	0	0	0	0	0	0	0	0	0	0	0	8.50384	31.742	0	45.6116	0	0	0	4.37858	1.18538	0	0	0	0	0	0	0	0	0	0	0	0	0	0	0	0	0	0	0
209.1/2.4 (11755)	209.091	2.45	11755	0	0	0	100.277	6.64396	0	0	0	0	89.0463	0	0	215.142	0	0	84.2298	0	0	0	0	0	4.33869	5.0421	5.63515	0	0	0	0	0	75.1957	0	0	0	0	0	0	0	0	0	0	0	0	0	0	0	0
209.1/1.6 (11756)	209.091	1.59	11756	37.8444	0	0	0	0	0	0	0	0	0	0	0	0	0	192.174	0	0	0	0	0	0	0	0	3.49419	0	0	16.6483	0	74.4686	0	0	0	0	0	0	0	0	0	0	0	0	0	0	0	0	0
209.1/2.8 (11758)	209.091	2.79	11758	163.51	123.418	0	0	0	84.2497	138.741	137.301	83.436	101.412	129.314	119.14	148.775	81.7444	209.936	33.647	0	0	67.6484	0	0	0	0	0	0	76.2809	117.834	30.6854	19.7349	0	0	0	0	0	0	0	0	0	0	0	0	0	0	0	0	0
209.1/2.3 (11761)	209.092	2.33	11761	0	1.17888	0	168.49	0	26.108	278.292	269.912	284.353	0	290.065	0	5.92822	0	77.6175	5.45917	0	0	0	0	0	0	0	0	0	38.1233	3.45606	0	0	0	0	0	0	0	0	0	0	0	0	0	0	0	0	0	0	0
209.1/2.2 (11762)	209.093	2.23	11762	0	46.3651	0	0	0	0	0	0	0	0	0	123.806	0	6.80929	0	0	0	0	0	0	0	0	0	0	0	0	0	0	0	0	0	0	0	0	0	0	0	0	0	0	0	0	0	0	0	0
209.1/1.1 (11763)	209.094	1.13	11763	0	0	0	98.9171	0	0	0	0	0	90.382	0	0	0	0	0	0	0	63.1598	0	0	0	0	0	0	0	0	0	0	0	0	0	0	0	0	0	0	0	0	0	0	0	0	0	0	0	0
209.1/5.5 (11775)	209.115	5.47	11775	0	0	0	0	0	0	0	0	0	0	0	0	0	0	0	0	0	0	0	0	0	0	0	0	0	0	0	0	0	0	0	0	0	0	0	0	0	36.6925	43.6324	0	0	37.5887	0	0	0	0.421564
209.1/5.2 (11776)	209.117	5.18	11776	38.7724	0	0	0	0	12.9114	0	0	0	0	0	0	0	57.7924	0	0	0	4.83119	57.8024	0	0	0	0	2.75151	0	0	158.216	0	36.0579	0	0	0	0	0	0	0	0	0	3.0469	0	0	0	0.735957	0	0	0
209.1/4.8 (11780)	209.117	4.77	11780	13.8751	0	0	0	0	0	0	0	0	0	0	41.5855	3.73858	0	27.7559	17.169	7.58066	6.50375	0	0	0	19.0408	5.04143	7.8985	4.44082	0	0	0	8.55342	0	0	0.875379	0	0	0	0	15.5865	78.415	58.318	0	0	6.56894	0	0	0	0
209.1/4.5 (11782)	209.117	4.55	11782	0	5.35009	0	0	0	0	2.81316	0	0	3.41559	0	0	0	14.888	0	0	0	2.60392	0	0	0	0	0	0	0	0	0	0	0	0	0	0	0	0	0	0	0	0	0	0	0	0	0	0	0	0
209.1/6.6 (11781)	209.117	6.62	11781	0	0	0	0	0	0	0	0	0	0	0	0	0	0	0	0	0	0	0	0	0	0	0	0	0	0	0	0	0	0	0	0	0	0	0	0	0	33.5536	0	36.9675	26.7158	0	0	0	0	0
209.1/14.4 (11783)	209.118	14.35	11783	1.42802	0	0	0	0	0	0	0	0	0	0	0	0	0	0	0	0	0	0	0	0	0	0	0	0	0	0	0	0	0	0	1.1073	0	0	0	1.80778	0	0	0	0	0	0	0	0	0	0
209.1/1.5 (11786)	209.125	1.5	11786	0	22.5224	62.4583	0	7.98177	0	0	21.0247	0	0	0	0	29.4256	0	0	0	59.614	0	0	0	25.0876	0	0	56.0242	48.6228	32.1555	99.9614	0	91.3115	0	0	0	0	0	0	0	0	0	0	0	0	0	0	0	0	0
209.1/1.4 (11787)	209.126	1.4	11787	80.8803	0	0	0	0	0	0	0	25.1405	0	0	0	0	0	67.7175	0	0	0	3.59429	20.0175	0	0	0	0	0	0	0	0	0	0	0	0	0	0	0	0	0	0	0	0	0	0	0	0	0	0
209.1/5.8 (11788)	209.127	5.79	11788	6.15386	0	0	0	0	0	0	1.84452	0	0	0	0	0	0	0	0	0	0	0	0	0	0	0	0	0	0	0	0	1.82003	0	0	0	0	0	0	0	0	0	0	0	0	0	0	0	0	0
209.1/1.1 (11789)	209.127	1.12	11789	61.7019	60.0388	81.2034	126.291	76.9647	84.0581	88.3712	96.0624	91.3747	102.644	85.6537	102.249	86.087	114.966	112.488	117.778	118.519	113.237	104.418	101.181	103.475	112.581	115.678	122.761	101.761	102.691	126.969	106.572	111.313	86.3559	0	0	0	0	0	0	0	0	0	0.59307	0	0	0	0	1.52706	0
209.1/5.0 (11791)	209.128	5	11791	0	0	0	0	0	0	0	0	0	44.6724	52.3625	6.10343	0	0	71.3005	0	0	0	0	0	0	0	0	0	0	0	0	0	0	0	0	0	0	0	0	0	0	0	0	0	0	0	0	0	0	0
209.2/15.2 (11802)	209.189	15.18	11802	0	6.38748	0	0	0	0	5.17257	18.9198	20.8284	0	23.0637	13.7275	14.7725	0	4.42642	0	1.89456	0	7.7531	20.3366	21.4687	9.83271	15.6227	15.8752	12.2393	17.8833	0	3.44559	0	0	0	17.7729	16.9376	7.86234	17.3907	14.8701	12.3051	19.4474	6.79119	20.8122	20.533	15.0341	21.2077	13.3325	19.4395	22.6248
209.2/12.8 (11806)	209.189	12.8	11806	14.006	5.62834	4.59395	0	0	0	10.8186	7.84286	8.56498	4.38214	11.3839	13.2218	2.95597	0	0	7.4441	0	5.74779	0	0	0	0	2.28347	0	0	0	0	1.4493	0	0	4.16607	18.4449	8.22043	9.58278	6.99982	2.4327	7.58116	4.36342	3.51787	9.56825	4.38585	9.34445	11.42	10.8228	11.7105	12.3621
209.9/14.7 (11811)	209.932	14.75	11811	0	0	0	2.84766	0	0	0	0	0	0	0	0	0.890802	0	0	0	2.96185	0	0	0	0	0	0	0	0	0	0	0	0	0	0.379023	0	0	0	2.87949	0	0	0	0	0	0	0	0	0	0	0
210.0/3.5 (11828)	210.042	3.47	11828	0	0	0	0	4.46333	3.70906	0	0	0	0	1.87823	0	0.852152	0	0	0	0	0	0	0	0	0	0	0	0	0	0	0	0	0	0	0	0	0	0	0	0	0	0	0	0	0	0	0	0	0
210.1/1.1 (11831)	210.071	1.1	11831	0	0	0	0	0	0	0	0	0	0	0	0	0	0	0	0	0	0	0	0	0	0	0	0	0	0	0	0	0	0	0	0	0	0	0	0	0	0	0	0	3.95009	2.79094	6.42694	0	0	0
210.1/1.1 (11834)	210.091	1.13	11834	0	0	0	0	0	0	6.64675	0	0	0	0	4.86795	0	0	0	0	5.02963	0	0	0	0	0	0	0	0	0	0	0	0	0	0	0	0	0	0	0	0	0	0	0	0	0	0	0	0	0
210.2/12.5 (11852)	210.184	12.53	11852	22.4827	23.757	15.2286	0	9.20791	0	16.1844	28.8193	30.8573	0	38.5355	21.0704	14.3913	6.61634	13.4412	15.3143	9.45859	0	1.85125	4.9898	10.1635	3.96035	13.2947	4.89262	8.18426	4.24177	0	8.76636	0	7.92473	4.92291	24.5914	21.1171	26.9333	18.5254	6.43482	26.8258	25.8038	23.5876	18.6564	15.213	28.8245	24.5089	29.4274	26.2823	17.9869
211.0/1.3 (11867)	210.975	1.35	11867	0	0	0	0	0	0	0	0	2.88716	0	2.38005	0	45.1264	0	0	0	0	0	0	0	0	0	0	0	0	0	0	0	0	0	0	0	0	0	0	0	0	0	0	0	0	0	0	0	0	0
211.1/8.5 (11874)	211.076	8.54	11874	0	0	0	0	0	0	0	0	0	0	0	0	0	0	0	0	0	0	0	0	0	0	0	0	14.0673	0	0	0	0	0	0	0	0	0	0	0	0	0	0	0	0	0	0	1.21933	0	0
211.1/13.5 (11878)	211.099	13.51	11878	0	4.01309	0	0	1.63862	0	0	9.55955	5.03516	0	6.34493	3.30697	0	0	1.96208	0	0	4.51743	0	0	1.0268	0	3.91235	0.930196	0	0	0	4.68214	1.29393	0	0	13.574	5.3453	3.94456	4.67436	0	4.37817	0	0	5.56801	5.61602	8.3092	0	2.66773	3.45615	4.45661
211.1/3.8 (11893)	211.107	3.83	11893	0	0	0	35.1658	0	0	0	0	0	0	0	59.9405	68.7624	69.1619	0	0	0	0	0	78.3044	0	98.2792	0	0	0	67.0773	67.5423	0	0	0	0	0	0	0	0	0	2.86796	0	0	0	0	0	0	0	0	0
211.1/3.6 (11894)	211.107	3.55	11894	89.2995	32.5406	41.867	32.4889	0	0	49.3065	21.4154	0	0	66.587	31.0367	36.5293	0	123.092	18.1186	35.0376	0	73.5241	0	0	0	9.25149	0	0	0	118.778	70.1014	16.1098	0	0	0	0	0	0	0	0	0	0	0	0	0	0	0	0	0
211.1/4.0 (11895)	211.107	3.98	11895	139.79	66.0565	56.7802	0	56.5371	47.555	68.544	63.8547	91.9423	79.1628	91.5835	0	0	0	204.333	89.9126	85.9611	0	65.055	0	79.1699	57.4398	77.9249	84.2149	89.1622	0	0	81.7982	64.6988	60.1413	0	0	0	0	0	0	0	0	2.68394	2.7383	0	2.90341	5.0582	0	1.01192	0
211.1/6.3 (11897)	211.108	6.29	11897	5.58071	0	4.63374	0	2.41781	0	0	0	0	0	0	0	0	0	0	10.3539	0	6.93565	3.06467	0	0	0	0	0	0	0	1.13192	0	4.56899	0	0	0	0	0	0	0	0	0	0	0	0	0	0	0	0	0
211.1/1.0 (11899)	211.109	1.02	11899	0	0	6.34636	0	0	0	0	63.2417	0	0	33.0221	50.7416	24.842	48.2373	0	0	0	0	0	0	0	0	0	25.6114	0	7.53983	0	0	0	0	0	0	0	0	0	0	21.7305	22.3836	0	22.3946	18.1186	27.1365	32.4208	20.5299	0	0
211.1/3.6 (11903)	211.109	3.56	11903	0	0	0	0	0	8.4034	3.70156	0	0	0	0	0	0	59.133	0	0	5.18856	27.538	0	0	3.01212	0	0	0	0	0	0	0	0	0	0	0	0	0	0	0	0	0	0	0	0	0	0	0	0	0
211.1/1.1 (11910)	211.117	1.11	11910	0	0	0	0	0	0	0	0	0	0	0	0	0	0	0	0	0	0	0	5.08599	4.16401	0	0	0	3.30121	0	0	0	0	0	0	0	0	0	0	0	0	0	27.4642	0	0	0	0	0	24.3482	0
211.1/6.4 (11914)	211.122	6.39	11914	0	0	0	0	0	15.4703	0	0	0	0	0	0	0	24.6897	0	0	0	0	35.4162	0	0	0	0	0	0	12.7207	43.3008	0	0	0	0	0	0	0	0	0	0	0	0	0	0	0	0	0	0	0
211.1/5.5 (11916)	211.144	5.47	11916	3198.95	2041.14	1922.25	0	0	0	0	0	2527.71	2598.62	2274.69	0	2102.46	0	3243.96	2927.78	2109.13	0	835.484	0	703.176	1148.51	850.948	879.975	888.819	496.168	997.695	2604.04	3267.86	1981.64	0.881875	0	0	0	2.44726	0	43.3375	42.799	46.3861	21.9602	5.11964	15.7116	59.4007	19.2239	39.868	6.59261
211.1/5.8 (11917)	211.144	5.79	11917	4426.82	2079.91	2290.07	2022.98	2555.29	1998.59	1961.75	2052.21	2556.22	2272.79	2353.6	2579.44	2704.13	2519.19	3439.7	3327.85	2623.91	0	0	0	0	0	0	0	0	0	0	3149.13	4032.73	2516.05	0	0	0	0	0	0	42.6089	35.2931	49.1492	31.7596	29.3288	2.68645	66.8256	32.2043	59.3694	0
211.1/5.2 (11918)	211.144	5.22	11918	11.6556	0	3.93682	0	0	0	0	0	0	0	11.545	0	0	0	7.38097	9.92177	6.87943	0	1004.02	0	0	2.98575	8.868	0	0	768.751	1197.11	0	10.1717	6.78276	2.96174	4.1953	2.92829	0	0	0	0	0.794125	0	0	0	0	0	6.19552	0	0
211.1/5.6 (11919)	211.144	5.58	11919	1304.57	432.58	712.617	283.896	356.26	268.351	175.399	327.405	218.445	0	172.585	177.138	235.604	191.917	558.202	569.243	788.824	0	0	438.3	536.309	990.513	811.239	749.416	729.962	0	0	565.175	1445.34	435.975	0	0	0	0	0	0	15.9796	7.22968	0	12.8084	3.23425	3.27315	10.4162	0	11.092	0
211.1/5.4 (11920)	211.144	5.36	11920	0	0	0	2130.21	1876.71	1927.41	2150.69	2001.86	0	0	0	2256.18	0	2304.91	0	0	0	0	0	746.814	0	0	0	0	0	0	0	0	0	0	0	0	0	8.16112	2.29247	10.3897	0	0	0	0	0	0	0	0	0	0
211.2/11.5 (11930)	211.168	11.5	11930	259.392	172.877	195.658	101.447	133.209	0	181.445	205.288	246.86	0	286.785	211.439	187.372	139.239	155.042	155.659	142.996	0	95.6147	110.196	145.175	87.2173	195.487	153.083	124.171	122.455	144.217	135.354	79.9534	142.454	148.245	243.525	187.923	172.04	144.624	142.613	170.794	144.129	150.005	174.769	143.705	168.347	255.304	223.019	174.44	146.926
211.2/12.8 (11934)	211.169	12.83	11934	77.7181	0	29.0595	0	0	3.3812	37.0542	48.1224	68.9241	34.9124	58.686	31.4092	51.0261	0	27.9973	44.4423	24.2567	23.2412	5.28032	20.2714	0	5.73902	53.2291	0	46.137	0	17.6032	34.0729	3.90397	21.554	42.0541	70.8049	46.1134	36.7311	59.3048	0	0	37.5388	52.4245	0	39.8212	0	0	36.2481	44.2736	26.5259
211.2/11.5 (11938)	211.171	11.48	11938	0	0	0	0	0	103.559	0	0	0	179.016	0	0	0	0	0	0	0	165.146	0	0	0	0	0	0	0	0	0	0	0	0	0	0	0	0	0	0	0	0	0	0	0	0	0	0	0	0
211.9/1.2 (11943)	211.946	1.23	11943	0	0	0	0	0	0	0	0	0	97.2655	0	0	2.34709	21.4729	0	0	0	0	0	0	0	0	0	0	0	0	0	0	0	0	0	0	0	0	0	0	0	0	0	0	0	0	0	0	0	0
212.0/1.2 (11945)	211.993	1.17	11945	0	0	0	0	0	0	327.673	229.374	254.661	10.8899	195.877	223.206	92.129	39.4838	0	0	0	0	0	0	0	0	0	0	0	0	0	0	0	0	0	0	0	0	0	0	0	0	0	0	0	0	0	0	0	0
212.0/1.9 (11946)	212.021	1.86	11946	0	0	0	0	0	0	17.826	13.9232	38.1999	0	0.827383	109.412	72.0407	0	0	0	0	0	0	0	0	0	0	0	0	0	0	0	0	0	0	0	0	0	0	0	0	0	0	0	0	0	0	0	0	0
212.0/2.7 (11947)	212.023	2.69	11947	0	0	0	0	0	0	0	13.9668	11.0611	99.1137	12.9792	30.8812	4.43151	574.462	27.1645	0	0	0	0	0	0	0	0	0	0	0	0	0	0	0	0	0	0	0	0	0	0	0	0	0	0	0	0	0	0	0
212.0/1.1 (11948)	212.05	1.1	11948	0	0	0	0	0	0	0	0	0	0	0	0	0	0	0	0	0	0	0	0	0	0	0	0	0	0	0	0	0	0	0	0	0	0	0	0	0	0	0	16.8382	12.425	18.6355	17.9869	8.93746	0	0
212.1/1.1 (11949)	212.053	1.12	11949	0	0	0	0	0	0	0	0	0	0	0	0	0	0	0	0	0	0	0	0	0	0	0	0	0	0	0	0	0	0	0	0	0	0	0	0	0	0	0.961072	0	0	0	0	0	9.47912	0
212.1/1.4 (11950)	212.053	1.39	11950	0	0	2.25239	0	0	0	0	0	0	0	0	0	0	0	0	0	0	0	0	0	2.42682	0	0	6.25219	0	0	2.90563	0	0	0	0	0	0	0	0	0	0	0	0	0	0	0	0	0	0	0
212.1/3.1 (11955)	212.09	3.07	11955	0	12.0234	0	0	3.32015	0	0	0	0	0	0	0	6.22889	11.824	0	0	0	0	0	8.53935	0	7.91624	0	0	3.73896	8.07495	0	0	0	0	0	0	0	0	0	0	0	0	0	0	0	0	0	0	0	0
212.1/1.2 (11961)	212.1	1.22	11961	0	0	0	0	0	0	0	0	0	0	0	0	0	0	0	0	0	0	0	0	0	0	0	3.48926	0	0	0	0	0	0	0	0	0	0	0	0	0	0	4.99708	0	5.97364	6.08575	0	0	0	0
212.1/1.7 (11962)	212.102	1.67	11962	0	0	180.828	0	146.058	134.551	171.06	139.417	201.027	55.804	156.108	0	131.704	54.0852	0	261.692	217.649	95.0654	176.467	0	123.5	128.856	193.091	141.403	182.356	0	0	245.555	0	213.775	0	0	0	0	0	0	0	0	0	0	0	0	0	0	0	0
212.1/1.5 (11963)	212.102	1.51	11963	464.844	153.955	9.71032	179.517	0	0	0	2.42115	0	0	10.306	161.791	19.6753	0	244.849	0	0	0	0	85.673	0	0	0	0	0	128.463	238.145	0	220.99	0	0	0	0	0	0	0	0	0	0	0	0	0	0	0	0	0
212.1/1.1 (11964)	212.102	1.12	11964	251.124	146.155	169.424	215.192	167.845	183.615	318.22	315.203	308.431	234.292	314.436	286.72	249.002	256.55	355.581	202.341	211.301	196.123	173.742	132.101	146.279	176.073	164.451	160.045	220.7	162.445	224.013	212.64	228.966	223.757	0	0	0	0	0	0	1.74761	0	0	0	0	0	6.01587	2.00049	2.97401	0
212.2/9.0 (11981)	212.165	8.99	11981	52.2136	63.3558	63.731	35.9028	45.8345	32.3996	49.9831	57.1936	75.2094	45.4674	77.0777	56.9897	57.8125	11.4276	31.3585	63.1753	71.4644	66.2061	17.1844	40.3487	58.761	19.6645	81.4246	51.3343	49.4561	23.3023	23.2456	54.911	25.9088	36.8323	45.6942	61.0761	57.2328	46.5395	38.776	43.1578	47.0587	44.6469	46.7173	48.3586	47.0186	44.0623	44.3222	69.1541	46.3268	49.2649
213.0/1.1 (11993)	213.014	1.08	11993	0	0	0	0	0	0	0	0	0	0	0	0	0	0	0	0	0	0	0	0	0	0	0	0	0	0	0	0	0	0	0	0	0	0	0	0	8.40859	6.51713	4.3619	0	0	0	0	0	0	0
213.1/4.4 (11998)	213.066	4.43	11998	0	0	0	0	0	0	0	1.81156	0	0	1.28545	0	0	3.37848	0	0	0	0	11.705	2.76809	0	2.95461	0	0	0	5.19825	15.7471	0	0	0	0	0	0	0	0	0	0	0	0	0	0	0	0	0	0	0
213.1/4.6 (11999)	213.069	4.55	11999	0	0	0	0	0	0	8.55303	0	0	0	0	0	0	0	0	0	0	2.03584	0	0	0	0	0	0	0	0	0	0	0	0	0	0	0	0	0	0	0	0	0	0	0	0	0	0	0	0
213.1/1.5 (12005)	213.085	1.48	12005	0	0	0	0	0	0	0	3.31452	6.80636	0	0	0	0	0	0	0	0	0	0	0	11.2744	0	0	0	2.90225	2.79523	0	1.64902	0	0	0	0	0	0	0	0	0	0	0	0	0	0	0	0	0	0
213.1/2.0 (12008)	213.086	1.98	12008	8.12316	53.6906	47.3731	15.9607	33.2806	0	0	1.71599	53.9118	16.8884	17.8605	42.5906	27.8154	5.1031	73.3243	3.40677	0	0	3.00524	0	41.6968	29.0624	10.7944	1.7393	8.99337	29.4438	67.3158	0	0	0	0	0	0	0	0	0	0	0	0	0	0	0	0	0	0	0
213.1/2.0 (12012)	213.089	1.98	12012	0	0	0	0	0	0	0.997414	0	0	0	0	0	0	0	0	0	0	39.3935	0	0	0	0	0	0	0	0	0	0	0	2.37482	0	0	0	0	0	0	0	0	0	0	0	0	0	0	0	0
213.1/5.3 (12016)	213.101	5.26	12016	0	0	0	0	0	0	0	0	9.81162	5.6093	0	5.32938	10.4425	0	0	0	0	0	0	0	0	0	0	0	0	0	0	0	0	0	0	0	0	0	0	0	158.808	130.609	78.0583	74.6919	61.7833	38.0716	43.6453	40.8152	39.2681	0
213.1/1.5 (12034)	213.122	1.47	12034	59.6161	0	177.155	114.882	0	0	0	14.6248	17.2185	0	27.4685	0	40.9574	0	48.1736	372.289	633.847	0	47.051	0	14.9346	19.0714	35.7418	91.1391	36.0434	36.9896	35.5864	447.837	260.171	278.084	0	0	0	0	0	0	0	0	0	0	0	0	0	0	0	0
213.1/3.7 (12036)	213.123	3.75	12036	3.08975	0	0	0	0	0	4.26624	0	23.4664	7.37896	0	0	0	0	64.0174	3.82322	0	0	0	0	0	0	0	0	0	0	0	0	2.49064	0	0	0	0	0	0	0	0	0	0	0	0	0	0	0	0	0
213.1/1.1 (12037)	213.123	1.13	12037	464.38	433.884	445.961	527.26	456.31	418.046	86.6671	101.286	92.8356	133.078	134.713	182.952	137.352	129.412	192.778	1409.84	1442.81	0	109.201	103.238	94.6345	115.053	226.362	168.718	129.14	121.275	96.1447	1130.44	1338.08	1076.13	0	0	0	0	0	0	0	2.58134	2.91169	1.3932	0	1.05417	2.01767	0	0	0
213.1/1.3 (12040)	213.125	1.34	12040	0	39.0233	0	0	86.6315	130.539	12.2611	0	0	4.27583	0	11.637	0	13.7732	0	0	0	87.5306	0	17.3174	0	0	0	0	0	0	0	0	0	0	0	0	0	0	0	0	0	0	0	0	0	0	0	0	0	0
213.1/4.0 (12043)	213.126	4.02	12043	2.03148	0	0	0	0	0	0	0	0	0	0	0	0	0	9.02141	0	0	0	0	0	0	0	0	0	0	0	1.99479	0	0	0	0	0	0	0	0	0	0	0	0	0	0	0	0	0	0	0
213.1/10.9 (12047)	213.146	10.86	12047	79.6631	0	0	0	0	0	0	0	0	0	0	0	0	0	0	0	0	0	0	0	0	0	0	0	0	0	0	0	0	0	0	0	0	0	0	0	0	0	0	0	0	0	0	0	0	0
213.2/2.7 (12062)	213.159	2.7	12062	46.6064	0	0	0	0	13.7927	0	0	2.41667	1.8992	0	0	0	7.24282	20.2186	0	0	0	0	0	0	0	0	0	0	0	0	0	0	0	0	0	0	0	0	0	0	0	0	0	0	0	0	0	0	0
213.2/6.8 (12063)	213.159	6.84	12063	301.527	188.878	195.909	237.754	198.832	224.853	120.284	125.047	149.985	8.37304	127.078	130.794	103.201	128.673	203.9	191.196	150.321	174.96	0	0	0	0	0	0	0	0	0	167.282	271.354	186.992	0	0	0	0	0	0	0	0	0	0	0	0	0	0	0	0
213.2/14.5 (12071)	213.18	14.55	12071	0	0	0	0	0.570956	0	0	0	0	0	0	0	2.85881	0	0	0	0	0	0	0	0	0.526644	0	3.77413	1.15532	0	0	0	0	0	0	0	0	0	0	0	0	0	0	0	0	0	0	0	0	1.91982
214.0/1.4 (12076)	214.001	1.44	12076	5.37514	0	5.5597	104.359	3.16428	8.90584	0	0	0	0	1.69553	1.21847	0	1.70131	0	0	0	0	111.375	38.5621	15.1665	235.411	3.05277	27.5119	0	57.313	7.08299	4.74358	17.6677	18.0955	0	0	0	0	0	0	0	0	0	0	0	0	0	0	0	0
214.1/3.3 (12086)	214.051	3.35	12086	0	0	0	0	0	0	0	2.95768	0	0	3.83343	8.37941	0	0	0	0	0	0	0	0	0	0	0	0	0	0	0	0	0	0	0	0	0	0	0	0	0	0	0	0	0	0	0	0	0	0
214.1/1.1 (12089)	214.058	1.14	12089	0	0	0	0	0	0	0	0	0	0	23.3234	0	8.04164	0	0	0	0	0	0	20.0886	0	0	0	21.5861	22.2525	0	21.4987	0	0	0	0	0	0	0	0	0	0	0	0	0	0	0	0	0	0	0
214.1/1.5 (12088)	214.058	1.45	12088	0	0	0	0	0	0	0	0	11.8501	0	0	10.6674	0	0	0	0	0	0	0	13.8706	11.0565	4.37963	0	0	0	0	30.6033	0	0	0	0	0	0	0	0	0	0	0	0	0	0	0	0	0	0	0
214.1/1.6 (12090)	214.059	1.55	12090	0	0	0	0	0	0	0	5.15643	0	0	16.3414	0	0	0	0	0	0	0	0	0	0	0	13.1614	25.3787	10.5993	0	0	0	0	0	0	0	0	0	0	0	0	0	0	0	0	0	0	0	0	0
214.1/1.4 (12092)	214.061	1.44	12092	0	0	0	0	0	0	10.3872	3.87834	0	0	0	0	15.9441	0	20.4307	0	0	0	0	0	0	0	0	0	0	21.3882	0	0	0	0	0	0	0	0	0	0	0	0	0	0	0	0	0	0	0	0
214.1/1.1 (12097)	214.078	1.12	12097	0	0	0	0	0	0	0	0	0	0	0	0	0	0	0	0	0	0	0	0	0	0	0	0	0	0	0	0	0	0	0	0	0	0	0	0	0	0	0	5.16286	0	0	5.3147	3.13344	0	0
214.1/4.4 (12099)	214.086	4.37	12099	0	0	0	0	2.60794	0	25.0157	33.6702	29.5927	63.8655	64.5978	57.1353	19.6739	0	95.883	0	0	0	0	0	0	0	1.95819	0	0	0	0	0	0	0	0	0	0	0	0	0	0	0	0	0	0	0	0	0	0	0
214.1/4.3 (12100)	214.087	4.27	12100	0	0	0	0	0	0	3.01657	0	5.86713	0	0	0	23.422	76.4748	0	0	0	0	3.24651	0	0	0	0	0	0	0	22.4845	0	0	0	0	0	0	0	0	0	0	0	0	0	0	0	0	0	0	0
214.1/3.4 (12109)	214.125	3.41	12109	4.17332	0	0	11.6597	0	0	0	0	0	0	1.26874	0	0	0	0	0	0	0	0	0	0	0	0	0	0	0	0	0	0	0	0	0	0	0	0	0	0	0	0	0	0	0	0	0	0	0
214.1/1.0 (12112)	214.129	1.01	12112	26.4465	45.6844	46.2456	98.0015	47.4833	45.129	54.0262	61.1665	63.8395	0	58.7034	62.9117	60.9965	62.9422	72.1048	49.6783	46.7719	89.4979	61.0158	76.0538	81.0831	96.6922	63.725	87.3595	0	87.7829	91.048	60.2945	44.7964	50.8474	0	0	0	0	0	0	12.5673	13.2843	19.5157	6.89152	4.94656	0	9.60495	3.92401	11.0252	0
214.2/10.2 (12118)	214.179	10.2	12118	51.4904	46.4267	38.9302	16.1896	29.7727	11.4797	0	99.2072	74.3694	0	130.258	0	39.1414	9.73442	25.888	29.1908	35.3437	0	4.10497	18.1553	31.1054	2.26915	49.0941	20.9709	25.9429	9.09085	8.32763	29.016	7.04731	26.493	50.5252	169.092	69.2037	75.2355	43.7833	41.3424	68.6743	74.3126	55.6732	58.9235	55.1971	68.0732	137.358	81.8509	146.946	45.5687
214.2/10.2 (12120)	214.181	10.21	12120	0	0	0	0	0	0	54.4565	0	0	36.6999	0	90.7892	0	1.17682	0	0	0	51.1415	0	0	0	0	0	0	1.14997	0	0	0	0	0	0	0	0	0	0	0	0	0	0	0	0	0	0	0	0	0
214.3/12.9 (12123)	214.252	12.89	12123	5.74232	0	0	0	0	0	0	0	0	0	0	0	0	0	0	0	0	0	0	0	0	0	1.3101	0	0	0	0	0	0	0	0	0	0	0	0.668478	0	0	0	0	0	0	0	0	0	0	0
214.3/12.4 (12124)	214.253	12.4	12124	243.059	162.232	106.917	67.2253	83.2891	67.0486	159.622	192.347	180.291	102.66	260.244	200.685	98.1819	87.4624	86.9759	123.45	95.6295	0	79.6775	77.0974	90.2051	103.43	203.067	149.741	96.6133	68.8155	100.457	92.603	78.938	78.3843	75.2952	199.124	151.703	175.11	118.891	117.599	175.969	154.959	160.444	167.308	144.242	172.554	218.773	185.319	208.83	159.239
214.6/7.9 (12126)	214.577	7.93	12126	121.261	72.4054	71.7831	474.988	72.9284	69.5581	0	0	0	0	0	0	0	0	0	91.5991	78.9486	0	0	1.23912	0	0	0	0	0	0	0	85.3359	102.487	73.3838	0	0	0	0	0	0	0	0	0	0	0	0	0	0	0	0
215.0/1.2 (12138)	215.013	1.25	12138	0	0	0	0	0	0	11.066	14.2913	0	0	0	0	0	0	0	0	0	7.77064	0	0	0	0	0	0	0	0	0	0	0	0	0	0	0	0	0	0	0	0	0	0	0	0	0	0	0	0
215.0/1.3 (12139)	215.016	1.3	12139	189.327	61.796	237.147	0	137.299	233.554	0	0	0	0	14.9921	9.54168	8.46539	0	27.7808	144.554	287.577	0	186.449	17.4351	72.0064	52.0868	151.878	295.038	73.9219	91.6598	57.4453	172.219	216.675	224.114	0	0	0	0	0	0	0	0	0	0	0	0	0	0	0	0
215.1/4.2 (12149)	215.081	4.17	12149	16.9212	10.9865	12.2209	0	7.48836	4.96911	71.7827	47.1646	89.8634	96.9633	60.1699	41.4097	0	0	105.446	6.61116	0	0	0	0	28.8914	58.6711	29.1185	22.7093	50.2588	0	0	4.42959	9.13508	0	0	0	0	0	0	0	0	0	0	0	0	0	0	0	0	0
215.1/4.1 (12150)	215.082	4.07	12150	0	0	0	3.63107	0	0	0	0	0	0	0	0	47.1513	45.192	4.96377	0	3.90498	12.6957	51.452	25.6102	0	0	1.0296	2.46139	0	23.9915	68.0927	4.26231	0	1.24638	0	0	0	0	0	0	0	0	0	0	0	0	0	0	0	0
215.1/4.8 (12165)	215.102	4.78	12165	0	0	0	114.049	0	78.9417	0	0	0	0	0	0	0	0	0	0	0	0	0	0	0	0	0	0	0	0	0	0	0	34.3842	0	0	0	0	0	0	0	0	0	0	0	0	0	0	0	0
215.1/5.3 (12167)	215.102	5.3	12167	130.591	72.0432	68.7299	88.6583	65.6207	61.9942	0	0	0	0	0	0	0	0	8.6703	21.2335	0	0	0	0	8.90624	0	0	0	3.73362	0	0	15.0689	57.8695	21.1076	0	0	0	0	0	0	0	0	0	0	0	0	0	0	0	0
215.1/4.8 (12174)	215.104	4.81	12174	135.961	51.1858	73.3385	0	84.1703	0	0	4.99756	3.82907	0	9.2638	6.23638	11.2822	12.3458	30.8569	16.0206	0	9.23326	0	0	0	2.45808	0	0	5.5752	2.14485	0	25.4787	36.1512	0	0	0	0	0	0	0	0	0	0	0	0	0	0	0	0	0
215.1/4.8 (12193)	215.125	4.82	12193	0	0	0	0	0.646831	4.16497	0	0	0	4.43004	7.26968	0	0	0	0	4.84087	0	0	4.02921	0	0	5.1935	7.72673	3.95285	0	5.12539	0	0	0	10.9698	12.2358	0	38.6021	2.4955	4.98604	12.8239	19.3239	13.9804	22.2048	14.1339	8.18421	11.1182	15.8543	34.1391	11.9532	20.5456
215.1/5.0 (12195)	215.126	5.05	12195	0	0	0	0	0	0	0	0	0	0	0	0	0	0	0	0	0	0	0	4.93195	0	3.83549	0	7.31282	0	0	0	7.05888	2.05777	0	0	0	0	0	0	0	0	0	0	0	0	0	0	0	7.82667	5.70098
215.1/2.2 (12206)	215.135	2.22	12206	0	0	0	0	0	20.8162	0	0	9.1689	0	0	0	0	0	2.82022	0	0	0	0	0	0	0	0	0	0	0	0	0	0	0.960461	0	0	0	0	0	0	0	0	0	0	0	0	0	0	0	0
215.1/3.1 (12210)	215.137	3.12	12210	0	0	0	0	0	0	10.879	3.62426	0	0	6.69011	7.88667	25.076	0	13.6709	0	0	0	0	91.348	121.081	0	98.4052	94.2462	108.762	0	0	0	0	0	0	0	0	0	0	0	0	0.648811	0	0	0	0	0	0	0	0
215.1/4.9 (12211)	215.137	4.89	12211	4.59777	0	0	0	0.836339	0	0	0	0	0	0	0	0	0	0	2.50323	0	0	0	0	0	0	0	0	0	0	0	0.57668	1.68967	0	0	0	0	0	0	1.37011	0	0	0	0	0	0	0	0	0	0
215.1/3.3 (12214)	215.137	3.29	12214	0	44.3187	0	81.8041	0	0	95.4578	76.6769	0	0	79.6497	78.5563	49.9621	69.7742	0	3.94454	0	0	0	0	0	72.4012	0	0	0	28.57	0	0	0	0	0	0	0	0	0	0	0	0	0	0	0	0	0	0	0	0
215.1/2.0 (12216)	215.138	2.02	12216	130.645	6.03081	0	0	1.28414	0	0	0	0	0	0	0	0	0	3.34465	0	0	0	0	0	0	3.52076	0	0	0	0	0	0	0	0	0	0	0	0	0	0	0	0	0	0	0	0	0	0	0	0
215.1/1.1 (12218)	215.138	1.15	12218	437.788	347.127	362.069	841.447	402.26	469.73	50.5078	50.0702	38.7107	0	58.9753	84.2727	72.8256	0	115.562	691.358	617.183	0	130.387	73.8297	118.554	120.43	128.065	45.0865	63.7639	90.1947	35.9637	665.348	978.834	689.061	0	0	0	0	0	0	0.225701	0	2.29844	0	0	0	0	0	0	0
215.1/2.3 (12220)	215.138	2.3	12220	0	112.67	0	788.601	0	0	3.02657	2.65034	0	0	3.12557	16.0678	0	0	14.4664	0	0	0	0	0	0	0	0	0	0	0	0	0	2.73421	0	0	0	0	0	0	0	0	0	0	0	0	0	0	0	0	0
215.1/2.5 (12219)	215.138	2.52	12219	0	0	0	0	19.1631	179.415	50.4686	13.0767	0	62.5432	0	0	0	114.827	0	648.328	0	0	0	0	0	0	1.24222	0	0	34.3303	0	0	0	0	0	0	0	0	0	0	0	0	0	0	0	0	0	0	0	0
215.1/2.8 (12223)	215.139	2.79	12223	0	0	288.7	0	307.737	0	0	0	0	0	0	0	76.0344	0	0	0	707.281	0	269.481	56.3463	111.233	0	135.256	52.1986	20.3245	0	55.3627	725.571	830.208	622.37	0	0	0	0	0	0	0	0	0	0	0	0	0	0	0	0
215.1/3.1 (12226)	215.14	3.09	12226	0	0	0	0	0	0	0	0	0	0	5.61443	0	0	0	0	0	0	12.1946	112.159	0	0	175.726	0	0	0	0	0	0	0	0	0	0	0	0	0	0	0	0	0	0	0	0	0	0	0	0
215.1/2.4 (12228)	215.141	2.37	12228	0	0	0	0	0	0	0	0	8.97956	2.19722	31.0457	0	0	4.60138	6.56834	0	0	298.411	0	0	0	0	0	0	0	0	0	0	0	0	0	0	0	0	0	0	0	0	0	0	0	0	0	0	0	0
216.0/9.1 (12244)	215.976	9.13	12244	0	0	0	0	22.4368	0	0	0	13.0702	3.23134	0	0	5.13904	0	3.6284	16.3003	17.2407	0	0	0.0497923	18.1303	6.70545	6.86725	3.64433	9.10687	0	0	14.3432	12.6592	6.22404	0	0	0	0	33.0552	31.5751	37.9027	37.1439	26.8497	0	0	0	0	0	0	4.03674
216.0/9.1 (12245)	215.979	9.14	12245	0	0	0	0	0	0	5.46164	10.711	0	0	18.5624	13.911	0	0	0	0	0	8.69509	0	4.05708	0	0	0	0	0	0	0	0	0	0	0	0	0	43.1027	0	0	0	0	0	0	0	0	0	0	0	0
216.0/1.4 (12249)	216.018	1.39	12249	0	0	19.6745	0	0	7.32221	0	0	0	0	0	0	0	0	0	0	0	0	0	0	0	0	6.46624	24.6623	0	0	0	0	4.03076	6.77079	0	0	0	0	0	0	0	0	0	0	0	0	0	0	0	0
216.0/3.4 (12254)	216.049	3.44	12254	0	0	0	0	0	0	41.1745	44.8587	33.9582	0	32.2944	26.4359	24.5905	0	18.6013	0	0	0	0	0	0	0	0	0	0	0	0	0	0	0	0	0	0	0	0	0	0	0	0	0	0	0	0	0	0	0
216.1/2.8 (12255)	216.05	2.79	12255	0	0	0	0	0	0	38.7493	0	0	0	12.4649	8.67232	0	0	58.0568	0	0	0	0	0	0	0	0	0	0	0	0	0	0	0	0	0	0	0	0	0	0	0	0	0	0	0	0	0	0	0
216.1/1.7 (12257)	216.052	1.75	12257	0	0	18.2515	0	0	0	0	0	0	0	0	0	0	0	0	0	0	0	0	0	0	0	0	0	0	0	0	0	2.65118	16.7468	0	0	0	0	0	0	0	0	0	0	0	0	0	0	0	0
216.1/5.0 (12259)	216.06	4.99	12259	0	0	0	0	0	2.14978	0	0	0	0	0	0	125.767	0	0	0	0	0	0	36.2859	0	0	0	0	0	0	0	0	0	0	0	0	0	0	0	2.83024	0	0	0	13.8078	6.49631	0	0	0	0	0
216.1/4.9 (12260)	216.061	4.89	12260	0	0	0	0	0	0	0	166.101	0	27.7403	0	0	0	0	0	0	0	0	0	9.06364	0	0	0	16.472	0	84.864	191.535	1.28241	0	0	0	0	0	1.64608	2.42423	0	12.692	9.38304	0	7.49516	7.49016	13.0057	7.74098	0	5.99997	0
216.1/5.0 (12261)	216.062	5.05	12261	6.30731	0	0	0	0	2.24465	139.27	0	176.013	85.8043	169.136	122.853	0	104.273	280.758	19.8443	11.5115	0	126.641	0	85.2133	83.2713	90.4756	65.1271	96.363	0	0	8.45297	22.3253	0	0	0	0	8.97924	2.69307	0	13.1566	14.066	36.8019	0	1.63394	26.0615	21.8582	15.7467	13.4801	35.817
216.1/3.1 (12265)	216.085	3.14	12265	0	20.1732	0	0	0	0	2.28522	23.1269	20.0531	0	12.9944	21.65	30.1453	0	0	0	0	0	0	20.2165	24.7486	67.7774	0	0	0	0	17.5494	0	0	0	0	0	0	0	0	0	0	0	0	0	0	0	0	0	0	0
216.1/2.8 (12269)	216.086	2.81	12269	63.2213	0	0	0	0	0	0	0	0	0	0	0	0	0	14.4745	0	0	0	0	0	0	0	0	0	38.9428	0	79.3532	6.68927	0	0	0	0	0	0	0	0	0	0	0	0	0	0	0	0	0	0
216.1/1.0 (12278)	216.096	1.05	12278	0	0	0	0	0	0	0	0	3.10357	1.54317	0	0	0	0	4.13187	0	0	0	0	0	0	0	0	0	0	0	0	0	0	0	0	0	0	0	0	0	0	0	0	0	0	0	0	0	0	0
216.1/1.4 (12279)	216.099	1.4	12279	0	0	6.24308	0	0	1.14658	0	0	2.62911	0.944666	0	0	0	0	0	0	0	0	0	0	0	0	2.38356	6.87686	8.76449	0	0	0	0	2.27657	0	0	0	0	0	0	0	0	0	0	0	0	0	0	0	0
216.1/6.0 (12285)	216.124	5.97	12285	0	0	0	0	0	0	5.9595	9.93034	0	0	0	8.19518	0	12.7009	0	0	0	0	0	0	0	0	0	0	0	0	0	0	0	0	0	0	0	0	0	0	0	0	0	0	0	0	0	0	0	0
216.2/9.4 (12300)	216.195	9.35	12300	59.7855	73.7279	68.9079	0	46.6356	34.7279	53.6601	72.4063	75.6994	29.2869	88.0602	75.0823	53.8834	0	23.676	64.264	70.0629	0	0	29.8139	64.7383	0	89.1256	35.0657	49.6549	0	0	66.3927	4.99841	15.5234	63.2488	100.871	112.119	82.6382	57.2055	75.545	95.945	91.8788	79.924	100.037	85.7603	85.5731	100.195	140.63	90.2483	87.8395
217.0/1.3 (12313)	217.018	1.3	12313	0	0	1.23892	0	0	0	0	0	0	2.47691	0	0	0	8.54064	0	0	1.67624	0	0	0	0	0	0	1.46515	0	0	0	0	0	0	0	0	0	0	0	0	0	0	0	0	0	0	0	0	0	0
217.1/1.6 (12316)	217.056	1.62	12316	0	0	0	15.0637	0	0	0	0	0	0	0	0	0	0	0	0	0	0	0	0	0	3.58908	0	0	0	5.00891	0	0	0	0	0	0	0	0	0	0	0	0	0	0	0	0	0	0	0	0
217.1/3.8 (12323)	217.063	3.76	12323	0	0	0	0	0	0	0	23.7225	35.2096	0	26.708	0	21.2185	0	40.3007	13.4233	9.28665	0	0	11.6726	9.46899	10.4899	17.6402	11.7644	31.7509	7.08921	0	13.8614	22.9199	0	0	0	0	0.30117	2.11735	3.16833	44.6899	43.3569	63.21	42.0491	37.8039	27.4452	65.2781	29.0271	65.9101	83.5747
217.1/3.5 (12325)	217.063	3.55	12325	0	0	0	0	0	0	29.5942	22.5184	0	0	15.6547	34.1153	0	26.1755	49.8275	146.128	87.2234	0	0	52.8035	64.2596	49.8518	62.0934	0	90.9101	46.6593	25.2659	87.2064	156.228	130.089	0	0	0	27.9922	10.5069	18.7938	161.661	153.196	79.2826	123.932	91.8038	104.136	188.044	120.083	112.619	96.0465
217.1/3.4 (12326)	217.063	3.42	12326	0	0	0	0	0	0	0	0	0	0	3.27792	0	0	0	0	0	0	0	0	0	0	0	0	0	0	0	68.6851	0	0	0	0	0	0	0	0	0	2.53978	6.03968	61.2873	0	0	0	0	0	0	23.317
217.1/5.6 (12327)	217.063	5.56	12327	0	0	0	0	0	0	0	0	0	0	0	0	0	0	0	6.46178	0	0	0	0	0	0	1.91332	3.21222	0	0	0.879804	0	7.79924	2.10694	0	0	0	0	0	0	0	0	0	0	0	0	0	0	0	0
217.1/1.8 (12328)	217.064	1.76	12328	0	2.07557	11.5123	0	5.59223	6.9834	0	0	3.14649	0	0	3.70424	1.5356	0	1.75679	16.6256	1.34082	0	0	0	0	4.53731	4.80262	3.14607	5.45245	0	9.35503	10.2247	0	6.66268	0	0	0	0	0	0	0	0	0	0	0	0	0	0	0	0
217.1/1.1 (12341)	217.083	1.1	12341	0	0	0	0	0	0	17.4984	0	0	0	9.85845	0	0	29.044	0	0	0	10.692	0	16.0987	0	0	0	0	0	0	0	0	0	0	0	0	0	0	0	0	0	0	0	0	0	0	0	0	0	0
217.1/6.0 (12344)	217.095	5.99	12344	0	0	0	0	0	0	0	33.2085	0	0	0	0	24.0277	34.3757	43.7424	0	0	0	0	0	0	0	0	0	0	0	0	0	0	0	0	0	0	0	0	0	0	0	0	0	0	0	0	0	0	0
217.1/4.0 (12346)	217.096	3.97	12346	0	0	0	76.6426	0	0	21.823	0	0	0	0	0	72.1749	147.599	0	0	0	0	203.24	0	0	0	0	0	0	70.3504	216.088	0	0	0	0	0	0	0	0	0	0	0	1.55682	0	0	0	0	0	0	0
217.1/4.1 (12347)	217.097	4.12	12347	186.103	87.9111	89.5935	0	53.1509	64.7065	69.6566	113.561	145.227	85.2041	118.924	122.664	0	0	232.148	166.551	130.364	49.1923	0	46.6048	117.948	227.667	142.157	112.116	172.649	0	0	138.027	225.639	72.3639	0	0	0	0	0	0	0	0	0	0	0	0	0	0	0	0
217.1/6.0 (12352)	217.099	6.01	12352	0	0	0	0	0	0	27.972	0	55.3004	32.731	0	34.0332	0	0	0	0	0	0	0	0	0	0	0	0	0	0	0	0	0	0	0	0	0	0	0	0	0	0	0	0	0	0	0	0	0	0
217.1/1.1 (12360)	217.103	1.12	12360	0	0	0	0	0	0	0	0	0	0	0	0	0	0	0	0	0	0	0	0	0	0	0	0	0	0	0	0	0	0	70.2237	127.987	108.944	92.2598	100.64	81.4574	54.9871	63.5251	64.8519	64.1109	56.2882	62.9573	50.3909	67.4593	60.123	82.1505
217.1/3.9 (12365)	217.104	3.91	12365	0	0	0	0	0	0	0	0	0	0	0	0	0	0	1.90869	0	0	0	0	0	0	0	0	0	0	0	0	0	0	0	0	0	0	0	0	0	0	0	4.95853	3.58402	0	0	4.01149	0	0	0
217.1/1.0 (12395)	217.118	1	12395	0	56.4637	0	0	67.866	0	0	0	0	0	0	0	0	0	0	92.8114	107.689	0	0	0	0	0	0	0	0	0	0	0	0	0	0	0	0	0	0	0	0	0	0	0	0	0	0	0	1.41118	0
217.1/1.1 (12396)	217.119	1.12	12396	195.457	128.863	188.996	236.229	117.405	224.331	249.959	134.002	106.725	222.611	245.241	130.373	227.52	184.907	181.117	273.353	247.717	219.571	144.001	211.046	163.901	256.007	168.955	181.441	95.9025	210.895	96.6607	376.571	506.207	468.795	0	0	0	0	0	0	0	0	0	0	0	0	0	0	0	0
217.2/1.1 (12403)	217.153	1.12	12403	688.234	318.129	383.979	934.757	350.487	448.183	5.33417	0	0	0	0	5.42407	10.5234	13.3881	10.3788	149.09	134.954	118.066	51.3496	39.2866	76.1034	39.5901	31.9624	32.5154	0	22.3177	0	483.748	730.769	568.598	0	0	0	0	0	0	0	0	0	1.59824	0	0	0	0	0	0
217.2/2.2 (12404)	217.154	2.25	12404	0	0	0	1114.16	11.1988	592.178	9.99353	0	9.65716	0	0	0	0	3.16691	0	0	2.0507	0	0	0	2.52622	0	0	0	0	7.16092	0.914139	58.0538	32.6214	0	0	0	0	0	0	0	0	0	0	0	0	0	0	0	0	0
217.2/2.1 (12406)	217.154	2.12	12406	815.753	753.432	30.4675	0	4.88951	101.795	0	0	0	0	0	3.5545	0	0	8.97812	17.3378	5.19025	0	0	0	1.70339	0	0	0	0	0	0	56.4299	178.623	16.9338	0	0	0	0	0	0	0	0	0	0	0	0	0	0	0	0
217.2/2.4 (12407)	217.154	2.42	12407	0	0	280.636	0	464.468	0	0	0	0	0	8.3035	0	17.2611	9.73687	0	437.327	0	0	1.22439	0	0	2.40114	0	0	0	0	2.96054	295.82	14.8322	0	0	0	0	0	0	0	0	0	0	0	0	0	0	0	0	0
217.2/2.6 (12405)	217.154	2.55	12405	6.21769	0	0	0	0	0	0	0	0	0	0	0	0	0	0	0	230.131	0	0	0	0	0	25.3313	4.36187	0	0	0	0	0	625.278	0	0	0	0	0	0	0	0	0	0	0	0	0	0	0	0
217.2/4.5 (12409)	217.155	4.45	12409	0	0	0	0	0	0	0	0	3.21974	0	0	0	2.89958	0	7.17823	0	0	0	4.17278	0	0	0	0	0	0	0	0	0	0	0	0	0	0	0	0	0	0	0	0	0	0	0	0	0	0	0
217.2/2.2 (12410)	217.157	2.25	12410	0	0	18.3082	0	0	0	0	0	0	0	1.76995	2.48728	0	0	1.38553	0	0	205.33	0	1.49369	0	0	0	0	0	0	0	0	0	0	0	0	0	0	0	0	0	0	0	0	0	1.59005	0	0	0	0
218.0/2.8 (12425)	218.048	2.81	12425	8.20633	0	0	0	0	0	6.59299	2.8069	0	0	0	0	0	0	35.8109	0	0	0	0	0	0	0	2.07839	0	10.4668	0	12.9733	0	3.4128	0	0	0	0	0	0	0	0	0	0	0	0	0	0	0	0	0
218.1/2.6 (12431)	218.079	2.63	12431	0	0	0	0	0	0	0	0	0	0	0	0	0	0	0	0	242.59	0	0	0	0	0	0	238.684	0	0	0	0	0	157.63	0	0	0	0	0	0	0	0	0	0	0	0	0	0	0	0
218.1/2.3 (12433)	218.08	2.27	12433	23.7657	0	1.01362	0	0	0	194.088	175.722	202.911	0	194.914	158.327	0	14.5279	364.477	102.002	0	0	0	0	0	64.5938	21.1979	0	43.5757	10.3572	91.0825	0	25.2343	0	0	0	0	0	0	0	0	0	0	0	0	0	0	0	0	0
218.1/2.5 (12432)	218.08	2.48	12432	0	0	6.52475	0	9.08831	0	0	0	0	8.27029	0	0	190.825	0	0	278.158	0	0	36.6553	15.0897	56.7915	0	0	0	1.97793	158.375	65.7101	0	0	0	0	0	0	0	0	0	0	0	0	0	0	0	0	0	0	0
218.1/2.8 (12435)	218.081	2.75	12435	0	0	0	0	0	0	0	0	0	0	0	0	0	0	0	0	0	0	253.087	0	0	28.9244	210.662	0	261.923	0	0	26.1231	4.09959	0	0	0	0	0	0	0	0	0	0	0	0	0	0	0	0	0
218.1/2.5 (12436)	218.083	2.49	12436	0	0	0	0	0	0	0	0	0	55.7287	0	0	0	85.8324	0	0	0	0	0	0	0	0	0	0	0	0	0	0	3.15658	19.0265	0	0	0	0	0	0	0	0	0	0	0	0	0	0	0	0
218.1/4.1 (12449)	218.102	4.1	12449	0	0	0	0	0	0	6.10263	6.10095	0	4.13012	5.42257	0	7.82627	0	0	0	0	0	0	0	0	0	0	0	0	0	0	0	0	0	0	0	0	0	0	0	0	0	0	0	0	0	0	0	0	0
218.1/4.5 (12452)	218.104	4.47	12452	0	0	0	0	0	0	45.626	0	0	0	21.0488	10.1663	24.1999	47.7127	0	0	0	0	0	0	0	0	0	0	0	0	0	0	0	0	0	0	0	0	0	0	0	0	0	0	0	0	0	0	0	0
218.1/1.1 (12453)	218.104	1.1	12453	0	0	0	0	0	0	24.8219	0	0	9.03691	0	23.04	0	17.2471	0	0	0	0	16.2132	0	16.5584	0	0	0	0	0	0	0	0	0	3.06189	8.61209	0	0	3.39214	0	0	0	0	5.22205	0	1.66583	0	2.81755	0	3.93463
218.1/1.1 (12461)	218.123	1.06	12461	0	0	0	0	15.2452	0	0	0	0	0	0	0	8.98766	0	0	0	0	0	0	0	0	6.81043	0	0	0	0	0	0	0	0	0	0	0	0	0	0	0	0	0	0	0	0	0	0	0	0
218.9/1.3 (12473)	218.927	1.26	12473	0	0	0	0	0	0	0	0	0	39.7599	0.791662	0	0	0	0	0	0	0	0	0	0	0	0	0	0	0	0	0	0	0	0	0	0	0	0	0	0	0	0	0	0	0	0	0	0	0
218.9/1.2 (12475)	218.929	1.2	12475	0	0	9.73397	171.934	8.98715	50.3744	0	0	0	0	0	6.18712	19.9094	13.941	0	0	0	0	0	0	0	0	0	0	0	0	0	0	75.6231	224.373	0	0.71312	0	0	0	0	1.28881	0	0.745711	0	0	0	0	0	0	0
219.1/3.5 (12481)	219.055	3.53	12481	0	0	0	0	0	0	0.91935	0	0	0	0.760556	0	0	0	0	0	0	0	0	0	0	0	0	0	0	0	0	0	0	0	0	0	0	0	0	0	0	0	0	0	0	0	3.07331	0	0	0
219.1/3.6 (12494)	219.096	3.56	12494	0	0	0	0	0	0	12.8809	22.384	13.6499	0	23.7018	21.6633	18.2155	25.6681	46.1677	123.85	99.5864	0	62.3898	45.1567	67.3719	55.2519	65.0784	65.808	90.4031	41.8325	82.1259	58.8841	150.602	99.4618	0	0	0	20.5781	7.71837	17.942	149.603	122.576	135.963	107.787	102.56	112.027	161.896	117.115	96.3891	82.9895
219.1/1.1 (12495)	219.096	1.06	12495	52.8787	32.4861	84.1352	0	60.8266	0	44.9971	0	45.7924	0	42.8451	35.3553	58.2015	75.6649	53.9981	34.4304	43.3574	0	43.4156	38.6254	81.5256	61.0753	85.7876	80.6002	64.5186	68.299	64.6637	71.3586	25.8517	0	0	0	0	0	0	0	0	0	0	0	0	0	0	0	0	0
219.1/3.8 (12496)	219.096	3.77	12496	0	0	0	0	0	0	0	23.6508	33.0433	0	12.5929	23.1914	22.105	27.3349	39.6918	12.7217	17.8823	0	21.5521	11.4049	19.1089	8.86258	15.7828	16.6614	22.0838	0	0	7.9079	22.0214	5.80604	0	0	0	0	0	0	42.9948	39.9343	64.7653	52.1963	32.0612	0	49.7853	30.0017	40.9522	68.4227
219.1/4.5 (12506)	219.112	4.54	12506	0	0	0	0	0	0	0	0	0	14.7125	0	0	19.7132	23.3079	0	0	0	0	29.8166	11.3075	0	0	0	0	0	16.0325	32.8853	0	0	1.78669	0	0	0	0	0	0	0	0	0	0	0	0	0	0	0	0
219.1/4.2 (12507)	219.112	4.17	12507	0	0	0	0	0	10.6427	0	0	0	20.1385	0	0	0	7.52768	0	0	0	8.7119	0	0	0	0	0	0	0	0	0	0	0	0	0	0	0	0	0	0	0	0	0	0	0	0	0	0	0	0
219.1/4.9 (12508)	219.112	4.87	12508	0	0	0	0	0	0	0	0	0	0	0	0	0	0	0	0	0	0	491.251	315.699	0	0	0	0	0	357.061	504.711	0	0	0	0	0	0	0	0	0	0	0	0.902751	0	1.19514	0	0	0	0	0
219.1/5.0 (12509)	219.112	5.02	12509	528.267	358.415	373.36	340.954	364.084	345.668	451.458	426.832	468.031	464.23	457.118	451.988	473.627	438.881	573.938	522.986	415.454	0	0	0	339.925	496.203	364.67	395.161	376.518	0	0	452.407	578.109	383.098	0	0	0	0	0	0	5.62077	9.61163	6.63311	3.78592	0	2.00883	8.05453	4.98562	3.07385	0
219.1/3.8 (12514)	219.131	3.76	12514	5.69827	0	0	0	3.16457	0	0	0	0	0	0	0	0	0	0	1.70695	0	0	0	0	0	0	0	0	0	0	0	0	0	0	0	0	0	0	0	0	0	0	0	0	0	0	0	0	0	0
219.1/1.4 (12521)	219.133	1.37	12521	183.734	0	155.738	245.446	0	35.9547	0	0	8.71764	0	2.70263	0	11.4205	0	17.921	39.1436	115.633	0	48.2452	0	12.8908	6.03659	7.23428	4.46717	0	0	3.42137	12.366	159.962	127.602	0	0	0	0	0	0	0	0	0	0	0	0	0	0	0	0
219.1/1.1 (12522)	219.133	1.12	12522	1012.2	1089.78	1219.18	1488.6	1209.37	1390.74	87.1785	67.7592	81.267	85.8581	66.2111	90.9884	114.091	140.046	98.0886	753.134	790.236	0	182.68	187.611	206.705	121.566	120.298	52.8554	42.3758	109.322	44.5565	1746.58	1431.76	1805.64	0	0	0	0	0	0	2.31969	3.24025	0	8.95274	4.93924	6.13985	4.13572	6.06777	1.85575	0
219.1/2.9 (12524)	219.133	2.92	12524	0	0	0	32.1625	609.377	0	0	19.7224	13.287	0	25.0451	33.8541	0	14.137	39.4769	0	0	0	139.351	0	0	0	0	0	0	1.33623	0	392.317	872.049	731.906	0	0	0	0	0	0	0	0	0	0	0	0	0	0	0	0
219.1/1.9 (12525)	219.133	1.86	12525	832.713	0	0	0	0	0	1.89502	0	3.40868	0	7.5814	1.79599	0	8.81085	0	0	0	0	0	0	0	5.03616	0	0	2.43253	1.14292	0	0	0	0	0	0	0	0	0	0	0	0	0	0	0	0	0	0	0	0
219.1/2.7 (12526)	219.134	2.74	12526	767.252	660.061	712.909	0	212.477	666.954	33.92	24.466	22.2094	0	20.2064	33.1287	60.9109	71.0103	145.294	277.677	100.1	85.1682	54.8815	9.31126	21.6875	2.61208	6.36409	0	2.3783	20.8387	69.6254	387.751	44.0202	0	0	0	0	0	0	0	0	0	0	1.04289	0	5.93661	8.16423	0	2.30401	0
219.1/2.5 (12527)	219.134	2.54	12527	0	0	0	244.543	0	1.58323	0	0	0	0	0	0	0	9.54365	0	0	0	60.7244	0	0	0	0	0	0	0	0	0	0	0	0	0	0	0	0	0	0	0	0	0	0	0	0	0	0	0	0
219.1/1.1 (12530)	219.136	1.1	12530	0	0	0	0	0	0	10.9871	0	0	0	0	4.48703	0	0	0	0	0	679.869	0	0	0	0	0	0	0	0	0	0	0	0	0	0	0	0	0	0	0	0	0	0	0	0	0	0	0	0
219.1/4.2 (12534)	219.148	4.2	12534	0	0	0	0	0	0	3.87941	0	0	0	0	1.53313	5.36805	0	26.0505	0	0	0	0	0	0	0	0	0	0	0	0	0	0	0	0	0	0	0	0	0	0	0	0	0	0	0	0	0	0	0
219.2/13.5 (12542)	219.192	13.5	12542	0	0	21.6213	9.75123	0	11.9143	0	0	0	0	0	0	46.6586	0	0	0	24.4134	0	0	25.4966	0	0	39.6635	25.6681	0	0	0	0	0	0	0	66.7074	0	0	0	0	46.1675	0	0	48.5607	46.9394	49.7473	51.5796	0	0	0
219.2/13.5 (12543)	219.195	13.53	12543	61.8788	51.2597	0	0	37.4371	0	50.6817	55.4961	47.5096	49.9251	61.9511	43.6758	0	24.2204	26.3431	37.0802	0	51.7852	0	0	38.8844	2.59508	0	0	26.6798	10.7444	0	27.852	10.7053	13.7867	14.7674	0	50.8508	52.13	40.9589	27.5096	0	43.513	50.2684	0	0	0	0	55.336	53.1861	47.1294
220.0/3.4 (12555)	220.039	3.43	12555	0	0	0	0	0	0	0	0	0	0	0	0	0	0	0	0	0	0	0	0	0	0	0	0	0	0	0	0	0	0	0	0	0	0	0	0	0	0	15.9117	0	0	1.81414	0	0	0	0
220.0/3.5 (12557)	220.042	3.53	12557	0	0	0	0	0	0	0	0	0	0	0	7.1422	0	0	0	0	17.4741	0	0	0	0	13.009	0	0	0	8.53319	16.047	0	12.5532	27.6386	0	0	0	6.04977	0.540284	6.03886	42.2878	0	17.6143	0	21.7567	35.7306	51.8034	16.0401	33.5149	25.6023
220.1/2.5 (12562)	220.061	2.46	12562	0	0	0	0	0	0	13.3073	25.0701	15.8256	0	13.0206	0	4.44683	1.92062	4.50872	0	0	0	0	0	0	0	0	0	0	0	0	0	0	0	0	0	0	0	0	0	0	0	0	0	0	0	0	0	0	0
220.1/1.2 (12565)	220.063	1.22	12565	0	0	0	0	0	0	30.6536	40.0826	37.4327	0	8.10339	5.66369	10.2166	50.7703	4.1675	0	0	0	0	0	0	0	0	0	0	0	0	0	0	0	0	0	0	0	0	0	0	0	0	10.6093	7.82486	9.04814	15.6885	0	8.76689	0
220.1/3.2 (12571)	220.082	3.21	12571	19.6532	0	0	0	0	0	8.59073	0	0	0	0	0	0	0	0	9.8129	0	0	0	0	0	0	0	0	0	0	0	0	0	0	0	0	0	0	0	0	0	0	0	0	0	0	0	0	0	0
220.1/3.1 (12581)	220.117	3.07	12581	0	0	844.132	0	956.201	0	0	0	0	0	0	0	0	0	0	0	1249.97	0	0	212.021	356.369	0	513.272	493.704	357.629	0	0	907.86	691.295	497.742	0	0	0	0	0	0	0	0	0	0	0	0	0	0	0	0
220.1/2.3 (12585)	220.117	2.29	12585	617.29	0	0	0	0	0	0	0	0	0	0	0	0	0	578.658	0	0	0	67.7201	0	0	0	0	0	0	0	37.9655	0	0	0	0	0	0	0	0	0	0	0	0	0	0	0	0	0	0	0
220.1/1.6 (12586)	220.117	1.63	12586	0	0	0	0	0	0	0	0	0	0	0	0	0	0	0	0	352.518	0	0	0	0	0	66.162	0	0	0	0	349.177	0	0	0	0	0	0	0	0	0	0	0	0	0	0	0	0	0	0
220.1/1.9 (12587)	220.118	1.92	12587	0	0	0	39.4436	0	0	0	0	0	0	0	0	0	0	0	1021.52	99.5239	0	0	0	0	57.963	133.013	60.2321	268.96	13.9613	2.83532	54.0951	0	0	0	0	0	0	0	0	0	0	0	0	0	0	0	0	0	0
220.1/2.6 (12588)	220.118	2.59	12588	0	53.6552	0	0	0	26.9359	17.0962	0	60.2776	0	72.3921	36.6426	8.50752	45.5444	0	0	0	0	41.9538	0	0.931207	0	0	0	0	0	0	4.28207	0	0	0	0	0	0	0	0	0	0	0	0	0	0	0	0	0	0
220.1/1.8 (12589)	220.118	1.81	12589	0	0	0	177.762	0	0	4.55095	0	0	0	0	0	0	0	0	0	0	0	0	0	99.8167	0	0	0	0	14.7229	0	194.239	0	0	0	0	0	0	0	0	0	0	0	0	0	0	0	0	0	0
220.1/2.9 (12590)	220.118	2.94	12590	894.862	1263.06	0	0	0	590.065	1786.16	1821.33	1913.44	1852.6	1775.04	1712.97	2175.36	938.143	2572.61	993.759	0	0	261.455	0	0	0	29.842	0	0	325.641	174.388	0	0	0	0	0	0	0	0	0	177.733	225.701	183.292	0	0	0	0	0	0	0
220.1/1.1 (12592)	220.128	1.11	12592	0	0	0	0	0	0	0	0	0	0	0	0	0	0	0	0	0	0	0	0	0	0	0	0	0	0	0	0	0	0	0	0	0	0	0	0	0	0	0	22.6442	14.3644	11.7043	5.52185	4.89811	8.04515	0
221.1/3.3 (12611)	221.076	3.34	12611	0	0	0	0	0	0	0	0	0	0	0	0	0	0	0	0	0	0	0	0	0	0	0	0	0	0	0	0	0	0	0	0	0	0	0	0	32.5896	0	169.901	0	0	95.3193	0	0	0	0
221.1/6.3 (12612)	221.077	6.31	12612	0	0	0	0	0	0	0	0	0	0	0	0	0	0	2.14629	0	0	0	0	0	0	0	0	0	0	0	0	0	0	0	0	0	0	0	0	0	26.2233	69.5685	276.835	21.0028	0	63.0126	1.08417	0	0	0
221.1/4.8 (12613)	221.077	4.79	12613	0	0	0	0	0	0	0	0	0	0	0	0	0	0	0	0	0	0	0	0	0	0	0	0	0	0	0	0	0	0	0	0	0	0	0	0	118.339	228.746	504.618	97.2736	21.2396	227.75	15.2935	2.73929	15.16	0
221.1/3.1 (12614)	221.077	3.06	12614	0	0	0	0	0	0	0	0	0	0	0	0	0	0	0	0	0	0	0	0	0	0	0	0	0	0	0	0	0	0	0	0	0	0	0	0	1.39639	17.269	266.005	0.731315	0	3.13474	0	0	0	0
221.1/5.8 (12616)	221.078	5.85	12616	0	0	0	0	0	0	0	0	0	0	0	0	0	0	0	0	0	0	0	0	0	0	0.565695	0	0	0	0	0	0	0	0	0	0	0	0	0	28.7978	49.2521	54.5973	12.6357	3.95355	5.55451	19.3482	0	10.1479	0
221.1/3.2 (12617)	221.079	3.21	12617	0	0	0	0	0	0	0	0	0	0	0	0	0	0	0	0	0	0	0	0	0	0	0	0	0	0	0	0	0	0	0	0	0	0	0	0	3.88526	0	81.9144	0	0	4.56962	0	0	0	0
221.1/1.5 (12619)	221.09	1.51	12619	143.551	53.0822	53.9801	147.828	38.2832	27.0479	99.7794	51.2346	82.8778	0	86.4894	101.192	103.592	90.5121	86.0744	81.1571	113.856	0	136.762	65.8584	66.4502	136.143	108.655	109.394	111.445	109.34	182.573	106.359	114.918	98.7268	0	0	0	0	0	0	0	0	0	0	0	0	0	0	0	0
221.1/2.4 (12620)	221.09	2.43	12620	0	0	0	490.22	3.83518	19.5208	53.1369	0	0	0	0	0	0	0	0	0	0	0	0	0	0	0	0	0	0	0	0	0	0	0	0	0	0	0	0	0	0	0	0	0	0	0	0	0	0	0
221.1/8.8 (12621)	221.091	8.85	12621	0	0	0	0	0	0	0	0	0	0	0	0	0	0	0	0	0	0	30.5103	78.4502	76.5755	52.8718	60.1692	68.7857	0	0	0	0	0	0	0	0	0	0	0	0	0	0	0	0	0	0	0	0	0	0
221.1/2.6 (12623)	221.091	2.6	12623	0	200.311	0	0	0	234.42	129.479	173.516	226.493	0	205.65	211.844	5.84071	0	308.577	6.61956	2.7126	0	0	0	0	2.67638	5.60365	0	11.2591	2.06469	0	0	2.25665	0	0	0	0	0	0	0	0	0	0	0	0	0	0	0	0	0
221.1/1.8 (12624)	221.091	1.79	12624	0	68.142	144.725	215.088	17.8033	0	0	0	258.439	0	0	194.536	0	0	325.489	0	0	0	426.301	148.885	211.465	451.795	0	0	0	235.745	504.388	0	320.469	0	0	0	0	0	0	0	0	0	0	0	0	0	0	0	0	0
221.1/1.9 (12625)	221.091	1.89	12625	0	0	0	0	62.7475	0	149.616	190.408	0	0	271.762	0	212.6	0	0	204.592	213.076	0	0	0	0	0	240.003	268.307	265.531	0	0	214.692	0	233.24	0	0	0	0	0	0	0	0	0	0	0	0	0	0	0	0
221.1/3.1 (12626)	221.092	3.09	12626	0	6.49323	0	31.9023	0	0	0	0	0	0	0	0	0	0	49.7484	0	0	0	0	0	0	253.881	0	0	5.78284	0	0	0	19.2372	0	0	0	0	0	0	0	0	0	0	0	0	0	0	0	0	0
221.1/1.1 (12627)	221.092	1.12	12627	185.478	198.283	223.169	244.948	229.033	283.966	397.177	327.938	377.822	341.945	364.307	375.363	321.85	411.529	299.12	133.493	164.942	0	219.883	214.708	219.554	224.37	241.149	244.89	306.462	247.187	271.012	208.08	230.515	208.479	0	0	0	0	0	0	19.994	19.7292	12.951	0	1.36023	1.4463	0	0	0	0
221.1/2.9 (12629)	221.093	2.86	12629	0	0	0	0	0	0	0	0	0	0	0	0	0	0	0	0	128.641	0	263.921	0	0	0	182.598	221.182	200.865	0	0	81.9055	91.6299	27.9219	0	0	0	0	0	0	0	0	0	0	0	0	0	0	0	0
221.1/1.8 (12630)	221.094	1.82	12630	0	0	0	0	0	99.7272	0	0	0	240.88	0	0	0	279.48	0	0	0	105.947	0	0	0	0	0	0	0	0	0	0	0	0	0	0	0	0	0	0	0	0	0	0	0	0	0	0	0	0
221.1/2.6 (12648)	221.123	2.59	12648	0	1.64059	0	0	0	0	0	0	2.95093	0	2.42186	0	0	0	0	6.62108	0	32.0556	0.938693	0	0	0	0	0	0	0	0	0	0	0	0	0	0	0	0	0	0	0	0	0	0	0	0	0	0	0
221.1/5.3 (12652)	221.128	5.33	12652	0	0	0	0	0	0	0	0	0	0	0	0	0	0	0	0	0	0	22.9559	23.6497	44.3603	46.6979	17.5795	23.8896	0	0	0	0	0	0	0	0	0	0	0	0	0	0	0	0	0	0	0	0	0	0
221.2/12.9 (12657)	221.19	12.93	12657	24.725	7.40923	7.20266	2.34626	5.55598	0	17.2124	19.7744	16.2552	9.31565	16.2813	17.7234	9.61088	1.91903	4.66319	10.6096	5.81067	0	1.37922	0	4.45218	1.31959	7.33492	0	2.95095	0	0	0	0	0	6.27461	18.381	18.9256	15.8456	11.8253	0	15.6612	14.2588	14.1946	13.5872	5.73394	16.9747	16.6318	13.8369	17.7109	15.3015
221.9/2.1 (12660)	221.946	2.11	12660	0	0	0	0	0	0	8.70882	3.02415	4.13191	0	13.3838	7.68991	0	0	10.0936	0	0	0	0	0	0	0	0	0	0	0	0	0	0	0	0	0	0	0	0	0	0	0	0	0	0	0	0	0	0	0
222.1/1.1 (12665)	222.075	1.15	12665	0	0	0	0	0	0	2.99475	0	0	0	0	0	0	0	0	0	8.36363	0	0	0	0	0	0	4.02561	0	0	0	0	10.48	10.2507	0	0	0	0	0	0	0	0	0	0	0	0	0	0	0	0
222.1/4.6 (12669)	222.079	4.56	12669	0	0	0	0	0	0	0	0	6.21208	0	0	24.6784	9.09912	19.5322	5.15798	0	0	0	0	0	0	0	0	0	0	0	0	0	0	0	0	0	0	0	0	0	0	0	0	0	0	0	0	0	0	0
222.1/7.8 (12688)	222.112	7.8	12688	0	0	0	0	0	0	0	0	0	0	0	0	1.10921	0	0	0	1.49066	0	25.6485	12.4562	0	19.1441	0	0	0	30.3015	77.3811	0	0	0	0	0	0	0	0	0	0	0	0	0	0	0	0	0	0	0
222.1/8.8 (12696)	222.144	8.83	12696	44.1319	35.8059	45.9152	24.1769	0	11.3049	0	0	39.2221	0	38.3276	32.798	20.8376	0	8.07467	35.0618	21.859	0	5.63045	8.60096	24.5608	3.26898	36.6431	12.5921	17.3699	4.37215	5.28683	37.241	19.23	0	125.288	158.884	156.7	0	96.9157	99.1037	117.403	104.438	123.104	122.889	107.079	120.697	118.13	177.271	126.507	116.544
222.1/8.8 (12699)	222.147	8.84	12699	0	0	0	0	32.5923	0	19.437	28.7666	0	17.8356	0	0	0	0	0	0	0	38.7621	0	0	0	0	0	0	0	0	0	0	0	29.6032	0	0	0	115.405	0	0	0	0	0	0	0	0	0	0	0	0
223.1/13.5 (12720)	223.063	13.46	12720	0	37.4961	10.8097	0	27.3555	1.29879	37.8904	42.3075	42.4534	39.6852	53.3389	40.3522	32.3428	10.8945	16.8856	26.8936	16.4833	0	0	11.7926	20.8147	0	25.4025	10.9345	13.4878	7.10783	0	11.9124	3.92595	7.00636	7.38108	50.67	38.4156	43.9257	27.5757	16.2776	33.0212	35.0472	31.343	34.1777	32.3112	36.0359	35.7168	42.8457	36.2174	33.2809
223.1/4.5 (12725)	223.092	4.53	12725	0	0	0	0	0	0	0	0	0	0	0	0	0	0	0	0	0	0	0	0	0	0	0	0	0	0	0	0	0	0	0	0	0	0	0	0	41.902	75.9238	193.285	204.975	0	463.798	0	0	1.57956	0
223.1/5.6 (12727)	223.094	5.6	12727	0	0	0	0	0	0	0	0	0	0	0	0	0	0	0	0	0	0	0	0	0	0	0	0	0	0	0	0	0	0	0	0	0	0	0	0	5.45116	7.42525	16.7353	0	0	12.3941	0	0	0	0
223.1/2.7 (12736)	223.107	2.7	12736	23.2823	0	30.3263	2119.47	11.1216	0	0	0	0	0.384832	0	0	0	80.3222	0	0	20.7986	0	0	0	6.5423	0	0	0	0	0	0	0	0	10.9975	0	0	0	0	0	0	0	0	0	0	0	0	0	0	0	0
223.1/2.5 (12738)	223.107	2.49	12738	0	4.9263	0	52.2176	0	0	3.59821	0	0	0	0	0	0	0	0	0	0	0	0	0	0	0	0	0	0	0	0	0	0	0	0	0	0	0	0	0	0	0	0	0	0	0	0	0	0	0
223.1/2.9 (12740)	223.107	2.93	12740	1767.65	826.131	1180.39	0	1272.28	1386.01	0	0	9.98791	9.15243	9.80427	5.11977	19.146	0	19.5037	631.172	315.442	0	254.339	45.1607	75.8847	0	43.0347	10.1482	14.1126	9.05506	73.5739	0	0	1254.07	0	0	0	0	0	0	0	0	0	0	0	1.0012	0	0	0	0
223.1/3.4 (12742)	223.107	3.4	12742	0	0	141.761	0	168.75	0	14.5467	0	5.06901	0	0	0	0	0	24.4877	327.438	271.676	0	119.191	44.7482	76.0059	0	90.4234	31.0433	0	0	0	319.085	326.39	318.527	0	0	0	0	0	0	0	0	0	0	0	0	0	0	0	0
223.1/3.1 (12743)	223.107	3.07	12743	0	0	0	283.871	0	0	0	0	0	0	0	1.4706	0	4.14997	0	0	0	0	0	0	0	0	21.8547	0	0	0	0	894.583	1771.45	0	0	0	0	0	0	0	0	0	0	0	0	0	0	0	0	0
223.1/3.2 (12744)	223.107	3.22	12744	12.1679	189.416	0	0	0	162.389	0	0	0	0	5.66432	22.6288	0	21.7949	0	0	0	208.39	0	0	0	228.972	0	0	0	45.266	19.7978	0	0	0	0	0	0	0	0	0	0	0	0	0	0	0	0	0	0	0
224.1/12.1 (12780)	224.095	12.12	12780	21.0081	27.0514	15.494	73.0545	13.2907	16.039	0	0	0	0	0	0	0	0	0	29.5021	17.5175	21.7902	0	0	0	0	0	0	0	0	0	24.1786	29.8234	16.1754	0	0	0	0	0	0	0	0	0	0	0	0	0	0	0	0
224.1/4.1 (12789)	224.125	4.11	12789	0	0	0	0	0	0	0	0	0	0	0	0	0	0	0	0	0	0	0	8.82926	12.5522	0	0	0	4.43198	0	0	0	0	0	0	0	0	0	0	0	0	0	0	0	0	0	0	0	0	0
224.1/3.9 (12790)	224.126	3.92	12790	0	0	0	0	0	0	0	0	0	0	0	0	0	0	0	0	0	0	14.0869	0	0	0	0	0	0	10.0765	21.7482	0	0	0	0	0	0	0	0	0	0	0	0	1.02081	0	0	0	0	0	0
224.1/1.1 (12791)	224.137	1.14	12791	0	0	0	0	0	0	0	0	0	0	0	0	0	0	0	0	0	0	0	58.4089	56.7214	0	0	39.3355	0	0	0	0	0	0	0	0	0	0	0	0	0	0	0	0	0	0	0	0	0	0
224.1/2.0 (12792)	224.139	1.95	12792	0	0	0	0	0	0	0	0	0	0	0	0	0	0	0	0	0	0	44.614	16.6007	41.8797	107.292	20.2621	33.9394	1.37358	0	21.0051	0	0	0	0	0	0	0	0	0	0	0	0	0	0	0	0	0	0	0
224.1/1.2 (12794)	224.139	1.2	12794	0	0	0	0	0	0	0	0	0	0	0	0	0	0	0	0	0	0	32.3016	0	0	51.7352	32.255	0	0	0	17.2596	0	0	0	0	0	0	0	0	0	0	0	0	0	0	0	0	0	0	0
225.1/1.1 (12805)	225.082	1.05	12805	21.5656	0	0	0	0	14.9871	0	0	0	0	14.0635	11.4086	10.501	0	0	53.2369	30.6892	0	16.7315	0	0	17.827	0	7.97637	0	17.4204	0	0	44.2404	0	0	0	0	0	0	0	0	0	0	0	0	0	0	0	0	0
225.1/3.4 (12806)	225.084	3.43	12806	0	0	0	0	0	0	0	46.1816	0	0	0	0	65.16	0	0	0	0	0	0	2.40179	0	0	0	0	0	0	0	0	0	0	0	0	0	0	0	0	0	0	0	0	0	0	0	0	0	0
225.1/1.1 (12807)	225.085	1.1	12807	0	24.5462	0	0	0	0	9.51397	15.6149	0	0	0	0	0	11.614	5.50255	0	0	42.5716	0	0	0	0	16.0042	0	0	0	0	41.6307	0	0	0	0	0	0	0	0	1.51225	0	0	1.80877	0	0	0	0	0	0
225.1/3.8 (12809)	225.088	3.82	12809	0	2.43761	0	0	0	0	88.0145	0	0	67.6312	4.21418	3.10553	0	125.457	0	0	0	0	0	5.19713	0	3.96281	0	0	0	1.88807	0	0	0	0	0	0	0	0	0	0	0	0	0	0	0	0	0	0	0	0
225.1/3.4 (12810)	225.089	3.43	12810	0	0	0	0	0	0	53.2105	0	45.718	35.5583	43.4272	53.51	0	82.973	0	0	0	0	0	0	0	0	0	0	0	0	2.50095	0	0	0	0	0	0	0	0	0	0	0	0	0	0	0	0	0	0	0
225.1/1.1 (12819)	225.12	1.14	12819	0	6.16067	13.7854	0	23.8708	15.284	0	0	0	0	0	0	0	0	0	0	0	0	0	0	0	0	0	0	0	0	0	18.3604	0	26.6456	0	0	0	0	0	0	0	0	0	0.689887	0	0	0	2.18913	0	0
225.1/4.4 (12820)	225.12	4.43	12820	0	0	0	0	0	0	0	51.7608	0	0	0	0	53.7224	0	5.5197	0	0	0	0	36.7629	0	0	0	0	0	0	0	0	0	0	0	0	0	0	0	0	0	0	0	0	0	0	0	0	0	0
225.1/4.3 (12822)	225.122	4.28	12822	0	0	43.2094	10.6094	13.8178	0	6.16042	43.2609	62.9752	0	37.3547	50.837	10.6877	0	0	0	43.7228	3.0891	0	25.674	57.4936	0	76.2012	0	88.8557	0	0	39.4235	0	0	0	0	0	0	0	0	0	0	0	0	0	0	0	0	0	0
225.1/3.9 (12825)	225.122	3.85	12825	139.259	0	9.11808	0	0	0	0	0	0	0	0	0	0	0	181.638	140.004	23.0193	0	90.2901	0	11.6165	107.815	0	60.1265	103.802	0	5.32468	116.738	192.691	15.542	0	0	0	0	0	0	0	0	0	0	0	0	0	0	0	0
225.1/4.1 (12827)	225.123	4.07	12827	0	16.7822	15.4676	0	11.3988	15.6135	22.5589	5.36107	0	10.3104	9.77368	0	23.9824	28.904	0	0	6.84743	0	66.9264	14.4755	5.39712	0	0	48.4566	0	21.9744	63.4934	0	5.67217	0	0	0	0	0	0	0	0	0	0	0	0	0	0	0	0	0
225.1/3.7 (12828)	225.123	3.68	12828	0	55.6484	67.6323	57.3848	60.1645	51.3564	47.8598	49.7394	90.0427	0	38.6369	55.7564	40.4344	53.5662	0	0	90.7933	0	0	53.2949	34.1996	0	56.7591	0.532508	0	49.6113	114.975	5.13142	0	36.9046	0	0	0	0	0	0	0	0	0	0	0	0	0	0	0	0
225.1/4.5 (12830)	225.123	4.5	12830	199.848	97.5566	26.4621	0	64.8396	34.1703	0	0	85.8226	70.3314	73.0798	66.346	0	0	170.31	137.325	123.8	80.3711	0	0	71.9243	96.6614	84.3048	65.3764	97.853	0	0	129.756	123.577	75.462	0	0	0	0	0	0	0	0	0	0	0	0	0	0	0	0
225.1/4.4 (12837)	225.124	4.39	12837	60.0639	0	0	45.9381	0	0	59.076	0	0	0	0	0	0	59.1089	76.7143	85.4469	0	0	90.1939	0	0	72.393	0	5.81241	0	52.0952	91.0643	0	73.5743	0	0	0	0	0	0	0	0	0	0	0	0	0	0	0	0	0
225.1/3.8 (12839)	225.125	3.78	12839	0	0	0	0	0	0	0	0	0	83.0083	0	0	0	0	0	0	0	48.0625	0	0	0	0	16.3162	0	0	0	0	0	0	0	0	0	0	0	0	0	0	0	0	0	0	0	0	0	0	0
226.0/1.2 (12864)	225.976	1.23	12864	0	0	0	0	0	0	0	0	0	7.97004	0	0	5.27234	61.6488	0	0	0	0	1.87072	0	0	0	0	0	0	1.47069	0	0	0	0	0	0	0	0	0	0	0	0	0	0	0	0	0	0	0	0
226.1/1.0 (12876)	226.08	1.02	12876	0	0	0	0	11.0177	5.34146	0	29.1498	23.3363	0	22.511	0	22.3582	13.6832	0	0	23.8488	10.8744	0	0	0	0	28.0504	0	0	0	0	10.6102	0	0	0	0	0	0	0	0	0	0	0	0	0	0	0	0	0	0
226.1/8.6 (12878)	226.085	8.55	12878	0	0	0	0	0	0	18.8589	33.997	26.9683	0	31.3491	28.3009	23.4304	0	54.2876	170.219	110.315	0	15.2602	46.4444	42.9072	31.0949	46.0325	40.7277	2.65443	24.9969	7.55789	128.865	151.601	69.7545	0	0	0	0	0	0	70.0512	49.9466	71.8419	17.2103	26.8811	27.2862	26.8483	21.5684	25.9224	164.146
226.1/8.5 (12880)	226.089	8.52	12880	0	0	0	0	0	0	0	0	0	28.8252	0	0	0	7.33925	0	0	0	127.82	0	0	0	0	0	0	0	0	0	0	0	0	0	0	0	0	0	0	0	0	0	0	0	0	0	0	0	0
226.1/1.1 (12882)	226.103	1.13	12882	0	0	0	0	0	0	0	0	0	0	0	0	0	0	0	0	0	0	0	0	0	0	0	0	0	0	0	0	0	0	0	0	0	0	0	0	0	0	4.71576	4.28064	3.76392	4.68268	23.0017	7.12624	10.456	0
226.1/3.9 (12885)	226.106	3.87	12885	0	0	0	0	0	0	0	0	5.37759	0	0	0	0	0	33.067	21.7974	11.9961	0	15.1119	0	0	10.9047	10.1943	0	6.59583	0	11.3189	0	3.98491	0	0	0	0	0	0	0	0	0	0	0	0	0	0	0	0	0
226.2/1.1 (12904)	226.154	1.15	12904	987.482	761.906	786.501	1264.23	853.937	0	1041.23	922.021	908.271	960.106	834.638	936.526	833.56	1059.65	1037.53	1062.92	929.19	0	1088.19	1001.01	980.692	1202.72	1145.08	1095.51	1027.39	1051.64	1194.67	1009.13	1024.69	825.419	0	0	0	0	0	0	12.3379	13.9865	9.00158	8.22351	6.99215	3.80551	16.0288	9.04621	11.6904	0
226.2/1.4 (12905)	226.154	1.43	12905	756.796	189.436	600.865	1204.86	165.768	453.236	0	0	250.244	116.753	0	208.672	0	425.047	594.065	0	0	121.258	0	198.172	358.962	0	0	0	0	383.663	1138.46	693.112	1096.7	0	0	0	0	0	0	0	0.63894	0	0	0	0	0	1.83053	0	0	0
226.2/1.6 (12906)	226.155	1.58	12906	0	0	0	0	0	0	255.717	229.743	0	0	262.561	0	296.303	0	0	536.775	602.313	0	1171.28	0	0	1087.59	526.382	566.35	484.095	0	0	0	0	842.59	0	0	0	0	0	0	0	0	0	0	0	0	0	0	0	0
226.2/12.4 (12914)	226.18	12.42	12914	91.3731	66.2686	59.705	15.9488	34.9517	30.2068	66.4789	68.6068	88.0802	0	102.273	98.473	49.8875	65.3976	71.5852	56.6255	67.0879	0	26.8976	43.6059	40.5794	34.1409	86.173	50.4988	37.5639	27.032	33.312	29.6547	26.9154	30.1486	44.2906	96.5286	90.6707	59.0307	66.3486	67.5721	60.4076	61.5751	84.0898	86.0317	50.5277	79.0194	85.1964	108.952	88.1445	64.4253
226.2/10.1 (12915)	226.18	10.13	12915	469.072	378.491	310.95	169.27	263.527	188.431	361.764	669.356	442.972	274.22	711.892	593.507	305.447	168.398	277.168	318.513	306.136	0	101.72	171.306	253.68	116.876	355.623	205.428	236.706	152.025	110.727	274.304	176.123	218.482	330.547	847.975	487.091	452.349	316.912	331.399	469.638	482.87	484.907	453.725	417.214	446.604	690.495	512.062	706.809	357.691
226.2/12.4 (12919)	226.183	12.41	12919	0	0	0	4.86162	0	0	0	0	0	81.4736	0	0	0	0	0	0	0	95.2642	0	0	0	0	0	0	0	0	0	0	0	0	0	0	0	0	0	0	0	0	0	0	0	0	0	0	0	0
227.0/2.6 (12927)	226.95	2.59	12927	0	0	0	0	0	0	0	0	0	0	0	0	0	0	0	0	2.55415	0	0	4.28496	0	0	0	0	0	0	0	0	0	0	0	0	0	0	0	0	0	0	0	0	0	0	0	0	0.691195	0
227.0/1.2 (12938)	227.014	1.17	12938	0	0	0	0	0	0	0	0	0	0	0	0	0	0	0	0	0	0	0	70.6104	112.07	0	0	92.8851	0	0	0	0	0	0	0	0	0	0	0	0	0	0	0	0	0	0	0	0	0	0
227.0/1.5 (12939)	227.014	1.47	12939	0	0	0	0	0	0	0	0	0	0	0	0	0	0	0	0	0	0	0	110.027	196.438	4.07121	0	167.148	14.0823	78.761	47.2465	0	0	0	0	0	0	0	0	0	0	0	0	0	0	0	0	0	0	0
227.0/1.6 (12940)	227.015	1.58	12940	0	0	0	0	0	0	0	0	0	0	0	0	0	0	0	0	0	0	66.1811	0	0	12.1819	109.641	0	0	0	0	0	0	0	0	0	0	0	0	0	0	0	0	0	0	0	0	0	0	0
227.1/1.1 (12948)	227.064	1.05	12948	0	20.1133	0	0	10.8663	0	42.077	36.1715	26.0274	0	5.33627	47.1353	5.59124	0	32.4842	27.7008	20.5024	0	0	0	11.3661	12.9556	0	52.8517	65.9663	41.4207	48.2305	37.4574	0	6.33713	0	0	0	0	0	0	3.9812	2.21239	1.81882	0.89027	0	0	0	0	1.79117	0
227.1/1.1 (12949)	227.067	1.13	12949	0	0	0	0	0	0	0	0	6.07405	0	0	0	34.5228	0	0	0	0	10.1534	21.7259	0	0	28.8685	0	0	0	0	0	0	0	0	0	0	0	0	0	0	0	0	0	0	0	1.29766	3.34304	0	0	0
227.1/10.7 (12951)	227.069	10.68	12951	0	0	0	0	0	0	0	0	0	0	0	0	0	0	0	0	0	0	0	0	0	0	0	0	0	0	0	0	0	0	0	0	0	0	0	0	8.52711	3.59518	3.83872	11.5503	14.5001	11.2809	78.268	21.471	46.6687	1.8307
227.1/1.8 (12957)	227.077	1.83	12957	0	0	0	0	0	0.0638207	0	0	0	0	0	0	0	0	0	0	0	0	0	29.8015	0	0	0	0	0	8.46622	0	0	0	0	0	0	0	0	0	0	0	0	0	0	0	0	0	0	0	0
227.1/3.3 (12958)	227.077	3.31	12958	0	0	20.8641	0	0	71.0797	0	0	14.8459	0	0	0	0	0	0	0	0	0	0	58.2165	11.1417	0	0	24.2712	0	0	0	38.1943	38.2656	137.391	0	0	0	0	0	0	0	0	0	0	0	0	0	0	0	0
227.1/2.2 (12960)	227.078	2.24	12960	0	0	4.5058	0	104.157	0	0	0	0	0	0	0	5.28232	0	0	0	0	0	0	0	0	0	0	2.44196	0	0	0	0	0	0	0	0	0	0	0	0	0	0	0	0	0	0	0	0	0	0
227.1/2.9 (12961)	227.078	2.92	12961	0	0	0	0	0	0	6.16484	0	0	0	0	6.11316	0	0	0	144.911	0	0	137.668	0	68.6829	0	148.835	53.087	0	0	0	156.124	0	0	0	0	0	0	0	0	0	0	0	0	0	0	0	0	0	0
227.1/2.6 (12963)	227.078	2.63	12963	0	107.213	8.8174	0	0	0	200.789	174.288	223.545	0	197.793	61.3906	24.2936	0	0	0	0	0	0	0	0	0	0	18.6133	0	97.0999	0	0	0	0	0	0	0	0	0	0	0	0	0	0	0	0	0	0	0	0
227.1/3.1 (12962)	227.078	3.15	12962	148.481	13.8671	19.7416	16.4495	16.036	0	45.1983	65.8784	16.2863	10.2823	0	87.469	114.033	0	225.272	0	0	18.3266	0	0	15.532	110.522	0	34.1869	0	81.2306	0	0	130.369	0	0	0	0	0	0	0	0	0	0	0	0	0	0	0	0	0
227.1/2.2 (12966)	227.081	2.23	12966	0	0	0	0	0	67.8828	0	0	0	14.6747	0	0	7.51851	0	0	0	0	221.992	0	0	0	0	0	0	0	0	0	0	0	4.94195	0	0	0	0	0	0	0	0	0	0	0	0	0	0	0	0
227.1/1.5 (12974)	227.101	1.53	12974	68.023	0	0	6.95236	0	0	0	0	0	0	0	0	0	0	0	0	68.3102	0	0	0	0	0	0	87.207	1098.66	64.8921	0	0	0	0	0	0	0	0	0	0	0	0	0	0	0	0	0	0	0	0
227.1/4.0 (12976)	227.101	4.03	12976	4.19298	0	2.56335	0	0	0	13.0183	0	0	0	8.08883	0	0	0	20.2556	14.5467	10.8855	0	0	0	23.1387	26.9814	28.1399	23.4932	30.9485	0	0	17.3343	1.9897	0	0	0	0	0	0	0	0	0	0	0	0	0	0	0	0	0
227.1/1.2 (12979)	227.102	1.18	12979	195.657	525.55	641.059	570.173	735.74	627.781	1117.74	769.333	805.296	0	760.462	800.437	534.138	731.776	185.058	506.206	1045.65	0	193.657	628.134	791.948	243.156	721.692	960.918	187.343	778.383	146.399	602.613	668.539	1109.05	0	0	0	0	0	0	36.7264	29.8831	25.4565	27.8309	32.0035	18.6944	53.9624	23.1654	26.0599	0
227.1/1.7 (12980)	227.102	1.69	12980	0	0	0	0	0	0	0	0	0	1.26966	0	0	0	0	0	0	0	0	669.044	0	0	0	0	0	0	0	0	0	510.753	0	0	0	0	0	0	0	0	0	0	0	0	0	0	0	0	0
227.1/1.9 (12981)	227.102	1.88	12981	1222.35	0	0	9.9015	0	0	0	0	0	0	0	0	0	0	1297.56	0	0	0	0	0	0	885.57	0	0	0	0	1033.51	0	134.23	0	0	0	0	0	0	0	0	0	0	0	0	0	0	0	0	0
227.1/2.9 (12982)	227.102	2.92	12982	558.506	596.804	588.037	0	581.299	374.246	1169.32	1221.87	1185.09	948.461	1288.65	998.635	1390.51	568.059	1612.2	943.459	1050.22	0	944.627	1279.43	1156.09	5.10319	1045.64	1582.87	1332.39	1229.91	1465.98	803.498	630.689	531.264	0	0	0	0	0	0	43.4264	55.2051	42.4534	27.1226	0	28.0234	101.69	37.9946	51.9497	0
227.1/3.2 (12983)	227.102	3.24	12983	0	2.9767	0	0	0	0	2.21788	0	0	0	0	6.05269	0	17.1106	0	0	0	24.9937	0	0	0	622.97	0	0	0	6.37903	0	0	0	0	0	0	0	0	0	0	0	0	0	0	0	0	0	0	0	0
227.1/1.3 (12984)	227.103	1.35	12984	0	0	0	0	0	0	0	0	0	0	0	0	0	0	0	652.045	0	0	0	0	0	0	32.8011	0	0	0	0	344.239	0	0	0	0	0	0	0	0	0	0	0	0	0	0	0	0	0	0
227.1/2.7 (12985)	227.105	2.68	12985	0	0	1.01598	0	0	37.3558	0	0	0	63.0856	0	3.71011	0	0	0	0	0	0	0	0	0	0	0	2.56679	0	0	0	0	0	0	0	0	0	0	0	0	0	0	0	0	0	0	0	3.68988	0	0
227.1/1.1 (12986)	227.105	1.14	12986	0	0	0	0	0	0	0	0	0	462.973	0	0	0	0	0	0	0	1024.17	0	0	0	0	0	0	0	0	0	0	0	0	0	0	0	0	0	0	0	0	0	0	0	0	0	0	0	0
227.1/11.8 (12989)	227.107	11.84	12989	0	0	0	0	0	0	0	0	0	0	0	0	0	0	0	0	0	0	22.2264	0	0	30.7041	11.6691	23.6789	0	0	4.06007	0	0	0	0	0	0	0	0	0	0	0	0	0	0	0	0	0	0	0
227.1/4.8 (12993)	227.125	4.77	12993	74.4981	0	32.4155	23.5386	28.4093	28.0674	0	0	0	0	0	0	0	0	0	90.0161	55.0206	0	0	0	46.9397	0	56.5862	0	0	0	0	55.9911	64.7129	17.3016	0	0	0	0	0	0	0	0	0	0	0	0	0	0	0	0
227.1/5.4 (12994)	227.126	5.37	12994	13.0489	0	31.2416	0	0	0	0	74.7148	114.716	0	0	115.031	88.5461	0	163.681	0	0	0	0	0	93.954	83.8149	82.5236	71.1155	169.706	0	0	0	0	0	0	0	0	0	0	0	38.2007	162.579	201.732	28.0137	0	173.076	0	0	0	0
227.1/8.0 (12995)	227.126	7.99	12995	0	0	0.0756351	0	0	0	28.2271	0	26.1615	27.5414	0	54.7866	24.7717	22.804	41.2642	0	0	0	0	0	0	0	0	0	0	0	0	0	0	0	0	0	0	0	0	0.989322	2.02652	3.26469	21.5617	0	0	0	0	0	0	0
227.1/5.2 (12997)	227.127	5.2	12997	0	0	0.623381	0	0	0	0	0	0	0	0	0	0	0	0	0	0	0	89.8167	0	0	0	0	0	0	76.0685	185.841	0	0	0	0	0	0	0	0	0	3.2052	40.1206	0	0	0	54.0087	0	0	0	0
227.1/4.8 (13000)	227.13	4.77	13000	0	55.8349	0	0	0	0	0	0	0	0	0	0	0	0	0	2.83925	0	49.6356	28.4326	0	0	67.2468	0	24.9275	0	0	0	0	0	0	0	0	0	0	0	0	0	0	0	0	0	0	0	0	0	0
227.1/4.3 (13005)	227.137	4.31	13005	0	0	3.57973	0	0	1.90974	1.6722	16.7926	13.8654	2.85548	9.679	17.3318	20.5263	0	0	0	0	0	16.3966	0	0	10.0783	0	0	0	0	18.4477	0	0	0	0	0	0	0	0	0	6.44119	5.81963	14.4255	2.02878	1.54656	3.0225	8.85932	0	6.8514	0
227.1/4.5 (13006)	227.138	4.54	13006	0	0	0	0	0	0	22.953	19.0407	21.0916	0	14.2251	42.9762	16.4564	0	24.3522	0	0	0	30.6237	0	0	0	0	0	0	3.52943	17.8376	0	0	0	0	0	0	0	0	0	59.3043	78.5888	87.9636	56.9676	33.4223	52.5791	91.8588	51.5125	83.3545	0
227.1/4.9 (13008)	227.138	4.95	13008	0	0	0	0	0	0	150.515	170.583	211.339	0	177.396	117.075	119.135	120.193	215.448	0	0	0	0	0	0	0	0	0	0	0	0	0	0	0	0	0	0	0	0	0	9.71267	0	8.14158	0	0	2.08891	4.69652	0	0.970199	0
227.1/3.6 (13010)	227.138	3.63	13010	0	1.12381	0	0	0	0	0	10.0994	0	45.7028	38.4094	32.0494	0	0	107.608	0	0	0	2.77997	1.07416	0	0	0	0	1.10636	5.13718	0	0	0	0	0	0	0	0	0	0	0	0	0	0	0	0	0	0	0	0
227.2/10.1 (13019)	227.162	10.14	13019	0	0	0	0.422351	0	0	0	0	0	0	0	0	0	0	0	0	0	0	0	0	0	0	0	0.551084	0	0	0	4.23313	0	0.987267	0	0	0	0	0	0	0	0	0	0	0	0	0	0	0	0
227.2/11.8 (13020)	227.163	11.85	13020	59.6169	32.4204	46.1107	27.5065	0	18.9107	0	56.3851	53.7811	0	73.2018	61.6473	41.629	0	34.7043	28.5829	43.6878	0	12.108	21.7594	29.0074	12.5872	41.105	27.2362	33.3884	8.93232	14.3985	31.8364	21.7765	24.0845	30.9911	54.5749	42.9786	0	31.3603	32.4155	41.8569	38.2255	37.4833	39.9547	32.0717	42.4752	53.2338	54.9598	53.7323	37.6914
227.2/10.1 (13021)	227.164	10.13	13021	5.52078	0	0	0	0	0	0	11.6748	0	0	15.59	11.3621	0	0	1.5639	0	0	0	0	1.69028	0	0	6.28239	0	0	0	0	0	0	0	0	20.1207	7.8933	8.1625	2.56606	5.25344	0	0	0	0	0	0	16.213	6.14388	14.2167	0
227.2/3.8 (13024)	227.171	3.84	13024	0	0	0	0	0	4.13222	0	0	0	0	0	0	0	0	0	0	0	0	0	0	20.1117	0	0	0	0	0	0	0	0	0	0	0	0	0	0	0	0	0	0	0	0	0	0	0	0	0
227.2/3.5 (13027)	227.173	3.46	13027	0	0	0	16.0581	0	7.41473	3.15765	0	0	0	0	0	0	0	0	0	0	0	0	0	0	0	0	0	0	0	0	0	0	0	0	0	0	0	0	0	0	0	0	0	0	0	0	0	0	0
227.2/8.1 (13037)	227.175	8.05	13037	263.037	128.866	141.999	153.596	172.593	143.124	57.1254	66.0465	76.7755	0	72.6946	55.1022	56.8986	41.5943	95.7809	189.309	137.763	3.43151	1.34481	0	0	0	0	0	0	0	0	182.509	229.122	137.668	0	0	0	0	0	0	0	0	0	0	0	0	0	0	0	0
227.2/8.3 (13038)	227.175	8.29	13038	361.625	192.544	163.453	194.815	167.627	156.055	29.9611	40.7773	42.2633	55.8606	41.3503	27.8088	42.5768	24.7437	68.3966	240.224	191.911	0	0	0	0	0	0	0	0	1.75722	0	254.98	303.603	182.064	0	0	0	0	0	0	0	0	0	0	0	0	0	0	0	0
227.2/3.7 (13040)	227.175	3.65	13040	16.2781	17.887	0	0	0	0	11.9148	0	0	23.1814	5.97062	19.5177	16.0867	6.80176	25.0447	0	0	0	0	0	0	0	3.46832	0	0	19.1696	0	0	0	0	0	0	0	31.4497	5.24464	32.8385	20.7491	0	0	24.1096	4.44267	11.6763	15.5915	5.03973	0	17.6103
227.2/12.8 (13050)	227.198	12.8	13050	22.6807	7.87971	0	0	0	0	0	14.1092	6.44546	2.88767	2.01454	0	4.79272	0	1.69117	7.38641	0	0	0	0	0	0	0	0	1.59701	0	0	0	0	0	4.84058	8.18054	5.04241	5.38324	2.6363	0	12.1735	9.70675	7.40834	4.89848	7.71698	5.14306	9.60603	8.27678	0	3.63407
227.2/14.9 (13053)	227.201	14.91	13053	17.1118	2.4336	9.45025	1.87883	2.46956	3.35442	0	6.94154	0	1.39591	4.69655	4.54953	3.12434	2.72869	4.8988	0	5.81329	0	0	2.58583	5.86966	7.9208	10.6781	0	5.37108	10.3143	17.4528	9.35913	0	0	0	8.18213	4.94848	4.41066	3.31924	4.48797	0	0	0	0	0	0	5.54353	7.55896	0	0
228.1/5.2 (13074)	228.061	5.2	13074	0	0	0	0	0	0	0	0	0	0	0	0	0	0	0	0	0	0	0	0	0	0	0	0	0	0	0	0	0	0	0	0	0	0	0	0	25.5379	0	27.8371	22.8802	0	87.47	0	0	0	0
228.1/3.1 (13076)	228.065	3.08	13076	8.53042	0	0	0	0	0	0	0	0	0	0	0	0	0	0	36.3731	23.4413	0	0	0	0	0	0	0	0	10.5019	3.17601	75.6446	82.738	44.6871	0	0	0	0	0	0	0	0	0	0	0	0	0	0	0	0
228.1/4.9 (13083)	228.086	4.86	13083	0	0	0	0	0	0	0	103.62	0	9.46614	0	0	0	21.7569	0	0	0	0	0	0	0	0	0	0	0	0	0	0	0	0	0	0	0	0	0	0	0	0	0	0	0	0	0	0	0	0
228.1/5.0 (13084)	228.086	4.96	13084	0	0	0	0	0	0	136.913	0	91.6919	0	115.396	86.5334	64.839	0	226.121	0	0	0	0	0	0	0	0	0	0	0	0	0	0	0	0	0	0	0	0	0	0	0	0	0	0	0	0	0	0	0
228.1/4.6 (13086)	228.088	4.58	13086	0	0	0	0	0	0	122.848	74.5044	33.405	123.172	61.3831	58.6484	57.6862	106.752	13.8227	0	0	0	0	0	0	0	1.43169	0	0	0	0	0	0	0	0	0	0	0	0	0	0	0	0	0	0	0	0	0	0	0
228.1/1.1 (13087)	228.09	1.1	13087	0	0	0	0	0	0	0	0	0	0	0	0	0	0	0	0	0	0	0	0	0	0	0	0	0	0	0	0	0	0	0	0	0	0	0	0	0	0	0	0	0	30.5324	0	0	0	0
228.1/1.8 (13092)	228.105	1.75	13092	0	0.735594	0	0	0	0	0	0	0	0	0	0	0	0	0	0	0	0	56.9678	0	0	98.7235	0	0	0	4.08121	111.941	0	46.0216	0	0	0	0	0	0	0	0	0	0	0	0	0	0	0	0	0
228.1/4.1 (13104)	228.133	4.11	13104	0	3.09077	0	0	0	2.54508	4.15199	5.25715	7.6233	0	0	0	0	10.2905	23.0372	0	0	0	0	0	0	0	0	0	0	0	0	0	0	0	0	0	0	0	0	0	0	0	0	0	0	0	0	0	0	0
228.1/3.4 (13108)	228.134	3.44	13108	0	28.9482	0	24.4464	6.17103	0	0	13.5052	55.6408	0	26.3609	43.3357	0	0	0	0	0	0	0	0	0	15.1103	0	0	0	13.2036	3.17882	0	0	0	0	0	0	0	0	0	0	0	0	0	0	0	0	0	0	0
228.1/3.8 (13114)	228.135	3.82	13114	0	0	0	0	0	0	0	0	0	0	0	0	0.636491	0	0	0	0	0	0	0	0	54.8775	0	0	0	0	0	31.1997	0	0	0	0	0	0	0	0	0	0	0	0	0	0	0	0	0	0
228.1/3.5 (13118)	228.137	3.48	13118	0	0	0	0	4.71463	6.47787	9.22128	3.91881	0	19.3077	0	0	0	0	0	0	0	9.44495	0	10.7786	0	0	0	0	0	0	0	0	0	0	0	0	0	0	0	0	0	0	0	0	0	0	0	0	0	0
228.1/1.1 (13121)	228.144	1.08	13121	257.635	333.267	303.417	616.678	307.142	368.43	429.465	369.124	343.327	386.859	345.253	401.314	317.818	385.1	371.043	412.138	402.745	287.653	527.893	488.413	466.247	583.286	480.636	537.851	9.05922	505.963	559.977	403.658	431.136	405.709	0	0	0	0	0	0	24.1754	28.1854	23.9429	11.4134	11.9933	4.92889	24.992	12.5275	17.9639	0
228.2/1.6 (13124)	228.165	1.61	13124	0	0	0	2.16333	0	0	0	0	0.52671	0	0	0	0	0	0	0	1.61773	0	0	0	0	0	0	0	0	0	0	2.0224	0	0	0	0	0	0	0	0	0	0	0	0	0	0	0	0	0	0
228.2/2.0 (13127)	228.169	1.95	13127	0	0	0	97.2753	0	0	29.9966	27.95	0	0	37.8809	0	31.2843	0	0	50.7571	43.4016	0	86.7727	0	0	0	41.1294	51.3958	7.54482	0	0	0	0	99.4075	0	0	0	0	0	0	0	0	0	0	0	0	0	0	0	0
228.2/1.9 (13128)	228.17	1.85	13128	0	29.2926	74.7668	15.6766	31.2966	56.139	0	1.46734	46.8741	20.8546	0	24.7652	8.01189	43.1469	43.624	6.42873	5.28759	0	1.96186	29.0394	35.3625	90.9565	10.1964	0	8.16624	41.8535	108.105	47.1147	161.039	0	0	0	0	0	0	0	0	0	0	0	0	0	0	0	0	0
228.2/12.7 (13139)	228.194	12.7	13139	72.6568	51.0485	42.2588	20.8837	33.358	0	0	64.0731	74.21	0	76.0677	80.3984	51.8015	95.9921	48.4367	63.4066	34.2924	0	18.8179	20.7851	28.1888	5.40259	42.4223	26.9979	23.9713	8.77115	64.8157	38.3776	22.2074	39.4232	59.6241	96.1613	99.9399	84.1759	56.947	52.7425	80.33	83.9595	66.558	82.9624	59.0355	79.3756	66.1844	111.663	71.5163	68.165
228.2/12.4 (13141)	228.195	12.41	13141	0	40.6898	20.1969	0	0	0	5.90758	0	14.8292	0	9.01702	0	2.73482	28.1847	42.9157	33.1154	50.6471	27.7262	20.7508	0	4.94695	25.0318	51.7634	6.48411	0	0	22.055	0	0	0	13.9831	23.0651	0	0	31.8601	43.9047	5.6428	11.9647	11.5789	0	0	15.077	5.40728	30.5617	0	4.34749
228.2/11.5 (13142)	228.195	11.49	13142	2202.89	1341.33	1530.55	755.382	1069.14	843.636	1427	1587.32	1950.06	0	2220.94	1660.25	1398.87	1009.75	1130.82	1256.4	1151.33	0	775.661	915.348	1153.01	721.477	1570.29	1103.85	1067.51	937.152	1043.44	1117.74	776.995	1091.11	1208.27	1844.92	1486.15	1323.88	1076.38	1137.4	1363.6	1220.08	1297.74	1421.19	1204.38	1388.99	1896.11	1784.56	1499.83	1235.28
228.2/12.7 (13146)	228.198	12.73	13146	0	0	0	0	0	15.534	59.7513	0	0	61.9585	0	0	0	0	0	0	0	49.937	0	0	0	0	0	0	0	0	0	0	0	0	0	0	0	0	0	0	0	0	0	0	0	0	0	0	0	0
228.2/14.9 (13151)	228.232	14.88	13151	78.2048	36.3155	39.2962	27.3207	34.1509	28.2643	43.4158	31.213	48.8448	39.0421	46.0582	35.5546	42.2419	36.2594	32.2538	27.2609	34.4151	0	28.2644	26.8821	37.6052	27.2545	41.8711	34.1272	35.5598	28.5509	27.9928	28.2147	26.5106	30.3443	34.1192	41.8374	40.556	33.3194	33.8832	34.7332	33.6731	36.491	38.6921	39.6651	31.7821	42.9641	41.123	46.4337	42.6485	37.8771
228.3/12.4 (13152)	228.265	12.42	13152	0	0	0	0	0	0	0	9.72392	9.04784	0	0	0	0	0	0	0	4.29267	0	0	0	0	0	7.4654	0	0	0	0	0	0	0	0	0	0	0	0	5.80049	9.46589	0	0	0	4.97905	6.43288	11.2387	12.66	13.6016	0
228.3/12.9 (13154)	228.268	12.89	13154	0	59.1852	20.247	20.4004	42.9078	22.7142	65.5952	83.4828	57.8925	59.6967	78.8995	69.0685	43.8885	25.4467	0	40.0314	29.1801	0	0	19.8168	29.6629	0	31.4798	17.1186	21.7363	11.3495	0	25.9299	0	21.5828	0	87.2752	0	81.6532	0	54.7541	67.6586	64.4723	61.6923	73.7201	65.6133	64.3151	76.7099	73.9058	73.7206	73.7082
228.3/13.0 (13155)	228.269	13	13155	88.8431	0	0	0	0	0	0	0	0	0	0	0	0	0	36.2193	0	0	0	11.6349	0	0	12.2159	0	0	0	0	13.2113	0	14.7214	0	29.3297	0	75.7234	0	55.6257	0	0	0	0	0	0	0	0	0	0	0
228.3/12.4 (13156)	228.272	12.42	13156	0	5.71623	0	0	0	0	0	0	0	0	0	13.6625	0	5.99355	0	0	0	0	0	0	0	0	0	0	0	0	0	3.71981	0	0	0	0	0	0	0	0	1.59031	0	0	7.20824	0	0	0	0	0	0
229.0/1.3 (13171)	229.023	1.33	13171	2.96434	0	0	0	0	4.83791	0	0	0	0	3.74519	0	10.3323	38.6997	0	0	2.44471	0	0	0	0	2.99723	0	0	0	9.27454	0	0	0	0	0	0	0	0	0	0	0	0	0	0	0	0	0	0	0	0
229.0/1.2 (13172)	229.024	1.19	13172	0	0	0	0	0	0	0	0	0	126.032	0	0	0	13.4351	0	0	0	5.41588	0	1.53716	0	0	0	0	0	0	0	0	0	0	0	0	0	0	0	0	0	0	0	0	0	0	0	0	0	0
229.0/1.7 (13174)	229.031	1.69	13174	0	0	0	0	0	0	0	0	0	0	0	0	0	0	0	0	0	0	2.11619	0	11.1165	0	5.83215	5.47463	0	0	0	0	0	0	0	0	0	0	0	0	0	0	0	0	0	0	0	0	0	0
229.1/5.0 (13182)	229.095	5.03	13182	0	0	0	0	0	0	0	10.2784	0	0	0	8.64049	9.19497	0	56.5555	0	0	0	0	0	0	0	1.55451	0	0	0	2.8369	0	0	0	0	0	0	0	0	0	0	0	0	0	0	0	0	0	0	0
229.1/4.4 (13184)	229.1	4.42	13184	438.77	318.08	291.53	238.03	245.034	0	377.52	389.15	462.833	348.056	413.232	401.759	386.23	398.247	511.305	381.523	324.981	0	212.339	45.4641	0	259.341	160.476	133.143	181.697	84.6262	239.924	326.732	458.45	220.599	0	0	0	0	0	0	0	0	0	0	0	0	0	0	0	0
229.1/4.7 (13185)	229.1	4.67	13185	288.548	122.269	124.956	121.485	84.9254	100.766	0	66.937	68.0972	0	38.3631	68.6128	85.5828	102.167	116.695	186.965	117.102	0	0	0	0	0	0	0	0	0	0	150.811	205.228	114.518	0	0	0	0	0	0	0	0	0	0	0	0	0	0	0.828229	0
229.1/3.7 (13191)	229.117	3.66	13191	36.7584	0	0	0	18.347	21.3072	0	0	470.321	0	685.681	0	0	0	489.573	466.73	203.083	0	0	0	396.383	373.04	672.147	624.318	582.761	0	0	199.509	44.8967	0	0	0	0	0	0	0	0	0	0	0	0	0	0	0	0	0
229.1/2.8 (13193)	229.117	2.82	13193	0	0	122.069	0	131.808	143.859	0	3.00734	11.366	0	0	7.21014	42.5531	0	0	0	0	0	0	25.0496	40.6744	0	0	6.93481	0	0	0	103.374	65.643	0	0	0	0	0	0	0	0	0	0	0	0	0	0	0	0	0
229.1/1.5 (13195)	229.117	1.49	13195	68.705	36.8102	0	0	0	33.3832	0	0	5.22647	0	1.49517	10.6535	0	0	7.97769	0	15.0868	0	0	0	5.0157	0	0	0	4.11151	29.4625	22.2704	0	0	0	0	0	0	0	0	0	0	0	0	0	0	0	0	0	0	0
229.1/2.7 (13197)	229.117	2.68	13197	195.884	81.2627	7.89537	0	0	0	0	0	16.7562	0	7.7028	0	24.1316	0	72.1376	0	0	0	0	0	0	1.61827	0	1.28128	4.44826	19.8358	74.2547	0	34.2654	0	0	0	0	0	0	0	0	0	0	0	0	0	0	0	0	0
229.1/3.1 (13198)	229.117	3.14	13198	19.9352	0	287.576	0	294.606	0	0	13.3911	329.665	0	0	0	378.431	0	244.218	419.272	0	0	282.757	438.723	500.142	69.5388	672.726	702.072	349.042	0	157.673	375.502	0	0	0	0	0	0	0	0	0	0	0	0	0	0	0	0	0.511149	0
229.1/5.7 (13200)	229.117	5.7	13200	187.281	141.552	127.714	185.589	106.008	113.332	9.4121	0	4.02598	8.56354	4.84881	9.38853	8.03092	20.1137	25.6716	41.9734	46.4191	0	0	0	19.5735	19.9691	7.64642	11.265	23.8489	0	9.01468	54.1587	58.7938	15.041	0	0	0	0	0	0	0	0	0	0	0	0	0	0	0	0
229.1/4.0 (13204)	229.118	3.98	13204	185.513	101.31	11.5166	0	17.8954	0	93.1315	104.53	99.884	0	93.9615	65.1854	67.0179	0	277.532	120.59	107.976	0	13.6853	0	0	0	5.11872	0	0	0	0	94.5651	94.359	49.9809	0	0	0	0	0	0	0	0	0	0	0	0	0	0	1.26418	0
229.1/3.5 (13206)	229.118	3.51	13206	0	23.4909	62.3924	0	86.3346	0	438.293	509.839	0	0	0	357.356	474.352	323.289	0	0	25.6453	0	195.129	279.608	27.81	171.21	54.0862	31.7509	0	355.515	703.793	17.2285	43.2815	147.154	0	0	0	0	0	0	0	0	0	0	0	0	6.026	3.47264	0	0
229.1/1.0 (13207)	229.118	1.03	13207	186.824	275.136	302.91	343.082	246.346	353.797	0	0	227.486	0	223.418	256.373	203.105	0	270.414	275.383	326.026	26.8273	191.631	273.225	314.533	252.629	241.413	292.337	293.577	336.245	258.06	385.629	274.035	379.274	0	0	0	0	0	0	0	0	0	9.79747	0	9.67897	2.47728	0	0	0
229.1/2.8 (13210)	229.119	2.84	13210	0	0	0	144.332	0	0	0	0	0	8.28921	7.77744	0	0	0	0	0	65.4112	0	0	0	0	0	0	0	0	0	0	0	0	230.299	0	0	0	0	0	0	0	0	0	0	0	0	0	0	0	0
229.1/3.0 (13211)	229.12	3.01	13211	0	292.394	0	0	0	170.353	532.595	339.419	0	545.344	414.441	197.411	0	252.82	0	0	403.078	195.216	0	0	0	0	0	0	0	451.761	0	0	0	199.381	0	0	0	0	0	0	0	0	0	0	0	0	0	0	0	0
229.1/3.9 (13213)	229.12	3.95	13213	0	0	0	0	0	0	0	0	0	89.1653	0	0	0	64.6065	0	0	0	86.6114	0	29.2418	0	0	0	0	0	0	0	0	0	0	0	0	0	0	0	0	0	0	0	0	0	0	0	0	0	0
229.1/1.0 (13218)	229.122	1.02	13218	0	0	0	0	0	0	187.521	223.626	0	229.971	0	0	0	288.239	0	0	0	264.626	0	0	0	0	0	0	0	0	0	0	0	0	0	0	0	0	0	0	0	0	0	0	0	0	0	0	0	0
229.1/2.5 (13221)	229.125	2.54	13221	0	0	0	0	0	0	8.22771	0	0	5.95299	0	0	22.0715	30.8144	0	0	0	0	0	0	0	0	0	0	0	0	0	0	0	0	0	0	0	0	0	0	0	0	0	0	0	0	0	0	0	0
229.1/4.0 (13225)	229.137	4	13225	0	0	0	0	0	0	0	0	0	0	0	0	0	0	0	0	0	0	0	0	10.5379	0	0	111.325	0	0	0	0	0	0	0	0	0	0	0	0	0	2.20324	0	0	0.868677	0	2.30613	0	0	0
229.1/6.7 (13228)	229.139	6.69	13228	0	0	0	0	23.6424	32.7668	4.8021	16.2525	0	0	0	0	0	0	0	0	0	0	0	0	0	0	0	0	0	0	0	0	0	12.7233	0	68.4532	0	0	0	0	0	0	0	0	5.65923	0	0	0	0	0
229.1/2.9 (13235)	229.142	2.95	13235	0	0	0	0	0	1.06111	0	0	0	0	0	11.3491	0.199384	0	0	0	0	0	0	0	0	0	0	0	0	0	0	0	0	0	0	0	0	0	0	0	0	0	0	0	0	0	0	0	0	0
229.1/7.5 (13237)	229.142	7.48	13237	92.5102	85.3512	119.824	37.9888	78.6706	0	85.5088	89.1778	120.38	0	117.291	71.1507	76.4768	65.8749	84.6806	93.7107	85.5442	0	83.6917	80.0528	88.3652	75.473	124.259	75.1035	75.0238	82.3162	72.8721	84.2873	86.9334	100.403	71.9216	79.0629	81.0878	34.2397	52.4114	53.7917	42.9727	49.7086	60.8568	41.9726	56.7917	56.6252	49.0585	106.17	72.9723	63.5025
229.1/15.9 (13239)	229.143	15.85	13239	0	0	2.61445	5.65827	0	0	0	0	0	0	0	0	0	0	0	0	4.37511	0	0	0	0	0	0	0	0	0	0	0	0	0	0	0	0	0	0	3.10174	0	0	0	0	0	0	0	0	0	0
229.1/7.5 (13245)	229.145	7.46	13245	0	0	0	0	0	76.3339	0	0	0	77.8893	0	0	0	0	0	0	0	86.2595	0	0	0	0	0	0	0	0	0	0	0	0	0	0	0	0	0	0	0	0	0	0	0	0	0	0	0	0
229.1/1.0 (13247)	229.147	1.02	13247	0	0	0	0	0	0	0	0	33.5748	0	0	0	0	0	29.4845	0	0	0	0	0	45.8563	58.1528	54.1928	0	0	0	51.3335	0	0	0	0	0	0	0	0	0	8.49147	0	0	0	0	0	0	0	0	0
229.2/3.6 (13258)	229.153	3.65	13258	1148.92	738.914	600.57	0	596.079	0	0	0	0	0	0	0	0	0	0	1685.61	2171.46	0	351.863	359.056	554.156	937.77	396.325	215.995	48.1476	344.083	0	1575.4	887.536	1628.23	0	0	0	0	0	0	0	0	0	0	0	0	0	0	0	0
229.2/5.7 (13259)	229.153	5.69	13259	0	0	0	0	0	0	114.256	104.846	122.566	109.97	110.143	130.882	94.9482	172.203	161.164	5.17892	3.34707	0	0	0	0	1.37626	0	0	0	0	0	4.50062	4.91631	0	0	0	0	0	0	0	0	0	0	0	0	0	0	0.758653	0	0
229.2/3.3 (13262)	229.154	3.31	13262	0	920.621	0	1243.84	0	1191.82	1884.55	1705.13	35.0608	0	1786.89	1736.85	2337.36	1438.26	0	0	0	0	0	801.485	0	0	113.072	0	0	884.943	332.837	63.1577	0	0	0	0	0	0	0	0	0	0	0	0.52572	0	0	0	0	0	0
229.2/2.8 (13264)	229.154	2.76	13264	4.70687	0	327.883	1059.6	93.204	454.978	90.4453	0	27.2181	0	22.4364	19.2672	58.9561	653.418	0	0	96.5597	0	0	162.894	38.223	0	11.7492	38.5033	10.6155	91.3084	27.988	0	0	19.1081	0	0	0	0	0	0	0	0	0	0	0	0	0	0	0	0
229.2/3.4 (13266)	229.154	3.42	13266	2627.93	0	1099.42	1431.52	1641.96	0	0	0	1502.17	2090.92	0	0	0	0	4302.12	3214.62	1131.04	0	995.274	0	473.121	1233.33	790.599	711.397	377.863	0	0	0	5932.71	2168.64	0	0	0	0	0	0	0	0	0	0	0	0	0	0	0	0
229.2/3.8 (13268)	229.154	3.82	13268	0	0	0	0	0	0	0	0	0	0	0	0	14.5807	0	0	0	0	0	904.882	157.147	321.328	0	393.594	0	0	0	1658.34	0	0	0	0	0	0	0	0	0	0	0	0	0	0	0	0	0	0	0
229.2/1.9 (13269)	229.154	1.93	13269	0	6.22564	31.5529	0	0	0	0	0	0	0	0	0	0	0	0	74.5976	0	0	2.52547	0	0	0	0	0	0	0	0	0	9.65019	0	0	0	0	0	0	0	0	0	0	0	0	0	0	0	0	0
229.2/2.3 (13271)	229.154	2.3	13271	123.634	0	0	256.927	0	0	6.82932	7.38786	12.7206	0	0	0	0	0	0	0	0	0	0	0	0	0	0	0	0	0	0	0	0	0	0	0	0	0	0	0	0	0	0	0	0	0	0	0	0	0
229.2/2.9 (13274)	229.154	2.88	13274	0	167.957	0	0	300.823	15.6348	0	97.6797	13.2232	0	86.9056	0	21.245	0	0	0	0	0	0	0	171.179	0	0	226.016	21.7739	0	2.92743	919.771	365.936	1121.14	0	0	0	0	0	0	0	0	0	0	0	0	0	0	0	0
229.2/3.1 (13275)	229.154	3.06	13275	720.78	0	366.501	0	56.4793	0	0	0	0	0	0	0	0	0	0	1541.98	1391.98	0	860.681	0	0	0	400.077	0	248.654	0	626.37	1021.3	0	0	0	0	0	0	0	0	0	0	0	0	0	0	0	0	0	0
229.2/4.0 (13273)	229.154	4.04	13273	1.57074	9.78541	0	40.5998	0	0	0	21.6015	11.3648	0	28.7383	0	0	9.89033	6.40413	0	0	4.87206	0	608.389	0	716.073	0	0	1217.5	857.643	0	0	0	0	0	0	0	0	0	0	0	0	0	0	0	0	0	0	0	0
229.2/2.6 (13277)	229.156	2.57	13277	0	166.139	23.4789	0	65.905	0	0	7.49372	0	38.0576	8.94904	92.6817	81.0143	0	0	6.52916	0	29.6396	0	0	0	1.36664	0	6.65084	0	32.6584	0	0	0	149.821	0	0	0	0	0	0	0	0	0	0	0	0	0	0	0	0
229.2/3.6 (13278)	229.156	3.57	13278	0	0	0	0	0	686.61	55.309	0	0	0	0	0	0	0	0	0	0	1285.56	0	0	0	0	0	0	0	0	0	0	0	0	0	0	0	0	0	0	0	0	0	0	0	0	0	0	0	0
229.2/4.0 (13280)	229.157	4.04	13280	0	0	0	0	0	0	27.876	0	0	18.7148	0	15.6559	0	0	0	0	0	0	322.821	0	0	0	0	0	0	0	0	0	0	0	0	0	0	0	0	0	0	0	0	0	0	0	0	0	0	0
229.2/3.0 (13281)	229.158	2.98	13281	0	0	0	0	0	0	0	0	0	0	0	0	0	37.7366	0	0	0	277.766	0	7.79717	0	0	0	0	0	0	0	0	0	0	0	0	0	0	0	0	0	0	0	0	0	0	0	0	0	0
229.2/13.7 (13286)	229.179	13.72	13286	10.2443	0	0	0	0	0	0	0	0.974909	0	0.81661	0	0.582376	0	0.748546	0	0	0	0	0	0	0	0	0	0	0	0	0	0	0	0	0	0	0	0	0	0	0	1.98949	0	0	0	0	0	0	1.62602
230.0/1.3 (13311)	229.975	1.35	13311	7.09192	0	0	0	0	0	0	0	0	0	0	0	0	1.07879	0	0	0	0	0	0	0	0	0	2.13781	0	0	0	2.21901	1.35303	0	0	0	0	0	0	0	0	0	0	0	0	0	0	0	0	0
230.0/1.9 (13313)	230.034	1.89	13313	0	0	0	0	0	0	0	0	0	80.543	0	6.76847	3.2113	162.264	0	0	0	0	0	0	0	0	0	0	0	0	0	0	0	0	0	0	0	0	0	0	0	0	0	0	0	0	0	0	0	0
230.1/5.5 (13315)	230.077	5.51	13315	0	0	0	0	0	0	0	0	0	0	0	0	0	0	0	0	0	0	0	0	0	0	0	0	0	0	0	0	0	0	0	0	0	0	0	0	48.1619	95.7484	30.8436	48.0123	3.38418	124.265	9.42045	5.82899	2.89939	0
230.1/5.9 (13316)	230.077	5.94	13316	8.70785	2.0086	2.40688	0	0	0	12.7417	16.3424	23.7148	2.86587	12.5925	0	15.3689	15.756	33.8379	5.02704	6.31018	0	9.23529	3.85443	10.9389	12.0206	11.4378	4.44253	5.68936	2.13901	0	4.50093	8.03244	2.45076	0	0	0	0	0	0	0	0	0	0	0	0	0	0	0	0
230.1/2.7 (13318)	230.081	2.66	13318	0	0	0	0	0	0	0	3.67542	9.32459	5.84034	2.83538	0	0	0	24.0472	0	0	0	0	0	0	0	0	0	0	0	0	0	0	0	0	0	0	0	0	0	0	0	0	0	0	0	0	0	0	0
230.1/2.9 (13319)	230.081	2.88	13319	0	0	0	0	0	0	0	0	0	0	0	0	0	0	0	3.41656	0	0	47.2167	14.148	0	0	19.2639	0	36.6375	0	31.1259	3.52552	0	0	0	0	0	0	0	0	0	0	0	0	0	0	0	0	0	0
230.1/1.6 (13333)	230.111	1.57	13333	128.039	101.58	0	0	0	0	0.395855	0	0	0	0	28.8262	0	0	19.9545	0	0	0	0	90.0716	83.0083	0	0	0	0	110.624	68.0788	111.947	0	0	0	0	0	0	0	0	0	0	0	0	0	0	0	0	0	0
230.1/1.4 (13334)	230.112	1.4	13334	0	1.87767	0	0	0	0	0	2.0237	0	0	1.66117	0	0	0	0	0	0	0	0	0	0	0	0	7.03443	0	0	0	0	0	0	0	0	0	0	0	0	0	0	0	0	0	0	0	0	0	0
230.2/3.0 (13376)	230.161	3.02	13376	0	4.81724	0	0	4.83262	0	0	0	0	3.09178	0	0	0	4.99754	0	47.7381	0	11.9393	85.8481	1.27734	5.66511	15.3727	0	0	0	0	3.88403	0	0	10.4703	0	0	0	0	0	0	0	0	0	0	0	0	0	0	0	0
230.2/12.5 (13386)	230.248	12.47	13386	5098.41	2414.6	1983.02	1231.22	1623.18	0	2547.37	2947.24	2823.64	0	3485.01	3796.8	1863.74	1870.55	1841.61	1880.86	2316.64	0	672.456	1461.08	1680.32	853.761	2837.29	1557.66	1440.78	1159.11	767.619	1441.99	966.154	1404.14	1352.07	3244.73	3126.68	2774.5	2006.24	2631.3	2523.9	2595.51	2971.94	3127.44	2240.18	2770.19	3240.23	3603.78	3247.61	2385.57
230.3/12.4 (13388)	230.25	12.41	13388	0	0	0	0	0	1457.26	0	0	0	2570.86	0	0	0	0	0	0	0	3037.65	0	0	0	0	0	0	0	0	0	0	0	0	0	0	0	0	0	0	0	0	0	0	0	0	0	0	0	0
231.0/1.5 (13404)	230.965	1.52	13404	0	0.830627	0	0	0	0	0	1.06437	0	0	1.42502	0	0	0	0	3.32621	2.53119	0	0	0	0	0	0	0	0	0	0	1.63013	0	0	0	0	0	0	0	0	0	0	0	0	0	0	0	0	0	0
231.0/1.4 (13406)	230.981	1.37	13406	0	0	0	0	0	0	0	0	0	0	0	0	0	0	0	0	0	0	45.511	0	0	56.7517	0	0	0	7.04305	0	0	0	2.4512	0	0	0	0	0	0	0	0	0	0	0	0	0	0	0	0
231.0/1.1 (13408)	230.987	1.13	13408	44.6893	0	18.201	0	0	0	0	0	0	0	0	0	0	0	6.14348	26.8818	0	0	47.2512	0	1.53302	30.1572	36.1378	0	22.2305	0	0	34.842	0	0	0	0	0	0	0	0	0	0	0	0	0	0	0	0	0	0
231.0/1.5 (13412)	230.997	1.5	13412	0	0	0	0	0	0	1.12259	1.56437	3.15196	0	5.55223	10.5789	109.244	0	0	0	0	0	0	0	0	0	0	0	0	0	11.8032	0	0	0	0	0	0	0	0	0	0	0	0	0	0	0	0	0	0	0
231.0/1.5 (13413)	231	1.48	13413	0	0	0	0	0	0	0	0	3.91771	172.321	1.31141	0	0	222.521	0	0	0	0	0	0	0	0	0	0	0	0	0	0	0	0	0	0	0	0	0	0	0	0	0	0	0	0	0	0	0	0
231.0/2.1 (13415)	231.025	2.14	13415	0	0	0	0	0	0	0	0	0	1.78612	0	3.26156	0	34.2584	0	0	0	0	0	0	0	0	0	0	0	0	0	0	0	0	0	0	0	0	0	0	0	0	0	0	0	0	0	0	0	0
231.0/1.2 (13416)	231.026	1.23	13416	0	0	0	0	0	0	0	0	18.2764	279.002	0	11.4208	105.984	545.368	0	0	0	0.463481	0	0	0	0	0	0	0	0	0	0	0	0	0	0	0	0	0	0	0	0	0	0	0	0	0	0	0	0
231.1/1.1 (13427)	231.096	1.09	13427	118.938	131.508	132.55	0	126.16	0	107.306	86.4004	73.4078	100.731	100.522	144.627	92.3529	0	117.708	309.572	350.455	0	127.892	126.698	114.412	176.447	215.057	195.843	184.766	127.036	93.8825	278.65	252.123	306.918	0	0	0	0	0	0	0	0	1.29409	0	0	0	0	0	0	0
231.1/1.5 (13428)	231.096	1.48	13428	15.9949	27.9376	23.4556	0	14.9539	13.7706	35.9478	41.221	40.3141	2.04372	41.6892	29.6016	27.6718	0	28.3983	28.2212	0	0	0	26.4692	24.2238	6.64625	0	43.852	33.7521	24.572	30.6329	23.859	0	0	0	0	0	0	0	0	0	0	0	0	0	0	0	0	0	0
231.1/1.1 (13431)	231.1	1.09	13431	0	0	0	0	0	134.354	0	0	0	0	0	0	0	133.202	0	0	0	263.192	0	0	0	0	0	0	0	0	0	0	0	0	0	0	0	0	0	0	0	0	0	0	0	0	0	0	0	0
231.1/3.4 (13440)	231.11	3.35	13440	0	0	0	0	0	0	0	0	0	2.23522	0	0	0	0	0	0	0	0	8.6101	6.44061	0	104.702	0	0	13.7794	9.93186	20.2771	0	0	0	0	0	0	0	0	0	0	0	0	0	0	0	0	0	0	0
231.1/4.7 (13441)	231.112	4.68	13441	0	0	0	0	0	0	24.5405	15.5169	47.0667	0	47.5386	37.7987	13.8354	0	85.6092	0	0	0	0	0	0	0	4.99862	0	0	0	0	0	8.04074	0	0	0	0	0	0	0	0	0	0	0	0	0	0	0	0	0
231.1/4.2 (13443)	231.112	4.2	13443	0	0	0	0	4.89797	0	0	0	0	0	0	0	0	0	0	0	0	0	39.0838	13.6009	0	0	14.266	0	0	25.5141	144.4	0	0	0	0	0	0	0	0	0	0	0	0	0	0	0	0	0	0	0
231.1/4.4 (13444)	231.112	4.39	13444	25.1493	5.13878	9.62962	0	0	0	249.822	228.174	271.691	300.334	402.679	318.898	310.466	460.685	590.506	55.9968	22.2867	0	0	0	0	38.9966	17.5541	24.8089	77.1662	0	0	38.5181	16.6083	0	0	0	0	0	0	0	0	0	0	0	0	0	0	0	0	0
231.1/5.4 (13445)	231.112	5.39	13445	0	0	0	0	14.6248	17.5392	10.8381	7.19499	0	0	29.3036	5.29518	0	0	0	0	0	0	0	56.0833	20.2711	0	0	7.78499	0	68.8885	141.385	11.4896	0	0	0	0	0	0	0	0	0	0	0	0	0	0	0	0	0	0
231.1/3.1 (13446)	231.112	3.11	13446	0	0	0	0	0	0	0	0	0	52.0151	90.1709	74.0046	0	0	0	810.774	929.787	0	0	0	0	33.6897	78.6677	145.054	0	0	0	0	1.15356	0	0	0	0	0	0	0	0	0	0	0	0	0	0	0	0	0
231.2/5.4 (13466)	231.168	5.42	13466	0	0	0	0	6.73891	0	13.0494	5.43399	5.8194	0	0	0	11.138	42.0073	3.90522	2.79894	0	0	0	3.54566	0	4.06965	3.78416	4.35296	0	49.6852	75.6081	0	1.797	0	0	0	0	0	0	0	0	0	0	0	0	0	0	0	0	0
231.2/3.0 (13467)	231.169	2.99	13467	0	0	0	525.491	0	41.353	0	0	5.41134	0	4.63201	0	0	41.6091	0	416.217	204.421	0	0	0	91.668	0	25.7633	1.38338	0	9.22062	0	1250.56	1297.69	24.971	0	0	0	0	0	0	0	0.95409	0	0	0	0	8.26117	0	0	0
231.2/1.2 (13468)	231.169	1.16	13468	0	83.9529	197.06	156.995	212.134	194.718	0	0	0	0	0	0	0	0	0	0	36.7204	0	0	14.5829	0	0	0	0	0	0	0	0	0	319.467	0	0	0	0	0	0	0	0	0	0	0	0	0	0	0	0
231.2/2.0 (13470)	231.169	2.01	13470	0	0	110.694	14.9443	0	156.644	0	0	0	0	0	0	0	0	0	0	0	0	0	0	0	0	1.29377	0	0	2.5594	0	0	222.92	0	0	0	0	0	0	0	0	0	0	0	0	0	0	0	0	0
231.2/2.6 (13469)	231.169	2.55	13469	0	121.826	0	521.874	161.968	0	0	0	0	0	0	14.8469	0	15.0701	0	8.26358	0	72.7551	0	0	20.2059	0	0	0	0	0	0	0	0	0	0	0	0	0	0	0	0	0	0	0	0	0	0	0	0	0
231.2/2.8 (13472)	231.169	2.81	13472	1002.46	820.903	478.551	0	0	0	21.5005	0	0	3.11552	0	0	0	0	60.2566	0	0	0	181.996	9.77676	0	0	0	0	0	0	51.8149	56.9977	23.4521	382.406	0	0	0	0	0	0	0	0	0	0	0	0	0	0	0	0
231.2/3.2 (13473)	231.17	3.17	13473	2724.02	866.477	2150.88	0	3014.11	2271.74	48.5392	35.9054	46.0403	0	28.6726	63.1143	92.0351	43.9492	131.953	336.923	373.157	0	381.594	146.952	125.083	121.563	60.5712	30.285	0	50.7332	85.9854	870.862	810.082	855.232	0	0	0	0	0	0	0	0	0	0	0	0	0	0	0	0
231.2/3.8 (13474)	231.17	3.8	13474	7856.37	3328.04	4039.02	6178.55	3491.03	3295.69	175.851	54.2176	148.912	177.82	85.009	236.959	288.884	418.366	689.106	432.857	292.742	295.079	367.22	140.202	338.262	109.05	69.0205	36.702	0	70.3544	0	2196.43	3494.56	2103.84	0	0	0	0	0	0	0	7.17094	0	0	1.90584	0	12.317	11.8133	2.30613	0
231.2/3.4 (13477)	231.171	3.41	13477	1728.75	3413.43	174.345	0	343.869	673.198	135.283	64.2093	72.7979	-0.651657	75.3946	185.021	141.59	354.535	55.1802	629.023	388.209	332.7	412.942	77.6794	336.868	324.445	108.314	45.302	13.0855	31.4077	82.7635	2539.28	2641.71	1137.74	0	0	0	0	0	0	2.82062	9.18805	0	12.7822	8.79345	4.15698	7.40648	9.28118	3.91014	0
231.2/5.4 (13479)	231.171	5.45	13479	24.7104	3.63971	0	0	0	0	0	0	0	0	0	0	0	0	0	0	0	3.94512	73.1774	28.0113	0	77.1175	1.37436	0	0	0	0	0.343431	26.0231	0	0	0	0	0	0	0	0	0	0	0	0	0	0	0	0	0
231.2/1.8 (13480)	231.171	1.82	13480	0	0	0	32.6764	0	0	0	0	0	0	0	0	0	0	0	0	0	0	0	0	4.58694	0	0	0	0	0	0	6.788	0	0	0	0	0	0	0	0	0	0	0	0	0	0	0	0	0	0
231.2/2.2 (13481)	231.172	2.2	13481	0	0	0	0	11.169	0	0	0	0	0	0	0	0	0	0	13.2378	0	0	0	0	0	0	0	0	0	1.31018	0	0	0	0	0	0	0	0	0	0	0	0	0	0	0	0	0	0	0	0
232.0/1.5 (13497)	232.002	1.46	13497	0	0	0	0	0	0	0	0	0	31.9005	0	0	2.41477	43.7475	0	0	0	0	0	0	0	0	0	0	0	0	0	0	0	0	0	0	0	0	0	0	0	0	0	0	0	0	0	0	0	0
232.0/2.9 (13503)	232.025	2.86	13503	0	0	0	0	0	0	0	29.64	0	0	0	8.58701	42.4423	0	0	24.5281	0	0	28.5163	4.16854	6.23173	0.858979	18.4423	0	72.2111	7.0516	53.413	0	0	5.72219	0	0	0	0	0	0	0	0	0	0	0	0	0	0	0	0
232.0/1.9 (13507)	232.026	1.85	13507	0	0	0	0	0	0	0	0	0	6.03436	0	0	0	0	0	7.4103	0	0	0	0	17.3589	0	22.8403	0	60.8241	0	0	0	0	0	0	0	0	0	0	0	0	0	0	0	0	0	0	0	0	0
232.0/1.5 (13511)	232.027	1.49	13511	33.8726	93.2971	28.3804	0	53.8106	34.3319	0	0	59.8181	0	0	8.10771	18.9724	0	15.6583	40.5292	41.6135	0	14.875	0	55.1946	0	72.3223	80.9669	57.9927	48.8121	14.9922	10.2675	0	32.166	0	0	0	0	0	0	0	0	0	0	0	0	0	0	0	0
232.0/9.1 (13513)	232.027	9.08	13513	0	0	0	131.196	6.48041	5.60606	0	6.86878	0	6.94365	0	0	0	0	5.76847	10.5161	8.33909	0	0	0	13.0291	0	0	0	0	0	0	0	0	0	0	0	0	14.7011	0	14.7547	24.2671	0	27.423	0	0	0	0	0	0	0
232.0/1.6 (13523)	232.029	1.6	13523	0	0	12.1861	0	0	0	0	0	0	0	0	0	0	0	0	0	0	0	0	0	0	0	4.95301	0	0	0	0	0	0	4.81946	0	0	0	0	0	0	0	0	0	0	0	0	0	0	0	0
232.1/2.9 (13529)	232.095	2.93	13529	0	0	0	0	0	0	0	0	0	0	0	0	0	0	0	0	0	0	29.9613	14.8792	0	0	1.37753	12.5088	33.0616	0	40.6188	0	0	0	0	0	0	0	0	0	0	0	0	0	0	0	0	0	0	0
232.1/1.5 (13543)	232.128	1.53	13543	0	0	0	0	0	0	0	0	0	0	0	0	0	0	0	0	38.7832	0	0	0	0	0	2.5617	0	0	0	0	0	0	14.6677	0	0	0	0	0	0	0	0	0	0	0	0	0	0	0	0
232.1/1.4 (13545)	232.128	1.41	13545	67.9035	33.2565	56.8328	0	30.5253	30.8922	0	0	0	0	0	0.678175	0	0	1.52992	37.288	0	10.2954	8.5377	0	0	0	0	0	0	0	0	45.1776	17.7843	0	0	0	0	0	0	0	0	0	0	0	0	0	0	0	0	0
233.1/7.8 (13580)	233.077	7.85	13580	72.6906	69.849	129.333	70.2439	91.1159	85.2349	0	82.8433	98.3801	0	107.679	91.5402	79.7155	43.866	66.1136	79.7567	84.6844	0	42.2707	51.1661	52.6449	44.4312	89.5031	54.731	53.4778	55.6979	47.8724	94.7626	95.2268	138.984	330.783	345.612	351.061	256.746	246.759	275.096	234.461	242.415	250.772	191.993	204.133	232.859	185.281	254.27	247.252	262.71
233.1/1.3 (13581)	233.078	1.32	13581	0	0	0	0	0	0	0	0	0	0	0	0	0	0	0	0	0	0	28.6259	6.68433	0	0	8.43679	6.48523	2.66563	0	0	0	0	0	0	0	0	0	0	0	0	0	0	0	0	0	0	0	0	0
233.1/7.8 (13582)	233.08	7.84	13582	0	0	0	0	0	0	78.3574	0	0	69.9221	0	0	0	0	0	0	0	82.1465	0	0	0	0	0	0	0	0	0	0	0	0	0	0	0	0	0	0	0	0	0	0	0	0	0	0	0	0
233.1/1.7 (13588)	233.112	1.68	13588	0	0	0	0	0	3.70662	0	0	0	2.01459	0	0	0	0	0	75.425	73.9753	0	12.4925	0	7.26055	13.9937	66.9381	1.01618	0	0	0	78.0117	28.2419	46.3893	0	0	0	0	0	0	0	0	0	0	0	0	0	0	0	0
233.1/1.1 (13590)	233.113	1.09	13590	272.487	356.536	388.656	198.579	327.502	426.626	96.1236	73.1605	62.6889	77.0974	100.627	113.481	81.8123	167.518	114.51	438.374	447.712	0	196.388	173.968	190.699	156.856	167.107	116.621	71.0634	147.156	100.934	688.584	508.199	643.492	0	0	0	0	0	0	0	0	0	0	0	0	0	0	0	0
233.1/5.8 (13598)	233.124	5.77	13598	111.531	43.4025	50.9228	8.00916	53.146	0	32.6114	45.693	49.0752	0	42.8456	51.1256	42.9565	39.5717	74.8178	66.4035	48.1597	0	0	0	0	0	0	0	0	0	0	76.4987	88.0592	55.1443	0	0	0	0	0	0	0	0	0	0	0	0	0.742567	0	0	0
233.1/2.6 (13609)	233.148	2.56	13609	0	7.82524	8.80848	469.601	0	0	0	0	0	0	0	0	0	0	61.6658	0	0	0	0	0	0	0	0	0	0	0	0	0	0	0	0	0	0	0	0	0	0	0	0	0	0	0	0	0	0	0
233.1/1.8 (13611)	233.148	1.83	13611	328.262	0	0	75.7256	0	0	0	0	0	0	0	3.69039	0	9.80671	0	0	0	0	0	0	0	0	0	0	0	0	0	0	0	0	0	0	0	0	0	0	0	0	0	0	0	0	0	0	0	0
233.1/2.8 (13612)	233.148	2.8	13612	519.52	441.892	440.224	746.729	542.26	421.491	21.3171	0	13.9056	11.8612	4.53325	22.6872	0	16.4533	0	179.723	19.0813	0	25.1158	6.40663	154.839	0	3.86652	14.4156	15.1818	0	29.8577	63.6839	0	512.178	0	0	0	0	0	0	0	0	0	0	1.52771	0	13.6076	0	0	0
233.1/1.1 (13613)	233.149	1.13	13613	461.159	621.879	764.3	1161.1	784.953	876.693	45.0672	0	22.4361	25.7754	19.764	44.0725	61.5166	58.1371	44.8818	460.585	373.975	0	101.376	103.478	115.828	48.8227	72.904	1.41623	0	57.5868	0	790.005	772.044	934.289	0	0	0	0	0	0	0	1.21253	0	0	18.6633	2.77748	26.5636	29.9706	22.6822	0
233.1/3.0 (13614)	233.149	3.04	13614	877.585	830.629	617.114	0	473.07	550.264	61.1822	36.7931	59.1452	0	53.5582	70.6812	121.58	187.241	166.393	62.3085	110.641	0	141.811	64.701	88.4863	93.4325	84.4515	27.0893	0	39.8814	14.0233	520.932	664.4	50.4431	0	0	0	0	0	0	0	0	1.3925	4.0228	3.19929	4.50229	0	0	0	0
233.1/1.6 (13616)	233.149	1.58	13616	0	0	195.577	0	0	0	14.8609	7.29494	11.9061	0	11.5904	0	9.8946	0	0	264.148	258.299	0	0	0	48.2132	0	30.9148	6.00625	0	0	0	0	0	279.552	0	0	0	0	0	0	0	0	0	0	0	0	0	0	0	0
233.1/1.4 (13617)	233.149	1.4	13617	363.811	81.1842	0	17.5051	106.273	116.547	0	3.59553	0	0	1.87278	16.0384	0	14.507	29.3616	0	0	80.5629	94.7762	22.0255	0	84.5338	3.37483	0	0	16.9265	28.3927	409.62	440.202	0	0	0	0	0	0	0	0	0	0	0	0	0	0	0	0	0
233.2/3.0 (13622)	233.151	3.05	13622	0	0	0	0	0	0	0	0	0	70.787	0	0	0	0	0	0	18.9721	48.1076	0	0	0	0	0	0	0	0	0	0	0	0	0	0	0	0	0	0	0	0	0	0	0	0	0	0	0	0
233.2/8.3 (13624)	233.153	8.28	13624	0	0	0	0	0	0	0	0	0	0	0	0	0	0	0	0	0	0	35.9697	25.9227	31.1595	60.9079	55.4564	33.7547	24.3628	37.2236	23.3862	0	0	0	0	0	0	0	0	0	0	0	0	0	0	0	0	0	0	0
233.2/14.4 (13629)	233.191	14.35	13629	0	0	0	0	0	0	0	0	0	0	1.38294	0	0	0	0	0	0	0	0	0	0	0	0	0	0	0	0	0	0	0	0	0	0	0	0	0	0	0	0	0	0	3.47926	0	0	0	3.79677
234.1/3.5 (13640)	234.077	3.47	13640	0	0	0	3.04433	0	0	0	0	0	0	0	0	6.73562	0	0	0	0	0	1.39529	1.5479	0	0	0	22.1648	12.2783	11.9055	5.75783	0	0	0	0	0	0	0	0	0	0	0	0	0	0	0	0	0	0	0
234.1/8.0 (13646)	234.083	8.01	13646	0	0	0	38.3286	0.973038	0	0	0	0	0	0	0	0	0	0	2.26532	0	0	0	0	0	0	0	0	0	0	0	0	2.45777	0	0	0	0	0	0	0	0	0	0	0	0	0	0	0	0	0
234.1/3.9 (13658)	234.133	3.95	13658	6.65487	0	0	0	0	0	28.9519	33.9301	48.5577	0	37.4425	26.6189	42.3403	0	94.0041	3.88394	0	0	0	0	0	0	0	0	3.46995	0	3.93579	0	0	0	0	0	0	0	0	0	0	0	0	0	0	0	0	0	0	0
234.2/13.2 (13668)	234.16	13.15	13668	113.193	0	64.1437	43.2248	0	0	0	183.251	205.371	0	215.965	0	137.019	0	102.332	126.045	78.4784	0	33.2781	52.7461	68.2359	29.8726	77.0892	60.5538	53.3111	43.8498	33.4696	65.8656	41.4429	0	72.2091	214.434	192.167	0	144.912	104.184	179.434	149.256	174.235	179.998	142.404	183.299	203.351	209.079	225.368	184.876
234.2/13.2 (13669)	234.163	13.18	13669	0	143.006	0	0	76.1415	55.938	165.97	0	0	155.665	0	180.839	0	57.6811	0	0	0	162.407	0	0	0	0	0	0	0	0	0	0	0	54.6998	0	0	0	186.918	0	0	0	0	0	0	0	0	0	0	0	0
235.1/3.4 (13695)	235.106	3.43	13695	0	0	0	0	0	0	0	0	0	26.4697	0	0	0	0	0	0	0	3.52117	0	44.0537	0	0	0	0	0	0	0	0	0	33.9749	0	0	0	0	0	0	0	0	0	0	0	0	0	0	0	0
235.1/3.9 (13697)	235.106	3.86	13697	236.815	0	126.938	0	45.0558	0	0	0	0	0	0	0	0	0	307.467	201.14	104.465	0	264.603	0	159.73	270.692	195.704	168.153	226.473	0	158.244	99.2997	308.75	60.1605	0	0	0	0	0	0	0	0	0	0	0	0	0	0	0	0
235.1/3.7 (13698)	235.107	3.68	13698	6.89005	115.895	4.18513	62.5231	45.9644	0	71.2207	142.183	203.026	0	159.121	141.016	135.245	83.2999	0	27.207	55.7399	0	0	74.2224	0	20.8071	15.5095	6.07461	1.40939	117.952	342.189	57.1893	12.2003	0	0	0	0	0	0	0	0	0	0	0.910231	0	0	0	0	0	0
235.1/2.8 (13699)	235.107	2.75	13699	28.9327	25.3399	0	0	0	37.9679	27.7381	22.0675	18.3118	37.9336	38.4898	30.1702	0	0	48.2983	0	0	0	0	0	0	0	0	0	0	31.4842	0	0	0	0	0	0	0	0	0	0	0	0	0	0	0	0	0	0	0	0
235.1/4.2 (13700)	235.107	4.16	13700	127.183	0	75.228	0	22.4675	0	0	0	107.332	0	0	0	0	0	147.131	118.395	80.812	0	129.129	0	87.1903	131.752	113.848	75.9316	115.31	0	0	97.2998	145.697	0	0	0	0	0	0	0	0	0	0	0	0	0	0	0	0	0
235.1/2.9 (13701)	235.107	2.89	13701	26.5075	0	28.7577	0	42.1546	0	0	0	0	0	0	0	35.8104	0	0	51.1265	46.1554	0	65.4469	31.1086	29.3152	0	35.6324	43.675	69.3212	0	78.3045	11.6048	0	62.771	0	0	0	0	0	0	0	0	0	0	0	0	0	0	0	0
235.1/3.8 (13705)	235.109	3.78	13705	0	0	0	0	0	46.7606	0	0	0	119.627	0	0	0	0	0	0	0	59.3656	0	0	0	0	0	0	0	0	0	0	0	0	0	0	0	0	0	0	0	0	0	0	0	0	0	0	0	0
235.1/4.1 (13707)	235.109	4.06	13707	0	0	0	0	0	2.25402	49.7164	0	0	40.7791	0	0	0	0	0	0	0	18.0845	0	0	0	0	0	0	0	0	0	0	0	0	0	0	0	0	0	0	0	0	0	0	0	0	0	0	0	0
235.1/1.0 (13709)	235.111	1.03	13709	0	0	0	0	0	0	0	0	0	0	0	0	0	0	0	0	0	0	0	39.2037	0	38.0529	29.3278	63.3666	0	4.14295	0	0	0	0	0	0	0	0	0	0	0	0	0	0	0	0	0	0	0	0
235.1/1.3 (13711)	235.118	1.33	13711	0	0	0	1095.69	0	0	0	0	0	0	42.6269	0	30.0003	0	0	11.7593	21.5768	0	12.6805	0	0	0	0	41.7927	0	0	0	0	0	155.027	0	0	0	0	0	0	0	0	0	0	0	0	1.98598	0	0	0
235.1/1.1 (13712)	235.119	1.14	13712	1252.09	972.674	1012.57	1369.64	1004.29	0	1406	1268.93	1399.17	1349.63	1250.61	1363.81	1216.86	1402.5	1634.86	1363.67	1191.88	0	1166.06	933.957	891.609	1210.26	1157.04	1113.57	1332.3	1146.85	1502.44	1248.37	1669.2	1201.84	0	0	0	0	0	0	31.7293	36.0504	33.1375	23.948	30.5267	20.8827	38.7327	27.7548	40.109	0
235.1/7.0 (13714)	235.143	7	13714	5.94126	0	0	0	0	0	0	0	0	0	0	0	0	0	0	0	0	0	140.588	149.508	272.203	411.623	117.961	163.255	28.73	111.954	109.235	0	0	0	0	0	0	0	0	0	0	0	0	0	0	0	0	0	0	0
235.1/7.3 (13715)	235.144	7.35	13715	0	0	0	0	0	0	0	0	0	0	0	0	0	0	0	0	0	0	2103.63	1447.95	1349.91	2032.34	502.451	786.251	166.094	639.81	908.616	0	0	0	0	0	0	0	0	0	0	0	0	0	0	0	0	0	0	0
235.2/13.9 (13721)	235.168	13.88	13721	95.4839	64.5371	68.3373	47.9955	67.329	60.3201	0	75.249	77.2445	0	83.3712	85.8347	67.6646	59.5632	64.9991	75.971	68.3798	0	32.4372	64.4092	59.9738	36.0133	72.522	65.5594	64.4545	46.9678	25.4437	65.3802	65.0394	50.3172	48.434	76.0628	70.721	71.8582	69.9134	57.3136	78.0262	72.9038	62.7327	73.0739	58.1027	69.9278	72.2273	75.9787	65.0065	71.4604
235.2/13.8 (13723)	235.173	13.85	13723	0	0	0	0	0	0	66.2096	0	0	72.7282	0	0	0	0	0	0	0	71.2857	0	0	0	0	0	0	0	0	0	0	0	0	0	0	0	0	0	0	0	0	0	0	0	0	0	0	0	0
236.0/1.2 (13737)	236.005	1.23	13737	0	0	0	0	0	0	0	0	6.41517	58.6888	0	0	29.1752	277.895	0	0	0	0	0	0	0	0	0	0	0	0	0	0	0	0	0	0	0	0	0	0	0	0	0	0	0	0	0	0	0	0
236.0/2.2 (13738)	236.006	2.16	13738	0	0	0	0	0	0	1.80075	0	0	2.11432	0	3.99885	0	141.675	0	0	0	0	0	0	0	0	0	0	0	0	0	0	0	0	0	0	0	0	0	0	0	0	0	0	0	0	0	0	0	0
236.1/1.2 (13742)	236.066	1.2	13742	0	0	0	0	0	0	0	0	5.77	0	0	0	0	0	8.53624	0	26.134	0	12.5503	0	0	0	0	0	0	0	4.94498	0	54.9073	34.7142	0	0	0	0	0	0	0	0	0	0	0	0	0	0	0	0
236.1/2.5 (13743)	236.066	2.48	13743	0	0	0	0	0	0	0	0	0	0	0	0	0	2.85836	0	39.9802	0	0	0	0	5.52467	0	0	0	0	0	0	0	0	0	0	0	0	0	0	0	0	0	0	0	0	0	0	0	0	0
236.1/1.1 (13747)	236.088	1.1	13747	0	0	0	0	0	0	0	0	0	0	0	0	0	0	0	0	0	0	0	0	0	0	0	0	0	0	0	0	0	0	0	0	0	0	0	0	0	0	0	30.4521	25.3243	17.1276	40.9014	14.7236	23.86	0
236.1/4.1 (13752)	236.109	4.1	13752	7.10146	4.24023	0	0	0	2.72096	0	6.57584	21.3106	4.8552	9.00667	8.46521	0	0.734617	35.4458	9.78129	11.3524	0	13.8704	1.18723	7.13356	14.8338	7.5533	8.13163	13.954	0	0	2.84584	6.39863	0	0	0	0	0	0	0	0	0	0	0	0	0	0	0	0	0
236.1/8.4 (13761)	236.127	8.39	13761	36.1719	20.1769	24.0125	19.9233	20.5784	23.317	0	11.595	16.3659	0	18.4755	12.628	15.7049	8.34899	26.9702	26.4484	22.6602	0	23.4432	15.833	19.7159	26.2498	23.2706	18.3298	22.3338	18.3964	27.2375	23.7962	20.8722	0	0	0	0	0	0	0	0	0	0	0	0	0	0	0	0	0
236.1/8.4 (13763)	236.131	8.37	13763	0	0	0	0	0	0	12.6016	0	0	19.7912	0	0	0	0	0	0	0	22.1907	0	0	0	0	0	0	0	0	0	0	0	13.9615	0	0	0	0	0	0	0	0	0	0	0	0	0	0	0	0
236.1/1.0 (13767)	236.149	1	13767	0	0	0	0	0	0	211.856	250.449	268.6	163.907	249.806	219.099	257.994	210.77	243.459	0	0	0	26.8653	0	31.5151	43.3246	36.1079	38.565	22.768	0	73.7263	0	0	0	0	0	0	0	0	0	0	6.28376	4.12008	0	0	2.15207	0	0.463172	0	0
236.2/12.9 (13770)	236.16	12.94	13770	0	0	0	0	0	0	0	0	0	0	0	1.29626	0	0	0	0	0	0.400807	0	0	0	0	0	0	0	0	0	0	0	0	0	0	0	0	0	0	0	0	0	0	0	4.84368	0	0	0	0
236.2/10.2 (13773)	236.162	10.2	13773	0	14.9415	2.98088	0	5.34628	2.15984	16.4892	51.7631	11.7974	0	46.4911	39.1225	0	0	0	0	1.62755	0	0	0	0	0	8.27335	0	0	0	0	0	0	0	34.5167	204.668	68.9192	84.3192	37.9776	35.8641	83.3045	82.5299	69.174	65.3301	53.6821	72.2958	162.31	82.7838	186.399	49.1816
236.2/13.7 (13784)	236.165	13.73	13784	2.61373	0	0	7.92248	0	0	0	0	0	0	0	0	0	0	0	0	0	0	21.9987	14.6239	0	7.01793	0	10.0875	0	11.3973	3.45777	0	13.9153	0	3.04502	0	0	0	0	4.98772	0	0	0	0	0	0	0	0	0	0
236.2/13.7 (13806)	236.169	13.68	13806	2.75757	0	0	6.39064	0	0	0	0	0	0	0	0	0	0	0	0	0	0	0	6.13283	0	0	0	4.34437	10.5531	2.68999	0	3.27258	0	0	0	0	0	0	0	0	0	0	0	0	0	0	0	0	0	0
236.9/1.3 (13825)	236.939	1.29	13825	0	0	0	33.5124	0	0	0	0	0	0	0	0	0	0	0	0	0	0	0	0	0	0	0	0	0	0	0	0	10.6828	52.7593	0	0	0	0	0	0	0	0	0	0	0	0	0	0	0	0
237.0/1.1 (13834)	236.995	1.09	13834	0	0	0	0	103.802	92.0362	23.9086	16.6508	0	0	4.50419	0	0	0	0	0	0	0	0	43.6508	0	0	0	0	0	80.737	0	0	0	36.1694	0	0	0	0	0	0	0	0	0	0	0	0	0	0	0	0
237.0/1.1 (13836)	236.998	1.12	13836	140.79	63.2214	90.4421	0	0	0	0	0	37.525	0	0	17.9061	0	0	80.2708	188.205	173.583	20.0271	181.318	0	40.8921	105.219	236.481	182.977	135.858	0	64.1527	152.865	72.502	0	0	0	0	0	0	0	0	0	0	0	0	0	5.52349	0.399892	1.40505	0
237.0/1.2 (13837)	237.003	1.25	13837	0	0	0	0	0	0	2.14182	1.2877	0	0	0	0	3.53213	0	0	0	0	0	0	0	0	0	1.50924	0	0	0	0	0	0	0	0	0	0	0	0	0	0	0	0	0	0	0	0	0	0	0
237.1/4.8 (13840)	237.051	4.8	13840	0	0	0	0	0	0	0	0	0	0	0	0	0	0	0	0	0	0	0	0	0	0	0	0	0	0	0	0	0	0	0	0	0	0	0	0	5.27003	11.3422	32.8884	7.18495	0	0	0	0	0	0
237.1/2.6 (13845)	237.085	2.59	13845	0	0	0	0	0	0	0	0	0	0	0	0	165.587	0	0	0	2.31794	0	0	9.40953	0	0	0	0	0	8.75111	0	0	0	0	0	0	0	0	0	0	0	0	0	0	0	0	0	0	0	0
237.1/1.6 (13848)	237.086	1.55	13848	245.92	119.481	146.179	181.203	104.526	138.173	0	197.85	212.398	125.231	217.994	195.422	187.295	0	189.795	224.308	239.469	0	279.431	169.081	178.362	189.115	253.772	248.989	269.025	233.004	341.531	309.907	170.319	0	0	0	0	0	0	0	0	0	0	0	0	0	0	0	0	0
237.1/2.4 (13849)	237.086	2.44	13849	0	0	0	0	0	9.31224	165.42	133.026	175.628	0	110.024	66.9572	2.46837	0	118.737	0	0	6.17645	0	0	0	0	0	0	0	0	0	0	0	9.52035	0	0	0	0	0	0	0	0	0	0	0	0	0	0	0	0
237.1/1.1 (13854)	237.087	1.12	13854	119.592	110.889	112.144	171.878	0	125.282	295.792	304.967	299.222	247.834	288.048	299.461	246.277	293.309	317.046	160.381	139.581	148.621	199.306	154.801	176.335	188.376	168.718	177.859	248.009	180.136	226.672	197.622	216.602	206.979	0	0	0	0	0	0	1.40097	3.05301	0	5.13416	0	0	3.53342	3.9573	2.48024	0
237.1/1.5 (13856)	237.089	1.52	13856	0	0	0	0	0	0	0	0	4.36495	0	0	0	3.50656	236.719	8.19072	0	0	100.385	3.4783	0	9.80103	0	0	0	0	0	0	0	0	8.15436	0	0	0	0	0	0	0	0	0	0	0	0	0	0	0	0
237.1/3.2 (13864)	237.121	3.19	13864	317.626	0	0	0	0	0	0	0	0	0	0	0	13.8657	0	21.5053	0	0	0	10.0077	0	25.6899	0	0	21.7744	21.9918	14.3623	19.5119	0	0	0	0	0	0	0	0	0	0	0	0	0	0	0	0	0	0	0
237.1/3.0 (13867)	237.122	2.96	13867	744.148	548.282	103.399	0	0	259.638	75.4401	19.2193	23.3017	50.5366	57.871	79.9122	99.3028	222.288	118.095	111.15	47.3944	19.0631	27.011	3.30409	2.49052	0	0	0	15.3628	2.46195	22.9883	0	8.39336	114.099	0	0	0	0	0	0	0	0	0	0	0	0.847456	0	0	0	0
237.1/3.3 (13866)	237.122	3.32	13866	0	0	0	750.651	0	0	0	0	0	0	0	0	0	0	0	0	32.8873	0	0	0	0	0	14.4454	18.2116	0	0	0	0	0	0	0	0	0	0	0	0	0	0	0	0	0	0	0	0	0	0
237.1/3.5 (13865)	237.122	3.45	13865	442.455	435.276	381.205	0	401.168	376.169	38.0848	0	27.6735	35.6344	23.7556	43.0665	51.394	84.8595	53.7441	61.7585	37.5985	51.3141	12.0067	9.35968	12.8368	11.5234	2.90974	0	1.70083	0	3.97716	328.947	339.587	308.606	0	0	0	0	0	0	0	0	0	3.87127	6.18145	7.98359	1.60977	0	1.64491	0
237.1/1.9 (13869)	237.123	1.89	13869	112.054	0	0	0	0	0	0	0	0	0	0	0	0	0	0	1.57608	0	0	0	0	0	0	0	2.8276	0	0	0	0	0	0	0	0	0	0	0	0	0	0	0	0	0	0	0	0	0	0
237.1/2.7 (13868)	237.123	2.7	13868	0	0	35.651	745.782	66.9437	28.0903	0	0	0	0	0	0	0	0	2.12882	0	0	11.324	0	0	0	0	0	0	0	0	0	0	0	0	0	0	0	0	0	0	0	0	0	0	0	0	0	0	0	0
237.1/3.1 (13870)	237.123	3.07	13870	0	0	200.04	0	301.874	0	0	0	0	0	5.01844	0	0	0	0	0	0	0	8.11976	9.80678	0	42.216	0	0	0	26.7022	0	336.484	586.838	0	0	0	0	0	0	0	0	0	0	0	0	0	0	0	0	0
237.2/13.7 (13903)	237.184	13.73	13903	25.0616	15.8232	9.69357	8.33541	10.1423	4.9239	13.5103	16.8413	17.806	4.56555	18.1229	13.8107	16.3807	24.0077	15.1929	18.3765	13.0626	0	9.11761	17.0901	20.415	0	28.4528	13.1549	23.8357	13.1616	0	16.7378	13.5474	8.15049	8.55865	17.4551	10.6099	19.4989	19.5612	14.2254	15.611	14.5955	12.1653	16.9101	15.043	17.5085	16.503	17.7794	8.79844	17.0581
237.2/14.2 (13904)	237.219	14.15	13904	26.5441	0	0	0	0	0	0	0	0	0	1.73885	0	0	0	0	0	4.71767	0	0	0	0	0	0	0	0	0	0	0	3.22694	0	0	0	0	0	0	0	0	0	0	0	0	0	0	0	0	0
237.2/15.4 (13907)	237.221	15.43	13907	0	0	0	3.02512	0	1.35661	0	0	0	0	0	0	0	0	0	0	0	0	2.68018	0	0	0	0	0	0	0	27.6738	0	0	0	0	0	0	0	0	0	0	0	0	0	0	0	0	0	0	0
237.2/15.7 (13908)	237.221	15.67	13908	45.7735	0	0	0	0	0	0	0	0	0	0	0	0	0	0	0	0	5.17459	0	0	0	0	0	0	0	0	0	2.15259	0	0	0	0	0	0	0	0	0	0	4.13102	0	0	0	0	0	0	0
237.2/14.4 (13909)	237.221	14.44	13909	247.146	0	0	1.81012	0	0	0	0	0	0	0	0	0	0	0	2.92491	0	0	0	5.03424	0	0	0	0	0	0	0	0	0	0	0	0	0	0	0	3.4023	0	0	0	0	0	0	0	0	0	0
238.0/1.1 (13923)	238.037	1.08	13923	44.9397	47.3451	57.2214	0	54.7025	67.0296	84.4318	100.178	94.0667	154.71	97.8895	114.68	142.312	154.934	84.0167	50.5178	68.4886	0	89.5315	68.033	80.3877	60.7765	86.2754	81.7177	111.061	75.1349	98.4166	65.8631	44.7677	0	0	0	0	0	0	0	0.402948	0	0	0	0	0	0	0	0	0
238.1/1.4 (13928)	238.073	1.43	13928	0	0	0	0	0	0	3.14972	0	0	0	7.88846	1.70251	0	0	4.39205	0	0	0	0	0	0	0	2.02316	4.3249	2.71648	2.95741	0	4.60219	0	0	0	0	0	0	0	0	0	0	0	0	0	0	0	0	0	0
238.1/1.0 (13929)	238.079	1.04	13929	0	0	0	0	0	0	9.12475	12.3288	5.52612	0	0	0	12.0829	0	18.5904	0	0	7.50598	7.49587	0	16.1914	0	7.52807	9.89978	0	16.2151	15.9254	0	0	0	0	0	0	0	0	0	0	0	0	0	0	0	0	0	0	0
238.1/6.3 (13940)	238.107	6.29	13940	15.981	10.0647	1.84445	0	0	0	6.07793	13.9643	18.81	4.73399	17.4113	18.8182	14.1433	9.95424	28.7917	14.7706	15.6161	6.04984	15.5671	0	11.8034	17.4832	13.9827	15.0661	14.6203	0.868093	24.6752	13.2603	11.5383	0	0	0	0	0	0	0	0	0	0	0	0	0	0	0	0	0
238.2/9.4 (13952)	238.177	9.36	13952	25.2981	33.197	39.1534	0	4.44892	4.30945	19.6019	29.0522	17.0735	0	33.012	26.0966	8.70837	0	3.14498	19.3305	22.4082	0	0	0	14.2795	0	26.4279	0	6.79867	0	0	27.6076	0	0	84.5867	173.515	188.495	50.6345	24.3853	50.2561	141.763	136.827	127.739	159.404	128.328	138.477	163.569	205.396	141.427	150.848
238.2/13.7 (13954)	238.221	13.67	13954	0	0	0	0	0.963625	0	0	0	0	0	0	0	0	0	0	0	0.825818	0	0	0	0	0	0	0	0	0	0	0	0	0	0	0	0	0	0	0	0	2.27741	0	0	0	0	0	0	0	0
239.0/1.5 (13961)	238.97	1.52	13961	0	37.5526	0	0	2.6655	0	0	47.407	105.79	0	84.0767	106.831	321.551	0	14.2383	31.9277	28.8482	0	0	0	42.5343	0	53.6321	37.7995	40.334	12.5763	0	0	0	0	0	0	0	0	0	0	0	0	0	0	0	0	0	0	0	0
239.0/1.3 (13962)	238.97	1.31	13962	0	1.48037	0	0	0	0	0	1.0548	2.51733	8.42975	1.10274	2.12801	13.346	0	0	0	0	0	0	0	0	0	0	0	0	0	0	0	0	0	0	0	0	0	0	0	0	0	0	0	0	0	0	0	0	0
239.1/1.1 (13971)	239.059	1.1	13971	0	0	0	0	18.4879	0	0	0	0	0	0	0	47.044	55.0425	0	0	32.9639	0	0	0	0	0	0	0	0	0	0	0	0	0	0	0	0	0	0	0	0	0	0.942956	0	0	0	0	0	0	0
239.1/1.1 (13972)	239.062	1.09	13972	19.1981	0	0	0	0	0	77.7875	67.7148	54.8171	0	28.4552	56.3954	5.63972	14.1413	80.1583	43.2909	0	0	31.13	36.7412	27.996	40.1137	64.667	67.2703	86.0124	41.2884	42.9897	18.6026	14.4805	14.9431	0	0	0	0	0	0	0	0	0	0	0	0	0	0	0	0
239.1/4.5 (13974)	239.066	4.49	13974	0	0	0	0	0	0	0	0	0	0	0	0	0	0	0	0	0	0	0	0	0	0	0	0	0	0	0	0	0	0	0	0	0	0	0	0	1.29984	0	14.9566	13.9201	0	36.8117	0	0	0	0
239.1/6.1 (13984)	239.087	6.15	13984	1.30668	8.94418	0	0	4.71196	4.76017	0	0	0	0	0	18.9132	6.26007	1.49614	16.9829	29.8887	23.2996	0	20.425	0	16.9252	9.22381	0	19.8789	14.3688	0	13.5025	31.9942	40.9095	4.28517	0	2.89324	0	0	68.7424	0	64.3759	0	80.5585	75.8423	1.99491	67.1534	79.6628	0	96.6699	102.336
239.1/5.4 (13988)	239.088	5.37	13988	1.37959	0	0	0	0	0	0	0	0	0	0	0	0	0	0	0	0	0	0	0	0	0	0	0	0	0	0	1.01513	0	0	0	0	0	0	0	0	267.896	341.912	321.809	328.911	215.892	171.164	357.938	152.254	245.924	0
239.1/3.7 (13989)	239.088	3.72	13989	0	0	0	0	0	0	0	0	0	0	0	36.2294	11.2594	0	2.54523	0	0	0	0	0	0	0	0	0	0	0	0	0	0	0	0	0	0	0	0	0	29.8981	115.33	314.275	0	0	95.4192	8.87789	0	3.07895	4.02414
239.1/6.0 (13991)	239.088	6.03	13991	0	0	18.2149	0	7.0808	0	0	0	20.7162	0	24.4517	0	0	3.47766	0	0	0	0	0.567548	10.5902	0	0	9.64572	0	0	16.0668	0	0	0	0	63.3488	70.388	67.1202	62.9099	0	72.9748	0	54.2394	0	0	59.8368	1.54386	0	70.35	0	0
239.1/4.7 (14004)	239.102	4.67	14004	0	6.17534	0	0	0	4.89493	8.8007	3.71798	2.98736	4.99956	8.31462	6.62725	5.9394	0	25.0327	13.6172	2.22486	0	0	0	8.0389	13.1088	4.00266	7.17277	26.9892	0	0	6.59923	5.14979	0	0	0	0	0	0	0	0	0	0	0	0	0	0	0	0	0
239.1/1.6 (14006)	239.102	1.58	14006	24.6252	14.0722	0	0	0	0	0	0	0	0	0	0	5.80628	0	0	0	77.1056	0	0	0	0	0	16.1635	0	0	0	17.721	15.0781	0	167.056	0	0	0	0	0	0.465404	0	0	0	0	0	0	0	0	0	0
239.1/4.5 (14005)	239.102	4.45	14005	0	0	0	0	0	0	0	0	0	0	0	1.76252	0	0	0	0	0	0	19.1198	0	4.08101	2.45189	0	0	0	4.04193	18.8934	0	0	0	0	0	0	0	0	0	0	0	0	0	0	0	0	0	0	0
239.1/1.1 (14007)	239.102	1.12	14007	219.086	169.425	172.403	218.538	145.97	158.59	0	28.6515	25.5402	0	35.2352	19.5526	27.9102	23.8312	31.1302	139.637	117.186	136.934	59.7291	39.5524	33.3847	48.1316	45.1375	27.3433	30.3731	20.4139	28.077	198.499	264.337	230.094	0	0	0	0	0	0	0	0	0	0	1.89697	0	0	0	0	0
239.1/1.4 (14008)	239.102	1.39	14008	150.56	67.9131	146.741	210.511	74.4589	97.9346	0	0	0	0	0	0	0	0	1.67446	78.9704	0	0	43.0092	0	17.0844	24.2721	0	2.45604	0	2.92015	0	158.274	133.218	0	0	0	0	0	0	0	0	0	0	0	0	0	0	0	0	0
239.1/1.0 (14016)	239.137	1	14016	0	0	0	0	0	0	4.29087	0	0	0	0	0	0	0	0	0	0	0	0	0	9.407	0	0	0	0	0	0	0	0	0	0	0	0	0	0	0	0	0	0	0	0	0	0	0	0	0
239.2/12.9 (14022)	239.161	12.9	14022	10.1204	16.2761	4.53849	0	2.55151	0	20.9007	17.0998	16.3285	0	27.1322	21.3791	6.52893	0	5.75867	14.3865	3.944	0	0	0	0	0	7.70022	0	3.49204	0	0	3.37395	0	0.752113	6.03223	24.8266	20.3258	0	21.8165	10.2044	22.8066	23.0924	22.9962	24.4406	11.6646	22.1288	26.6787	22.723	29.8312	21.9415
239.2/14.1 (14024)	239.176	14.07	14024	10.335	2.39219	0	0	0	0	0	1.00431	0	2.96662	0	1.05256	0.45849	0	5.75611	7.49192	1.75318	0	10.1839	0	0	2.45908	0	5.10693	0	0	0	0	11.8738	3.75453	0	0	0	0	0	0	0	0	0	0	0	0	0	0	0	0
239.2/12.9 (14027)	239.199	12.92	14027	39.0028	21.8789	14.5556	3.67722	11.0617	5.87216	26.8797	27.5384	29.4904	20.4816	38.4595	26.9533	21.8704	7.53884	17.4311	19.9435	14.0536	20.8312	2.47859	4.02725	12.977	4.11898	18.2907	9.0884	9.20776	5.04607	2.14409	11.8807	3.03983	3.64186	15.087	32.5582	35.2495	32.8923	17.4708	18.0781	29.7001	29.7921	29.4429	31.7527	21.169	25.84	24.2096	36.5929	25.8581	24.7563
239.2/13.7 (14034)	239.237	13.68	14034	0	0	0	1.64223	0	8.5706	3.13055	0	0	1.17552	5.99125	0	0	21.9677	0	4.0874	17.9258	31.3022	0	22.8901	29.0853	0	0	0	0	3.81926	0	0	0	0	0	23.6921	0	50.7282	0	36.0524	0	0	0	0	34.1873	0	0	0	0	85.8966
239.2/13.8 (14035)	239.237	13.8	14035	12.0324	27.4963	16.9448	0	26.9415	16.4656	20.6905	28.5894	70.657	7.37201	26.1419	26.0395	55.9746	0	88.9105	33.9449	3.86752	0	42.2008	0	0	9.55092	25.2725	69.9996	27.6828	7.28067	50.0969	31.0872	21.8321	28.3558	26.3581	0	30.0249	0	54.0849	0	74.4507	19.9287	93.9726	32.703	0	61.0349	34.1024	74.6371	34.8828	0
240.0/1.5 (14040)	239.971	1.52	14040	0	0	2.30587	0	0	0	1.8031	5.97963	14.9727	0	14.9565	15.2567	56.097	0	0	0	0	0	0	0	3.48705	0	5.8382	3.26354	0	0	0	0	0	0	0	0	0	0	0	0	0	0	0	0	0	0	0	0	0	0
240.1/12.2 (14043)	240.068	12.16	14043	64.0289	17.6541	13.2948	0	10.7158	0	0	0	0	0	0	0	0	0	0	26.8169	16.1985	0	0	0	0	0	0	0	0	0	0	21.4598	22.3908	4.93267	0	0	0	0	0	0	0	0	0	0	0	0	0	0	0	0
240.1/3.0 (14044)	240.085	2.95	14044	0	0	0	0	0	0	0	0	0	0	0	0	0	0	0	2.71788	0	0	0	0	0	0	32.3186	87.444	42.9073	0	4.57537	0	0	0	0	0	0	0	0	0	0	0	0	0	0	0	0	0	0	0
240.1/1.0 (14048)	240.095	1.01	14048	0	15.7761	12.4489	0	0	0	0	0	0	0	0	0	0	0	0	0	6.35996	0	0	0	0	0	0	0	0	12.1974	0	0	0	6.02863	0	0	0	0	0	0	0	0	0	0	0	0	0	0	0	0
240.1/1.1 (14051)	240.095	1.13	14051	0	0	0	0	0	0	33.2048	17.3771	35.5171	0	0	0	0	0	42.9635	44.3875	51.6646	0	97.6083	57.135	102.612	111.482	87.3773	68.8914	113.854	60.3389	126.51	0	22.4338	0	0	0	0	0	0	0	0	0	0	0	0	0	0	0	0	0
240.1/4.9 (14054)	240.097	4.85	14054	50.4385	38.8383	16.3388	0	0	12.3554	0	0	6.3497	0	0	0	3.91385	0	12.2131	40.0254	0	0	33.4388	0	19.3517	20.3678	23.0668	4.7099	47.8019	23.059	20.3998	18.931	34.952	0	0	0	0	0	0	0	0	0	0	0	0	0	0	0	0	0
240.1/2.8 (14056)	240.098	2.84	14056	1.8539	0	0	0	0	0	0	0	0	0	0	0	0	0	0	0	0	0	70.6322	0	0	0	11.6178	32.4802	0	0	0	0	0	0	0	0	0	0	0	0	0	0	0	0	0	0	0	0	0	0
240.1/1.0 (14068)	240.136	1.05	14068	0	0	0	0	0	0	2.4436	0	0	0	0	0	0	0	0	0	0	0	0	0	0	0	0	0	0	0	0	4.32991	0	0	0	0	0	0	0	0	0	0	0	0	0	0	0	0	0.608169	0
240.2/8.8 (14069)	240.156	8.83	14069	4.37179	0	0	0	0	0	0	0	1.91648	0	2.32339	0	0	0	0	0	1.19889	0	0	0	0	0	0	0	0	0	0	1.49379	0	0	15.5521	15.9094	11.2667	0	9.83263	2.46836	11.8679	0	11.5514	12.5947	5.72882	16.0869	7.07663	22.2521	14.6529	6.68203
241.0/1.5 (14077)	240.968	1.52	14077	0	5.3844	2.1825	0	0	0	4.49982	6.43276	17.1825	0	17.062	15.9502	61.6997	5.57898	0.942321	0	0	0	0	1.15007	0	0	12.8827	5.04912	0	0	0	0	0	0	0	0	0	0	0	0	0	0	0	0	0	0	0	0	0	0
241.0/1.0 (14087)	241.034	1.02	14087	0	0	0	0	0	0	37.9459	0	0	46.8886	0	0	0	73.9068	0	0	0	130.503	0	0	0	0	0	0	0	0	0	0	0	0	0	0	0	0	0	0	0	0	0	0	0	0	0	0	0	0
241.1/1.1 (14093)	241.081	1.13	14093	27.2023	33.4526	0	0	48.7887	0	81.268	77.9876	46.4838	0	78.6103	57.2605	38.9712	55.0173	65.9091	55.5982	86.5001	70.1697	49.4428	31.4368	30.2147	33.6408	37.8972	43.6699	91.8888	39.2778	57.8346	15.6101	81.33	52.2804	0	0	0	0	0	0	0	0	0	0	0	0	0	0	0	0
241.1/1.5 (14094)	241.081	1.54	14094	3.10535	6.67778	12.6038	0	0	4.08052	20.4266	17.0898	24.9439	0.533742	24.3762	8.44087	12.9263	0	0	22.1949	20.9052	1.70901	6.48627	19.8609	31.5186	0	49.9164	34.7151	23.5512	18.4084	12.8855	14.6208	0	14.8248	0	0	0	0	0	0	0	0	0	0	0	0	0	0	0	0
241.1/6.5 (14100)	241.103	6.47	14100	0	8.96052	18.3056	0	0	4.52217	0	18.1402	12.2716	4.65133	14.3843	14.0582	15.1781	7.6543	14.3653	12.5114	10.3823	0	11.8135	0	4.25371	7.46118	13.9635	13.2377	13.4354	5.24671	10.1004	5.34272	8.09313	13.5846	52.8577	59.0353	57.9408	43.131	41.1103	47.6329	47.3375	45.3935	46.8919	40.2436	41.6203	42.9535	30.4988	69.8964	44.7904	47.1517
241.1/5.8 (14103)	241.109	5.81	14103	0	0	0	0	0	0	0	10.0619	9.10091	0	16.5361	0	0	8.45271	21.5349	0	0	0	0	0	0	0	0	0	0	0	0	0	0	0	0	0	0	0	0	0	0	0	0	0	0	0	0	0	0	0
241.1/2.9 (14112)	241.117	2.92	14112	0	0	0	0	2.50888	0	0	0	0	0	0	0	0	0	0	0	0	0	4.35135	0	0	0	0	0	0.827748	0	0	0	2.97822	8.16448	0	0	0	0	0	0	0	0	0	0	0	0	0	0	0	0
241.1/3.5 (14114)	241.117	3.55	14114	0	0	0	0	0	0	0	0	1.51521	9.24893	0	0	0	0	1.70418	0	2.62069	0	0	4.40066	0	0	1.13223	0	2.39774	0	0	0.532684	0	0	0	0	0	0	0	0	0	11.0219	0	0	0	3.3706	11.2338	0	0	0
241.1/1.0 (14118)	241.118	1.05	14118	0	0	0	0	0	52.1147	9.07957	0	0	0	0	0	0	0	0	0	0	79.198	0	0	0	0	0	0	0	0	0	0	0	0	0	0	0	0	0	0	0	0	0	0	0	0	0	0	0	0
241.2/1.1 (14127)	241.152	1.14	14127	34.9342	48.1025	0	61.1533	54.1943	44.9143	0	90.2225	0	0	89.3001	89.9059	82.5354	0	0	0	64.0134	0	74.4605	50.0386	0	68.7448	0	80.4356	38.7158	61.6132	85.6696	61.0048	78.2671	60.2767	0	0	0	0	0	0	0	35.5909	0	0	0	0	0	0	0	0
241.2/1.1 (14129)	241.155	1.14	14129	0	0	52.8674	0	0	0	88.8139	0	95.1611	36.1004	0	0	0	96.3628	114.422	70.0986	0	47.4384	0	0	72.0237	0	67.1677	0	0	0	0	0	0	0	0	0	0	0	0	0	30.3251	0	42.0371	0	0	0	0	0	0	0
241.2/12.4 (14131)	241.176	12.43	14131	0	0	4.50652	0	0	0	0	0	0	0	0	4.71082	0	0	0	0	0	0	0	0	0	0	0	0	0	0	0	0	0	0	0	0	0	0	0	4.829	0	0	0	0	0	4.49531	0	10.3287	0	0
241.2/12.5 (14134)	241.179	12.53	14134	33.7038	0	3.35005	4.20192	0	0	5.02872	11.4514	14.7698	0	18.2085	0	1.88536	0	0	0	4.25066	0	0	0	1.6648	0	9.6317	0	1.50119	0	0	2.24481	0	1.35951	0	9.67661	5.21276	9.4423	5.55666	3.10008	2.34697	8.14704	0	5.46809	6.44565	14.7801	18.0913	0	7.25568	5.46402
242.0/1.4 (14149)	242.013	1.41	14149	0	0	0	0	0	0	0	0	10.1556	0	0	0	139.595	0	9.73402	0	0	0	0	0	0	0	0	0	0	0	18.9433	0	0	0	0	0	0	0	0	0	0	0	0	0	0	0	0	0	0	0
242.0/1.4 (14150)	242.016	1.38	14150	0	0	0	0	0	0	0	0	0	275.919	0	11.0323	0	246.883	0	0	0	0	0	0	0	0	0	0	0	0	0	0	0	0	0	0	0	0	0	0	0	0	0	0	0	0	0	0	0	0
242.0/1.1 (14153)	242.043	1.1	14153	0	0	0	0	0	0	0	0	0	0	0	0	0	0	0	0	0	0	5.29426	0	0	0	0	0	0	0	0	0	0	0	0	0	0	0	0	0	0	0	0	16.4485	9.99133	8.48781	12.6406	7.42521	4.43991	0
242.1/1.3 (14156)	242.05	1.33	14156	0	0	0	0	0	0	0	0	0	0	0	0	1.1408	6.02816	0	0	1.48365	1.1443	0	0	0	0	0	0	0	0	0	0	0	0	0	0	0	0	0	0	0	0	0	0	0	0	0	0	0	0
242.1/3.1 (14159)	242.096	3.08	14159	0	0	0	0	46.6134	0	0	0	0	0	0	0	0	0	0	0	0	0	0	0	0	0	0	2.02766	1.49092	0	0	0	0	0	0	0	0	0	0	0	0	0	0	0	0	0	0	0	0	0
242.1/1.4 (14160)	242.098	1.38	14160	0	0	30.4594	0	0	3.51823	0	0	0	0	0	0	0	0	0	0	5.88532	0	0	0	0	0	0	0	0	0	0	0	0	0	0	0	0	0	0	0	0	0	0	0	0	0	0	0	0	0
242.1/1.1 (14161)	242.098	1.12	14161	0	0	0	0	0	0	0	0	5.30802	0	14.318	0	0	0	0	0	9.0554	0	0	0	14.1624	0	0	0	0	1.87479	7.93799	0	0	0	0	0	0	0	0	0	155.57	105.63	37.0952	0	0	0	0	0	0	0
242.1/1.2 (14162)	242.098	1.23	14162	0	0	0	0	56.3231	0	14.6525	0	0	0	0	0	0	0	0	0	0	0	0	0	0	0	0	0	0	0	0	0	0	7.51315	0	0	0	0	0	0	0	0	0	0	0	0	0	0	0	0
242.1/3.1 (14164)	242.1	3.1	14164	54.5963	47.6177	30.7308	0	0	0	0	49.0413	0	0	48.2617	48.1249	51.4088	0	0	0	81.5884	0	0	2.89004	0	66.7548	9.67465	0	4.44879	0	0	48.4381	104.179	72.8253	0	0	0	0	0	0	0	90.4154	0	0	0	0	0	0	0	0
242.1/6.7 (14166)	242.102	6.66	14166	1.56432	2.48391	0.799568	0	0	0	6.00744	0	3.1721	0	2.63878	4.27328	1.96815	0	14.9066	0	0	0	0	0	2.11927	0	1.95761	0	4.83294	0	0	0	0	0	0	0	0	0	0	0	0	0	0	0	0	0	0	0	0	0
242.1/1.1 (14178)	242.147	1.14	14178	0	0	28.3565	36.758	24.8239	0	0	0	0	0	0	0	0	0	0	0	0	0	0	0	0	0	0	0	0	0	0	0	0	28.4552	0	0	0	0	0	0	0	0	0	0.752189	0	0	0	1.27305	0	0
242.1/3.8 (14179)	242.148	3.83	14179	136.435	0	50.2311	0	0	9.67277	0	0	56.5909	0	0	0	30.2768	0	150.466	131.477	82.1904	0	72.5146	0	32.5636	86.489	54.309	40.2978	58.9333	0	103.096	95.8524	144.351	0	0	0	0	0	0	0	0	0	0	0	0	0	0	0	0	0
242.1/3.0 (14181)	242.149	2.99	14181	0	0	27.2701	0	33.2498	0	0	0	0	9.13393	0	0	11.7358	0	0	6.73552	0	0	0	0	0	0	0	0	0	0	1.68716	13.3598	23.4638	0	0	0	0	0	0	0	0	0	0	0	0	0	0	0	0	0
242.1/3.7 (14183)	242.149	3.68	14183	0	57.4754	0	8.41612	21.9418	39.0543	37.8643	0	0	0	60.994	28.795	0	0	0	0	0	0	0	20.1014	0	0	0	0	0	17.9956	0	0	0	21.225	0	0	0	0	0	0	0	0	0	0	0	0	0	0	0	0
242.2/1.1 (14185)	242.151	1.14	14185	0	0	0	10.3689	0	48.9748	0	0	0	0	0	0	0	0	0	0	0	0	0	0	0	0	0	0	0	0	0	0	0	0	0	0	0	0	0	0	0	4.32665	0	0	0	0	0	0	0	0
242.2/3.8 (14187)	242.153	3.83	14187	0	0	0	0	14.2861	0	0	0	0	56.5922	6.61043	0	0	0	0	0	0	20.0982	0	0	0	0	0	0	0	0	0	0	0	0	0	0	0	0	0	0	0	0	0	0	0	0	0	0	0	0
242.2/8.1 (14192)	242.173	8.07	14192	20.589	0	13.3038	0	0	2.88123	2.0673	4.9046	0	0	5.40114	4.96618	0	1.36901	0	4.00015	0	0	3.25696	0	3.92371	2.53525	9.99646	0	7.58398	2.47787	3.77901	3.73071	1.84673	5.17131	5.2144	3.85692	0	0	2.7143	0	0	1.57827	1.70502	2.62247	2.08883	0	0	0	0	5.0127
242.2/2.8 (14194)	242.182	2.77	14194	0	0	0	0	0	7.90372	0	9.66664	0	0	0	0	0	0	0	0	0	0	0	5.36717	0	0	0	0	0	0	0	0	0	0	0	0	0	0	0	0	0	0	0	0	0	0	0	0	0	0
242.2/1.2 (14196)	242.184	1.15	14196	0	8.15451	27.9135	22.8758	32.1699	34.004	34.7836	28.33	47.1875	55.2523	40.6299	55.264	45.2099	13.0709	0	0	13.2234	0	3.04464	58.4464	26.2436	0	25.7881	62.1565	0	47.0045	0	14.9196	0	35.573	0	0	0	0	0	0	0	0	0	0	0	0	0	0	0	0
242.2/2.8 (14199)	242.185	2.83	14199	1.83667	0	7.58522	962.025	0	0	0	0	11.3843	0	0	0	7.49673	11.5497	0	114.687	28.5394	0	0	0	0	0	0	0	0	0	0	0	0	32.7423	0	0	0	0	0	0	0	0	0	0	0	0	0	0	0	0
242.2/3.4 (14198)	242.185	3.42	14198	0	0	16.0587	0	0	0	0	0	0	0	0	0	0	0	0	10.3139	0	0	0	17.0399	0	32.917	0	28.7688	25.6467	0	0	10.3577	86.8728	51.7065	0	0	0	0	0	0	0	0	0	0	0	0	0	0	0	0
242.2/3.1 (14200)	242.186	3.06	14200	1351.19	424.138	633.623	0	595.883	616.782	510.026	382.193	526.706	428.124	426.328	466.072	434.735	625.972	1076.29	559.287	0	0	800.06	482.153	575.697	0	53.7584	615.206	0	647.94	868.149	0	0	802.062	0	0	0	0	0	0	1.16405	4.16659	1.1428	0	0	0	4.98033	0	0	0
242.2/3.2 (14201)	242.186	3.17	14201	0	0	0	68.7496	0	0	0	0	0	0	0	0	0	0	0	0	640.055	0	0	0	0	0	589.742	0	345.837	0	0	837.575	1803.21	0	0	0	0	0	0	0	0	0	0	0	0	0	0	0	0	0
242.2/3.3 (14202)	242.186	3.3	14202	74.2702	5.92486	0	0	23.5463	0	23.3936	18.9123	19.1035	28.3362	0	16.4978	0	0	64.8747	0	0	0	31.5361	0	0	848.899	0	0	0	29.8342	32.8386	0	0	0	0	0	0	0	0	0	0	0	0	0	0	0	0	0	0	0
242.2/2.8 (14205)	242.191	2.8	14205	0	0	0	0	0	0	0	0	0	7.2731	0	0	0	0	0	0	0	12.3747	0	0	0	0	0	0	0	0	0	5.0578	0	0	0	0	0	0	0	0	0	0	0	0	0	0	0	0	0	0
242.2/12.4 (14207)	242.21	12.42	14207	88.6678	69.2936	57.1272	31.7015	0	36.0161	0	86.747	99.447	0	110.133	104.279	54.1617	0	60.8132	56.9857	65.7339	0	21.7968	42.4506	43.7518	40.3348	98.2761	62.542	40.8273	33.221	41.7701	37.1959	28.9871	0	45.5809	91.7597	88.2909	70.657	62.9859	59.7431	77.3197	68.5343	79.7315	94.1462	59.3832	79.4146	93.0582	97.9871	98.6169	59.2924
242.2/12.7 (14209)	242.213	12.69	14209	0	0	0	0	15.4304	0	45.0087	0	0	31.5756	0	0	0	25.9871	0	0	0	50.3778	0	0	0	0	0	0	0	0	0	0	0	17.5582	0	56.7219	0	56.2667	0	0	0	0	0	0	0	0	0	0	0	0
242.2/12.4 (14210)	242.214	12.41	14210	0	0	0	0	41.1945	0	71.5924	0	0	76.9262	0	0	0	51.2019	0	0	0	87.0076	0	0	0	0	0	0	0	0	0	0	0	40.936	0	0	0	0	0	0	0	0	0	0	0	0	0	0	0	0
242.3/13.0 (14212)	242.284	12.98	14212	44.2162	32.0612	8.67173	9.19169	17.0399	2.85223	37.4251	42.5106	32.2868	26.8281	49.9686	42.4189	14.6606	12.0299	14.8651	26.8243	9.55683	38.3431	0	5.57396	7.49212	3.41921	13.6698	3.37305	4.62557	1.6138	3.23241	9.47176	3.78397	6.86494	13.6053	54.4845	39.9443	45.3045	29.3704	20.2359	40.0187	37.6236	40.8422	35.9932	36.7812	38.9278	42.5366	39.6634	42.6371	38.7883
243.0/1.0 (14228)	243.032	1	14228	0	0	0	0	0	0	0	4.77243	6.45719	0	0	11.5951	0	0	0	0	0	0	0	0	0	0	0	0	2.95347	0	0	0	0	0	0	0	0	0	0	0	0	0	0	0	0	0	0	0	0	0
243.1/6.8 (14242)	243.087	6.85	14242	174.828	123.676	105.685	202.634	117.537	128.184	55.1984	26.5975	58.2741	111	91.2235	105.417	82.2905	90.8976	91.2068	231.568	137.949	0	163.419	119.563	113.076	228.295	112.699	122.399	144.317	120.059	181.776	246.647	306.138	201.759	0	0	0	0	0	0	0	6.07845	0	22.2985	9.16405	7.22533	28.3937	0	0	0
243.1/1.1 (14247)	243.108	1.06	14247	0	0	0	0	0	0	0	0	2.17803	0	12.7123	0	3.15204	15.2881	0	0	0	0	0	0	0	0	0	0	0	0	2.90487	0	0	0	0	0	0	0	0	0	0	0	0	0	0	0	0	0	0	0
243.1/1.1 (14248)	243.113	1.1	14248	0	0	0	0	0	0	0	0	0	0	0	0	0	0	0	58.5091	42.5258	0	0	0	0	0	0	2.58309	0.388068	0	0	0	0	0	0	0	0	0	0	0	0	0	0	0	0	0	0	0	0	0
243.1/2.6 (14259)	243.133	2.63	14259	662.942	0	0	93.5354	0	0	0	0	0	0	0	0	0	17.7086	236.579	0	0	0	0	0	0	5.74645	0	0	28.7911	0	0	0	0	0	0	0	0	0	4.88314	0	0	0	0	0	0	0	0	0	0	0
243.1/3.0 (14262)	243.133	2.96	14262	0	0	0	305.338	0	0	0	0	0	50.8496	0	0	0	0	0	0	0	0	0	0	0	0	0	0	0	0	0	0	0	352.17	0	0	0	0	0	0	0	0	0	0	0	0	0	0	0	0
243.1/2.3 (14263)	243.133	2.27	14263	0	0	0	0	0	0	0	0	0	0	0	0	0	0	5.03408	212.099	0	0	0	0	0	0	0	0	0	0	0	0	772.648	0	0	0	0	0	0	0	0	0	0	0	0	0	0	0	0	0
243.1/2.7 (14264)	243.133	2.74	14264	0	134.456	35.9909	0	11.7047	0	7.93093	5.82695	24.4934	3.07506	0	0	0	0	0	0	0	0	246.283	0	0	0	0	0	14.5996	0	263.649	0	0	0	0	0	0	0	0	0	0	0	0	0	0	0	3.16676	0	0	0
243.1/5.0 (14265)	243.133	4.98	14265	0	0	0	0	0	0	0	0	0	0	0	0	0	1305.45	0	0	0	0	2131.02	1596.43	150.21	127.944	0	0	0	2228.12	3117.88	0	0	0	0	0	0	0	0	0	0	0	0	0	0	0	0	0	0	0
243.1/1.6 (14267)	243.133	1.55	14267	0	27.8912	0	0	0	0	0	0	0	0	0	4.30251	0	0	0	0	0	0	0	0	10.0841	10.2984	5.89186	40.7642	0	0	0	12.4676	92.9564	0	0	0	0	0	0	0	0	0	0	0	0	0	0	0	0	0
243.1/3.2 (14266)	243.133	3.2	14266	806.896	826.133	714.076	0	830.037	0	0	144.288	144.418	0	172.336	333.958	348.3	372.654	390.854	1565.6	1421.33	0	502.832	578.569	680.569	91.047	720.223	580.135	363.087	614.565	209.081	1522.74	851.645	582.935	0	0	0	0	0	0	0	0	0.675784	0	0	0	0	0	1.22236	0
243.1/5.1 (14268)	243.133	5.12	14268	3294.32	1229.54	1188.6	1232.02	1148.61	989.479	1100.73	968.324	1442.7	1482.02	1065.71	1016.23	1337.24	0	3240.32	2409.94	1874.57	0	0	0	1607.2	1839.01	2120.21	2005.06	2748.22	0	0	1916.78	2177.61	1411.07	0	0	0	0	0	0	0	0	0	0	0	0	0	0	0	0
243.1/3.3 (14272)	243.134	3.34	14272	0	0	0	0	0	0	0	0	0	0	0	4.35434	0	0	0	0	0	0	0	0	0	336.96	0	0	0	0	0	0	0	0	0	0	0	0	0	0	0	0	0	0	0	0	0	0	0	0
243.1/4.9 (14271)	243.134	4.85	14271	976.076	634.893	512.705	0	820.229	129.733	1209.44	686.904	641.516	1616.16	799.743	695.723	1303.07	1057.01	1852.16	591.429	1291.86	0	599.469	1240.72	648.427	591.266	747.067	1668.01	615.231	1391.7	489.189	1332.73	727.659	283.774	0	0	0	0	0	0	0	0	0	0	0	0	0	0	0	0
243.1/4.5 (14273)	243.134	4.48	14273	253.132	242.213	355.674	0	0	0	437.917	88.0908	244.65	533.139	294.514	274.92	459.214	459.638	301.181	270.169	544.917	0	269.313	0	278.011	402.927	362.144	521.109	237.133	0	474.262	610.394	355.989	778.873	0	0	0	0	0	0	0	0	0	0	0	0	7.07311	1.77882	0.871705	0
243.1/2.1 (14277)	243.135	2.09	14277	0	0	0	44.8909	0	0	9.35807	0	0	0	0	0	0	55.8556	3.78988	0	0	0	0	0	0	0	0	0	0	0	0	0	0	0	0	0	0	0	0	0	0	0	0	0	0	0	0	0	0	0
243.1/1.9 (14278)	243.135	1.93	14278	0	0	10.6867	0	0	45.5789	6.59171	0	0	0	0	0	0	0	0	0	0	0	0	0	17.7498	0	34.6019	0	0	0	0	144.14	0	0	0	0	0	0	0	0	0	0	0	0	0	0	0	0	0	0
243.1/2.8 (14279)	243.136	2.8	14279	0	0	0	0	18.5848	100.723	39.4648	0	0	0	0	0	0	111.213	0	0	0	178.162	0	0	0	0	0	0	0	0	0	0	0	0	0	0	0	0	0	0	0	0	0	0	0	0	0	0	0	0
243.1/3.0 (14280)	243.137	3.03	14280	0	0	0	0	0	0	139.617	0	0	225.493	0	0	0	0	0	0	0	931.953	0	0	0	29.6301	0	0	0	0	0	0	0	0	0	0	0	0	0	0	0	0	0	0	0	0	0	0	0	0
243.1/2.7 (14281)	243.137	2.66	14281	0	5.86887	0	0	0	0	0	0	0	0	3.47384	2.39739	0	0	0	0	0	38.437	0	0	0	6.11913	0	0	0	0	0	0	0	0	0	0	0	0	0	0	0	0	0	0	0	0	0	0	0	0
243.1/3.6 (14289)	243.147	3.63	14289	57.2976	0	0	0	0	0	0	0	0	0	0	0	0	0	0	0	0	0	37.697	0	0	48.9644	0	0	0	1.73246	79.0972	0	34.7919	0	0	0	0	0	0	0	0	0	0	0	0	0	0	0	0	0
243.1/3.5 (14290)	243.148	3.52	14290	0	10.1211	36.2896	0	2.41816	0	21.4154	0	42.3889	25.2369	17.6179	0	0	5.19681	57.5878	40.8576	22.4398	0	0	0	29.7542	0	37.7243	27.624	46.2938	0	0	22.7681	0	0	0	0	0	0	0	0	0	0	0	0	0	0	0	0	0	0
243.2/3.5 (14294)	243.152	3.47	14294	0	4.02825	0	0	0	12.4302	0	0	0	0	0	17.007	0	2.22778	0	0	0	36.8303	0	0	0	0	0	0	0	0	0	0	0	6.28544	0	0	0	0	0	0	0	0	0	0	0	0	0	0	0	0
243.2/5.6 (14296)	243.169	5.63	14296	0	0	0	0	0	0	0	0	11.9472	0	4.49533	5.42326	6.50393	7.44308	13.8094	2.78591	2.74189	0	9.37817	3.04083	4.24767	3.87784	5.44195	8.14974	3.23962	3.97646	8.65607	0	0	0	0	0	0	0	0	0	0	0	0	0	0	0	0	0	0	0
243.2/3.7 (14297)	243.169	3.72	14297	14.0622	0	1.8414	15.0037	0	0	0	0	0	0	0	0	0	0	0	0	0	0	0	0	0	0	0	0	0	0	0	0	0	0	0	0	0	0	0	0	0	0	0	0	0	0	0	0	0	0
243.2/1.0 (14298)	243.17	1	14298	0	0	0	0	0	0	0	30.1815	22.7177	0	0	31.309	18.8278	0	36.327	0	0	0	17.8071	25.7335	40.317	27.2164	16.5636	23.7657	0	42.5858	22.2059	0	0	0	0	0	0	0	0	0	0	0	0	0	0	0	0	0	0	0
243.2/12.4 (14305)	243.211	12.44	14305	6.81673	0	1.86901	0	0	0	0	0	0	0	0	0	4.05366	0	6.02038	1.64963	0	0	0	0	0	0	0	0	0	0	1.82736	0	0	0.875141	1.05789	0	5.85413	0	1.97003	0	6.79634	0	3.43233	0	0	6.24163	0	7.84224	0	4.7137
243.2/14.6 (14308)	243.229	14.58	14308	23.8199	0	0	0	0	0	0	0	0	0	0	0	0	0	0	0	0	0	0	0	0	0	0	0	0	0	0	0	0	0	0	0	0	0	0	0	0	0.882888	0	0	0	0	0	0	0	0
244.1/12.1 (14331)	244.063	12.11	14331	5.10239	4.85536	4.49919	10.5531	4.22017	3.5574	0	0	0	0	0	0	0	0	0	5.60741	5.68906	7.62875	0	0	0	0	0	0	0	0	0	5.18397	4.40765	1.02201	0	0	0	0	0	0	0	0	0	0	0	0	0	0	0	0
244.1/8.3 (14334)	244.079	8.35	14334	37.6799	11.8118	11.1766	4.85632	11.3976	0.914185	0	0	0	0	0	0	0	0	0	0	0	0	0	0	0	0	0	0	0	0	0	13.6481	23.2333	0.941155	0	0	0	0	0	0	0	0	0	0	0	0	0	0	0	0
244.1/1.1 (14336)	244.092	1.06	14336	89.4098	74.0261	72.9554	101.891	67.2601	94.7337	103.215	148.561	127.573	95.9921	121.656	111.425	130.989	144.013	151.793	311.65	322.099	0	192.06	183.487	219.82	183.981	180.456	174.467	149.346	231.014	159.112	466.568	388.653	333.469	0	0	0	0	0	0	0	0	0	0	0	0	0	0	0	0
244.1/1.1 (14349)	244.122	1.11	14349	0	0	0	0	0	0	15.4222	0	0	23.3201	18.4378	0	0	23.0691	39.2146	0	35.8509	4.93506	41.2261	0	20.5701	0	0	0	0	0	35.8619	0	0	0	0	0	0	0	0	0	0	0	0	0	0	0	1.20213	0	0	0
244.1/1.1 (14351)	244.126	1.11	14351	28.7231	0	25.127	1.05092	31.8387	39.4263	0	0	0	0	0	40.2961	0	0	0	0	58.5869	0	0	26.6009	0	50.1267	33.4771	0	59.0913	38.5175	0	75.7749	97.0795	0	0	0	0	0	0	0	0	0	0	0	0	0	0	0.682685	0	0
244.1/1.0 (14358)	244.136	1.01	14358	0	202.662	179.423	0	0	0	0	0	0	0	0	0	0	0	0	0	191.296	0	0	0	0	0	0	0	0	0	0	0	209.223	0	0	0	0	0	0	0	0	0	0	0	0	0	0	0	0	0
244.1/1.9 (14364)	244.137	1.86	14364	0	0	0	22.7778	0	0	0	0	0	0	0	0	0	0	0	0	0	0	0	0	0	4.73302	0	0	0	0	0	9.41177	0	0	0	0	0	0	0	0	0	0	0	0	0	0	0	0	0	0
244.1/1.0 (14370)	244.139	1.01	14370	114.385	0	0	293.347	190.225	176.977	177.576	173.066	193.657	0	143.694	165.868	141.627	204.454	165.086	0	0	180.189	180.11	166.156	204.141	181.232	197.574	212.434	0	182.606	174.142	234.805	0	0	0	0	0	0	0	0	0	0	3.55577	0	0	0	0	0	0	0
244.2/2.6 (14374)	244.158	2.6	14374	0	0	0	0	0	0	0	0	12.993	0	0	0	19.9174	34.4752	45.4562	0	0	0	0	0	0	0	0	0	0	0	0	0	0	0	0	0	0	0	0	0	0	0	0	0	0	0	0	0	0	0
244.2/2.4 (14375)	244.164	2.41	14375	0	0	0	11.0785	0	0	0	0	0	0	0	0	114.967	0	5.59757	0	0	0	0	0	0	0	0	0	0	0	0	0	0	0	0	0	0	0	0	0	0	0	0	0	0	0	0	0	0	0
244.2/2.0 (14376)	244.164	2.04	14376	0	0	0	0	0	0	2.33387	0	99.4362	2.02328	2.08769	123.098	2.63566	0	373.102	0	0	0	0	0	0	0	0	0	0	0	0	0	0	0	0	0	0	0	0	0	0	0	0	0	0	0	0	0	0	0
244.2/3.0 (14377)	244.165	3.04	14377	9.69409	2.77455	7.84296	0	0	0	0	33.2325	131.089	0	79.9578	132.543	124.135	0	517.705	0	0	0	0	0	0	0	0	0	0	0	0	0	3.24934	2.30454	0	0	0	0	0	0	0	0	0	0	0	0	0	0	0	0
244.2/1.0 (14378)	244.165	1.02	14378	85.7941	114.219	122.417	161.516	113.92	120.386	131.842	45.6668	75.1319	31.1736	102.146	110.026	41.4968	183.315	119.514	216.172	244.503	0	34.0697	32.0289	49.8883	41.1607	43.3942	21.0845	0	26.6896	11.3198	270.658	227.617	235.972	0	0	0	0	0	0	0	0	0	0	0	0	0	0	0	0
244.2/2.8 (14380)	244.165	2.78	14380	37.5913	0	20.4149	0	27.3068	20.0213	0	0	0	0	0	0	0	0	11.4303	4.84091	0	0	0	0	0	0	3.56589	0	0	0	3.67441	0	0	0	0	0	0	0	0	0	0	0	0	0	0	0	0	0	0	0
244.2/2.2 (14382)	244.166	2.2	14382	0	0	0	0	0	0	109.606	39.2943	0	0	112.443	0	4.59334	123.914	0	0	0	0	0	0	0	0	0	0	0	0	0	0	0	0	0	0	0	0	0	0	0	0	0	0	0	0	0	0	0	0
244.2/3.0 (14384)	244.167	3.01	14384	0	0	0	0	0	0	106.977	0	0	151.879	0	0	0	288.715	0	0	0	0	0	0	0	0	0	0	0	0	0	0	0	0	0	0	0	0	0	0	0	0	0	0	0	0	0	0	0	0
244.2/10.1 (14389)	244.19	10.13	14389	124.876	100.775	83.4832	47.2332	73.7904	55.4913	94.2183	178.631	116.916	70.14	193.75	158.408	89.7679	47.4267	75.0264	81.9456	84.8871	0	21.3734	41.4921	69.0066	27.3341	90.0269	49.5357	64.3005	39.7874	26.2686	68.9868	49.8833	51.7186	83.1626	238.533	122.956	119.856	85.2391	87.7921	125.64	128.162	123.796	112.82	105.554	118.623	191.042	130.817	203.708	93.546
244.2/13.4 (14395)	244.227	13.35	14395	67.3915	86.0562	50.3045	28.9527	63.2289	34.0907	104.465	104.622	102.917	96.9152	114.268	106.382	89.2694	45.777	60.6041	82.5137	59.9417	86.411	20.4308	50.8738	65.4337	23.8802	68.558	49.1238	42.2271	33.8324	20.9642	52.5842	25.4648	40.5284	58.1755	112.629	110.374	102.059	79.8342	57.1765	82.6849	85.8919	90.8592	88.6742	85.3802	91.3644	100.015	120.974	102.702	103.604
244.2/12.2 (14396)	244.227	12.18	14396	0	0	0	0	0	0	0	0	0	0	0	0	0	0	0	0	0	0	57.8297	41.6024	41.3388	104.778	54.6459	47.1492	41.692	37.4292	48.932	0	0	0	0	0	0	0	0	0	0	0	0	0	0	0	0	0	0	0
244.3/12.5 (14399)	244.262	12.54	14399	16.2489	6.812	0	0	0	0	9.49382	11.034	10.3382	0	24.1421	10.4954	6.3195	0	11.1643	11.8246	3.49215	0	0	6.26764	3.32723	3.78859	9.0987	4.64179	6.25992	0	0	9.47618	14.09	6.37617	1.50365	8.52475	4.35099	8.76839	2.51749	3.74645	12.607	4.85517	6.10461	5.68253	4.07626	5.90936	6.93266	8.95109	6.48012	6.03269
245.1/1.4 (14424)	245.073	1.4	14424	1.32971	0	0	0	0	0.405533	0	0	0	0	0	0	0	0	0	0	5.09725	0	0	6.82952	0	0	0	0	0	3.89964	0	0	0	0	0	0	0	0	0	0	0	0	0	0	0	0	0	0	0	0
245.1/1.4 (14427)	245.077	1.39	14427	0	0	1.92607	0	0	0	5.32954	0	0	0	6.93351	0	0	0	2.35504	0	0	0	0	0	9.03315	0	17.3836	15.9593	9.05953	1.77115	0	0	2.01591	0	0	0	0	0	0	0	0	0	0	0	0	0	0	0	0	0
245.1/3.7 (14434)	245.089	3.7	14434	0	0	0	66.3805	0	0	12.9224	74.8454	0	0	0	23.1394	0	0	0	0	0	0	0	66.9082	0	0	0	0	0	0	0	0	0	0	0	0	0	0	0	0	0	0	0	0	0	0	0	0	0	0
245.1/3.4 (14436)	245.09	3.4	14436	59.2085	55.5538	77.689	0	73.1254	0	0	14.8288	0	0	37.2573	0	24.3175	0	7.56919	12.3822	5.89066	0	4.5044	0	2.48815	0	0	0	0	0	0	10.0922	0	45.6101	0	0	0	0	0	0	0	0	0	0	0	0	0	0	0	0
245.1/3.3 (14437)	245.091	3.28	14437	51.4795	0	0	133.786	0	94.1269	20.6081	0	0	28.4146	0	0	0	0	0	0	0	21.3533	0	0	0	0	0	0	0	21.7177	0	0	0	0	0	0	0	0	0	0	0	0	0	0	0	0	0	0	0	0
245.1/4.2 (14438)	245.091	4.2	14438	0	2.78016	2.62186	0	5.746	0	0	0	5.45481	0	5.66721	4.91178	0	0	0	16.7689	0	0	34.8641	0	12.2338	0	18.9218	0	2.86916	42.6238	69.907	0	0	5.10268	0	0	0	0	0	0	0	0	0	0	0	0	0	0	0	0
245.1/4.4 (14439)	245.092	4.4	14439	45.2323	16.8994	0	0	6.70909	0	29.898	43.4513	48.0479	0	43.5399	28.6292	49.7699	0	109.637	19.3132	4.21993	0	0	0	0	35.0605	24.7072	38.8647	50.5627	0	0	15.3673	36.053	9.19801	0	0	0	0	0	0	0	0	0	0	0	0	0	0	0	0
245.1/3.9 (14442)	245.092	3.87	14442	20.0945	0	0	0	0	0	17.4946	9.766	10.5997	25.3713	0	4.64155	17.7146	0	52.986	0	0	6.70681	17.8766	5.74762	0	161.635	0	0	0	18.1252	0	0	0	0	0	0	0	0	0	0	0	0	0	0	0	0	0	0	0	0
245.1/3.7 (14443)	245.092	3.72	14443	157.025	60.005	57.4557	0	53.6744	43.1816	65.6794	0	123.886	68.1107	70.2005	39.9573	79.927	0	227.649	153.962	72.2204	63.1029	164.843	0	85.6323	0	120.62	116.166	139.71	90.5711	214.179	90.2146	161.473	80.4387	0	0	0	0	0	0	0	0	0	0	0	0	0	0	0	0
245.1/4.0 (14444)	245.093	4.01	14444	0	0	8.49549	0	0	0	0	0	0	0	0	0	0	0	0	23.305	9.92615	0	15.2731	0	0	10.6748	12.4865	22.3336	21.304	0	0	0	40.887	0	0	0	0	0	0	0	0	0	0	0	0	0	0	0	0	0
245.1/2.9 (14447)	245.094	2.92	14447	23.5132	0	31.8171	0	0	0	0	0	1.52807	0	0	0	26.2814	1.12827	0	36.7975	38.9849	0	0	0	0	0	0	0	0	0	0	58.1328	71.8158	0	0	0	0	0	0	0	0	0	0	0	0	0	0	0	0	0
245.1/1.1 (14448)	245.095	1.12	14448	0	0	0	127.486	11.1823	0	0	5.21036	0	0	25.2846	25.9936	0	0	30.5947	0	0	0	5.45183	0	0	0	0	1.91121	10.2791	3.54647	14.0826	14.7736	0	0	0	0	0	0	0	0	0	0	0	0	0	0	0	1.37139	2.62564	0
245.1/3.4 (14458)	245.112	3.41	14458	0	0	0	0	0	0	0	0	0	0	0	0	0	0	20.3269	0	0	2.71942	0	0	1.30071	0	0	0	0	0	0	0	0	0	0	0	0	0	0	0	0	0	0	0.380159	0	0	0	0	0	0
245.1/2.8 (14459)	245.112	2.83	14459	0	0	0	4.07846	0	2.84848	0	0	0	0	0	0	0	0	0	1.03106	0	0	0	0	0	0	0	0	1.16036	1.22533	0	0	0	0	0	0	0	0	0	0	0	0	0	0	0	0	0	0	0	0
245.1/5.0 (14464)	245.115	4.96	14464	1.42759	0	2.75541	0	0	0	3.55808	0	0	0	0	0	0	0	24.8917	0	0	0	2.18936	0	0	0	0	0	0	0	0	0	0	4.21708	0	0	0	0	0	0	0	0	0	0	0	0	0	0	0	0
245.1/1.1 (14467)	245.119	1.1	14467	0	0	0	0	0	33.9972	62.3646	0	0	0	0	0	0	104.681	0	0	0	96.1956	0	0	0	0	0	0	0	0	0	0	0	0	0	0	0	0	0	0	0	0	0	0	0	0	0	0	0	0
245.1/5.8 (14471)	245.128	5.81	14471	0	0	0	0	0	0	0	0	0	0	0	0	0	0	0	0	0	0	1476.16	1166.87	0	0	0	0	0	1179.48	1760.81	0	0	0	0	0	0	0	0	0	0	0	0	0	0	0	0	0	0	0
245.1/6.3 (14472)	245.129	6.27	14472	2345.6	1509.54	1490.41	1534.75	1557.8	1497.85	1737.09	1570.69	1793.07	2013.81	1695.18	1814	1709.14	1659.84	2336.59	2058.12	1657.35	0	4.7866	0	1.80071	34.2237	42.0336	5.18577	41.9808	3.1205	0	1989.66	2439.76	1696.19	0	0	0	0	0	0	50.4846	52.9927	53.6819	42.2238	39.115	17.8275	80.5391	48.7399	56.4829	0
245.1/7.0 (14473)	245.131	6.97	14473	55.1724	29.3636	32.0277	30.3655	27.4892	0	0	0	17.0421	22.0512	13.3189	16.7038	7.25053	8.7389	22.456	49.9685	0	0	0	0	0	0	0	0	0	0	0	34.117	49.9237	30.9232	0	0	0	0	0	0	0	0	0	0	0	0	0	0	0	0
245.1/5.9 (14475)	245.131	5.95	14475	0	0	0	0	0	1187.83	0	0	0	0	0	0	0	0	0	0	0	1402.69	0	0	0	0	0	0	0	0	0	0	0	0	0	0	0	0	0	0	0	0	0	0	0	0	0	0	0	0
245.1/6.8 (14474)	245.131	6.78	14474	25.7471	23.0913	0	0	0	3.69965	0	0	0	0	0	0	0	0	0	0	0	3.68478	0	0	0	0	0	0	0	0	0	0	5.23383	0	0	0	0	0	0	0	0	0	0	0	0	0	0	0	0	0
245.1/1.2 (14492)	245.147	1.17	14492	0	0	0	0	0	0	0	0	0	0	0	0	0	0	0	0	0	0	0	2.13225	0	0	0	0	30.4665	0	0	0	0	0	0	0	0	0	0	0	0	6.83717	13.3847	0	0	2.55298	0	0	0	0
245.1/4.0 (14493)	245.149	4.03	14493	0	0	0	0	0	0	0	0	5.69969	3.40133	1.67104	0	0	0	23.3363	3.70705	0	0	0	0	1.73736	2.18478	2.31139	0	0	4.00833	9.48807	2.20572	0	0	0	0	0	0	0	0	0	0	0	0	0	0	0	0	0	0
245.1/3.5 (14495)	245.15	3.45	14495	6.53554	3.75139	9.20843	0	0	0	7.19918	2.16284	10.441	4.373	3.68248	6.61502	5.12808	8.77016	13.0301	0	0	0	0	5.89283	0	0	10.4174	8.85084	12.0483	0	2.87129	5.24697	8.83856	10.8641	0	0	0	0	0	0	0	0	0	0	0	0	0	0	0	0
245.1/3.8 (14498)	245.15	3.83	14498	0	0	0	0	0	0	0	0	0	0	0	0	0	0	9.79934	13.1905	0	0	0	0	0	0	1.86997	0	0	0	0	0	0	0	0	0	0	0	0	0	0	0	0	0	0	0	0	0	0	0
245.2/2.2 (14505)	245.162	2.21	14505	0	0	0	30.9692	0	0	0	7.29956	0	4.63988	0	0	1.44046	0	0	4.1684	0	0	0	0	0	0	0	0	0	0	14.387	0	4.35221	0	0	0	0	0	0	0	0	0	0	0	0	0	0	0	0	0
245.2/4.8 (14510)	245.184	4.8	14510	0	0	0	0	0	0	0	0	0	0	0	0	230.942	0	0	0	0	0	0	0	0	0	0	0	0	7.95833	0	0	0	0	0	0	0	0	0	0	0	5.64001	0	10.5229	8.67433	0	0	7.14669	0	0
245.2/4.0 (14511)	245.184	3.99	14511	0	0	0	0	0	0	0	0	17.3227	0	0	0	0	0	0	0	0	0	0	0	143.8	0	65.6549	0	0	0	0	0	0	0	0	0	0	0	0	0	0	0	0	0	0	0	0	0	0	0
245.2/4.4 (14512)	245.184	4.42	14512	0	0	0	0	0	0	0	0	0	28.4099	0	0	200.967	0	0	0	0	0	0	0	0	0	0	0	0	0	21.8296	0	0	0	0	0	0	0	0	0	0	0.737217	0	0	6.51996	0	0	0	0	0
245.2/4.2 (14513)	245.185	4.18	14513	3080.01	1122.73	1337.7	3486.06	2372.24	2222.47	54.7774	35.0349	35.079	0	31.5775	51.1037	59.4542	107.61	206.948	865.813	454.59	0	247.69	188.483	250.578	112.497	102.315	40.9927	9.99426	91.0403	0	1559.62	2763.29	2213.98	0	0	0	0	0	0	1.0721	1.96407	0	0	0	2.49239	3.00561	0.822323	0.633318	0
245.2/4.6 (14514)	245.185	4.62	14514	8345.36	4985.34	3720.73	5959.71	4035.7	3876.69	177.807	278.653	418.292	205.788	209.477	436.262	286.209	464.322	1078.74	823.439	408.506	0	862.13	213.212	595.033	244.079	142.345	38.1189	9.38323	94.604	124.233	2775.58	4569.34	2431.65	0	0	0	0	0	0	4.80859	3.11004	2.16685	14.4525	0	15.8715	33.3885	11.4022	5.88643	0
245.2/4.9 (14516)	245.186	4.92	14516	2970.36	1860.83	1437.41	2028.14	1153.96	1161.93	427.303	181.187	433.996	502.369	462.129	859.94	332.874	1202.04	1710.93	229.96	152.807	0	139.245	26.8357	121.095	89.3053	82.5016	20.7152	3.30854	0	14.6276	291.393	396.863	202.104	0	0	0	0	0	0	14.3477	10.6007	21.5947	20.9946	22.5779	46.4454	32.0351	10.0914	13.2046	0
245.2/3.9 (14517)	245.186	3.88	14517	0	520.768	607.176	0	0	0	4.44759	14.9542	0	0	6.10222	28.695	28.5949	36.8074	0	0	220.944	0	238.082	109.851	0	98.1571	0	11.2336	0	33.5753	77.2385	895.392	0	0	0	0	0	0	0	0	0	0	0	0	0	0	0	0	0	0
245.2/4.5 (14519)	245.187	4.45	14519	0	0	0	0	0	0	176.271	0	0	10.9834	0	0	0	258.993	0	0	0	204.177	0	0	0	0	0	0	0	0	0	0	0	0	0	0	0	0	0	0	0	0	0	0	0	0	0	0	0	0
245.2/4.2 (14521)	245.188	4.19	14521	0	0	0	0	0	0	0	0	0	59.951	0	0	0	0	0	0	0	480.675	0	0	0	0	0	0	0	0	0	0	0	0	0	0	0	0	0	0	1.3617	0	0	0	0	0	0	0	0	0
245.2/14.2 (14526)	245.226	14.22	14526	0	0	0	0	0	0	5.47838	0	0	0	10.3699	16.8133	20.1926	0	49.2552	0	0	0	0	0	0	0	3.81572	0	5.37978	0	12.8233	1.36534	0	0	0	0	0	0	0	0	0	0	0	0	0	0	0	0	0	0
245.2/14.2 (14527)	245.229	14.21	14527	0	0	0	0	0	0	0	0	0	9.85629	0	0	0	22.0125	0	0	0	0	0	0.870138	0	0	0	0	0	0	0	0	0	0	0	0	0	0	0	0	0	0	0	0	0	0	0	0	0	0
246.1/1.7 (14546)	246.075	1.67	14546	0	0	196.886	512.328	160.051	210.133	53.5853	61.7812	75.1172	30.3601	57.4462	57.4298	87.5101	21.5226	0	64.3747	53.8722	19.0442	117.815	0	71.7543	49.2504	46.2745	50.3347	76.6431	0	0	175.04	222.7	223.482	0	0	0	0	0	0	0	0	0	0	0	0	0	0	0	0
246.1/1.5 (14549)	246.075	1.49	14549	339.832	158.19	0	0	0	0	9.73202	1.5679	0	0	2.31775	0	2.62579	32.359	96.1646	3.3953	0	0	0	55.869	0	6.46188	0	2.19373	5.83089	100.832	150.642	0	0	0	0	0	0	0	0	0	0	0	0	0	0	0	0	0	0	0
246.1/1.4 (14550)	246.079	1.41	14550	0	0	2.85169	0	0	3.59839	0	0	0	0	0	0	0	0	0	0	0	0	0	0	0	0	1.75205	0	0	1.43835	0	0	9.7516	0	0	0	0	0	0	0	0	0	0	0	0	0	0	0	0	0
246.1/5.0 (14563)	246.097	4.96	14563	0	0	0	0	0	0	570.975	520.299	465.315	523.346	478.727	344.27	399.806	369.732	1165.58	0	0	0	0	0	16.5201	0	12.7351	11.9397	0	3.62095	0	0	0	0	0	0	0	0	0	0	0	0	0	0	0	0	0	0	0	0
246.1/4.4 (14565)	246.098	4.37	14565	0	0	0	0	0	0	545.867	373.652	0	383.39	0	0	0	0	0	0	0	4.40779	0	0	0	0	0	0	0	0	0	0	0	0	0	0	0	0	0	0	0	0	0	0	0	0	0	0	0	0
246.1/1.1 (14568)	246.106	1.09	14568	0	0	0	0	0	0	0	0	2.38742	0	0	0	0	0	0	0	0	0	0	0	0	0	0	0	0	0	0	0	0	0	0	0	0	0	0	0	0	0	0	16.5274	0	11.9952	29.4516	14.819	0	0
246.1/1.1 (14569)	246.108	1.1	14569	0	0	0	0	0	0	0	0	0	0	0	0	0	0	0	0	0	0	0	3.15151	0	0	0	0	0	0	0	0	0	0	0	0	0	0	0	0	0	0	0	0	14.7786	0	0	0	22.6767	0
246.1/5.9 (14575)	246.131	5.94	14575	367.297	202.688	175.26	208.904	207.63	178.548	237.663	229.205	260.442	276.767	248.091	235.988	239.395	243.494	412.376	293.944	210.852	0	0	191.184	174.782	262.781	202.561	202.18	196.429	0	0	240.77	341.288	202.327	0	0	0	0	0	0	3.66239	0	4.86834	2.13507	1.89364	0	5.03932	2.02012	1.12401	0
246.1/2.9 (14580)	246.143	2.95	14580	94.2383	0	146.52	0	0	0	0	0	24.7759	0	0	0	75.8548	0	94.7683	0	0	0	112.643	0	21.1194	0	42.8877	9.91148	21.8318	0	28.4732	191.135	219.831	0	0	0	0	0	0	0	0	0	0	0	0	0	0	0	0	0
246.1/1.9 (14582)	246.144	1.93	14582	275.695	2.93524	0	0	0	3.43033	0	0	0	0	0	0	0	0	11.0998	0	0	0	0	0	0	0	0	0	0	0	0	0	0	0	0	0	0	0	0	0	0	0	0	0	0	0	0	0	0	0
246.1/1.1 (14584)	246.145	1.14	14584	1257.96	1513.82	566.965	1322.71	1559.81	1732.76	124.402	111.415	116.833	107.58	101.495	151.086	145.662	188.99	165.405	783.195	0	181.62	234.846	0	227.91	147.318	125.382	64.6507	39.3709	82.6851	73.368	1896.09	1564.88	1867.08	0	0	0	0	0	0	0	0	2.26357	3.77855	5.85933	0	0	0	0	0
246.1/2.9 (14585)	246.145	2.94	14585	0	0	0	0	152.696	0	0	0	0	45.1634	0	0	0	0	0	0	0	0	0	3.24482	0	0	0	6.34918	0	0	0	0	0	0	0	0	0	0	0	0	0	0	0	0	0	0	0	0	0	0
246.1/2.2 (14587)	246.147	2.22	14587	0	0	0	48.2139	0	0	0	0	1.49176	0	0	0	0	0	8.10805	0.302198	0	0	0	0	0	0	0	0	0	0	0	0	0	0	0	0	0	0	0	0	0	0	0	0	0	0	0	0	0	0
246.1/2.6 (14588)	246.147	2.59	14588	0	11.7687	0	62.9521	0	0	0	0	0	0	0	4.48517	0	1.04719	0	0	0	90.6991	0	0	0	0	0	0	0	0	0	0	0	0	0	0	0	0	0	0	0	0	0	0	0	0	0	0	0	0
246.2/4.2 (14592)	246.169	4.17	14592	119.522	0	0	97.6907	0	50.3893	5.59065	10.4122	24.9622	1.62777	5.87479	0	0	0	100.545	0	0	0	0	0	0	83.8144	33.1331	15.7669	0	0	30.79	0	0	0	0	0	0	0	0	0	6.33349	0	4.86207	0	0	0	0	0	0	0
246.2/4.5 (14593)	246.17	4.53	14593	0	0	0	0	0	0	0	0	0	0	0	0	0	0	0	140.566	84.2859	0	21.4609	0	0	27.6721	47.2433	0	12.2164	0	0	0	202.727	0	0	0	0	0	0	0	0	0	0	0	0	0	0	0	0	0
246.2/2.8 (14600)	246.181	2.84	14600	0	0	0	0	0	18.0985	0	0	0	1.02814	0	1.10198	0	7.0449	0	0	0	0	0	0	0	0	0	0	0	0	0	0	0	0	0	0	0	0	0	0	0	0	0	0	0	0	0	0	0	0
246.2/1.0 (14603)	246.184	1.01	14603	0	0	0	0	0	0	48.3283	0	0	18.1674	0	0	0	79.5172	0	0	0	801.732	0	0	0	0	0	0	0	0	0	0	0	0	0	0	0	0	0	0	0	0	0	0	0	0	0	0	0	0
247.1/12.8 (14622)	247.094	12.79	14622	7.99996	19.9734	0	6.95797	11.8272	0	0	23.1242	14.5882	0	22.5651	18.6014	11.05	0	0	15.1834	12.7509	0	0	3.1101	8.27181	0	13.0197	0	0	0	0	12.0625	3.88126	5.98941	8.08677	28.6373	30.6846	31.8536	15.2845	13.6764	21.8165	13.8022	30.8059	22.6962	27.7989	25.7579	29.7384	21.8128	38.6469	26.8996
247.1/4.6 (14629)	247.101	4.59	14629	0	0	0	0	0	0	78.2875	0	0	75.1976	0	0	0	0	0	0	0	0	0	0	2.73248	0	0	0	0	0	0	0	0	0	0	0	0	0	0	0	0	0	0	0	0	0	0	0	0	0
247.1/3.5 (14630)	247.103	3.46	14630	0	0	13.4693	0	0	0	0	0	7.96315	0	0	0	17.3156	0	0	0	0	0	0	0	0	0	0	0	8.31534	0	2.40379	0	0	7.83324	0	0	0	0	0	0	0	0	0	0	0	0	0	0	0	0
247.1/3.4 (14634)	247.107	3.42	14634	0	0	0	0	3.50874	0	0	19.0006	0	0	16.5001	0	0	0	0	0	0	0	0	0	0	0	0	0	0	0	0	0	0	0	0	0	0	0	0	0	0	0	0	0	0	0	0	0	0	0
247.1/6.2 (14636)	247.108	6.2	14636	12.7195	11.2025	0	0	1.22322	0	84.9463	75.1695	95.8198	70.218	71.6058	85.0356	80.5529	101.447	117.263	15.5665	1.14866	6.21395	21.4028	0	10.4885	27.4379	19.6953	23.2602	17.3994	10.408	36.8979	12.7938	7.54392	0	0	0	0	0	0	0	0	0	0	0	0	0	0	0	0	0
247.1/3.4 (14640)	247.109	3.41	14640	0	5.81315	0	0	0	0	0	0	13.0289	30.2894	15.0987	22.3188	0	0	26.0005	24.6951	13.7363	0	0	0	124.19	0	0	0	0	0	0	8.55186	0	0	0	0	0	0	0	0	0	0	0	0	0	0	0	0	0	0
247.1/3.3 (14642)	247.11	3.26	14642	0	0	0	0	0	0	20.6242	0	0	0	0	0	0	10.7416	0	0	0	0	162.59	0	0	330.108	0	0	0	31.8909	243.358	0	0	0	0	0	0	0	0	0	0	0	0	0	0	0	0	0	0	0
247.1/3.5 (14643)	247.11	3.52	14643	10.0156	0	0	4.18569	0	0	0	0	0	0	0	0	0	0	12.4465	0	0	0	0	0	0	94.4138	0	0	0	0	0	5.57642	0	0	0	0	0	0	0	0	0	0	0	0	0	0	0	0	0	0
247.1/3.0 (14644)	247.111	3.02	14644	79.8543	0	0	0	0	0	0	0	0	25.5461	0	2.65775	0	18.2227	0	24.4917	73.9786	0	135.219	0	0	0	0	0	0	0	199.944	0	0	0	0	0	0	0	0	0	0	0	0	0	0	0	0	0	0	0
247.1/3.4 (14647)	247.113	3.39	14647	0	0	0	0	0	0	0	0	0	0	0	0	0	0	0	0	0	16.6233	0	184.117	0	0	0	0	241.846	0	0	0	7.99162	0	0	0	0	0	0	0	0	0	0	0	0	0	0	0	0	0
247.1/2.7 (14655)	247.127	2.66	14655	875.033	0	184.044	15.4825	127.113	0	0	0	0	0	0	0	97.2499	212.147	304.381	35.3069	0	0	0	476.534	734.63	0	9.7767	698.504	764.647	463.48	668.805	0	776.509	0	0	0	0	0	0	0	0	0	0	0	0	0	0	0	0	0
247.1/3.2 (14656)	247.127	3.22	14656	447.549	0	354.303	0	453.348	0	102.284	103.755	114.66	0	123.606	92.7797	91.4753	0	319.286	1214.68	941.976	0	400.195	316.863	477.227	0	506.483	451.455	399.077	0	72.3718	955.146	0	488.826	0	0	0	0	0	0	2.45274	0	2.77719	2.61435	1.96236	2.39646	6.82805	1.96927	1.9179	0
247.1/1.6 (14657)	247.128	1.64	14657	0	0	0	0	0	0	0	1.43297	0	0	0	0	0	0	0	0	0	0	0	0	0	0	112.98	0	0	0	0	0	0	465.443	0	0	0	0	0	0	0	0	0	0	0	0	0	0	0	0
247.1/2.1 (14659)	247.128	2.14	14659	0	0	0	0	0	0	32.0644	0	0	0	9.12821	0	0	0	0	0	0	0	0	0	0	0	11.169	0	0	0	0	445.017	0	0	0	0	0	0	0	0	0	0	0	0	0	0	0	0	0	0
247.1/3.4 (14660)	247.128	3.38	14660	42.4953	0	30.3765	0	0	0	0	0	0	69.1312	0	0	0	0	122.615	82.0731	0	0	0	0	51.4205	220.919	0	0	0	0	16.9204	27.4546	0	23.2567	0	0	0	0	0	0	0	0	0	0	0	0	0	0	0	0
247.1/2.0 (14662)	247.128	2.01	14662	109.626	218.646	0	124.075	0	0	48.8378	31.6494	26.1976	9.80834	14.1823	89.4243	0	6.91663	0	0	318.843	0	62.5136	0	75.1419	118.683	0	0	0	0	53.2025	0	616.888	0	0	0	0	0	0	0	0	0	0	0	0	0	0	0	0	0
247.1/2.4 (14661)	247.128	2.39	14661	7.96235	92.0317	0	0	4.21971	0	195.911	102.954	246.156	0	153.998	55.9049	4.27781	0	38.0692	760.117	0	14.0391	0	0	0	0	0	0	0	0	0	0	0	0	0	0	0	0	0	0	0	0	0	0	0	0	0	0	0	0
247.1/1.1 (14663)	247.128	1.14	14663	1451.37	1496.85	1894.67	1820.85	1991.44	2067.88	352.256	266.452	283.788	336.21	316.215	482.914	456.803	597.778	553.433	1994.71	2160.54	1696.35	1081.79	972.579	1112.22	1088.53	1153.51	794.284	765.726	842.307	636.183	2605.72	3078.14	3488.77	0	0	0	0	0	0	2.33579	4.15717	4.28963	0.866302	0	6.99274	2.66758	0	0	0
247.1/1.5 (14664)	247.129	1.47	14664	326.362	154.857	278.888	0	185.249	209.281	19.1308	15.2995	16.3112	18.1324	17.8775	22.4651	83.0304	86.0724	14.6328	296.96	305.522	54.4297	133.015	59.9751	116.393	0	0	73.0315	53.0089	137.936	152.838	584.099	180.601	0	0	0	0	0	0	0	0	0	0	0	0	0	0	0	0	0
247.1/3.0 (14665)	247.129	3.01	14665	216.757	606.243	195.756	0	194.641	362.798	230.291	238.828	238.036	0	244.907	398.394	518.797	504.813	74.8528	289.029	328.187	0	0	276.809	155.124	1050.01	47.2646	130.259	0	495.563	75.3404	605.948	559.099	508.636	0	0	0	0	0	0	2.33646	0	3.96122	0	0	3.33802	1.87024	0.915234	0	0
247.1/2.8 (14667)	247.129	2.8	14667	0	171.064	0	269.139	0	0	66.3605	57.5369	0	0	67.2318	79.3393	0	0	0	0	0	315.059	1290.35	0	0	0	1130.59	0	0	105.243	0	0	0	0	0	0	0	0	0	0	0	0	0	0	0	0	0	0	0	0
247.1/2.6 (14671)	247.131	2.58	14671	0	0	0	46.6234	0	22.9149	0	0	0	130.742	0	0	0	0	0	0	0	0	0	0	0	0	0	0	0	0	0	0	0	0	0	0	0	0	0	0	0	0	0	0	0	0	0	0	0	0
247.1/3.6 (14681)	247.139	3.6	14681	0	0	4.6926	7.56235	0	0	0	0	0	0	0	0	0	0	58.9839	0	0	0	0	0	0	0	0	0	0	0	0	0	0	0	0	0	0	0	0	0	0	0	0	0	0	0	0	0	0	0
247.1/7.3 (14684)	247.144	7.28	14684	378.31	225.761	208.502	226.632	217.881	0	160.239	202.358	200.741	275.083	206.357	230.316	180.768	171.831	287.509	347.233	275.506	0	51.332	37.1205	34.1238	72.7253	60.7692	44.698	43.0169	39.1579	70.882	281.275	373.123	241.644	0	0	0	0	0	0	0	0	0	0	0	0	0	0	0	0
247.1/4.2 (14685)	247.144	4.2	14685	0	0	0.924498	0	0	0	32.0949	13.6031	16.9974	31.8716	30.1392	17.4849	29.837	0	127.581	0	0	0	0	0	0	0	0	0	0	0	0	0	0	0	0	0	0	0	0	0	0	0	0	0	0	0	0	0	0	0
247.1/4.1 (14687)	247.145	4.09	14687	0	0	0	0	0	0	0	0	7.78974	0	5.82711	0	0	48.6699	0	0	0	0	0	0	0	0	0	0	0	0	0	0	0	0	0	0	0	0	0	0	0	0	0	0	0	0	0	0	0	0
247.2/1.1 (14694)	247.18	1.14	14694	133.535	0	155.686	0	185.909	0	0	0	0	0	0	0	0	0	0	165.581	175.586	0	8.85029	0	5.89702	7.39538	0	0	0	0	0	262.231	245.987	250.826	0	0	0	0	0	0	0	0	0	0	0	0	0	0	0	0
247.2/14.2 (14702)	247.226	14.23	14702	20.5163	12.6306	6.24967	5.13618	7.62007	6.98434	3.01848	2.84766	7.62987	0	6.57089	0	3.22239	0.443279	0	11.3972	6.61056	8.25223	0	0	0	0	1.08322	0	0	0	0	11.0533	9.20963	5.3058	0	3.39236	0.467382	0	2.44169	2.03919	0	4.27672	5.02304	1.04794	3.11427	0	2.91093	0	1.75024	4.0965
247.2/15.0 (14704)	247.24	14.96	14704	0	0	4.41285	0	0	2.6601	0	0	0	0	0	0	0	0	0	0	7.25272	0	0	0	22.2319	0	19.0792	0	53.1445	0	0	0	0	0	0	0	0	0	0	0	0	0	0	0	0	0	0	0	0	0
247.2/14.7 (14706)	247.242	14.72	14706	0	25.094	1.65442	0	0	2.51134	0	0	173.084	11.0402	22.4152	0	86.8639	2.43123	194.862	4.55612	3.24349	27.1605	94.7423	8.83806	0	30.1023	0	142.695	4.4562	4.72373	115.871	2.63711	0	74.9196	57.1783	5.43115	0	61.6749	79.4343	56.7046	107.805	1.8997	212.749	32.7332	30.0204	65.3229	2.7137	172.967	0.810227	207.674
248.1/4.9 (14717)	248.111	4.92	14717	0	0	0	0	0	0	0	58.1607	0	15.0866	0	0	13.6065	0	0	0	0	0	0	0	0	0	0	0	0	0	0	0	0	0	0	0	0	0	0	0	0	0	0.355789	0	0	0	0.939836	0	0	0
248.1/4.4 (14721)	248.111	4.4	14721	0	0	0	0	0	0	8.37818	0	0	0	0	0	0	0	18.3879	0	0	0	0	0	0	0	0	0	0	15.0443	1.29953	0	0	0	0	0	0	0	0	0	0	0	0	0	0	0	0	0	0	0
248.1/5.2 (14722)	248.112	5.2	14722	0	0	0	0	0	0	23.4932	0	61.289	69.2851	32.0532	55.0078	83.7706	69.9252	104.926	0	0	0	0	0	32.5406	0	6.22228	29.074	0	0	0	0	0	0	0	0	0	0	0	0	0	0	0	0	0	0	0	0	0	0
249.1/1.2 (14776)	249.083	1.18	14776	7.3773	104.695	159.37	47.1878	168.036	164.576	136.828	101.073	116.181	0	78.9838	94.9171	34.5392	86.0179	1.17062	83.3546	245.271	0	0	63.2826	183.519	4.74575	229.167	202.488	5.74835	83.197	8.83088	202.197	22.9135	192.349	0	0	0	0	0	0	54.4796	41.8068	17.7691	46.7732	35.078	21.2562	82.7201	38.7927	23.5148	0
249.1/2.8 (14777)	249.083	2.81	14777	0	59.223	4.47838	0	0	64.9913	144.354	146.742	0	0	0	0	0	52.6851	0	0	0	0	0	0	0	0	0	8.08917	11.6452	0	0	0	0	0	0	0	0	0	0	0	2.67687	1.44841	8.81475	3.47687	4.57727	8.02512	2.59878	6.49977	0	0
249.1/2.9 (14779)	249.084	2.92	14779	90.1823	0	75.1251	0	71.8027	0	0	0	141.567	99.0226	157.596	126.051	176.737	0	198.344	116.909	142.973	80.7078	126.314	106.275	122.743	0	144.704	153.16	173.465	133.886	149.258	92.0109	113.803	94.0369	0	0	0	0	0	0	0	9.09938	0	0	0	0	27.1735	0	8.32075	0
249.1/1.9 (14780)	249.084	1.89	14780	128.106	0	0	0	0	0	0	0	0	0	0	0	0	0	154.855	0	0	0	54.4681	0	0	142.44	0	0	0	0	161.75	0	163.815	0	0	0	0	0	0	0	0	0	0	0	0	0	0	0	0	0
249.1/1.2 (14781)	249.087	1.17	14781	0	0	0	0	0	0	3.76094	0	0	17.5112	0	0	0	0	0	0	0	173.784	0	0	0	0	0	0	0	0	0	0	0	0	0	0	0	0	0	0	0	0	0	0	0	0	0	0	0	0
249.1/1.0 (14789)	249.105	1.05	14789	31.7517	70.4013	48.2269	0	0	71.384	0	0	0	0	76.1363	90.026	65.6085	76.8881	0	0	70.837	98.6673	120.453	141.151	222.487	169.045	151.846	130.208	109.978	142.582	124.741	103.76	0	0	0	0	0	0	0	0	0	0	0	0	0	0	0	0	0	0
249.1/13.2 (14791)	249.109	13.18	14791	29.1885	0	0	0	0	0	0	0	4.85828	0	5.27184	0	0	0	0	0	0	0	0	0	0	0	0	0	0	0	0	0	0	0	0	0	10.8698	4.90353	2.72816	0	0	3.84805	0	5.12659	0	0	0	0	0	7.22413
249.1/3.5 (14797)	249.12	3.46	14797	27.9176	0	13.5453	0	0	0	0	0	0	0	0	0	0	0	0	2.80533	1.89174	0	0	0	1.60989	0	0	0	0	0	0	0	0	2.83425	0	0	0	0	0	0	0	0	0	0	0	0	0	0	0	0
249.1/2.3 (14799)	249.122	2.3	14799	0	0	1.197	23.112	0	4.42855	0	0	0	0	0	0	0	0	0	0	0	0	0	0	0	0	0	0	0	0	0	0	0	0	0	0	0	0	0	0	0	0	0	0	0	0	0	0	0	0
249.1/4.3 (14800)	249.122	4.29	14800	159.554	88.5401	96.8983	0	86.9078	79.3617	111.822	107.641	142.262	76.6312	104.272	117.029	0	0	202.515	134.927	91.9286	62.6529	0	72.2578	121.735	144.381	123.474	132.219	144.629	0	0	135.946	165.232	44.7995	0	0	0	0	0	0	0	0	0	0	0	0	0	0	0	0
249.1/4.1 (14801)	249.122	4.14	14801	31.1156	0	0	55.937	0	0	0	0	0	7.07412	0	0	101.37	94.0945	0	0	0	0	161.606	0	0	43.2877	0	0	0	104.263	196.395	0	0	15.4601	0	0	0	0	0	0	0	0	0	0	0	0	0	0	0	0
249.1/3.8 (14802)	249.123	3.82	14802	0	0	0	22.5066	0	0	0	0	8.17793	0	0	0	0	0	0	0	0	0	37.8436	11.9637	3.74631	0	0	13.6862	0	19.22	48.4951	0	0	0	0	0	0	0	0	0	0	0	0	0	0	0	0	0	0	0
249.1/3.4 (14803)	249.123	3.43	14803	0	20.8655	0	0	5.07031	16.6163	0	0	0	0	0	0	0	0	0	0	0	0	0	1.4851	0	0	0	0	0	0	0	0	0	0	0	0	0	0	0	0	0	0	0	0	0	0	0	0	0	0
249.1/3.9 (14805)	249.125	3.89	14805	0	0	0	0	0	4.01882	4.2831	0	0	2.07292	0	0	0	0	0	0	0	40.4315	0	0	0	0	0	0	0	0	0	0	0	5.3729	0	0	0	0	0	0	0	0	0	0	0	0	0	0	0	0
249.1/3.0 (14807)	249.126	2.97	14807	295.593	212.202	230.519	0	250.528	0	0	0	0	0	3.87714	0	4.96476	0	25.6502	50.5981	0	0	16.9079	0	5.2979	0	0	0	0	0	0	247.004	349.314	240.738	0	0	0	0	0	0	0	0	0	0	0	0	0.332007	0	0	0
249.2/13.9 (14818)	249.184	13.92	14818	725.669	436.408	523.553	336.676	420.791	353.739	436.856	440.557	536.725	0	535.753	429.837	425.757	369.054	395.34	470.605	406.583	0	272.772	358.702	393.152	212.537	516.213	451.536	444.205	309.586	102.237	461.939	390.352	407.951	310.375	539.511	555.692	466.823	422.348	330.445	494.513	413.602	472.973	459.186	405.79	460.446	490.315	527.55	521.206	486.219
249.2/13.9 (14821)	249.188	13.89	14821	0	0	0	0	0	0	0	0	0	422.055	0	0	0	0	0	0	0	450.944	0	0	0	0	0	0	0	0	0	0	0	0	0	0	0	0	0	0	0	0	0	0	0	0	0	0	0	0
249.2/15.8 (14822)	249.189	15.76	14822	0	5.40832	0	0	6.12753	0	4.21398	0	0	24.3528	0	0	0	9.54513	0	0	0	13.4997	0	0	0	1.31727	0	0	0	0	0	0	0	6.45015	0	11.6915	0	21.4958	0	0	0	0	0	0	13.2809	0	0	0	0	0
250.0/1.4 (14829)	249.985	1.42	14829	0	0	0	0	0	0	18.6332	22.6366	39.8548	0	28.3013	0	114.922	0	0.940605	0	0	2.443	0	0	9.03564	0	7.45427	0	6.6403	0	0	0	0	0	0	0	0	0	0	0	0	0	0	0	0	0	0	0	0	0
250.0/1.4 (14832)	249.995	1.39	14832	2.58815	3.25375	5.34148	11.5941	0	0	0	0	0	0	0	0	0	39.4525	0	0	0	0	0	0	0	3.07475	0	0	0	0	0	0	44.3139	47.8696	0	0	0	0	0	0	0	0	0	0	0	0	0	0	0	0
250.0/7.3 (14835)	250.016	7.28	14835	46.1408	31.0634	0	0	1.48888	0	0	53.3078	0	0	50.5497	51.4844	0	59.956	88.1311	74.3907	0	0	69.5897	31.7433	0	72.9112	0	0	48.8638	52.5054	92.883	55.1378	57.2503	0	0	0	0	0	0	0	0	0	0	0	0	0	0	0	0	0
250.0/7.4 (14836)	250.019	7.37	14836	0	0	0	0	0	1.71544	45.8332	0	0	54.9455	0	0	0	0	0	0	0	61.8483	0	0	0	0	0	0	0	0	0	0	0	4.23003	0	0	0	0	0	0	0	0	0	0	0	0	0	0	0	0
250.0/5.6 (14837)	250.035	5.57	14837	0	0	2.67565	0	0	0	0	2.66642	0	0	0	0	0	0	0	0	0	0	0	0	0	0	0	0	0	0	0	0	0	6.74689	0	0	0	0	0	0	0	0	0	0	0	0	0	0	0	0
250.0/3.5 (14839)	250.036	3.45	14839	19.2605	0	13.2598	17.2702	64.5595	86.4492	0	0	0	0	15.791	0	6.99026	0	18.196	67.7798	0	0	37.5972	53.9969	40.7628	0	40.1942	54.4348	39.4353	83.3979	18.3809	64.6885	38.0271	36.8244	0	0	0	0	0	0	0	0	0	0	0	0	0	0	0	0
250.0/1.5 (14841)	250.037	1.47	14841	769.868	1138.15	484.757	0	0	181.977	685.429	642.241	738.892	0	716.214	789.759	1298.85	495.176	443.798	1115.09	805.425	0	304.41	729.857	1162.89	189.828	0	1013.21	1238.19	580.266	466.193	480.41	58.8612	0	0	0	0	0	0	0	0	0	0	0	0	0	0	0	0	0
250.0/3.3 (14842)	250.037	3.34	14842	0	77.5261	0	18.2072	0	0	0	17.6778	0	0	0	0	0	27.131	0	0	0	0	0	0	0	0	0	0	0	0	0	0	0	0	0	0	0	0	0	0	0	0	0	0	0	0	0	0	0	0
250.0/1.1 (14845)	250.037	1.13	14845	523.38	1015.93	992.28	251.028	566.854	722.21	887.805	760.23	933.084	587.961	791.124	1006.35	790.038	986.548	1218.34	871.385	696.641	0	1224.76	899.29	1089.38	1189.85	1147.63	1270.55	1346.86	1104.87	1113.74	1242.25	37.2122	77.4464	0	0	0	0	0	0	0	0	0	0	0	0	0	0	0	0
250.0/1.6 (14844)	250.037	1.57	14844	0	0	0	0	856.561	0	0	0	0	0	0	0	0	0	0	0	0	0	0	0	0	0	1481.01	0	0	0	0	0	0	111.009	0	0	0	0	0	0	0	0	0	0	0	0	0	0	0	0
250.0/1.8 (14847)	250.038	1.81	14847	0	0	0	55.0572	0	174.457	0	0	0	0	0	0	0	0	0	0	0	0	0	0	25.0699	244.173	0	54.8357	0	0	0	0	69.1095	0	0	0	0	0	0	0	0	0	0	0	0	0	0	0	0	0
250.0/2.7 (14848)	250.039	2.7	14848	319.046	0	485.68	0	40.6021	0	0	0	0	0	7.23052	0	0	0	0	0	363.947	0	793.76	512.23	330.376	0	200.803	380.665	248.727	0	269.166	649.86	272.21	0	0	0	0	0	0	0	0	0	0	0	0	0	0	0	0	0
250.0/1.4 (14850)	250.041	1.39	14850	0	0	0	0	0	0	0	0	0	524.018	0	0	0	0	0	0	0	650.087	0	0	0	0	0	0	0	0	0	0	0	0	0	0	0	0	0	0	0	0	0	0	0	0	0	0	0	0
250.0/3.4 (14851)	250.041	3.38	14851	0	0	12.2086	0	4.74373	0	12.5681	0	0	29.6798	0	39.4667	0	0	0	0	46.5904	68.3287	0	0	0	0	0	0	0	0	0	0	0	0	0	0	0	0	0	0	0	0	0	0	0	0	0	0	0	0
250.1/3.9 (14854)	250.072	3.95	14854	0.854361	0	0	0	0	0	0	0	0	0	0	0	0	0	0	0	0	0	0	0	0	0	9.16651	8.18514	0	0	0	2.38092	0	0	0	0	0	0	0	0	0	0	0	0	0	0	0	0	0	0
250.1/3.4 (14855)	250.072	3.43	14855	2.83614	0	0	0	0	0	4.16799	5.47401	0	0	3.52953	4.66589	5.55772	4.51963	0	0	0	0	0	0	6.3257	0	2.25256	2.94351	4.72946	0	0	0	0	0	0	0	0	0	0	0	0	0	0	0	0	0	0	0	0	0
250.1/3.8 (14856)	250.074	3.78	14856	0	4.41561	0	0	0	0	0	0	0	0	0	0	11.1439	0	1.11065	0	0	0	3.43199	2.38806	0	0	0	0	0	4.97752	8.5399	0	0	0	0	0	0	0	0	0	0	0	0	0	0	0	0	0	0	0
250.1/4.7 (14872)	250.107	4.67	14872	0	0	0	0	0	0	0	0	0	0	0	0	0	0	0	0	0	0	0	0	0	0	0	0	0	0	0	0	0	0	0	0	0	0	0	0	0	0	0	0	0	0	0	0	0	0
250.1/7.3 (14883)	250.144	7.28	14883	0	0	0	0	0	0	0	0	0	0	0	0	0	0	0	0	0	0	27.5225	161.989	60.2805	167.463	75.721	160.321	0	17.0341	2.91155	0	0	0	0.937323	0	1.32917	0	0.640806	0	0	0.525821	0	0	0	0	0	0	0	0
250.2/12.5 (14888)	250.171	12.48	14888	0	0	0	0	0	0	0	0	0	0	0	10.9842	1.29575	0	0	0	0	0	0	0	0	0	0	0	0	0	0	0	0	0	0	11.2645	0	3.68341	0	0	0	0	0	0	0	0	0	0	0	0
250.2/12.4 (14891)	250.174	12.41	14891	0	0	0	0	0	0	0	0	15.7172	0	0	0	0	8.47443	22.3155	26.8968	0	0	0	0	0	0	38.0476	0	0	5.86415	8.62604	0	0	0	22.1521	0	10.5844	0	14.0526	42.8063	0	0	22.9015	0	0	0	0	0	0	1.97958
250.2/13.7 (14894)	250.177	13.67	14894	0	0	1.782	4.20758	0	2.65794	0	0	0	0	0	0	0	0	0	0	0	0	0	0	0	0	0	0	0	18.5187	6.58469	0	16.6392	0	0	0	0	0	0	0	0	0	0	0	0	0	0	0	0	0
250.2/11.5 (14896)	250.177	11.49	14896	564.54	347.021	347.89	172.022	262.706	171.471	426.28	612.263	504.375	0	723.421	602.183	287.862	156.827	229.623	312.164	243.014	0	48.0678	139.336	224.763	73.7851	311.883	154.426	184.254	101.562	116.59	307.477	154.684	179.885	457.338	1149.55	789.242	791.204	505.534	521.449	786.765	704.223	734.74	746.857	635.787	804.832	1286.83	935.533	951.536	708.09
250.2/12.8 (14897)	250.179	12.84	14897	0	0	3.89135	9.97651	17.3929	0	0	0	0	0	0	0	2.88353	0	6.97279	0	4.41877	0	0	11.9847	17.4111	0	0	3.85227	11.6061	0	3.6093	6.97032	0	10.7199	14.8465	0	0	0	0	0	0	0	0	0	0	0	0	0	0	0
250.2/14.4 (14900)	250.182	14.44	14900	0	7.6801	0	0	0	0	0	0	0	0	0	3.10624	0	0	0	0	0	0	0	0	0	0	0	0	0	0	0	0	0	0	0.383065	0	0	0	0	0	0	0	0	0	0	0	0	0	0	0
251.0/1.6 (14920)	251.039	1.65	14920	0	0	0	0	51.8485	0	0	0	0	0	0	0	0	0	0	0	0	0	7.64043	0	0	0	41.7343	0	0	0	0	13.0858	6.32815	9.66906	0	0	0	0	0	0	0	0	0	0	0	0	0	0	0	0
251.1/3.2 (14933)	251.097	3.16	14933	0	0	29.4563	0	0	0	0	0	0	0	6.92754	0	0	0	0	18.006	72.5164	0	5.61284	0	56.9347	0	67.2822	90.9908	23.7276	0	8.2176	54.9678	10.398	0	0	0	0	0	0	0	0	0	0	0	0	0	0	0	0	0
251.1/3.7 (14936)	251.099	3.71	14936	0	0	28.8264	0	29.4732	0	0	0	82.0085	0	0	0	0	0	60.4355	46.8628	70.5104	0	0	0	104.326	68.5994	120.528	87.033	91.7054	0	24.9545	66.073	45.2014	0	0	0	0	0	0	0	0	0	0	0	0	0	0	0	0	0
251.1/4.0 (14935)	251.099	3.98	14935	10.0359	0	5.14812	0	0	0	0	24.3732	37.6402	28.0831	21.6392	0	26.9365	0	32.5211	23.2163	9.7137	0	19.2595	0	25.9584	17.0998	21.8544	0	34.2786	0	0	20.8123	21.4584	0	0	0	0	0	0	0	0	0	0.837025	0	0	1.31359	0	0	0	0
251.1/3.4 (14937)	251.099	3.35	14937	0	0	0	0	2.47415	16.8752	0	0	2.73255	0	9.19851	8.62608	1.94623	0	46.6048	16.9002	0	0	0	2.46447	0	0	0	2.05024	3.06587	0	0	0	0	0	0	0	0	0	0	0	0	0	0	0	0	0	0	0	0	0
251.1/3.9 (14939)	251.099	3.86	14939	0	9.44598	0	0	0	0	14.5564	0	0	0	0	21.6503	0	5.97084	0	0	0	0	0	0	0	0	0	0	0	19.5657	0	0	0	0	0	0	0	0	0	0	0	0	0	0	0	0	0	0	0	0
251.1/3.5 (14940)	251.1	3.52	14940	46.7275	57.6407	12.7067	0	12.2659	26.479	58.8222	78.5022	0	68.3247	96.9868	60.5193	70.0319	23.0874	0	0	4.59247	19.2641	92.2366	64.2144	3.67099	12.8485	3.25152	3.25221	0	72.4021	96.8302	0	5.247	30.6075	0	0	0	0	0	0	0	0	0	0	0	0	0	0	0	0
251.1/2.0 (14942)	251.102	2	14942	0	4.61236	9.4171	0	0	5.51159	10.583	7.05508	16.8258	0	16.2925	7.44955	2.47269	0	13.605	24.8489	0	0	8.50731	9.30302	17.7991	4.05266	4.34124	0.808915	5.47122	12.5242	36.4217	17.3932	4.21213	0	0	0	0	0	0	0	0	0	0	0	0	0	0	0	0	0
251.1/1.6 (14950)	251.105	1.58	14950	118.008	71.1653	1.30186	0	0	10.8353	0	0	0	0	0	0	0	0	5.59489	13.8481	0	0	0	0	0	0	0	0	0	0	0	4.47367	5.26959	0	0	0	0	0	0	0	0	0	0	0	0	0	0	0	0	0
251.1/1.7 (14949)	251.105	1.69	14949	0	0	102.616	0	68.1571	50.827	0	0	0	0	0	0	4.8681	6.55464	0	0	0	0	11.4691	1.99434	2.42291	0	0	3.73689	0	0	0	52.7966	16.9433	45.6567	0	0	0	0	0	0	0	0	0	0	0	0	0	0	0	0
251.1/4.3 (14961)	251.138	4.28	14961	0	0	0	0	0	0	0	0	0	0	0	0	0	0	0	0	0	0	0	0	38.9887	0	0	20.0936	0	27.7058	0	0	0	0	0	0	0	0	0	0	0	0	0	0	0	0	0	0	0	0
251.1/4.2 (14965)	251.139	4.15	14965	0	0	0	0	0	0	0	0	0	0	0	0	0	0	0	0	0	0	31.4867	33.125	0	20.7106	0	0	0	0	0	0	0	0	0	0	0	0	0	0	0	0	0	0	0	0	0	0	0	0
251.1/1.2 (14970)	251.149	1.2	14970	32.6371	68.9147	56.7478	33.7229	87.2525	89.4523	79.9682	83.2584	68.442	96.6666	90.5688	77.5669	82.3258	73.4775	65.6521	68.0765	57.2742	5.26065	96.8008	109.507	79.4338	105.201	94.8564	118.519	47.3424	78.1199	92.1395	71.6266	27.1002	64.6263	0	0	0	0	0	0	0	0	0	0	0	0	0	2.90733	0.988201	0
251.1/2.2 (14971)	251.149	2.21	14971	0	0	0	657.546	75.8426	0	110.8	98.0829	0	0	113.608	0	19.7074	0	0	165.769	32.4533	0	16.0387	0	80.3886	0	15.3796	34.6352	3.52281	0	0	0	553.027	0	0	0	0	0	0	0	0	0	0	0	0	0	0	0	0	0
251.1/1.9 (14972)	251.149	1.89	14972	256.629	0	0	0	11.6272	0	0	0	0	0	2.28367	0	3.11741	11.8578	0	0	2.19918	0	0	34.9862	0	10.2588	0	6.4939	2.53393	0	0	0	22.108	3.37225	0	0	0	0	0	0	0	0	0	0	0	0	0	0	0	0
251.1/2.4 (14973)	251.15	2.36	14973	0	0	0	0	0	0	0	0	0	0	0	0	0	0	0	0	0	0	88.0387	0	0	0	0	48.0534	2.53739	0	0	0	0	239.485	0	0	0	0	0	0	0	0	0	0	0	0	0	0	0	0
251.1/3.1 (14974)	251.15	3.13	14974	79.4862	0	23.2154	0	0	0	0	0	0	0	0	0	0	0	0	0	29.8823	0	80.6705	0	14.7252	0	12.1258	34.5848	0	0	73.555	19.7136	143.337	38.3031	0	0	0	0	0	0	0	0	0	0	0	0	0	0	0	0
251.2/2.1 (14975)	251.15	2.1	14975	0	134.112	225.138	0	0	305.935	0	0	123.276	0	0	126.275	13.9167	75.9171	223.988	22.2577	8.02082	0	4.66094	16.0599	0	167.937	0	0	16.2599	141.915	300.495	197.038	0	0	0	0	0	0	0	0	0	0	0	0	0	0	0	0	0	0
251.2/2.0 (14978)	251.153	2.03	14978	0	0	0	9.95374	0	0	0	0	0	21.8693	0	0	0	0	0	0	0	83.2623	0	0	0	0	0	0	0	0	0	0	0	0	0	0	0	0	0	0	0	0	0	0	0	0	0	0	0	0
251.2/12.8 (14980)	251.16	12.8	14980	63.7697	38.8349	28.9532	11.1579	41.1496	9.2202	40.1712	52.7336	55.6297	2.9283	63.1152	44.4635	41.3971	10.5294	25.0851	46.9898	31.3742	0	0	8.75617	26.3617	0	57.7325	9.28628	27.9211	6.1815	4.93376	29.6269	7.53194	11.008	52.0043	69.1053	64.5503	34.5938	47.8858	35.0854	47.8106	35.9677	43.6792	40.1508	49.0319	42.142	58.0366	59.0331	70.8651	47.0083
251.2/8.2 (14981)	251.16	8.23	14981	12.8382	12.5861	16.4376	1.09963	3.70252	6.88211	0	6.31928	6.70369	2.47402	4.59233	0	0	0	0	7.93531	7.90782	0	10.9379	16.7651	10.1675	8.16491	23.0196	7.05317	9.75827	14.6883	10.3834	10.8924	11.6547	16.4464	54.5823	70.5105	65.2648	48.2455	51.1646	44.199	66.2329	71.5608	69.5262	51.415	60.9553	64.4857	62.0832	74.8888	58.7061	46.7632
251.2/14.2 (14982)	251.163	14.21	14982	76.6134	91.413	93.5007	56.8337	71.019	0	0	83.0814	129.324	0	111.95	99.2947	90.1673	0	80.2571	97.2406	74.5059	0	47.8867	85.2659	80.2734	43.7871	111.443	75.5475	88.726	78.9438	16.7852	80.9062	68.928	72.7096	53.5626	104.867	108.558	0	79.3575	68.2003	90.9423	79.7517	78.7093	93.8265	85.3695	85.7667	95.1501	109.098	90.7799	96.3552
251.2/13.0 (14984)	251.164	13.03	14984	5.36702	0	0	0	2.01271	0	0	0	0	0	0	0	3.09502	0	0	4.58141	0	0	0	0	0	0	3.42859	0.929613	0	0	0	4.8029	0	0	0	5.99448	4.32866	7.2048	0	0	0	0	0	0	3.71506	5.44019	3.60157	7.23534	7.36845	6.49418
251.2/14.2 (14986)	251.166	14.2	14986	0	0	0	0	0	63.2607	80.8458	0	0	71.9938	0	0	0	64.0758	0	0	0	67.6943	0	0	0	0	0	0	0	0	0	0	0	0	0	0	0	81.0264	0	0	0	0	0	0	0	0	0	0	0	0
251.2/12.4 (14993)	251.178	12.44	14993	0	0	2.59518	0	0	0	0	0	0	0	0	0	0	0	0	0	4.71982	0	0	0	0	0	0	0	0	0	0	0	0	0	0	10.6462	0	0	0	0	3.72279	5.4822	0	0	0	0	0	0	5.095	0
251.2/14.6 (14996)	251.181	14.56	14996	0	0	0	0	0	0	0	0	0	0	1.70737	0	0	0	0	1.15339	4.03071	0	0	0	0	0	2.89857	0	0	0	0	0.793156	0	0	0	0	6.61726	0	0	7.7252	0	0	0.822131	0	0	0	0	2.15038	0	3.10872
251.2/14.1 (15010)	251.202	14.07	15010	0	3.08708	0	0	0	0	0	0	0	2.96511	0	0	0	6.05993	0	0	0	0	0	0	0	0	0	0	0	0	0	0	0	0	0	0	0	0	0	0	0	0	0	0	0	0	0	0	0	0
252.0/1.2 (15021)	251.978	1.22	15021	0	0	0	0	0	0	0	1.6247	4.66565	51.6253	0	2.57622	37.8426	0	0	0	0	0	0	0	0	0	0	0	0	0	0	0	0	0	0	0	0	0	0	0	0	0	0	0	0	0	0	0	0	0
252.0/3.4 (15026)	252.034	3.41	15026	0	1.55449	0	0	0	2.11387	0	99.5784	82.8812	0	79.5534	0	88.615	0	78.664	0	0	0	0	0	0	0	0	0	0	0	0	0	0	0	0	0	0	0	0	0	0	0	0	0	0	0	0	0	0	0
252.0/1.8 (15028)	252.035	1.81	15028	0	0	0	3.43033	0	0	0	0	0	0	0	0	0	0	469.968	0	0	0	0	0	0	16.5892	0	0	0	0	0	0	0	0	0	0	0	0	0	0	0	0	0	0	0	0	0	0	0	0
252.0/2.6 (15029)	252.035	2.63	15029	0	0	27.8017	0	0	0	138.348	134.794	200.44	0	155.742	116.317	222.247	359.948	192.135	0	28.5711	0	47.6828	22.2265	18.262	0	13.1217	10.4975	4.91862	0	23.1713	37.8307	0	0	0	0	0	0	0	0	0	0	0	0	0	0	0	0	0	0
252.0/3.4 (15031)	252.037	3.36	15031	0	0	0	0	0	0	77.9671	0	0	172.044	0	100.391	0	189.195	0	0	0	1.29633	0	0	0	0	0	0	0	0	0	0	0	0	0	0	0	0	0	0	0	0	0	0	0	0	0	0	0	0
252.0/1.4 (15032)	252.038	1.38	15032	40.4245	81.1038	24.6406	0	0	7.96097	237.729	207.005	326.402	0	194.946	202.949	234.277	551.55	0	78.419	50.3381	44.9564	0	0	75.6627	7.05713	103.717	74.0896	75.6309	54.6339	23.7238	25.0444	0	0	0	0	0	0	0	0	0	0	0	0	0	0	0	0	0	0
252.0/1.6 (15033)	252.038	1.63	15033	0	0	0	0	0	0	14.3839	0	0	0	0	28.9332	67.2691	0	6.37676	0	26.227	0	6.7546	0	0	0	0	0	0	0	0	0	0	0	0	0	0	0	0	0	0	0	0	0	0	0	0	0	0	0
252.0/1.2 (15034)	252.038	1.19	15034	0	11.0222	0	0	0	18.0416	0	11.3047	0	367.233	0	59.5435	64.6387	77.492	0	0	16.4055	0	0	18.3186	0	0	0	0	0	0	0	0	0	0	0	0	0	0	0	0	0	0	0	0	0	0	0	0	0	0
252.0/2.4 (15035)	252.039	2.37	15035	0	0	0	0	0	0	50.569	38.8959	0	0	0	1.21285	0	0	0	0	0	0	0	0	0	0	0	0	0	0	0	0	0	0	0	0	0	0	0	0	0	0	0	0	0	0	0	0	0	0
252.0/1.7 (15037)	252.042	1.74	15037	0	0	0	0	0	0	0	0	0	37.0672	0	0	0	0	0	3.10544	0	0	0	0	0	0	0	0	0	0	0	0	0	9.69453	0	0	0	0	0	0	0	0	0	0	0	0	0	0	0	0
252.1/2.8 (15043)	252.072	2.83	15043	1.40794	0	0	0	0	0	3.84281	0	0	3.98021	0	4.06139	0	3.41046	9.43975	0	0	0	0	0	0	0	0	0	0	0	2.42405	0	0	0	0	0	0	0	0	0	0	0	0	0	0	0	0	0	0	0
252.1/1.1 (15049)	252.094	1.05	15049	23.1209	38.5799	31.615	0	45.0287	20.9048	0	15.2745	14.2368	12.4582	23.5585	20.1567	12.6633	0	24.9981	182.97	176.643	0	42.3899	0	0	33.0607	43.8545	25.4846	13.2218	18.8981	21.0027	115.903	163.826	154.03	0	0	0	0	0	0	0	0	0	0	0	0	0	0	0	0
252.1/5.2 (15056)	252.121	5.24	15056	0	0	0	0	0	0	0	0	0	0	0	0	0	0	0	0	0	0	0	0	694.748	0	530.05	673.552	391.87	0	0	0	0	0	0	0	0	0	0	0	0	0	0	0	0	0	0	0	0	0
252.1/5.1 (15057)	252.124	5.15	15057	0	0	0	0	0	0	0	0	0	0	0	0	0	0	0	0	0	0	883.518	612.45	0	631.389	0	0	0	784.705	852.537	0	0	0	0	0	0	0	0	0	0	0	0	0	0	0	0.546945	0	0	0
252.2/5.9 (15072)	252.155	5.93	15072	1.07941	0	0	0	0	0	0	0	0	0	0	0.600786	0	0	0	0	0	0	0	0	0	0	0	0	0	0.740897	0	2.41772	0	3.34915	37.8944	42.3998	36.5844	21.0554	20.5557	24.0845	25.9621	26.7276	32.9581	25.5492	22.2819	27.4373	25.3398	45.7467	31.4207	26.0369
252.2/6.9 (15073)	252.155	6.88	15073	6.00741	2.59594	13.1229	0	4.71209	0	0	0	0	0	0	0	0	0	0	0	0	0	0	0	0	0	0	0	0	0	0	0	0	0	58.2188	58.1944	57.4804	44.6387	39.7738	42.0921	0	0	0	0	0	0	0	0	2.95799	0
252.2/14.6 (15075)	252.157	14.63	15075	0	0	0	0	4.65207	3.29869	0	9.51754	0	0	0.698309	0	8.58503	5.88462	12.6408	7.21097	4.94252	0	8.96214	8.84362	7.26552	7.94077	7.40698	4.67698	8.69082	4.42524	0	5.20512	0	0	8.20347	9.5654	9.98878	1.25315	7.38683	2.88447	3.89986	7.57764	4.529	6.21348	1.58827	2.63584	3.1425	0	11.1897	0.957564
252.2/2.8 (15078)	252.16	2.8	15078	4.70389	0	0	0	0	0	4.04275	0	0	0	0	6.2321	4.14928	0	1.92455	0	0	0	0	0	0	0	0	0	0	0	0	0	0	0	0	0	0	0	0	0	0	0	0	0	0	0	0	0	0	0
252.2/3.7 (15082)	252.168	3.73	15082	7.2078	9.88291	17.5558	6.16364	12.1822	8.13949	0	0	0	0	0	0	0	0	0	3.94822	7.59336	4.24258	0	0	0	0	0	0	0	0	0	10.8154	0	7.87861	0	0	0	0	0	0	0	0	0	0	0	0	0	0	0	0
253.0/1.4 (15104)	253.04	1.38	15104	0	4.05748	0	0	0	0	25.4547	20.8907	30.0444	0	15.8535	20.8668	21.6684	41.2799	0	0	1.45194	0	0	0.189758	0	0	0	0	0	0	0	0	0	0	0	0	0	0	0	0	0	0	0	0	0	0	0	0	0	0
253.1/1.1 (15114)	253.113	1.12	15114	104.343	0	4.87474	0	168.911	0	0	9.89475	0	0	0	0	0	0	0	0	80.5308	0	0	0	0	0	0	0	0	0	0	0	0	453.508	0	0	0	0	0	0	0	2.21794	0	0	1.63284	0	0	0	0	0
253.1/2.2 (15117)	253.117	2.15	15117	0	0	0	444.219	0	0	0	0	0	0	0	0	0	0	0	0	39.7116	0	0	0	0	0	0	0	0	0	0	0	0	109.094	0	0	0	0	0	0	0	0	0	0	0	0	0	0	0	0
253.1/3.0 (15119)	253.117	3.02	15119	0	0	0	1000.43	0	0	0	0	0	0	0	0	0	0	0	0	0	0	0	0	0	22.8041	0	0	11.057	0	39.2798	7.15621	0	0	0	0	0	0	0	0	0	0	0	0	0	0	0	0	0	0
253.1/3.3 (15122)	253.117	3.31	15122	0	0	520.579	16.356	467.136	0	0	0	0	0	0	0	0	0	36.7216	0	114.46	0	0	0	32.8382	0	9.04394	0	0	0	0	650.814	657.465	0	0	0	0	0	0	0	0	0	0	0	0	0	0	0	0	0
253.1/2.8 (15123)	253.118	2.82	15123	544.811	0	15.824	0	21.8855	10.4088	27.5568	0	6.07042	0	16.3728	0	5.76282	0	9.93618	0	4.92519	0	72.7922	0	0	0	4.62477	22.5967	21.5865	0	25.3316	93.2292	37.8428	0	0	0	0	0	0	0	0	0	0	0	0	0	0	0	0	0
253.1/3.2 (15124)	253.118	3.2	15124	697.053	574.978	0	0	0	502.944	0	0	0	0	0	0	7.84962	8.35557	0	133.686	0	0	27.0728	8.30395	0	15.4859	0	0	0	0	0	0	31.7449	691.777	0	0	0	0	0	0	0	0	0	0	0.459307	2.39762	0	0	0.949153	0
253.1/1.9 (15125)	253.118	1.89	15125	285.37	81.3716	25.6784	0	14.3879	0	0	0	0	0	0	0	0	0	3.26012	0	0	8.36418	0	0	1.24788	0	0	0	0	0	0	0	3.81395	11.1714	0	0	0	0	0	0	0	0	0	0	0	0	0	0	0	0
253.1/1.4 (15126)	253.118	1.41	15126	105.057	49.7911	152.646	80.2578	78.3589	110.054	0	0	0	0	0	0	0	0	3.81531	51.7802	3.52646	18.0139	0	0	0	0	0	0	0	0	0	94.1577	48.7084	2.03052	0	0	0	0	0	0	0	0	0	0	0	0	0	0	0	0
253.1/2.1 (15127)	253.118	2.05	15127	0	310.377	219.418	28.2326	174.989	296.684	0	0	0	0	0	0	0	0	0	87.3423	0	32.4482	5.27501	1.88462	8.82402	5.673	0	0	0	0	0	317.252	258.636	0	0	0	0	0	0	0	0	0	0	0	0	0	0	0	0	0
253.1/3.4 (15128)	253.118	3.45	15128	21.1046	0	29.2519	0	0	7.06863	41.0493	36.3991	44.5719	0	51.7442	45.2824	38.9179	62.9532	48.3222	46.4589	31.2415	0	38.0543	28.4183	40.2773	14.1016	0	58.2845	47.4957	43.0525	39.4108	0	14.6043	19.8199	0	0	0	0	0	0	0	0	0	0	0	0	0	0	0	0
253.1/3.5 (15130)	253.121	3.45	15130	0	20.65	0	0	8.36015	0	0	0	0	39.6212	0	0	0	0	0	0	0	45.2346	0	0	0	0	0	0	0	0	0	0	0	0	0	0	0	0	0	0	0	0	0	0	0	0	0	0	0	0
253.1/1.0 (15138)	253.128	1.03	15138	0	0	0	0	0	61.2	0	0	0	0	0	0	0	0	0	0	83.1338	0	0	34.217	44.0026	28.1162	32.8882	15.3448	0	34.6671	13.1979	104.405	0	0	0	0	0	0	0	0	0	0	0	0	0	0	0	0	0	0
253.1/5.6 (15143)	253.141	5.57	15143	0	0	0	0	0	0	0	0	0	0	0	0	0	0	0	0	0	0	0	0	0	0	0	0	0	0	0	0	0	0	0	0	0	0	0	0	0	27.5076	8.40291	8.86556	0	4.83745	0	0	0	0
253.2/3.5 (15150)	253.152	3.47	15150	0	21.1582	0	0	0	4.24901	0	0	0.735618	0	0	0	0	0	0	0	0	0	0	0	0	0	0	0	0	0	0	0	18.5468	34.7462	0	0	0	0	0	0	0	0	0	0	0	0	0	0	0	0
253.2/15.2 (15154)	253.194	15.24	15154	0	0	0	0	0	0	0	4.8034	0	0	3.28866	1.10836	39.3705	0	15.9469	0	0	0	10.3305	0	3.08312	23.2495	3.8262	5.31644	4.81866	11.9967	7.86968	0	0	0	0	0	0	0	0	0	0	0	0	1.15463	0	0	0	0	0	0
253.2/15.1 (15155)	253.196	15.14	15155	0	0	0	0	0	0	4.97298	0	0	10.3577	0	0	0	31.4687	0	0	0	0	0	0	0	0	0	0	0	0	0	0	0	0	0	0	0	0	0	0	0	0	0	0	0	0	0	0	0	0
253.2/13.8 (15162)	253.214	13.76	15162	0	13.5879	25.1522	33.4591	9.41013	21.6236	0	27.3698	40.6289	0	0	23.9273	28.2501	0	13.3525	9.38926	29.0696	0	9.27856	17.2837	12.7865	0	5.05148	37.1275	18.3273	9.00063	0	13.5007	12.2542	14.5925	0	18.9411	26.5833	0	8.45587	9.92983	1.32016	17.2232	28.3905	32.3109	0	31.2856	26.3578	34.4601	10.4437	26.1751
253.2/15.0 (15164)	253.215	15.03	15164	11.8705	0	0	0	0	3.60933	0	3.20544	6.16853	0	0	0	0	0	0	4.04429	3.00599	2.5896	0	2.73459	0	0	4.60501	0	0.990229	0	0	2.72988	3.41235	0	2.42481	0	1.87488	0	2.73572	0	0	0	3.11041	0	0	0	0	0	0	1.29057
253.2/13.7 (15168)	253.218	13.73	15168	0	0	0	0	12.8578	0	0	0	0	40.7553	0	1.95105	0	0	0	0	0	26.5659	0	3.85042	0	0	0	0	0	0	0	0	0	0	0	0	0	3.60421	0	0	0	0	0	0	0	0	0	0	0	0
253.6/2.3 (15178)	253.635	2.32	15178	0	0	0	0	0	0	0	0	0	0	0	0	0	0	0	0	0	0	0	0	0	0	0	0	0	0	0	0	0	0	0	0	0	0	0	0	0	1.67987	0	0	0	8.57301	33.996	4.12633	1.93481	0
254.0/1.5 (15187)	254.008	1.48	15187	0	5.31239	0	0	30.657	21.2833	0	0	9.8501	0	6.87376	14.1094	0	0	0	0	0	0	0	0	0	0	0	0	0	7.99075	0	0	0	10.4796	0	0	0	0	0	0	0	0	0	0	0	0	0	0	0	0
254.0/2.0 (15188)	254.008	1.98	15188	30.393	0	0	0	0	0	0	0	0	0	0	0	0	0	21.7379	0	0	0	19.3514	0	0	40.2574	0	0	0	0	62.4193	0	13.0224	0	0	0	0	0	0	0	0	0	0	0	0	0	0	0	0	0
254.0/1.1 (15190)	254.009	1.07	15190	0	0	3.27034	360.203	0	16.0975	0	0	0	0	0	0	0	0	0	0	0	0	14.1343	0	6.81551	47.5836	0	5.46114	0	10.2098	0	14.4886	45.6081	54.6281	0	0	0	0	0	0	0	0	0	0	0	0	0	0	0	0
254.0/1.3 (15193)	254.013	1.31	15193	0	0	0	0	0	0	0	0	0	0	0	0	0.77962	1.49219	0	0	0	27.3756	0	0	0	0	0	0	0	0	0	0	0	0	0	0	0	0	0	0	0	0	0	0	0	0	0	0	0	0
254.0/3.4 (15195)	254.03	3.39	15195	0	0	0	0	0	0	4.35386	0	0	1.99241	3.79136	8.00129	3.22211	0	0	0	0	0	0	0	0	0	0	0	0	0	0	0	0	0	0	0	0	0	0	0	0	0	0	0	0	0	0	0	0	0
254.1/1.1 (15200)	254.053	1.08	15200	0	0	0	0	0	0	0	0	0	0	0	0	0	0	0	0	0	0	7.77657	0	0	12.3624	0	0	0	0	0	3.88715	0	0	0	0	0	0	0	0	0	0	0	0	0	0	0	0	0	0
254.1/7.6 (15201)	254.057	7.64	15201	3.72743	0	1.64827	0	0	0	0.840436	1.25334	0	0	2.63609	0	0	0	1.99141	3.79828	0	0	2.00514	0	0	0	0	0	0	0	3.37597	0	4.39908	0	0	0	0	0	0	0	0	0	0	0	0	0	0	0	0	0
254.1/1.9 (15202)	254.074	1.85	15202	0	0	0	0	0	0	0	0	0	0	0	0	0	0	0	0	0	0	0	7.72108	0	0	0	0	2.94198	5.27576	11.408	2.54076	0	0	0	0	0	0	0	0	0	0	0	0	0	0	0	0	0	0
254.1/2.7 (15205)	254.075	2.66	15205	0	0	0	0	0	0	0	0	0	0	0	0	13.517	0	0	0	35.9635	0	0	0	0	0	0	0	17.3265	0	0	2.02487	0	0	0	0	0	0	0	0	0	0	0	0	0	0	0	0	0	0
254.1/1.1 (15210)	254.081	1.14	15210	0	0	0	0	0	0	16.994	0	0	10.817	0	0	0	11.1546	0	0	20.2345	21.7019	18.403	0	0	0	0	0	0	0	0	0	0	0	0	0	0	0	0	0	0	0	0	0	0	0.67869	0	0	0	0
254.1/4.9 (15213)	254.092	4.89	15213	13.2981	4.43474	0	137.213	12.7499	0	0	0	0	0	0	0	0	0	0	13.195	15.3197	5.42578	2.24359	0	0	0	0	0	0	5.23109	0	12.4588	15.8669	0	0	0	0	0	0	0	0	0	0	0	0	0	0	0	0	0
254.1/3.5 (15216)	254.1	3.48	15216	0	0	0	0	0	0	0	0	0	0	0	0	0	0	0	0	0	0	0	0	0	0	0	0	17.0646	64.5478	64.7543	0	0	0	0	0	0	0	0	0	0	0	0	0	0	0	0	0	0	0
254.1/3.1 (15217)	254.101	3.14	15217	0	0	0	0	0	0	0	0	0	0	0	0	0	0	0	0	0	0	0	0	0	0	322.196	0	276.674	0	62.678	0	0	0	0	0	0	0	0	0	0	0	0	0	0	0	0	0	0	0
254.1/3.7 (15218)	254.102	3.71	15218	0	0	0	0	0	0	0	0	0	0	0	0	0	0	0	0	0	0	0	0	1.37957	659.99	533.869	664.343	366.301	0	0	0	0	0	0	0	0	0	0	0	0	0	0	0	0	0	0	0	0	0
254.1/1.1 (15219)	254.103	1.12	15219	0	0	0	0	0	0	0	0	0	0	0	0	0	0	0	0	0	0	0	0	0	0	0	0	0	0	0	0	0	0	0	0	0	0	0	0	0	0	2.08724	11.2171	12.8902	7.77398	11.8123	0	11.7426	0
254.1/1.0 (15221)	254.111	1.05	15221	77.2704	77.9648	77.2842	0	86.6789	80.8396	0	0	0	0	0	9.15384	0	0	4.05335	72.5824	75.1614	62.2834	0	0	0	13.0448	10.1336	0	0	0	0	129.798	97.3615	93.7875	0	0	0	0	0	0	0	0.398997	0	0	0	0	0	7.50554	0	0
254.1/4.2 (15227)	254.12	4.16	15227	0	0	0	0	0	0	0	0	0	0	0	12.2677	4.16334	68.1856	3.66193	0	0	0	0	0	0	0	0	0	0	0	0	0	0	0	0	0	0	0	0	0	0	0	0	0	0	0	0	0	0	0
254.2/4.9 (15244)	254.159	4.92	15244	95.8545	71.5935	69.4867	0	74.7502	39.6511	83.7343	0	75.8326	72.7963	88.242	86.4656	77.5022	68.9935	126.495	99.8494	0	0	0	0	0	99.0972	0	93.4897	0	0	0	94.7702	86.7139	64.6894	0	0	0	0	0	0	0	0	0	0	0	0	0	0	0	0
254.2/1.6 (15245)	254.16	1.55	15245	1583.39	375.428	1167.26	0	14.4193	894.516	0	0	0	0	0	410.023	0	0	755.942	0	0	0	1735.76	330.965	529.414	1491.59	0	0	0	539.026	1748.65	932.253	2028.51	0	0	0	0	0	0	0	0	0	0	0	0	0	0	0	0	0
254.2/1.1 (15248)	254.16	1.15	15248	1766.76	1663.52	1589.5	2653.89	1793.64	1727.45	2210.02	1945.69	2017.6	2283.63	1899.33	2135.81	1908.84	2206.02	2167.09	2438.13	2110.36	0	2624.59	2301.8	2290.19	2840.25	2498.25	2532.45	152.734	2390.13	2801.88	2190.39	2325.02	1856.39	0	1.12306	0	0	0	0	24.0053	32.2887	36.8847	15.4596	19.2874	12.3447	25.3613	19.8136	29.2234	0.889002
254.2/1.7 (15247)	254.16	1.72	15247	0	331.024	0	1369.05	307.807	0	456.836	392.425	504.905	0	445.923	332.205	404.882	387.736	543.929	789.346	698.348	0	0	323.483	0	0	741.29	639.949	46.9187	559.06	0	0	0	1323.12	0	0	0	0	0	0	0	0	0	0	0	0	0	0	0	0
254.2/2.0 (15249)	254.16	2.02	15249	0	0	0	2068.04	0	0	525.912	0	0	0	0	0	635.741	0	0	0	0	0	0	0	0	0	816.13	669.875	46.5164	0	0	0	0	1759.99	0	0	0	0	0	0	0	0	0	0	0	0	0	0	0	0
254.2/1.9 (15250)	254.161	1.89	15250	0	0	752.371	0	357.58	1144.06	0	511.141	461.451	164.786	609.85	0	0	506.702	0	769.896	627.133	0	1164.66	0	576.098	1275.29	0	0	5.24289	0	1075.5	767.485	2027.02	0	0	0	0	0	0	0	0	0	0	0	0	0	0.941669	0	0	0
254.2/12.5 (15255)	254.21	12.53	15255	25.1295	0	3.07603	0	2.80387	2.77866	9.083	2.16464	17.8597	0	20.7404	8.2972	3.92327	0	9.97581	6.75774	6.49556	0	2.53312	0	6.44218	0	5.27873	3.7522	1.48039	0	0.749313	4.72139	0	4.14922	0	9.05857	13.7563	0	4.74503	0	3.94947	3.13602	6.42594	9.18357	3.96148	8.25459	0	9.27582	3.29525	8.28139
254.2/12.1 (15257)	254.212	12.12	15257	119.443	80.2767	71.3629	50.7409	64.7629	53.8492	86.0196	108.562	98.8319	71.1713	139.264	114.015	69.1973	69.6692	63.3073	58.0602	65.9163	72.0776	55.4334	58.204	63.0826	48.1619	73.0238	73.4717	62.2643	66.7963	38.6136	53.0457	44.4241	77.1717	54.3452	90.263	72.0871	77.6742	48.7175	52.057	71.8419	75.1497	65.6045	66.5167	60.1686	75.7181	89.9096	83.4084	86.6055	66.8438
255.0/1.2 (15273)	254.957	1.15	15273	0	0	0	224.079	0	0	0	0	0	0	0	0	0	0	0	0	0	0	0	19.447	0	0	0	0	0	0	0	0	17.4821	0	0	0	0	0	0	0	0	0	0	0	0	0	0	0	0	0
255.0/1.2 (15275)	254.965	1.23	15275	0	0	0	0	0	0	0	0	0	0	0	5.66597	15.4876	0	0	0	0	0	2.59681	0	0	0	0	0	0	0	0	0	0	0	0	0	0	0	0	0	0	0	0	0	0	0	0	0	0	0
255.0/1.0 (15278)	254.976	1.03	15278	0	0	0	0	0	0	0	2.56757	0	196.941	0	9.72373	0	115.251	0	0	0	0	0	0	0	0	0	0	0	0	0	0	0	0	0	0	0	0	0	0	0	0	0	0	0	0	0	0	0	0
255.1/5.4 (15281)	255.055	5.39	15281	0	0	0	0	0	0	0	0	0	0	0	0	0	0	0	0	0	0	0	0	0	0	0	0	0	0	0	0	0	0	0	0	0	0	0	0	44.6244	58.5058	55.7592	53.2603	35.4232	25.6934	53.8896	27.9866	43.5071	0
255.1/7.6 (15282)	255.065	7.61	15282	1728.73	1060.64	1036.6	825.763	879.041	826.888	1126.19	1007.54	1246.98	1130.87	1014.7	1167.47	989.939	826.178	1495.89	1353.96	963.734	1399.22	1223.83	543.36	493.534	1219.15	689.72	597.377	780.588	576.003	1431.31	1152.62	1760.35	741.039	0	0	0	0	0	0	0	0	0	0	0	0	0	0	0	0
255.1/5.9 (15283)	255.066	5.93	15283	0	0	0	0	0	0	11.1052	8.40748	12.431	0	7.63084	17.3768	18.9214	10.7005	21.9738	0	0	0	0	0	0	0	0	0	0	0	0	0	0	0	0	0	0	0	0	0	0	0	0	0	0	0	0	0	0	0
255.1/1.1 (15290)	255.098	1.06	15290	0	0	0	0	0	39.2084	30.7489	0	0	4.68092	0	0	0	0	0	0	0	81.9993	0	0	0	0	0	0	0	0	0	0	0	0	0	0	0	0	0	0	0	0	0	0	0	0	0	0	0	0
255.1/8.2 (15303)	255.116	8.16	15303	4.25922	0	0	19.6299	4.48549	1.25933	0	0	0	0	0	0	0	0	0	5.94516	5.17061	0	0	0	0	0	0	0	0	0	0	4.5131	6.64371	0	0	0	0	0	0	0	0	0	0	0	0	0	0	0	0	0
255.1/7.6 (15304)	255.117	7.59	15304	9.99791	3.31422	0	78.9799	2.43636	0	0	0	0	0	0	0	0	0	0	0	4.86015	0	0	0	0	0	0	0	0	0	0	0	0	1.34051	0	0	0	0	0	0	0	0	0	0	0	0	0	0	0	0
255.1/1.1 (15311)	255.127	1.13	15311	0	0	2.18355	0	28.1433	0	0	0	0	0	0	0	0	0	0	0	0	0	0	0	0	0	0	0	0	0	0	5.39106	0	0	0	0	0	0	0	0	0	0	0	0	0	0	2.27071	1.52885	0	0
255.1/1.1 (15314)	255.133	1.1	15314	0	8.70732	0	0	0	12.8424	0	0	0	0	0	0	29.0858	0	0	33.3131	0	0	0	0	41.5488	33.0582	0	52.8609	120.309	47.8323	78.0694	0	0	0	0	0	0	0	0	0	0	0	1.05711	0	0	0	0	0	0	0
255.1/1.0 (15317)	255.14	1.03	15317	0	0	0	0	0	0	0	77.2478	56.5114	0	61.3964	76.056	0	0	89.9371	0	0	0	0	101.884	0	0	0	0	0	0	0	0	0	0	0	0	0	0	0	0	0	1.49504	0	0	0	1.75097	0	0	1.26953	0
255.1/3.6 (15318)	255.142	3.57	15318	2.81194	0	0	0	0.951605	0	5.43314	0	4.52329	0	5.11297	0	0	0	9.29573	0	0	0	0	0	0	0	0	0	0	0	0	0	0	0	0	0	0	0	0	0	0	0	0	0	0	0	0	0	0	0
255.1/1.1 (15320)	255.143	1.05	15320	302.795	379.358	441.829	772.532	371.231	412.508	0	0	0	0	0	0	48.5297	0	0	317.646	340.45	0	137.392	0	107.165	78.1728	131.178	26.8096	0	52.2852	0	453.483	406.124	444.2	0	0	0	0	0	0	0	0	1.00009	2.20426	1.25377	0	1.28196	0	0	0
255.1/4.2 (15321)	255.144	4.24	15321	0	0	0	0	0	0	17.8408	6.8682	12.6883	0	17.9108	21.361	17.9831	0	57.7441	0	0	0	0	0	0	0	0	0	0	0	0	0	0	0	0	0	0	0	0	0	0	0	0	0	0	0	0	0	0	0
255.2/14.5 (15351)	255.232	14.5	15351	260.444	0	0	0	0	0	0	0	0	0	0	0	0	0	0	0	2.48768	0	0	2.4597	0	0	0	4.41943	0	0	0	0	0	0	0	0	2.56085	0	0	2.10066	0	0	0	0	0	0	0	0	0	6.53742
255.2/14.2 (15355)	255.235	14.15	15355	13.5919	0	0	0	0	1.91953	0	0	0	0	0	0	0	0	0	0	0	0	0	0	0	0	0	0	0	0	1.56318	0	0	0	3.02468	0	0	0	0	0	0	0	7.3704	0	0	0	0	0	0	0
256.1/1.1 (15369)	256.088	1.1	15369	0	0	11.9284	0	5.7371	0	0	0	0	42.7889	0	46.4619	0	0	0	0	0	0	0	31.4692	0	0	2.87367	0	0	20.3733	0	0	7.98618	0	0	0	0	0	0	0	0	0	0	0	0	0	0	0	0	0
256.1/7.3 (15377)	256.121	7.33	15377	0	0	0	4.81996	0	0	3.03694	5.14891	0	4.76032	14.2218	0	0	0	0	0	0	0	0	0	0	0	0	0	0	0	0	0	0	0	0	0	0	0	0	0	0	0	0	0	0	0	0	0	0	0
256.1/1.1 (15378)	256.123	1.15	15378	0	0	0	0	0	0	0	0	0	0	0	0	0	0	0	0	0	0	0	9.30947	0	0	0	0	0	0	8.19366	0	0	0	0	0	0	0	0	0	0	0	0	0	0	0	0	0	1.74418	0
256.1/8.4 (15383)	256.133	8.38	15383	0	0	0	0	0	0	0	0	0	0	0	0	0	0	0	0	0	0	55.7308	33.5248	37.0717	52.744	32.1381	34.4317	31.5613	41.4188	44.7456	0	0	0	0	0	0	0	0	0	0	0	0	0	0	0	0	0	0	0
256.2/3.8 (15392)	256.174	3.82	15392	13.3071	0	7.91	2.3779	0	4.07695	0	0	0	0	0	0	0	0	0	0	0	0	0	0	0	0	0	0	0	0	0	0	0	0	0	0	0	0	0	0	0	0	0	0	0	0	0	0	0	0
256.2/1.9 (15393)	256.175	1.93	15393	130.892	1.3607	8.5505	1.26533	0	4.38393	0	0	0	0	0	0	0	0	0	0	0	0	0	2.02004	0	0	0	0	0	1.24465	0	0	0	0	0	0	0	0	0	0	0	0	0	0	0	0	0	0	0	0
256.2/2.3 (15396)	256.176	2.33	15396	0	0	0	0	2.89096	0	32.5693	39.3457	0	0	56.9348	0	0	8.00364	0	73.5951	0	0	0	0	0	0	0	0	0	0	0	5.06353	117.101	0	0	0	0	0	0	0	0	0	0	0	0	0	0	0	0	0
256.2/2.5 (15397)	256.177	2.54	15397	0	0	0	0	0	0	0	0	0	0	0	0	49.2773	0	0	0	56.3932	0	0	0	0	2.22688	89.9764	55.2641	0	0	0	0	0	206.348	0	0	0	0	0	0	0	0	0	0	0	0	0	0	0	0
256.2/2.1 (15398)	256.177	2.11	15398	0	47.7861	16.004	0	0	0	6.92005	0	34.7658	1.95536	0	37.068	0	8.19381	78.2616	0	0	37.6664	0	3.46529	2.58267	4.96238	0	0	0	25.0397	81.7894	11.4532	39.5854	0	0	0	0	0	0	0	0	0	0	0	0	0	0	0	0	0
256.2/13.7 (15400)	256.227	13.66	15400	35.1393	19.4653	10.6432	0	4.76877	0	0	0	18.423	0	16.8965	12.8012	18.558	10.2092	9.18391	17.713	20.8402	0	0	12.4558	5.95222	3.44843	16.5206	12.5522	9.70047	0	1.73471	10.0754	16.6514	0	7.03624	19.4746	8.9645	11.0115	11.8397	10.9253	9.61715	14.826	24.3163	16.4627	5.64599	16.4522	20.5639	22.5933	17.3726	19.535
256.2/12.9 (15401)	256.227	12.93	15401	585.781	314.756	237.064	149.615	211.222	127.085	350.849	381.635	386.872	0	444.955	377.517	297.733	158.856	253.129	272.83	198.708	0	103.548	126.448	198.623	98.875	251.408	176.039	164.262	120.393	120.353	183.991	119.663	157.646	218.943	404.429	391.39	355.271	306.867	285.301	358.852	308.314	346.283	381.436	310.271	348.162	381.516	431.449	384.407	375.421
256.9/1.3 (15414)	256.877	1.27	15414	0	0	0	322.28	0	0	0	0	0	0	0	0	0	0	0	0	0	0	0	0	0	0	0	0	0	0	0	0	0	0	0	0	0	0	0	0	0	0.812287	0	0	0	0	0	0	0	0
257.1/1.0 (15421)	257.053	1.05	15421	0	0	0	0	0	0	0	0	0	0	0	0	0	0	0	0	0	0	0	0	0	3.77248	12.3504	0	5.28164	0	0	0	0	0	0	0	0	0	0	0	0	0	0	0	0	0	0	0	0	0
257.1/12.1 (15424)	257.072	12.12	15424	82.1713	101.526	56.1142	23.2615	72.4586	34.5519	0	0	0	0	0	0	0	0	0	86.8093	68.0641	78.9646	5.77417	0	0	5.33958	9.51773	0	14.6053	0	0	74.5839	82.1965	56.3437	0	0	0	0	0	0	0	0	0	0	0	0	0	0	0	0
257.1/3.7 (15430)	257.089	3.74	15430	0	3.6093	0	0	1.44539	0	0	3.75547	0	1.64061	0	0	0	0	0	0	0	0	0	0	0	0	0	0	0	0	0	0	0	0	0	0	0	0	0	0	0	0	0	0	0	0	0	0	0	0
257.1/3.7 (15435)	257.093	3.74	15435	3.8465	0	0.793165	0	0	0	4.5697	0	0.6158	0	0	0	3.91102	0	11.7332	12.0803	2.76949	3.90355	5.3786	0	0	0	0	0	0	0	5.02141	24.9474	10.7909	0	0	0	0	0	0	0	0	0	0	0	0	0	0	0	0	0
257.1/9.4 (15436)	257.103	9.4	15436	0	0	0	0	0	0	103.179	119.93	122.391	0	108.61	103.137	77.4418	10.4637	82.4255	0	0	0	0	0	0	0	0	0	0	0	0	0	0	0	0	0	0	0	0	0	7.09759	5.67843	2.27155	14.9995	2.06101	3.22954	2.13415	0	2.92324	0
257.1/1.7 (15439)	257.11	1.67	15439	0	0	0	0	0	0	0	0	0	0	0	0	0	0	0	0	0	0	0	0	0	0	0	0	26.9681	0	0	0	0	0	0	0	0	0	0	0	0	0	0	1.63301	0	0	1.37914	0	0	0
257.1/1.8 (15441)	257.111	1.8	15441	0	0	0	7.74233	0	0	15.4377	0	0	0	0	0	7.50318	0	0	0	0	0	0	0	0	0	41.7747	0	0	0	0	0	0	31.0843	0	0	0	0	0	0	0	0	0	0	0	0	0	0	0	0
257.1/1.8 (15444)	257.114	1.8	15444	0	0	0	0	0	0	0	0	0	7.74491	10.0196	0	0	0	0	0	0	0	49.8447	0	0	0	0	7.10207	3.04282	0	0	0	0	0	0	0	0	0	0	0	0	0	1.89135	0	0	0	0	0	0	0
257.1/1.5 (15446)	257.115	1.48	15446	5.83184	1.30274	0	0	0	0	0	0	0	0	0	0	0	0	2.47182	0	0	0	0	0	0	0	0	0	0	2.90894	0	0	0	0	0	0	0	0	0	0	0	0	0	0	0	0	0	0	0	0
257.1/1.0 (15455)	257.133	1.04	15455	0	0	4.16077	202.694	0	0	0	0	0	0	0	0	0	0	0	0	0	0	0	0	0	0	11.3743	8.04542	0	0	22.8219	0	0	0	0	0	0	0	0	0	0	0	0	0	0	0	0	0	0	0
257.1/1.0 (15459)	257.147	1	15459	183.368	669.995	585.532	403.786	533.583	573.619	0	0	0	0	0	0	0	0	0	721.632	694.007	0	17.762	15.8508	16.6731	60.5393	34.4667	23.296	0	13.6792	3.98325	651.667	700.844	652.61	0	0	0	0	0	0	0	0	0	0	0	0	0	0	0	0
257.2/2.9 (15460)	257.161	2.89	15460	0	0	0	0	0	0	0	0	2.1516	0	0	0	9.07929	9.26268	12.6085	0	0	1.9458	0	0	0	0	0	0	1.44208	0	0	0	0	0	0	0	0	0	0	0	0	0	0	0	0	0	0	0	0	0
257.2/4.6 (15461)	257.164	4.6	15461	15.1788	6.70908	5.36012	0	5.29703	0	5.93638	11.954	14.8099	0	14.8333	8.8313	7.9807	7.66376	18.9364	15.5936	6.26964	0	0	0	8.40651	14.6302	5.137	5.98055	13.1441	6.77859	0	12.9594	13.7293	0	0	0	0	0	0	0	0	0	0	0	0	0	0	0	0	0
257.2/3.0 (15465)	257.172	2.99	15465	68.8764	11.4526	26.7865	0	27.5623	35.8263	0	0	0	0	0	0	0	0	0	0	0	0	0	0	0	0	0	0	0	0	0	0	0	4.21767	0	0	0	0	0	0	0	0	0	0	0	0	0	0	0	0
257.2/14.0 (15477)	257.209	14.04	15477	0	0	9.08883	4.28021	5.14354	4.80504	5.37245	3.54217	4.60811	7.45091	0	0	3.25068	0	0	0	0.763229	0	0	0	0	0	0	3.66038	6.57041	0	0	4.75436	0	0	0	0	0	11.0834	0	2.5521	8.81503	0	12.4388	0	3.92208	4.24179	9.49087	0	11.889	0
257.2/14.1 (15478)	257.212	14.06	15478	31.476	0	0	0	0	0	0	0	0	0	0	6.53194	0	6.18532	6.70644	6.12352	0	0	3.58294	0	0	0	6.54937	0	0	0	0	3.08268	4.64256	0	0	0	6.6132	0	12.8309	0	0	0	0	4.33565	0	0	0	3.5413	0	0
257.2/13.8 (15485)	257.246	13.79	15485	3.92431	174.307	0	119.645	140.273	127.722	167.276	167.409	418.426	173.903	192.437	163.307	310.801	116.041	450.678	222.406	124.046	198.47	235.007	136.185	155.326	80.0074	180.067	386.012	181.86	118.222	0	166.563	131.124	183.914	202.801	154.713	181.88	304.311	281.154	214.082	375.827	129.928	471.233	0	242.408	332.159	187.182	417.955	200.924	484.908
257.2/15.8 (15488)	257.247	15.75	15488	205.955	0	0	0	0	0	0	0	0	0	0	0	0	0	0	0	0	0	0	0	0	0	0	0	0	0	6.39839	0	0	0	0	0	0	0	0	0	0	0	0	1.56311	0	0	0	0	0	0
257.2/14.0 (15489)	257.247	13.95	15489	0	0	159.577	0	0	0	0	0	0	0	0	0	0	0	0	0	0	0	17.3297	0	0	0	0	0	0	0	307.85	0	0	0	0	0	0	0	0	0	0	0	0	201.873	0	0	0	0	0	0
258.0/1.5 (15498)	257.993	1.46	15498	0	0	0	0	0	0	0	0.834449	0	0	0	0	0	0	0	0	0	0	0	3.77	0	28.7823	0	0	0	0	15.9233	0	0	0	0	0	0	0	0	0	0	0	0	0	0	0	0	0	0	0
258.1/1.9 (15500)	258.062	1.86	15500	0	0	0.531813	12.4887	0	0	0	0	0	0	0	0	0	0	0	0	0	0	0	0	0	0	0	0	0	0	0	1.06172	0	0	0	0	0	0	0	0	0	0	0	0	0	0	0	0	0	0
258.1/3.9 (15502)	258.077	3.87	15502	0	0	0	0	0	0	0	14.5574	0	0	0	0	0	0	37.1349	72.7393	0	0	0	0	0	10.1791	20.451	25.7064	13.7342	0	0	33.6785	27.579	10.5733	0	0	0	0	0	0	0	0	0	0	0	0	0	0	0	0
258.1/3.3 (15503)	258.077	3.35	15503	0	0	0	0	0	0	0	10.2135	0	0	4.50204	0	4.85902	0	0	0	0	0	0	0	0	0	0	0	0	0	0	0	0	0	0	0	0	0	0	0	0	0	0	0	0	0	0	0	0	0
258.1/3.7 (15504)	258.078	3.71	15504	0	0	0	0	0	0	0	4.34013	0	0	0	0	24.2908	12.5819	16.5275	0	0	0	28.2401	22.9193	0	0	0	0	7.88442	6.80796	19.5232	0	0	0	0	0	0	0	0	0	0	0	0	0	0	0	0	0	0	0
258.1/3.4 (15505)	258.081	3.4	15505	0	0	0	0	0	0	5.36702	0	0	0	0	7.28233	0	8.47661	0	0	0	0	0	0	0	0	0	0	0	0	0	0	0	0	0	0	0	0	0	0	0	0	0	0	0	0	0	0	0	0
258.1/3.7 (15507)	258.084	3.72	15507	0	0	0	0	0	0	2.0248	0	0	0	0	0	1.72773	0	0	0	0	0.510287	0	0	0	0	0	0	0	0	0	0	0	0	0	0	0	0	0	0	0	0	0	0	0	0	0	0	0	0
258.1/1.1 (15508)	258.095	1.1	15508	0	0	0	0	0	0	0	0	0	0	0	0	0	0	0	0	0	0	0	0	0	0	0	0	0	0	0	0	0	0	0	0	0	0	0	0	0	0	0	201.597	174.776	114.688	215.618	125.674	148.194	0
258.1/1.1 (15510)	258.101	1.12	15510	0	0	0	0	0	0	0	0	0	0	0	0	0	0	0	0	0	0	0	0	0	0	0	0	0	0	0	0	0	0	0	0	0	0	0	0	0	0	0	0	0	0	0	0	0	0
258.1/1.1 (15512)	258.107	1.11	15512	423.466	73.3051	290.867	0	233.046	0	0	378.081	376.71	242.663	360.379	232.355	281.423	278.447	451.832	544.117	596.345	0	402.93	315.52	373.573	323.645	399.601	389.063	566.756	378.049	457.925	419.501	494.71	552.662	0	0	0	0	0	0	0	4.46583	0	0	0	0	0	0	0	0
258.1/1.1 (15516)	258.111	1.1	15516	0	0	0	14.1691	0	153.742	0	0	0	0	0	0	0	0	0	0	0	210.885	0	0	0	0	0	0	0	0	0	0	0	0	0	0	0	0	0	0	0	0	0	0	0	0	0	0	0	0
258.1/4.8 (15519)	258.126	4.8	15519	0	0	0	0	0	20.7467	0	0	0	8.33624	0	0	0	0	0	0	0	28.256	0	0	0	0	0	0	0	0	0	0	0	0	0	0	0	0	0	0	0	0	0	0	0	0	0	0	0	0
258.1/1.0 (15528)	258.145	1.03	15528	367.077	497.521	550.055	0	0	0	0	546.93	505.734	0	516.574	588.254	525.41	0	623.006	617.246	671.338	0	792.649	725.394	929.169	843.421	699.892	763.555	778.091	920.607	803.446	797.184	619.353	0	0	0	0	0	0	0	0	0	0	2.3911	0	0	0	0	0	0
258.1/1.0 (15529)	258.148	1.02	15529	0	0	0	679.263	475.889	633.564	588.923	0	0	606.844	0	0	0	760.718	0	0	0	625.097	0	0	0	0	0	0	0	0	0	0	0	593.532	0	0	0	0	0	0	0	0	0	0	0	0	0	0	0	0
258.2/2.8 (15533)	258.159	2.78	15533	16.3358	0	0	0	3.4226	6.65614	0	0	0	0	0	0	0	0	0	8.09194	0	0	1.99313	0	0	0	0.48269	0	1.0468	0	0	0	0	0	0	0	0	0	0	0	0	0	0	0	0	0	0	0	0	0
258.2/3.0 (15536)	258.168	3.03	15536	6.12013	0	0	0	0	0	36.2156	15.7604	42.7504	0	43.1973	25.5182	28.4308	20.0102	65.9801	0	0	0	0	0	0	0	0	0	0	0	0	0	0	0	0	0	0	0	0	0	0	0	0	0	0	0	0	0	0	0
258.2/7.9 (15540)	258.204	7.86	15540	0	0	0	0	0	0	0	0	0	0	0	0	0	0	0	0	0	0	14.4496	39.5487	17.4169	52.2749	22.239	59.9003	5.57703	18.7356	14.5319	0	0	0	0	0	0	0	0	0	0	0	0	0	0	0	0	0	0	0
258.2/12.4 (15542)	258.206	12.39	15542	139.948	102.674	90.3013	42.4495	64.031	53.1648	115.674	128.875	147.214	131.626	177.049	175.63	83.4885	75.0021	108.489	84.6795	106.616	0	37.7479	55.0931	67.7735	38.3283	150.353	68.581	51.193	44.7302	38.3269	53.0544	44.3934	54.4236	67.7347	143.26	158.274	118.895	95.6112	102.366	112.812	108.313	132.284	131.954	88.068	128.756	145.204	177.433	150.615	103.41
258.3/13.1 (15553)	258.279	13.1	15553	1230.94	0	0	0	0	0	0	0	0	0	0	0	0	0	593.159	0	0	0	293.058	0	0	332.68	0	0	0	0	290.335	0	450.237	0	561.031	0	1000.48	0	813.75	0	0	0	0	0	0	0	0	0	0	0
258.3/13.0 (15554)	258.279	13	15554	0	926.77	493.613	495.621	725.627	539.501	1070.47	1195.87	912.785	993.737	1285.57	1094.42	727.825	505.473	0	733.365	599.031	0	0	494.598	479.419	0	532.187	446.31	406.547	395.992	0	549.472	0	440.973	0	1250.32	0	1168.72	0	768.492	1000.62	971.818	932.754	1011.3	1085.01	991.432	1119.2	1117.78	1082	984.65
259.0/1.1 (15575)	258.98	1.12	15575	0	0	0	0	0	0	0	0	0	0	0	0	0	0	0	0	6.38305	0	0	0	0	0	11.682	0	0	0	0	0	0	0	0	0	0	0	0	0	0	0	0	0	0	0	0	0	0	0
259.0/1.5 (15580)	259.029	1.47	15580	130.202	22.9513	132.676	0	0	52.1317	0	0	11.1912	43.4821	10.1018	5.90451	76.2579	0	3.12934	37.5249	84.839	0	40.8849	8.09703	15.7097	34.6837	24.9283	44.4861	10.3353	14.3381	14.4121	94.4363	25.2027	0	0	0	0	0	0	0	0	0	0	0	0	0	0	0	0	0
259.0/1.5 (15581)	259.032	1.49	15581	0	0	0	0	47.7808	0	0	0	0	0	0	0	0	65.0084	0	0	0	17.3795	0	0	0	0	0	0	0	0	0	0	0	0	0	0	0	0	0	0	0	0	0	0	0	0	0	0	0	0
259.1/4.2 (15588)	259.081	4.17	15588	0	0	0	0	0	0	0	0	0	0	0	0	0	0	0	0	0	0	37.3992	7.52284	0	0	0	4.28325	0	7.06764	35.9693	0	0	0	0	0	0	0	0	0	0	0	0	0	0	0	0	0	0	0
259.1/4.3 (15589)	259.082	4.35	15589	0	0	0	0	0	0	0	0	0	0	0	0	0	0	0	0	0	0	0	0	22.2639	16.7089	8.07483	6.27655	13.1819	0	0	0	0	0	0	0	0	0	0	0	0	0	0	0	0	0	0	0	0	0
259.1/1.5 (15591)	259.092	1.47	15591	80.708	117.287	113.614	0	54.2521	75.0791	154.767	190.442	187.462	0	242.261	166.352	126.052	20.378	150.954	126.805	183.758	0	110.879	146.63	256.342	64.4076	295.653	232.088	190.618	135.716	134.823	147.498	36.2556	49.2092	0	0	0	0	0	0	0	0	0	0	0	0	0	0	0	0
259.1/1.0 (15592)	259.092	1.02	15592	0	0	0	0	0	7.87118	0	0	0	7.12224	6.41176	8.74095	8.53314	29.9923	0	0	7.5534	6.68505	0	0	0	0	0	20.7399	31.2496	3.81759	0	0	0	0	0	0	0	0	0	0	0	0	0	0	0	0	0	0	0	0
259.1/1.1 (15595)	259.094	1.15	15595	3.00681	0	0	0	0	3.99934	0	0	0	0	0	29.1567	0	0	13.2752	26.3617	0	0	21.5252	0	0	19.3719	0	0	1.52952	0	0	20.1479	102.725	0	0	0	0	0	0	0	0	0	0	0	0	0	0	0	0	0
259.1/1.4 (15596)	259.095	1.35	15596	0	0	0	0	4.54359	0	0	0	0	24.8822	0	0	0	0	0	0	0	95.8311	0	0	0	0	0	0	0	0	0	0	0	0	0	0	0	0	0	0	0	0	0	0	0	0	0	0	0	0
259.1/3.4 (15602)	259.104	3.4	15602	2.39622	27.6584	15.7127	0	20.1362	12.2467	5.3561	8.16252	0	0	0	0	12.9386	0	2.22584	0	17.0872	0	0	7.86663	0	0	0	17.9335	0	0	0	2.14743	0	0	0	0	0	0	0	0	0	0	0	0	0	0	0	0	0	0
259.1/4.2 (15604)	259.106	4.22	15604	0	0	0	0	0	0	0	0	0	0	0	0	0	8.05933	0	0	0	0	0	16.9903	0	0	0	0	0	26.8062	0	0	0	0	0	0	0	0	0	0	0	0	0	0	0	0	0	0	0	0
259.1/4.5 (15607)	259.107	4.53	15607	156.979	114.373	84.3079	23.4362	78.6631	78.3444	50.1866	98.4887	146.382	67.0478	103.601	113.142	57.1174	0	196.005	189.957	128.321	0	0	0	135.678	165.909	157.754	120.31	182.346	0	0	113.204	155.538	86.1967	0	0	0	0	0	0	0	0	0	0	0	0	0	0	0	0
259.1/4.4 (15609)	259.107	4.36	15609	0	0	0	0	0	0	43.7834	0	0	0	0	0	34.8787	73.504	0.685366	0	0	0	175.059	66.494	0	0	0	2.28639	0	70.0642	184.453	0	0	8.62136	0	0	0	0	0	0	0	0	0	0	0	0	0	0	0	0
259.1/1.1 (15615)	259.11	1.1	15615	42.4642	0	34.4068	0	0	0	0	0	2.97892	0	0	0	0	0	132.162	85.6472	103.682	0	52.0591	0	0	0	86.6871	6.51065	118.948	87.2745	88.6455	0	6.31058	31.6008	0	0	0	0	0	0	0	0	0	0	0	0	0	0	0	0
259.1/4.9 (15619)	259.114	4.94	15619	343.949	274.012	304.002	246.046	275.166	260.595	379.329	353.03	383.706	0	361.371	328.08	316.387	241.927	482.337	391.34	357.126	0	409.874	244.755	401.342	423.689	367.81	382.665	353.255	343.7	446.862	406.807	500.089	369.229	0	0	0	0	0	0	0	0	0.834747	0	0	1.06238	0	0	0	0
259.1/4.0 (15620)	259.114	4.04	15620	126.415	57.6554	79.635	0	23.8265	33.1297	2.4935	5.91045	18.604	3.76387	0	6.88332	2.91444	0	30.9484	119.605	86.6075	0	86.9303	21.3393	48.9731	88.1229	109.124	49.464	0	15.8756	1.81591	106.478	152.843	88.9525	0	0	0	0	0	0	0	0	0	0	0	0	0	0	0	0
259.1/11.8 (15634)	259.132	11.84	15634	0	0	0	0	0	0	0	0	0	0	0	0	0	0	0	0	0	0	33.2912	30.8956	35.6037	29.2952	11.8554	29.9979	0	15.7172	3.79062	0	0	0	0	0	0	0	0	0	0	0	0	0	0	0	0	0	0	0
259.1/11.7 (15636)	259.134	11.66	15636	0	0	0	0	0	0	0	0	0	0	0	0	0	0	0	0	0	0	11.4668	27.3163	15.7333	50.5839	10.6069	23.5207	0	0	0	0	0	0	0	0	0	0	0	0	0	0	0	0	0	0	0	0	0	0
259.2/2.9 (15643)	259.152	2.87	15643	1.87265	0	0	0	0	0	0	0	0	0	0	0	0	0	0	4.88502	0	0	0	0	0	0	12.9782	0	19.9448	0	0	0	36.1046	9.62449	0	0	0	0	0	0	0	0	0	0	0	0	0	0	0	0
259.2/3.4 (15658)	259.168	3.41	15658	0	3.67791	0	0	3.09882	4.2033	9.20596	5.57099	0	9.66207	3.56812	12.3681	12.9686	6.13989	0	23.0972	0	15.3502	0	0	0	0	0	0	0	0	0	0	0	0	0	0	0	0	0	0	0	0	0	0	0	0	0	0	0	0
259.7/14.3 (15672)	259.657	14.28	15672	51.4278	61.8971	52.9015	130.177	47.9601	57.3327	0	0	0	0	0	0	0	0	0	86.9661	86.6849	64.8033	0	0	0	0	0	0	0	0	0	107.9	147.911	92.4145	0	0	0	0	0	0	0	0	0	0	0	0	0	0	0	0
259.9/1.2 (15675)	259.948	1.21	15675	0	0	0	0	0	0	1.9051	1.20406	0	0	2.05282	0	24.7891	0	0	0	0	0	0	0	0	0	0	0	0	0	0	0	0	0	0	0	0	0	0	0	0	0	0	0	0	0	0	0	0	0
260.0/1.2 (15676)	259.956	1.21	15676	0	0	1.22002	39.1457	0	0	0	0	0	0	0	0	0	3.96052	0	0	0	0	0	0	0	0	0	0	0	0	0	0	25.988	83.602	0	0	0	0	0	0	0	0	0	0	1.12487	0	0	0	0	0
260.0/1.1 (15677)	260.017	1.09	15677	0	0	0	0	0	0	0	17.632	20.6079	0	0	0	24.3373	0	21.7444	8.97497	0	0	0	0	17.7932	0	0	19.7294	19.8135	0	27.978	0	0	0	0	0	0	0	0	0	0	0	0	0	0	0	0	0	0	0
260.1/1.9 (15704)	260.143	1.88	15704	0	0	0	9.97663	3.67787	5.42572	0	0	0	0	4.51626	0	0	0	0	3.31606	0	0	3.24584	0	0	0	0	0	1.40945	0	0	4.59286	25.4073	2.57661	0	0	0	0	0	0	0	0	0	0	0	0	0	0	0	0
260.1/4.3 (15705)	260.148	4.32	15705	0	0	0	0	0	0	0	0	0	0	0	0	0	0	0	0	11.2166	0	0	0	0	0	0	0	0	0	0	12.8596	0	18.1533	0	0	0	0	0	0	0	0	0	0	0	0	0	0	0	0
260.2/2.9 (15709)	260.16	2.87	15709	0	0	0	0	57.3384	119.295	21.0603	5.3679	0	0	0	0	0	0	0	0	24.049	0	0	1.7533	0	0	0	0	0	11.8943	0	0	0	48.0816	0	0	0	0	0	0	0	1.14872	0	0	1.80398	0	0	2.76206	0	0
260.2/1.4 (15710)	260.161	1.43	15710	193.372	147.396	635.598	845.113	323.891	484.214	23.6873	31.1176	31.2039	9.02801	22.7552	11.9889	56.5192	50.5916	99.2062	475.961	629.664	106.588	231.845	52.9853	70.8648	94.8959	73.1623	53.8825	4.26602	64.1086	70.6686	890.424	480.628	569.582	0	0	0	0	0	0	0	0	0	0	0	0	0	0	0	0
260.2/1.2 (15711)	260.161	1.17	15711	1280.46	1346.89	1320.89	764.773	1082.53	1277.86	214.5	188.743	162.704	218.393	148.882	267.315	294.875	383.682	359.388	943.578	845.522	700.387	487.889	351.02	437.66	315.039	301.223	98.6408	16.9595	218.73	124.476	2107.71	2592.1	2191.02	0	0	0	0	0	0	2.85996	3.37326	2.13699	9.30813	6.71498	10.0326	6.59773	3.79628	2.75409	0
260.2/2.8 (15723)	260.195	2.82	15723	35.784	0	0	0	29.9729	0	0	0	7.14813	0	0	6.01565	5.96288	0	21.3522	2.55699	0	0	0	0	0	0	0	0	0	0	0	0	0	0	0	0	0	0	0	0	0	0	0	0	0	0	0	0	0	0
260.2/1.1 (15724)	260.195	1.09	15724	1715.62	2122.9	2148.91	5892.83	2417.98	2599.56	485.328	387.179	399.83	439.005	461.105	552.761	604.5	775.113	645.329	1706.28	1597.95	0	389.945	467.902	572.34	382.317	403.906	220.97	39.6016	424.245	146.605	2189.84	1977.45	2533.58	0	0	0	0	0	0	0	4.31645	2.41793	7.58309	7.61927	9.28643	6.40007	4.45991	3.47387	0
260.2/2.2 (15726)	260.196	2.24	15726	0	0	0	92.941	0	7.55499	0	0	0	0	0	0	0	0	2.23623	0	0	0	0	0	0	0	0	0	0	0	0	0	0	0	0	0	0	0	0	0	0	0	0	0	0	0	0	0	0	0
260.2/3.8 (15729)	260.196	3.82	15729	0	0	0	0	12.5135	0	0	0	0	0	0	0	0	0	0	29.293	28.4819	0	0	0	8.35211	0	0	4.98799	31.6739	0	0	35.429	48.8522	30.2638	0	0	0	0	0	0	0	0	0	0	0	0	0	0	0	0
260.2/3.6 (15730)	260.196	3.6	15730	10.2381	46.0079	40.3843	137.399	29.3797	84.2887	48.7926	18.1268	49.8785	63.679	62.3081	54.7746	34.238	67.5817	145.483	0	0	4.54873	0	1.94928	0	0	0	2.93032	0	0	0	7.19821	6.44679	0	0	0	0	0	0	0	0	0	0	0	0	0	0	0	0	0
260.2/3.7 (15734)	260.197	3.72	15734	120.395	27.1555	43.3321	0	37.589	0	0	0	0	0	0	0	0	0	0	0	0	0	13.2097	9.32512	0	5.65203	6.09835	0	0	7.51137	0	0	0	0	0	0	0	0	0	0	0	0	0	0	0	0	0	0	0	0
260.2/4.5 (15735)	260.197	4.45	15735	46.2049	32.2988	18.3911	58.4246	21.7888	22.2043	4.27317	8.21839	3.31128	0	5.11346	3.47276	0	0	7.95176	6.61799	3.61985	0	0	0	0	0	2.91608	0	14.2086	5.41384	0	4.31938	8.67387	0	0	0	0	0	0	0	0	0	0	0	0	0	0	0	0	0
260.2/2.6 (15737)	260.197	2.55	15737	0	3.38074	0	0	3.17621	0	0	0	0	0	0	0	0	4.5724	0	0	0	0	0	0	0	0	0	0	0	0	0	0	0	0	0	0	0	0	0	0	0	0	0	0	0	0	0	0	0	0
260.2/1.6 (15738)	260.197	1.55	15738	0	0	0	0	0	0	13.5882	0	0	0	0	0	0	9.72486	0	0	0	0	148.35	0	0	102.246	33.3053	0	0	0	0	0	0	0	0	0	0	0	0	0	0	0	0	0	0	0	0	0	0	0
260.2/5.1 (15739)	260.197	5.06	15739	0	0	0	9.53337	12.8905	0	116.831	19.3231	20.2875	90.0595	72.0472	236.759	102.881	199.518	11.3143	0	0	5.27946	0	0	0	0	0	0	0	0	0	0	0	0	0	0	0	0	0	0	0	0	0	0	0	0	0	0	0	0
261.1/4.3 (15765)	261.068	4.35	15765	0	0	0	0	0	0	0	0	0	0	0	1.01163	2.8262	0	0	50.9533	54.4939	0	0	5.93747	7.84556	10.1791	3.24839	6.64692	16.3236	0	0	95.9763	97.6957	42.0836	0	0	0	0	0	0	0	0	0	0	0	0	0	0	0	0
261.1/3.2 (15776)	261.089	3.16	15776	0	66.2047	82.3953	0	90.4965	0	130.562	82.3039	10.1293	0	100.962	86.2579	110.679	0	0	48.4208	92.4226	0	0	93.7951	0	0	0	121.05	0	98.497	0	0	0	0	0	0	0	0	0	0	0	0	0	0	0	0	0	0	0	0
261.1/3.0 (15780)	261.09	3	15780	0	0	0	0	0	78.9526	0	0	0	0	0	0	0	77.7227	0	0	0	0	0	0	0	0	0	0	0	0	0	0	1.60439	129.025	0	0	0	0	0	0	0	0	0	0	0	0	0	0	0	0
261.1/3.7 (15778)	261.09	3.67	15778	76.3823	52.0915	75.4896	0	52.2904	0	50.2379	0	202.031	0	219.021	0	242.564	0	174.299	0	150.387	0	152.943	109.599	158.754	26.9113	201.4	235.84	176.377	0	160.64	133.701	80.6038	36.7033	0	0	0	0	0	0	0	0	0	0	0	0	0	0	0	0
261.1/3.3 (15781)	261.09	3.26	15781	24.1078	0	0	6.34938	0	0	0	0	0	0	0	0	0	0	0	0	0	0	24.1375	0	101.795	0	117.425	0	45.3389	0	24.7682	102.269	54.597	0	0	0	0	0	0	0	0	0	0	0	0	0	0	0	0	0
261.1/1.1 (15783)	261.092	1.14	15783	0	19.8669	0	0	0	0	0	0	0	17.0706	0	0	0	0	0	0	0	75.9469	0	0	0	0	0	0	0	0	0	0	0	0	0	0	0	0	0	0	0	0	0	0	0	0	0	0	0	0
261.1/10.6 (15792)	261.108	10.63	15792	24.7912	12.6853	11.9017	0	5.87246	0	24.6825	34.1017	32.6332	9.46854	57.8858	45.0482	6.44873	0	13.2435	8.80904	7.34296	14.7381	0	0	5.78215	0	10.321	2.44727	3.7886	0	0	11.2173	0	0	16.5423	76.1877	46.6513	49.7355	24.4458	21.6297	50.4083	31.9517	52.5971	31.7243	34.1154	54.1815	84.8785	52.8671	68.5591	33.3248
261.1/4.8 (15803)	261.121	4.83	15803	0	0	2.70738	0	0	0	0	0	0	0	1.74197	0	9.79752	0	20.9003	10.8322	0	0	0	0	0	0	5.80761	3.45017	0	0	5.0612	0	5.46333	0	0	0	0	0	0	0	40.0942	46.474	42.0922	30.4098	9.47263	21.5236	58.1199	19.1624	34.4684	0
261.1/3.9 (15804)	261.122	3.86	15804	797.132	0	498.328	0	0	0	0	0	0	0	0	0	40.4745	0	0	0	0	0	0	0	0	0	0	0	0	0	0	0	680.19	0	0	0	0	0	0	0	20.0643	7.21424	0	12.9151	1.27225	0	9.66409	0	0	0
261.1/4.0 (15805)	261.122	3.99	15805	0	0	15.8158	0	0	0	68.9995	0	78.352	0	0	0	0	0	607.995	394.154	141.003	71.6855	0	0	0	0	0	0	0	0	0	212.278	263.789	0	0	0	0	0	0	0	0	15.8388	0	6.28598	0	0	0	0	11.462	0
261.1/5.1 (15806)	261.122	5.08	15806	0	0	0	0	0	0	0	0	0	0	0	0	0	0	0	0	0	0	0	0	0	0	0	0	0	0	0	0	0	0	0	0	0	0	0	0	40.6605	39.572	37.3376	20.8758	5.63784	22.6704	42.0129	18.8592	29.7108	0
261.1/5.6 (15807)	261.122	5.64	15807	0	0	0	0	0	0	75.5707	71.7801	106.774	0	72.1631	46.8722	41.9432	46.8888	89.8849	0	0	0	0	0	0	0	2.15337	0	2.04711	0	2.14553	0	0	0	0.633043	0	0	0	0	0	1.21781	12.5675	7.50941	3.78824	0	5.34257	0	1.95115	2.98205	0
261.1/3.8 (15811)	261.125	3.83	15811	0	0	0	0	404.393	401.426	0	37.9283	0	0	0	0	0	0	874.624	0	0	0	0	0	0	0	0	131.293	0	0	0	502.779	0	385.155	0	0	0	0	0	0	0	0	0	0	0	0	6.4672	0	0	0
261.1/3.7 (15815)	261.128	3.68	15815	0	0	0	0	0	0	0	0	0	0	0	0	0	0	0	0	0	0	0	0	0	0	0	0	0	0	1093.29	238.576	0	0	5.18891	7.61535	0	1.08133	8.12912	6.75606	3.45843	7.26934	8.62437	0	0	0	0	5.60466	9.68174	2.98847
261.1/3.8 (15816)	261.13	3.79	15816	0	458.861	0	0	0	0	0	0	0	0	713.907	679.432	0	0	0	0	0	626.87	0	0	0	0	0	0	0	0	0	0	0	0	0	0	0	0	0	0	0	0	0	0	0	0	0	0	0	0
261.1/3.9 (15818)	261.132	3.92	15818	0	0	0	0	0	0	0	0	0	0	0	0	0	0	0	710.311	0	0	0	0	0	932.93	0	0	0	0	0	0	0	0	0	0	0	0	0	0	0	0	2.5451	0	0	0	0	0	0	0
261.1/3.8 (15819)	261.134	3.76	15819	0	0	0	0	0	0	0	0	747.532	577.55	0	0	0	650.375	0	0	0	0	956.378	0	0	0	0	0	898.522	0	0	0	0	0	0	0	2.03058	8.52861	0	0	0	0	0	0	0	0	0	0	0	0
261.1/3.6 (15820)	261.138	3.61	15820	0	186.678	159.665	0	0	101.435	245.539	0	0	317.095	244.144	312.126	252.21	228.181	0	0	0	0	0	0	0	0	0	0	0	0	17.2298	0	0	0	0	0	0	0	0	0	0	0	0	3.67174	0	0	0	0	0	0
261.1/1.9 (15825)	261.143	1.94	15825	0	0	0	0	0	0	0	0	0	0	0	0	17.9587	0	0	0	0	0	0	0	0	0	26.4221	0	0	0	0	0	0	274.28	0	0	0	0	0	0	0	0	0	0	0	0	0	0	0	0
261.1/3.7 (15824)	261.143	3.67	15824	0	0	0	0	0	0	0	0	0	0	0	0	0	0	386.839	197.3	211.51	0	262.649	444.402	1310.22	777.755	1465.81	1064.27	545.87	656.858	0	0	21.144	49.0574	0	0	0	0	0	0	0	0	0	0	0	0	0	0	0	0
261.1/3.1 (15826)	261.143	3.05	15826	0	564.614	186.77	0	0	0	0	0	131.834	0	87.5829	152.723	182.277	0	0	0	41.9493	0	0	50.7723	0	0	0	846.719	0	573.421	0	0	0	0	0	0	0	0	0	0	0	0	0	0	0	0	0	0	0	0
261.1/2.8 (15827)	261.143	2.79	15827	0	28.8492	0	107.929	16.702	235.471	0	0	0	0	76.2775	96.6082	0	28.6683	0	0	12.537	0	208.005	0	0	0	0	0	33.9329	464.6	0	0	0	0	0	0	0	0	0	0	0	0	0	0	0	0	0	0	0	0
261.1/3.9 (15828)	261.144	3.88	15828	126.472	0	0	0	0	0	0	0	0	0	0	0	0	0	0	0	0	0	0	0	698.688	0	890.075	907.259	0	0	0	0	0	0	0	0	0	0	0	0	0	0	0	0	0	0	0	0	0	0
261.1/1.8 (15829)	261.144	1.76	15829	21.8558	36.01	271.361	73.4201	109.61	397.9	0	0	0	0	0	0	0	0	0	52.6652	150.309	0	170.613	9.64775	104.325	49.0106	386.793	15.0893	0	8.67642	0	332.489	113.852	836.378	0	0	0	0	0	0	0	0	0	0	0	0	0	0	0	0
261.1/2.3 (15831)	261.144	2.27	15831	0	0	0	0	0	0	0	0	0	0	0	0	0	0	0	60.2871	0	0	0	0	0	0	0	0	3.31251	0	0	0	465.67	0	0	0	0	0	0	0	0	0	0	0	0	0	0	0	0	0
261.1/2.6 (15830)	261.144	2.62	15830	469.606	0	5.35024	17.4055	0	0	3.67604	0	0	0	0	0	0	0	159.287	0	0	0	0	0	0	0	7.32609	0	0	0	166.226	0	0	0	0	0	0	0	0	0	0	0	0	0	0	0	0	0	0	0
261.1/1.5 (15832)	261.144	1.52	15832	1265.66	0	0	119.889	0	0	0	0	0	0	0	0	24.387	20.1155	247.921	0	0	0	0	4.28606	0	14.3909	0	7.94476	2.0337	0	243.869	0	0	0	0	0	0	0.623597	0	0	0	0	0	0	0	0	0	0	0	0
261.1/3.4 (15833)	261.144	3.4	15833	253.576	0	0	0	0	0	0	0	26.1044	0	0	0	0	0	0	347.493	105.829	0	375.119	0	313.943	1263.09	675.478	115.976	424.284	0	667.295	85.2092	161.266	0	0	0	0	0	0	0	0	0	0	0	0	0	0	0	0	0
261.1/2.9 (15834)	261.144	2.94	15834	40.588	0	0	0	301.783	0	117.191	89.9722	33.3981	24.4921	0	0	98.0693	394.051	0	257.418	340.039	0	0	539.009	8.82593	0	126.505	0	26.2407	0	0	224.973	0	426.788	0	0	0.737334	0	0	0	0	0	0	0	0	0	0	0	0	0
261.1/3.2 (15835)	261.144	3.19	15835	563.583	38.8968	360.986	0	351.31	0	121.283	0	0	317.817	0	62.5294	0	81.4915	334.223	1028.32	613.214	0	961.796	0	1245.77	30.0109	1806.86	0	886.295	0	611.812	919.67	715.797	574.913	0	0	0	0	0	0	0	0	0	0	0	0	0	0.352472	0	0.20532
261.1/1.6 (15836)	261.144	1.65	15836	0	750.773	821.725	0	626.53	728.051	116.204	72.104	98.3754	108.828	113.074	192.766	185.036	253.585	0	1212.22	1100.26	0	581.713	222.241	389.368	407.953	0	281.978	261.826	240.093	0	1701.93	838.161	0	0	0	0	0	0	0	0	0	0	0	0	0	0	0	0	0
261.1/1.2 (15838)	261.145	1.17	15838	1513.39	1482.68	1590.25	2536.56	1632.81	1772.9	283.115	185.99	193.024	306.53	217.081	400.166	358.667	538.068	431.977	1697.2	1618.54	1532.45	701.624	711.619	721.537	578.646	591.361	362.004	411.44	527.535	291.25	2309.43	2968.78	3054.1	0	0	0	0	0	0	6.96745	8.77091	9.45389	2.78782	3.32641	7.42467	0	3.28401	2.05891	0.574899
261.1/2.8 (15840)	261.147	2.78	15840	0	28.8904	0	24.5153	0	0	0	0	0	22.7251	0	4.5541	0	0	0	0	0	209.866	0	0	0	0	0	0	0	0	0	0	0	0	0	0	0	0	0	0	0	0	0	0	0	0	0	0	0	0
261.2/8.0 (15845)	261.158	8.01	15845	37.028	0	12.6039	8.5157	14.8458	12.5775	15.7704	15.2379	20.7912	0	7.94048	19.8199	10.667	0	23.7513	24.7081	15.7922	0	14.4224	6.1057	6.60129	16.3014	6.67336	10.9629	11.7889	6.32271	21.5502	16.4668	26.5837	11.3009	0	0	0	0	0	0	0	0	0	0	0	0	0	0	0	0
261.2/8.3 (15846)	261.16	8.29	15846	1019.99	483.84	424.103	487.797	458.064	453.032	275.307	278.335	357.422	411.109	335.798	294.214	327.622	249.529	495.403	690.272	484.749	0	99.1686	52.8231	70.2678	111.323	99.7807	75.5008	112.624	59.6436	112.186	617.892	793.168	491.96	0	0	0	0	0	0	0	0	0	0	0	0	0	0	0	0
261.7/4.0 (15871)	261.656	4	15871	0	0	0	5.23686	0	0	0	0	0	0	0	0	0	0	0	0	0	0	0	0	0	0	0	0	0	0	0	1.22491	3.02207	0	0	0	0	0	0	0	0	0	0	0	0	0	0	0	0	0
262.0/1.2 (15875)	261.965	1.22	15875	0	0	0	0	0	0	5.04779	7.47055	7.58372	0	4.10662	4.93893	0	0	0	0	0	0	0	0	0	0	0	0	0	0	0	0	0	0	0	0	0	0	0	0	0	0	0	0	0	0	0	0	0	0
262.1/4.0 (15885)	262.093	4.02	15885	0	0	0	0	0	0	51.1576	42.7643	46.8447	0	38.5657	36.4924	0	0	88.7254	0	0	0	0	0	0	0	0	0	0	0	0	0	0	0	0	0	0	0	0	0	0	0	0	0	0	0	0	0	0	0
262.1/5.1 (15888)	262.097	5.08	15888	112.607	92.7397	63.0269	175.644	82.0027	87.02	0	0	0	0	0	0	0	0	0	143.614	96.3879	0	0	0	0	0	0	0	0	0	0	144.585	171.644	115.394	0	0	0	0	0	0	0	0	0	0	0	0	0	0	0	0
262.1/3.9 (15900)	262.116	3.9	15900	7.09969	0	0	0	0	64.7237	0	48.4393	0	0	0	0	0	0	0	0	0	0	0	0	22.5618	0	0	0	0	0	0	0	0	0	0	0	0	0	0	0	0	0	0	0	0	0	0	0	0	0
262.1/3.3 (15901)	262.117	3.27	15901	0	8.59362	0	253.213	0	60.0116	0	0	0	0	0	0	0	0	0	0	0	0	0	10.038	0	0	0	0	0	11.1887	0	0	0	49.6867	0	0	0	0	0	0	0	0	0	0	0	0	0	0	0	0
262.1/3.4 (15903)	262.118	3.45	15903	201.196	92.8268	163.61	0	212.853	98.3595	85.6637	80.8779	0	51.4097	67.1156	84.144	101.757	96.2922	0	18.9506	96.8608	130.873	10.133	75.333	10.0306	0	0	0	0	58.6396	0	209.444	42.0051	42.0086	0	0	0	0	0	0	0	0	0	0	0	0	0	0	0	0
262.1/3.7 (15907)	262.122	3.73	15907	0	99.1577	0	99.1356	108.078	114.021	164.83	0	9.25257	158.513	157.387	0	0	96.9091	0	0	0	178.995	0	0	0	0	0	0	0	0	0	0	0	0	0	0	0	0	0	0	0	0	0	1.22167	0	0	0	0	0	0
262.2/4.3 (15936)	262.163	4.35	15936	0	0	0	0	0	0	1.08528	0	24.1318	0	22.5273	0	0	0	0	0	0	0	0	0	0	0	0	0	0	0	0	0	0	0	0	0	0	0	0	0	0	0	0	0	0	0	0	0	0	0
262.9/1.3 (15955)	262.886	1.26	15955	0	0	0	33.4995	0	0	0	15.5042	0	0	32.831	0	0	0	0	0	0	0	0	0	0	0	0	0	0	0	0	0	0	0	0	0	0	0	0	0	0	0	0	0	0	0	0	0	0	0
263.1/5.7 (15969)	263.082	5.66	15969	0	0	0	0	0	0	166.084	146.797	167.837	183.498	156.431	125.075	151.69	170.441	154.887	0	0	0	0	173.702	170.063	234.228	192.51	191.37	180.737	179.334	0	0	0	0	0	0	0	0	0	0	0	1.06781	1.25219	0	0	0	0	0	0	0
263.1/3.5 (15977)	263.098	3.48	15977	0	0	0	0	0.6723	0	0.0572457	0	0	0	0	0	0	0	0	0	0	0	0	1.85386	0	0	0	0	0	0	0	0	0	4.86477	0	0	0	0	0	0	0	0	0	0	0	0	0	0	0	0
263.1/2.7 (15979)	263.099	2.71	15979	0	0	0	0	0	0	0	0	0	0	0	7.09982	0	0	0	0	0	0	0	3.19986	0	0	0	8.37614	2.537	4.90497	0	0	0	0	0	0	0	0	0	0	0	0	0	0	0	0	0	0	0	0
263.1/1.1 (15980)	263.099	1.1	15980	0	0	0	12.6164	0	0	19.0779	0	0	20.1302	20.6773	0	0	0	0	0	0	0	0	0	0	0	0	0	0	0	0	0	0	0	0	0	0	0	0	0	0	0	0	0	0	0	0	0	0	0
263.1/4.4 (15986)	263.101	4.4	15986	147.891	44.0594	0	0	43.6327	0	99.6297	95.2515	90.8989	0	88.3019	63.268	63.233	0	210.643	0	0	0	96.2309	53.0941	82.6069	51.8927	76.5957	83.0997	149.669	78.5779	0	0	0	29.0835	0	0	0	0	0	0	0	0.980846	0	0.991063	0.313715	0	0	0	0	0
[truncated: 13,018 more rows]
[truncated: 15 more columns]
