# Supplementary material for: Metabolomics Reveals the Heterogeneous Secretome of Two Entomopathogenic Fungi to Ex Vivo Cultured Insect Tissues
Source: PLoS One. 2013 Aug 5;8(8):e70609. doi: 10.1371/journal.pone.0070609 (PMC3734240; doi:10.1371/journal.pone.0070609)
Supplement: Data File S2 — (XLSX) [file pone.0070609.s004.xlsx]

## Sheet: Beauveria live ions p<0.01
Sheet 1: Ion peaks significantly higher (p<0.01) in B. bassiana samples. Yellow markings indicate beauverolides
Peak name	M/z	Ret. Time	t-value	p-value	mean1	mean2	median1	median2	sigma1	sigma2	Delta	Fold Change	Log(Fold Change)
473.3/6.9 (44148)	473.276	6.94	27.7181	6.7129e-22	415.673	0	393.721	0	70.4195	0	415.673	Infinity	Infinity
511.8/7.4 (49462)	511.82	7.38	24.8379	1.29e-20	150.395	0	154.499	0	28.4329	0	150.395	Infinity	Infinity
598.0/8.1 (59706)	597.985	8.13	22.5527	1.6989e-19	157.822	0	168.223	0	32.8604	0	157.822	Infinity	Infinity
463.1/7.5 (42701)	463.116	7.46	21.3084	7.6482e-19	69.5357	0	72.7083	0	15.3236	0	69.5357	Infinity	Infinity
594.2/5.4 (59313)	594.222	5.45	21.1324	9.5206e-19	748.337	0	787.123	0	166.285	0	748.337	Infinity	Infinity
718.9/8.4 (69883)	718.926	8.4	21.1029	9.8792e-19	112.83	0	114.772	0	25.1065	0	112.83	Infinity	Infinity
463.1/6.5 (42698)	463.112	6.53	20.874	1.3172e-18	47.2683	0	44.2241	0	10.6333	0	47.2683	Infinity	Infinity
718.4/8.4 (69850)	718.425	8.37	20.4187	2.3542e-18	135.811	0	132.261	0	31.2328	0	135.811	Infinity	Infinity
634.3/1.1 (63360)	634.344	1.12	20.4024	2.4042e-18	186.329	0	181.347	0	42.8847	0	186.329	Infinity	Infinity
616.9/8.8 (61728)	616.889	8.83	20.3653	2.522e-18	57.9422	0	56.7938	0	13.3601	0	57.9422	Infinity	Infinity
428.3/1.0 (37790)	428.311	1.04	20.0187	3.9583e-18	1271.93	0	1309.53	0	298.354	0	1271.93	Infinity	Infinity
669.9/8.1 (66380)	669.899	8.12	19.347	9.6718e-18	109.546	0	106.62	0	26.5881	0	109.546	Infinity	Infinity
181.1/5.0 (10096)	181.133	4.99	18.3796	3.6745e-17	169.963	0	169.338	0	43.4232	0	169.963	Infinity	Infinity
567.5/5.9 (56439)	567.496	5.91	18.3562	3.7979e-17	45.9936	0	49.4883	0	11.7657	0	45.9936	Infinity	Infinity
130.1/6.6 (7101)	130.122	6.58	18.2323	4.5267e-17	26.9931	0	26.1376	0	6.95211	0	26.9931	Infinity	Infinity
554.3/14.0 (54879)	554.299	14	18.2059	4.6995e-17	1133.6	0	1082.22	0	292.381	0	1133.6	Infinity	Infinity
378.2/7.9 (30796)	378.241	7.87	17.8984	7.3012e-17	72.3749	0	69.176	0	18.988	0	72.3749	Infinity	Infinity
750.9/8.1 (71846)	750.924	8.13	17.7325	9.2835e-17	68.5787	0	69.097	0	18.1603	0	68.5787	Infinity	Infinity
538.3/13.6 (52842)	538.271	13.61	17.5876	1.147e-16	569.76	0	544.908	0	152.121	0	569.76	Infinity	Infinity
675.4/6.4 (66763)	675.392	6.39	17.11	2.3268e-16	49.9405	0	48.2897	0	13.7059	0	49.9405	Infinity	Infinity
522.3/13.6 (50853)	522.298	13.61	16.5325	5.5965e-16	1081.29	0	1014.32	0	307.119	0	1081.29	Infinity	Infinity
506.3/1.1 (48667)	506.3	1.11	16.5051	5.8386e-16	296.937	0	307.337	0	84.4794	0	296.937	Infinity	Infinity
708.6/5.9 (69232)	708.615	5.92	16.2028	9.3429e-16	23.6529	0	22.3997	0	6.85485	0	23.6529	Infinity	Infinity
463.1/6.8 (42703)	463.117	6.84	15.9062	1.4922e-15	550.772	0	527.22	0	162.595	0	550.772	Infinity	Infinity
504.8/6.6 (48455)	504.79	6.56	15.2384	4.3973e-15	79.1164	0	70.8481	0	24.3799	0	79.1164	Infinity	Infinity
516.3/12.6 (50095)	516.312	12.58	15.2108	4.6015e-15	77.1831	0	79.2364	0	23.8272	0	77.1831	Infinity	Infinity
500.3/13.6 (47909)	500.316	13.61	15.2094	4.6123e-15	1043.22	0	965.592	0	322.083	0	1043.22	Infinity	Infinity
585.3/6.3 (58390)	585.324	6.31	14.9	7.7139e-15	53.1515	0	49.457	0	16.7507	0	53.1515	Infinity	Infinity
616.0/8.1 (61603)	615.957	8.13	14.598	1.2848e-14	19.3825	0	18.4736	0	6.23478	0	19.3825	Infinity	Infinity
580.3/13.5 (57896)	580.338	13.52	14.2298	2.4197e-14	104.239	0	109.322	0	34.3983	0	104.239	Infinity	Infinity
382.2/5.8 (31326)	382.219	5.76	14.1043	3.0114e-14	31.0039	0	33.9122	0	10.3221	0	31.0039	Infinity	Infinity
440.5/13.0 (39537)	440.457	12.96	13.8318	4.866e-14	70.2838	0	60.4131	0	23.8605	0	70.2838	Infinity	Infinity
737.9/5.9 (71086)	737.926	5.89	13.7083	6.063e-14	347.026	0	307.562	0	118.873	0	347.026	Infinity	Infinity
467.3/7.2 (43314)	467.284	7.22	13.6918	6.245e-14	34.2215	0	30.9429	0	11.7366	0	34.2215	Infinity	Infinity
488.3/13.5 (46290)	488.311	13.54	13.6531	6.6919e-14	76.7641	0	77.587	0	26.4016	0	76.7641	Infinity	Infinity
482.4/14.0 (45382)	482.359	14	13.1746	1.5956e-13	211.648	0	192.626	0	75.4368	0	211.648	Infinity	Infinity
676.3/4.3 (66798)	676.28	4.34	13.17	1.6091e-13	225.011	0	246.577	0	80.2272	0	225.011	Infinity	Infinity
400.1/7.6 (33747)	400.113	7.63	12.8662	2.8279e-13	66.2829	0	64.8222	0	24.1911	0	66.2829	Infinity	Infinity
572.3/7.4 (56970)	572.343	7.4	12.4124	6.6847e-13	924.391	0	966.72	0	349.706	0	924.391	Infinity	Infinity
514.3/7.5 (49792)	514.303	7.5	12.4093	6.7255e-13	34.2519	0	34.7434	0	12.9611	0	34.2519	Infinity	Infinity
322.2/5.8 (21912)	322.177	5.81	12.165	1.0786e-12	66.2355	0	57.9327	0	25.5671	0	66.2355	Infinity	Infinity
575.3/12.4 (57338)	575.345	12.44	12.1416	1.1289e-12	128.55	0	117.768	0	49.7163	0	128.55	Infinity	Infinity
700.4/7.7 (68600)	700.402	7.68	12.1023	1.2191e-12	150.943	0	142.572	0	58.5668	0	150.943	Infinity	Infinity
602.3/13.5 (60226)	602.32	13.53	12.0869	1.2563e-12	164.388	0	150.874	0	63.8646	0	164.388	Infinity	Infinity
570.3/13.9 (56719)	570.298	13.88	11.784	2.2839e-12	154.609	0	133.058	0	61.6095	0	154.609	Infinity	Infinity
463.1/6.1 (42699)	463.115	6.12	11.7611	2.3903e-12	82.6476	0	70.6416	0	32.9978	0	82.6476	Infinity	Infinity
280.1/5.9 (17548)	280.067	5.89	11.5513	3.6406e-12	129.345	0	125.409	0	52.5803	0	129.345	Infinity	Infinity
526.3/13.5 (51357)	526.268	13.53	11.5494	3.6547e-12	47.959	0	53.0918	0	19.4991	0	47.959	Infinity	Infinity
180.1/5.5 (10042)	180.101	5.46	11.4865	4.1501e-12	31.0816	0	34.1291	0	12.7063	0	31.0816	Infinity	Infinity
611.3/13.8 (61163)	611.321	13.8	11.3894	5.0548e-12	84.2827	0	63.7229	0	34.749	0	84.2827	Infinity	Infinity
610.6/8.1 (61081)	610.632	8.13	11.389	5.0588e-12	57.5727	0	58.6539	0	23.7375	0	57.5727	Infinity	Infinity
538.3/12.6 (52855)	538.294	12.59	11.3069	5.9819e-12	121.981	0	128.661	0	50.6585	0	121.981	Infinity	Infinity
602.3/14.3 (60207)	602.299	14.25	11.2864	6.2388e-12	185.142	0	163.988	0	77.029	0	185.142	Infinity	Infinity
773.4/6.1 (73102)	773.442	6.14	11.1222	8.7459e-12	252.136	0	252.525	0	106.45	0	252.136	Infinity	Infinity
482.3/7.7 (45354)	482.284	7.7	11.0686	9.7745e-12	127.891	0	120.667	0	54.2567	0	127.891	Infinity	Infinity
273.1/6.5 (16856)	273.098	6.54	11.0635	9.8785e-12	40.8529	0	47.0261	0	17.3395	0	40.8529	Infinity	Infinity
641.3/14.0 (63907)	641.311	14.02	10.954	1.2406e-11	412.167	0	370.489	0	176.687	0	412.167	Infinity	Infinity
611.0/8.2 (61098)	610.966	8.15	10.772	1.818e-11	47.6826	0	48.3888	0	20.7858	0	47.6826	Infinity	Infinity
567.2/6.0 (56354)	567.169	5.99	10.7054	2.0929e-11	111.22	0	105.961	0	48.7848	0	111.22	Infinity	Infinity
374.2/4.7 (30267)	374.217	4.65	10.6287	2.4631e-11	325.993	0	284.462	0	144.023	0	325.993	Infinity	Infinity
341.7/6.6 (25195)	341.692	6.56	10.6008	2.6139e-11	72.7377	0	65.0046	0	32.2199	0	72.7377	Infinity	Infinity
468.5/13.3 (43473)	468.493	13.26	10.4953	3.2759e-11	76.8966	0	77.5487	0	34.4047	0	76.8966	Infinity	Infinity
747.4/4.7 (71656)	747.424	4.65	10.4801	3.3845e-11	1036.74	0	918.501	0	464.525	0	1036.74	Infinity	Infinity
644.0/6.0 (64135)	643.997	6.05	10.4175	3.8721e-11	12.2762	0	11.7622	0	5.53356	0	12.2762	Infinity	Infinity
566.4/15.0 (56318)	566.357	15.03	10.3565	4.4169e-11	736.308	0	575.824	0	333.85	0	736.308	Infinity	Infinity
308.1/3.6 (20264)	308.079	3.56	10.327	4.7082e-11	45.6055	0	47.2719	0	20.7371	0	45.6055	Infinity	Infinity
553.3/6.6 (54767)	553.334	6.63	10.3173	4.8083e-11	4361.28	0	4080.69	0	1984.96	0	4361.28	Infinity	Infinity
633.3/1.1 (63283)	633.346	1.14	10.315	4.8324e-11	197.205	0	193.965	0	89.7746	0	197.205	Infinity	Infinity
227.1/4.9 (13008)	227.138	4.95	10.2386	5.7049e-11	142.409	0	150.515	0	65.3136	0	142.409	Infinity	Infinity
146.0/1.0 (7955)	146.027	1	10.1191	7.4061e-11	10.8385	0	10.6767	0	5.02957	0	10.8385	Infinity	Infinity
613.4/6.4 (61376)	613.391	6.4	10.1105	7.5478e-11	45.8328	0	51.4506	0	21.2867	0	45.8328	Infinity	Infinity
511.3/13.6 (49427)	511.301	13.57	10.0954	7.8013e-11	19.3939	0	19.8374	0	9.02082	0	19.3939	Infinity	Infinity
530.4/14.3 (51966)	530.36	14.31	10.0908	7.8807e-11	142.908	0	129.32	0	66.5019	0	142.908	Infinity	Infinity
532.3/13.3 (52197)	532.339	13.29	10.0338	8.9326e-11	60.6172	0	66.3923	0	28.3683	0	60.6172	Infinity	Infinity
586.3/14.3 (58510)	586.326	14.25	10.0325	8.9586e-11	322.103	0	255.258	0	150.761	0	322.103	Infinity	Infinity
587.3/13.7 (58632)	587.327	13.73	9.89322	1.2192e-10	109.236	0	95.2494	0	51.848	0	109.236	Infinity	Infinity
384.4/12.2 (31599)	384.394	12.25	9.87117	1.2805e-10	37.8599	0	41.9261	0	18.0101	0	37.8599	Infinity	Infinity
356.2/5.0 (27746)	356.206	4.99	9.79576	1.5148e-10	133.499	0	125.041	0	63.9948	0	133.499	Infinity	Infinity
629.3/13.9 (62948)	629.331	13.88	9.72092	1.7911e-10	93.1769	0	72.2485	0	45.0096	0	93.1769	Infinity	Infinity
625.3/14.0 (62593)	625.336	14.02	9.68853	1.9263e-10	621.661	0	519.795	0	301.301	0	621.661	Infinity	Infinity
492.3/5.9 (46808)	492.285	5.94	9.61494	2.2736e-10	71.7363	0	72.7141	0	35.0346	0	71.7363	Infinity	Infinity
453.3/12.8 (41378)	453.348	12.79	9.49465	2.9857e-10	57.6097	0	58.7484	0	28.4919	0	57.6097	Infinity	Infinity
170.1/6.0 (9457)	170.116	6.02	9.49271	2.9989e-10	12.6758	0	12.7956	0	6.27032	0	12.6758	Infinity	Infinity
328.1/4.5 (22752)	328.114	4.53	9.48421	3.0574e-10	56.3078	0	60.5317	0	27.8787	0	56.3078	Infinity	Infinity
617.3/5.6 (61799)	617.35	5.58	9.48037	3.0843e-10	119.692	0	100.443	0	59.2849	0	119.692	Infinity	Infinity
480.8/4.7 (45098)	480.779	4.68	9.41916	3.546e-10	228.454	0	213.189	0	113.891	0	228.454	Infinity	Infinity
358.2/12.4 (28056)	358.238	12.37	9.36628	4.0017e-10	153.795	0	126.946	0	77.1043	0	153.795	Infinity	Infinity
520.3/13.5 (50623)	520.336	13.53	9.26976	4.9945e-10	32.9067	0	32.4696	0	16.6694	0	32.9067	Infinity	Infinity
561.3/12.4 (55781)	561.329	12.37	9.21747	5.6344e-10	2805.98	0	2293.31	0	1429.48	0	2805.98	Infinity	Infinity
486.3/13.4 (45989)	486.301	13.35	9.0592	8.1341e-10	34.5116	0	38.0744	0	17.8887	0	34.5116	Infinity	Infinity
386.9/4.2 (31955)	386.909	4.16	9.04212	8.4645e-10	663.48	0	600.34	0	344.557	0	663.48	Infinity	Infinity
544.8/4.6 (53651)	544.809	4.64	9.03074	8.6922e-10	203.646	0	153.471	0	105.89	0	203.646	Infinity	Infinity
689.6/5.3 (67850)	689.558	5.25	9.0211	8.8901e-10	193.52	0	187.163	0	100.732	0	193.52	Infinity	Infinity
168.0/1.2 (9348)	168.03	1.18	8.95625	1.0347e-09	5039.06	0	5649	0	2641.97	0	5039.06	Infinity	Infinity
386.5/3.1 (31915)	386.503	3.08	8.94855	1.0535e-09	31.2138	0	30.035	0	16.3794	0	31.2138	Infinity	Infinity
669.3/15.0 (66347)	669.342	15.03	8.9263	1.11e-09	235.987	0	171.647	0	124.142	0	235.987	Infinity	Infinity
608.8/8.0 (60864)	608.845	8.02	8.92572	1.1115e-09	301.418	0	267.228	0	158.573	0	301.418	Infinity	Infinity
190.0/1.2 (10592)	190.012	1.17	8.92183	1.1217e-09	1967.98	0	1974.27	0	1035.79	0	1967.98	Infinity	Infinity
596.3/5.0 (59553)	596.34	5	8.88934	1.2107e-09	74.1112	0	69.6704	0	39.1488	0	74.1112	Infinity	Infinity
613.4/6.9 (61360)	613.355	6.92	8.80462	1.4784e-09	108.045	0	105.648	0	57.6234	0	108.045	Infinity	Infinity
447.3/12.4 (40553)	447.286	12.44	8.78529	1.5476e-09	72.4752	0	71.1967	0	38.7381	0	72.4752	Infinity	Infinity
496.3/5.8 (47362)	496.316	5.82	8.76179	1.6362e-09	66.3224	0	47.8086	0	35.5445	0	66.3224	Infinity	Infinity
122.0/1.2 (6671)	122.024	1.18	8.75467	1.664e-09	1149.47	0	1322.13	0	616.539	0	1149.47	Infinity	Infinity
646.9/5.9 (64405)	646.939	5.88	8.73567	1.7407e-09	95.2983	0	124.278	0	51.2263	0	95.2983	Infinity	Infinity
626.4/7.6 (62695)	626.39	7.55	8.7261	1.7807e-09	32.4158	0	33.6569	0	17.4438	0	32.4158	Infinity	Infinity
268.1/4.6 (16458)	268.081	4.58	8.67671	2.0025e-09	157.737	0	159.237	0	85.3657	0	157.737	Infinity	Infinity
409.2/2.9 (35038)	409.248	2.93	8.65143	2.1269e-09	78.6426	0	68.4497	0	42.6849	0	78.6426	Infinity	Infinity
625.3/13.7 (62569)	625.282	13.74	8.63835	2.1943e-09	98.4491	0	86.1858	0	53.5162	0	98.4491	Infinity	Infinity
389.2/3.3 (32302)	389.201	3.35	8.60967	2.3498e-09	423.019	0	483.402	0	230.716	0	423.019	Infinity	Infinity
478.3/2.8 (44762)	478.268	2.85	8.59918	2.4095e-09	59.1244	0	53.3929	0	32.286	0	59.1244	Infinity	Infinity
326.2/6.6 (22451)	326.209	6.59	8.58518	2.4915e-09	72.9038	0	63.4775	0	39.8754	0	72.9038	Infinity	Infinity
585.4/7.9 (58413)	585.396	7.87	8.57423	2.5577e-09	50.0331	0	51.4605	0	27.401	0	50.0331	Infinity	Infinity
570.3/13.3 (56715)	570.293	13.27	8.54366	2.7521e-09	48.6835	0	51.9921	0	26.7573	0	48.6835	Infinity	Infinity
653.4/15.0 (64936)	653.368	15.02	8.52298	2.8921e-09	380.885	0	272.972	0	209.849	0	380.885	Infinity	Infinity
575.3/6.6 (57328)	575.32	6.6	8.52267	2.8943e-09	209.018	0	245.44	0	115.163	0	209.018	Infinity	Infinity
619.3/4.6 (62012)	619.327	4.58	8.51581	2.9423e-09	63.8015	0	64.9726	0	35.1811	0	63.8015	Infinity	Infinity
554.3/13.3 (54888)	554.319	13.28	8.5035	3.0306e-09	91.1731	0	105.54	0	50.347	0	91.1731	Infinity	Infinity
255.1/5.9 (15283)	255.066	5.93	8.50263	3.037e-09	12.0608	0	11.1052	0	6.6608	0	12.0608	Infinity	Infinity
437.2/5.3 (39059)	437.212	5.33	8.43749	3.5528e-09	1490.6	0	1494.24	0	829.571	0	1490.6	Infinity	Infinity
618.3/13.5 (61882)	618.292	13.54	8.42334	3.6761e-09	89.0038	0	91.3183	0	49.6168	0	89.0038	Infinity	Infinity
206.0/1.2 (11609)	205.983	1.19	8.41498	3.7511e-09	127.633	0	126.877	0	71.2219	0	127.633	Infinity	Infinity
544.4/15.0 (53620)	544.375	15.04	8.39655	3.9219e-09	635.32	0	505.161	0	355.301	0	635.32	Infinity	Infinity
683.5/5.7 (67399)	683.474	5.65	8.39588	3.9283e-09	99.188	0	85.3219	0	55.475	0	99.188	Infinity	Infinity
286.2/4.5 (18246)	286.2	4.51	8.36363	4.2471e-09	208.098	0	198.122	0	116.836	0	208.098	Infinity	Infinity
257.1/9.4 (15436)	257.103	9.4	8.35277	4.3604e-09	80.8419	0	103.137	0	45.4476	0	80.8419	Infinity	Infinity
648.3/8.4 (64503)	648.307	8.4	8.31975	4.724e-09	14.6604	0	15.7551	0	8.27449	0	14.6604	Infinity	Infinity
401.3/6.8 (33994)	401.274	6.8	8.31493	4.7796e-09	65.8495	0	54.9982	0	37.1876	0	65.8495	Infinity	Infinity
634.3/6.3 (63340)	634.309	6.28	8.29743	4.9872e-09	24.759	0	27.6531	0	14.0118	0	24.759	Infinity	Infinity
357.1/5.2 (27825)	357.087	5.15	8.26107	5.4485e-09	260.682	0	273.195	0	148.176	0	260.682	Infinity	Infinity
186.1/3.6 (10351)	186.075	3.61	8.2434	5.6882e-09	26.8979	0	21.4401	0	15.322	0	26.8979	Infinity	Infinity
288.0/2.2 (18357)	287.967	2.22	8.1861	6.5424e-09	48.7547	0	45.2166	0	27.9669	0	48.7547	Infinity	Infinity
329.2/2.8 (22992)	329.216	2.85	8.17766	6.6787e-09	5.78032	0	5.81968	0	3.31915	0	5.78032	Infinity	Infinity
504.3/12.4 (48419)	504.307	12.43	8.14539	7.2279e-09	31.3543	0	24.6209	0	18.0755	0	31.3543	Infinity	Infinity
630.3/15.4 (63027)	630.331	15.42	8.13133	7.4813e-09	154.417	0	103.644	0	89.1738	0	154.417	Infinity	Infinity
538.2/4.2 (52800)	538.172	4.24	8.13041	7.4983e-09	85.6291	0	81.4005	0	49.4554	0	85.6291	Infinity	Infinity
795.2/4.3 (74199)	795.21	4.3	8.12587	7.5822e-09	626.978	0	490.672	0	362.315	0	626.978	Infinity	Infinity
281.2/12.4 (17722)	281.168	12.37	8.11008	7.8818e-09	244.601	0	224.333	0	141.624	0	244.601	Infinity	Infinity
571.4/4.5 (56881)	571.393	4.51	8.08718	8.3379e-09	498.759	0	481.898	0	289.6	0	498.759	Infinity	Infinity
500.4/4.5 (47913)	500.355	4.51	8.08067	8.4725e-09	67.3793	0	64.4406	0	39.1546	0	67.3793	Infinity	Infinity
568.2/3.9 (56474)	568.184	3.95	8.02075	9.8196e-09	72.1866	0	76.4887	0	42.2616	0	72.1866	Infinity	Infinity
627.3/13.8 (62758)	627.293	13.8	8.01518	9.9555e-09	39.6659	0	30.6002	0	23.2385	0	39.6659	Infinity	Infinity
387.3/4.5 (32068)	387.272	4.51	8.01432	9.9768e-09	238.244	0	232.351	0	139.592	0	238.244	Infinity	Infinity
105.1/6.9 (5880)	105.07	6.88	7.90309	1.3138e-08	82.0683	0	97.5719	0	48.7621	0	82.0683	Infinity	Infinity
475.2/5.2 (44342)	475.172	5.24	7.86798	1.4336e-08	404.538	0	447.351	0	241.435	0	404.538	Infinity	Infinity
673.4/7.9 (66633)	673.363	7.9	7.83842	1.5429e-08	31.3202	0	33.1974	0	18.7629	0	31.3202	Infinity	Infinity
348.1/4.3 (26217)	348.05	4.28	7.8299	1.5761e-08	46.326	0	39.2897	0	27.7826	0	46.326	Infinity	Infinity
465.1/6.1 (42955)	465.113	6.09	7.82521	1.5946e-08	29.0219	0	25.0571	0	17.4154	0	29.0219	Infinity	Infinity
645.4/7.6 (64303)	645.394	7.57	7.77989	1.7854e-08	16.5168	0	17.0278	0	9.96909	0	16.5168	Infinity	Infinity
567.3/5.9 (56412)	567.297	5.85	7.76054	1.8739e-08	51.4965	0	49.5569	0	31.1595	0	51.4965	Infinity	Infinity
390.7/4.8 (32504)	390.667	4.77	7.75857	1.8831e-08	220.286	0	183.844	0	133.324	0	220.286	Infinity	Infinity
538.3/4.5 (52831)	538.25	4.46	7.73957	1.9748e-08	71.2548	0	78.9363	0	43.2316	0	71.2548	Infinity	Infinity
550.2/4.2 (54302)	550.171	4.21	7.72533	2.0465e-08	66.5081	0	71.1914	0	40.4261	0	66.5081	Infinity	Infinity
416.2/1.1 (36077)	416.195	1.12	7.68788	2.2479e-08	460.357	0	536.298	0	281.185	0	460.357	Infinity	Infinity
548.7/4.2 (54146)	548.733	4.2	7.65672	2.4309e-08	83.2649	0	95.3757	0	51.065	0	83.2649	Infinity	Infinity
636.9/5.9 (63567)	636.873	5.93	7.63543	2.5646e-08	152.019	0	131.47	0	93.4905	0	152.019	Infinity	Infinity
466.1/1.1 (43103)	466.134	1.12	7.62202	2.6526e-08	86.8008	0	116.824	0	53.4759	0	86.8008	Infinity	Infinity
559.3/12.2 (55513)	559.316	12.19	7.6153	2.6979e-08	69.0979	0	56.8884	0	42.6071	0	69.0979	Infinity	Infinity
566.3/14.5 (56301)	566.301	14.52	7.61197	2.7206e-08	145.969	0	121.678	0	90.0469	0	145.969	Infinity	Infinity
328.1/3.9 (22749)	328.114	3.85	7.55051	3.1769e-08	171.32	0	153.406	0	106.546	0	171.32	Infinity	Infinity
607.3/13.9 (60751)	607.349	13.89	7.51892	3.441e-08	115.35	0	84.9338	0	72.0385	0	115.35	Infinity	Infinity
405.2/9.3 (34518)	405.237	9.31	7.4975	3.6329e-08	14.7447	0	15.8492	0	9.2347	0	14.7447	Infinity	Infinity
509.5/4.6 (49163)	509.534	4.64	7.47795	3.8174e-08	40.3401	0	47.5844	0	25.3314	0	40.3401	Infinity	Infinity
420.2/6.2 (36588)	420.16	6.17	7.45832	4.0122e-08	30.9048	0	38.4493	0	19.4576	0	30.9048	Infinity	Infinity
791.7/8.2 (74069)	791.707	8.23	7.43487	4.2584e-08	628.911	0	578.822	0	397.209	0	628.911	Infinity	Infinity
419.8/5.9 (36570)	419.839	5.89	7.41556	4.4726e-08	51.699	0	51.3949	0	32.7373	0	51.699	Infinity	Infinity
507.5/4.3 (48849)	507.462	4.33	7.26464	6.5744e-08	249.395	0	292.126	0	161.205	0	249.395	Infinity	Infinity
382.0/4.4 (31255)	382.01	4.37	7.21338	7.4981e-08	55.2305	0	63.5939	0	35.9538	0	55.2305	Infinity	Infinity
443.9/5.9 (40014)	443.85	5.94	7.18946	7.9732e-08	9.73925	0	9.81069	0	6.36112	0	9.73925	Infinity	Infinity
216.0/3.4 (12254)	216.049	3.44	7.17789	8.214e-08	24.657	0	26.4359	0	16.1305	0	24.657	Infinity	Infinity
132.0/4.6 (7206)	132.029	4.58	7.17687	8.2356e-08	49.6504	0	50.1769	0	32.4857	0	49.6504	Infinity	Infinity
274.2/3.1 (17064)	274.178	3.07	7.15642	8.6805e-08	66.4054	0	63.9435	0	43.5725	0	66.4054	Infinity	Infinity
747.4/4.3 (71657)	747.428	4.34	7.15369	8.7417e-08	444.225	0	503.771	0	291.593	0	444.225	Infinity	Infinity
439.3/12.7 (39384)	439.332	12.72	7.05791	1.1192e-07	24.3796	0	25.0333	0	16.2202	0	24.3796	Infinity	Infinity
571.7/5.9 (56890)	571.721	5.89	7.05243	1.1352e-07	18.0659	0	17.6572	0	12.0289	0	18.0659	Infinity	Infinity
150.0/2.3 (8267)	150.019	2.29	7.02594	1.2158e-07	384.015	0	381.389	0	256.654	0	384.015	Infinity	Infinity
597.3/12.5 (59656)	597.326	12.45	6.99472	1.3182e-07	27.6329	0	24.232	0	18.5507	0	27.6329	Infinity	Infinity
561.4/14.0 (55787)	561.399	14.01	6.99362	1.322e-07	178.002	0	182.41	0	119.516	0	178.002	Infinity	Infinity
544.2/8.1 (53545)	544.25	8.08	6.96858	1.4107e-07	122.613	0	86.3405	0	82.6223	0	122.613	Infinity	Infinity
284.1/8.6 (17971)	284.091	8.61	6.96251	1.4331e-07	9.18752	0	11.1383	0	6.19636	0	9.18752	Infinity	Infinity
676.3/1.1 (66797)	676.255	1.13	6.961	1.4387e-07	160.928	0	183.4	0	108.559	0	160.928	Infinity	Infinity
410.4/12.4 (35216)	410.409	12.38	6.95887	1.4467e-07	94.2133	0	116.965	0	63.5737	0	94.2133	Infinity	Infinity
142.1/2.8 (7740)	142.085	2.8	6.95797	1.4501e-07	83.7475	0	85.6494	0	56.5188	0	83.7475	Infinity	Infinity
602.3/13.2 (60195)	602.267	13.24	6.91753	1.6109e-07	16.7162	0	17.7961	0	11.3473	0	16.7162	Infinity	Infinity
425.9/2.3 (37398)	425.92	2.28	6.9116	1.6359e-07	43.8619	0	42.8674	0	29.7998	0	43.8619	Infinity	Infinity
592.4/15.4 (59149)	592.375	15.42	6.90311	1.6724e-07	198.132	0	131.717	0	134.777	0	198.132	Infinity	Infinity
351.2/2.9 (26848)	351.166	2.88	6.87642	1.7929e-07	97.7031	0	112.798	0	66.7191	0	97.7031	Infinity	Infinity
585.6/4.3 (58419)	585.572	4.28	6.86414	1.8512e-07	33.8645	0	31.7241	0	23.1666	0	33.8645	Infinity	Infinity
518.3/4.7 (50370)	518.318	4.74	6.82302	2.0609e-07	318.139	0	269.243	0	218.95	0	318.139	Infinity	Infinity
599.3/12.4 (59865)	599.284	12.37	6.82153	2.069e-07	190.63	0	159.768	0	131.224	0	190.63	Infinity	Infinity
366.2/3.2 (29083)	366.166	3.17	6.80885	2.1386e-07	200.823	0	149.599	0	138.498	0	200.823	Infinity	Infinity
556.3/13.1 (55149)	556.336	13.07	6.80114	2.1822e-07	59.3521	0	51.6896	0	40.9787	0	59.3521	Infinity	Infinity
706.3/1.1 (69037)	706.317	1.08	6.78392	2.2827e-07	101.274	0	95.4749	0	70.1007	0	101.274	Infinity	Infinity
544.8/4.2 (53646)	544.783	4.17	6.77132	2.3593e-07	212.129	0	172.211	0	147.106	0	212.129	Infinity	Infinity
459.2/4.9 (42178)	459.195	4.93	6.75766	2.4452e-07	153.36	0	167.504	0	106.567	0	153.36	Infinity	Infinity
545.7/3.1 (53772)	545.698	3.13	6.75756	2.4458e-07	151.765	0	171.98	0	105.46	0	151.765	Infinity	Infinity
319.9/2.2 (21591)	319.913	2.18	6.70803	2.7849e-07	19.3836	0	22.943	0	13.5689	0	19.3836	Infinity	Infinity
596.3/15.5 (59558)	596.347	15.51	6.70206	2.8289e-07	43.3887	0	31.2473	0	30.3999	0	43.3887	Infinity	Infinity
349.1/6.1 (26422)	349.12	6.1	6.67472	3.0396e-07	41.4798	0	31.0772	0	29.1815	0	41.4798	Infinity	Infinity
401.2/5.3 (33937)	401.192	5.34	6.65759	3.1796e-07	2287.38	0	2713.75	0	1613.34	0	2287.38	Infinity	Infinity
545.4/13.6 (53766)	545.372	13.63	6.61852	3.5239e-07	98.1643	0	108.075	0	69.6461	0	98.1643	Infinity	Infinity
628.4/5.6 (62880)	628.381	5.64	6.59489	3.7503e-07	48.7733	0	34.558	0	34.7279	0	48.7733	Infinity	Infinity
498.3/7.6 (47634)	498.329	7.64	6.56746	4.0318e-07	21.3146	0	15.0614	0	15.24	0	21.3146	Infinity	Infinity
414.4/12.6 (35812)	414.436	12.62	6.56166	4.094e-07	60.2471	0	49.6617	0	43.1148	0	60.2471	Infinity	Infinity
434.5/4.4 (38666)	434.521	4.36	6.55326	4.1858e-07	96.9673	0	72.9758	0	69.482	0	96.9673	Infinity	Infinity
580.4/15.5 (57907)	580.373	15.52	6.48181	5.0561e-07	85.9945	0	65.5465	0	62.2986	0	85.9945	Infinity	Infinity
340.9/2.1 (24926)	340.89	2.11	6.45681	5.4023e-07	15.1243	0	13.7267	0	10.9992	0	15.1243	Infinity	Infinity
590.3/5.0 (58918)	590.303	4.96	6.45656	5.406e-07	135.371	0	121.362	0	98.453	0	135.371	Infinity	Infinity
361.2/11.7 (28459)	361.213	11.73	6.44851	5.5225e-07	14.5783	0	12.7339	0	10.6158	0	14.5783	Infinity	Infinity
631.4/15.0 (63113)	631.386	15.02	6.3666	6.864e-07	217.902	0	130.43	0	160.716	0	217.902	Infinity	Infinity
615.8/6.2 (61595)	615.848	6.16	6.363	6.9301e-07	68.0343	0	58.9498	0	50.2078	0	68.0343	Infinity	Infinity
570.2/4.2 (56676)	570.174	4.19	6.35421	7.094e-07	57.7338	0	67.6012	0	42.6651	0	57.7338	Infinity	Infinity
347.9/2.9 (26203)	347.876	2.9	6.34938	7.1857e-07	36.3643	0	35.3604	0	26.8935	0	36.3643	Infinity	Infinity
172.1/4.6 (9570)	172.098	4.57	6.31714	7.8296e-07	30.2772	0	26.54	0	22.506	0	30.2772	Infinity	Infinity
431.2/5.3 (38243)	431.23	5.28	6.30701	8.0437e-07	45.1944	0	37.0716	0	33.6485	0	45.1944	Infinity	Infinity
702.2/3.7 (68728)	702.216	3.71	6.30235	8.1443e-07	72.51	0	45.8191	0	54.0256	0	72.51	Infinity	Infinity
577.3/3.6 (57551)	577.317	3.6	6.29741	8.2522e-07	108.997	0	126.694	0	81.2753	0	108.997	Infinity	Infinity
604.9/4.2 (60470)	604.915	4.16	6.23436	9.7639e-07	27.1948	0	31.1451	0	20.4832	0	27.1948	Infinity	Infinity
665.8/4.0 (66051)	665.761	4.02	6.22588	9.9874e-07	187.043	0	145.798	0	141.073	0	187.043	Infinity	Infinity
377.5/4.0 (30680)	377.483	4	6.22155	1.0104e-06	159.911	0	136.045	0	120.693	0	159.911	Infinity	Infinity
567.5/4.1 (56440)	567.535	4.07	6.21289	1.034e-06	24.6831	0	23.8618	0	18.6556	0	24.6831	Infinity	Infinity
549.3/13.8 (54246)	549.318	13.83	6.18626	1.1103e-06	40.2706	0	34.8687	0	30.5678	0	40.2706	Infinity	Infinity
684.4/7.4 (67477)	684.427	7.4	6.18334	1.119e-06	26.8302	0	25.3163	0	20.3753	0	26.8302	Infinity	Infinity
516.3/7.7 (50042)	516.254	7.67	6.18195	1.1232e-06	104.697	0	90.9458	0	79.5265	0	104.697	Infinity	Infinity
595.4/7.1 (59473)	595.379	7.14	6.17742	1.1369e-06	89.3138	0	85.8262	0	67.8916	0	89.3138	Infinity	Infinity
172.1/1.1 (9561)	172.06	1.09	6.17475	1.1451e-06	34.4909	0	37.9409	0	26.2294	0	34.4909	Infinity	Infinity
657.4/14.8 (65309)	657.361	14.78	6.15601	1.204e-06	63.2638	0	50.0819	0	48.257	0	63.2638	Infinity	Infinity
520.1/3.6 (50539)	520.138	3.61	6.14504	1.2399e-06	33.2568	0	44.5795	0	25.4132	0	33.2568	Infinity	Infinity
496.7/4.7 (47395)	496.655	4.71	6.13187	1.2844e-06	40.6179	0	39.4337	0	31.1049	0	40.6179	Infinity	Infinity
558.4/15.5 (55430)	558.392	15.51	6.12338	1.3139e-06	75.1895	0	51.2026	0	57.6594	0	75.1895	Infinity	Infinity
617.2/12.4 (61740)	617.249	12.41	6.10997	1.362e-06	38.3567	0	24.9526	0	29.4786	0	38.3567	Infinity	Infinity
657.4/3.3 (65315)	657.391	3.32	6.08826	1.4437e-06	166.79	0	157.504	0	128.641	0	166.79	Infinity	Infinity
580.2/4.3 (57841)	580.207	4.28	6.06564	1.5341e-06	41.3229	0	36.8491	0	31.9903	0	41.3229	Infinity	Infinity
577.8/6.5 (57589)	577.815	6.48	6.02061	1.7314e-06	13.2649	0	16.0709	0	10.3459	0	13.2649	Infinity	Infinity
542.4/15.0 (53356)	542.361	15	6.01865	1.7405e-06	58.203	0	44.6375	0	45.4099	0	58.203	Infinity	Infinity
144.0/4.6 (7821)	144.03	4.58	6.01318	1.7663e-06	22.8929	0	23.6837	0	17.8773	0	22.8929	Infinity	Infinity
212.0/1.2 (11945)	211.993	1.17	6.0118	1.7729e-06	152.588	0	195.877	0	119.185	0	152.588	Infinity	Infinity
756.8/4.2 (72171)	756.82	4.17	6.00403	1.8103e-06	174.356	0	209.175	0	136.363	0	174.356	Infinity	Infinity
576.9/4.5 (57474)	576.895	4.54	5.99987	1.8307e-06	27.1617	0	20.2838	0	21.2579	0	27.1617	Infinity	Infinity
472.5/4.1 (44044)	472.528	4.11	5.9984	1.838e-06	303.526	0	346.168	0	237.61	0	303.526	Infinity	Infinity
303.9/2.2 (19846)	303.942	2.22	5.99051	1.8774e-06	62.8846	0	71.9305	0	49.293	0	62.8846	Infinity	Infinity
679.3/6.1 (67062)	679.301	6.05	5.98391	1.911e-06	144.174	0	177.792	0	113.137	0	144.174	Infinity	Infinity
401.2/4.9 (33936)	401.192	4.93	5.97805	1.9414e-06	216.383	0	223.878	0	169.968	0	216.383	Infinity	Infinity
665.3/6.5 (66011)	665.302	6.52	5.95105	2.0878e-06	178.332	0	159.737	0	140.715	0	178.332	Infinity	Infinity
122.0/2.3 (6672)	122.024	2.28	5.9445	2.125e-06	502.855	0	584.238	0	397.22	0	502.855	Infinity	Infinity
472.3/5.7 (44031)	472.312	5.68	5.94362	2.13e-06	63.6027	0	59.0029	0	50.2491	0	63.6027	Infinity	Infinity
190.0/2.3 (10591)	190.011	2.28	5.93555	2.1769e-06	346.386	0	401.456	0	274.034	0	346.386	Infinity	Infinity
621.8/2.2 (62269)	621.843	2.23	5.91414	2.3062e-06	44.6586	0	32.5929	0	35.4583	0	44.6586	Infinity	Infinity
100.1/4.3 (5726)	100.076	4.25	5.89523	2.4269e-06	21.1895	0	25.5336	0	16.8781	0	21.1895	Infinity	Infinity
514.3/13.9 (49803)	514.33	13.94	5.86022	2.6674e-06	125.559	0	108.891	0	100.61	0	125.559	Infinity	Infinity
408.4/12.1 (34915)	408.393	12.09	5.85327	2.7179e-06	18.0223	0	19.0091	0	14.4582	0	18.0223	Infinity	Infinity
798.4/4.6 (74370)	798.435	4.64	5.83195	2.8791e-06	717.646	0	565.513	0	577.831	0	717.646	Infinity	Infinity
645.3/13.9 (64257)	645.304	13.89	5.82997	2.8945e-06	41.1966	0	41.1544	0	33.1817	0	41.1966	Infinity	Infinity
767.8/4.2 (72803)	767.808	4.16	5.82036	2.9707e-06	42.1432	0	45.5142	0	34.0002	0	42.1432	Infinity	Infinity
528.7/3.1 (51704)	528.725	3.15	5.81925	2.9796e-06	60.3566	0	57.8422	0	48.7037	0	60.3566	Infinity	Infinity
332.2/3.5 (23491)	332.217	3.46	5.79958	3.1424e-06	90.2182	0	67.6882	0	73.0469	0	90.2182	Infinity	Infinity
626.2/6.4 (62625)	626.194	6.37	5.7971	3.1636e-06	42.4607	0	51.7087	0	34.3938	0	42.4607	Infinity	Infinity
402.2/4.2 (34108)	402.213	4.24	5.76893	3.4141e-06	130.321	0	112.889	0	106.078	0	130.321	Infinity	Infinity
645.2/5.1 (64241)	645.24	5.08	5.76546	3.4463e-06	254.719	0	193.694	0	207.458	0	254.719	Infinity	Infinity
637.7/8.4 (63640)	637.658	8.4	5.76525	3.4483e-06	55.0227	0	75.816	0	44.8155	0	55.0227	Infinity	Infinity
550.3/14.5 (54378)	550.327	14.52	5.75587	3.5369e-06	266.424	0	230.245	0	217.353	0	266.424	Infinity	Infinity
622.2/12.4 (62285)	622.246	12.43	5.74675	3.6254e-06	26.6636	0	16.8453	0	21.7872	0	26.6636	Infinity	Infinity
546.4/13.4 (53884)	546.352	13.36	5.74278	3.6645e-06	29.2265	0	33.2506	0	23.8979	0	29.2265	Infinity	Infinity
507.3/5.3 (48802)	507.261	5.33	5.7418	3.6743e-06	177.78	0	157.287	0	145.392	0	177.78	Infinity	Infinity
549.2/7.5 (54197)	549.211	7.5	5.72575	3.8376e-06	60.9984	0	81.6051	0	50.0254	0	60.9984	Infinity	Infinity
650.8/4.3 (64717)	650.773	4.35	5.72253	3.8712e-06	97.3715	0	80.0763	0	79.9003	0	97.3715	Infinity	Infinity
535.3/12.0 (52503)	535.315	12.03	5.71548	3.9458e-06	47.6599	0	32.6636	0	39.1566	0	47.6599	Infinity	Infinity
637.9/4.5 (63651)	637.936	4.54	5.71029	4.0017e-06	17.087	0	17.5995	0	14.0512	0	17.087	Infinity	Infinity
603.4/7.2 (60336)	603.353	7.16	5.69825	4.1344e-06	90.4379	0	55.2162	0	74.5269	0	90.4379	Infinity	Infinity
573.1/5.3 (57016)	573.125	5.34	5.68072	4.3357e-06	215.942	0	281.868	0	178.5	0	215.942	Infinity	Infinity
310.9/1.2 (20555)	310.934	1.18	5.67359	4.4204e-06	83.7661	0	116.706	0	69.329	0	83.7661	Infinity	Infinity
433.2/3.0 (38513)	433.229	2.99	5.65267	4.6785e-06	53.9194	0	65.6892	0	44.7915	0	53.9194	Infinity	Infinity
741.9/5.8 (71303)	741.869	5.77	5.64474	4.7803e-06	89.3312	0	67.6781	0	74.3128	0	89.3312	Infinity	Infinity
572.3/14.0 (56953)	572.312	13.98	5.6399	4.8435e-06	16.4987	0	13.098	0	13.7367	0	16.4987	Infinity	Infinity
613.2/3.5 (61307)	613.198	3.53	5.6361	4.8937e-06	43.3994	0	55.8018	0	36.1584	0	43.3994	Infinity	Infinity
719.4/7.0 (69923)	719.377	6.99	5.61939	5.1208e-06	24.3612	0	18.0147	0	20.357	0	24.3612	Infinity	Infinity
419.2/4.9 (36492)	419.203	4.93	5.61823	5.137e-06	215.425	0	196.398	0	180.054	0	215.425	Infinity	Infinity
419.5/3.4 (36552)	419.526	3.37	5.60292	5.355e-06	53.5155	0	45.0626	0	44.8507	0	53.5155	Infinity	Infinity
388.0/2.3 (32119)	387.962	2.26	5.60177	5.3718e-06	1670.74	0	1787	0	1400.52	0	1670.74	Infinity	Infinity
534.9/4.2 (52437)	534.877	4.24	5.59499	5.4716e-06	22.7877	0	25.0416	0	19.1252	0	22.7877	Infinity	Infinity
409.9/2.2 (35100)	409.942	2.24	5.58858	5.5678e-06	278.432	0	287.999	0	233.949	0	278.432	Infinity	Infinity
274.2/4.5 (17072)	274.187	4.51	5.58162	5.674e-06	17.2869	0	20.4577	0	14.5433	0	17.2869	Infinity	Infinity
409.9/1.2 (35101)	409.946	1.17	5.58129	5.6792e-06	259.189	0	304.413	0	218.066	0	259.189	Infinity	Infinity
633.4/13.5 (63290)	633.363	13.48	5.57481	5.78e-06	30.4038	0	20.4656	0	25.6095	0	30.4038	Infinity	Infinity
434.2/4.4 (38599)	434.186	4.36	5.55855	6.0412e-06	130.094	0	112.104	0	109.9	0	130.094	Infinity	Infinity
611.3/6.1 (61150)	611.295	6.11	5.55295	6.1339e-06	14.3704	0	13.547	0	12.1521	0	14.3704	Infinity	Infinity
547.3/1.1 (53956)	547.259	1.12	5.54867	6.2057e-06	114.661	0	141.34	0	97.036	0	114.661	Infinity	Infinity
169.0/1.1 (9383)	169.035	1.06	5.53071	6.5163e-06	5.81207	0	6.25518	0	4.93463	0	5.81207	Infinity	Infinity
580.3/15.0 (57887)	580.316	14.98	5.52259	6.6618e-06	24.5875	0	20.5128	0	20.9062	0	24.5875	Infinity	Infinity
423.2/5.2 (37007)	423.224	5.23	5.52107	6.6895e-06	74.2946	0	55.0062	0	63.1886	0	74.2946	Infinity	Infinity
415.1/4.2 (35885)	415.147	4.16	5.49394	7.202e-06	133.47	0	111.378	0	114.078	0	133.47	Infinity	Infinity
536.7/4.1 (52641)	536.701	4.11	5.48595	7.3603e-06	14.8659	0	16.6711	0	12.7246	0	14.8659	Infinity	Infinity
536.3/13.5 (52615)	536.307	13.54	5.47042	7.678e-06	12.3352	0	10.3357	0	10.5884	0	12.3352	Infinity	Infinity
783.8/4.2 (73615)	783.794	4.17	5.4536	8.038e-06	34.3483	0	42.3282	0	29.5751	0	34.3483	Infinity	Infinity
406.0/1.2 (34554)	405.967	1.17	5.4499	8.1194e-06	77.2984	0	97.3907	0	66.6019	0	77.2984	Infinity	Infinity
510.4/15.1 (49308)	510.389	15.08	5.44979	8.1219e-06	47.0684	0	42.7763	0	40.5559	0	47.0684	Infinity	Infinity
543.7/4.1 (53499)	543.726	4.14	5.4443	8.2442e-06	94.563	0	76.2705	0	81.5612	0	94.563	Infinity	Infinity
425.9/1.2 (37399)	425.92	1.18	5.41472	8.936e-06	72.034	0	70.0741	0	62.4692	0	72.034	Infinity	Infinity
443.7/7.3 (39997)	443.711	7.31	5.39584	9.4078e-06	195.821	0	223.142	0	170.413	0	195.821	Infinity	Infinity
382.4/4.2 (31344)	382.406	4.16	5.39013	9.5555e-06	140.35	0	149.077	0	122.269	0	140.35	Infinity	Infinity
402.1/3.1 (34074)	402.15	3.13	5.38518	9.6853e-06	20.4763	0	16.4548	0	17.8548	0	20.4763	Infinity	Infinity
684.3/7.2 (67435)	684.301	7.24	5.37725	9.8969e-06	11.4552	0	15.3771	0	10.0034	0	11.4552	Infinity	Infinity
348.6/4.3 (26341)	348.623	4.3	5.36769	1.0158e-05	10.321	0	11.406	0	9.02902	0	10.321	Infinity	Infinity
682.3/7.0 (67269)	682.285	6.97	5.36581	1.0211e-05	124.227	0	136.244	0	108.714	0	124.227	Infinity	Infinity
262.1/4.0 (15885)	262.093	4.02	5.36186	1.0321e-05	33.8389	0	38.5657	0	29.635	0	33.8389	Infinity	Infinity
517.5/4.9 (50259)	517.482	4.89	5.35745	1.0446e-05	34.0492	0	36.1748	0	29.8437	0	34.0492	Infinity	Infinity
553.0/2.2 (54702)	553.042	2.22	5.33584	1.108e-05	102.771	0	153.392	0	90.4424	0	102.771	Infinity	Infinity
403.2/2.4 (34266)	403.22	2.42	5.33437	1.1124e-05	348.267	0	341.068	0	306.572	0	348.267	Infinity	Infinity
515.5/4.2 (49960)	515.542	4.16	5.32863	1.13e-05	847.079	0	875.026	0	746.471	0	847.079	Infinity	Infinity
437.2/5.7 (39057)	437.211	5.71	5.32735	1.134e-05	130.492	0	162.06	0	115.021	0	130.492	Infinity	Infinity
284.1/4.2 (17970)	284.087	4.24	5.31696	1.1666e-05	15.7482	0	14.8843	0	13.9082	0	15.7482	Infinity	Infinity
713.3/5.5 (69499)	713.332	5.5	5.30652	1.2003e-05	78.6514	0	73.7663	0	69.5986	0	78.6514	Infinity	Infinity
181.1/3.5 (10076)	181.087	3.5	5.30571	1.2029e-05	56.6134	0	35.7207	0	50.1049	0	56.6134	Infinity	Infinity
159.1/3.4 (8741)	159.076	3.35	5.28942	1.2576e-05	6.20692	0	5.95918	0	5.51027	0	6.20692	Infinity	Infinity
471.0/2.3 (43797)	470.967	2.29	5.28222	1.2826e-05	119.555	0	125.899	0	106.281	0	119.555	Infinity	Infinity
566.8/4.1 (56343)	566.827	4.15	5.27243	1.3173e-05	62.1699	0	60.7392	0	55.3699	0	62.1699	Infinity	Infinity
463.1/6.3 (42697)	463.112	6.3	5.2721	1.3185e-05	83.308	0	65.9644	0	74.2005	0	83.308	Infinity	Infinity
586.3/13.2 (58473)	586.291	13.24	5.26826	1.3324e-05	33.1357	0	33.4344	0	29.5348	0	33.1357	Infinity	Infinity
373.0/2.3 (30041)	372.999	2.26	5.26207	1.3551e-05	62.6086	0	62.5353	0	55.8704	0	62.6086	Infinity	Infinity
617.3/4.3 (61773)	617.313	4.34	5.26119	1.3584e-05	26.9339	0	34.2796	0	24.0392	0	26.9339	Infinity	Infinity
341.0/4.6 (24951)	341.044	4.59	5.23244	1.4693e-05	6.4724	0	6.5185	0	5.80852	0	6.4724	Infinity	Infinity
564.3/15.0 (56082)	564.343	14.98	5.22181	1.5126e-05	50.2473	0	39.2562	0	45.1851	0	50.2473	Infinity	Infinity
461.1/6.1 (42458)	461.146	6.05	5.2197	1.5213e-05	17.4835	0	20.0954	0	15.7285	0	17.4835	Infinity	Infinity
404.2/3.0 (34398)	404.229	3.01	5.19032	1.6485e-05	52.7201	0	49.3455	0	47.6965	0	52.7201	Infinity	Infinity
566.2/5.2 (56248)	566.183	5.23	5.18151	1.6886e-05	60.282	0	49.1791	0	54.6306	0	60.282	Infinity	Infinity
716.3/8.1 (69680)	716.274	8.08	5.18061	1.6928e-05	68.22	0	89.5288	0	61.8351	0	68.22	Infinity	Infinity
784.3/4.2 (73625)	784.3	4.16	5.17799	1.7049e-05	20.9935	0	26.0554	0	19.0383	0	20.9935	Infinity	Infinity
551.1/2.5 (54436)	551.097	2.5	5.17745	1.7075e-05	115.12	0	104.078	0	104.409	0	115.12	Infinity	Infinity
220.1/1.2 (12565)	220.063	1.22	5.16686	1.7576e-05	20.7878	0	10.2166	0	18.8924	0	20.7878	Infinity	Infinity
570.2/3.9 (56678)	570.175	3.91	5.15209	1.8299e-05	76.9701	0	96.0313	0	70.1524	0	76.9701	Infinity	Infinity
465.1/6.3 (42951)	465.11	6.3	5.12461	1.9727e-05	39.2233	0	33.4333	0	35.9408	0	39.2233	Infinity	Infinity
567.2/4.2 (56355)	567.17	4.24	5.12277	1.9826e-05	32.1596	0	28.3402	0	29.4788	0	32.1596	Infinity	Infinity
637.3/14.6 (63617)	637.339	14.59	5.10274	2.0942e-05	60.4447	0	48.7053	0	55.6236	0	60.4447	Infinity	Infinity
377.2/7.7 (30655)	377.209	7.7	5.09662	2.1295e-05	13.4478	0	14.4978	0	12.3901	0	13.4478	Infinity	Infinity
308.2/3.6 (20318)	308.195	3.59	5.09032	2.1665e-05	41.2286	0	36.3979	0	38.0328	0	41.2286	Infinity	Infinity
382.2/5.7 (31298)	382.182	5.68	5.08914	2.1735e-05	35.0951	0	31.2284	0	32.3822	0	35.0951	Infinity	Infinity
629.1/2.5 (62914)	629.121	2.54	5.07839	2.2383e-05	32.5341	0	37.8615	0	30.0827	0	32.5341	Infinity	Infinity
160.1/1.2 (8836)	160.095	1.21	5.07632	2.251e-05	65.3049	0	60.8765	0	60.4089	0	65.3049	Infinity	Infinity
538.8/2.2 (52915)	538.842	2.23	5.06878	2.2979e-05	20.1255	0	16.2553	0	18.6443	0	20.1255	Infinity	Infinity
550.7/4.0 (54402)	550.717	4.02	5.06629	2.3136e-05	8.79308	0	8.52584	0	8.14996	0	8.79308	Infinity	Infinity
170.0/2.3 (9422)	170.033	2.26	5.06369	2.3301e-05	19.78	0	21.8069	0	18.3427	0	19.78	Infinity	Infinity
568.2/7.5 (56484)	568.225	7.54	5.05615	2.3786e-05	38.0318	0	35.1812	0	35.3209	0	38.0318	Infinity	Infinity
626.6/5.9 (62703)	626.632	5.92	5.04842	2.4295e-05	52.2851	0	50.7067	0	48.6326	0	52.2851	Infinity	Infinity
552.3/3.3 (54649)	552.35	3.32	5.0351	2.5195e-05	27.6749	0	23.8293	0	25.8097	0	27.6749	Infinity	Infinity
445.2/3.1 (40213)	445.172	3.13	5.0343	2.5251e-05	41.0196	0	45.1162	0	38.261	0	41.0196	Infinity	Infinity
540.3/13.7 (53081)	540.286	13.71	5.02408	2.5966e-05	65.338	0	42.6362	0	61.068	0	65.338	Infinity	Infinity
168.0/3.4 (9346)	168.028	3.38	4.9991	2.7802e-05	47.6495	0	32.1355	0	44.7581	0	47.6495	Infinity	Infinity
584.3/6.6 (58250)	584.284	6.6	4.99881	2.7824e-05	26.5088	0	31.3832	0	24.9017	0	26.5088	Infinity	Infinity
529.9/2.2 (51861)	529.891	2.23	4.99565	2.8065e-05	24.2795	0	22.7008	0	22.8219	0	24.2795	Infinity	Infinity
228.1/5.0 (13084)	228.086	4.96	4.99415	2.818e-05	80.1659	0	86.5334	0	75.3759	0	80.1659	Infinity	Infinity
420.8/2.9 (36665)	420.814	2.92	4.97763	2.9483e-05	68.3288	0	67.7732	0	64.4593	0	68.3288	Infinity	Infinity
727.8/2.3 (70474)	727.844	2.28	4.97585	2.9627e-05	55.684	0	51.2092	0	52.5494	0	55.684	Infinity	Infinity
536.3/13.9 (52621)	536.312	13.94	4.97456	2.9732e-05	89.2325	0	81.1769	0	84.2312	0	89.2325	Infinity	Infinity
623.2/7.5 (62385)	623.186	7.51	4.9723	2.9916e-05	28.8416	0	28.4968	0	27.2374	0	28.8416	Infinity	Infinity
221.9/2.1 (12660)	221.946	2.11	4.95229	3.1598e-05	5.2258	0	4.13191	0	4.95508	0	5.2258	Infinity	Infinity
434.2/5.7 (38634)	434.227	5.71	4.95088	3.172e-05	18.0848	0	13.5412	0	17.1528	0	18.0848	Infinity	Infinity
622.9/7.5 (62375)	622.866	7.48	4.94679	3.2077e-05	17.0383	0	13.7049	0	16.1736	0	17.0383	Infinity	Infinity
552.3/13.9 (54618)	552.286	13.93	4.93448	3.3175e-05	37.3392	0	35.5723	0	35.5327	0	37.3392	Infinity	Infinity
586.3/12.6 (58517)	586.344	12.63	4.92772	3.3794e-05	20.3584	0	14.5332	0	19.4	0	20.3584	Infinity	Infinity
607.3/1.1 (60750)	607.349	1.14	4.92744	3.382e-05	37.9689	0	33.1714	0	36.1836	0	37.9689	Infinity	Infinity
402.2/3.2 (34106)	402.213	3.16	4.92709	3.3853e-05	23.2775	0	17.4183	0	22.1846	0	23.2775	Infinity	Infinity
487.0/1.2 (46040)	487.004	1.21	4.91955	3.4557e-05	64.0062	0	92.864	0	61.0943	0	64.0062	Infinity	Infinity
535.2/5.8 (52447)	535.181	5.8	4.90802	3.5664e-05	61.6555	0	33.445	0	58.9888	0	61.6555	Infinity	Infinity
581.3/12.2 (57984)	581.296	12.22	4.90588	3.5873e-05	12.2982	0	8.6389	0	11.7714	0	12.2982	Infinity	Infinity
507.9/1.2 (48893)	507.909	1.22	4.89863	3.6592e-05	37.8381	0	38.4236	0	36.2709	0	37.8381	Infinity	Infinity
514.3/7.8 (49791)	514.302	7.77	4.89138	3.7325e-05	9.22473	0	7.00259	0	8.85578	0	9.22473	Infinity	Infinity
389.2/2.4 (32348)	389.24	2.38	4.87028	3.9541e-05	42.2814	0	34.512	0	40.7661	0	42.2814	Infinity	Infinity
589.3/13.8 (58836)	589.338	13.8	4.85612	4.1101e-05	39.5114	0	29.7719	0	38.2065	0	39.5114	Infinity	Infinity
695.2/2.9 (68231)	695.237	2.86	4.85613	4.1101e-05	55.4174	0	39.007	0	53.5871	0	55.4174	Infinity	Infinity
271.0/3.3 (16680)	270.98	3.35	4.85273	4.1485e-05	25.7782	0	18.2608	0	24.9443	0	25.7782	Infinity	Infinity
534.3/1.1 (52374)	534.274	1.13	4.8474	4.2093e-05	161.929	0	228.752	0	156.863	0	161.929	Infinity	Infinity
354.9/4.1 (27550)	354.898	4.11	4.83764	4.3231e-05	61.1568	0	72.4493	0	59.3629	0	61.1568	Infinity	Infinity
391.2/1.1 (32605)	391.231	1.11	4.82543	4.4699e-05	529.791	0	738.957	0	515.553	0	529.791	Infinity	Infinity
338.2/1.1 (24517)	338.158	1.12	4.82476	4.4781e-05	82.0114	0	119.485	0	79.8183	0	82.0114	Infinity	Infinity
598.3/14.8 (59768)	598.327	14.77	4.81748	4.5681e-05	43.579	0	27.9144	0	42.4778	0	43.579	Infinity	Infinity
557.3/1.1 (55253)	557.278	1.11	4.81578	4.5894e-05	82.6763	0	116.78	0	80.6156	0	82.6763	Infinity	Infinity
559.3/1.1 (55482)	559.268	1.12	4.80444	4.7338e-05	110.746	0	163.24	0	108.241	0	110.746	Infinity	Infinity
578.8/4.8 (57694)	578.751	4.84	4.80431	4.7355e-05	17.179	0	20.3135	0	16.7908	0	17.179	Infinity	Infinity
500.4/4.0 (47914)	500.355	3.96	4.80266	4.7569e-05	76.7805	0	83.6709	0	75.0712	0	76.7805	Infinity	Infinity
655.3/13.5 (65086)	655.345	13.5	4.80142	4.773e-05	46.9969	0	33.8154	0	45.9625	0	46.9969	Infinity	Infinity
762.2/4.0 (72473)	762.21	4.03	4.79817	4.8156e-05	80.8793	0	57.0989	0	79.1528	0	80.8793	Infinity	Infinity
343.6/2.9 (25563)	343.623	2.89	4.78923	4.9347e-05	6.65921	0	6.21518	0	6.52921	0	6.65921	Infinity	Infinity
527.1/3.1 (51450)	527.147	3.1	4.78009	5.0596e-05	11.4427	0	12.7066	0	11.2408	0	11.4427	Infinity	Infinity
388.2/1.5 (32193)	388.217	1.54	4.77876	5.078e-05	9.08378	0	12.513	0	8.92598	0	9.08378	Infinity	Infinity
368.7/3.5 (29440)	368.697	3.51	4.77021	5.1981e-05	27.1548	0	24.5619	0	26.7309	0	27.1548	Infinity	Infinity
465.1/6.9 (42954)	465.112	6.93	4.75569	5.4084e-05	155.676	0	206.649	0	153.714	0	155.676	Infinity	Infinity
690.9/2.3 (67946)	690.898	2.28	4.75231	5.4586e-05	72.2815	0	65.3733	0	71.4211	0	72.2815	Infinity	Infinity
594.3/13.6 (59364)	594.348	13.62	4.75154	5.4701e-05	23.781	0	14.2716	0	23.5018	0	23.781	Infinity	Infinity
615.4/14.6 (61549)	615.358	14.59	4.7411	5.6284e-05	35.0608	0	26.3277	0	34.7254	0	35.0608	Infinity	Infinity
554.3/12.6 (54852)	554.264	12.55	4.74031	5.6406e-05	22.0417	0	14.1736	0	21.8345	0	22.0417	Infinity	Infinity
220.1/2.5 (12562)	220.061	2.46	4.73835	5.6708e-05	8.67775	0	4.50872	0	8.59971	0	8.67775	Infinity	Infinity
218.1/4.1 (12449)	218.102	4.1	4.73681	5.6947e-05	3.28695	0	4.13012	0	3.25845	0	3.28695	Infinity	Infinity
518.3/4.9 (50333)	518.271	4.93	4.7352	5.7198e-05	59.7814	0	44.8721	0	59.2832	0	59.7814	Infinity	Infinity
731.0/4.2 (70642)	730.972	4.2	4.73143	5.779e-05	22.3216	0	20.776	0	22.1532	0	22.3216	Infinity	Infinity
772.6/6.0 (73054)	772.592	6.04	4.714	6.0608e-05	8.7346	0	5.41042	0	8.70077	0	8.7346	Infinity	Infinity
386.0/2.3 (31807)	385.968	2.28	4.70071	6.285e-05	91.6528	0	95.0374	0	91.5561	0	91.6528	Infinity	Infinity
174.0/1.0 (9646)	174.017	1.01	4.69419	6.3978e-05	24.0059	0	15.0602	0	24.0139	0	24.0059	Infinity	Infinity
353.2/1.0 (27257)	353.154	1.04	4.68168	6.6201e-05	12.8591	0	10.4315	0	12.8977	0	12.8591	Infinity	Infinity
529.9/1.2 (51862)	529.898	1.2	4.6805	6.6416e-05	58.2892	0	67.2407	0	58.4791	0	58.2892	Infinity	Infinity
562.7/5.8 (55903)	562.661	5.84	4.66423	6.9431e-05	68.0826	0	67.623	0	68.5425	0	68.0826	Infinity	Infinity
705.9/2.3 (69010)	705.861	2.26	4.66231	6.9797e-05	77.831	0	43.8913	0	78.3891	0	77.831	Infinity	Infinity
372.2/3.8 (29949)	372.185	3.84	4.65394	7.1409e-05	66.4389	0	68.9771	0	67.0356	0	66.4389	Infinity	Infinity
559.3/8.9 (55512)	559.315	8.87	4.64851	7.2476e-05	102.275	0	71.4951	0	103.314	0	102.275	Infinity	Infinity
262.0/1.2 (15875)	261.965	1.22	4.64748	7.2681e-05	3.23862	0	4.10662	0	3.27226	0	3.23862	Infinity	Infinity
671.3/13.5 (66467)	671.318	13.5	4.64344	7.3486e-05	32.8462	0	26.5038	0	33.2162	0	32.8462	Infinity	Infinity
606.2/6.6 (60578)	606.243	6.65	4.63623	7.4946e-05	17.4978	0	11.7578	0	17.7224	0	17.4978	Infinity	Infinity
772.8/4.2 (73065)	772.808	4.16	4.63386	7.5432e-05	554.043	0	520.345	0	561.442	0	554.043	Infinity	Infinity
772.8/6.1 (73063)	772.8	6.06	4.62262	7.7782e-05	19.0642	0	22.9424	0	19.3657	0	19.0642	Infinity	Infinity
318.9/1.3 (21460)	318.916	1.26	4.61558	7.9291e-05	29.6485	0	25.6388	0	30.1635	0	29.6485	Infinity	Infinity
255.1/4.2 (15321)	255.144	4.24	4.60913	8.0698e-05	16.9329	0	17.8408	0	17.2511	0	16.9329	Infinity	Infinity
577.0/2.3 (57476)	576.966	2.28	4.60102	8.2502e-05	58.0796	0	45.9316	0	59.2752	0	58.0796	Infinity	Infinity
639.2/4.0 (63740)	639.187	3.98	4.58112	8.7105e-05	20.4154	0	15.0761	0	20.9262	0	20.4154	Infinity	Infinity
453.5/4.1 (41387)	453.527	4.1	4.56974	8.985e-05	4.75185	0	6.19176	0	4.88287	0	4.75185	Infinity	Infinity
448.8/4.2 (40710)	448.849	4.18	4.54283	9.6689e-05	30.2991	0	27.1309	0	31.319	0	30.2991	Infinity	Infinity
653.3/14.6 (64923)	653.312	14.59	4.53505	9.876e-05	31.9007	0	24.1585	0	33.0311	0	31.9007	Infinity	Infinity
469.0/2.3 (43526)	469.026	2.32	4.51472	0.0001	22.7242	0	17.4258	0	23.6353	0	22.7242	Infinity	Infinity
533.4/14.0 (52307)	533.37	14	4.52882	0.0001	11.5599	0	9.67704	0	11.986	0	11.5599	Infinity	Infinity
646.3/14.3 (64365)	646.325	14.27	4.52846	0.0001	18.6976	0	12.063	0	19.3883	0	18.6976	Infinity	Infinity
207.1/3.4 (11659)	207.077	3.44	4.49364	0.00011	9.04928	0	5.58258	0	9.45627	0	9.04928	Infinity	Infinity
688.3/1.1 (67724)	688.31	1.1	4.50769	0.00011	45.1206	0	34.1217	0	47.003	0	45.1206	Infinity	Infinity
429.9/1.2 (38020)	429.907	1.15	4.45966	0.00012	35.7629	0	33.1696	0	37.6562	0	35.7629	Infinity	Infinity
520.1/3.8 (50541)	520.144	3.8	4.46113	0.00012	18.3128	0	16.3031	0	19.2759	0	18.3128	Infinity	Infinity
646.4/4.0 (64384)	646.379	4.03	4.47102	0.00012	110.986	0	84.8375	0	116.565	0	110.986	Infinity	Infinity
272.2/2.5 (16812)	272.172	2.45	4.423	0.00013	42.849	0	52.5724	0	45.4913	0	42.849	Infinity	Infinity
357.0/2.2 (27815)	357.022	2.19	4.441	0.00013	25.2574	0	11.3628	0	26.7061	0	25.2574	Infinity	Infinity
359.7/3.6 (28231)	359.67	3.57	4.43251	0.00013	26.0087	0	27.0247	0	27.5532	0	26.0087	Infinity	Infinity
370.9/1.4 (29755)	370.928	1.39	4.44654	0.00013	9.1718	0	5.95715	0	9.68583	0	9.1718	Infinity	Infinity
416.3/1.1 (36131)	416.264	1.12	4.42906	0.00013	124.557	0	120.954	0	132.056	0	124.557	Infinity	Infinity
505.9/1.2 (48581)	505.915	1.21	4.42812	0.00013	10.1345	0	9.60065	0	10.747	0	10.1345	Infinity	Infinity
671.3/15.0 (66478)	671.349	14.99	4.43149	0.00013	19.223	0	9.9749	0	20.3693	0	19.223	Infinity	Infinity
700.3/6.5 (68553)	700.26	6.51	4.44238	0.00013	20.5839	0	20.9151	0	21.7579	0	20.5839	Infinity	Infinity
749.1/8.7 (71736)	749.073	8.69	4.42315	0.00013	132.444	0	71.8056	0	140.606	0	132.444	Infinity	Infinity
457.2/2.3 (41904)	457.24	2.26	4.39733	0.00014	60.1503	0	45.5647	0	64.2322	0	60.1503	Infinity	Infinity
583.6/5.0 (58203)	583.603	4.99	4.41896	0.00014	51.4479	0	38.3552	0	54.6703	0	51.4479	Infinity	Infinity
745.4/5.7 (71517)	745.4	5.71	4.41012	0.00014	93.1024	0	88.1764	0	99.1322	0	93.1024	Infinity	Infinity
335.1/4.3 (23925)	335.123	4.28	4.39374	0.00015	14.5426	0	12.9405	0	15.5422	0	14.5426	Infinity	Infinity
384.2/6.6 (31551)	384.194	6.56	4.38145	0.00015	253.98	0	198.508	0	272.198	0	253.98	Infinity	Infinity
708.3/1.1 (69185)	708.299	1.13	4.36073	0.00016	33.0725	0	34.4419	0	35.6133	0	33.0725	Infinity	Infinity
272.2/4.1 (16813)	272.172	4.11	4.34391	0.00017	68.3462	0	72.1649	0	73.8818	0	68.3462	Infinity	Infinity
401.3/4.7 (34002)	401.286	4.71	4.34602	0.00017	33.6714	0	41.0441	0	36.381	0	33.6714	Infinity	Infinity
481.2/4.0 (45165)	481.226	4.02	4.33944	0.00017	52.1779	0	41.8426	0	56.4621	0	52.1779	Infinity	Infinity
593.3/5.6 (59263)	593.338	5.63	4.34312	0.00017	22.6326	0	15.5402	0	24.4701	0	22.6326	Infinity	Infinity
558.2/4.0 (55345)	558.197	3.99	4.31611	0.00018	13.9128	0	12.7616	0	15.1366	0	13.9128	Infinity	Infinity
488.2/5.1 (46210)	488.22	5.14	4.2916	0.00019	28.3215	0	25.9971	0	30.9885	0	28.3215	Infinity	Infinity
241.1/5.8 (14103)	241.109	5.81	4.27857	0.0002	7.29849	0	8.45271	0	8.01012	0	7.29849	Infinity	Infinity
342.0/2.2 (25213)	342.029	2.22	4.27522	0.0002	12.534	0	9.35888	0	13.7668	0	12.534	Infinity	Infinity
538.4/7.7 (52873)	538.365	7.67	4.27307	0.0002	115.718	0	91.8029	0	127.165	0	115.718	Infinity	Infinity
500.2/5.8 (47846)	500.233	5.82	4.26045	0.00021	12.5125	0	13.3194	0	13.7909	0	12.5125	Infinity	Infinity
738.3/4.6 (71090)	738.305	4.56	4.26306	0.00021	11.9024	0	4.94122	0	13.1105	0	11.9024	Infinity	Infinity
490.1/5.3 (46466)	490.123	5.34	4.23488	0.00022	115.718	0	33.1676	0	128.311	0	115.718	Infinity	Infinity
507.9/2.2 (48891)	507.902	2.16	4.23896	0.00022	45.2433	0	19.4991	0	50.1187	0	45.2433	Infinity	Infinity
532.3/6.9 (52168)	532.282	6.92	4.23267	0.00022	49.9948	0	18.1882	0	55.4644	0	49.9948	Infinity	Infinity
357.2/5.5 (27860)	357.169	5.5	4.22563	0.00023	12.8653	0	11.198	0	14.2966	0	12.8653	Infinity	Infinity
482.8/1.2 (45426)	482.825	1.18	4.21766	0.00023	34.0479	0	14.4906	0	37.9073	0	34.0479	Infinity	Infinity
544.2/5.3 (53538)	544.229	5.28	4.21898	0.00023	31.1179	0	32.9186	0	34.6343	0	31.1179	Infinity	Infinity
308.1/2.8 (20267)	308.081	2.81	4.19259	0.00025	11.3607	0	9.86322	0	12.7241	0	11.3607	Infinity	Infinity
431.9/4.2 (38302)	431.85	4.23	4.1943	0.00025	39.0239	0	35.6017	0	43.6893	0	39.0239	Infinity	Infinity
624.6/4.1 (62524)	624.605	4.09	4.18753	0.00025	19.6399	0	15.1565	0	22.0235	0	19.6399	Infinity	Infinity
585.2/6.6 (58342)	585.233	6.63	4.17382	0.00026	34.6639	0	26.1073	0	38.9985	0	34.6639	Infinity	Infinity
405.8/4.2 (34547)	405.834	4.24	4.15769	0.00027	135.884	0	117.868	0	153.469	0	135.884	Infinity	Infinity
544.3/5.5 (53566)	544.281	5.49	4.16133	0.00027	33.1095	0	16.6814	0	37.3615	0	33.1095	Infinity	Infinity
576.3/14.8 (57440)	576.346	14.77	4.16914	0.00027	38.4613	0	20.3636	0	43.3194	0	38.4613	Infinity	Infinity
635.8/5.7 (63485)	635.834	5.73	4.15728	0.00028	133.829	0	109.33	0	151.163	0	133.829	Infinity	Infinity
705.3/3.8 (68944)	705.272	3.83	4.15011	0.00028	20.4506	0	23.4586	0	23.1393	0	20.4506	Infinity	Infinity
709.4/8.1 (69287)	709.39	8.09	4.14251	0.00029	23.472	0	15.3222	0	26.6067	0	23.472	Infinity	Infinity
264.1/4.7 (16108)	264.113	4.7	4.12751	0.0003	1.63512	0	1.63272	0	1.86023	0	1.63512	Infinity	Infinity
657.2/6.9 (65255)	657.238	6.93	4.12563	0.0003	46.3385	0	36.9109	0	52.7419	0	46.3385	Infinity	Infinity
617.3/12.1 (61771)	617.311	12.12	4.10975	0.00031	66.1317	0	22.7868	0	75.561	0	66.1317	Infinity	Infinity
695.2/1.1 (68234)	695.246	1.11	4.11777	0.00031	28.4035	0	23.0553	0	32.3902	0	28.4035	Infinity	Infinity
673.4/7.5 (66640)	673.389	7.54	4.09054	0.00033	36.2053	0	15.4742	0	41.562	0	36.2053	Infinity	Infinity
721.2/6.0 (70032)	721.189	5.98	4.07591	0.00034	7.63735	0	3.15393	0	8.79878	0	7.63735	Infinity	Infinity
426.6/4.2 (37513)	426.624	4.24	4.0584	0.00036	39.5134	0	32.683	0	45.7188	0	39.5134	Infinity	Infinity
196.1/3.0 (10955)	196.12	3.01	4.04649	0.00037	54.0822	0	39.171	0	62.7595	0	54.0822	Infinity	Infinity
475.3/4.5 (44403)	475.256	4.47	4.0503	0.00037	16.8112	0	11.6197	0	19.4902	0	16.8112	Infinity	Infinity
740.9/6.3 (71247)	740.868	6.26	4.05063	0.00037	15.4436	0	9.05996	0	17.9032	0	15.4436	Infinity	Infinity
789.4/4.6 (73937)	789.427	4.64	4.05008	0.00037	33.3103	0	21.0267	0	38.6206	0	33.3103	Infinity	Infinity
254.0/3.4 (15195)	254.03	3.39	4.036	0.00038	2.37345	0	1.99241	0	2.76142	0	2.37345	Infinity	Infinity
409.2/5.6 (34995)	409.186	5.58	4.03866	0.00038	33.8098	0	28.9125	0	39.3106	0	33.8098	Infinity	Infinity
684.3/6.1 (67434)	684.299	6.06	4.03841	0.00038	32.1765	0	33.0522	0	37.4139	0	32.1765	Infinity	Infinity
466.1/1.7 (43102)	466.132	1.75	4.00371	0.00042	36.9274	0	12.4054	0	43.3102	0	36.9274	Infinity	Infinity
218.1/4.5 (12452)	218.104	4.47	3.9869	0.00044	16.5282	0	10.1663	0	19.4668	0	16.5282	Infinity	Infinity
660.0/7.1 (65587)	660.012	7.09	3.97443	0.00045	15.0927	0	10.3745	0	17.8318	0	15.0927	Infinity	Infinity
264.1/2.8 (16086)	264.053	2.81	3.96511	0.00046	29.123	0	15.8584	0	34.4894	0	29.123	Infinity	Infinity
285.1/3.9 (18109)	285.133	3.92	3.96596	0.00046	10.2566	0	6.56649	0	12.1439	0	10.2566	Infinity	Infinity
353.6/4.4 (27364)	353.649	4.42	3.96923	0.00046	82.2738	0	76.4936	0	97.3329	0	82.2738	Infinity	Infinity
404.2/1.1 (34379)	404.195	1.12	3.95948	0.00047	331.398	0	0	0	393.021	0	331.398	Infinity	Infinity
627.1/4.5 (62726)	627.097	4.54	3.95747	0.00047	16.7685	0	15.0086	0	19.8967	0	16.7685	Infinity	Infinity
368.2/5.9 (29374)	368.18	5.89	3.9539	0.00048	10.5558	0	7.72285	0	12.5363	0	10.5558	Infinity	Infinity
165.0/1.0 (9156)	165.022	1.02	3.93567	0.0005	3.25778	0	1.41182	0	3.88694	0	3.25778	Infinity	Infinity
425.1/2.5 (37267)	425.118	2.48	3.93242	0.0005	20.2017	0	0	0	24.1231	0	20.2017	Infinity	Infinity
478.3/1.1 (44753)	478.255	1.13	3.93762	0.0005	107.053	0	0	0	127.664	0	107.053	Infinity	Infinity
585.7/6.4 (58423)	585.663	6.39	3.93627	0.0005	11.0271	0	9.05805	0	13.1547	0	11.0271	Infinity	Infinity
580.3/4.7 (57894)	580.332	4.71	3.92429	0.00051	132.422	0	137.691	0	158.454	0	132.422	Infinity	Infinity
603.7/3.9 (60351)	603.724	3.85	3.91754	0.00052	61.4215	0	60.4926	0	73.6226	0	61.4215	Infinity	Infinity
618.4/3.5 (61930)	618.38	3.53	3.92059	0.00052	13.2765	0	9.97079	0	15.9015	0	13.2765	Infinity	Infinity
719.4/4.5 (69927)	719.409	4.53	3.92196	0.00052	6.27706	0	6.44691	0	7.51549	0	6.27706	Infinity	Infinity
509.5/4.1 (49165)	509.544	4.13	3.91456	0.00053	16.3832	0	0	0	19.6526	0	16.3832	Infinity	Infinity
526.3/2.4 (51363)	526.28	2.37	3.91423	0.00053	15.1479	0	0	0	18.1723	0	15.1479	Infinity	Infinity
352.1/4.0 (26988)	352.09	3.96	3.90408	0.00054	30.6332	0	16.8944	0	36.845	0	30.6332	Infinity	Infinity
378.2/6.5 (30795)	378.24	6.47	3.90562	0.00054	9.91743	0	4.14859	0	11.9238	0	9.91743	Infinity	Infinity
703.9/2.3 (68869)	703.922	2.28	3.90517	0.00054	14.5661	0	0	0	17.5149	0	14.5661	Infinity	Infinity
581.3/4.4 (57979)	581.291	4.37	3.90191	0.00055	56.885	0	0	0	68.4581	0	56.885	Infinity	Infinity
717.3/5.9 (69774)	717.343	5.89	3.89619	0.00055	37.8479	0	27.0588	0	45.6148	0	37.8479	Infinity	Infinity
639.3/14.6 (63773)	639.349	14.63	3.89449	0.00056	19.417	0	8.42912	0	23.4119	0	19.417	Infinity	Infinity
353.1/4.8 (27196)	353.115	4.79	3.8832	0.00057	29.2406	0	0	0	35.3591	0	29.2406	Infinity	Infinity
408.9/3.8 (34941)	408.913	3.8	3.88277	0.00057	35.4959	0	0	0	42.928	0	35.4959	Infinity	Infinity
534.3/1.1 (52381)	534.28	1.12	3.88422	0.00057	144.293	0	0	0	174.439	0	144.293	Infinity	Infinity
684.3/7.7 (67436)	684.301	7.75	3.88502	0.00057	55.9988	0	40.8923	0	67.6847	0	55.9988	Infinity	Infinity
568.3/13.4 (56539)	568.333	13.38	3.87691	0.00058	15.255	0	7.32286	0	18.477	0	15.255	Infinity	Infinity
673.0/2.3 (66581)	672.98	2.32	3.87884	0.00058	8.35986	0	2.9734	0	10.1205	0	8.35986	Infinity	Infinity
357.0/1.2 (27813)	357.019	1.17	3.87374	0.00059	63.49	0	34.6632	0	76.9624	0	63.49	Infinity	Infinity
428.2/7.1 (37707)	428.166	7.09	3.8731	0.00059	17.4601	0	0	0	21.1686	0	17.4601	Infinity	Infinity
460.8/1.2 (42436)	460.849	1.2	3.8657	0.0006	76.1852	0	6.56709	0	92.5438	0	76.1852	Infinity	Infinity
712.3/1.1 (69437)	712.328	1.12	3.86803	0.0006	87.0581	0	0	0	105.687	0	87.0581	Infinity	Infinity
481.2/3.7 (45144)	481.199	3.74	3.84733	0.00063	27.24	0	7.35709	0	33.247	0	27.24	Infinity	Infinity
490.9/1.4 (46574)	490.875	1.37	3.84231	0.00064	9.29358	0	0	0	11.3578	0	9.29358	Infinity	Infinity
718.3/9.1 (69817)	718.267	9.14	3.84147	0.00064	26.02	0	9.94691	0	31.8064	0	26.02	Infinity	Infinity
438.2/4.3 (39197)	438.222	4.31	3.82838	0.00066	105.423	0	11.5142	0	129.308	0	105.423	Infinity	Infinity
357.1/4.7 (27824)	357.086	4.69	3.82681	0.00067	52.3301	0	0	0	64.2123	0	52.3301	Infinity	Infinity
575.3/1.1 (57308)	575.288	1.12	3.82756	0.00067	86.63	0	0	0	106.28	0	86.63	Infinity	Infinity
609.9/2.3 (61006)	609.908	2.3	3.82338	0.00067	12.6709	0	9.00937	0	15.5619	0	12.6709	Infinity	Infinity
217.1/6.0 (12344)	217.095	5.99	3.81625	0.00069	15.0394	0	0	0	18.5053	0	15.0394	Infinity	Infinity
791.5/8.2 (74063)	791.488	8.2	3.81573	0.00069	23.79	0	0	0	29.2766	0	23.79	Infinity	Infinity
562.3/4.6 (55831)	562.259	4.63	3.80619	0.0007	59.8143	0	28.4045	0	73.7936	0	59.8143	Infinity	Infinity
782.5/7.2 (73560)	782.477	7.21	3.80306	0.00071	5.62433	0	4.59662	0	6.94452	0	5.62433	Infinity	Infinity
355.5/4.1 (27653)	355.509	4.14	3.7825	0.00075	44.2928	0	38.1161	0	54.9868	0	44.2928	Infinity	Infinity
279.2/4.1 (17481)	279.164	4.11	3.77911	0.00076	205.791	0	137.757	0	255.706	0	205.791	Infinity	Infinity
557.2/5.3 (55206)	557.153	5.25	3.77908	0.00076	141.976	0	117.801	0	176.414	0	141.976	Infinity	Infinity
438.5/4.0 (39229)	438.508	4.02	3.7722	0.00077	16.5715	0	16.4108	0	20.6286	0	16.5715	Infinity	Infinity
755.5/5.9 (72101)	755.466	5.88	3.76347	0.00079	37.1353	0	28.0792	0	46.3343	0	37.1353	Infinity	Infinity
499.2/3.4 (47724)	499.238	3.39	3.75871	0.0008	6.37746	0	0	0	7.96734	0	6.37746	Infinity	Infinity
585.2/7.5 (58341)	585.233	7.52	3.7571	0.0008	45.1832	0	0	0	56.4714	0	45.1832	Infinity	Infinity
689.3/1.1 (67809)	689.328	1.12	3.75606	0.0008	38.1122	0	0	0	47.647	0	38.1122	Infinity	Infinity
388.3/3.5 (32212)	388.253	3.46	3.75014	0.00082	5.14432	0	0	0	6.44147	0	5.14432	Infinity	Infinity
469.3/4.3 (43588)	469.267	4.32	3.75113	0.00082	27.6225	0	12.67	0	34.5785	0	27.6225	Infinity	Infinity
625.3/7.1 (62595)	625.341	7.08	3.73945	0.00084	2.73498	0	0	0	3.4344	0	2.73498	Infinity	Infinity
531.3/1.1 (52061)	531.305	1.12	3.73388	0.00085	96.0314	0	0	0	120.769	0	96.0314	Infinity	Infinity
601.7/4.5 (60141)	601.718	4.47	3.73594	0.00085	28.1355	0	20.6943	0	35.3638	0	28.1355	Infinity	Infinity
390.2/3.3 (32430)	390.175	3.32	3.73107	0.00086	5.54477	0	0	0	6.97837	0	5.54477	Infinity	Infinity
216.1/6.0 (12285)	216.124	5.97	3.72623	0.00087	4.08732	0	0	0	5.15078	0	4.08732	Infinity	Infinity
463.2/3.1 (42710)	463.178	3.13	3.72736	0.00087	28.7878	0	12.3145	0	36.267	0	28.7878	Infinity	Infinity
333.1/3.5 (23552)	333.094	3.5	3.72448	0.00088	1.55363	0	1.30115	0	1.95878	0	1.55363	Infinity	Infinity
437.2/4.9 (39062)	437.213	4.93	3.7161	0.00089	25.8729	0	21.5448	0	32.6935	0	25.8729	Infinity	Infinity
485.3/1.1 (45842)	485.284	1.1	3.71808	0.00089	103.214	0	0	0	130.354	0	103.214	Infinity	Infinity
183.1/2.9 (10176)	183.075	2.9	3.70552	0.00092	2.24695	0	0	0	2.84741	0	2.24695	Infinity	Infinity
217.1/6.0 (12352)	217.099	6.01	3.70625	0.00092	16.6707	0	0	0	21.1215	0	16.6707	Infinity	Infinity
281.1/4.6 (17666)	281.095	4.61	3.70075	0.00093	61.1356	0	0	0	77.5727	0	61.1356	Infinity	Infinity
318.9/2.1 (21456)	318.908	2.11	3.69954	0.00093	21.7436	0	7.64014	0	27.5987	0	21.7436	Infinity	Infinity
168.0/2.3 (9349)	168.03	2.28	3.69562	0.00094	1466.31	0	0	0	1863.13	0	1466.31	Infinity	Infinity
415.2/6.4 (35933)	415.208	6.41	3.68779	0.00096	52.142	0	0	0	66.3935	0	52.142	Infinity	Infinity
571.4/4.2 (56880)	571.39	4.21	3.68615	0.00097	69.7383	0	57.6522	0	88.8389	0	69.7383	Infinity	Infinity
534.3/1.8 (52377)	534.276	1.76	3.67981	0.00098	18.8409	0	5.43505	0	24.0426	0	18.8409	Infinity	Infinity
222.1/4.6 (12669)	222.079	4.56	3.67744	0.00099	7.18663	0	5.15798	0	9.17664	0	7.18663	Infinity	Infinity
213.1/5.3 (12016)	213.101	5.26	3.67294	0.001	3.46586	0	0	0	4.431	0	3.46586	Infinity	Infinity
625.8/7.1 (62616)	625.842	7.09	3.67007	0.00101	33.364	0	24.4551	0	42.6881	0	33.364	Infinity	Infinity
600.7/5.9 (60033)	600.678	5.85	3.66819	0.00102	18.3142	0	16.1356	0	23.4445	0	18.3142	Infinity	Infinity
244.2/2.2 (14382)	244.166	2.2	3.6614	0.00103	43.3167	0	4.59334	0	55.5536	0	43.3167	Infinity	Infinity
616.3/13.6 (61672)	616.333	13.62	3.66148	0.00103	18.4388	0	11.1854	0	23.6473	0	18.4388	Infinity	Infinity
414.2/4.3 (35761)	414.211	4.32	3.65721	0.00104	23.6198	0	22.5463	0	30.3271	0	23.6198	Infinity	Infinity
620.3/4.2 (62067)	620.261	4.21	3.65611	0.00105	7.37609	0	0	0	9.47353	0	7.37609	Infinity	Infinity
338.1/2.9 (24466)	338.105	2.9	3.65007	0.00106	23.8729	0	0	0	30.7121	0	23.8729	Infinity	Infinity
421.1/2.8 (36685)	421.141	2.8	3.652	0.00106	52.6884	0	3.41714	0	67.7467	0	52.6884	Infinity	Infinity
438.9/1.2 (39266)	438.872	1.18	3.65185	0.00106	35.6678	0	0	0	45.8635	0	35.6678	Infinity	Infinity
748.9/8.7 (71733)	748.907	8.69	3.63635	0.0011	82.4517	0	43.8953	0	106.473	0	82.4517	Infinity	Infinity
290.1/3.3 (18585)	290.1	3.32	3.63483	0.00111	7.57763	0	0	0	9.78933	0	7.57763	Infinity	Infinity
434.1/1.2 (38577)	434.079	1.19	3.63275	0.00111	13.9024	0	4.78188	0	17.9705	0	13.9024	Infinity	Infinity
484.2/3.7 (45617)	484.172	3.7	3.63144	0.00112	2.6366	0	0	0	3.40934	0	2.6366	Infinity	Infinity
607.2/6.6 (60691)	607.213	6.62	3.63086	0.00112	59.019	0	0	0	76.3285	0	59.019	Infinity	Infinity
309.2/2.6 (20439)	309.193	2.62	3.62322	0.00114	8.21933	0	0	0	10.6524	0	8.21933	Infinity	Infinity
657.2/5.3 (65256)	657.238	5.28	3.62401	0.00114	15.8805	0	0	0	20.5769	0	15.8805	Infinity	Infinity
428.2/3.4 (37697)	428.154	3.41	3.61767	0.00116	3.15379	0	0	0	4.09362	0	3.15379	Infinity	Infinity
452.2/9.5 (41162)	452.183	9.47	3.6166	0.00116	42.3966	0	10.5101	0	55.0472	0	42.3966	Infinity	Infinity
634.3/2.8 (63358)	634.344	2.84	3.6033	0.0012	26.9242	0	0	0	35.087	0	26.9242	Infinity	Infinity
271.0/2.9 (16679)	270.979	2.9	3.59661	0.00123	9.1419	0	5.4126	0	11.9357	0	9.1419	Infinity	Infinity
674.9/2.3 (66722)	674.918	2.26	3.59488	0.00123	8.82927	0	0	0	11.5331	0	8.82927	Infinity	Infinity
418.2/3.0 (36344)	418.172	2.97	3.58984	0.00125	4.92532	0	0	0	6.44263	0	4.92532	Infinity	Infinity
578.3/1.1 (57633)	578.275	1.12	3.58435	0.00127	60.1297	0	0	0	78.774	0	60.1297	Infinity	Infinity
390.7/4.4 (32503)	390.665	4.43	3.57328	0.0013	43.5918	0	0	0	57.2851	0	43.5918	Infinity	Infinity
325.2/2.6 (22309)	325.176	2.59	3.55409	0.00137	4.79042	0	3.11523	0	6.32921	0	4.79042	Infinity	Infinity
414.5/3.5 (35813)	414.458	3.53	3.55215	0.00138	5.30646	0	4.57518	0	7.01484	0	5.30646	Infinity	Infinity
527.3/6.6 (51534)	527.322	6.59	3.55035	0.00138	10.3317	0	3.58966	0	13.6649	0	10.3317	Infinity	Infinity
608.3/4.4 (60794)	608.265	4.44	3.55076	0.00138	371.628	0	64.9107	0	491.463	0	371.628	Infinity	Infinity
373.2/4.3 (30103)	373.204	4.25	3.54769	0.00139	41.5549	0	0	0	55.0023	0	41.5549	Infinity	Infinity
680.8/1.2 (67188)	680.787	1.17	3.54705	0.00139	7.65545	0	0	0	10.1346	0	7.65545	Infinity	Infinity
123.1/1.0 (6758)	123.056	1.02	3.54434	0.0014	2.71448	0	0	0	3.59629	0	2.71448	Infinity	Infinity
168.1/3.4 (9357)	168.064	3.38	3.53098	0.00145	4.33085	0	0	0	5.75947	0	4.33085	Infinity	Infinity
403.2/3.9 (34225)	403.154	3.87	3.53146	0.00145	12.3904	0	5.39523	0	16.4753	0	12.3904	Infinity	Infinity
735.3/5.9 (70941)	735.35	5.88	3.53307	0.00145	21.961	0	9.99399	0	29.1879	0	21.961	Infinity	Infinity
614.2/12.4 (61406)	614.243	12.41	3.52468	0.00148	10.4392	0	5.78281	0	13.9076	0	10.4392	Infinity	Infinity
401.2/3.9 (33920)	401.162	3.95	3.5194	0.0015	102.608	0	83.1499	0	136.904	0	102.608	Infinity	Infinity
146.2/3.0 (8007)	146.166	2.96	3.51326	0.00152	4.88229	0	0	0	6.52556	0	4.88229	Infinity	Infinity
615.6/8.1 (61579)	615.62	8.12	3.51379	0.00152	4.53466	0	0	0	6.06	0	4.53466	Infinity	Infinity
564.3/4.5 (56046)	564.276	4.46	3.51022	0.00154	75.7331	0	30.4821	0	101.311	0	75.7331	Infinity	Infinity
279.2/14.0 (17500)	279.174	13.98	3.49099	0.00161	3.18503	0	0	0	4.28419	0	3.18503	Infinity	Infinity
426.1/7.1 (37417)	426.134	7.14	3.47829	0.00167	29.066	0	9.88536	0	39.2395	0	29.066	Infinity	Infinity
393.5/4.0 (32904)	393.524	4	3.47347	0.00169	29.616	0	27.7106	0	40.0375	0	29.616	Infinity	Infinity
485.2/9.4 (45752)	485.159	9.43	3.47096	0.0017	19.2618	0	0	0	26.0586	0	19.2618	Infinity	Infinity
574.9/4.8 (57264)	574.882	4.82	3.47074	0.0017	18.0016	0	0	0	24.3552	0	18.0016	Infinity	Infinity
340.2/4.0 (24851)	340.185	3.98	3.46385	0.00173	4.74898	0	0	0	6.43793	0	4.74898	Infinity	Infinity
446.1/2.8 (40362)	446.125	2.77	3.46115	0.00174	5.12518	0	3.30383	0	6.95334	0	5.12518	Infinity	Infinity
793.5/9.0 (74144)	793.481	8.96	3.46203	0.00174	28.7068	0	19.3826	0	38.9366	0	28.7068	Infinity	Infinity
370.2/2.3 (29676)	370.21	2.26	3.45747	0.00176	34.4395	0	16.6519	0	46.7738	0	34.4395	Infinity	Infinity
593.3/5.6 (59224)	593.283	5.62	3.44887	0.0018	13.6946	0	1.50421	0	18.6456	0	13.6946	Infinity	Infinity
144.1/3.3 (7837)	144.064	3.31	3.44731	0.00181	10.6852	0	0	0	14.5548	0	10.6852	Infinity	Infinity
149.1/8.3 (8249)	149.097	8.33	3.4473	0.00181	2.82252	0	1.03927	0	3.8447	0	2.82252	Infinity	Infinity
186.1/6.9 (10361)	186.089	6.86	3.44711	0.00181	11.5522	0	0	0	15.7368	0	11.5522	Infinity	Infinity
525.2/3.7 (51185)	525.153	3.7	3.43073	0.00189	19.6111	0	0	0	26.8423	0	19.6111	Infinity	Infinity
279.2/14.0 (17495)	279.17	13.98	3.41956	0.00194	8.0024	0	2.92499	0	10.9889	0	8.0024	Infinity	Infinity
596.0/2.2 (59498)	596.045	2.24	3.41329	0.00197	13.1644	0	0	0	18.1105	0	13.1644	Infinity	Infinity
617.3/12.1 (61784)	617.318	12.14	3.41459	0.00197	42.1087	0	0	0	57.9079	0	42.1087	Infinity	Infinity
401.9/1.2 (34060)	401.922	1.23	3.4121	0.00198	10.0618	0	0	0	13.8471	0	10.0618	Infinity	Infinity
655.2/4.5 (65055)	655.225	4.53	3.41242	0.00198	7.34417	0	3.38382	0	10.1061	0	7.34417	Infinity	Infinity
429.1/1.0 (37851)	429.099	1.04	3.40641	0.00201	6.22312	0	0	0	8.57859	0	6.22312	Infinity	Infinity
244.2/2.6 (14374)	244.158	2.6	3.39525	0.00207	12.538	0	0	0	17.3404	0	12.538	Infinity	Infinity
743.8/4.2 (71415)	743.81	4.17	3.39468	0.00207	16.4877	0	6.55304	0	22.8069	0	16.4877	Infinity	Infinity
399.5/4.0 (33695)	399.508	4.02	3.39359	0.00208	5.37281	0	0	0	7.43439	0	5.37281	Infinity	Infinity
403.3/14.0 (34304)	403.259	14	3.39195	0.00209	4.38146	0	4.25753	0	6.06559	0	4.38146	Infinity	Infinity
629.3/13.6 (62926)	629.277	13.61	3.39025	0.00209	3.34497	0	0	0	4.63304	0	3.34497	Infinity	Infinity
212.0/1.9 (11946)	212.021	1.86	3.38894	0.0021	28.0255	0	13.9232	0	38.8324	0	28.0255	Infinity	Infinity
552.2/2.7 (54581)	552.237	2.7	3.38912	0.0021	13.0845	0	0	0	18.1291	0	13.0845	Infinity	Infinity
638.4/1.1 (63710)	638.361	1.09	3.3868	0.00211	20.2608	0	0	0	28.0912	0	20.2608	Infinity	Infinity
752.9/5.8 (71951)	752.858	5.78	3.38568	0.00212	26.7683	0	19.2023	0	37.1261	0	26.7683	Infinity	Infinity
328.9/4.0 (22875)	328.882	4.02	3.38293	0.00213	15.5723	0	9.66211	0	21.6155	0	15.5723	Infinity	Infinity
464.3/5.3 (42871)	464.251	5.29	3.3823	0.00214	30.0748	0	13.3035	0	41.7536	0	30.0748	Infinity	Infinity
205.0/6.5 (11549)	205.049	6.47	3.37266	0.00219	5.706	0	1.94188	0	7.94445	0	5.706	Infinity	Infinity
527.3/7.9 (51509)	527.292	7.92	3.37376	0.00219	10.1705	0	4.671	0	14.1558	0	10.1705	Infinity	Infinity
761.4/7.3 (72436)	761.382	7.28	3.37278	0.00219	20.8332	0	9.04354	0	29.005	0	20.8332	Infinity	Infinity
672.8/4.2 (66575)	672.769	4.2	3.37031	0.0022	10.7202	0	7.35928	0	14.9361	0	10.7202	Infinity	Infinity
699.2/4.2 (68466)	699.212	4.24	3.36536	0.00223	20.8099	0	17.8227	0	29.0364	0	20.8099	Infinity	Infinity
388.9/1.9 (32258)	388.9	1.91	3.34391	0.00236	9.19194	0	0	0	12.9079	0	9.19194	Infinity	Infinity
289.1/6.1 (18503)	289.105	6.13	3.34103	0.00238	21.2477	0	0	0	29.8632	0	21.2477	Infinity	Infinity
610.2/3.2 (61017)	610.22	3.23	3.33615	0.00241	32.3587	0	0	0	45.546	0	32.3587	Infinity	Infinity
439.0/4.2 (39273)	438.987	4.2	3.33274	0.00243	8.70719	0	4.76424	0	12.2682	0	8.70719	Infinity	Infinity
695.4/3.8 (68268)	695.419	3.8	3.32576	0.00247	93.0417	0	91.8328	0	131.368	0	93.0417	Infinity	Infinity
615.9/7.6 (61597)	615.882	7.62	3.3108	0.00257	9.16133	0	6.61172	0	12.9936	0	9.16133	Infinity	Infinity
366.0/4.5 (29041)	366.037	4.49	3.29985	0.00264	40.9317	0	30.212	0	58.2465	0	40.9317	Infinity	Infinity
397.2/2.0 (33351)	397.173	2	3.30035	0.00264	7.92282	0	0	0	11.2726	0	7.92282	Infinity	Infinity
352.1/3.8 (26987)	352.09	3.8	3.29831	0.00265	32.3317	0	8.48753	0	46.0301	0	32.3317	Infinity	Infinity
506.5/6.3 (48682)	506.545	6.32	3.299	0.00265	7.93176	0	3.30122	0	11.2899	0	7.93176	Infinity	Infinity
514.2/2.7 (49741)	514.239	2.69	3.28515	0.00274	28.1918	0	7.23474	0	40.297	0	28.1918	Infinity	Infinity
133.0/3.9 (7304)	133.049	3.85	3.28388	0.00275	10.4376	0	0.944474	0	14.9251	0	10.4376	Infinity	Infinity
691.3/7.3 (67979)	691.344	7.31	3.26654	0.00288	10.1022	0	0	0	14.5222	0	10.1022	Infinity	Infinity
631.2/2.9 (63068)	631.208	2.9	3.26255	0.00291	31.5204	0	6.64134	0	45.3668	0	31.5204	Infinity	Infinity
491.3/3.8 (46658)	491.27	3.79	3.26026	0.00292	28.2314	0	0	0	40.6616	0	28.2314	Infinity	Infinity
362.1/5.5 (28546)	362.11	5.48	3.25766	0.00294	33.2858	0	10.2937	0	47.9796	0	33.2858	Infinity	Infinity
455.9/2.2 (41688)	455.939	2.16	3.25688	0.00295	10.0868	0	2.68193	0	14.543	0	10.0868	Infinity	Infinity
301.2/3.8 (19621)	301.176	3.83	3.2544	0.00297	10.0004	0	0	0	14.4295	0	10.0004	Infinity	Infinity
465.3/6.5 (43037)	465.259	6.5	3.24657	0.00303	5.29471	0	0	0	7.65811	0	5.29471	Infinity	Infinity
795.2/3.7 (74201)	795.211	3.7	3.24402	0.00305	6.56052	0	0	0	9.49639	0	6.56052	Infinity	Infinity
634.3/2.8 (63352)	634.336	2.83	3.23485	0.00312	30.6633	0	0	0	44.5111	0	30.6633	Infinity	Infinity
266.1/3.6 (16269)	266.065	3.56	3.21962	0.00324	2.16988	0	0	0	3.16472	0	2.16988	Infinity	Infinity
419.2/4.1 (36461)	419.17	4.11	3.21801	0.00325	11.2761	0	5.96138	0	16.4541	0	11.2761	Infinity	Infinity
479.2/7.2 (44852)	479.155	7.18	3.20508	0.00336	13.1823	0	0	0	19.3133	0	13.1823	Infinity	Infinity
349.8/4.1 (26548)	349.792	4.14	3.20156	0.00339	36.3011	0	25.5205	0	53.2431	0	36.3011	Infinity	Infinity
620.3/3.8 (62094)	620.301	3.78	3.20179	0.00339	18.4059	0	4.70769	0	26.994	0	18.4059	Infinity	Infinity
209.1/5.0 (11791)	209.128	5	3.1985	0.00342	19.3821	0	0	0	28.455	0	19.3821	Infinity	Infinity
350.9/1.5 (26779)	350.938	1.46	3.17733	0.00361	21.5884	0	0.737858	0	31.9053	0	21.5884	Infinity	Infinity
627.9/1.2 (62812)	627.857	1.22	3.17639	0.00361	12.4318	0	0	0	18.3783	0	12.4318	Infinity	Infinity
577.3/10.9 (57554)	577.325	10.87	3.1696	0.00368	72.3494	0	30.9213	0	107.185	0	72.3494	Infinity	Infinity
373.0/1.2 (30042)	373	1.22	3.16053	0.00376	42.2276	0	0	0	62.7395	0	42.2276	Infinity	Infinity
681.3/5.6 (67217)	681.303	5.55	3.15804	0.00379	66.0765	0	13.4937	0	98.2504	0	66.0765	Infinity	Infinity
509.5/4.2 (49164)	509.538	4.16	3.14276	0.00393	29.6097	0	9.59289	0	44.2411	0	29.6097	Infinity	Infinity
753.0/7.4 (71955)	753.022	7.43	3.13698	0.00399	6.39385	0	0	0	9.57095	0	6.39385	Infinity	Infinity
732.9/7.3 (70794)	732.871	7.28	3.13252	0.00404	10.7959	0	0	0	16.1834	0	10.7959	Infinity	Infinity
728.4/1.1 (70522)	728.447	1.11	3.13165	0.00405	18.0594	0	0	0	27.0791	0	18.0594	Infinity	Infinity
421.2/1.1 (36712)	421.195	1.1	3.12591	0.0041	69.0439	0	0	0	103.718	0	69.0439	Infinity	Infinity
408.0/1.2 (34819)	407.951	1.17	3.12515	0.00411	48.5561	0	0	0	72.9586	0	48.5561	Infinity	Infinity
358.2/4.7 (27981)	358.152	4.72	3.12298	0.00413	83.8136	0	0	0	126.023	0	83.8136	Infinity	Infinity
686.4/4.2 (67605)	686.355	4.16	3.12059	0.00416	12.2009	0	0	0	18.3594	0	12.2009	Infinity	Infinity
748.7/8.7 (71723)	748.73	8.73	3.11654	0.0042	12.9594	0	0	0	19.5261	0	12.9594	Infinity	Infinity
799.3/4.2 (74413)	799.264	4.16	3.11044	0.00427	5.26149	0	0	0	7.94313	0	5.26149	Infinity	Infinity
548.3/8.4 (54096)	548.288	8.37	3.10905	0.00428	5.53609	0	0	0	8.36141	0	5.53609	Infinity	Infinity
181.1/4.3 (10097)	181.133	4.35	3.10568	0.00432	2.00301	0	0	0	3.02852	0	2.00301	Infinity	Infinity
321.8/2.6 (21846)	321.765	2.63	3.10579	0.00432	21.0238	0	9.96091	0	31.7866	0	21.0238	Infinity	Infinity
500.4/3.9 (47915)	500.36	3.9	3.10303	0.00435	30.6117	0	0	0	46.324	0	30.6117	Infinity	Infinity
320.1/3.4 (21610)	320.115	3.41	3.10029	0.00438	16.7057	0	4.992	0	25.3026	0	16.7057	Infinity	Infinity
454.3/4.2 (41485)	454.269	4.16	3.09663	0.00442	26.1492	0	0	0	39.6527	0	26.1492	Infinity	Infinity
384.1/6.2 (31510)	384.109	6.22	3.09511	0.00443	37.2073	0	0	0	56.449	0	37.2073	Infinity	Infinity
667.3/3.1 (66150)	667.256	3.12	3.08917	0.0045	18.5709	0	12.2669	0	28.229	0	18.5709	Infinity	Infinity
267.3/12.6 (16427)	267.266	12.64	3.08633	0.00453	3.81848	0	0	0	5.80968	0	3.81848	Infinity	Infinity
400.2/4.1 (33791)	400.214	4.06	3.08465	0.00455	4.56608	0	0	0	6.95092	0	4.56608	Infinity	Infinity
552.3/14.0 (54624)	552.292	13.95	3.0838	0.00456	14.2332	0	0	0	21.6731	0	14.2332	Infinity	Infinity
577.2/4.5 (57509)	577.229	4.53	3.08278	0.00457	15.9679	0	2.11001	0	24.3226	0	15.9679	Infinity	Infinity
455.2/1.1 (41576)	455.165	1.13	3.08157	0.00459	44.926	0	0	0	68.4589	0	44.926	Infinity	Infinity
423.9/1.2 (37121)	423.941	1.24	3.07845	0.00462	3.60285	0	0	0	5.49563	0	3.60285	Infinity	Infinity
784.9/9.2 (73670)	784.878	9.18	3.07723	0.00464	18.9814	0	0	0	28.9648	0	18.9814	Infinity	Infinity
333.1/2.3 (23566)	333.108	2.25	3.07549	0.00466	6.064	0	0	0	9.25869	0	6.064	Infinity	Infinity
596.3/4.3 (59556)	596.346	4.3	3.07423	0.00467	5.06772	0	0	0	7.74071	0	5.06772	Infinity	Infinity
585.3/1.1 (58351)	585.268	1.1	3.07347	0.00468	70.0238	0	0	0	106.985	0	70.0238	Infinity	Infinity
717.3/8.1 (69760)	717.269	8.09	3.07361	0.00468	12.1063	0	0	0	18.4955	0	12.1063	Infinity	Infinity
379.2/1.1 (30899)	379.198	1.1	3.07285	0.00469	79.2334	0	0	0	121.08	0	79.2334	Infinity	Infinity
525.2/3.4 (51196)	525.183	3.41	3.0723	0.00469	8.38037	0	0	0	12.8086	0	8.38037	Infinity	Infinity
540.3/3.5 (53067)	540.26	3.47	3.0729	0.00469	1.28246	0	0	0	1.95975	0	1.28246	Infinity	Infinity
676.7/5.9 (66865)	676.661	5.92	3.07298	0.00469	8.71578	0	0	0	13.3183	0	8.71578	Infinity	Infinity
409.2/2.7 (35005)	409.197	2.73	3.07091	0.00471	14.7413	0	0	0	22.541	0	14.7413	Infinity	Infinity
229.1/2.5 (13221)	229.125	2.54	3.06893	0.00473	7.45184	0	0	0	11.402	0	7.45184	Infinity	Infinity
335.1/7.4 (23893)	335.106	7.4	3.06849	0.00474	13.0248	0	0	0	19.932	0	13.0248	Infinity	Infinity
168.0/2.2 (9347)	168.029	2.17	3.06647	0.00476	923.193	0	0	0	1413.71	0	923.193	Infinity	Infinity
448.8/4.4 (40701)	448.767	4.36	3.0648	0.00478	27.0356	0	9.31902	0	41.4228	0	27.0356	Infinity	Infinity
200.1/4.4 (11188)	200.092	4.37	3.06208	0.00481	314.217	0	0	0	481.855	0	314.217	Infinity	Infinity
728.4/3.7 (70512)	728.388	3.74	3.06233	0.00481	30.3678	0	0	0	46.5656	0	30.3678	Infinity	Infinity
488.2/4.1 (46219)	488.235	4.14	3.06101	0.00483	12.382	0	8.87672	0	18.9947	0	12.382	Infinity	Infinity
616.3/13.6 (61676)	616.34	13.63	3.05986	0.00484	9.03845	0	0	0	13.8707	0	9.03845	Infinity	Infinity
546.3/1.1 (53818)	546.255	1.14	3.05947	0.00485	69.8529	0	0	0	107.212	0	69.8529	Infinity	Infinity
258.1/3.4 (15505)	258.081	3.4	3.0556	0.00489	2.34733	0	0	0	3.60729	0	2.34733	Infinity	Infinity
230.1/2.7 (13318)	230.081	2.66	3.0526	0.00493	5.08032	0	2.83538	0	7.81493	0	5.08032	Infinity	Infinity
463.8/4.0 (42799)	463.769	4.05	3.05002	0.00496	112.009	0	69.0792	0	172.447	0	112.009	Infinity	Infinity
536.3/13.9 (52623)	536.318	13.92	3.04614	0.00501	30.8993	0	0	0	47.6324	0	30.8993	Infinity	Infinity
653.3/1.1 (64898)	653.267	1.12	3.0447	0.00503	25.1968	0	0	0	38.8603	0	25.1968	Infinity	Infinity
681.4/5.6 (67249)	681.421	5.63	3.04206	0.00506	42.6401	0	0	0	65.8196	0	42.6401	Infinity	Infinity
128.1/2.9 (6933)	128.108	2.86	3.04033	0.00508	14.781	0	0	0	22.829	0	14.781	Infinity	Infinity
435.2/5.8 (38757)	435.208	5.8	3.03852	0.00511	4.65205	0	0	0	7.18929	0	4.65205	Infinity	Infinity
686.3/7.0 (67577)	686.278	7.01	3.03549	0.00514	13.2614	0	0	0	20.5146	0	13.2614	Infinity	Infinity
637.7/8.4 (63642)	637.665	8.37	3.03278	0.00518	24.8695	0	0	0	38.5062	0	24.8695	Infinity	Infinity
337.1/1.0 (24308)	337.148	1.02	3.03211	0.00519	4.75621	0	0	0	7.36582	0	4.75621	Infinity	Infinity
450.7/4.2 (40949)	450.677	4.21	3.03194	0.00519	23.5423	0	19.3072	0	36.4613	0	23.5423	Infinity	Infinity
429.2/1.1 (37865)	429.152	1.12	3.02184	0.00532	1.80519	0	0	0	2.80514	0	1.80519	Infinity	Infinity
645.3/1.1 (64266)	645.318	1.11	3.02007	0.00534	28.8081	0	0	0	44.7921	0	28.8081	Infinity	Infinity
328.1/2.3 (22765)	328.137	2.26	3.01863	0.00536	3.47411	0	0	0	5.40428	0	3.47411	Infinity	Infinity
463.1/6.2 (42702)	463.117	6.23	3.01737	0.00538	50.212	0	0	0	78.1418	0	50.212	Infinity	Infinity
705.3/1.1 (68948)	705.297	1.11	3.01703	0.00539	18.9334	0	0	0	29.4682	0	18.9334	Infinity	Infinity
377.9/4.2 (30696)	377.9	4.16	3.01532	0.00541	2.90823	0	0	0	4.52897	0	2.90823	Infinity	Infinity
197.1/1.0 (10973)	197.086	1	3.00779	0.00551	3.18911	0	0	0	4.97883	0	3.18911	Infinity	Infinity
774.4/6.5 (73159)	774.42	6.54	3.00747	0.00551	3.62928	0	0	0	5.66662	0	3.62928	Infinity	Infinity
427.7/4.9 (37649)	427.68	4.92	3.00738	0.00552	19.8702	0	0	0	31.0254	0	19.8702	Infinity	Infinity
588.0/4.2 (58675)	588.006	4.18	3.00572	0.00554	5.47153	0	0	0	8.54801	0	5.47153	Infinity	Infinity
318.1/4.1 (21353)	318.102	4.14	3.00172	0.00559	9.29467	0	0.376422	0	14.5401	0	9.29467	Infinity	Infinity
270.0/1.3 (16603)	269.993	1.26	2.99817	0.00564	7.87677	0	0	0	12.3366	0	7.87677	Infinity	Infinity
272.2/1.1 (16799)	272.161	1.12	2.99857	0.00564	5.57502	0	0	0	8.73045	0	5.57502	Infinity	Infinity
670.7/6.9 (66441)	670.731	6.92	2.99863	0.00564	21.5986	0	0	0	33.8227	0	21.5986	Infinity	Infinity
367.2/1.0 (29285)	367.233	1.04	2.9976	0.00565	2.01989	0	0	0	3.16416	0	2.01989	Infinity	Infinity
173.1/1.0 (9594)	173.056	1.01	2.99462	0.00569	5.8296	0	0	0	9.14117	0	5.8296	Infinity	Infinity
465.1/6.2 (42957)	465.116	6.22	2.99279	0.00572	27.4789	0	0	0	43.1148	0	27.4789	Infinity	Infinity
674.3/1.1 (66670)	674.311	1.12	2.98978	0.00576	29.3942	0	0	0	46.1665	0	29.3942	Infinity	Infinity
567.2/6.6 (56362)	567.22	6.63	2.97924	0.00591	75.6672	0	0	0	119.263	0	75.6672	Infinity	Infinity
567.2/6.5 (56368)	567.225	6.5	2.97616	0.00596	58.9835	0	0	0	93.0633	0	58.9835	Infinity	Infinity
150.0/1.1 (8268)	150.019	1.1	2.97517	0.00597	192.23	0	0	0	303.398	0	192.23	Infinity	Infinity
336.2/4.9 (24128)	336.192	4.86	2.97359	0.006	16.2954	0	0	0	25.7328	0	16.2954	Infinity	Infinity
266.1/4.2 (16294)	266.139	4.18	2.97178	0.00602	3.67533	0	0	0	5.80743	0	3.67533	Infinity	Infinity
364.2/7.7 (28822)	364.169	7.69	2.97134	0.00603	20.678	0	0	0	32.6783	0	20.678	Infinity	Infinity
764.2/8.0 (72585)	764.153	7.99	2.96962	0.00606	12.9197	0	0	0	20.4294	0	12.9197	Infinity	Infinity
586.3/1.1 (58464)	586.275	1.12	2.96778	0.00608	42.9611	0	0	0	67.9746	0	42.9611	Infinity	Infinity
603.7/3.7 (60352)	603.725	3.68	2.96673	0.0061	26.7005	0	0	0	42.2616	0	26.7005	Infinity	Infinity
484.0/2.3 (45596)	483.987	2.25	2.96622	0.00611	23.0301	0	0	0	36.4585	0	23.0301	Infinity	Infinity
311.2/3.4 (20623)	311.181	3.41	2.96518	0.00612	6.43121	0	0	0	10.1846	0	6.43121	Infinity	Infinity
133.1/3.8 (7305)	133.051	3.81	2.96217	0.00617	3.3091	0	0	0	5.24572	0	3.3091	Infinity	Infinity
346.2/3.9 (25964)	346.181	3.91	2.96075	0.00619	20.5882	0	0	0	32.6528	0	20.5882	Infinity	Infinity
718.3/4.1 (69829)	718.342	4.07	2.95985	0.0062	3.2489	0	0	0	5.15432	0	3.2489	Infinity	Infinity
354.1/2.7 (27396)	354.077	2.73	2.95914	0.00621	2.31475	0	0	0	3.6732	0	2.31475	Infinity	Infinity
558.6/4.1 (55436)	558.558	4.1	2.95491	0.00628	6.20524	0	0	0	9.86095	0	6.20524	Infinity	Infinity
601.8/6.5 (60156)	601.806	6.5	2.95223	0.00632	19.5113	0	7.22425	0	31.0343	0	19.5113	Infinity	Infinity
394.7/3.4 (33027)	394.688	3.45	2.9515	0.00633	18.6754	0	0	0	29.712	0	18.6754	Infinity	Infinity
573.3/5.0 (57072)	573.323	5	2.93408	0.00661	62.5212	0	0	0	100.06	0	62.5212	Infinity	Infinity
596.3/6.0 (59537)	596.296	6.05	2.92073	0.00683	1.83109	0	0	0	2.9439	0	1.83109	Infinity	Infinity
269.0/1.9 (16524)	268.962	1.89	2.91857	0.00686	9.73543	0	1.63364	0	15.6635	0	9.73543	Infinity	Infinity
762.2/3.9 (72474)	762.215	3.9	2.91861	0.00686	39.7521	0	0	0	63.957	0	39.7521	Infinity	Infinity
216.1/2.8 (12255)	216.05	2.79	2.91833	0.00687	13.1048	0	0	0	21.0863	0	13.1048	Infinity	Infinity
527.9/1.2 (51571)	527.893	1.24	2.89953	0.00719	7.07936	0	0	0	11.4649	0	7.07936	Infinity	Infinity
379.3/15.1 (30943)	379.339	15.14	2.88374	0.00747	504.463	0	0	0	821.443	0	504.463	Infinity	Infinity
461.3/7.7 (42526)	461.278	7.68	2.88397	0.00747	9.32706	0	0	0	15.1866	0	9.32706	Infinity	Infinity
728.7/5.7 (70539)	728.704	5.7	2.88277	0.00749	29.8155	0	0	0	48.5663	0	29.8155	Infinity	Infinity
307.1/3.5 (20163)	307.101	3.54	2.88213	0.0075	3.93668	0	0	0	6.41387	0	3.93668	Infinity	Infinity
385.2/4.4 (31692)	385.206	4.4	2.88246	0.0075	9.07617	0	0	0	14.7858	0	9.07617	Infinity	Infinity
553.3/5.6 (54769)	553.334	5.64	2.87654	0.00761	18.2333	0	12.5145	0	29.7645	0	18.2333	Infinity	Infinity
714.7/4.0 (69605)	714.741	4.03	2.87648	0.00761	2.69441	0	0	0	4.39852	0	2.69441	Infinity	Infinity
462.2/4.3 (42598)	462.161	4.25	2.87203	0.00769	53.2967	0	24.9896	0	87.1396	0	53.2967	Infinity	Infinity
716.3/6.2 (69679)	716.274	6.21	2.86521	0.00782	14.9172	0	0	0	24.4475	0	14.9172	Infinity	Infinity
301.1/3.3 (19564)	301.118	3.31	2.86342	0.00785	1.12496	0	0	0	1.84483	0	1.12496	Infinity	Infinity
216.1/1.0 (12278)	216.096	1.05	2.85963	0.00793	0.975402	0	0	0	1.60169	0	0.975402	Infinity	Infinity
154.0/1.3 (8439)	153.999	1.26	2.85452	0.00802	64.7918	0	0	0	106.584	0	64.7918	Infinity	Infinity
586.3/12.8 (58474)	586.292	12.84	2.84863	0.00814	5.42041	0	0	0	8.9351	0	5.42041	Infinity	Infinity
628.3/6.5 (62844)	628.304	6.54	2.84555	0.0082	2.27397	0	0	0	3.75252	0	2.27397	Infinity	Infinity
209.1/8.6 (11746)	209.057	8.64	2.84467	0.00822	2.37004	0	0	0	3.91225	0	2.37004	Infinity	Infinity
582.3/5.9 (58101)	582.339	5.88	2.8348	0.00842	4.22246	0	0	0	6.99434	0	4.22246	Infinity	Infinity
390.7/4.5 (32505)	390.671	4.45	2.8344	0.00843	43.2189	0	0	0	71.6007	0	43.2189	Infinity	Infinity
149.0/3.3 (8214)	149.026	3.33	2.83227	0.00847	2.34379	0	0	0	3.88586	0	2.34379	Infinity	Infinity
659.4/4.9 (65553)	659.356	4.9	2.82877	0.00854	13.4588	0	0	0	22.3415	0	13.4588	Infinity	Infinity
263.2/15.3 (16067)	263.237	15.29	2.82005	0.00872	7.44617	0	3.5042	0	12.3988	0	7.44617	Infinity	Infinity
366.0/4.2 (29040)	366.036	4.24	2.81649	0.0088	34.2437	0	22.5259	0	57.0922	0	34.2437	Infinity	Infinity
258.1/3.3 (15503)	258.077	3.35	2.81077	0.00892	2.17495	0	0	0	3.63353	0	2.17495	Infinity	Infinity
118.1/1.8 (6457)	118.087	1.84	2.80691	0.009	2.25443	0	0	0	3.77149	0	2.25443	Infinity	Infinity
564.2/1.1 (56024)	564.235	1.12	2.80169	0.00912	15.7772	0	0	0	26.4432	0	15.7772	Infinity	Infinity
784.5/4.3 (73646)	784.457	4.32	2.79786	0.0092	14.8929	0	5.16355	0	24.9952	0	14.8929	Infinity	Infinity
416.1/3.6 (36036)	416.095	3.57	2.79473	0.00927	6.47036	0	0	0	10.8716	0	6.47036	Infinity	Infinity
603.3/12.9 (60319)	603.32	12.88	2.78873	0.00941	2.48397	0	0	0	4.18259	0	2.48397	Infinity	Infinity
471.3/3.4 (43888)	471.276	3.42	2.78752	0.00943	2.05614	0	0	0	3.46369	0	2.05614	Infinity	Infinity
279.1/9.3 (17362)	279.085	9.33	2.787	0.00945	4.51652	0	0	0	7.60978	0	4.51652	Infinity	Infinity
291.0/1.4 (18657)	291.011	1.41	2.78159	0.00957	14.7927	0	4.38666	0	24.9723	0	14.7927	Infinity	Infinity
309.3/15.2 (20456)	309.26	15.15	2.77966	0.00961	5.02959	0	0	0	8.4966	0	5.02959	Infinity	Infinity
244.2/3.0 (14384)	244.167	3.01	2.77896	0.00963	60.8413	0	0	0	102.806	0	60.8413	Infinity	Infinity
281.2/4.3 (17730)	281.174	4.31	2.77643	0.00969	6.79983	0	2.10221	0	11.5005	0	6.79983	Infinity	Infinity
163.0/1.5 (9039)	162.972	1.52	2.77454	0.00973	1.60184	0	0	0	2.71102	0	1.60184	Infinity	Infinity
407.2/5.8 (34712)	407.183	5.81	2.77424	0.00974	11.2737	0	2.3872	0	19.0822	0	11.2737	Infinity	Infinity
263.1/9.5 (16013)	263.122	9.48	2.77341	0.00976	13.9129	0	3.36855	0	23.5564	0	13.9129	Infinity	Infinity
338.1/3.3 (24498)	338.138	3.31	2.77358	0.00976	4.93181	0	0	0	8.34968	0	4.93181	Infinity	Infinity
440.2/4.3 (39454)	440.17	4.28	2.77322	0.00976	3.40277	0	0	0	5.76172	0	3.40277	Infinity	Infinity
509.2/4.7 (49082)	509.219	4.72	2.77193	0.00979	6.47341	0	0	0	10.9662	0	6.47341	Infinity	Infinity
392.2/6.5 (32681)	392.162	6.48	2.77165	0.0098	4.54724	0	0	0	7.70396	0	4.54724	Infinity	Infinity
425.2/10.1 (37292)	425.169	10.07	2.77158	0.0098	2.46695	0	0	0	4.17962	0	2.46695	Infinity	Infinity
562.3/4.2 (55860)	562.291	4.16	2.76811	0.00988	5.0696	0	0	0	8.59992	0	5.0696	Infinity	Infinity
711.4/5.0 (69401)	711.403	5	9.30365	4.6199e-10	944.079	0.010579	874.609	0	476.491	0.048479	944.068	89241	4.95056
349.1/4.3 (26430)	349.126	4.28	11.9021	1.8068e-12	5925.88	0.153563	5947.75	0	2337.87	0.535934	5925.72	38589.2	4.58647
538.3/14.0 (52866)	538.326	13.98	14.4622	1.6204e-14	2137.91	0.0573205	1911.87	0	694.141	0.262676	2137.85	37297.4	4.57168
655.2/3.8 (65054)	655.221	3.84	5.18132	1.6895e-05	553.532	0.0190146	628.265	0	501.639	0.0871358	553.513	29110.9	4.46406
656.3/6.4 (65143)	656.273	6.42	6.22035	1.0136e-06	240.199	0.00919632	294.03	0	181.319	0.0421428	240.19	26119.1	4.41696
516.3/14.0 (50104)	516.344	14	11.5071	3.9812e-12	2262.11	0.088172	1966.14	0	923.076	0.404055	2262.03	25655.7	4.40918
349.1/4.9 (26428)	349.125	4.88	9.443	3.3583e-10	158.954	0.0096846	178.396	0	79.0385	0.0443804	158.944	16413	4.21519
682.4/6.6 (67311)	682.376	6.56	11.2561	6.6375e-12	420.204	0.0309859	366.264	0	175.284	0.141995	420.173	13561.1	4.1323
412.4/12.6 (35509)	412.43	12.61	5.14899	1.8455e-05	1482	0.195406	1401.43	0	1351.36	0.895461	1481.8	7584.21	3.87991
162.0/1.3 (8928)	161.97	1.35	4.62544	7.7186e-05	20.0732	0.00278055	19.7229	0	20.3754	0.0127421	20.0704	7219.13	3.85848
227.1/8.0 (12995)	227.126	7.99	6.75863	2.439e-07	25.0618	0.00360167	26.1615	0	17.4099	0.0165049	25.0582	6958.39	3.84251
711.4/4.8 (69402)	711.406	4.76	7.43487	4.2584e-08	276.842	0.0495592	337.371	0	174.817	0.227109	276.792	5586.09	3.74711
528.3/14.5 (51680)	528.347	14.51	9.87322	1.2747e-10	303.75	0.0555511	244.171	0	144.438	0.254567	303.695	5467.94	3.73782
459.2/5.3 (42177)	459.195	5.34	5.92536	2.2375e-06	2263.03	0.485866	2909.33	0	1793.02	2.22652	2262.55	4657.73	3.66817
645.2/4.9 (64242)	645.242	4.85	4.18993	0.00025	46.0529	0.00990443	25.0864	0	51.6013	0.0453878	46.043	4649.73	3.66743
415.3/5.7 (35989)	415.291	5.67	13.4754	9.2154e-14	1020.57	0.240476	1003.05	0	355.545	1.102	1020.33	4243.95	3.62777
582.3/15.0 (58098)	582.331	15.03	10.8798	1.4492e-11	363.2	0.085849	277.518	0	156.72	0.393409	363.114	4230.68	3.62641
646.4/4.4 (64383)	646.376	4.4	5.64368	4.7941e-06	620.62	0.159461	554.786	0	516.244	0.730744	620.46	3891.97	3.59017
630.3/8.4 (63030)	630.335	8.4	18.3392	3.8905e-17	169.166	0.0517133	166.116	0	43.3	0.23698	169.114	3271.22	3.51471
589.4/14.0 (58846)	589.431	14.01	6.12888	1.2947e-06	22.9711	0.00727926	28.4181	0	17.594	0.0333578	22.9638	3155.69	3.49909
487.3/3.6 (46134)	487.323	3.61	6.94847	1.4864e-07	549.991	0.192864	432.028	0	371.549	0.883814	549.798	2851.7	3.4551
388.0/1.2 (32121)	387.964	1.18	5.64209	4.8148e-06	1017.45	0.371549	1037.28	0	846.479	1.70265	1017.08	2738.39	3.4375
603.4/14.0 (60338)	603.354	14.02	8.15447	7.0689e-09	410.395	0.155401	326.426	0	236.233	0.712137	410.24	2640.88	3.42175
780.3/4.5 (73451)	780.299	4.46	3.08095	0.00459	18.1876	0.00901374	0	0	27.7064	0.0413062	18.1786	2017.77	3.30487
608.2/4.2 (60786)	608.249	4.24	3.28486	0.00274	109.53	0.0560643	68.5331	0	156.494	0.256919	109.474	1953.66	3.29085
715.3/4.4 (69622)	715.295	4.4	5.05818	2.3654e-05	352.133	0.186967	271.379	0	326.725	0.856789	351.946	1883.4	3.27494
309.2/3.9 (20417)	309.153	3.94	2.85165	0.00808	3.08099	0.00166072	0	0	5.07064	0.00761039	3.07933	1855.21	3.26839
614.4/15.4 (61453)	614.356	15.42	7.74361	1.955e-08	288.312	0.166918	193.542	0	174.73	0.536276	288.145	1727.27	3.23736
504.3/14.0 (48427)	504.34	14.01	6.925	1.5798e-07	120.584	0.0710321	125.623	0	81.7165	0.32551	120.513	1697.6	3.22984
728.4/3.9 (70515)	728.393	3.87	5.32	1.1569e-05	95.0527	0.0563801	97.5082	0	83.8483	0.258366	94.9963	1685.92	3.22684
268.1/5.0 (16456)	268.079	4.99	6.40338	6.225e-07	187.826	0.123453	183.137	0	137.644	0.565735	187.703	1521.44	3.18225
335.1/4.7 (23905)	335.108	4.74	3.12814	0.00408	16245.4	10.7605	0	0	24370.2	49.0097	16234.6	1509.73	3.1789
379.7/6.4 (30950)	379.665	6.39	6.90639	1.6582e-07	35.5102	0.0236483	26.8413	0	24.1272	0.10837	35.4866	1501.6	3.17655
339.1/4.2 (24673)	339.141	4.21	3.25615	0.00295	109.582	0.0742058	77.9204	0	157.922	0.340054	109.507	1476.73	3.1693
438.1/4.4 (39152)	438.132	4.37	4.56388	9.1297e-05	113.385	0.0777584	87.6206	0	116.579	0.356334	113.307	1458.16	3.16381
489.9/1.2 (46457)	489.944	1.2	4.85557	4.1164e-05	79.9909	0.0558746	113.276	0	77.3028	0.25605	79.9351	1431.62	3.15583
745.4/4.2 (71514)	745.395	4.23	5.5517	6.1547e-06	57.612	0.0418285	43.6901	0	48.6931	0.191682	57.5702	1377.34	3.13904
466.3/6.2 (43176)	466.281	6.24	4.42447	0.00013	61.1063	0.0450149	41.8266	0	64.8043	0.206284	61.0613	1357.47	3.13273
551.8/5.3 (54544)	551.848	5.27	9.774	1.5903e-10	223.828	0.166764	243.648	0	107.447	0.76421	223.662	1342.18	3.12781
417.3/4.4 (36289)	417.27	4.39	5.39377	9.461e-06	445.899	0.356259	392.106	0	387.875	1.63258	445.543	1251.61	3.09747
100.1/2.7 (5732)	100.077	2.69	3.85283	0.00062	499.795	0.404037	0	0	608.644	1.29134	499.391	1237	3.09237
727.4/4.5 (70446)	727.386	4.46	8.20083	6.311e-09	315.214	0.255917	247.54	0	180.334	1.17276	314.958	1231.71	3.09051
391.2/3.0 (32606)	391.233	3.03	6.31239	7.9293e-07	536.636	0.444896	456.306	0	398.856	2.03877	536.191	1206.21	3.08142
583.3/12.4 (58179)	583.311	12.37	9.41877	3.5491e-10	753.873	0.630756	549.719	0	375.519	1.81214	753.242	1195.19	3.07744
649.4/5.9 (64626)	649.372	5.88	6.42486	5.8799e-07	53.9781	0.0454822	53.9814	0	39.4163	0.208426	53.9326	1186.79	3.07438
698.2/5.2 (68387)	698.229	5.23	6.50207	4.7922e-07	113.094	0.0996366	107.791	0	81.6004	0.456592	112.994	1135.06	3.05502
559.3/6.1 (55526)	559.345	6.08	18.0568	5.8138e-17	225.783	0.199421	244.284	0	58.6459	0.913862	225.583	1132.19	3.05392
228.1/4.6 (13086)	228.088	4.58	8.85669	1.3075e-09	72.4691	0.0681758	61.3831	0	38.3832	0.312421	72.401	1062.97	3.02652
551.8/5.3 (54536)	551.789	5.27	5.61473	5.186e-06	609.631	0.592188	485.06	0	509.342	2.24525	609.039	1029.46	3.01261
548.3/5.8 (54112)	548.31	5.82	11.625	3.1386e-12	54.3279	0.0549219	49.173	0	21.9191	0.251684	54.273	989.184	2.99528
252.0/3.4 (15031)	252.037	3.36	3.58626	0.00126	59.9552	0.0617299	0	0	78.4215	0.282882	59.8935	971.252	2.98733
477.2/4.4 (44593)	477.2	4.4	5.98641	1.8982e-06	481.57	0.496958	397.378	0	377.336	2.27735	481.073	969.036	2.98634
351.1/5.2 (26800)	351.101	5.19	5.07952	2.2314e-05	60.2664	0.0632972	56.3249	0	55.6526	0.290064	60.2031	952.118	2.97869
373.2/2.9 (30136)	373.245	2.9	16.1573	1.0034e-15	2082.19	2.20373	2193.18	0	604.43	5.84626	2079.99	944.849	2.97536
419.2/5.3 (36490)	419.202	5.34	6.6816	2.9851e-07	3820.22	4.17018	4534.8	0	2681.84	8.71642	3816.05	916.081	2.96193
557.3/3.7 (55289)	557.333	3.72	4.58711	8.5695e-05	507.185	0.555623	540.387	0	518.619	1.88305	506.629	912.821	2.96039
320.1/3.5 (21612)	320.118	3.54	5.87289	2.5777e-06	493.356	0.548006	297.181	0	394.021	1.71954	492.808	900.274	2.95437
556.2/3.9 (55064)	556.185	3.95	7.19254	7.9104e-08	87.6372	0.107895	102.784	0	57.1407	0.428514	87.5293	812.249	2.90969
424.2/5.8 (37141)	424.154	5.84	12.264	8.9002e-13	64.3512	0.0801081	50.7213	0	24.6018	0.367101	64.2711	803.304	2.90488
247.1/4.2 (14685)	247.144	4.2	4.22394	0.00023	33.2899	0.0440237	29.837	0	36.9579	0.201742	33.2459	756.18	2.87863
701.8/5.0 (68722)	701.838	5.01	11.0466	1.023e-11	162.464	0.217169	157.074	0	68.9559	0.831673	162.247	748.1	2.87396
580.3/4.9 (57891)	580.327	4.91	7.0327	1.1947e-07	497.292	0.670167	430.523	0	331.559	3.07109	496.622	742.042	2.87043
716.3/6.4 (69678)	716.273	6.36	4.54147	9.7049e-05	44.2304	0.060974	49.3533	0	45.6678	0.279418	44.1694	725.397	2.86058
444.2/4.0 (40050)	444.176	4.02	7.64836	2.4826e-08	345.863	0.488878	289.072	0	212.015	2.24032	345.374	707.463	2.8497
658.3/4.1 (65388)	658.279	4.09	4.5927	8.4396e-05	92.9702	0.132792	110.158	0	94.9154	0.608531	92.8374	700.117	2.84517
454.2/5.2 (41467)	454.236	5.23	3.42492	0.00192	53.3727	0.0767395	18.0749	0	73.0693	0.351665	53.2959	695.504	2.8423
451.7/6.2 (41109)	451.738	6.2	4.96097	3.0857e-05	42.4472	0.0615165	33.2493	0	40.1172	0.281904	42.3857	690.013	2.83886
246.1/4.4 (14565)	246.098	4.37	3.05111	0.00495	144.768	0.209895	0	0	222.473	0.961858	144.558	689.716	2.83867
440.0/1.2 (39423)	439.981	1.21	5.03719	2.5052e-05	34.4559	0.050481	47.2382	0	32.0711	0.231333	34.4054	682.552	2.83414
655.2/1.1 (65056)	655.225	1.11	10.4291	3.7766e-11	168.234	0.24731	202.633	0	75.6157	1.13332	167.987	680.257	2.83267
654.4/6.1 (65011)	654.383	6.14	14.3345	2.0186e-14	71.3856	0.113275	77.748	0	23.3419	0.32592	71.2723	630.196	2.79948
523.2/3.9 (50926)	523.178	3.85	4.26449	0.00021	392.977	0.625004	368.28	0	432.014	2.26919	392.352	628.76	2.79848
347.1/8.0 (26078)	347.104	8	23.8332	3.8974e-20	72.8647	0.117355	68.5747	0	14.3209	0.374215	72.7474	620.892	2.79302
394.7/4.4 (33033)	394.709	4.4	3.10107	0.00437	276.672	0.448728	136.422	0	418.254	2.05633	276.223	616.57	2.78998
399.7/4.3 (33715)	399.722	4.33	6.94794	1.4884e-07	67.7051	0.111602	64.5765	0	45.6757	0.511427	67.5935	606.663	2.78295
488.3/14.0 (46294)	488.346	14	3.60748	0.00119	19.6877	0.0334257	0	0	25.5821	0.153176	19.6542	588.998	2.77011
409.2/3.5 (35019)	409.217	3.52	3.2096	0.00332	152.25	0.263596	27.9615	0	222.353	1.20795	151.986	577.588	2.76162
471.3/5.0 (43892)	471.281	4.96	3.36041	0.00226	34.0562	0.0648413	21.849	0	47.4963	0.29714	33.9914	525.225	2.72034
556.3/6.4 (55138)	556.313	6.38	11.1684	7.9515e-12	187.788	0.363265	162.929	0	78.7776	1.25737	187.424	516.944	2.71344
545.3/3.6 (53748)	545.328	3.57	3.40059	0.00204	49.423	0.0979403	27.6925	0	68.1074	0.448819	49.3251	504.624	2.70297
431.1/5.9 (38202)	431.135	5.85	15.1115	5.4226e-15	153.824	0.305928	156.44	0	47.677	1.02068	153.518	502.812	2.70141
399.7/4.6 (33714)	399.722	4.64	5.87673	2.5511e-06	221.827	0.470901	163.241	0	176.858	1.41261	221.356	471.069	2.67308
771.3/5.3 (72961)	771.317	5.29	2.82381	0.00864	35.0746	0.0760807	0	0	58.1967	0.348646	34.9985	461.018	2.66372
552.2/4.9 (54576)	552.201	4.88	4.80223	4.7626e-05	80.1345	0.17539	69.3796	0	78.1757	0.803736	79.9591	456.894	2.65982
523.2/3.7 (50929)	523.182	3.72	2.98148	0.00588	180.145	0.398495	0	0	283.08	1.82613	179.746	452.063	2.6552
390.2/1.1 (32450)	390.198	1.12	3.07438	0.00467	246.879	0.556413	0	0	376.206	2.54981	246.323	443.698	2.64709
574.2/3.7 (57138)	574.197	3.65	6.81677	2.0948e-07	46.7706	0.106885	47.8829	0	32.1394	0.358123	46.6637	437.579	2.64106
475.3/6.9 (44423)	475.291	6.87	6.9596	1.444e-07	493.746	1.15604	375.705	0	332.307	3.65327	492.59	427.099	2.63053
463.8/2.8 (42805)	463.828	2.85	5.45317	8.0474e-06	147.744	0.349065	158.912	0	126.897	1.59961	147.394	423.256	2.6266
530.4/14.6 (51964)	530.355	14.59	3.311	0.00257	21.0037	0.0505474	7.88824	0	29.7141	0.221075	20.9531	415.524	2.6186
513.3/1.1 (49643)	513.302	1.13	3.41494	0.00197	22.3243	0.0542212	0	0	30.6201	0.248473	22.27	411.726	2.61461
374.2/4.8 (30238)	374.172	4.78	3.05184	0.00494	32.797	0.0866	18.0053	0	50.3261	0.396851	32.7104	378.718	2.57832
392.3/7.6 (32764)	392.254	7.56	9.69956	1.8791e-10	75.131	0.198433	68.6616	0	36.2478	0.909336	74.9325	378.621	2.5782
771.3/5.2 (72958)	771.308	5.24	3.70039	0.00093	63.6949	0.169002	0	0	80.6081	0.586787	63.5259	376.888	2.57621
387.2/6.1 (32036)	387.225	6.13	6.50534	4.7509e-07	26.5739	0.0705746	25.0934	0	19.124	0.323413	26.5033	376.536	2.57581
780.3/4.8 (73454)	780.325	4.78	4.11272	0.00031	80.166	0.212952	75.4395	0	91.2742	0.975869	79.953	376.451	2.57571
560.3/6.9 (55620)	560.293	6.88	9.1569	6.482e-10	94.3025	0.253217	98.3345	0	48.1944	1.16039	94.0493	372.417	2.57103
420.3/4.3 (36630)	420.253	4.34	9.55711	2.5912e-10	180.448	0.50225	164.611	0	88.3453	2.19579	179.945	359.278	2.55543
387.3/4.0 (32067)	387.271	3.98	6.00137	1.8233e-06	45.8236	0.127729	49.3429	0	35.7425	0.585329	45.6959	358.756	2.5548
532.8/4.1 (52219)	532.759	4.14	3.67672	0.00099	43.4399	0.122085	37.9814	0	55.3165	0.559465	43.3178	355.816	2.55123
328.1/4.0 (22750)	328.114	4.02	4.86094	4.0564e-05	80.77	0.227573	78.818	0	77.7994	0.600099	80.5424	354.919	2.55013
268.1/4.4 (16457)	268.08	4.37	6.97271	1.3957e-07	150.714	0.431977	167.65	0	101.196	0.954063	150.282	348.894	2.54269
350.2/6.2 (26678)	350.208	6.24	15.6074	2.4091e-15	164.984	0.486027	175.099	0	49.3664	2.22725	164.498	339.454	2.53078
626.2/6.3 (62626)	626.201	6.28	2.88775	0.0074	19.9994	0.0604514	0	0	32.4195	0.277023	19.9389	330.834	2.51961
450.2/7.6 (40905)	450.229	7.55	4.50545	0.00011	105.992	0.322182	127.489	0	110.119	1.07913	105.67	328.982	2.51717
780.3/4.5 (73453)	780.313	4.47	4.0755	0.00034	41.5905	0.126737	17.7155	0	47.7653	0.580784	41.4638	328.163	2.51609
410.2/4.8 (35176)	410.194	4.77	4.8276	4.4435e-05	76.5034	0.233188	52.2769	0	74.1679	1.0686	76.2702	328.076	2.51598
720.4/6.6 (69996)	720.393	6.56	6.30131	8.1669e-07	56.4054	0.173864	38.9711	0	41.8849	0.796745	56.2315	324.423	2.51111
506.3/3.2 (48657)	506.28	3.16	5.32587	1.1386e-05	175.073	0.544092	124.394	0	153.829	2.49334	174.528	321.77	2.50755
613.3/13.7 (61337)	613.289	13.67	5.76989	3.4052e-06	36.4452	0.114373	45.0306	0	29.5558	0.524123	36.3309	318.652	2.50332
225.1/3.4 (12810)	225.089	3.43	5.58967	5.5514e-06	34.933	0.119093	43.4272	0	29.2336	0.545751	34.8139	293.326	2.46735
758.3/6.4 (72221)	758.32	6.39	6.28868	8.4463e-07	163.358	0.558569	149.781	0	121.527	1.82011	162.799	292.457	2.46606
635.4/14.8 (63467)	635.38	14.8	5.31496	1.173e-05	84.3599	0.288865	53.1645	0	74.262	0.923691	84.071	292.039	2.46544
594.2/6.3 (59315)	594.223	6.29	9.3253	4.3958e-10	35.4084	0.124757	36.6538	0	17.744	0.571707	35.2837	283.82	2.45304
601.4/5.7 (60110)	601.354	5.73	4.5435	9.6513e-05	35.8413	0.12636	28.2891	0	36.9003	0.579054	35.7149	283.644	2.45277
606.3/6.7 (60626)	606.314	6.73	12.4805	5.8675e-13	83.6453	0.297514	81.5123	0	31.2852	1.36338	83.3478	281.148	2.44893
252.0/3.4 (15026)	252.034	3.41	4.88671	3.7803e-05	47.6991	0.174684	78.664	0	45.6586	0.558753	47.5244	273.059	2.43626
200.1/4.6 (11185)	200.091	4.56	4.7767	5.1066e-05	160.219	0.588974	203.44	0	156.904	1.57765	159.63	272.03	2.43462
350.2/3.4 (26650)	350.177	3.4	8.54718	2.7289e-09	288.849	1.0629	253.157	0	158.015	3.40231	287.786	271.754	2.43418
338.2/3.9 (24527)	338.171	3.9	4.15148	0.00028	28.4755	0.10554	14.2428	0	32.0802	0.483644	28.37	269.808	2.43105
496.5/13.5 (47385)	496.523	13.53	5.81844	2.9861e-06	224.583	0.832792	120.309	0	180.538	2.36281	223.75	269.675	2.43084
364.2/4.5 (28853)	364.198	4.46	5.17183	1.7339e-05	40.5326	0.151173	35.456	0	36.6478	0.692762	40.3814	268.12	2.42833
608.3/3.9 (60795)	608.265	3.86	3.00138	0.0056	78.4652	0.296098	0	0	122.279	1.35689	78.1691	264.997	2.42324
630.3/6.2 (63002)	630.277	6.19	20.0312	3.8943e-18	255.946	0.994499	278.902	0	59.5592	3.14301	254.951	257.361	2.41054
640.4/5.2 (63841)	640.365	5.2	2.79556	0.00925	57.2751	0.225005	0	0	95.814	1.0311	57.0501	254.55	2.40577
246.1/5.0 (14563)	246.097	4.96	10.1621	6.7415e-11	537.561	2.13409	478.727	0	247.288	4.97557	535.427	251.892	2.40121
100.1/2.8 (5725)	100.076	2.81	3.65944	0.00104	535.009	2.13622	0	0	683.711	5.87552	532.873	250.447	2.39872
502.3/4.0 (48125)	502.263	3.96	4.81439	4.6068e-05	30.9801	0.124167	30.7279	0	30.0821	0.569007	30.856	249.503	2.39708
445.3/7.2 (40310)	445.301	7.23	16.5301	5.6174e-16	809.832	3.28586	788.626	0	228.829	7.2677	806.546	246.46	2.39175
323.7/4.4 (22104)	323.692	4.4	6.14848	1.2285e-06	105.502	0.431348	77.3377	0	80.2075	1.54762	105.07	244.586	2.38843
651.3/4.3 (64738)	651.276	4.32	4.36331	0.00016	65.2578	0.266945	51.6461	0	69.9156	1.2233	64.9909	244.462	2.38821
481.2/5.8 (45156)	481.212	5.8	11.084	9.4661e-12	371.57	1.52547	315.622	0	156.379	6.9906	370.045	243.577	2.38664
728.3/4.0 (70482)	728.285	4	9.004	9.2525e-10	76.6038	0.320294	69.6295	0	39.7568	0.915284	76.2835	239.167	2.3787
415.3/6.4 (35991)	415.294	6.41	10.5514	2.9047e-11	915.787	3.83533	795.683	0	405.637	8.30185	911.952	238.777	2.37799
709.4/5.7 (69281)	709.362	5.73	4.99898	2.7811e-05	726.988	3.06074	630.696	0	679.917	7.24213	723.927	237.52	2.3757
425.3/5.8 (37362)	425.276	5.81	17.2837	1.7957e-16	4576.22	19.4269	4105.98	6.58653	1237.1	30.1971	4556.79	235.561	2.3721
386.0/1.2 (31806)	385.965	1.17	4.87327	3.9219e-05	105.73	0.472466	161.876	0	101.396	1.49412	105.257	223.783	2.34983
309.2/2.9 (20438)	309.19	2.93	7.89187	1.3509e-08	18.7035	0.0863384	18.859	0	11.0597	0.395652	18.6171	216.63	2.33572
586.2/3.6 (58444)	586.194	3.64	4.48545	0.00011	28.635	0.136177	23.5883	0	29.8186	0.624039	28.4988	210.278	2.32279
320.1/3.1 (21613)	320.118	3.08	3.3482	0.00233	135.573	0.64493	27.0255	0	189.195	2.35162	134.928	210.213	2.32266
737.3/6.2 (71038)	737.308	6.23	3.65157	0.00106	30.114	0.143841	1.5134	0	38.5313	0.523142	29.9702	209.357	2.32089
146.1/2.9 (8001)	146.117	2.89	29.886	8.7134e-23	110.516	0.533473	106.178	0	17.1862	1.14081	109.982	207.162	2.31631
398.5/4.5 (33541)	398.524	4.47	5.33222	1.119e-05	41.3318	0.199826	29.2922	0	36.1934	0.915718	41.132	206.839	2.31563
575.3/1.1 (57301)	575.277	1.1	3.8071	0.0007	88.2935	0.430168	0	0	108.327	1.97128	87.8633	205.254	2.31229
147.1/3.6 (8094)	147.114	3.64	2.76584	0.00994	2.93022	0.0143507	0	0	4.94936	0.065763	2.91586	204.187	2.31003
537.3/5.8 (52736)	537.326	5.82	7.31219	5.8213e-08	18.0532	0.0886197	18.4255	0	11.5186	0.406106	17.9646	203.716	2.30902
503.3/13.7 (48297)	503.332	13.69	12.4308	6.4527e-13	58.397	0.287677	61.9532	0	21.8997	0.946631	58.1093	202.995	2.30749
261.1/5.6 (15807)	261.122	5.64	9.13155	6.8745e-10	61.3197	0.302191	71.7801	0	31.3543	0.758724	61.0175	202.917	2.30732
214.1/4.4 (12099)	214.086	4.37	6.88851	1.7373e-07	43.2705	0.217435	33.6702	0	29.3278	0.694371	43.053	199.004	2.29886
697.2/4.3 (68327)	697.243	4.3	6.25675	9.1974e-07	68.3909	0.34969	67.8628	0	51.0202	1.35996	68.0412	195.576	2.29131
628.4/4.7 (62874)	628.366	4.65	6.97591	1.3841e-07	60.9108	0.315005	64.8753	0	40.7588	0.996932	60.5958	193.365	2.28638
336.2/4.2 (24127)	336.192	4.2	4.21886	0.00023	377.399	1.95333	274.263	0	417.829	4.29323	375.446	193.208	2.28602
615.3/4.5 (61543)	615.334	4.46	9.23313	5.4345e-10	168.871	0.874471	151.672	0	85.3213	2.83473	167.997	193.112	2.28581
387.3/4.2 (32069)	387.273	4.24	2.96867	0.00607	44.399	0.236144	0	0	69.8345	1.08215	44.1629	188.016	2.2742
114.1/1.4 (6138)	114.054	1.44	5.57005	5.8554e-06	13.5076	0.0725912	15.5325	0	11.3204	0.229553	13.435	186.078	2.26969
601.2/3.9 (60071)	601.24	3.93	3.07332	0.00468	61.5493	0.336644	38.955	0	93.4953	1.5427	61.2127	182.832	2.26205
339.2/3.7 (24737)	339.202	3.72	4.52099	0.0001	77.9058	0.427283	67.289	0	80.4525	1.15833	77.4785	182.329	2.26085
333.2/4.9 (23593)	333.153	4.95	3.6629	0.00103	14.7394	0.0810454	7.20112	0	18.7824	0.371397	14.6583	181.866	2.25975
488.3/1.1 (46237)	488.254	1.14	3.62919	0.00112	152.129	0.840902	15.5846	0	195.717	2.24381	151.288	180.912	2.25747
187.1/6.2 (10417)	187.061	6.17	6.31992	7.7717e-07	8.70775	0.0482248	12.1061	0	6.42459	0.220994	8.65953	180.566	2.25664
520.3/5.3 (50597)	520.281	5.29	2.79175	0.00934	89.076	0.500658	0	0	148.94	2.2943	88.5754	177.918	2.25022
423.2/5.7 (37018)	423.237	5.69	5.46933	7.7009e-06	92.6078	0.523301	103.219	0	78.9689	2.39807	92.0845	176.968	2.2479
325.1/8.0 (22275)	325.121	8.01	19.5052	7.8177e-18	77.8058	0.474591	78.538	0	18.3343	2.04414	77.3312	163.943	2.21469
136.1/2.3 (7426)	136.076	2.33	3.19017	0.00349	13.5357	0.0848701	0	0	19.7893	0.388924	13.4509	159.487	2.20273
589.2/4.7 (58777)	589.215	4.71	2.77908	0.00963	10.7317	0.0684378	0	0	18.0107	0.313621	10.6633	156.81	2.19537
329.2/3.3 (22983)	329.201	3.32	7.42592	4.3564e-08	55.1574	0.351948	65.1536	0	34.6106	1.12131	54.8054	156.72	2.19513
199.1/5.6 (11137)	199.143	5.56	10.8225	1.6344e-11	872.271	5.71484	678.684	0	375.799	7.50846	866.556	152.632	2.18365
550.3/14.0 (54379)	550.329	13.98	3.49473	0.0016	14.6551	0.0972239	5.99625	0	19.5482	0.445536	14.5578	150.735	2.17821
200.1/4.9 (11183)	200.09	4.95	8.35468	4.3402e-09	812.038	5.44317	841.167	0	453.148	8.46393	806.594	149.185	2.17372
473.2/5.7 (44132)	473.245	5.73	5.05718	2.3719e-05	812.826	5.47171	838.858	0	749.42	11.7876	807.354	148.551	2.17187
337.2/15.3 (24384)	337.213	15.27	4.32432	0.00018	21.9049	0.148391	11.7326	0	23.6008	0.680012	21.7565	147.617	2.16914
506.2/3.9 (48597)	506.182	3.9	3.5806	0.00128	72.5069	0.499491	16.2678	0	94.3988	1.61481	72.0074	145.161	2.16185
552.3/14.3 (54646)	552.341	14.29	9.11603	7.1268e-10	120.375	0.833632	104.211	0	61.2796	3.82018	119.541	144.398	2.15956
299.3/15.3 (19418)	299.257	15.27	4.18714	0.00025	28.7547	0.20043	14.6375	0	32.007	0.633029	28.5543	143.465	2.15675
348.1/4.0 (26247)	348.149	4.04	4.48693	0.00011	90.2378	0.630005	50.3192	0	93.7243	2.00669	89.6078	143.233	2.15604
349.1/3.7 (26426)	349.125	3.68	3.64663	0.00107	194.409	1.37381	0	0	248.527	2.90368	193.035	141.511	2.15079
571.3/5.8 (56866)	571.344	5.78	12.3711	7.2376e-13	862.939	6.2109	804.3	0	324.668	11.6702	856.728	138.939	2.14283
489.3/7.9 (46418)	489.306	7.91	6.53315	4.4141e-07	276.711	2.01934	274.95	0	197.277	5.027	274.692	137.03	2.13682
229.2/5.7 (13259)	229.153	5.69	22.116	2.8557e-19	124.553	0.919961	114.256	0	26.0913	1.82443	123.633	135.39	2.13159
521.3/3.7 (50732)	521.281	3.68	4.22183	0.00023	1230.93	9.09482	1017.22	0	1358.76	15.9648	1221.84	135.344	2.13144
365.2/4.6 (28981)	365.211	4.64	10.3176	4.8045e-11	124.209	0.921585	104.374	0	55.8621	3.33351	123.287	134.777	2.12962
591.3/4.4 (59016)	591.287	4.36	3.33582	0.00241	154.646	1.1476	71.8107	0	215.962	4.4279	153.498	134.756	2.12955
657.4/1.1 (65317)	657.396	1.13	14.7932	9.231e-15	216.433	1.60632	205.305	0	67.8974	4.00378	214.827	134.739	2.12949
790.4/6.5 (73992)	790.395	6.51	6.28341	8.566e-07	120.049	0.902549	117.267	0	88.8168	3.99574	119.147	133.011	2.12389
354.2/2.9 (27468)	354.166	2.89	9.54574	2.6588e-10	108.361	0.818809	109.985	0	52.7849	2.22498	107.542	132.339	2.12169
274.2/4.0 (17070)	274.186	3.96	4.53723	9.8176e-05	14.7058	0.111894	12.0937	0	15.082	0.512765	14.5939	131.426	2.11868
518.3/4.4 (50369)	518.316	4.4	3.42501	0.00191	58.3389	0.449373	0	0	79.3006	2.05929	57.8895	129.823	2.11335
273.1/4.0 (16871)	273.144	4.05	4.44521	0.00013	35.1851	0.282382	18.7406	0	36.8425	0.896787	34.9027	124.601	2.09552
291.1/6.3 (18690)	291.117	6.35	18.0284	6.0554e-17	15.9364	0.128601	17.8037	0	4.06678	0.406915	15.8078	123.921	2.09315
437.1/3.5 (39014)	437.134	3.51	3.71398	0.0009	41.4714	0.338661	0	0	51.9722	1.1839	41.1327	122.457	2.08798
192.1/2.3 (10707)	192.066	2.35	4.09562	0.00033	99.4311	0.838454	22.935	0	112.971	2.47983	98.5927	118.589	2.07404
520.3/14.0 (50616)	520.315	14.01	6.33707	7.4249e-07	33.9821	0.289843	30.4515	0	24.8773	1.32823	33.6923	117.243	2.06909
597.8/4.5 (59690)	597.782	4.47	3.20191	0.00339	17.9799	0.15355	12.1688	0	26.1194	0.703652	17.8263	117.095	2.06854
518.3/4.3 (50335)	518.274	4.3	4.89877	3.6578e-05	63.4701	0.546763	46.1075	0	60.1853	2.50558	62.9233	116.083	2.06477
504.3/3.1 (48382)	504.265	3.13	6.34636	7.2437e-07	727.347	6.40715	776.24	0	531.612	27.846	720.94	113.521	2.05508
597.4/7.1 (59677)	597.395	7.12	20.3857	2.4564e-18	242.124	2.14167	233.988	0	53.6972	8.30247	239.982	113.054	2.05329
317.1/1.1 (21269)	317.134	1.1	4.00303	0.00042	27.4131	0.247275	7.98584	0	31.8164	1.13315	27.1658	110.861	2.04478
410.7/4.6 (35238)	410.712	4.64	4.72881	5.8205e-05	30.2527	0.277838	20.6575	0	29.6971	1.27321	29.9749	108.886	2.03697
342.2/5.7 (25356)	342.238	5.71	11.4578	4.3987e-12	21846.6	201.71	23026.3	0	8847.65	404.185	21644.9	108.307	2.03466
309.1/4.8 (20415)	309.144	4.82	4.91445	3.5042e-05	44.6475	0.414286	48.1854	0	42.2396	0.920718	44.2333	107.77	2.0325
270.2/4.2 (16649)	270.162	4.18	3.28159	0.00277	9.06364	0.0845842	6.95732	0	12.8414	0.269987	8.97906	107.155	2.03001
533.2/7.3 (52256)	533.22	7.33	9.41129	3.6102e-10	32.7377	0.307173	32.4021	0	16.0951	1.0541	32.4305	106.578	2.02767
258.2/3.0 (15536)	258.168	3.03	7.51174	3.5042e-08	30.8737	0.291435	28.4308	0	19.0006	1.33552	30.5822	105.937	2.02505
303.2/3.8 (19810)	303.174	3.77	8.34114	4.4851e-09	64.0563	0.605184	58.6047	0	35.645	1.46886	63.4512	105.846	2.02468
708.3/4.1 (69184)	708.287	4.11	7.92285	1.251e-08	219.289	2.08368	183.795	0	128.442	5.48405	217.205	105.241	2.02219
426.2/7.6 (37483)	426.238	7.6	5.67804	4.3673e-06	27.9181	0.265475	21.989	0	22.8303	0.838809	27.6527	105.163	2.02186
464.3/3.0 (42881)	464.259	2.99	3.12915	0.00407	11.4727	0.109404	5.58781	0	17.0338	0.501352	11.3633	104.865	2.02063
608.3/4.0 (60797)	608.268	3.99	3.00385	0.00556	190.896	1.82714	0	0	295.264	8.37302	189.069	104.478	2.01902
610.3/3.9 (61069)	610.341	3.93	5.00252	2.7543e-05	48.2456	0.467117	48.1634	0	44.7913	1.4317	47.7785	103.284	2.01403
434.9/4.7 (38694)	434.898	4.69	3.9384	0.0005	58.3759	0.565621	32.5152	0	68.8882	1.4627	57.8103	103.207	2.01371
694.4/7.7 (68194)	694.449	7.67	6.29116	8.3908e-07	308.631	3.04885	223.435	0	227.838	6.74975	305.582	101.229	2.0053
439.3/6.3 (39379)	439.295	6.34	8.30781	4.863e-09	331.661	3.34162	300.25	0	184.391	13.2203	328.319	99.2513	1.99674
200.1/2.9 (11184)	200.09	2.87	9.96041	1.0505e-10	28.2586	0.29047	30.7416	0	13.1379	0.706558	27.9682	97.2859	1.98805
412.2/2.7 (35450)	412.17	2.73	6.23393	9.775e-07	209.095	2.15738	214.307	0	155.433	7.43142	206.938	96.921	1.98642
514.3/3.8 (49794)	514.305	3.8	13.5933	7.4513e-14	124.937	1.29521	107.974	0	42.2184	4.09332	123.642	96.4607	1.98435
274.2/3.5 (17063)	274.178	3.54	7.21831	7.4038e-08	101.413	1.06129	98.2939	0	65.1274	2.83894	100.352	95.5561	1.98026
475.2/6.1 (44363)	475.219	6.08	10.3112	4.8724e-11	62.6741	0.655897	59.1391	0	27.9791	2.43768	62.0182	95.5548	1.98025
368.2/5.3 (29382)	368.192	5.33	5.48718	7.3356e-06	93.044	0.981114	69.2849	0	78.4629	4.49603	92.0629	94.8351	1.97697
164.1/6.4 (9119)	164.07	6.4	23.7914	4.0844e-20	52.5817	0.560118	48.6049	0	9.43143	2.56678	52.0216	93.876	1.97255
672.3/6.6 (66522)	672.265	6.55	4.67485	6.7447e-05	19.4761	0.207532	15.874	0	19.2961	0.951033	19.2685	93.8458	1.97242
380.2/5.1 (31056)	380.217	5.07	11.7743	2.3283e-12	235.883	2.51755	226.212	0	92.2921	7.58844	233.365	93.6953	1.97172
334.7/4.4 (23832)	334.681	4.4	3.65401	0.00105	8.39466	0.0902386	5.3252	0	10.6519	0.413525	8.30442	93.0274	1.96861
653.2/4.5 (64890)	653.219	4.5	4.94774	3.1994e-05	25.1216	0.270919	25.0018	0	23.5032	1.24151	24.8507	92.7276	1.96721
244.2/3.0 (14377)	244.165	3.04	3.24064	0.00307	113.185	1.23169	79.9578	0	162.165	2.7129	111.953	91.8938	1.96329
618.2/6.0 (61863)	618.241	6.05	4.16901	0.00027	15.3946	0.168656	13.8574	0	17.1061	0.77288	15.226	91.2783	1.96037
661.4/4.6 (65730)	661.377	4.63	8.44477	3.4909e-09	68.0088	0.746563	50.9697	0	37.2364	2.2197	67.2623	91.0959	1.9595
521.3/3.5 (50731)	521.28	3.54	3.08945	0.0045	566.634	6.26835	0	0	851.548	10.6182	560.365	90.396	1.95615
648.3/3.8 (64514)	648.319	3.84	5.92863	2.2178e-06	503.299	5.63119	498.2	0	393.857	10.0021	497.667	89.377	1.95123
557.3/4.2 (55285)	557.328	4.18	4.53195	9.9599e-05	1865.79	21.0317	1684.4	0	1908.71	64.5493	1844.76	88.7132	1.94799
439.2/1.0 (39323)	439.228	1.05	9.37424	3.9294e-10	122.806	1.39137	121.4	0	59.9776	6.37604	121.415	88.2629	1.94578
434.2/1.1 (38596)	434.171	1.07	14.3648	1.9159e-14	244.334	2.79995	218.993	0	77.7303	8.76393	241.534	87.2636	1.94083
336.2/3.7 (24132)	336.194	3.73	2.9945	0.00569	77.5124	0.893303	0	0	120.098	2.19631	76.6191	86.7705	1.93837
307.1/8.0 (20172)	307.11	8.01	7.1706	8.3695e-08	39.6407	0.458009	48.6932	0	25.5849	1.23372	39.1827	86.5501	1.93727
564.3/6.3 (56063)	564.302	6.29	10.2988	5.0047e-11	74.3151	0.868112	67.84	0	33.3628	1.83102	73.447	85.6054	1.9325
348.1/2.9 (26239)	348.123	2.89	4.90129	3.6327e-05	34.5679	0.404207	28.923	0	32.6799	1.15635	34.1637	85.5204	1.93207
530.3/4.2 (51920)	530.271	4.18	7.23942	7.0134e-08	128.699	1.50726	105.967	0	82.0063	5.70704	127.192	85.386	1.93139
348.2/6.1 (26298)	348.195	6.08	8.10467	7.9871e-09	30.7433	0.366904	26.7572	0	17.5283	1.00181	30.3764	83.791	1.9232
481.2/3.5 (45127)	481.156	3.54	5.55584	6.086e-06	70.4548	0.84421	88.0303	0	58.7569	1.90754	69.6106	83.4565	1.92146
525.3/3.9 (51229)	525.253	3.95	6.68797	2.9356e-07	95.1493	1.15004	110.068	0	65.8192	3.07531	93.9993	82.7356	1.91769
417.2/6.5 (36283)	417.25	6.51	9.92686	1.1315e-10	100.658	1.22159	91.2152	0	46.6148	3.97562	99.4362	82.399	1.91592
370.1/3.8 (29624)	370.105	3.8	2.77285	0.00977	4.01319	0.0487439	0	0	6.70912	0.1563	3.96444	82.3322	1.91557
323.3/14.9 (22084)	323.258	14.91	4.1645	0.00027	22.2683	0.271221	22.5489	0	24.7765	0.726281	21.997	82.1037	1.91436
273.1/3.4 (16876)	273.146	3.44	3.5113	0.00153	34.2392	0.422509	2.48529	0	45.1599	1.5207	33.8167	81.0379	1.90869
532.2/3.5 (52122)	532.153	3.52	6.03264	1.6763e-06	14.2099	0.176788	17.6158	0	10.8872	0.560916	14.0331	80.3781	1.90514
402.9/1.6 (34198)	402.935	1.61	3.22512	0.0032	11.4024	0.143265	0	0	16.373	0.514521	11.2591	79.5897	1.90086
281.2/15.3 (17744)	281.247	15.27	5.70257	4.0864e-06	101.434	1.28816	67.7017	0	82.3507	2.738	100.146	78.7434	1.89621
629.3/5.9 (62917)	629.254	5.89	4.90257	3.6199e-05	34.4734	0.445501	36.5612	0	32.4321	2.04154	34.0279	77.3813	1.88864
774.5/6.0 (73169)	774.463	5.96	3.05603	0.00489	8.75938	0.114774	0	0	13.2568	0.525963	8.64461	76.3182	1.88263
382.2/1.0 (31293)	382.175	1.02	4.30518	0.00018	75.1786	0.99579	33.6145	0	80.7581	3.16143	74.1828	75.4964	1.87793
274.2/1.1 (17065)	274.182	1.11	4.3844	0.00015	29.1642	0.38821	35.577	0	30.6908	1.779	28.776	75.1249	1.87578
725.3/5.3 (70294)	725.298	5.33	3.72768	0.00087	16.815	0.225594	0	0	20.8336	1.0338	16.5894	74.5367	1.87237
503.3/4.0 (48268)	503.271	3.98	6.43258	5.7607e-07	1708.05	22.9725	1963.14	0	1229.11	31.1359	1685.08	74.3522	1.87129
590.3/4.7 (58920)	590.305	4.66	5.32844	1.1306e-05	35.7253	0.481415	41.9918	0	30.8625	2.20612	35.2439	74.209	1.87046
713.3/6.4 (69491)	713.291	6.42	4.71	6.1275e-05	29.8697	0.403163	41.2426	0	29.2317	1.84752	29.4665	74.0884	1.86975
479.2/3.5 (44874)	479.202	3.51	7.50653	3.5507e-08	33.6349	0.456369	37.2403	0	20.6004	1.59901	33.1785	73.7011	1.86747
506.3/2.5 (48662)	506.296	2.48	3.85988	0.00061	29.8179	0.406603	15.9312	0	35.6589	1.86329	29.4113	73.3343	1.86531
260.2/5.1 (15739)	260.197	5.06	5.62056	5.1046e-06	96.5578	1.31921	90.0595	0	79.3725	3.52404	95.2386	73.1938	1.86447
651.3/5.6 (64771)	651.332	5.62	3.54139	0.00142	10.2793	0.141481	8.56612	0	13.4032	0.648349	10.1378	72.6547	1.86126
401.1/1.1 (33903)	401.081	1.06	2.97216	0.00602	11.2557	0.155028	0	0	17.502	0.71043	11.1007	72.6041	1.86096
253.0/1.4 (15104)	253.04	1.38	6.79831	2.1984e-07	19.562	0.271389	20.8907	0	13.2442	0.923595	19.2907	72.0811	1.85782
237.1/2.4 (13849)	237.086	2.44	5.58308	5.6515e-06	85.8067	1.19091	110.024	0	71.0042	3.04729	84.6158	72.0516	1.85764
514.3/13.7 (49800)	514.328	13.71	5.70679	4.0398e-06	9.43727	0.131237	7.05639	0	7.59805	0.601404	9.30603	71.9101	1.85679
661.3/4.1 (65706)	661.326	4.07	6.44994	5.5016e-07	41.0064	0.571215	48.2277	0	29.1456	2.61763	40.4352	71.7881	1.85605
483.3/4.4 (45520)	483.256	4.4	3.83756	0.00065	128.021	1.79748	95.0806	0	154.26	4.85007	126.223	71.2222	1.85262
478.8/4.2 (44819)	478.774	4.2	6.14761	1.2314e-06	281.28	3.96186	290.477	0	211.127	10.8619	277.319	70.9971	1.85124
312.2/3.9 (20721)	312.166	3.92	3.17207	0.00365	22.5784	0.31854	18.1811	0	32.9025	1.14309	22.2599	70.8809	1.85053
316.2/3.8 (21171)	316.189	3.82	4.23693	0.00022	120.193	1.70102	94.8889	0	130.744	7.79504	118.492	70.6596	1.84917
367.7/5.5 (29310)	367.734	5.5	3.33668	0.0024	71.6979	1.02567	25.3268	0	99.2479	4.08421	70.6723	69.9038	1.8445
124.0/1.1 (6767)	124.039	1.1	4.66269	6.9724e-05	11.9741	0.171961	15.7361	0	11.8204	0.788023	11.8022	69.633	1.84282
334.1/5.1 (23709)	334.073	5.1	10.4343	3.7344e-11	424.914	6.10588	386.973	0	187.796	10.1156	418.808	69.5909	1.84255
292.1/2.9 (18838)	292.139	2.92	5.36573	1.0213e-05	28.6074	0.411346	30.882	0	24.5623	1.49221	28.196	69.5457	1.84227
349.1/3.4 (26424)	349.122	3.42	3.30171	0.00263	13.0161	0.189193	0	0	18.191	0.866992	12.8269	68.7979	1.83757
344.3/6.1 (25697)	344.255	6.08	9.11712	7.1086e-10	221.31	3.26274	226.03	0	111.286	9.54189	218.047	67.8294	1.83142
515.3/3.0 (49942)	515.329	3.03	7.437	4.2355e-08	67.8319	1.01124	64.8665	0	41.7128	4.00517	66.8207	67.0777	1.82658
281.1/1.1 (17652)	281.073	1.09	16.0022	1.2814e-15	55.841	0.838589	51.8106	0	15.5873	2.64856	55.0024	66.5892	1.8234
157.1/1.9 (8618)	157.096	1.94	7.01913	1.2374e-07	10.245	0.154804	12.9587	0	6.72948	0.334796	10.0902	66.1804	1.82073
641.3/3.9 (63892)	641.255	3.95	4.77275	5.1621e-05	24.4723	0.376841	24.104	0	23.5489	1.7269	24.0954	64.9405	1.81252
345.2/3.0 (25782)	345.167	2.96	4.86045	4.0618e-05	77.2867	1.20516	55.6146	0	73.2556	3.81334	76.0815	64.1296	1.80706
343.2/4.1 (25492)	343.198	4.1	7.38113	4.8823e-08	54.0764	0.844474	39.3709	0	33.6756	2.26333	53.2319	64.0356	1.80642
400.0/1.4 (33731)	399.998	1.37	4.15196	0.00028	19.918	0.315934	21.8913	0	22.0509	1.44779	19.6021	63.0449	1.79965
561.7/4.6 (55792)	561.72	4.65	3.12936	0.00407	7.20865	0.115624	0	0	10.6104	0.529858	7.09303	62.3454	1.7948
341.0/2.5 (24938)	341.011	2.51	4.11211	0.00031	22.7526	0.365001	15.3911	0	25.4625	1.44672	22.3876	62.3358	1.79474
682.3/4.3 (67264)	682.257	4.28	4.00069	0.00042	11.5686	0.186214	9.22494	0	13.2916	0.853341	11.3824	62.1252	1.79327
291.1/7.8 (18703)	291.134	7.8	17.9309	6.9667e-17	150.229	2.42151	145.235	0	36.3792	8.363	147.808	62.0394	1.79267
401.1/3.2 (33915)	401.15	3.19	3.02054	0.00534	2.31722	0.0376997	0	0	3.5332	0.172762	2.27952	61.4651	1.78863
553.0/1.2 (54701)	553.041	1.17	3.62509	0.00114	16.3562	0.267175	0	0	20.7508	1.22435	16.0891	61.2192	1.78689
359.2/3.7 (28194)	359.228	3.7	4.21378	0.00024	43.2377	0.706466	25.2163	0	47.1187	3.23743	42.5313	61.2028	1.78677
357.3/1.1 (27923)	357.252	1.12	11.2846	6.2612e-12	1401.63	22.9522	1327.65	0	570.24	39.7451	1378.67	61.0671	1.78581
538.3/3.8 (52832)	538.251	3.76	9.46885	3.1662e-10	268.86	4.44054	230.963	0	129.558	12.8015	264.42	60.5467	1.78209
463.3/6.3 (42763)	463.257	6.35	6.79459	2.2199e-07	13.791	0.228034	12.2327	0	9.22659	1.04499	13.563	60.4777	1.78159
364.2/5.7 (28859)	364.22	5.69	43.8407	2.383e-27	213.033	3.55035	209.721	0	19.6902	6.80415	209.483	60.0034	1.77818
432.2/2.8 (38341)	432.188	2.77	3.51171	0.00153	23.567	0.392784	12.9101	0	30.8623	1.76153	23.1742	59.9998	1.77815
335.1/4.7 (23880)	335.104	4.69	3.81107	0.0007	16167.8	269.655	0	0	19534.3	921.842	15898.1	59.9573	1.77784
326.2/5.6 (22414)	326.171	5.6	4.37653	0.00015	12.1632	0.20404	6.04207	0	12.7908	0.645592	11.9592	59.6118	1.77533
529.3/5.8 (51806)	529.294	5.84	4.19562	0.00025	10.1745	0.171612	8.12812	0	11.126	0.786425	10.0029	59.288	1.77297
666.3/3.6 (66092)	666.344	3.56	4.68019	6.647e-05	19.4454	0.328575	18.0347	0	19.032	1.50572	19.1168	59.1808	1.77218
164.1/6.9 (9126)	164.106	6.91	24.1331	2.7895e-20	540.877	9.17278	499.871	0	95.6789	24.8917	531.705	58.9655	1.7706
337.7/5.0 (24434)	337.699	5	3.10997	0.00427	26.3847	0.447821	0	0	39.0275	2.05218	25.9369	58.9179	1.77025
665.3/5.2 (66009)	665.298	5.16	2.79658	0.00923	82.2783	1.40489	49.9871	0	135.66	3.81933	80.8734	58.5655	1.76764
347.2/3.4 (26138)	347.194	3.35	3.65232	0.00106	11.5131	0.197288	0.681296	0	14.4782	0.904085	11.3158	58.3568	1.76609
160.0/6.1 (8806)	160.043	6.12	6.4194	5.9658e-07	33.9971	0.588264	29.0477	0	24.0637	2.69576	33.4089	57.7923	1.76187
736.4/3.5 (71003)	736.384	3.52	4.57091	8.9565e-05	23.7001	0.420868	11.9639	0	23.7198	1.92866	23.2792	56.3123	1.7506
765.8/7.5 (72692)	765.752	7.49	12.9024	2.6428e-13	87.988	1.56385	79.045	0	29.3416	7.16646	86.4242	56.2637	1.75023
350.1/3.4 (26574)	350.119	3.42	4.97075	3.0043e-05	32.2194	0.574349	36.9444	0	29.7963	1.52995	31.6451	56.0973	1.74894
335.1/2.8 (23881)	335.104	2.85	4.7023	6.2576e-05	2801.88	50.1502	3500.59	0	2734.54	171.07	2751.73	55.8697	1.74718
484.2/9.4 (45612)	484.158	9.4	5.9284	2.2192e-06	125.97	2.28544	140.907	0	97.4165	6.56398	123.685	55.1187	1.7413
425.2/1.1 (37290)	425.167	1.11	3.77302	0.00077	160.577	2.91441	0	0	195.081	13.3555	157.663	55.0978	1.74113
337.2/4.5 (24360)	337.193	4.49	2.97021	0.00605	17.8452	0.324639	1.51987	0	27.6314	1.22411	17.5206	54.9694	1.74012
482.2/5.9 (45269)	482.16	5.86	13.0855	1.8804e-13	414.198	7.75804	436.125	0	143.451	16.664	406.44	53.3895	1.72746
440.3/3.7 (39515)	440.254	3.74	3.70218	0.00093	25.589	0.480599	20.686	0	31.6559	2.20238	25.1084	53.2439	1.72627
339.2/12.7 (24750)	339.212	12.7	3.97701	0.00045	4.15473	0.0790446	2.82758	0	4.77805	0.362228	4.07569	52.5619	1.72067
553.3/4.8 (54768)	553.334	4.81	5.32226	1.1498e-05	322.156	6.13029	266.392	0	278.07	12.9593	316.025	52.5514	1.72058
414.7/4.5 (35839)	414.727	4.5	7.40089	4.6428e-08	35.3996	0.676088	26.8426	0	21.7718	2.13313	34.7235	52.3594	1.71899
596.3/4.6 (59552)	596.339	4.64	4.28312	0.0002	26.7188	0.52457	21.7162	0	28.4651	2.40388	26.1943	50.9347	1.70701
225.1/3.8 (12809)	225.088	3.82	3.03496	0.00515	32.047	0.642173	3.10553	0	48.5341	1.47582	31.4048	49.904	1.69814
385.2/6.3 (31685)	385.201	6.27	2.83513	0.00841	4.13252	0.0837879	0	0	6.67825	0.383964	4.04873	49.3212	1.69303
690.3/1.1 (67884)	690.303	1.11	3.14912	0.00387	29.1852	0.598757	0	0	42.4047	2.74385	28.5864	48.7429	1.68791
231.1/4.7 (13441)	231.112	4.68	5.01802	2.64e-05	30.2118	0.620922	24.5405	0	27.5058	2.0192	29.5909	48.6563	1.68714
227.1/3.6 (13010)	227.138	3.63	3.34254	0.00237	25.9854	0.534356	10.0994	0	35.6991	1.26022	25.451	48.6294	1.6869
474.9/1.4 (44325)	474.896	1.37	3.6597	0.00104	10.1834	0.211029	4.31163	0	12.7038	0.967057	9.97235	48.2558	1.68355
200.1/4.6 (11191)	200.093	4.58	7.68307	2.2753e-08	454.25	9.42798	529.202	0	270.915	14.3728	444.822	48.181	1.68288
378.2/4.1 (30786)	378.22	4.14	3.86826	0.0006	56.1096	1.16618	27.9669	0	66.4245	3.80672	54.9434	48.1141	1.68227
634.3/3.4 (63362)	634.347	3.37	6.84028	1.9701e-07	103.773	2.22319	114.3	0	69.2947	4.81821	101.55	46.6773	1.66911
307.1/8.7 (20170)	307.11	8.73	5.02596	2.5833e-05	23.5015	0.504237	22.3564	0	21.4287	0.994482	22.9973	46.6081	1.66846
703.3/1.1 (68817)	703.331	1.11	2.86444	0.00783	30.3255	0.65867	0	0	48.3989	3.01841	29.6669	46.0406	1.66314
657.2/8.1 (65249)	657.235	8.12	5.31275	1.1801e-05	29.3985	0.652117	27.5942	0	25.1927	2.08678	28.7464	45.0817	1.654
239.0/1.3 (13962)	238.97	1.31	3.12887	0.00407	3.17541	0.0704939	1.10274	0	4.63171	0.323044	3.10491	45.0451	1.65365
490.3/4.5 (46533)	490.285	4.51	3.16179	0.00375	48.1527	1.07111	32.8283	0	69.4913	4.90844	47.0815	44.9559	1.65279
626.4/6.3 (62685)	626.351	6.27	6.91451	1.6236e-07	22.3519	0.501057	25.6127	0	14.3883	2.29613	21.8508	44.6095	1.64943
182.1/6.4 (10134)	182.081	6.39	24.901	1.2051e-20	100.112	2.24782	96.4654	0	16.7529	4.89586	97.8644	44.5374	1.64872
304.2/3.6 (19925)	304.188	3.59	7.53568	3.2982e-08	540.445	12.2752	536.306	8.33278	328.007	17.1104	528.17	44.0274	1.64372
522.3/14.0 (50854)	522.298	14.01	2.88949	0.00737	4.60217	0.105163	0	0	7.26831	0.481917	4.49701	43.7623	1.6411
282.1/2.1 (17791)	282.12	2.11	3.29539	0.00267	11.2929	0.260706	1.90037	0	15.6063	1.19471	11.0321	43.3164	1.63665
410.2/1.0 (35198)	410.239	1.04	3.5574	0.00136	39.2494	0.918205	24.0186	0	50.2107	3.94618	38.3312	42.7458	1.63089
176.1/3.1 (9806)	176.073	3.13	11.1921	7.5716e-12	129.67	3.04632	123.746	0	50.008	11.3418	126.624	42.5663	1.62907
680.2/7.7 (67117)	680.213	7.73	3.19722	0.00343	25.3307	0.599011	10.6777	0	36.2675	1.27295	24.7317	42.2876	1.62621
488.1/7.7 (46189)	488.124	7.73	8.63431	2.2155e-09	34.1579	0.809842	39.806	0	17.6732	2.57535	33.3481	42.1785	1.62509
498.3/6.5 (47636)	498.332	6.46	9.91507	1.1615e-10	226.971	5.43481	212.834	0	104.065	8.44907	221.536	41.7624	1.62079
343.2/1.1 (25534)	343.234	1.11	22.8012	1.2693e-19	1327.45	31.7947	1329.04	24.7092	262.849	29.0505	1295.66	41.7508	1.62066
279.1/2.4 (17425)	279.1	2.44	4.52986	0.0001	108.223	2.59916	138.684	0	108.782	7.87172	105.624	41.6375	1.61948
485.3/3.8 (45817)	485.261	3.81	3.38821	0.00211	367.604	8.84603	0	0	494.796	30.9115	358.758	41.5558	1.61863
413.3/5.7 (35662)	413.278	5.73	4.87818	3.8696e-05	59.7277	1.43794	41.0888	0	55.7141	4.20692	58.2898	41.5369	1.61843
317.2/3.3 (21287)	317.179	3.29	4.60536	8.1532e-05	70.7915	1.70739	62.4527	0	69.345	7.82425	69.0841	41.4618	1.61765
274.1/2.9 (17048)	274.129	2.92	7.37019	5.0203e-08	50.5872	1.22964	50.881	0	31.1299	2.81738	49.3575	41.1399	1.61426
475.9/1.3 (44453)	475.915	1.32	2.85675	0.00798	7.38348	0.179779	0	0	11.7691	0.823853	7.2037	41.0697	1.61352
424.2/5.1 (37145)	424.156	5.15	3.02435	0.00529	137.352	3.37721	0	0	206.718	14.6706	133.975	40.6703	1.60928
703.4/4.4 (68835)	703.362	4.36	4.26203	0.00021	128.947	3.17993	106.787	0	137.783	9.30243	125.767	40.5504	1.60799
234.1/3.9 (13658)	234.133	3.95	5.63109	4.9606e-06	34.6495	0.854503	33.9301	0	28.0223	1.89169	33.795	40.5493	1.60798
690.3/4.4 (67896)	690.329	4.36	4.7806	5.0526e-05	22.9527	0.573464	24.7565	0	21.5858	2.62794	22.3793	40.0247	1.60233
683.9/8.9 (67413)	683.872	8.87	5.42113	8.7813e-06	22.5533	0.569377	18.1728	0	18.872	1.60698	21.9839	39.6104	1.59781
410.3/1.0 (35201)	410.253	1	3.00944	0.00549	28.8311	0.727988	0	0	43.5791	3.07987	28.1031	39.6038	1.59774
343.2/1.1 (25499)	343.2	1.11	9.72646	1.769e-10	537.978	13.6178	506.291	0	248.585	30.2718	524.36	39.5055	1.59666
483.2/4.7 (45510)	483.245	4.69	2.84625	0.00819	16.1369	0.413302	0	0	25.7675	1.89399	15.7236	39.044	1.59155
706.4/5.9 (69056)	706.351	5.89	5.41935	8.8239e-06	117.178	3.01983	81.2909	0	98.3349	6.76602	114.158	38.8027	1.58886
493.0/9.6 (46874)	493.014	9.6	3.32297	0.00249	23.8614	0.622143	11.4133	0	32.6801	2.04551	23.2392	38.3535	1.58381
436.2/8.3 (38876)	436.191	8.32	4.1008	0.00032	27.4835	0.717649	30.1734	0	30.2048	3.28868	26.7659	38.2966	1.58316
332.1/2.9 (23428)	332.13	2.93	6.12119	1.3217e-06	76.3742	2.02923	87.1406	0	56.1422	6.34743	74.345	37.637	1.57562
652.7/7.1 (64855)	652.683	7.09	6.45547	5.4216e-07	183.78	4.96343	157.874	0	128.243	13.7482	178.816	37.0268	1.56852
407.3/5.1 (34777)	407.266	5.06	4.44073	0.00013	634.456	17.4762	469.752	0	648.571	44.6991	616.98	36.304	1.55995
769.4/4.7 (72882)	769.404	4.65	5.81778	2.9915e-06	44.2764	1.23184	44.7659	0	34.5389	2.37706	43.0446	35.9432	1.55562
463.3/4.6 (42759)	463.255	4.58	3.33721	0.0024	25.2706	0.710338	21.4277	0	34.173	3.25518	24.5603	35.5755	1.55115
366.2/5.8 (29122)	366.202	5.78	10.0502	8.6162e-11	113.333	3.19859	118.68	0	50.8	5.18738	110.134	35.4323	1.5494
171.1/3.1 (9519)	171.112	3.13	3.50995	0.00154	56.8821	1.61356	0	0	73.0101	7.39428	55.2685	35.2525	1.54719
718.3/3.6 (69824)	718.335	3.6	7.31822	5.7323e-08	98.5875	2.80912	97.2812	0	59.8316	8.87817	95.7784	35.0956	1.54525
351.1/4.0 (26797)	351.1	4.01	5.61105	5.2381e-06	42.8628	1.22437	49.2074	0	34.463	3.25924	41.6385	35.008	1.54417
302.1/3.6 (19676)	302.105	3.57	4.51695	0.0001	48.484	1.40557	21.9953	0	48.7121	2.99668	47.0784	34.4942	1.53775
129.1/3.1 (6964)	129.101	3.13	5.75446	3.5505e-06	58.1257	1.68733	74.8299	0	45.2062	5.56549	56.4384	34.4483	1.53717
410.2/5.0 (35172)	410.192	4.98	8.28771	5.1065e-09	378.881	11.0169	343.225	0	201.182	34.4575	367.864	34.3909	1.53644
494.2/4.0 (47035)	494.18	4.03	3.52153	0.00149	10.6338	0.309226	4.8079	0	13.6788	0.984671	10.3245	34.3883	1.53641
720.4/5.7 (69986)	720.35	5.73	3.79823	0.00072	23.5885	0.690106	12.9185	0	27.8641	3.16246	22.8984	34.181	1.53378
569.3/6.3 (56626)	569.313	6.35	9.67028	2.007e-10	20.0451	0.587589	18.7699	0	8.43466	2.69267	19.4575	34.1141	1.53293
628.4/4.3 (62877)	628.369	4.32	4.89164	3.7298e-05	16.8182	0.498433	15.8652	0	15.2443	2.2841	16.3198	33.7422	1.52817
386.2/4.9 (31870)	386.213	4.89	2.81472	0.00884	41.1229	1.22194	0	0	66.1489	4.70655	39.901	33.6539	1.52704
180.1/1.1 (10038)	180.087	1.14	15.1391	5.1806e-15	39.4126	1.18161	39.7059	0	10.0506	3.98014	38.231	33.355	1.52316
732.9/6.5 (70791)	732.861	6.52	3.39427	0.00207	7.36291	0.221062	5.41851	0	9.74956	1.01303	7.14185	33.307	1.52254
679.3/6.3 (67066)	679.303	6.33	4.32151	0.00018	20.185	0.623095	15.2775	0	21.0251	1.9757	19.5619	32.3946	1.51047
158.1/4.4 (8681)	158.096	4.37	7.92361	1.2486e-08	56.5691	1.75615	52.5693	0	31.8813	3.93791	54.813	32.212	1.50802
654.0/1.6 (64956)	653.969	1.57	3.3946	0.00207	8.09936	0.253177	0	0	10.6975	1.1602	7.84618	31.9908	1.50503
375.1/4.9 (30339)	375.13	4.92	12.1011	1.222e-12	910.065	28.4664	936.52	0	335.567	42.0784	881.599	31.9698	1.50474
424.2/5.5 (37140)	424.154	5.52	11.0711	9.7241e-12	1014.08	32.0053	946.898	0	402.381	68.1063	982.071	31.6847	1.50085
424.2/3.5 (37186)	424.212	3.46	7.28213	6.2864e-08	33.624	1.06177	36.2355	0	19.537	4.86565	32.5622	31.6678	1.50062
612.4/4.2 (61259)	612.408	4.24	3.43577	0.00186	5.86352	0.186606	5.01644	0	7.64003	0.855138	5.67691	31.4219	1.49723
344.3/6.3 (25696)	344.255	6.33	4.95264	3.1568e-05	46.8801	1.49514	40.4001	0	42.3559	4.80106	45.3849	31.355	1.49631
353.2/3.1 (27259)	353.155	3.15	5.90221	2.3816e-06	33.0194	1.05621	35.2186	0	24.738	3.72537	31.9632	31.2621	1.49502
485.3/4.3 (45821)	485.263	4.25	8.58336	2.5024e-09	1027.09	33.0311	1098.9	20.8133	540.702	36.8025	994.057	31.0946	1.49268
401.2/5.7 (33960)	401.218	5.67	4.33668	0.00017	323.926	10.429	420.796	0	338.141	18.8664	313.497	31.0602	1.4922
305.1/6.5 (19971)	305.118	6.46	3.32178	0.0025	1.98791	0.0644086	0	0	2.67876	0.295157	1.9235	30.864	1.48945
450.2/7.8 (40867)	450.17	7.8	14.8105	8.9655e-15	999.674	32.7604	970.578	0	243.48	117.813	966.914	30.5147	1.48451
327.1/1.0 (22541)	327.076	1	3.10336	0.00434	4.32517	0.141823	0	0	6.24592	0.649915	4.18334	30.4969	1.48426
358.3/6.8 (28061)	358.269	6.83	10.6034	2.5998e-11	458.149	15.0407	433.242	0	191.929	25.8482	443.108	30.4605	1.48374
536.3/13.7 (52618)	536.309	13.72	3.06896	0.00473	4.02194	0.132398	0	0	5.91172	0.433285	3.88954	30.3777	1.48256
647.3/4.2 (64422)	647.277	4.2	3.34929	0.00233	10.6331	0.350952	0	0	14.1896	1.60826	10.2821	30.2978	1.48141
333.2/2.0 (23619)	333.177	1.95	2.93057	0.00667	6.05514	0.200435	0	0	9.2681	0.918509	5.85471	30.21	1.48015
404.2/2.7 (34376)	404.192	2.74	8.07729	8.5432e-09	432.349	14.3872	381.808	0	238.595	29.0703	417.961	30.051	1.47786
350.2/5.9 (26676)	350.207	5.88	8.86862	1.2712e-09	276.859	9.25463	293.013	0	138.818	17.9532	267.604	29.9157	1.4759
482.2/7.5 (45268)	482.16	7.45	3.82003	0.00068	15.3775	0.520191	11.1142	0	17.8701	2.38382	14.8573	29.5612	1.47072
543.3/3.7 (53442)	543.261	3.67	7.46537	3.9411e-08	139.734	4.78797	163.782	0	83.2135	10.59	134.946	29.1844	1.46515
341.1/2.5 (25087)	341.142	2.49	4.54029	9.7361e-05	34.9635	1.20197	39.6626	0	33.9384	5.19275	33.7615	29.0886	1.46372
609.3/13.7 (60936)	609.308	13.72	11.7945	2.2365e-12	197.205	6.90647	168.097	0	72.7921	13.2872	190.298	28.5537	1.45566
346.2/3.8 (25970)	346.196	3.75	3.58937	0.00125	269.585	9.46332	0	0	336.365	32.6398	260.122	28.4874	1.45465
544.3/13.4 (53611)	544.341	13.4	6.59753	3.7244e-07	46.5746	1.63971	47.8922	0	31.3947	3.85882	44.9349	28.4041	1.45338
351.2/3.4 (26845)	351.165	3.39	7.19152	7.9311e-08	70.4017	2.51476	79.2611	0	43.6912	4.73189	67.887	27.9954	1.44709
342.2/7.4 (25358)	342.239	7.44	17.3542	1.6173e-16	11.7996	0.421786	11.6495	0	2.63769	1.0041	11.3778	27.9752	1.44677
360.2/4.9 (28334)	360.214	4.95	9.03477	8.6109e-10	1276.27	45.9209	1133.33	0	632.501	59.518	1230.35	27.7928	1.44393
373.2/4.4 (30128)	373.242	4.39	2.85193	0.00807	3.0958	0.111842	0	0	4.84584	0.512526	2.98396	27.68	1.44217
353.1/5.1 (27204)	353.116	5.09	6.43191	5.771e-07	250.361	9.10753	206.987	0	174.48	15.2216	241.253	27.4894	1.43917
321.2/15.3 (21819)	321.24	15.27	5.82686	2.919e-06	130.154	4.74441	90.6006	2.01916	100.634	5.89389	125.409	27.433	1.43827
118.1/6.4 (6420)	118.067	6.38	16.7418	4.06e-16	50.3504	1.84363	49.7345	0	12.8441	2.83751	48.5068	27.3104	1.43633
281.1/4.7 (17667)	281.095	4.72	4.29474	0.00019	81.5342	3.00461	80.1963	0	85.0087	7.63672	78.5296	27.1364	1.43355
720.3/12.6 (69984)	720.347	12.65	3.3309	0.00244	5.59999	0.206499	1.15374	0	7.4548	0.946298	5.39349	27.1187	1.43327
392.1/1.0 (32665)	392.13	1	2.8615	0.00789	13.5868	0.503463	0	0	21.1577	2.30716	13.0834	26.9868	1.43115
538.3/4.2 (52836)	538.256	4.16	4.502	0.00011	24.8419	0.929143	36.2269	0	24.3222	3.49442	23.9127	26.7363	1.4271
365.1/3.5 (28931)	365.142	3.47	2.96312	0.00615	4.48548	0.168417	0	0	6.73166	0.771784	4.31706	26.6332	1.42542
348.0/1.4 (26206)	347.96	1.41	3.77913	0.00076	12.2658	0.461547	7.734	0	14.5497	1.17276	11.8043	26.5754	1.42448
265.3/15.0 (16255)	265.254	14.96	3.38551	0.00212	25.996	0.987634	0	0	34.2814	3.34494	25.0084	26.3215	1.42031
335.1/3.0 (23907)	335.108	3.03	5.19877	1.6108e-05	735.443	28.1161	868.139	0	626.411	79.4648	707.327	26.1574	1.41759
523.2/1.1 (50924)	523.174	1.12	3.75652	0.0008	23.1204	0.888549	10.2664	0	27.4308	2.81821	22.2319	26.0204	1.41531
401.2/5.6 (33962)	401.221	5.55	2.9882	0.00578	212.413	8.16884	0	0	319.196	21.2175	204.244	26.0028	1.41502
314.7/4.0 (20977)	314.687	3.99	3.68624	0.00097	9.33675	0.359705	3.85415	0	11.1345	1.64838	8.97704	25.9567	1.41425
343.2/1.8 (25486)	343.197	1.8	2.7935	0.0093	40.4335	1.56832	0	0	64.8988	4.74234	38.8652	25.7815	1.41131
579.3/3.1 (57750)	579.252	3.08	3.29864	0.00265	10.9787	0.432396	7.26544	0	14.7929	1.62028	10.5463	25.3904	1.40467
170.1/2.8 (9437)	170.06	2.76	3.53634	0.00143	72.9553	2.87622	41.1105	0	91.4624	10.8406	70.0791	25.365	1.40423
606.3/7.7 (60595)	606.276	7.68	5.42577	8.6709e-06	4.81875	0.191398	6.17695	0	3.87868	0.630508	4.62735	25.1766	1.401
394.0/1.1 (32938)	394.038	1.07	3.49221	0.00161	30.8832	1.26249	12.1762	0	39.3061	4.06841	29.6207	24.4622	1.3885
354.2/1.1 (27472)	354.167	1.1	4.78341	5.0138e-05	230.772	9.50505	158.421	0	215.481	17.3043	221.267	24.2788	1.38523
316.2/5.6 (21190)	316.223	5.58	4.07092	0.00035	53.5586	2.22443	21.4246	0	58.5943	5.40043	51.3341	24.0774	1.38161
533.3/4.0 (52292)	533.295	4.01	2.80337	0.00908	8.72037	0.364011	0	0	13.7706	1.58651	8.35636	23.9564	1.37942
490.1/2.5 (46462)	490.115	2.53	4.41106	0.00014	40.8417	1.70593	33.1024	0	41.2186	3.83218	39.1358	23.941	1.37914
681.4/5.7 (67247)	681.415	5.75	5.13686	1.9077e-05	82.8222	3.46632	118.254	0	68.472	15.1503	79.3559	23.8934	1.37828
297.1/2.9 (19227)	297.14	2.94	2.92599	0.00674	2.26509	0.0958342	0	0	3.41136	0.439168	2.16926	23.6355	1.37357
155.0/1.0 (8467)	155.046	1.02	10.833	1.5989e-11	106.684	4.51864	103.074	0.161892	43.2853	5.91834	102.165	23.6097	1.37309
363.2/1.0 (28699)	363.151	1.02	4.1896	0.00025	18.0398	0.769193	24.772	0	18.5374	3.52488	17.2706	23.4529	1.3702
347.0/2.8 (26057)	347.041	2.82	3.01837	0.00537	12.5966	0.53917	5.52649	0	18.5562	1.73592	12.0575	23.363	1.36853
193.1/3.1 (10735)	193.094	3.12	3.82544	0.00067	10.7447	0.463204	6.83111	0	12.3699	1.5832	10.2815	23.1965	1.36542
749.3/5.9 (71749)	749.342	5.87	3.37153	0.0022	19.8565	0.866083	12.6967	0	26.2563	2.01651	18.9904	22.9268	1.36034
199.1/2.7 (11134)	199.143	2.67	2.99183	0.00573	4.88566	0.213972	3.92384	0	7.16653	0.980544	4.67169	22.8332	1.35857
257.2/2.9 (15460)	257.161	2.89	3.1824	0.00356	3.678	0.161327	0	0	5.1245	0.515711	3.51668	22.7984	1.3579
365.2/8.0 (28970)	365.192	7.98	10.178	6.511e-11	58.6402	2.58182	62.443	0	24.4224	5.38363	56.0584	22.7127	1.35627
470.1/3.7 (43679)	470.148	3.74	3.4067	0.00201	61.1177	2.69519	40.558	0	79.9955	5.85184	58.4225	22.6766	1.35558
150.1/8.0 (8285)	150.057	8	3.50904	0.00154	1.82235	0.0803888	0	0	2.25712	0.368388	1.74196	22.6692	1.35544
331.1/6.2 (23271)	331.141	6.2	4.15561	0.00028	6.81722	0.305051	8.72934	0	7.01879	1.39792	6.51216	22.3478	1.34923
408.2/5.3 (34903)	408.249	5.28	3.91929	0.00052	87.093	3.91455	65.6384	0	98.7415	8.52328	83.1784	22.2485	1.3473
268.1/1.1 (16465)	268.103	1.14	25.7279	5.0105e-21	348.075	15.6499	349.055	16.1674	55.1981	15.9293	332.425	22.2413	1.34716
231.1/4.4 (13444)	231.112	4.39	12.8417	2.9606e-13	348.139	15.8025	310.466	5.13878	116.643	21.5619	332.337	22.0306	1.34303
396.2/4.1 (33246)	396.176	4.06	5.17788	1.7054e-05	180.856	8.21946	185.743	0	155.195	13.0517	172.636	22.0034	1.34249
338.7/4.5 (24614)	338.695	4.51	2.78848	0.00941	12.1854	0.565591	0	0	19.3465	1.85505	11.6198	21.5446	1.33334
310.1/1.1 (20509)	310.131	1.14	4.38007	0.00015	178.448	8.35401	275.756	0	172.013	38.2829	170.094	21.3607	1.32962
200.0/3.4 (11172)	200.033	3.36	4.02128	0.0004	5.61042	0.263465	4.16504	0	5.94478	1.20735	5.34696	21.2948	1.32827
733.3/6.1 (70804)	733.303	6.1	3.88643	0.00057	25.9878	1.23165	19.6736	0	29.4683	3.24398	24.7562	21.1	1.32428
697.3/4.0 (68330)	697.264	3.98	4.7325	5.7622e-05	19.9487	0.946107	22.9639	0	18.2927	2.89063	19.0026	21.085	1.32397
773.4/4.4 (73100)	773.43	4.39	3.64726	0.00107	39.5481	1.87578	21.3952	0	47.7403	5.41511	37.6723	21.0835	1.32394
327.2/13.4 (22674)	327.197	13.35	3.01551	0.00541	1.53778	0.0732643	0	0	2.21789	0.335739	1.46451	20.9894	1.322
274.1/1.1 (16982)	274.091	1.12	3.99815	0.00042	27.9591	1.336	17.0802	0	29.7321	6.12234	26.6231	20.9274	1.32072
228.1/4.1 (13104)	228.133	4.11	3.25558	0.00296	5.59557	0.268374	4.15199	0	7.56477	0.851991	5.3272	20.8499	1.3191
159.1/2.7 (8755)	159.092	2.75	3.92163	0.00052	209.292	10.0976	212.857	0	230.343	39.1472	199.195	20.7268	1.31653
372.1/1.1 (29917)	372.146	1.11	4.24161	0.00022	16.8328	0.816374	19.1657	0	16.7155	3.7411	16.0165	20.619	1.31427
416.1/6.2 (36035)	416.095	6.21	5.99076	1.8761e-06	59.4978	2.88846	67.1982	0	41.3509	10.1782	56.6094	20.5985	1.31384
250.0/1.4 (14829)	249.985	1.42	3.01934	0.00535	25.032	1.21777	18.6332	0	36.772	2.794	23.8142	20.5556	1.31293
387.3/1.1 (32071)	387.274	1.12	12.6514	4.2377e-13	1230.39	60.3416	1199.28	0	391.545	118.816	1170.05	20.3905	1.30943
168.1/1.1 (9358)	168.065	1.06	4.97142	2.9987e-05	5.97592	0.293873	6.8448	0	4.92649	1.34669	5.68205	20.3351	1.30825
385.2/4.6 (31695)	385.208	4.63	7.22217	7.3307e-08	67.6895	3.4087	49.6234	0	40.4442	6.66452	64.2808	19.8579	1.29793
502.2/1.1 (48102)	502.214	1.14	3.56784	0.00132	118.243	5.95539	0	0	141.345	27.291	112.287	19.8548	1.29786
466.2/3.4 (43115)	466.188	3.36	3.12392	0.00412	3.21445	0.162564	0	0	4.43367	0.744964	3.05188	19.7734	1.29608
359.2/3.5 (28196)	359.228	3.47	6.35177	7.14e-07	717.467	36.462	587.373	0	490.934	70.5663	681.005	19.6771	1.29396
385.3/1.1 (31729)	385.253	1.11	6.6896	2.923e-07	459.02	23.3944	503.51	11.3275	301.337	32.8699	435.626	19.6209	1.29272
682.4/7.3 (67304)	682.367	7.35	3.03902	0.0051	5.60326	0.286325	0	0	8.07997	0.93982	5.31694	19.5696	1.29158
589.3/13.2 (58784)	589.272	13.22	3.14027	0.00396	5.50488	0.281973	0	0	7.53802	1.29216	5.22291	19.5227	1.29054
358.9/1.5 (28099)	358.92	1.5	4.97658	2.9568e-05	27.7285	1.42256	22.9754	0	23.8954	4.24786	26.3059	19.492	1.28986
328.3/13.4 (22849)	328.322	13.43	3.52829	0.00146	1.19694	0.0614529	0	0	1.44411	0.281613	1.13549	19.4774	1.28953
456.3/5.8 (41784)	456.281	5.78	8.5141	2.9544e-09	99.252	5.10156	82.4455	0	49.3166	10.2804	94.1504	19.4552	1.28904
282.1/10.1 (17801)	282.144	10.13	3.03437	0.00516	9.61706	0.497692	0.854858	0	13.9484	1.35668	9.11937	19.3233	1.28608
332.1/1.1 (23439)	332.147	1.12	13.1735	1.5989e-13	319.168	16.5362	299.994	0	94.5857	32.8055	302.632	19.3012	1.28558
279.2/3.6 (17489)	279.168	3.6	2.80465	0.00905	3.56506	0.186904	0	0	5.54783	0.696067	3.37815	19.0743	1.28045
360.2/3.2 (28324)	360.212	3.24	6.956	1.4576e-07	788.153	41.3801	767.284	0	487.21	81.8846	746.773	19.0467	1.27982
409.2/2.9 (35011)	409.208	2.93	4.28821	0.00019	48.308	2.56513	35.2769	0	49.0284	6.48812	45.7429	18.8326	1.27491
467.2/4.1 (43278)	467.224	4.05	4.91354	3.513e-05	60.3272	3.21267	65.8001	0	49.6867	14.2902	57.1146	18.7779	1.27365
470.3/4.7 (43748)	470.297	4.68	6.17022	1.159e-06	516.992	27.7494	372.778	0	364.276	48.7114	489.243	18.6308	1.27023
415.2/6.3 (35936)	415.21	6.25	5.54334	6.2963e-06	35.5236	1.91393	38.5743	0	27.2671	5.1801	33.6097	18.5606	1.26859
559.3/5.6 (55508)	559.308	5.64	5.91491	2.3015e-06	381.583	20.5965	312.098	0	274.857	51.3125	360.987	18.5266	1.2678
460.2/3.8 (42356)	460.244	3.79	3.17977	0.00358	27.6385	1.494	25.291	0	37.0604	6.84637	26.1445	18.4996	1.26716
340.2/1.1 (24879)	340.198	1.1	10.4414	3.6779e-11	768.857	41.7208	724.721	0	310.184	65.4898	727.136	18.4286	1.26549
659.4/8.0 (65569)	659.411	8	4.75132	5.4735e-05	33.3255	1.81379	20.1035	0	30.6241	3.58117	31.5117	18.3734	1.26419
336.2/5.1 (24124)	336.191	5.11	5.81082	3.0483e-06	117.577	6.46774	120.958	0	84.5356	19.1376	111.11	18.179	1.25957
762.4/5.8 (72508)	762.424	5.78	17.5924	1.1389e-16	277.143	15.3185	289.85	0	62.2873	20.0432	261.825	18.0921	1.25749
474.2/4.9 (44237)	474.247	4.89	3.38876	0.0021	61.3974	3.39527	12.6747	0	79.1513	8.82725	58.0022	18.0833	1.25728
402.2/3.9 (34112)	402.216	3.86	4.29809	0.00019	36.0203	1.99836	43.1289	0	36.2053	5.31991	34.022	18.0249	1.25587
504.3/5.6 (48408)	504.291	5.56	11.3994	4.9532e-12	323.542	18.0031	321.777	11.896	121.819	20.0106	305.538	17.9714	1.25458
368.3/13.2 (29414)	368.313	13.24	2.85906	0.00794	7.15813	0.400501	0	0	10.8963	1.33484	6.75763	17.873	1.2522
516.2/8.6 (50007)	516.178	8.58	8.29821	4.9777e-09	158.208	8.90197	192.9	0	82.1346	12.5255	149.306	17.7723	1.24974
236.1/1.0 (13767)	236.149	1	22.0185	3.211e-19	230.66	12.9939	243.459	0	32.4952	20.9658	217.666	17.7514	1.24923
291.1/2.1 (18671)	291.097	2.15	4.73326	5.7502e-05	5.82218	0.328756	6.49302	0	5.27423	0.868028	5.49343	17.7097	1.24821
298.1/7.1 (19313)	298.139	7.08	4.81808	4.5606e-05	2.92575	0.165872	3.54181	0	2.53396	0.570643	2.75988	17.6386	1.24646
304.1/1.1 (19857)	304.114	1.09	3.07136	0.0047	2.2092	0.126846	0.664716	0	3.04811	0.581281	2.08235	17.4164	1.24096
379.2/4.8 (30894)	379.194	4.78	2.98269	0.00586	47.9541	2.7736	7.65827	0	69.8044	8.64164	45.1805	17.2895	1.23778
248.1/5.2 (14722)	248.112	5.2	6.92786	1.5682e-07	55.5278	3.23033	61.289	0	32.2654	9.28378	52.2975	17.1895	1.23526
335.1/5.2 (23896)	335.106	5.18	7.34255	5.387e-08	47474.5	2772.56	43781.3	1147.67	28192.1	2998.47	44701.9	17.123	1.23358
240.0/1.5 (14040)	239.971	1.52	2.97379	0.00599	12.1184	0.70927	5.97963	0	17.8354	1.60698	11.4091	17.0857	1.23263
331.2/2.9 (23296)	331.167	2.87	4.61912	7.8528e-05	37.6855	2.21814	45.3035	0	32.2754	10.1648	35.4673	16.9896	1.23018
620.3/3.9 (62097)	620.305	3.91	3.17858	0.00359	19.4833	1.14754	0	0	26.351	3.96802	18.3358	16.9783	1.22989
401.2/1.1 (33957)	401.208	1.12	3.45829	0.00176	175.67	10.4124	0	0	217.401	35.1447	165.258	16.8712	1.22715
279.2/14.5 (17520)	279.233	14.5	6.95674	1.4548e-07	19.7931	1.17984	20.8766	0	12.2311	1.8165	18.6132	16.7761	1.22469
366.2/5.1 (29124)	366.202	5.06	4.35337	0.00016	133.965	8.05035	101.378	0	132.866	17.8085	125.914	16.6409	1.22118
412.1/6.6 (35431)	412.134	6.58	3.62132	0.00115	74.3979	4.47851	43.4846	0	84.6581	20.5231	69.9194	16.6122	1.22043
578.3/6.0 (57637)	578.28	6.01	5.11839	2.0065e-05	25.8343	1.56045	21.5892	0	20.4924	5.51326	24.2739	16.5557	1.21895
741.4/4.5 (71287)	741.396	4.51	3.33666	0.0024	11.8682	0.718135	0	0	14.8039	3.29091	11.1501	16.5265	1.21818
395.2/1.0 (33098)	395.172	1.04	3.55932	0.00135	298.13	18.1812	0	0	355.995	62.2022	279.949	16.3977	1.21478
780.4/5.8 (73472)	780.396	5.85	10.3803	4.1959e-11	135.841	8.28978	141.089	0	52.838	14.663	127.551	16.3865	1.21449
176.1/4.2 (9804)	176.072	4.18	3.15264	0.00384	5.05587	0.309428	0	0	6.84088	1.12825	4.74644	16.3394	1.21324
641.4/7.8 (63928)	641.386	7.77	10.4027	3.9978e-11	51.1878	3.1413	52.9819	0	20.2499	4.91191	48.0465	16.2951	1.21206
569.3/3.9 (56619)	569.292	3.91	3.12676	0.0041	39.9788	2.46882	25.4628	0	55.6045	5.70835	37.51	16.1935	1.20934
297.2/14.5 (19254)	297.242	14.5	4.14936	0.00028	16.904	1.04465	14.9744	0	17.7013	1.87451	15.8593	16.1815	1.20902
546.3/6.1 (53849)	546.297	6.05	5.34982	1.0666e-05	33.0343	2.04417	32.0091	0	22.8151	9.36756	30.9901	16.1602	1.20845
354.1/3.0 (27404)	354.081	2.95	11.9589	1.6151e-12	467.052	28.9583	467.851	0	133.735	68.4279	438.094	16.1285	1.20759
579.3/4.2 (57776)	579.31	4.17	4.15908	0.00027	47.5373	2.96967	39.3459	0	48.9563	7.35443	44.5676	16.0076	1.20433
433.2/6.2 (38499)	433.216	6.24	6.72001	2.6988e-07	85.1747	5.35557	92.5721	0	49.9579	15.6855	79.8192	15.904	1.20151
625.3/4.1 (62566)	625.278	4.1	5.46908	7.7061e-06	15.1934	0.958334	17.9548	0	11.2386	3.03823	14.2351	15.854	1.20014
336.2/5.4 (24129)	336.192	5.42	5.09707	2.1269e-05	18.8468	1.19277	23.0614	0	15.3736	3.35697	17.6541	15.8009	1.19868
691.2/6.9 (67950)	691.186	6.94	7.87397	1.4123e-08	623.4	39.505	625.161	0	284.026	127.407	583.895	15.7803	1.19811
542.3/5.8 (53341)	542.318	5.82	5.72058	3.8917e-06	100.199	6.37441	91.6426	0	74.8959	11.3501	93.8246	15.7189	1.19642
644.3/13.2 (64163)	644.323	13.17	2.78424	0.00951	7.25502	0.464142	0	0	10.9482	2.12697	6.79088	15.631	1.19399
351.7/3.9 (26955)	351.7	3.95	4.53258	9.9428e-05	11.98	0.771547	15.0519	0	10.926	2.48685	11.2085	15.5273	1.1911
350.1/3.5 (26580)	350.123	3.46	2.78634	0.00946	25.2284	1.62492	0	0	39.1686	4.38788	23.6035	15.5259	1.19106
423.7/5.9 (37097)	423.731	5.95	3.22297	0.00321	6.04403	0.395464	3.85571	0	7.9796	1.27352	5.64856	15.2834	1.18422
417.3/4.0 (36286)	417.269	3.97	3.23482	0.00312	69.4031	4.54373	2.48436	0	91.9687	12.7477	64.8593	15.2745	1.18397
252.0/2.6 (15029)	252.035	2.63	7.46331	3.9618e-08	168.886	11.1469	155.742	0	96.4637	14.7576	157.739	15.151	1.18044
425.3/1.0 (37353)	425.265	1.02	9.92404	1.1386e-10	230.013	15.2005	208.568	0	88.0755	32.0866	214.812	15.1319	1.17989
407.2/3.9 (34758)	407.232	3.93	4.25899	0.00021	62.8606	4.16074	76.2889	0	57.2691	19.0669	58.6999	15.108	1.17921
255.1/3.6 (15318)	255.142	3.57	3.28125	0.00277	2.70724	0.179217	0	0	3.47437	0.637891	2.52802	15.1059	1.17915
252.1/2.8 (15043)	252.072	2.83	3.65302	0.00106	2.74829	0.182476	3.41046	0	3.15964	0.598293	2.56582	15.0611	1.17786
357.3/2.2 (27921)	357.251	2.22	3.04371	0.00504	96.1952	6.39057	3.96686	0	133.779	22.7911	89.8046	15.0527	1.17761
663.3/1.1 (65842)	663.282	1.15	3.00705	0.00552	25.1549	1.67168	0	0	34.9101	7.10009	23.4832	15.0476	1.17747
600.3/5.0 (59960)	600.274	5.03	2.9793	0.00591	25.4903	1.69465	0	0	36.5042	5.44253	23.7956	15.0416	1.1773
479.2/2.9 (44880)	479.213	2.88	4.37563	0.00015	79.3023	5.28416	79.2746	0	76.2784	14.0174	74.0181	15.0076	1.17631
646.3/12.9 (64353)	646.301	12.93	2.9435	0.00646	14.2143	0.94842	0	0	20.594	3.08282	13.2659	14.9874	1.17573
358.2/7.4 (28002)	358.175	7.43	4.44373	0.00013	20.3376	1.36855	21.4966	0	19.3485	3.31263	18.9691	14.8607	1.17204
490.2/6.2 (46475)	490.176	6.19	12.3574	7.4311e-13	84.6248	5.7134	85.3556	0	22.5131	12.527	78.9114	14.8116	1.1706
396.1/2.6 (33222)	396.139	2.62	5.97678	1.948e-06	102.02	6.92665	128.504	0	55.3438	31.7419	95.0934	14.7286	1.16816
557.2/6.5 (55227)	557.234	6.52	4.02164	0.0004	19.9987	1.36183	26.9992	0	20.1593	5.18212	18.6369	14.6852	1.16688
330.2/2.9 (23139)	330.166	2.88	13.5411	8.1855e-14	344.524	23.5992	330.848	0	79.9359	48.9719	320.924	14.5989	1.16432
357.2/3.7 (27899)	357.215	3.66	5.03687	2.5074e-05	538.292	37.2456	471.21	19.5724	462.441	41.6784	501.047	14.4525	1.15994
436.6/4.2 (38956)	436.635	4.17	2.91942	0.00685	2.72863	0.189344	0	0	3.84701	0.867684	2.53929	14.411	1.15869
564.3/13.2 (56067)	564.308	13.24	4.30312	0.00019	21.1171	1.47047	20.1303	0	18.6043	6.73853	19.6467	14.3608	1.15718
597.2/1.1 (59617)	597.246	1.1	2.93447	0.0066	24.7186	1.7216	0	0	34.6212	7.88935	22.997	14.3579	1.15709
403.3/15.6 (34306)	403.287	15.64	5.0245	2.5936e-05	47.2958	3.30099	40.347	0	38.5588	9.02802	43.9949	14.3278	1.15618
471.3/1.1 (43903)	471.296	1.11	11.619	3.1771e-12	324.501	22.6552	337.974	4.70445	100.383	43.8387	301.845	14.3234	1.15605
575.1/6.2 (57271)	575.131	6.21	9.11225	7.1896e-10	246.519	17.2805	222.8	0	101.736	37.9735	229.239	14.2658	1.1543
600.3/1.1 (60012)	600.339	1.12	13.1331	1.7224e-13	738.152	52.1061	707.129	47.643	236.239	41.7683	686.046	14.1663	1.15126
425.3/15.7 (37356)	425.269	15.65	3.37585	0.00217	17.9109	1.27138	15.622	0	21.7279	5.04403	16.6395	14.0878	1.14884
336.2/3.8 (24120)	336.19	3.75	3.22796	0.00317	59.1987	4.20879	0	0	79.109	7.50638	54.9899	14.0655	1.14815
545.8/13.3 (53781)	545.799	13.27	5.1569	1.806e-05	18.7144	1.34721	15.876	0	15.0169	3.13543	17.3672	13.8912	1.14274
380.2/6.1 (31059)	380.22	6.11	9.24142	5.3315e-10	205.536	14.976	190.943	0	86.7309	27.2265	190.56	13.7243	1.13749
517.2/4.8 (50208)	517.247	4.82	2.77828	0.00965	14.7953	1.08118	0	0	22.5323	3.43865	13.7141	13.6844	1.13622
773.3/1.1 (73075)	773.317	1.11	7.63817	2.547e-08	74.9685	5.50157	64.1518	0	37.3605	13.0849	69.467	13.6268	1.13439
173.1/3.5 (9613)	173.091	3.53	3.81744	0.00068	28.5259	2.11809	6.19161	0	31.8924	3.90176	26.4078	13.4677	1.12929
783.4/6.4 (73599)	783.403	6.44	10.9998	1.1276e-11	24.2437	1.81968	27.4205	0	7.13712	4.03472	22.4241	13.3231	1.12461
554.2/1.1 (54839)	554.23	1.11	6.1435	1.245e-06	135.601	10.1976	159.278	0	81.0487	32.3642	125.404	13.2973	1.12376
467.3/4.0 (43296)	467.253	3.96	3.89804	0.00055	6.03228	0.463795	6.30632	0	5.80557	2.12538	5.56849	13.0063	1.11416
211.1/1.0 (11899)	211.109	1.02	3.90131	0.00055	24.4538	1.88084	24.842	0	25.5605	5.82573	22.573	13.0016	1.114
622.3/14.3 (62328)	622.323	14.32	3.30274	0.00262	7.48958	0.577872	0	0	8.8902	2.64814	6.9117	12.9606	1.11263
355.2/2.3 (27628)	355.199	2.33	3.16855	0.00369	40.9484	3.16296	0	0	51.0929	14.4945	37.7854	12.9462	1.11214
368.1/1.1 (29329)	368.105	1.14	3.85943	0.00061	24.5014	1.92453	17.21	0	26.3827	4.83735	22.5768	12.7311	1.10486
340.1/1.1 (24804)	340.102	1.08	8.17312	6.7533e-09	88.5513	7.03724	95.7162	0	40.9067	14.4214	81.5141	12.5832	1.09979
534.3/6.2 (52395)	534.296	6.16	2.9421	0.00648	14.4669	1.15096	0	0	20.6092	3.28319	13.316	12.5695	1.09932
769.4/4.4 (72881)	769.403	4.43	3.44297	0.00183	7.75996	0.618483	4.83022	0	9.40349	1.60523	7.14148	12.5468	1.09853
325.1/7.4 (22274)	325.121	7.43	11.0193	1.0828e-11	58.0971	4.65491	56.7691	0	17.9388	8.87345	53.4422	12.4808	1.09624
373.1/7.0 (30051)	373.061	6.96	3.43502	0.00187	148.471	11.9567	0	0	182.202	25.5243	136.514	12.4174	1.09403
341.1/12.6 (24996)	341.091	12.6	2.91073	0.007	1.94621	0.156782	0	0	2.65388	0.718465	1.78943	12.4135	1.09389
373.3/3.6 (30154)	373.28	3.61	3.92011	0.00052	35.2719	2.89842	33.0078	0	33.7877	12.0365	32.3735	12.1693	1.08527
468.7/4.1 (43487)	468.706	4.09	4.30782	0.00018	66.0726	5.46238	73.4596	0	64.9145	7.77475	60.6102	12.0959	1.08264
451.1/2.5 (40985)	451.104	2.49	3.54	0.00142	63.7133	5.27935	67.0417	0	70.6775	20.1267	58.4339	12.0684	1.08165
496.3/6.2 (47360)	496.312	6.18	13.5423	8.1668e-14	576.657	47.8224	619.267	30.8234	161.511	54.9151	528.835	12.0583	1.08129
383.2/2.5 (31426)	383.203	2.51	4.96523	3.0499e-05	426.874	35.4041	635.132	0	325.579	111.469	391.47	12.0572	1.08125
612.4/6.1 (61256)	612.372	6.08	8.80397	1.4807e-09	31.8984	2.64853	27.7302	0	14.0484	4.29088	29.2498	12.0438	1.08076
338.1/3.6 (24467)	338.106	3.56	12.5334	5.3027e-13	82.0282	6.84098	88.233	2.84377	24.7037	8.56142	75.1873	11.9907	1.07885
690.3/3.9 (67900)	690.332	3.92	3.49852	0.00158	7.59719	0.637816	8.0916	0	8.60298	2.30148	6.95938	11.9113	1.07596
387.3/1.5 (32065)	387.271	1.49	3.28048	0.00278	50.0579	4.25391	31.8262	0	61.9664	13.5484	45.804	11.7675	1.07068
319.2/14.5 (21568)	319.225	14.48	6.45948	5.3642e-07	26.1391	2.22779	21.7429	0	15.3281	5.18448	23.9113	11.7332	1.06942
487.2/5.0 (46085)	487.24	5.02	6.05967	1.5589e-06	245.626	20.9577	202.804	0	168.899	26.7135	224.669	11.7201	1.06893
358.3/7.1 (28063)	358.27	7.08	9.39482	3.7487e-10	35.7186	3.05284	32.8952	0	13.9347	5.38139	32.6658	11.7001	1.06819
288.2/3.4 (18399)	288.152	3.45	3.8895	0.00056	2.24441	0.191997	1.85602	0	2.05047	0.87984	2.05241	11.6898	1.06781
288.2/2.7 (18425)	288.19	2.67	4.01019	0.00041	34.9632	2.99569	26.999	0	33.4552	10.6195	31.9675	11.6711	1.06711
435.2/6.1 (38752)	435.207	6.1	6.41	6.1165e-07	25.9986	2.23561	23.4289	0	15.6649	4.80207	23.763	11.6293	1.06555
209.1/2.3 (11761)	209.092	2.33	3.75639	0.0008	134.019	11.5626	77.6175	0	141.29	37.2555	122.456	11.5907	1.06411
508.2/4.5 (48957)	508.25	4.5	3.60374	0.0012	30.903	2.68346	35.4363	0	33.6496	9.37616	28.2195	11.5161	1.0613
460.2/4.0 (42323)	460.166	4.01	2.90432	0.00711	13.0576	1.13911	2.76535	0	18.7002	2.94145	11.9185	11.463	1.0593
628.4/4.0 (62872)	628.364	3.99	2.78447	0.0095	4.92967	0.432174	0	0	7.22217	1.46512	4.4975	11.4067	1.05716
412.3/13.0 (35501)	412.322	13.03	2.88487	0.00745	1.60303	0.140656	0	0	2.15111	0.644566	1.46237	11.3968	1.05678
294.2/1.1 (18996)	294.156	1.14	3.1646	0.00372	498.236	43.7646	0	0	595.152	200.554	454.471	11.3845	1.05631
331.1/1.1 (23252)	331.125	1.07	3.75264	0.00081	10.4816	0.921073	7.30083	0	11.2436	2.58464	9.56051	11.3797	1.05613
586.3/6.3 (58508)	586.325	6.27	3.39288	0.00208	5.57575	0.490236	4.5213	0	6.07626	2.24654	5.08552	11.3736	1.0559
241.0/1.5 (14077)	240.968	1.52	3.13834	0.00398	14.372	1.26899	6.43276	0	18.9811	3.10417	13.103	11.3256	1.05406
202.1/3.0 (11327)	202.107	2.96	11.7606	2.3928e-12	120.534	10.7334	117.741	0	30.9026	19.6676	109.8	11.2298	1.05037
236.2/10.2 (13773)	236.162	10.2	3.50773	0.00155	18.407	1.68235	11.7974	0	21.6018	3.72185	16.7247	10.9412	1.03907
345.2/2.7 (25841)	345.214	2.69	6.14749	1.2317e-06	205.78	18.8754	158.638	0	127.557	40.5534	186.905	10.902	1.03751
526.3/1.1 (51350)	526.259	1.13	3.63571	0.00111	125.772	11.581	179.732	0	121.287	53.0708	114.191	10.8602	1.03584
453.2/5.3 (41345)	453.233	5.25	3.92252	0.00052	176.633	16.3832	149.143	0	181.908	38.5301	160.25	10.7813	1.03267
458.3/3.1 (42058)	458.26	3.13	6.61212	3.5838e-07	237.242	22.0556	230.118	11.2507	138.669	40.6189	215.186	10.7565	1.03167
293.1/1.3 (18885)	293.098	1.26	2.76629	0.00993	91.4937	8.51333	6.90991	0	133.937	27.5823	82.9804	10.7471	1.03129
445.2/6.4 (40243)	445.207	6.42	4.4692	0.00012	18.3873	1.71104	15.8661	0	16.368	3.9544	16.6763	10.7463	1.03126
472.2/7.8 (43953)	472.154	7.79	11.4105	4.8428e-12	138.423	12.9494	121.524	0	41.4793	19.4501	125.474	10.6896	1.02896
459.2/3.9 (42203)	459.234	3.91	2.88667	0.00742	167.904	15.7085	121.93	0	233.763	51.5725	152.196	10.6888	1.02893
465.2/2.7 (42997)	465.209	2.7	5.11064	2.0494e-05	39.155	3.66695	41.0466	0	30.0899	7.94511	35.488	10.6778	1.02848
382.2/4.4 (31336)	382.244	4.39	5.2752	1.3074e-05	81.0813	7.5967	59.7087	0	60.0425	16.416	73.4846	10.6732	1.0283
572.3/1.1 (56928)	572.277	1.11	4.34153	0.00017	85.3609	8.17567	144.884	0	81.1108	12.4957	77.1852	10.4408	1.01874
314.1/2.7 (20903)	314.135	2.73	3.31037	0.00257	7.08814	0.679562	6.32882	0	7.64153	3.11415	6.40858	10.4305	1.0183
374.2/4.2 (30275)	374.228	4.24	4.84879	4.1933e-05	280.714	26.9449	194.783	0	234.215	47.0779	253.77	10.4181	1.01779
290.1/7.0 (18590)	290.108	6.97	4.031	0.00039	229.666	22.0672	296.843	0	224.897	56.2296	207.599	10.4076	1.01735
471.3/6.2 (43897)	471.285	6.16	4.64778	7.2621e-05	99.5093	9.60517	111.104	0	84.3331	21.3388	89.9041	10.36	1.01536
245.2/14.2 (14526)	245.226	14.22	2.84645	0.00818	11.3455	1.11353	5.47838	0	16.1847	3.03121	10.232	10.1887	1.00812
390.2/2.5 (32442)	390.188	2.47	3.94771	0.00048	86.049	8.47144	106.262	0	69.2384	38.5806	77.5776	10.1575	1.00679
484.3/5.3 (45683)	484.312	5.33	5.69649	4.1542e-06	923.268	91.0771	781.905	0	659.333	119.779	832.191	10.1372	1.00592
409.3/13.2 (35047)	409.28	13.15	3.58888	0.00125	12.7739	1.2604	9.36716	0	13.4667	4.27029	11.5136	10.1349	1.00582
436.6/3.8 (38954)	436.631	3.77	11.6066	3.2573e-12	86.9235	8.58417	83.8369	0	25.2247	12.1366	78.3394	10.126	1.00544
391.1/6.7 (32539)	391.069	6.74	3.15027	0.00386	15.3014	1.51126	0	0	19.112	4.78565	13.7901	10.1249	1.00539
706.2/7.0 (69017)	706.155	6.97	3.30774	0.00259	17.7508	1.75619	12.3311	0	21.4909	4.63542	15.9946	10.1076	1.00465
726.3/5.6 (70356)	726.321	5.6	4.23837	0.00022	32.3019	3.26613	42.1452	0	30.8738	5.71538	29.0358	9.88997	0.995195
509.2/4.9 (49085)	509.219	4.93	4.18711	0.00025	79.3623	8.02938	68.7995	0	77.6867	12.0744	71.333	9.884	0.994933
429.2/3.7 (37923)	429.234	3.71	4.59213	8.4527e-05	360.307	36.4717	427.267	0	258.303	131.049	323.835	9.87908	0.994716
358.2/3.3 (28023)	358.196	3.3	3.7658	0.00078	179.17	18.2398	144.844	0	162.022	74.8807	160.93	9.82302	0.992245
424.2/7.8 (37143)	424.155	7.81	9.27392	4.9468e-10	61.543	6.26531	52.3934	0	22.2372	10.75	55.2777	9.82283	0.992237
681.3/4.8 (67233)	681.345	4.78	6.9781	1.3763e-07	246.303	25.1011	222.168	0	135.89	38.4242	221.202	9.81247	0.991778
304.2/4.5 (19898)	304.168	4.49	3.24662	0.00303	10.8455	1.111	7.37319	0	12.8746	3.60426	9.73453	9.76194	0.989536
282.2/6.9 (17819)	282.183	6.88	3.83309	0.00066	49.3288	5.07463	60.2252	0	39.8391	23.2549	44.2542	9.72067	0.987696
174.1/2.4 (9661)	174.055	2.37	3.38156	0.00214	4.05413	0.417129	2.76077	0	4.81384	0.966225	3.637	9.71912	0.987627
401.3/4.1 (34005)	401.287	4.07	3.60537	0.0012	40.7003	4.24248	23.7266	0	42.4692	13.4325	36.4578	9.59353	0.981978
321.2/6.1 (21790)	321.183	6.15	4.83774	4.322e-05	3.56791	0.372243	3.54458	0	2.80221	0.841242	3.19566	9.58488	0.981587
309.1/6.6 (20393)	309.129	6.63	3.06652	0.00476	20673.1	2157.86	6.63094	0	24532.9	8988.54	18515.2	9.58038	0.981383
359.2/1.1 (28212)	359.243	1.12	5.41891	8.8345e-06	779.656	82.174	831.131	0	372.003	301.273	697.482	9.48786	0.977168
452.2/9.2 (41165)	452.185	9.15	6.18082	1.1266e-06	52.4307	5.6133	60.1232	0	32.9674	8.44444	46.8174	9.34045	0.970368
477.3/6.3 (44652)	477.271	6.25	4.87865	3.8646e-05	41.5374	4.47666	40.1131	0	33.8262	7.1618	37.0607	9.27865	0.967485
376.2/7.8 (30519)	376.189	7.81	5.12036	1.9957e-05	55.3861	5.97403	78.7262	0	41.6975	11.2199	49.412	9.27113	0.967133
346.2/3.1 (25973)	346.196	3.11	5.94178	2.1406e-06	297.723	32.2759	256.049	0	189.435	56.9998	265.447	9.22431	0.964934
682.3/5.5 (67271)	682.286	5.51	3.77282	0.00077	72.1426	7.82096	55.3579	0	78.1364	11.0219	64.3217	9.22427	0.964932
619.3/7.0 (61979)	619.272	7.05	5.64828	4.7346e-06	115.885	12.5832	113.397	0	71.8144	29.7872	103.302	9.20947	0.964235
586.3/1.1 (58467)	586.282	1.14	2.99944	0.00563	80.7915	8.77708	10.7043	0	96.7788	36.5757	72.0144	9.20482	0.964015
511.3/3.8 (49424)	511.291	3.84	3.45259	0.00178	7.32587	0.807366	3.85676	0	8.15498	2.19952	6.5185	9.07379	0.957789
460.2/12.7 (42334)	460.191	12.72	3.66204	0.00103	11.3902	1.26078	7.1396	0	11.5983	3.69787	10.1294	9.03424	0.955892
440.1/6.9 (39437)	440.149	6.93	8.50609	3.0118e-09	407.48	45.3551	410.543	0	146.138	86.2723	362.124	8.9842	0.95348
482.2/5.4 (45270)	482.162	5.42	4.30782	0.00018	116.336	12.9744	104.085	0	105.913	24.304	103.361	8.96655	0.952625
107.0/4.1 (5911)	107.049	4.11	8.84426	1.3463e-09	80.5845	9.04834	74.6979	0	28.3073	16.0158	71.5362	8.90601	0.949683
216.0/9.1 (12245)	215.979	9.14	2.83841	0.00834	5.40511	0.607246	0	0	7.24306	2.0533	4.79787	8.90102	0.94944
227.1/2.6 (12963)	227.078	2.63	3.71901	0.00089	98.011	11.0354	61.3906	0	98.546	30.6512	86.9756	8.8815	0.948486
792.7/7.8 (74111)	792.658	7.81	3.17876	0.00359	11.6222	1.31208	10.6964	0	12.9428	5.07739	10.3102	8.85789	0.94733
330.2/5.3 (23188)	330.238	5.33	6.27154	8.8415e-07	343.213	38.8193	314.536	2.32251	204.575	63.5387	304.394	8.8413	0.946516
458.2/2.8 (42038)	458.222	2.85	4.75707	5.3881e-05	50.5632	5.72321	53.1778	0	41.2562	10.1399	44.84	8.83477	0.946195
336.1/3.1 (24085)	336.142	3.06	3.55384	0.00137	28.7617	3.25815	27.7394	0	30.0249	9.67635	25.5036	8.82762	0.945844
560.3/5.9 (55647)	560.329	5.93	7.43996	4.2037e-08	88.6268	10.0583	74.4608	0	39.7093	18.7852	78.5685	8.8113	0.94504
410.1/7.2 (35122)	410.137	7.15	9.36227	4.0386e-10	420.227	47.6975	430.596	0	132.73	83.1728	372.53	8.81025	0.944988
324.3/13.2 (22213)	324.272	13.21	4.35004	0.00016	6.6828	0.760237	5.95074	0	5.69116	1.84219	5.92256	8.79042	0.94401
607.2/13.8 (60690)	607.209	13.76	2.81747	0.00878	60.5386	6.91335	0	0	74.0176	31.681	53.6253	8.75677	0.942344
537.4/13.4 (52753)	537.397	13.39	3.05321	0.00492	52.9633	6.11505	11.5583	0	67.8212	15.384	46.8483	8.66114	0.937575
700.4/3.8 (68577)	700.351	3.83	6.67832	3.011e-07	304.082	35.1584	305.127	7.11	155.409	68.1259	268.924	8.64893	0.936963
336.1/6.9 (24065)	336.113	6.89	3.59817	0.00122	21.1341	2.4498	21.7374	0	19.3803	9.35885	18.6843	8.62688	0.935854
158.1/3.0 (8670)	158.082	3.02	3.37337	0.00219	11.4104	1.32619	6.93604	0	13.0421	3.28316	10.0842	8.60389	0.934695
220.1/2.9 (12590)	220.118	2.94	10.2163	5.9889e-11	1838.63	215.86	1821.33	0	431.809	384.644	1622.77	8.51768	0.930321
481.2/6.7 (45131)	481.175	6.68	6.45062	5.4917e-07	239.515	28.3168	265.652	0	127.281	54.5389	211.199	8.45841	0.927289
600.3/3.5 (59999)	600.334	3.46	3.08116	0.00459	74.1215	8.76748	63.8082	0	95.6248	17.6206	65.3541	8.45414	0.92707
157.1/4.7 (8622)	157.097	4.7	3.57607	0.00129	29.5697	3.50324	22.1313	0	31.2605	8.81655	26.0665	8.44067	0.926377
330.2/4.1 (23164)	330.202	4.06	3.30289	0.00262	327.667	38.9945	191.536	29.6957	403.645	46.9244	288.672	8.4029	0.924429
459.2/3.3 (42186)	459.208	3.32	12.2789	8.6468e-13	259.044	30.9594	250.959	20.7859	64.054	37.4446	228.084	8.3672	0.92258
482.3/5.4 (45343)	482.27	5.36	4.54883	9.5122e-05	234.564	28.0496	224.525	0	196.256	52.6537	206.515	8.36247	0.922335
324.0/1.3 (22114)	324.011	1.31	3.97124	0.00045	11.1409	1.33591	11.27	0	10.4364	3.19358	9.80498	8.33956	0.921143
322.2/3.6 (21902)	322.175	3.56	6.51858	4.5875e-07	137.429	16.5348	115.302	0	73.5326	29.5111	120.895	8.31153	0.919681
255.1/1.0 (15317)	255.14	1.03	3.14467	0.00392	40.1276	4.85164	56.5114	0	39.2292	22.233	35.276	8.27094	0.917555
325.0/3.2 (22247)	325.034	3.21	4.05243	0.00037	81.2915	9.84861	47.7075	7.98018	80.9571	10.9393	71.4429	8.25411	0.91667
346.2/5.7 (26007)	346.233	5.69	4.80071	4.7823e-05	181.148	22.0729	209.11	0	138.14	45.2891	159.075	8.20682	0.914175
362.2/4.0 (28587)	362.177	3.97	2.83045	0.00851	9.94488	1.21924	9.51094	0	11.4677	5.58728	8.72563	8.1566	0.911509
424.2/5.2 (37134)	424.151	5.18	3.1987	0.00342	142.818	17.618	12.766	0	172.406	40.2847	125.2	8.10637	0.908826
169.1/2.6 (9402)	169.096	2.57	3.40938	0.00199	68.2699	8.42391	80.7379	0	67.1772	30.2076	59.8459	8.1043	0.908715
339.2/1.1 (24700)	339.164	1.09	9.9104	1.1736e-10	69.1068	8.58141	67.0551	0	18.3184	13.9552	60.5253	8.05308	0.905962
329.6/4.5 (23034)	329.641	4.48	6.49897	4.8317e-07	39.7152	4.94661	36.2174	0	21.9426	7.73608	34.7686	8.02877	0.904649
716.4/7.7 (69724)	716.432	7.67	4.71002	6.1271e-05	34.0498	4.24142	20.1799	0	27.7108	6.7903	29.8084	8.02793	0.904603
261.1/3.6 (15820)	261.138	3.61	4.50865	0.00011	177.699	22.1433	244.144	0	136.634	55.0594	155.556	8.02499	0.904445
357.2/14.2 (27864)	357.174	14.22	2.86248	0.00787	11.308	1.41542	7.72088	0	14.6052	4.47426	9.89262	7.9892	0.902503
286.3/13.3 (18260)	286.31	13.31	4.02579	0.00039	8.59108	1.07704	9.12216	0	3.9894	4.93562	7.51404	7.97656	0.901815
218.1/2.3 (12433)	218.08	2.27	4.56259	9.1618e-05	144.996	18.2296	175.722	0	120.737	31.2667	126.767	7.95388	0.900579
701.4/7.2 (68682)	701.392	7.17	3.01809	0.00537	8.83938	1.1141	5.5026	0	9.68578	4.50129	7.72528	7.93409	0.899497
358.3/6.5 (28062)	358.269	6.5	6.06792	1.5247e-06	88.7305	11.2663	88.406	0	48.0874	22.6381	77.4642	7.87574	0.896291
180.1/4.2 (10045)	180.101	4.24	6.88077	1.7726e-07	613.588	77.9938	585.685	0.860133	111.938	220.063	535.594	7.86714	0.895817
380.2/7.1 (31027)	380.188	7.1	7.28184	6.2912e-08	19.114	2.42962	19.2745	0	7.8609	4.646	16.6844	7.86709	0.895814
521.3/1.1 (50737)	521.283	1.12	5.40546	9.1643e-06	482.958	61.4941	469.83	0	310.449	122.753	421.464	7.85374	0.895077
342.2/5.9 (25359)	342.241	5.88	6.98531	1.3508e-07	1223.37	155.814	1032.66	3.54218	581.459	266.024	1067.56	7.85151	0.894953
737.3/13.2 (71034)	737.267	13.16	2.91123	0.00699	11.0032	1.41343	0	0	13.3722	4.9172	9.58978	7.78474	0.891244
247.1/6.2 (14636)	247.108	6.2	15.7264	1.9891e-15	86.8953	11.2096	84.9463	10.4885	15.4535	10.4289	75.6857	7.75184	0.889405
454.2/7.6 (41435)	454.167	7.55	11.5506	3.646e-12	355.446	45.9965	364.168	32.1076	103.557	45.1765	309.45	7.72769	0.88805
121.1/4.2 (6634)	121.065	4.24	6.58463	3.8532e-07	335.878	43.697	320.834	0	58.6364	126.456	292.181	7.68653	0.88573
472.2/1.1 (43957)	472.19	1.11	3.00097	0.0056	34.4042	4.50957	0	0	43.8048	10.3781	29.8946	7.62915	0.882476
205.1/4.0 (11577)	205.096	4.04	5.45547	7.9972e-06	82.1905	10.8447	108.297	0	51.2579	21.3902	71.3459	7.5789	0.879606
617.3/4.7 (61772)	617.312	4.65	4.4168	0.00014	91.9369	12.3002	92.2791	0	79.4216	18.5532	79.6367	7.47445	0.873579
440.6/3.8 (39545)	440.634	3.82	2.76736	0.0099	6.57268	0.88203	3.43397	0	8.45724	2.94719	5.69065	7.45176	0.872259
452.2/8.7 (41164)	452.185	8.74	7.86342	1.4499e-08	218.247	29.4742	257.981	20.8826	96.8404	36.4945	188.773	7.4047	0.869507
290.2/3.7 (18622)	290.169	3.65	3.64087	0.00109	9.8728	1.35834	10.6023	0	9.30156	3.69168	8.51446	7.26831	0.861433
419.3/4.7 (36528)	419.25	4.65	4.33715	0.00017	65.2104	9.00418	54.0989	0	53.0989	18.8003	56.2062	7.24223	0.859873
227.1/4.5 (13006)	227.138	4.54	4.09407	0.00033	17.8995	2.47575	19.0407	0	13.057	7.54894	15.4237	7.22992	0.859134
369.2/1.0 (29542)	369.212	1	3.52805	0.00147	54.0098	7.48959	65.9229	0	48.7847	24.1146	46.5202	7.21132	0.858015
355.2/14.2 (27608)	355.178	14.22	3.39478	0.00207	32.7249	4.53887	24.7597	0	36.2628	9.05633	28.186	7.20991	0.85793
772.5/13.3 (73045)	772.461	13.27	3.2276	0.00318	19.1734	2.68095	16.5413	0	20.7469	7.62359	16.4924	7.1517	0.85441
563.3/1.2 (55939)	563.25	1.17	2.87168	0.0077	81.6899	11.4303	104.129	0	79.6242	52.3803	70.2596	7.14678	0.85411
496.0/9.1 (47281)	496.025	9.14	5.50785	6.9343e-06	114.187	16.0378	120.368	0	59.6589	37.1089	98.1487	7.11983	0.85247
327.1/6.1 (22617)	327.109	6.12	6.11212	1.3542e-06	9.21042	1.29665	10.3684	0	5.09003	2.10301	7.91377	7.10324	0.851457
449.8/13.3 (40838)	449.763	13.28	2.78097	0.00958	35.8692	5.0965	13.3796	0	43.5034	17.9705	30.7727	7.038	0.847449
335.1/3.6 (23903)	335.108	3.63	19.306	1.0222e-17	9573.24	1368.46	9824.53	1466.57	1153.08	1030.13	8204.78	6.99563	0.844827
516.2/13.2 (50036)	516.242	13.19	4.04762	0.00037	15.1209	2.1647	13.5889	0	11.568	6.06985	12.9562	6.98523	0.84418
589.8/13.3 (58868)	589.823	13.28	3.61031	0.00118	6.53291	0.942548	5.8385	0	5.43197	3.05696	5.59036	6.93111	0.840803
318.2/4.6 (21423)	318.202	4.61	4.92154	3.437e-05	274.743	39.7503	208.075	0	199.333	64.9219	234.993	6.91172	0.839586
675.3/3.4 (66727)	675.28	3.36	3.24921	0.00301	99.9792	14.5194	99.6839	0	103.908	42.2224	85.4598	6.8859	0.837961
452.2/1.1 (41175)	452.212	1.13	3.24835	0.00301	101.349	14.8746	129.118	0	99.9042	47.52	86.4739	6.81353	0.833372
509.2/5.9 (49084)	509.219	5.94	10.7675	1.8355e-11	200.91	29.596	189.633	21.2203	54.7355	32.1603	171.314	6.78841	0.831768
146.1/6.4 (7979)	146.061	6.37	10.3202	4.7778e-11	80.5491	11.9303	81.1769	5.18295	19.9565	15.1861	68.6188	6.75164	0.82941
427.2/3.9 (37571)	427.208	3.87	2.77699	0.00968	81.7229	12.1717	4.99836	0	101.713	37.3417	69.5513	6.71419	0.826994
494.3/4.1 (47101)	494.272	4.05	3.16159	0.00375	14.8935	2.22371	8.91583	0	16.3775	5.86124	12.6697	6.69756	0.825917
509.2/5.4 (49083)	509.219	5.42	7.67121	2.344e-08	178.091	26.7053	150.648	0	74.8617	34.5423	151.386	6.66876	0.824045
529.3/6.7 (51798)	529.275	6.74	3.84338	0.00064	61.5828	9.2986	70.8511	0	55.2373	20.2921	52.2842	6.62281	0.821042
404.2/7.4 (34366)	404.182	7.44	4.84642	4.2206e-05	45.5815	6.89993	52.5618	0	32.256	12.0702	38.6816	6.60608	0.819944
487.2/4.7 (46087)	487.242	4.7	5.93568	2.1761e-06	89.128	13.5148	107.875	0	51.4477	19.301	75.6132	6.59486	0.819205
771.5/13.3 (72996)	771.451	13.25	3.98114	0.00044	19.4371	2.98893	25.9987	0	16.6326	6.31629	16.4482	6.50303	0.813116
146.1/5.1 (7971)	146.06	5.09	6.11365	1.3487e-06	82.2923	12.6724	76.4258	0	42.0898	20.86	69.6199	6.49382	0.8125
630.3/13.2 (63010)	630.3	13.21	3.234	0.00312	18.1435	2.80653	9.25393	0	19.6948	6.57352	15.337	6.46473	0.810551
513.3/5.9 (49647)	513.303	5.92	8.88949	1.2103e-09	131.142	20.3157	142.704	8.69572	41.6907	25.9928	110.826	6.4552	0.809909
469.2/12.6 (43547)	469.195	12.63	3.57404	0.0013	11.092	1.73478	8.61513	0	11.4821	2.77868	9.35725	6.39392	0.805767
314.1/1.0 (20882)	314.077	1.03	2.98646	0.00581	25.5586	4.00594	8.21745	0	30.9091	8.78726	21.5527	6.38018	0.804833
176.1/6.9 (9797)	176.07	6.93	10.1584	6.7953e-11	586.764	92.1967	552.432	43.1214	114.211	125.252	494.567	6.36426	0.803748
728.4/13.2 (70518)	728.436	13.24	4.66221	6.9817e-05	26.602	4.20382	25.1899	0	16.3018	9.86259	22.3982	6.32807	0.801271
269.1/1.5 (16548)	269.103	1.52	2.79746	0.00921	10.1324	1.6076	7.78481	0	10.7521	5.97183	8.52482	6.30283	0.799536
146.1/2.6 (7973)	146.06	2.59	3.35042	0.00232	297.926	47.3328	446.615	0	247.355	157.693	250.593	6.29428	0.798946
221.1/2.6 (12623)	221.091	2.6	3.60415	0.0012	140.156	22.2821	173.516	0	113.91	65.1447	117.874	6.29007	0.798655
353.2/12.9 (27320)	353.194	12.94	3.33811	0.00239	13.1755	2.10186	15.9161	0	12.9879	5.43941	11.0736	6.26848	0.797162
338.1/2.9 (24492)	338.134	2.9	4.00144	0.00042	91.3365	14.6094	95.96	10.7267	85.1712	18.4728	76.7271	6.2519	0.796012
518.3/13.3 (50365)	518.312	13.3	2.8066	0.00901	32.3139	5.18328	2.88666	0	38.8653	14.8318	27.1306	6.23426	0.794785
160.0/6.9 (8801)	160.042	6.94	6.54728	4.2524e-07	694.067	111.447	643.404	0	233.532	219.151	582.62	6.22778	0.794333
701.4/5.7 (68675)	701.356	5.68	3.84942	0.00063	117.015	18.9941	124.317	0	81.9487	55.0696	98.0205	6.16059	0.789622
178.1/4.6 (9931)	178.086	4.58	4.45896	0.00012	79.168	12.853	104.868	0	60.2336	22.3521	66.315	6.15952	0.789547
539.2/12.6 (52927)	539.177	12.62	3.47969	0.00166	21.207	3.50406	22.5327	0	21.0983	7.08732	17.703	6.05213	0.781908
684.4/13.2 (67471)	684.408	13.24	3.11523	0.00422	13.9415	2.31385	11.9676	0	14.6575	6.07783	11.6276	6.02524	0.779974
664.4/6.2 (65944)	664.356	6.16	2.81181	0.0089	11.9971	1.99529	10.0624	0	14.2259	5.536	10.0018	6.01272	0.779071
133.1/13.9 (7316)	133.065	13.91	3.11677	0.0042	1.39828	0.235179	1.24573	0	1.30049	0.74281	1.1631	5.9456	0.774196
252.0/1.4 (15032)	252.038	1.38	4.8672	3.9875e-05	217.207	36.543	207.005	25.0444	165.674	34.249	180.664	5.94387	0.774069
398.1/2.9 (33452)	398.14	2.89	4.64496	7.3182e-05	86.5881	14.6155	106.513	0	59.1822	26.7687	71.9726	5.9244	0.772644
376.2/6.2 (30536)	376.223	6.23	7.26125	6.6317e-08	221.528	37.481	221.294	0	68.9816	61.3431	184.047	5.91041	0.771617
352.1/1.1 (26981)	352.065	1.08	3.06235	0.00481	22.4947	3.80899	24.9008	0	24.0866	9.81397	18.6857	5.90568	0.77127
523.8/13.3 (51036)	523.786	13.27	3.3287	0.00245	17.6036	2.99089	16.3305	0	18.3806	5.90207	14.6127	5.88574	0.769801
697.2/13.0 (68326)	697.235	13.03	3.6753	0.001	23.946	4.09388	31.7971	0	19.7599	10.0574	19.8521	5.84922	0.767098
288.2/4.7 (18429)	288.192	4.7	5.19175	1.642e-05	238.189	40.9131	182.82	0.305923	136.674	72.5454	197.276	5.82182	0.765059
507.2/5.0 (48759)	507.209	4.96	3.09925	0.00439	58.8044	10.2484	49.2599	0	51.322	33.3367	48.556	5.73792	0.758754
449.2/5.6 (40756)	449.203	5.6	3.22319	0.00321	56.1375	9.80537	45.8802	0	56.5675	23.2922	46.3322	5.72518	0.757789
291.1/6.0 (18699)	291.133	6.05	5.74567	3.636e-06	104.861	18.3393	117.915	0	53.3534	29.3494	86.5215	5.71781	0.75723
170.1/1.1 (9447)	170.08	1.1	6.1738	1.148e-06	73.0072	12.7841	79.358	0	33.6988	19.6215	60.2231	5.7108	0.756697
357.1/6.9 (27826)	357.088	6.94	8.51752	2.9303e-09	1055.35	185.008	1086.96	68.5988	256.201	256.586	870.342	5.70434	0.756205
376.1/6.6 (30463)	376.138	6.55	2.80326	0.00908	28.8904	5.07416	0	0	35.9286	10.9673	23.8162	5.69362	0.755389
499.2/1.1 (47708)	499.214	1.12	4.32499	0.00017	138.191	24.309	172.622	0	83.3969	57.7335	113.882	5.68477	0.754713
357.2/2.7 (27914)	357.248	2.73	2.84769	0.00816	17.5877	3.09946	12.6164	0	21.4979	6.591	14.4883	5.67445	0.753924
537.3/1.1 (52711)	537.28	1.12	2.97493	0.00598	174.848	30.8609	284.428	0	164.796	98.9878	143.987	5.6657	0.753253
385.2/4.4 (31726)	385.246	4.38	3.03081	0.0052	67.916	12.001	43.0087	8.10146	83.696	14.1409	55.915	5.6592	0.752755
572.3/13.1 (56922)	572.26	13.08	5.81491	3.0148e-06	78.195	13.8506	82.1238	4.37679	35.3905	24.0616	64.3444	5.6456	0.75171
689.0/8.2 (67787)	689.025	8.2	2.8097	0.00894	12.8985	2.28518	5.90535	0	16.5408	4.05099	10.6133	5.64441	0.751619
362.2/5.5 (28615)	362.207	5.47	3.33068	0.00244	50.3701	8.95097	39.433	0	53.7055	14.5004	41.4192	5.62734	0.750303
421.2/3.8 (36694)	421.164	3.75	3.06051	0.00483	172.977	30.7616	140.707	26.2781	211.009	35.1381	142.215	5.62313	0.749978
192.1/6.3 (10721)	192.101	6.28	3.82205	0.00068	4.20782	0.749493	5.13643	0	3.50509	1.51886	3.45833	5.61423	0.74929
242.1/6.7 (14166)	242.102	6.66	2.76576	0.00994	3.66293	0.655124	2.63878	0	4.69976	1.26341	3.0078	5.59119	0.747504
534.0/1.6 (52330)	534.024	1.65	3.12627	0.0041	71.2018	12.772	36.6185	0	74.3896	29.452	58.4298	5.57484	0.746232
491.4/13.3 (46694)	491.38	13.31	3.94064	0.00049	11.7513	2.10846	14.5514	0	9.03504	4.49005	9.64283	5.57341	0.746121
586.3/13.8 (58462)	586.273	13.83	9.95797	1.0562e-10	117.725	21.1586	115.946	15.7614	22.0971	25.1818	96.5667	5.56394	0.745382
162.1/5.9 (9009)	162.091	5.94	5.93269	2.1937e-06	11.915	2.18506	10.8002	0	5.46601	3.43115	9.72991	5.45293	0.73663
590.4/13.3 (58940)	590.368	13.34	4.88358	3.8129e-05	20.8105	3.83436	24.9707	0	12.873	6.34769	16.9762	5.42738	0.73459
361.7/4.0 (28502)	361.671	4	4.48303	0.00011	55.1125	10.3767	66.8003	0	37.1718	18.044	44.7357	5.31116	0.72519
321.2/1.1 (21778)	321.174	1.11	3.29581	0.00267	31.1937	5.89561	27.3642	0	33.5229	8.37523	25.298	5.291	0.723538
625.2/13.2 (62546)	625.213	13.22	3.3131	0.00255	12.921	2.44844	14.0121	0	11.9945	5.52992	10.4726	5.27725	0.722407
400.3/13.2 (33850)	400.341	13.19	4.26601	0.00021	35.6129	6.75918	42.2405	0	25.6579	11.8387	28.8538	5.26883	0.721714
485.3/13.3 (45837)	485.273	13.27	3.42109	0.00193	7.53462	1.448	9.00203	0	6.23331	3.51808	6.08662	5.20346	0.716292
120.1/2.5 (6581)	120.081	2.52	3.91419	0.00053	6979.69	1345.59	9363.75	0	4181.36	3358.65	5634.11	5.1871	0.714924
481.2/5.4 (45153)	481.211	5.41	5.53065	6.5173e-06	475.718	92.7023	430.928	0	176.71	172.656	383.015	5.13167	0.710259
480.3/13.2 (45056)	480.294	13.18	4.22785	0.00023	24.1738	4.72437	32.9923	0	17.4713	8.03479	19.4494	5.11682	0.709
611.3/4.4 (61131)	611.257	4.39	3.7119	0.0009	35.2206	7.00334	30.136	0	31.392	10.7474	28.2172	5.02911	0.701491
681.4/13.4 (67244)	681.381	13.39	3.81736	0.00068	14.4226	2.87738	17.8424	0	9.40668	6.72918	11.5452	5.01239	0.700045
581.3/4.7 (57981)	581.293	4.7	4.74087	5.632e-05	196.098	39.5128	140.323	0	132.817	50.6522	156.585	4.9629	0.695736
345.1/1.0 (25769)	345.144	1.04	2.7697	0.00985	126.917	25.6293	41.0168	0	136.094	66.2331	101.288	4.95202	0.694783
323.2/13.3 (22016)	323.161	13.26	5.35473	1.0524e-05	31.6533	6.44291	37.3963	2.39499	16.0985	9.58325	25.2104	4.9129	0.691338
414.1/1.7 (35712)	414.077	1.66	3.24902	0.00301	50.8957	10.4529	42.6805	0	47.8069	21.2702	40.4429	4.86907	0.687446
488.3/11.1 (46274)	488.3	11.06	4.05648	0.00036	34.4137	7.16799	23.704	0	26.1673	11.1357	27.2457	4.80103	0.681334
328.2/5.9 (22826)	328.222	5.94	4.81706	4.5733e-05	13.1001	2.76589	14.5165	2.37181	8.53007	3.38955	10.3342	4.73631	0.675441
603.9/13.3 (60365)	603.851	13.27	3.93097	0.00051	25.3767	5.35907	28.3564	0	16.657	10.8505	20.0176	4.73528	0.675346
355.2/2.9 (27602)	355.16	2.86	3.60624	0.00119	112.244	23.734	158.852	0	78.5495	53.3391	88.5101	4.72925	0.674793
290.2/13.0 (18637)	290.209	13	2.79209	0.00933	6.36119	1.34523	2.75848	0	7.26156	2.71539	5.01596	4.7287	0.674742
394.2/3.8 (32983)	394.197	3.79	3.39145	0.00209	341.159	72.4039	354.112	0	313.942	126.348	268.755	4.71189	0.673195
683.4/13.3 (67388)	683.399	13.26	3.13991	0.00396	21.1966	4.51594	18.4394	0	19.7945	9.60174	16.6807	4.69373	0.671518
748.5/13.4 (71715)	748.504	13.4	3.61441	0.00117	23.6613	5.0666	29.9587	0	16.0361	11.427	18.5947	4.67005	0.669322
428.1/1.0 (37685)	428.126	1.04	4.59547	8.3763e-05	52.8786	11.3363	62.5769	0	37.0252	13.1306	41.5422	4.66453	0.668807
332.2/5.8 (23502)	332.218	5.78	6.95699	1.4538e-07	425.174	91.5661	406.97	107.672	168.124	94.7375	333.608	4.64335	0.666832
229.2/3.3 (13262)	229.154	3.31	3.82948	0.00066	1213.79	264.37	1705.13	0	931.539	441.613	949.417	4.59124	0.66193
620.3/6.4 (62087)	620.292	6.4	6.0623	1.5479e-06	94.4216	20.6003	110.052	11.5192	40.7629	25.3615	73.8213	4.58351	0.661198
215.1/4.2 (12149)	215.081	4.17	4.43291	0.00013	56.9777	12.4958	60.1699	6.61116	38.8755	16.8396	44.4819	4.55976	0.658942
215.1/3.3 (12214)	215.137	3.29	3.30635	0.0026	50.0085	11.0018	69.7742	0	39.3123	24.686	39.0067	4.54547	0.657579
350.2/3.8 (26654)	350.18	3.84	2.85089	0.0081	44.9012	9.91242	42.491	0	48.474	19.7136	34.9888	4.52979	0.656078
301.1/3.8 (19561)	301.117	3.76	4.72566	5.8708e-05	32.674	7.23359	33.2944	0	19.3597	10.281	25.4404	4.51698	0.654848
368.0/1.0 (29320)	368.024	1.03	4.03646	0.00038	74.0137	16.4245	76.2861	0	44.1118	31.8906	57.5892	4.5063	0.65382
322.2/5.2 (21909)	322.176	5.19	3.92309	0.00052	204.742	45.6122	163.894	5.15752	146.943	76.6458	159.129	4.48875	0.652125
328.1/2.7 (22767)	328.137	2.73	3.70443	0.00092	1003.61	224.428	1130.24	0	423.415	564.356	779.177	4.47184	0.650486
227.2/3.7 (13040)	227.175	3.65	3.17512	0.00363	12.0575	2.70491	11.9148	0	9.48523	6.36702	9.35261	4.45764	0.649105
432.2/3.6 (38382)	432.245	3.61	3.92401	0.00051	48.5728	10.9907	49.3227	0	33.3182	19.1049	37.5821	4.41944	0.645368
643.2/6.9 (64053)	643.226	6.91	4.32961	0.00017	178.067	40.7707	173.552	0	98.0813	70.8617	137.297	4.36754	0.640237
264.2/12.4 (16138)	264.193	12.41	4.9348	3.3146e-05	33.2828	7.6342	39.6653	4.19802	18.9984	9.6895	25.6486	4.35969	0.639456
261.1/10.6 (15792)	261.108	10.63	4.08144	0.00034	24.8347	5.69986	24.6825	3.7886	19.2774	6.72405	19.1348	4.35706	0.639194
341.1/6.0 (25082)	341.122	6.05	6.47932	5.0897e-07	47.7137	10.9764	45.9522	0	9.06505	15.8328	36.7373	4.34693	0.638183
162.1/1.1 (8990)	162.075	1.11	4.5016	0.00011	22.9917	5.32427	28.2432	0	14.2542	7.38805	17.6674	4.31828	0.635311
365.3/12.3 (29001)	365.277	12.27	3.17858	0.00359	30.9786	7.24086	34.4321	0	29.6024	11.8906	23.7377	4.2783	0.631271
312.2/1.0 (20723)	312.168	1.04	9.31385	4.5129e-10	291.515	68.1989	268.799	47.8284	47.1425	64.6648	223.316	4.27449	0.630884
410.2/4.2 (35152)	410.178	4.18	6.1333	1.2795e-06	561.646	132.316	545.321	0	217.853	155.672	429.33	4.24472	0.627849
425.1/12.4 (37270)	425.134	12.35	3.30381	0.00261	19.8132	4.70864	13.6334	0	18.7146	6.65276	15.1045	4.20783	0.624059
235.1/2.8 (13699)	235.107	2.75	3.40978	0.00199	24.7788	5.89165	27.7381	0	16.6928	12.6156	18.8872	4.20575	0.623843
409.2/12.4 (34968)	409.16	12.35	2.98756	0.00579	13.2384	3.15218	8.72688	0	13.6006	5.15161	10.0862	4.19976	0.623225
286.1/3.5 (18210)	286.139	3.54	4.32941	0.00017	48.0698	11.4601	48.0252	0	22.4475	20.715	36.6096	4.19452	0.622682
442.3/5.3 (39818)	442.265	5.32	5.2436	1.4252e-05	272.986	65.0911	236.356	0	109.483	95.2354	207.895	4.19391	0.622619
681.3/4.6 (67232)	681.344	4.57	3.23731	0.0031	75.0552	17.9919	87.4445	0	64.1738	33.0618	57.0632	4.1716	0.620303
132.1/4.5 (7281)	132.103	4.52	4.04702	0.00037	25.7489	6.21214	27.255	0	16.4353	9.87398	19.5368	4.14494	0.617518
272.3/12.5 (16830)	272.258	12.52	2.93593	0.00658	4.39662	1.06211	4.94533	0	3.88667	2.30973	3.3345	4.13949	0.616947
352.3/13.3 (27126)	352.32	13.33	5.06785	2.3037e-05	20.898	5.04916	23.7918	2.40076	9.94706	6.83253	15.8488	4.13891	0.616886
642.4/6.1 (64013)	642.382	6.12	8.14807	7.1805e-09	111.413	27.2525	123.68	24.4641	26.5394	25.6754	84.1602	4.08816	0.611528
198.2/10.1 (11069)	198.184	10.11	3.17127	0.00366	8.95018	2.18956	7.75266	0	8.61559	3.22384	6.76062	4.08766	0.611475
689.2/8.3 (67791)	689.186	8.27	4.11341	0.00031	32.2452	7.9163	29.1575	6.48939	25.606	6.80234	24.3289	4.07327	0.609943
216.1/5.0 (12261)	216.062	5.05	3.85576	0.00062	119.79	29.418	122.853	6.30731	88.0275	41.7815	90.3717	4.07199	0.609807
434.3/11.9 (38661)	434.27	11.94	3.64213	0.00109	24.2858	5.98029	17.3667	2.02843	19.6335	8.28334	18.3055	4.06097	0.60863
281.2/14.2 (17743)	281.247	14.22	3.62048	0.00115	104.381	25.7257	79.3296	0	74.8599	43.8328	78.6557	4.05748	0.608256
274.1/3.4 (17000)	274.093	3.39	2.92641	0.00673	11.4876	2.83346	9.03942	0	12.0725	4.34013	8.65419	4.05429	0.607915
148.1/3.8 (8141)	148.075	3.79	3.9287	0.00051	24.6621	6.08935	24.6773	0	16.7181	9.23683	18.5728	4.05004	0.607459
353.1/13.2 (27174)	353.078	13.2	4.98939	2.855e-05	66.2705	16.4164	79.6172	10.7287	36.5786	18.5849	49.8541	4.03685	0.606043
239.2/12.9 (14022)	239.161	12.9	3.56486	0.00133	12.792	3.19692	16.3285	0	9.95087	4.92839	9.59506	4.00134	0.602206
595.3/13.2 (59457)	595.345	13.25	3.06043	0.00483	14.5098	3.62732	14.7683	0	12.544	6.96995	10.8824	4.00013	0.602074
362.2/6.6 (28612)	362.206	6.6	3.18354	0.00355	11.3077	2.83678	11.6801	0	10.0546	4.69139	8.47093	3.98611	0.600549
519.1/3.6 (50422)	519.132	3.61	2.91323	0.00695	32.2511	8.10729	26.9837	0	32.2829	13.7451	24.1438	3.97804	0.599669
527.2/13.0 (51482)	527.246	12.95	4.06531	0.00035	30.8719	7.80633	37.8446	4.40043	20.2644	10.9394	23.0656	3.95473	0.597117
499.2/3.8 (47722)	499.238	3.76	3.69876	0.00094	233.905	59.3	233.444	0	158.651	97.912	174.605	3.94444	0.595985
278.2/12.8 (17342)	278.171	12.76	3.81559	0.00069	17.439	4.4255	16.0893	2.30275	12.4294	6.38751	13.0135	3.94056	0.595558
300.2/3.4 (19481)	300.189	3.42	3.5812	0.00128	24.3515	6.20141	21.2607	0	14.8589	11.7574	18.1501	3.92677	0.594035
194.1/5.0 (10808)	194.081	5.03	3.38944	0.0021	270.315	69.6917	333.029	37.5628	235.032	93.8359	200.623	3.87872	0.588689
597.3/13.5 (59651)	597.317	13.46	5.52945	6.5387e-06	37.2561	9.72962	42.8475	3.54687	14.9861	11.3465	27.5265	3.82914	0.583101
185.1/4.5 (10315)	185.128	4.51	4.89782	3.6673e-05	121.713	32.0028	160.623	38.9501	71.3674	30.3597	89.7106	3.80321	0.58015
708.4/13.1 (69216)	708.381	13.12	3.06121	0.00483	24.0095	6.32229	18.5111	0	19.6081	11.8597	17.6872	3.7976	0.579509
601.4/13.3 (60119)	601.375	13.26	5.30391	1.2089e-05	81.0425	21.3753	88.4462	15.4743	34.5872	25.2528	59.6672	3.7914	0.5788
263.2/14.2 (16069)	263.237	14.22	3.65316	0.00106	118.239	31.3226	92.0052	7.09517	78.7367	50.1284	86.916	3.77486	0.576901
501.8/13.3 (48069)	501.775	13.26	3.38771	0.00211	19.2145	5.11155	14.5868	0	14.3731	8.37965	14.1029	3.75903	0.575076
107.0/2.6 (5909)	107.049	2.57	3.15973	0.00377	114.452	30.4643	113.999	0	20.5767	77.8607	83.9879	3.75693	0.574833
209.1/2.8 (11758)	209.091	2.79	4.93059	3.353e-05	127.756	34.1432	129.314	0	39.1458	50.6595	93.6123	3.74175	0.573075
127.0/3.4 (6884)	127.039	3.37	3.89653	0.00055	90.1821	24.1366	85.2003	0	42.2008	42.6801	66.0455	3.73632	0.572444
195.0/1.0 (10860)	194.967	1.02	2.81416	0.00885	16.6037	4.44428	23.132	0	15.1113	8.56293	12.1594	3.73598	0.572404
677.3/13.3 (66923)	677.328	13.27	3.36868	0.00221	23.7648	6.36318	24.5506	3.82473	18.9995	9.53754	17.4016	3.73473	0.572259
193.1/3.8 (10738)	193.096	3.77	6.74859	2.504e-07	57.9511	15.5714	49.8912	22.1726	16.8805	15.2919	42.3797	3.72163	0.570733
384.1/1.1 (31514)	384.116	1.13	4.52193	0.0001	151.841	40.8572	182.135	30.0174	88.2318	46.894	110.984	3.71638	0.57012
377.1/4.4 (30604)	377.144	4.39	2.91737	0.00688	76.3954	20.6076	82.3881	0	66.7335	37.9989	55.7878	3.70715	0.56904
386.7/4.0 (31938)	386.734	4.01	2.80845	0.00897	47.2274	12.9467	37.6241	3.19268	36.4886	27.9563	34.2807	3.64783	0.562035
369.2/1.0 (29556)	369.248	1	5.58087	5.6856e-06	228.005	62.6846	254.988	32.5256	89.7809	67.196	165.32	3.63733	0.560783
490.2/5.8 (46473)	490.176	5.82	5.81704	2.9975e-06	790.765	218.366	710.589	226.774	272.056	236.21	572.399	3.62129	0.558863
543.3/1.1 (53444)	543.266	1.12	4.76026	5.3413e-05	253.687	70.3073	263.107	0	78.1256	103.188	183.38	3.60827	0.557298
727.4/13.3 (70454)	727.425	13.26	2.93843	0.00654	20.1555	5.60074	17.8247	0	18.3189	9.06438	14.5547	3.59872	0.556148
595.3/13.2 (59417)	595.265	13.2	4.64645	7.2885e-05	34.1417	9.53177	41.1691	5.50093	15.9358	12.0768	24.61	3.58189	0.554112
187.1/4.6 (10440)	187.107	4.61	3.05517	0.0049	33.365	9.33691	21.9013	0	32.6315	10.9374	24.0281	3.57346	0.553089
675.3/4.0 (66731)	675.283	4	2.91653	0.0069	271.938	77.8368	368.466	0	207.423	147.837	194.101	3.4937	0.543285
621.3/4.3 (62207)	621.289	4.3	2.9586	0.00622	147.956	42.4147	145.403	0	85.2603	91.1926	105.541	3.48832	0.542617
322.2/5.4 (21904)	322.175	5.41	3.53158	0.00145	66.5055	19.1549	61.6931	0	36.3241	32.5235	47.3506	3.47198	0.540577
425.3/13.3 (37358)	425.27	13.25	4.22868	0.00023	55.5114	16.0386	52.5781	8.9816	32.9867	18.2557	39.4728	3.46111	0.539216
568.3/13.2 (56549)	568.347	13.21	4.59746	8.3308e-05	131.19	37.9508	111.03	27.7242	69.0118	41.5045	93.2391	3.45684	0.53868
496.2/3.8 (47294)	496.173	3.76	6.18835	1.1041e-06	968.597	280.567	844.327	366.516	307.357	266.907	688.03	3.45228	0.538107
388.2/6.0 (32198)	388.22	6	3.99542	0.00043	45.852	13.3436	50.4978	0	21.052	20.1648	32.5084	3.43625	0.536085
376.2/3.7 (30494)	376.172	3.72	8.48021	3.2052e-09	155.143	45.1958	140.046	44.3011	34.7547	31.6139	109.947	3.43268	0.535634
260.2/3.6 (15730)	260.196	3.6	3.07395	0.00467	60.5402	17.6558	54.7746	1.94928	35.4497	34.8417	42.8845	3.42892	0.535157
573.3/13.2 (57062)	573.302	13.21	2.77719	0.00967	24.6732	7.21182	32.0216	3.09121	22.4067	12.1592	17.4614	3.42122	0.534181
410.2/3.8 (35150)	410.176	3.83	5.76098	3.4883e-06	10574.9	3096	8455.44	3919.83	4026.38	2894.81	7478.91	3.41567	0.533476
160.0/3.8 (8804)	160.042	3.79	6.36399	6.9117e-07	1073.47	314.834	956.605	342.519	293.986	301.271	758.634	3.40963	0.532707
381.0/6.3 (31126)	381.041	6.3	3.46331	0.00173	47.9802	14.1082	68.2409	0	36.4847	17.6412	33.8721	3.40089	0.531592
329.2/1.0 (22980)	329.193	1.02	2.96586	0.00611	20.7264	6.14031	16.2955	0	17.9033	9.2258	14.5861	3.37546	0.528333
209.2/12.8 (11806)	209.189	12.8	2.85986	0.00792	6.57446	1.95967	7.84286	0	4.94023	3.63367	4.6148	3.35489	0.525678
329.2/12.9 (23001)	329.229	12.91	3.88175	0.00058	43.2668	12.9011	46.7936	6.95282	29.1414	14.1438	30.3657	3.35372	0.525527
658.3/3.8 (65385)	658.275	3.84	4.74466	5.574e-05	2193.69	655.644	1955.37	819.199	1192.29	598.495	1538.04	3.34585	0.524507
614.4/14.3 (61452)	614.354	14.28	5.63475	4.9117e-06	90.6894	27.1061	90.6875	8.24658	10.4785	32.8504	63.5833	3.34572	0.52449
393.3/13.2 (32900)	393.309	13.16	4.16998	0.00027	46.2119	13.8579	53.8364	9.61762	26.3983	15.881	32.354	3.33469	0.523056
364.1/1.5 (28781)	364.064	1.54	2.81996	0.00872	120.36	36.2116	143.999	0	96.3929	64.3199	84.1481	3.32379	0.521634
377.1/4.8 (30610)	377.146	4.8	3.59249	0.00124	1592.94	482.724	1411.09	420.795	1300.41	407.34	1110.22	3.2999	0.518501
567.2/13.1 (56361)	567.209	13.07	4.03595	0.00038	47.3719	14.395	49.528	7.20358	23.5692	19.1479	32.977	3.29087	0.517311
329.0/12.6 (22883)	329.005	12.6	3.78268	0.00075	28.2062	8.58557	33.2522	6.66027	19.184	9.49145	19.6206	3.2853	0.516575
270.2/1.1 (16645)	270.156	1.08	3.06404	0.00479	62.8183	19.1247	81.5066	0	42.1652	32.8997	43.6936	3.28467	0.516491
163.1/4.2 (9094)	163.107	4.18	5.98743	1.893e-06	46.8729	14.2827	43.3443	16.755	12.9473	13.9377	32.5902	3.28179	0.516111
524.3/13.2 (51134)	524.32	13.19	3.21861	0.00325	58.2999	17.8799	67.5696	11.0622	46.6691	22.7988	40.42	3.26064	0.513303
288.2/3.8 (18402)	288.155	3.83	4.40597	0.00014	17.8274	5.49256	16.5845	0	6.72912	7.14253	12.3349	3.24575	0.511314
581.8/13.3 (58035)	581.839	13.25	4.43989	0.00013	64.2877	19.8112	69.0964	13.5595	26.4634	24.5959	44.4764	3.24501	0.511216
221.2/12.9 (12657)	221.19	12.93	3.64681	0.00107	12.5284	3.86173	16.2552	1.37922	6.35078	5.80347	8.66665	3.24424	0.511113
457.2/1.1 (41908)	457.244	1.11	4.0301	0.00039	377.75	116.973	388.696	0	103.08	180.775	260.778	3.22939	0.50912
331.1/5.8 (23270)	331.14	5.82	6.15316	1.2132e-06	117.447	36.4786	99.3487	40.4915	38.0244	30.8041	80.9687	3.21962	0.507805
317.2/1.1 (21291)	317.182	1.13	4.81037	4.6577e-05	167.486	52.0753	156.191	20.4944	30.7442	68.5482	115.411	3.21622	0.507346
681.3/13.0 (67201)	681.262	13.03	4.03102	0.00039	83.6977	26.0548	100.731	16.0427	51.9166	26.9338	57.6428	3.21237	0.506825
324.2/4.2 (22169)	324.176	4.18	5.7643	3.4572e-06	121.77	37.9301	114.616	47.012	36.9143	36.3424	83.8395	3.21037	0.506555
322.2/6.1 (21911)	322.177	6.12	7.19692	7.8219e-08	100.229	31.2395	105.265	29.8794	21.9193	24.8656	68.9895	3.20841	0.50629
639.4/13.2 (63778)	639.371	13.24	2.76451	0.00997	17.5086	5.4609	18.0397	0	12.7564	10.1203	12.0477	3.20618	0.505989
268.2/13.0 (16507)	268.226	12.99	2.99783	0.00565	8.90032	2.77796	8.93158	1.52482	7.23441	3.98147	6.12236	3.2039	0.505679
484.3/13.3 (45693)	484.349	13.35	2.91728	0.00689	23.8783	7.47076	27.2337	0	10.0177	15.455	16.4076	3.19624	0.504639
435.2/13.3 (38739)	435.197	13.31	2.80047	0.00914	22.432	7.0281	27.229	3.69601	20.7553	9.72296	15.4039	3.19175	0.504029
616.3/13.2 (61635)	616.285	13.15	4.28	0.0002	187.856	58.9978	232.536	43.4105	106.993	58.4441	128.858	3.18411	0.502989
319.1/3.8 (21502)	319.128	3.79	3.06409	0.00479	63.1125	19.8748	65.2578	0	43.2469	31.7514	43.2377	3.17551	0.501813
223.1/13.5 (12720)	223.063	13.46	5.12374	1.9774e-05	35.1278	11.082	39.6852	10.8097	13.3245	11.1013	24.0458	3.16981	0.501034
230.1/5.9 (13316)	230.077	5.94	3.96305	0.00046	14.8022	4.72393	15.3689	4.44253	10.1002	4.02931	10.0783	3.13346	0.496023
310.2/13.2 (20543)	310.235	13.24	4.921	3.4421e-05	56.9313	18.1796	57.1948	15.2965	23.8186	17.889	38.7517	3.13161	0.495767
387.2/3.8 (31995)	387.173	3.81	3.7376	0.00085	88.9604	28.4319	95.5139	33.9503	62.0908	27.7675	60.5285	3.12889	0.495391
208.1/6.0 (11710)	208.096	5.98	3.81745	0.00068	31.0176	9.91623	27.8671	3.50482	19.0579	11.1449	21.1014	3.12796	0.495262
471.8/13.3 (43931)	471.773	13.25	3.90257	0.00055	93.8419	30.0232	120.462	23.2321	59.8447	30.4318	63.8187	3.12565	0.49494
312.2/12.7 (20737)	312.193	12.71	3.56715	0.00132	26.6463	8.55084	31.67	7.58457	18.7594	9.28458	18.0955	3.11623	0.493629
698.3/2.9 (68400)	698.309	2.9	3.47039	0.0017	89.3852	28.7108	109.826	0	53.8487	39.1937	60.6743	3.11329	0.493219
306.2/3.8 (20108)	306.163	3.78	2.8697	0.00773	19.1714	6.20507	22.8511	0	15.0035	9.488	12.9663	3.08963	0.489906
395.2/3.5 (33077)	395.155	3.52	3.99645	0.00042	104.754	33.9544	86.0429	28.6586	66.459	31.6444	70.7995	3.08513	0.489274
324.3/13.4 (22214)	324.274	13.36	5.9526	2.0792e-06	58.3137	19.0591	67.0308	19.81	19.6246	15.1497	39.2546	3.05962	0.485667
790.4/13.4 (73986)	790.386	13.39	3.76472	0.00079	34.0568	11.1318	37.0526	2.47145	16.9688	14.5561	22.925	3.05941	0.485638
556.3/1.1 (55098)	556.266	1.11	3.0355	0.00514	127.052	41.7461	144.315	0	63.1566	73.2821	85.3062	3.04345	0.483366
329.2/13.2 (23002)	329.23	13.18	5.35037	1.065e-05	79.8314	26.3746	89.8192	21.957	31.9065	21.7542	53.4568	3.02683	0.480988
279.2/7.1 (17497)	279.17	7.1	6.07723	1.4871e-06	168.809	56.0062	165.627	57.7588	75.2859	27.7773	112.803	3.01411	0.47916
348.2/6.2 (26330)	348.237	6.24	3.58164	0.00127	6.33219	2.11132	6.80476	0	3.27854	2.81952	4.22087	2.99916	0.477
506.1/1.2 (48593)	506.118	1.16	3.80401	0.00071	78.9759	26.3731	94.3163	12.6151	43.5415	30.4666	52.6027	2.99456	0.476333
428.9/13.4 (37835)	428.892	13.44	5.32567	1.1392e-05	84.1602	28.2383	86.4109	26.445	31.3323	24.0791	55.9219	2.98036	0.474269
660.3/3.8 (65608)	660.308	3.84	5.71695	3.9302e-06	1675.87	563.421	1312.69	706.396	607.47	431.689	1112.45	2.97445	0.473406
478.1/3.8 (44710)	478.136	3.82	3.13954	0.00397	85.8532	29.0865	97.8086	10.2207	56.3726	40.1545	56.7666	2.95165	0.470064
484.2/8.7 (45610)	484.156	8.74	6.01641	1.7511e-06	327.268	111.586	343.243	115.325	67.2593	97.5988	215.682	2.93289	0.467295
721.4/13.2 (70063)	721.354	13.24	3.3127	0.00256	35.1302	12.0179	47.7519	7.51498	23.8503	14.2055	23.1123	2.92316	0.465853
524.2/3.6 (51081)	524.231	3.63	3.505	0.00156	158.077	54.2121	179.568	33.0584	99.0341	61.8232	103.865	2.9159	0.464773
297.1/1.6 (19193)	297.057	1.56	3.56885	0.00132	107.463	36.9562	124.643	15.1888	63.7657	42.6156	70.5069	2.90785	0.463572
548.8/13.3 (54169)	548.835	13.28	3.27486	0.00282	41.2074	14.172	50.8172	13.868	31.2362	14.5198	27.0354	2.90767	0.463545
287.1/12.0 (18312)	287.15	12.04	4.47148	0.00012	28.3262	9.7856	31.2512	10.8856	16.1593	6.86959	18.5406	2.89468	0.461601
526.8/13.3 (51430)	526.822	13.29	4.97631	2.959e-05	70.3645	24.3323	67.9035	17.4349	27.2368	21.4002	46.0322	2.89182	0.461171
297.1/1.1 (19192)	297.057	1.13	3.74146	0.00084	101.796	35.3417	135.55	31.5358	63.7086	34.044	66.4547	2.88035	0.459445
325.1/12.0 (22265)	325.105	12.04	3.80941	0.0007	38.08	13.2554	40.5188	10.2344	26.1472	10.0542	24.8246	2.87279	0.458303
166.1/6.0 (9237)	166.086	5.98	4.13331	0.00029	35.2174	12.2627	29.8723	5.86997	16.8093	12.6099	22.9548	2.87192	0.458173
528.4/13.4 (51682)	528.374	13.36	3.86989	0.00059	54.8357	19.1072	62.4366	11.1922	21.7429	23.7211	35.7285	2.8699	0.457866
114.0/3.8 (6109)	114.036	3.76	4.33564	0.00017	54.8894	19.1449	52.0763	27.0796	26.561	17.8127	35.7445	2.86705	0.457435
352.1/3.8 (27007)	352.132	3.76	4.21083	0.00024	378.787	132.352	334.481	17.5488	120.556	156.191	246.435	2.86197	0.456665
337.1/3.8 (24292)	337.138	3.76	4.25315	0.00021	437.415	153.274	387.092	205.329	217.904	142.732	284.141	2.8538	0.455424
316.2/2.9 (21165)	316.187	2.92	3.7479	0.00082	146.383	51.5032	132.55	11.6418	39.5486	70.9004	94.8799	2.84221	0.453657
337.1/13.5 (24213)	337.076	13.46	4.81146	4.6439e-05	62.6529	22.0862	70.1313	17.7005	22.6125	20.5537	40.5667	2.83674	0.45282
609.2/13.2 (60892)	609.239	13.24	2.90259	0.00714	51.6964	18.2376	60.7661	12.0945	41.3916	22.0606	33.4588	2.8346	0.452492
307.2/12.9 (20239)	307.248	12.91	3.1746	0.00363	21.404	7.55728	22.8083	3.63135	9.76358	11.3871	13.8467	2.83224	0.452129
537.8/13.3 (52786)	537.813	13.26	5.21578	1.5377e-05	134.84	47.9068	146.642	37.7827	44.1458	40.8738	86.9333	2.81463	0.449422
553.2/5.5 (54720)	553.229	5.54	2.90624	0.00707	531.29	189.001	416.598	75.8706	422.627	225.612	342.289	2.81104	0.448867
203.1/1.0 (11458)	203.15	1	7.18094	8.1498e-08	522.582	186.77	530.755	125.392	53.3644	134.72	335.812	2.79799	0.446847
658.3/13.7 (65412)	658.333	13.69	3.16776	0.00369	13.8793	5.01298	15.7501	0	5.78354	7.46433	8.86634	2.76868	0.442272
663.9/14.3 (65913)	663.866	14.26	3.84579	0.00063	27.904	10.0809	35.7613	6.71866	12.9128	11.0789	17.8232	2.76802	0.44217
516.3/12.8 (50049)	516.267	12.78	2.79965	0.00916	140.136	50.6603	136.866	24.1148	116.495	59.8369	89.4755	2.76619	0.441882
656.4/13.2 (65191)	656.399	13.22	4.13526	0.00029	230.298	83.3811	268.801	62.6766	130.122	66.0314	146.917	2.76199	0.441223
337.1/13.2 (24235)	337.104	13.18	4.11707	0.00031	374.937	135.941	471.499	127.406	223.621	98.5854	238.996	2.75809	0.440608
572.4/13.4 (56986)	572.4	13.37	4.4812	0.00011	93.7425	34.1905	108.008	24.8442	36.7959	31.8761	59.5519	2.74177	0.438031
326.2/1.1 (22433)	326.184	1.11	4.63402	7.5399e-05	170.908	62.515	157.268	59.0408	69.422	53.8318	108.393	2.73387	0.436778
485.6/3.8 (45874)	485.619	3.8	4.10094	0.00032	214.825	78.5809	219.51	59.7371	90.765	80.2481	136.244	2.73381	0.436769
228.3/12.9 (13154)	228.268	12.89	4.31097	0.00018	53.7745	19.683	59.6967	20.4004	26.7661	16.2792	34.0915	2.73203	0.436485
365.3/13.4 (29002)	365.288	13.44	3.4243	0.00192	25.6499	9.39211	30.7953	5.4975	14.9193	10.4776	16.2578	2.73101	0.436323
579.4/13.3 (57797)	579.361	13.26	5.44216	8.2924e-06	153.865	56.5878	163.99	44.7626	45.9298	44.4324	97.2772	2.71905	0.434417
285.2/13.1 (18140)	285.204	13.13	5.4842	7.3954e-06	197.49	72.9284	210.827	64.6475	72.1164	49.6959	124.562	2.708	0.432649
657.2/10.4 (65257)	657.238	10.4	3.86292	0.00061	183.752	68.3998	197.468	67.1067	114.505	51.1892	115.352	2.68644	0.429178
358.2/14.3 (28038)	358.2	14.3	3.71924	0.00089	36.0528	13.4371	39.1697	13.6075	16.132	14.9005	22.6157	2.68308	0.428634
322.1/6.3 (21884)	322.141	6.28	3.2997	0.00264	17.4122	6.49873	15.3387	2.47591	8.43213	8.24868	10.9134	2.67932	0.428024
617.2/6.8 (61739)	617.245	6.82	2.82918	0.00853	317.997	120.157	361.291	0	191.194	168.841	197.84	2.64651	0.422673
409.2/12.5 (34982)	409.178	12.53	3.47433	0.00169	55.9289	21.1515	58.9125	19.8117	32.9902	21.1752	34.7775	2.64421	0.422296
176.1/3.8 (9790)	176.07	3.77	3.23753	0.0031	121.148	45.9438	113.743	51.8867	84.13	43.9082	75.2039	2.63687	0.421088
627.3/13.3 (62743)	627.258	13.32	4.18975	0.00025	86.9355	32.9752	93.3345	21.6169	44.404	25.9673	53.9603	2.63639	0.42101
481.2/6.1 (45157)	481.212	6.12	3.28307	0.00276	639.563	242.861	657.601	0	313.631	299.05	396.702	2.63346	0.420526
704.5/13.4 (68916)	704.478	13.39	3.14988	0.00386	72.8988	27.6972	84.3415	24.5792	43.2703	32.6706	45.2015	2.63199	0.420284
162.1/3.8 (8989)	162.075	3.76	4.09209	0.00033	449.551	170.935	445.976	216.951	217.419	148.253	278.615	2.62994	0.419947
616.4/13.4 (61695)	616.427	13.39	4.21726	0.00023	122.196	46.7548	143.082	40.2457	43.6616	45.3863	75.4413	2.61355	0.417231
347.2/1.0 (26168)	347.231	1.04	2.88621	0.00743	413.154	158.464	403.551	54.6542	128.485	249.154	254.69	2.60724	0.416181
307.2/13.2 (20238)	307.247	13.18	5.27185	1.3194e-05	48.0396	18.4561	51.3573	13.8255	16.2276	13.1304	29.5835	2.60291	0.415459
773.3/3.8 (73079)	773.336	3.76	3.86289	0.00061	99.5038	38.3467	84.8598	44.1395	47.5861	36.1242	61.157	2.59484	0.414111
515.8/13.3 (49986)	515.797	13.28	3.13311	0.00403	113.221	43.6839	126.657	33.5562	83.2841	39.6241	69.5367	2.59182	0.413604
120.1/6.0 (6567)	120.081	5.96	2.91271	0.00696	45.634	17.7064	50.2268	14.6521	33.3405	19.1368	27.9276	2.57726	0.411158
540.3/6.3 (53086)	540.303	6.25	5.13776	1.903e-05	743.38	288.691	800.804	342.547	248.948	210.451	454.689	2.575	0.410777
307.2/13.2 (20228)	307.187	13.25	5.24814	1.4076e-05	108.901	42.3048	118.78	38.1546	38.1345	28.9575	66.5964	2.5742	0.410643
359.2/13.4 (28209)	359.24	13.44	3.54858	0.00139	42.9973	16.8419	44.3734	13.0704	23.0419	16.3337	26.1553	2.55299	0.407049
660.5/13.4 (65651)	660.452	13.39	4.07418	0.00034	118.653	46.8394	137.285	31.6879	38.9296	46.1962	71.8133	2.53318	0.403666
242.3/13.0 (14212)	242.284	12.98	3.53394	0.00144	30.3326	11.9942	32.2868	7.49212	13.992	12.6173	18.3385	2.52895	0.40294
294.2/12.9 (19013)	294.182	12.91	3.71884	0.00089	52.9005	20.9357	65.9049	15.4934	23.9371	20.5532	31.9649	2.52681	0.402573
744.4/13.2 (71460)	744.449	13.25	3.56857	0.00132	271.614	107.664	304.361	75.1883	173.95	80.7056	163.95	2.5228	0.401882
263.2/13.1 (16064)	263.221	13.13	4.8482	4.2002e-05	140.494	55.704	153.877	45.2975	51.9562	40.2234	84.7897	2.52215	0.40177
263.1/5.7 (15969)	263.082	5.66	3.05122	0.00495	158.082	62.9497	156.431	0	16.6904	91.9917	95.1324	2.51125	0.399889
612.4/13.2 (61255)	612.371	13.23	2.79743	0.00921	147.155	58.6039	166.273	47.4304	124.253	51.5966	88.5514	2.51102	0.399849
635.3/13.2 (63417)	635.257	13.21	5.98663	1.8971e-06	251.055	100.324	252.578	91.4756	76.2823	57.129	150.732	2.50246	0.398367
322.1/4.5 (21879)	322.138	4.46	3.45732	0.00176	48.7335	19.501	46.8053	17.747	25.935	19.0133	29.2325	2.49903	0.397771
477.4/13.2 (44667)	477.365	13.18	3.03382	0.00517	97.8617	39.1916	116.108	28.2899	57.5186	44.4431	58.6701	2.497	0.397419
503.3/14.3 (48290)	503.305	14.34	2.99455	0.00569	17.3702	7.00214	21.2811	6.42435	9.13623	8.50542	10.3681	2.4807	0.394574
330.7/3.8 (23214)	330.658	3.79	4.46698	0.00012	155.876	62.8944	128.557	73.556	47.6543	53.9732	92.9811	2.47837	0.394166
430.9/13.4 (38186)	430.889	13.44	5.31208	1.1822e-05	185.004	74.8369	200.571	79.2315	54.6792	50.9666	110.167	2.47209	0.393065
344.3/13.4 (25701)	344.315	13.41	4.04898	0.00037	51.0001	20.6688	61.3017	16.0659	25.2332	15.5004	30.3313	2.46749	0.392256
709.4/13.4 (69288)	709.433	13.4	2.98433	0.00584	26.5856	10.7825	30.147	7.8456	11.5413	13.9298	15.803	2.46562	0.391926
348.2/12.1 (26308)	348.203	12.09	4.39911	0.00014	70.7563	28.9091	72.3249	27.5312	37.3746	15.4719	41.8471	2.44754	0.38873
788.5/13.3 (73861)	788.475	13.26	3.02445	0.00529	222.347	90.8999	244.431	68.5821	166.574	74.5738	131.447	2.44606	0.388468
127.1/12.8 (6900)	127.076	12.78	3.09545	0.00443	55.0076	22.605	59.9446	13.7976	24.666	26.8903	32.4026	2.43342	0.386218
482.8/13.3 (45422)	482.794	13.28	4.65835	7.0555e-05	78.6084	32.4378	86.5844	28.7812	30.5606	22.2003	46.1706	2.42336	0.384418
210.2/12.5 (11852)	210.184	12.53	3.13555	0.00401	18.8795	7.79612	16.1844	7.92473	12.2333	7.09509	11.0834	2.42166	0.384113
661.4/13.2 (65724)	661.354	13.23	4.53768	9.8057e-05	87.412	36.1307	96.4876	31.0055	25.2756	29.5115	51.2813	2.41933	0.383695
701.0/13.7 (68639)	701.004	13.66	4.0169	0.0004	122.285	50.5699	141.653	54.3462	57.752	38.4344	71.7153	2.41814	0.383482
392.2/12.1 (32752)	392.229	12.14	3.94698	0.00048	104.778	43.4099	99.2381	39.9278	57.3141	28.6045	61.3681	2.41369	0.382681
294.2/12.1 (19018)	294.204	12.11	3.19857	0.00342	36.1689	15.0066	37.4956	13.4644	23.9092	12.5469	21.1624	2.41021	0.382054
372.3/13.5 (30006)	372.347	13.52	3.31291	0.00255	21.6313	9.007	23.3761	7.58123	10.562	9.13526	12.6243	2.40161	0.380503
530.3/13.4 (51908)	530.251	13.45	3.67419	0.001	77.8282	32.5724	83.9179	22.4594	24.4131	33.162	45.2558	2.38939	0.378287
297.1/13.5 (19198)	297.081	13.46	4.282	0.0002	38.4115	16.0992	39.5571	16.3941	12.5219	13.2951	22.3123	2.38593	0.377657
699.0/13.7 (68456)	699.004	13.65	3.15315	0.00383	80.861	33.9529	93.7815	29.7052	52.7017	28.9999	46.9082	2.38157	0.376863
324.2/3.8 (22168)	324.176	3.76	3.6058	0.0012	1616.96	680.873	1534.17	844.272	790.531	586.894	936.083	2.37483	0.375632
551.2/13.1 (54447)	551.235	13.09	3.8149	0.00069	170.708	72.1872	206.821	58.6995	88.5536	52.4004	98.5212	2.3648	0.373795
441.2/12.2 (39630)	441.21	12.18	3.76393	0.00079	82.3499	35.0882	87.3175	30.8799	45.4146	23.7826	47.2617	2.34694	0.370502
157.0/1.0 (8570)	157.01	1.05	3.98955	0.00043	131.877	56.3913	151.371	50.1587	54.4574	44.3999	75.4861	2.33861	0.368958
219.1/3.8 (12496)	219.096	3.77	2.77737	0.00967	20.1789	8.65694	23.1914	7.9079	13.6667	8.77969	11.522	2.33095	0.367533
577.4/13.4 (57563)	577.354	13.37	2.90347	0.00712	27.4011	11.7666	33.3525	10.12	15.7328	12.5194	15.6346	2.32873	0.367119
455.0/9.2 (41553)	455.04	9.2	2.78359	0.00952	114.424	49.2435	141.818	15.2079	68.1188	54.5897	65.1807	2.32364	0.366169
471.0/9.1 (43800)	471.019	9.14	4.3767	0.00015	347.938	149.992	395.678	146.76	100.186	118.433	197.945	2.3197	0.365432
548.3/14.3 (54120)	548.318	14.32	2.7919	0.00934	99.7415	43.0515	126.949	0	57.3568	48.1723	56.69	2.3168	0.364888
667.2/12.9 (66140)	667.229	12.91	3.74192	0.00084	141.099	61.0118	142.51	37.6231	54.0562	53.5853	80.0871	2.31265	0.36411
336.2/6.2 (24130)	336.192	6.23	4.44885	0.00012	56.5504	24.5846	57.6634	24.7348	21.9104	16.2272	31.9657	2.30023	0.361772
374.3/13.0 (30297)	374.325	13	3.4255	0.00191	190.851	83.0726	215.373	76.7108	111.063	61.6235	107.779	2.29741	0.361238
295.1/4.0 (19063)	295.13	3.98	2.79508	0.00926	1870.65	819.637	2061.45	0	712.154	1021.87	1051.01	2.28229	0.358371
537.2/13.1 (52683)	537.224	13.07	5.84241	2.7989e-06	211.139	92.7881	219.014	90.3905	58.4724	47.4525	118.351	2.2755	0.357077
337.2/1.1 (24319)	337.16	1.12	4.2764	0.0002	52.7687	23.2455	54.3529	26.5326	15.1738	18.1185	29.5232	2.27006	0.356038
454.1/7.4 (41427)	454.109	7.38	2.80325	0.00908	652.415	287.613	752.834	350.597	399.886	292.242	364.802	2.26838	0.355715
160.0/4.2 (8802)	160.042	4.18	3.27063	0.00285	58.2992	25.7119	58.3854	24.1368	28.6465	23.3954	32.5873	2.2674	0.355529
315.1/3.5 (21003)	315.095	3.48	3.58864	0.00125	71.5346	31.7506	75.9175	20.9622	30.8968	26.498	39.784	2.25301	0.352764
529.1/3.3 (51735)	529.128	3.28	3.17509	0.00363	282.381	125.373	209.594	169.347	166.294	102.499	157.008	2.25233	0.352631
327.1/12.8 (22627)	327.132	12.8	3.17131	0.00366	39.3664	17.5365	47.5845	17.8251	20.9929	15.5448	21.8299	2.24483	0.351183
353.2/12.1 (27264)	353.157	12.09	3.42877	0.0019	135.269	60.5133	149.451	60.9577	90.5787	30.1788	74.7556	2.23536	0.349347
169.1/4.6 (9391)	169.076	4.61	4.54848	9.521e-05	98.63	44.2956	97.199	43.882	7.04712	35.1955	54.3344	2.22663	0.347648
149.1/13.2 (8232)	149.059	13.18	3.73804	0.00084	54.8454	24.6349	67.3477	22.2368	29.2925	15.2602	30.2104	2.22632	0.347588
371.3/13.1 (29854)	371.326	13.15	4.50483	0.00011	114.083	51.2703	121.832	45.2396	37.7787	33.8216	62.8131	2.22514	0.347357
390.2/3.6 (32444)	390.189	3.61	3.1386	0.00398	82.2494	36.9923	82.283	38.3778	46.1942	31.3098	45.257	2.22342	0.347021
637.2/13.1 (63576)	637.213	13.14	4.47828	0.00012	542.295	244.354	585.861	190.128	187.915	157.845	297.942	2.21931	0.346217
206.1/6.0 (11618)	206.081	6.04	4.78482	4.9946e-05	34.7212	15.6527	32.2138	15.5461	10.3172	9.87416	19.0684	2.21822	0.346004
258.3/13.0 (15554)	258.279	13	3.6889	0.00096	865.128	393.287	993.737	479.419	402.549	281.925	471.841	2.19974	0.342371
273.8/3.8 (16935)	273.786	3.77	3.17199	0.00365	134.166	61.9592	142.687	72.8457	63.7547	54.2645	72.207	2.1654	0.335537
295.2/13.7 (19105)	295.194	13.71	2.89378	0.00729	39.8557	18.5466	34.8497	13.5815	23.0547	16.299	21.3091	2.14895	0.332227
423.2/1.1 (36977)	423.197	1.12	2.7825	0.00955	423.834	197.292	485.994	261.825	281.419	163.666	226.542	2.14826	0.332087
397.2/12.1 (33363)	397.183	12.14	4.01315	0.00041	159.747	74.3639	156.177	76.1913	81.7197	36.3484	85.3829	2.14818	0.33207
400.4/14.0 (33853)	400.378	14	3.54486	0.0014	25.9874	12.1023	22.3434	13.881	14.7965	6.90993	13.8851	2.14731	0.331894
239.2/12.9 (14027)	239.199	12.92	3.58736	0.00126	24.0715	11.277	26.8797	9.20776	8.65841	9.06667	12.7944	2.13456	0.329307
793.4/13.3 (74138)	793.433	13.26	3.79126	0.00073	103.76	48.7	121.143	41.9996	47.5448	30.9201	55.0599	2.13059	0.328501
665.4/13.4 (66041)	665.408	13.4	3.47836	0.00167	41.6944	19.6592	46.9807	15.8865	15.0274	16.2366	22.0351	2.12085	0.326511
144.1/3.8 (7838)	144.065	3.78	2.76854	0.00987	84.6323	40.0524	90.2623	45.4858	51.5135	35.0063	44.5799	2.11304	0.324907
376.2/7.6 (30515)	376.187	7.64	3.15122	0.00385	25.1157	11.8887	22.5395	8.70967	8.54856	11.2322	13.227	2.11257	0.324811
665.3/13.5 (66004)	665.269	13.54	3.20836	0.00333	30.1918	14.3063	30.8588	12.0766	9.64854	13.3785	15.8854	2.11038	0.32436
296.2/12.7 (19178)	296.219	12.69	2.8598	0.00792	128.508	61.3564	165.881	53.6472	91.6518	38.7691	67.1516	2.09445	0.32107
432.3/5.5 (38402)	432.28	5.47	3.25064	0.00299	92.0654	44.0488	84.304	50.1998	46.1024	32.7765	48.0166	2.09008	0.320162
513.3/13.3 (49659)	513.322	13.26	3.66427	0.00103	246.356	118.241	288.552	107.704	116.725	73.0199	128.115	2.08351	0.318795
384.1/2.8 (31511)	384.113	2.85	3.62136	0.00115	575.967	276.53	588.652	336.304	233.481	196.207	299.437	2.08284	0.318655
398.2/1.1 (33463)	398.154	1.14	3.19139	0.00348	192.555	92.4549	220.58	124.326	80.7571	77.9005	100.1	2.08269	0.318625
351.2/13.3 (26911)	351.215	13.34	4.57672	8.8156e-05	86.9909	41.7991	89.4201	37.569	17.6996	27.1044	45.1918	2.08117	0.318307
649.2/13.4 (64576)	649.241	13.36	4.87094	3.9469e-05	259.775	125.197	275.972	100.179	67.9479	69.9001	134.579	2.07494	0.317005
278.2/12.9 (17345)	278.209	12.91	3.86237	0.00061	189.593	91.4008	200.077	79.359	66.0942	62.8741	98.1922	2.0743	0.316872
436.3/12.2 (38915)	436.254	12.2	3.43744	0.00185	101.022	48.7344	108.428	47.3679	51.6756	31.187	52.2876	2.07291	0.31658
356.4/13.8 (27782)	356.352	13.79	3.17834	0.0036	32.7061	15.7971	35.6857	20.4756	12.7052	13.6038	16.909	2.07038	0.316051
749.4/13.2 (71767)	749.406	13.23	3.73766	0.00085	106.017	52.3637	124.85	47.4693	52.0282	27.1046	53.653	2.02462	0.306344
507.2/12.3 (48736)	507.172	12.32	3.12374	0.00413	237.759	117.602	258.892	110.079	153.866	59.8361	120.157	2.02172	0.305722
577.2/13.1 (57499)	577.215	13.06	4.93134	3.3461e-05	500.745	248.546	510.833	232.511	133.558	126.229	252.199	2.0147	0.30421
368.2/1.1 (29359)	368.151	1.12	4.47593	0.00012	171.545	85.1955	165.386	99.2078	47.0076	48.9773	86.3499	2.01355	0.303962
388.3/13.4 (32230)	388.342	13.4	3.13346	0.00403	38.3187	19.1283	42.0158	12.3327	17.1068	14.6206	19.1904	2.00325	0.301735
283.0/1.1 (17847)	283.042	1.05	3.08341	0.00457	72.9528	36.5917	77.983	20.0376	27.9874	30.2194	36.3611	1.9937	0.299659
402.4/13.4 (34163)	402.358	13.44	5.24209	1.4311e-05	1463.63	738.048	1553.62	729.785	327.416	355.106	725.586	1.98311	0.297348
288.3/13.2 (18449)	288.253	13.23	5.54454	6.2758e-06	174.83	88.8166	195.871	87.8827	37.0281	39.6756	86.0129	1.96843	0.294121
768.4/6.3 (72831)	768.393	6.27	3.00213	0.00559	220.802	113.392	210.451	124.625	80.0837	93.4061	107.41	1.94724	0.28942
557.4/13.3 (55296)	557.35	13.28	3.74964	0.00082	191.328	98.3171	191.465	83.9373	65.2681	61.0167	93.0113	1.94603	0.28915
469.3/13.3 (43601)	469.294	13.26	3.12607	0.0041	175.279	90.1663	197.182	78.8629	88.3127	58.469	85.1132	1.94396	0.288687
258.2/12.4 (15542)	258.206	12.39	4.27208	0.0002	127.005	66.0887	128.875	54.4236	36.0057	35.704	60.9166	1.92174	0.283695
238.0/1.1 (13923)	238.037	1.08	4.55304	9.4034e-05	114.135	59.6291	100.178	65.8631	29.0603	30.4342	54.5064	1.91409	0.281963
244.2/10.1 (14389)	244.19	10.13	3.65913	0.00104	113.809	59.6284	94.2183	55.4913	51.685	29.4151	54.1811	1.90865	0.280725
705.4/13.2 (68986)	705.38	13.24	3.06589	0.00477	90.7975	48.0037	111.443	46.0873	46.4625	29.2379	42.7937	1.89147	0.276799
229.1/4.4 (13184)	229.1	4.42	4.06344	0.00035	409.815	217.178	398.247	238.03	48.9411	137.348	192.637	1.887	0.275772
304.2/12.0 (19911)	304.177	12.03	3.66879	0.00101	58.0174	30.9964	57.2597	30.4088	26.8451	13.7905	27.0211	1.87175	0.272248
226.2/10.1 (12915)	226.18	10.13	3.55173	0.00138	422.747	227.495	361.764	218.482	193.46	108.095	195.252	1.85827	0.269109
284.1/6.5 (18007)	284.139	6.46	3.37795	0.00216	176.396	95.1298	170.496	123.847	25.8141	69.5575	81.2658	1.85426	0.268171
651.2/12.9 (64736)	651.25	12.91	4.08556	0.00033	430.801	232.351	483.776	220.465	114.862	124.63	198.451	1.8541	0.268133
325.1/6.8 (22273)	325.121	6.76	2.85379	0.00804	104.96	56.9379	107.135	59.0717	26.4349	47.0953	48.022	1.84341	0.265622
195.1/1.1 (10870)	195.076	1.12	4.13432	0.00029	187.913	101.947	186.958	93.2329	21.7627	60.1998	85.9665	1.84325	0.265584
428.4/13.6 (37791)	428.373	13.6	2.87912	0.00756	1324.16	723.817	1548.61	850.307	534.566	518.826	600.342	1.82941	0.262311
244.2/13.4 (14395)	244.227	13.35	4.79534	4.8531e-05	91.6911	50.133	102.917	50.3045	23.156	21.1649	41.5581	1.82896	0.262204
314.1/7.4 (20897)	314.128	7.44	3.52563	0.00147	62.2413	34.302	58.9088	31.8155	20.0661	19.8202	27.9394	1.81451	0.25876
116.1/13.7 (6287)	116.053	13.66	4.13486	0.00029	27.6106	15.3725	28.1244	17.0474	4.09756	8.39929	12.2382	1.79611	0.254333
350.1/6.0 (26619)	350.149	6.03	2.84368	0.00824	41.2449	23.0272	39.132	22.4724	6.93023	18.5142	18.2177	1.79114	0.253129
601.2/12.8 (60069)	601.24	12.84	2.8275	0.00857	54.9327	30.7858	56.1213	26.9685	15.1533	23.4822	24.1469	1.78435	0.251481
441.2/5.7 (39636)	441.221	5.73	3.20689	0.00335	250.369	140.559	242.329	161.313	34.2496	99.3591	109.809	1.78123	0.250721
293.1/3.5 (18899)	293.113	3.46	3.64154	0.00109	545.877	307.065	551.772	300.564	151.981	169.391	238.812	1.77773	0.249865
309.1/12.0 (20403)	309.131	12.03	2.98214	0.00587	357.055	202.426	408.07	204.788	206.645	81.4389	154.628	1.76387	0.246468
237.1/1.1 (13854)	237.087	1.12	6.71041	2.7677e-07	287.995	163.323	295.792	171.878	24.5762	52.9421	124.672	1.76335	0.246338
200.2/12.3 (11209)	200.237	12.29	2.78487	0.00949	71.4534	41.2987	70.339	37.7798	30.3378	25.8063	30.1548	1.73016	0.238087
366.1/14.1 (29068)	366.14	14.1	3.67496	0.001	92.7583	53.6947	97.8513	51.8075	23.1481	27.9685	39.0636	1.72751	0.237421
284.3/13.5 (18040)	284.331	13.49	4.2682	0.0002	172.028	101.38	183.29	112.188	30.0852	45.3259	70.6484	1.69687	0.229648
221.1/1.1 (12627)	221.092	1.12	6.40782	6.152e-07	357.45	214.267	364.307	223.169	37.1932	62.0525	143.183	1.66825	0.222261
403.2/1.1 (34277)	403.228	1.11	3.70617	0.00092	1236.51	745.073	1244.31	641.37	285.739	349.885	491.436	1.65958	0.219999
535.2/13.4 (52453)	535.204	13.43	2.84632	0.00819	204.019	124.149	247.052	111.134	91.2577	60.1149	79.8703	1.64334	0.215728
333.1/6.3 (23572)	333.121	6.28	3.02098	0.00533	29.9879	18.6471	27.8561	18.153	6.17473	10.4426	11.3408	1.60818	0.206336
300.2/4.9 (19467)	300.155	4.86	2.79149	0.00934	88.6188	55.518	72.7149	55.8035	46.8703	19.0111	33.1009	1.59622	0.203092
203.1/1.2 (11400)	203.08	1.18	3.33656	0.0024	92.5166	58.9284	86.5235	55.619	19.4922	27.2365	33.5883	1.56998	0.195895
200.2/13.7 (11206)	200.201	13.66	2.90062	0.00717	79.6394	50.7642	80.7045	59.2427	13.7483	28.2568	28.8752	1.56881	0.19557
272.2/12.1 (16825)	272.222	12.14	2.93362	0.00662	44.3636	28.5632	40.3897	29.5629	16.2415	12.2614	15.8004	1.55317	0.19122
212.1/1.1 (11964)	212.102	1.12	7.54222	3.2442e-08	293.159	188.968	308.431	183.615	39.5178	32.535	104.191	1.55137	0.190715
351.2/1.1 (26857)	351.174	1.12	5.57226	5.8203e-06	381.459	246.501	384.522	232.061	63.2306	59.787	134.958	1.54749	0.189629
553.2/13.7 (54711)	553.218	13.66	2.92224	0.0068	487.818	318.281	517.107	347.021	72.7285	166.046	169.537	1.53266	0.185447
457.8/14.4 (41992)	457.763	14.41	4.05595	0.00036	135.252	91.3325	137.936	96.4201	8.80052	31.6736	43.9198	1.48088	0.170519
485.2/12.3 (45770)	485.193	12.3	3.47018	0.0017	480.862	332.707	500.687	322.798	104.924	108.042	148.155	1.4453	0.159959
365.1/14.1 (28930)	365.137	14.11	3.00773	0.00551	453.784	315.168	473.901	349.62	90.445	124.344	138.616	1.43982	0.158307
254.2/12.1 (15257)	254.212	12.12	3.39943	0.00205	91.1153	64.2944	86.0196	63.0826	25.8456	16.788	26.8208	1.41716	0.151418
276.1/1.1 (17181)	276.143	1.12	2.9507	0.00634	867.599	618.471	894.135	665.013	75.4382	246.164	249.128	1.40281	0.147
335.1/14.2 (23928)	335.125	14.24	3.38195	0.00214	1098.52	801.878	1153.8	863.458	201.34	227.247	296.639	1.36993	0.136698
512.8/14.4 (49578)	512.813	14.38	3.82747	0.00067	160.004	132.974	162.419	136.14	12.8958	19.323	27.0305	1.20328	0.0803655
119.0/1.1 (6487)	119.049	1.14	-2.92843	0.0067	500.426	611.946	495.657	644.169	37.5401	110.577	-111.52	0.817761	-0.0873734
182.1/1.2 (10138)	182.082	1.16	-2.84326	0.00825	5444.96	6667.96	5499.29	6773.19	256.887	1267.07	-1222.99	0.816587	-0.0879978
147.0/1.1 (8039)	147.043	1.14	-2.77714	0.00967	769.373	943.498	777.471	942.471	39.7993	184.498	-174.125	0.815448	-0.0886039
136.1/1.1 (7424)	136.075	1.14	-3.09297	0.00446	3071.7	3805.52	3097.26	3943.66	125.639	700.117	-733.823	0.807169	-0.0930356
160.0/1.0 (8775)	160.034	1	-2.88564	0.00744	165.132	262.887	181.905	277.497	67.6923	91.0435	-97.7546	0.62815	-0.201937
396.2/6.4 (33231)	396.152	6.44	-2.81788	0.00877	266.424	429.397	303.976	438.766	108.017	157.592	-162.973	0.620461	-0.207285
102.1/1.1 (5786)	102.055	1.14	-3.33099	0.00244	116.783	190.041	108.291	185.109	34.5483	61.5519	-73.2575	0.614516	-0.211467
116.1/1.0 (6334)	116.071	1.02	-4.15642	0.00028	7471.02	12469.2	7328.6	12982.5	654.003	3547.28	-4998.2	0.599157	-0.222459
118.1/1.1 (6449)	118.086	1.07	-3.50397	0.00156	2246.74	4021.97	2156.38	3404.13	227.228	1497.74	-1775.22	0.558618	-0.252885
414.2/4.3 (35739)	414.176	4.25	-2.89014	0.00736	133.453	245.538	129.822	231.54	66.747	107.162	-112.086	0.54351	-0.264792
286.1/1.1 (18219)	286.149	1.05	-3.87572	0.00059	815.192	1528.2	1041.77	1631.2	459.739	462.563	-713.011	0.533432	-0.272921
386.2/1.1 (31845)	386.166	1.12	-3.67191	0.00101	236.633	466.179	253.226	486.449	98.9715	174.786	-229.546	0.507602	-0.294477
243.1/6.8 (14242)	243.087	6.85	-3.39693	0.00206	79.1228	156.296	90.8976	137.949	27.1906	65.2417	-77.1728	0.506238	-0.295645
355.2/1.1 (27599)	355.16	1.08	-3.12503	0.00411	124.855	261.521	131.229	261.679	157.988	82.9734	-136.666	0.477419	-0.3211
229.1/1.0 (13207)	229.118	1.03	-3.89529	0.00056	131.2	277.568	203.105	275.383	125.921	78.1715	-146.368	0.472677	-0.325436
328.2/5.1 (22805)	328.186	5.08	-2.79314	0.00931	62.5457	135.212	58.511	111.183	40.5503	72.8824	-72.6659	0.462577	-0.334816
762.4/3.7 (72491)	762.362	3.73	-3.81143	0.0007	55.2526	119.801	64.3613	130.488	24.7023	47.808	-64.5487	0.461202	-0.336109
612.2/3.7 (61202)	612.211	3.73	-6.06989	1.5167e-06	108.851	242.636	108.462	234.17	20.7612	64.1275	-133.786	0.448617	-0.348125
620.4/8.2 (62125)	620.383	8.22	-3.21781	0.00325	17.8202	40.9441	22.3119	40.6514	11.6203	20.0366	-23.1238	0.435234	-0.361277
383.2/3.5 (31414)	383.198	3.48	-4.65787	7.0647e-05	107.931	250.817	99.6356	223.84	47.972	85.9036	-142.886	0.430316	-0.366212
399.2/3.3 (33648)	399.235	3.34	-3.77286	0.00077	329.525	772.846	322.721	747.889	52.905	347.357	-443.321	0.426379	-0.370204
357.2/3.7 (27872)	357.177	3.71	-3.07716	0.00464	124.569	301.936	113.316	275.86	68.7224	165.572	-177.367	0.412568	-0.384504
269.1/1.1 (16553)	269.111	1.13	-3.21034	0.00332	98.1224	239.94	110.632	232.481	42.1356	128.459	-141.818	0.408946	-0.388334
130.0/1.0 (7001)	130.049	1.02	-3.42924	0.00189	595.849	1485.8	880.622	1577.23	585.031	676.104	-889.948	0.40103	-0.396823
655.3/1.2 (65069)	655.313	1.15	-3.62356	0.00114	66.2148	168.736	66.7575	175.441	43.0974	79.482	-102.521	0.392417	-0.406253
567.3/15.3 (56430)	567.328	15.26	-5.95304	2.0766e-06	21.8468	55.6943	21.0575	53.3515	12.6784	14.8605	-33.8475	0.392263	-0.406423
480.2/5.1 (45015)	480.234	5.12	-2.97397	0.00599	31.0297	79.5031	30.3781	96.7867	24.2769	45.9066	-48.4734	0.390296	-0.408606
366.1/11.1 (29069)	366.14	11.09	-3.44798	0.0018	132.608	340.547	123.753	272.852	76.5596	172.435	-207.939	0.389396	-0.409609
158.1/1.1 (8689)	158.117	1.15	-3.51328	0.00152	81.5519	209.948	88.3764	214.404	38.0421	105.836	-128.396	0.388438	-0.410678
615.3/4.2 (61520)	615.296	4.17	-3.24567	0.00303	21.4739	55.4096	17.3932	64.7279	16.7691	29.1845	-33.9357	0.387549	-0.411674
550.1/9.1 (54297)	550.06	9.12	-3.02674	0.00526	89.7067	236.388	82.8176	278.834	44.7276	141.117	-146.681	0.379489	-0.420801
629.3/1.1 (62929)	629.286	1.13	-5.2899	1.256e-05	103.094	275.903	109.76	291.9	41.7252	93.3602	-172.809	0.37366	-0.427523
283.1/1.1 (17896)	283.129	1.15	-3.31069	0.00257	83.2665	223.106	90.3968	248.665	30.9904	123.902	-139.84	0.373215	-0.428041
371.2/4.8 (29813)	371.192	4.8	-2.92605	0.00674	172.947	464.326	139.362	511.07	93.0605	289.826	-291.38	0.372468	-0.428911
118.1/1.2 (6410)	118.064	1.15	-3.3444	0.00236	13.3996	36.0746	13.866	38.8947	12.4101	18.5428	-22.675	0.371441	-0.43011
343.2/1.1 (25455)	343.171	1.08	-3.81756	0.00068	86.9497	243.778	0	254.839	104.56	102.527	-156.828	0.356676	-0.447726
394.2/6.7 (32985)	394.197	6.7	-3.06086	0.00483	502.183	1409.73	527.552	1097.83	86.0949	878.876	-907.546	0.356226	-0.448274
330.2/4.8 (23137)	330.166	4.8	-4.40562	0.00014	58.3899	166.215	57.3153	145.442	28.3338	70.4416	-107.825	0.351292	-0.454332
233.1/1.1 (13590)	233.113	1.09	-2.95892	0.00622	98.5576	286.549	96.1236	198.579	31.4553	187.634	-187.992	0.343946	-0.463509
277.1/8.4 (17222)	277.103	8.38	-4.03638	0.00038	7.00127	20.7191	9.37825	19.5773	6.18547	9.3042	-13.7178	0.337914	-0.471194
655.4/15.2 (65097)	655.38	15.22	-3.52866	0.00146	15.6348	48.4765	9.12338	48.3996	22.87	23.5541	-32.8417	0.322523	-0.491439
371.2/4.1 (29814)	371.194	4.13	-3.70224	0.00093	143.304	465.138	141.796	427.349	39.0133	256.986	-321.834	0.30809	-0.511322
387.1/1.5 (31974)	387.149	1.51	-4.05882	0.00036	54.3659	180.779	60.1073	196.42	37.3671	89.4265	-126.413	0.300732	-0.521821
424.1/1.0 (37130)	424.124	1.04	-2.81768	0.00877	26.8401	90.2928	19.8443	87.1818	25.5488	64.8981	-63.4527	0.297256	-0.526869
267.1/1.1 (16387)	267.133	1.14	-2.764	0.00998	23.5553	80.5042	22.2809	96.9893	12.0671	60.7123	-56.9489	0.292597	-0.53373
699.8/4.1 (68535)	699.846	4.08	-2.94789	0.00639	42.9442	150.009	42.2093	172.732	23.0296	106.875	-107.065	0.286278	-0.543213
471.3/7.6 (43894)	471.281	7.63	-3.09805	0.0044	64.8174	228.015	64.8326	240.662	16.3639	156.101	-163.197	0.284268	-0.546272
464.3/3.9 (42880)	464.259	3.9	-4.04149	0.00038	13.9565	49.2595	0	48.3346	23.6462	21.1976	-35.3031	0.283325	-0.547714
723.1/9.2 (70171)	723.123	9.16	-3.44148	0.00183	115.292	409.488	87.0588	479.573	69.1132	250.087	-294.196	0.281552	-0.550442
334.2/8.4 (23761)	334.155	8.38	-4.7574	5.3832e-05	8.24131	29.5066	8.29673	25.0629	7.10004	12.4925	-21.2653	0.279304	-0.553924
366.1/8.6 (29060)	366.139	8.57	-4.98927	2.8559e-05	41.7455	149.465	25.8098	152.111	40.7626	58.7086	-107.719	0.2793	-0.55393
137.0/1.1 (7506)	137.046	1.14	-7.52631	3.3773e-08	303.391	1095.61	305.7	1007.93	29.4759	312.052	-792.224	0.276914	-0.557655
433.6/9.2 (38551)	433.609	9.16	-3.26189	0.00291	168.176	612.125	179.032	695.658	95.9073	399.625	-443.949	0.274741	-0.561076
400.2/3.3 (33825)	400.236	3.3	-3.79465	0.00073	34.4018	125.311	43.2125	127.977	26.6043	69.1308	-90.9088	0.274532	-0.561407
357.2/4.1 (27871)	357.176	4.13	-4.06875	0.00035	64.263	238.081	71.1005	275.84	41.8008	124.087	-173.818	0.269921	-0.568763
669.2/9.2 (66312)	669.204	9.16	-3.06322	0.0048	61.7701	231.401	41.5544	255.516	54.4031	160.821	-169.631	0.266939	-0.573588
508.2/6.3 (48942)	508.24	6.27	-2.83602	0.00839	267.7	1009.03	329.614	1356.08	166.546	769.135	-741.331	0.265304	-0.576256
599.3/6.0 (59870)	599.3	6.03	-3.83619	0.00065	20.9376	79.9138	14.6387	88.1972	21.4108	43.6031	-58.9762	0.262002	-0.581695
352.1/9.2 (27012)	352.132	9.15	-3.25026	0.003	23.7705	92.3948	27.5428	97.4711	21.039	61.2757	-68.6243	0.257271	-0.589609
494.1/9.2 (47033)	494.142	9.16	-3.74352	0.00083	69.2064	270.975	56.1851	309.942	39.9609	158.061	-201.769	0.255398	-0.592783
593.3/5.8 (59248)	593.328	5.83	-3.30899	0.00258	28.6985	112.438	14.7414	101.918	33.7816	72.0565	-83.7398	0.255238	-0.593055
530.1/9.2 (51876)	530.116	9.18	-3.37378	0.00219	95.8304	377.609	82.0837	395.185	57.2793	245.382	-281.779	0.253782	-0.595539
391.2/4.5 (32549)	391.161	4.53	-3.48225	0.00165	106.07	418.681	111.517	310.396	106.185	258.014	-312.611	0.253344	-0.596289
662.3/1.2 (65783)	662.325	1.15	-5.71561	3.9444e-06	50.0246	199.831	55.7948	198.954	50.4678	70.9944	-149.806	0.250335	-0.601479
292.1/8.6 (18779)	292.102	8.57	-4.68113	6.6301e-05	15.4955	61.9348	12.8045	71.4754	17.2943	27.3569	-46.4393	0.25019	-0.601729
438.2/1.1 (39160)	438.158	1.14	-4.17733	0.00026	30.8807	123.653	0	142.155	39.7824	60.9682	-92.7722	0.249737	-0.602518
247.1/1.1 (14663)	247.128	1.14	-4.67173	6.8024e-05	405.094	1628.31	352.256	1496.85	121.055	773.825	-1223.21	0.248783	-0.60418
454.3/14.2 (41493)	454.293	14.25	-2.7976	0.00921	63.9664	268.696	65.653	224.865	28.2206	216.601	-204.73	0.238062	-0.623309
261.1/1.2 (15838)	261.145	1.17	-3.60944	0.00118	323.846	1362.2	306.53	1513.39	119.424	851.01	-1038.35	0.237739	-0.6239
428.2/7.0 (37719)	428.181	7.03	-5.93155	2.2005e-06	156.722	666.902	154.349	637.807	26.799	254.878	-510.18	0.235	-0.628933
645.3/3.9 (64260)	645.307	3.88	-3.16455	0.00372	16.9577	72.2357	0	67.1506	37.7571	46.054	-55.278	0.234755	-0.629385
274.1/8.5 (16984)	274.091	8.51	-4.99106	2.842e-05	49.3428	210.264	23.3016	234.988	51.8358	89.9662	-160.921	0.234671	-0.62954
291.2/8.5 (18721)	291.17	8.45	-4.4989	0.00011	4.19893	18.0278	0	18.2421	5.58305	8.41826	-13.8289	0.232914	-0.632804
316.1/4.1 (21106)	316.128	4.11	-2.97279	0.00601	17.1875	74.7671	13.834	61.5236	16.4606	56.5726	-57.5796	0.22988	-0.638498
121.1/1.4 (6633)	121.064	1.41	-3.47018	0.0017	34.1223	149.465	33.2703	143.534	22.851	97.6486	-115.343	0.228297	-0.641501
580.3/4.6 (57849)	580.256	4.59	-3.13731	0.00399	21.5859	97.7496	24.1981	102.134	18.559	71.1365	-76.1637	0.220828	-0.655945
558.3/4.6 (55374)	558.276	4.61	-3.04873	0.00498	296.799	1348.65	395.243	1765.88	235.996	1013.71	-1051.86	0.22007	-0.657439
455.2/5.7 (41626)	455.249	5.72	-3.105	0.00433	12.2609	56.0465	0	60.959	19.2743	40.0664	-43.7855	0.218764	-0.660024
417.2/5.6 (36227)	417.176	5.64	-3.00305	0.00558	42.8161	196.532	31.7079	180.813	31.6812	150.69	-153.716	0.217858	-0.661827
251.2/8.2 (14981)	251.16	8.23	-4.27117	0.0002	2.23215	10.4438	0	10.3834	2.89915	5.40738	-8.2117	0.213728	-0.670138
513.1/9.2 (49593)	513.141	9.16	-2.87828	0.00757	86.5747	405.407	84.5181	436.524	59.1306	326.842	-318.832	0.21355	-0.6705
334.1/4.1 (23748)	334.139	4.12	-3.97563	0.00045	54.3942	256.17	45.7592	282.569	53.0741	146.944	-201.776	0.212336	-0.672976
542.2/6.5 (53280)	542.224	6.54	-3.54015	0.00142	95.4599	453.373	109.354	528.129	60.3212	297.821	-357.913	0.210555	-0.676634
302.1/5.0 (19704)	302.149	4.95	-2.92712	0.00672	134.564	640.006	106.291	524.465	66.1805	511.109	-505.442	0.210254	-0.677256
530.2/6.2 (51889)	530.219	6.24	-4.36224	0.00016	11.4426	54.778	8.02533	51.2608	9.74615	28.852	-43.3354	0.20889	-0.680082
356.0/9.1 (27672)	355.986	9.13	-2.76553	0.00995	9.75867	46.7254	0	41.4789	14.374	38.6428	-36.9667	0.208852	-0.680162
510.2/9.2 (49209)	510.169	9.18	-2.9903	0.00575	28.6463	138.447	25.7659	174.875	24.2991	107.961	-109.8	0.206912	-0.684214
362.1/9.2 (28535)	362.071	9.19	-2.9572	0.00624	36.4868	178.362	7.5336	228.584	46.0628	139.472	-141.875	0.204566	-0.689166
795.4/6.5 (74225)	795.423	6.46	-2.79098	0.00936	8.59593	43.2503	5.26221	33.396	9.18111	36.4152	-34.6543	0.198749	-0.701696
580.3/4.3 (57852)	580.258	4.25	-2.8276	0.00857	16.888	85.267	15.9642	103.205	13.564	71.3046	-68.379	0.19806	-0.703202
436.2/4.0 (38873)	436.181	3.97	-3.10803	0.00429	8.91018	46.2105	0	59.9519	13.1916	34.6517	-37.3003	0.192817	-0.714854
342.2/1.1 (25342)	342.213	1.12	-3.28399	0.00275	10.5024	55.004	15.8826	69.1833	10.0841	39.7361	-44.5016	0.190939	-0.719104
531.3/1.1 (52050)	531.285	1.13	-2.82784	0.00856	63.9673	338.299	0	264.749	127.236	276.642	-274.332	0.189085	-0.723343
132.1/7.9 (7268)	132.101	7.95	-2.91207	0.00697	6.41984	34.1714	6.02576	42.9688	1.62075	28.2836	-27.7515	0.187872	-0.726138
417.2/5.9 (36265)	417.233	5.88	-4.3844	0.00015	22.8206	121.585	13.5216	124.328	25.7573	64.8863	-98.7646	0.187692	-0.726554
629.3/3.3 (62930)	629.287	3.27	-5.21161	1.5553e-05	44.0816	235.042	31.9594	262.297	53.1752	103.492	-190.961	0.187547	-0.726889
428.2/6.7 (37718)	428.18	6.71	-2.7912	0.00935	21.1507	115.697	20.126	62.0044	16.5907	100.049	-94.5465	0.182811	-0.737997
664.4/8.4 (65958)	664.411	8.43	-3.74619	0.00083	3.05221	16.7231	3.09853	15.7783	2.58398	10.7139	-13.6709	0.182514	-0.738703
408.2/6.3 (34870)	408.213	6.33	-4.85107	4.1673e-05	34.7466	191.047	37.7613	198.133	10.1556	95.472	-156.3	0.181875	-0.740227
356.2/7.2 (27756)	356.217	7.24	-3.86918	0.0006	54.4762	304.444	59.3408	263.418	28.5402	191.016	-249.968	0.178937	-0.747301
239.1/1.1 (14007)	239.102	1.12	-3.5865	0.00126	21.3168	119.183	25.5402	136.934	12.8617	80.63	-97.8661	0.178858	-0.747492
[truncated: 542 more rows]

## Sheet: Metarhizium live ions p<0.01
Sheet 2: Ion peaks significantly higher (p<0.01) in M. anisopliae samples. Yellow marking indicates destruxins
Peak name	M/z	Ret. Time	t-value	p-value	mean1	mean2	median1	median2	sigma1	sigma2	Delta	Fold Change	Log(Fold Change)
256.1/8.4 (15383)	256.133	8.38	21.0705	1.0288e-18	40.3741	0	37.0717	0	8.99772	0	40.3741	Infinity	Infinity
547.1/8.0 (53933)	547.134	7.99	19.0383	1.4714e-17	264.074	0	234.63	0	65.1333	0	264.074	Infinity	Infinity
549.1/8.0 (54186)	549.133	8.02	17.6126	1.1058e-16	127.874	0	113.606	0	34.0928	0	127.874	Infinity	Infinity
583.4/11.8 (58199)	583.391	11.81	16.7271	4.1523e-16	183.843	0	168.586	0	51.6096	0	183.843	Infinity	Infinity
317.1/1.1 (21239)	317.079	1.07	16.3823	7.0608e-16	518.634	0	529.917	0	148.659	0	518.634	Infinity	Infinity
465.2/14.1 (43020)	465.241	14.14	16.1923	9.4978e-16	2497.38	0	2526.11	0	724.236	0	2497.38	Infinity	Infinity
477.9/4.9 (44692)	477.934	4.91	14.7388	1.0118e-14	85.7744	0	89.2994	0	27.3275	0	85.7744	Infinity	Infinity
644.7/8.5 (64207)	644.66	8.47	13.8784	4.4809e-14	161.151	0	153.857	0	54.5253	0	161.151	Infinity	Infinity
472.3/14.1 (44037)	472.342	14.12	13.6886	6.2804e-14	76.6915	0	87.3941	0	26.3083	0	76.6915	Infinity	Infinity
789.9/7.6 (73962)	789.867	7.6	13.5013	8.7937e-14	133.469	0	138.438	0	46.4202	0	133.469	Infinity	Infinity
549.1/8.5 (54185)	549.132	8.53	13.0862	1.8781e-13	106.676	0	92.7117	0	38.2786	0	106.676	Infinity	Infinity
564.3/11.5 (56084)	564.348	11.54	13.0445	2.0286e-13	516.854	0	479.488	0	186.056	0	516.854	Infinity	Infinity
547.1/8.5 (53932)	547.133	8.52	12.8635	2.8422e-13	214.144	0	189.356	0	78.172	0	214.144	Infinity	Infinity
233.2/8.3 (13624)	233.153	8.28	12.8367	2.9886e-13	36.4604	0	33.7547	0	13.3375	0	36.4604	Infinity	Infinity
449.3/14.1 (40795)	449.267	14.14	12.07	1.2984e-12	5397.22	0	5000.1	0	2099.74	0	5397.22	Infinity	Infinity
244.2/12.2 (14396)	244.227	12.18	12.0428	1.3697e-12	52.8219	0	47.1492	0	20.5964	0	52.8219	Infinity	Infinity
367.2/15.2 (29283)	367.225	15.16	11.7085	2.6552e-12	125.61	0	129.17	0	50.3765	0	125.61	Infinity	Infinity
465.3/12.3 (43039)	465.262	12.3	11.6197	3.1724e-12	355.207	0	313.515	0	143.546	0	355.207	Infinity	Infinity
712.7/8.1 (69470)	712.667	8.11	11.561	3.5702e-12	25.1575	0	24.482	0	10.2182	0	25.1575	Infinity	Infinity
427.3/12.5 (37619)	427.284	12.49	11.5609	3.5712e-12	88.3017	0	75.4423	0	35.866	0	88.3017	Infinity	Infinity
346.1/1.0 (25907)	346.061	1.04	11.4041	4.9055e-12	447.47	0	489.065	0	184.249	0	447.47	Infinity	Infinity
481.2/12.3 (45181)	481.235	12.32	10.8715	1.4747e-11	109.078	0	100.321	0	47.1142	0	109.078	Infinity	Infinity
511.2/14.1 (49388)	511.236	14.14	10.5218	3.0949e-11	85.6481	0	82.8042	0	38.2237	0	85.6481	Infinity	Infinity
467.3/12.5 (43310)	467.276	12.51	9.88936	1.2297e-10	39.1339	0	33.7275	0	18.5818	0	39.1339	Infinity	Infinity
427.3/14.1 (37621)	427.285	14.14	9.54929	2.6375e-10	23831.4	0	19441.7	0	11718.8	0	23831.4	Infinity	Infinity
369.2/14.1 (29553)	369.243	14.13	9.29426	4.7207e-10	316.004	0	247.148	0	159.655	0	316.004	Infinity	Infinity
409.3/14.1 (35045)	409.274	14.14	9.23828	5.3703e-10	3985.33	0	3202.77	0	2025.71	0	3985.33	Infinity	Infinity
358.2/5.7 (27978)	358.15	5.72	9.23078	5.464e-10	96.3085	0	89.9898	0	48.9926	0	96.3085	Infinity	Infinity
443.3/12.3 (39961)	443.28	12.3	9.20468	5.8035e-10	3153.89	0	2508.45	0	1608.95	0	3153.89	Infinity	Infinity
601.4/10.2 (60128)	601.401	10.17	9.10806	7.2599e-10	245.645	0	276.565	0	126.644	0	245.645	Infinity	Infinity
662.3/8.5 (65767)	662.299	8.47	9.03979	8.5106e-10	14.1299	0	13.3164	0	7.33981	0	14.1299	Infinity	Infinity
301.1/1.1 (19531)	301.062	1.11	8.71242	1.8395e-09	373.957	0	320.713	0	201.552	0	373.957	Infinity	Infinity
331.3/12.1 (23361)	331.26	12.11	8.62379	2.2719e-09	85.4116	0	76.8909	0	46.5075	0	85.4116	Infinity	Infinity
396.2/13.1 (33249)	396.178	13.09	8.41412	3.7589e-09	46.607	0	39.7959	0	26.0104	0	46.607	Infinity	Infinity
623.3/7.2 (62405)	623.282	7.19	8.38213	4.0612e-09	28.0778	0	34.1493	0	15.7294	0	28.0778	Infinity	Infinity
442.1/5.4 (39749)	442.068	5.43	8.28392	5.1537e-09	21.3934	0	19.6901	0	12.1269	0	21.3934	Infinity	Infinity
400.2/11.8 (33767)	400.176	11.83	8.11669	7.7548e-09	259.373	0	274.03	0	150.055	0	259.373	Infinity	Infinity
657.1/7.7 (65218)	657.086	7.74	8.0982	8.1152e-09	14.6772	0	13.4623	0	8.51061	0	14.6772	Infinity	Infinity
578.3/7.7 (57668)	578.328	7.72	8.03942	9.3779e-09	692.118	0	648.557	0	404.259	0	692.118	Infinity	Infinity
634.8/5.3 (63385)	634.777	5.34	7.75029	1.9226e-08	27.0539	0	25.5955	0	16.3914	0	27.0539	Infinity	Infinity
235.1/7.3 (13715)	235.144	7.35	7.69047	2.2334e-08	1104.12	0	908.616	0	674.165	0	1104.12	Infinity	Infinity
582.4/10.3 (58108)	582.358	10.29	7.67334	2.3315e-08	945.862	0	885.032	0	578.826	0	945.862	Infinity	Infinity
271.1/6.6 (16683)	271.06	6.59	7.6198	2.6675e-08	94.1646	0	102.739	0	58.0295	0	94.1646	Infinity	Infinity
273.2/7.9 (16886)	273.16	7.95	7.53391	3.313e-08	14.2609	0	18.2895	0	8.88857	0	14.2609	Infinity	Infinity
304.7/13.9 (19941)	304.654	13.9	7.5177	3.4517e-08	78.0206	0	99.9615	0	48.7336	0	78.0206	Infinity	Infinity
475.3/7.9 (44413)	475.274	7.9	7.5092	3.5268e-08	38.0377	0	39.3482	0	23.7862	0	38.0377	Infinity	Infinity
430.3/14.1 (38123)	430.293	14.15	7.50799	3.5376e-08	135.008	0	118.918	0	84.4383	0	135.008	Infinity	Infinity
425.3/14.1 (37355)	425.269	14.14	7.49346	3.6702e-08	324.002	0	210.868	0	203.034	0	324.002	Infinity	Infinity
418.2/11.8 (36361)	418.187	11.83	7.46486	3.9462e-08	367.041	0	368.439	0	230.886	0	367.041	Infinity	Infinity
440.2/11.8 (39452)	440.169	11.83	7.44994	4.0985e-08	769.209	0	932.088	0	484.837	0	769.209	Infinity	Infinity
580.3/7.7 (57898)	580.342	7.68	7.43986	4.2048e-08	214.052	0	204.362	0	135.101	0	214.052	Infinity	Infinity
259.1/11.8 (15634)	259.132	11.84	7.35411	5.2305e-08	21.1608	0	29.2952	0	13.5116	0	21.1608	Infinity	Infinity
451.3/15.2 (41091)	451.28	15.18	7.2924	6.1234e-08	215.196	0	204.405	0	138.57	0	215.196	Infinity	Infinity
606.3/14.3 (60613)	606.305	14.31	7.23099	7.1667e-08	68.7858	0	78.6196	0	44.6689	0	68.7858	Infinity	Infinity
596.3/6.7 (59550)	596.336	6.68	7.22647	7.2504e-08	145.454	0	166.372	0	94.5156	0	145.454	Infinity	Infinity
274.2/7.7 (17079)	274.2	7.72	7.19812	7.7977e-08	49.627	0	50.1422	0	32.3745	0	49.627	Infinity	Infinity
425.3/12.3 (37357)	425.27	12.29	7.14875	8.8537e-08	195.003	0	154.263	0	128.09	0	195.003	Infinity	Infinity
411.3/15.2 (35356)	411.289	15.16	7.14121	9.0273e-08	202.783	0	193.005	0	133.341	0	202.783	Infinity	Infinity
601.4/9.5 (60127)	601.4	9.49	7.12322	9.4555e-08	37.3503	0	35.1394	0	24.6219	0	37.3503	Infinity	Infinity
560.4/14.6 (55660)	560.37	14.64	7.01461	1.252e-07	21.9321	0	22.7258	0	14.6819	0	21.9321	Infinity	Infinity
467.3/15.2 (43297)	467.254	15.18	6.95094	1.4768e-07	59.7933	0	61.7243	0	40.3937	0	59.7933	Infinity	Infinity
390.0/1.0 (32396)	390.026	1.03	6.8568	1.887e-07	48.0182	0	59.2306	0	32.8843	0	48.0182	Infinity	Infinity
258.2/7.9 (15540)	258.204	7.86	6.78362	2.2845e-07	27.186	0	18.7356	0	18.8186	0	27.186	Infinity	Infinity
573.4/11.5 (57096)	573.361	11.49	6.73115	2.6211e-07	94.6597	0	93.0279	0	66.0359	0	94.6597	Infinity	Infinity
440.2/11.6 (39448)	440.167	11.64	6.69629	2.8722e-07	478.622	0	606.294	0	335.631	0	478.622	Infinity	Infinity
339.1/10.3 (24671)	339.14	10.29	6.68895	2.928e-07	55.7291	0	49.3073	0	39.1226	0	55.7291	Infinity	Infinity
445.3/12.3 (40302)	445.286	12.32	6.66369	3.129e-07	113.049	0	83.592	0	79.663	0	113.049	Infinity	Infinity
459.3/8.0 (42254)	459.28	8.05	6.6581	3.1754e-07	30.8952	0	28.8788	0	21.7894	0	30.8952	Infinity	Infinity
376.2/5.7 (30475)	376.16	5.73	6.60907	3.6128e-07	60.258	0	39.6626	0	42.8133	0	60.258	Infinity	Infinity
587.3/7.8 (58639)	587.339	7.77	6.6057	3.645e-07	25.7694	0	25.4709	0	18.3185	0	25.7694	Infinity	Infinity
368.1/11.8 (29358)	368.15	11.81	6.58871	3.812e-07	29.0968	0	36.2282	0	20.7372	0	29.0968	Infinity	Infinity
550.3/13.7 (54377)	550.326	13.7	6.53621	4.3786e-07	20.7324	0	27.1428	0	14.8946	0	20.7324	Infinity	Infinity
371.2/14.1 (29824)	371.222	14.14	6.53043	4.446e-07	161.362	0	111.325	0	116.028	0	161.362	Infinity	Infinity
461.0/1.4 (42451)	461.034	1.4	6.52314	4.5325e-07	59.8807	0	59.6733	0	43.1057	0	59.8807	Infinity	Infinity
374.2/13.1 (30255)	374.196	13.09	6.52247	4.5405e-07	69.6236	0	48.6476	0	50.1244	0	69.6236	Infinity	Infinity
382.2/11.8 (31287)	382.166	11.83	6.50458	4.7604e-07	98.3447	0	114.019	0	70.9963	0	98.3447	Infinity	Infinity
207.1/4.7 (11681)	207.113	4.66	6.50249	4.7868e-07	166.319	0	142.784	0	120.107	0	166.319	Infinity	Infinity
597.4/8.1 (59674)	597.37	8.1	6.49852	4.8374e-07	446.589	0	523.612	0	322.699	0	446.589	Infinity	Infinity
598.0/5.4 (59710)	598.043	5.39	6.43512	5.7221e-07	237.319	0	240.993	0	173.173	0	237.319	Infinity	Infinity
393.2/8.0 (32892)	393.249	8.02	6.42712	5.8449e-07	17.5254	0	21.3848	0	12.8043	0	17.5254	Infinity	Infinity
755.7/7.4 (72110)	755.682	7.39	6.42178	5.9282e-07	84.6391	0	93.185	0	61.8899	0	84.6391	Infinity	Infinity
452.2/8.2 (41152)	452.166	8.16	6.38754	6.4925e-07	167.055	0	206.744	0	122.809	0	167.055	Infinity	Infinity
421.0/1.3 (36674)	421.006	1.3	6.37047	6.7937e-07	30.3959	0	32.2507	0	22.4051	0	30.3959	Infinity	Infinity
289.2/8.8 (18533)	289.154	8.81	6.34933	7.1867e-07	43.723	0	58.2148	0	32.336	0	43.723	Infinity	Infinity
429.3/15.2 (37964)	429.3	15.17	6.29617	8.2796e-07	122.706	0	111.358	0	91.5153	0	122.706	Infinity	Infinity
345.2/8.2 (25858)	345.237	8.23	6.29318	8.3456e-07	43.6153	0	41.2125	0	32.5441	0	43.6153	Infinity	Infinity
394.2/5.7 (32966)	394.169	5.72	6.21276	1.0344e-06	12.8232	0	12.352	0	9.69206	0	12.8232	Infinity	Infinity
575.3/7.9 (57303)	575.28	7.88	6.20373	1.0597e-06	11.9202	0	11.4374	0	9.0227	0	11.9202	Infinity	Infinity
333.1/5.7 (23547)	333.089	5.72	6.20156	1.0658e-06	80.2982	0	88.5288	0	60.8008	0	80.2982	Infinity	Infinity
347.1/6.4 (26079)	347.106	6.45	6.19205	1.0933e-06	63.2363	0	63.882	0	47.9553	0	63.2363	Infinity	Infinity
529.2/14.1 (51753)	529.211	14.14	6.18106	1.1259e-06	88.9241	0	74.0569	0	67.5555	0	88.9241	Infinity	Infinity
513.1/1.4 (49592)	513.069	1.42	6.17215	1.1531e-06	38.8762	0	41.4344	0	29.5769	0	38.8762	Infinity	Infinity
599.4/8.0 (59910)	599.385	8.04	6.16895	1.163e-06	240.204	0	225.81	0	182.841	0	240.204	Infinity	Infinity
323.0/1.3 (21983)	323.045	1.27	6.1423	1.249e-06	20.4905	0	17.2151	0	15.6648	0	20.4905	Infinity	Infinity
400.2/11.6 (33766)	400.176	11.63	6.1362	1.2696e-06	160.453	0	170.835	0	122.787	0	160.453	Infinity	Infinity
418.2/11.7 (36360)	418.187	11.66	6.12003	1.3258e-06	169.554	0	179.089	0	130.095	0	169.554	Infinity	Infinity
308.2/6.0 (20319)	308.195	5.95	6.10674	1.3739e-06	29.4121	0	28.6781	0	22.6162	0	29.4121	Infinity	Infinity
440.1/7.9 (39428)	440.08	7.93	6.09488	1.4183e-06	20.221	0	18.0675	0	15.579	0	20.221	Infinity	Infinity
396.1/2.8 (33219)	396.136	2.84	6.02835	1.6957e-06	131.289	0	165.186	0	102.266	0	131.289	Infinity	Infinity
457.4/13.3 (41960)	457.398	13.29	6.01321	1.7662e-06	12.6822	0	11.7872	0	9.90359	0	12.6822	Infinity	Infinity
282.7/10.3 (17840)	282.678	10.27	5.99642	1.8478e-06	16.9941	0	17.6996	0	13.3079	0	16.9941	Infinity	Infinity
412.7/4.6 (35514)	412.666	4.65	5.96007	2.0377e-06	35.1895	0	25.2046	0	27.7246	0	35.1895	Infinity	Infinity
438.1/7.9 (39150)	438.081	7.93	5.93717	2.1674e-06	57.3598	0	48.5689	0	45.3662	0	57.3598	Infinity	Infinity
313.6/13.9 (20865)	313.642	13.89	5.87879	2.537e-06	14.2722	0	18.6721	0	11.4001	0	14.2722	Infinity	Infinity
456.1/11.8 (41705)	456.14	11.81	5.87668	2.5515e-06	211.72	0	253.585	0	169.174	0	211.72	Infinity	Infinity
463.1/1.6 (42693)	463.086	1.64	5.87186	2.5849e-06	84.0902	0	86.465	0	67.2472	0	84.0902	Infinity	Infinity
543.2/8.0 (53413)	543.215	8.01	5.84834	2.7544e-06	24.2713	0	28.4277	0	19.4879	0	24.2713	Infinity	Infinity
437.3/14.6 (39088)	437.267	14.64	5.75731	3.5232e-06	51.133	0	39.8024	0	41.7048	0	51.133	Infinity	Infinity
543.2/8.5 (53414)	543.215	8.45	5.75065	3.5873e-06	47.9241	0	39.2831	0	39.1328	0	47.9241	Infinity	Infinity
610.3/14.4 (61066)	610.327	14.44	5.74011	3.6912e-06	15.9568	0	14.8378	0	13.0536	0	15.9568	Infinity	Infinity
422.2/7.7 (36847)	422.175	7.68	5.72255	3.871e-06	39.4054	0	37.9535	0	32.3348	0	39.4054	Infinity	Infinity
221.1/8.8 (12621)	221.091	8.85	5.68264	4.3132e-06	40.8181	0	52.8718	0	33.7293	0	40.8181	Infinity	Infinity
598.4/14.7 (59794)	598.384	14.71	5.59638	5.4511e-06	8.68363	0	12.0983	0	7.28615	0	8.68363	Infinity	Infinity
424.2/12.3 (37156)	424.172	12.33	5.59263	5.5068e-06	158.704	0	112.505	0	133.253	0	158.704	Infinity	Infinity
332.0/1.3 (23387)	331.992	1.27	5.57546	5.7699e-06	46.6899	0	39.2402	0	39.323	0	46.6899	Infinity	Infinity
384.2/12.3 (31542)	384.181	12.34	5.50768	6.9376e-06	168.839	0	162.495	0	143.949	0	168.839	Infinity	Infinity
420.3/14.0 (36637)	420.29	14.04	5.5042	7.0037e-06	68.4016	0	38.7564	0	58.3548	0	68.4016	Infinity	Infinity
585.3/13.1 (58354)	585.273	13.05	5.49465	7.1881e-06	54.7629	0	29.2356	0	46.8006	0	54.7629	Infinity	Infinity
555.3/12.7 (55016)	555.349	12.72	5.49102	7.2594e-06	15.0886	0	14.0976	0	12.9033	0	15.0886	Infinity	Infinity
488.0/1.3 (46183)	487.989	1.27	5.45244	8.0635e-06	14.47	0	17.3191	0	12.4619	0	14.47	Infinity	Infinity
794.3/6.2 (74162)	794.323	6.16	5.44383	8.2548e-06	23.2147	0	23.716	0	20.0246	0	23.2147	Infinity	Infinity
397.3/14.7 (33412)	397.274	14.65	5.41942	8.8224e-06	38.6203	0	35.1748	0	33.4632	0	38.6203	Infinity	Infinity
317.0/1.1 (21230)	317.037	1.11	5.34595	1.0779e-05	92.922	0	87.8764	0	81.6202	0	92.922	Infinity	Infinity
382.2/11.6 (31286)	382.165	11.65	5.3394	1.0973e-05	56.1479	0	54.0105	0	49.3793	0	56.1479	Infinity	Infinity
413.3/13.8 (35652)	413.271	13.79	5.31246	1.181e-05	96.0863	0	76.1719	0	84.9318	0	96.0863	Infinity	Infinity
304.1/13.7 (19873)	304.148	13.68	5.30355	1.21e-05	20.2063	0	21.8574	0	17.8906	0	20.2063	Infinity	Infinity
312.6/13.7 (20753)	312.634	13.68	5.29205	1.2486e-05	13.2225	0	11.994	0	11.7326	0	13.2225	Infinity	Infinity
320.1/11.8 (21632)	320.128	11.82	5.2889	1.2594e-05	7.59032	0	8.72087	0	6.73906	0	7.59032	Infinity	Infinity
797.0/5.3 (74315)	797.049	5.35	5.2774	1.2996e-05	91.9473	0	65.5422	0	81.8132	0	91.9473	Infinity	Infinity
339.0/1.3 (24638)	339.015	1.28	5.25274	1.3901e-05	21.7553	0	24.2096	0	19.4484	0	21.7553	Infinity	Infinity
221.1/5.3 (12652)	221.128	5.33	5.2358	1.4559e-05	19.9037	0	22.9559	0	17.8506	0	19.9037	Infinity	Infinity
339.0/1.1 (24639)	339.018	1.11	5.20921	1.5655e-05	47.208	0	28.3235	0	42.5547	0	47.208	Infinity	Infinity
597.3/5.3 (59652)	597.32	5.3	5.20607	1.579e-05	20.3927	0	23.0469	0	18.3937	0	20.3927	Infinity	Infinity
763.0/7.4 (72533)	763.005	7.43	5.19651	1.6208e-05	8.68796	0	8.12861	0	7.85075	0	8.68796	Infinity	Infinity
356.2/13.1 (27732)	356.186	13.07	5.18102	1.6909e-05	31.2262	0	20.6326	0	28.3014	0	31.2262	Infinity	Infinity
406.2/7.6 (34589)	406.178	7.62	5.17649	1.7119e-05	77.7921	0	82.2417	0	70.5675	0	77.7921	Infinity	Infinity
441.3/15.8 (39697)	441.303	15.82	5.13403	1.9225e-05	362.62	0	260.125	0	331.663	0	362.62	Infinity	Infinity
361.0/1.3 (28381)	361.019	1.28	5.13	1.9438e-05	18.3171	0	19.2765	0	16.7666	0	18.3171	Infinity	Infinity
481.0/1.2 (45117)	481.043	1.2	5.06229	2.339e-05	15.9155	0	10.0175	0	14.7631	0	15.9155	Infinity	Infinity
415.3/14.7 (35983)	415.285	14.65	5.02278	2.6059e-05	35.6631	0	25.2671	0	33.3411	0	35.6631	Infinity	Infinity
501.2/6.9 (47976)	501.204	6.9	5.02262	2.607e-05	27.9881	0	25.0977	0	26.1666	0	27.9881	Infinity	Infinity
399.0/1.3 (33571)	399.024	1.27	5.02179	2.6129e-05	15.114	0	12.4625	0	14.1326	0	15.114	Infinity	Infinity
554.3/8.6 (54892)	554.326	8.58	4.98419	2.8959e-05	47.1958	0	35.2925	0	44.4645	0	47.1958	Infinity	Infinity
250.1/7.3 (14883)	250.144	7.28	4.96458	3.0553e-05	74.8048	0	60.2805	0	70.754	0	74.8048	Infinity	Infinity
613.4/6.5 (61367)	613.363	6.52	4.96173	3.0793e-05	174.942	0	135.864	0	165.563	0	174.942	Infinity	Infinity
199.1/11.6 (11129)	199.112	11.63	4.92715	3.3846e-05	16.4669	0	16.6868	0	15.6935	0	16.4669	Infinity	Infinity
421.2/6.3 (36690)	421.156	6.33	4.9085	3.5618e-05	78.5198	0	43.7435	0	75.1165	0	78.5198	Infinity	Infinity
365.1/6.1 (28914)	365.085	6.15	4.90105	3.635e-05	20.6699	0	32.0193	0	19.8041	0	20.6699	Infinity	Infinity
472.0/1.6 (43947)	472.041	1.56	4.88173	3.8323e-05	30.9924	0	21.5591	0	29.8116	0	30.9924	Infinity	Infinity
455.1/6.2 (41571)	455.141	6.24	4.86911	3.9668e-05	127.558	0	68.4785	0	123.016	0	127.558	Infinity	Infinity
472.3/1.1 (44007)	472.275	1.12	4.86249	4.0392e-05	66.8006	0	96.3806	0	64.5098	0	66.8006	Infinity	Infinity
252.1/5.1 (15057)	252.124	5.15	4.83137	4.3979e-05	418.289	0	612.45	0	406.547	0	418.289	Infinity	Infinity
654.3/5.9 (64990)	654.316	5.91	4.82347	4.4939e-05	226.941	0	297.61	0	220.932	0	226.941	Infinity	Infinity
655.4/4.2 (65092)	655.366	4.16	4.80757	4.6935e-05	91.1992	0	114.268	0	89.0778	0	91.1992	Infinity	Infinity
479.3/15.8 (44919)	479.257	15.81	4.78949	4.9312e-05	14.9866	0	8.52419	0	14.6932	0	14.9866	Infinity	Infinity
597.4/7.7 (59673)	597.37	7.75	4.70977	6.1312e-05	20.8455	0	13.6927	0	20.7834	0	20.8455	Infinity	Infinity
361.0/1.1 (28382)	361.041	1.08	4.70767	6.1666e-05	35.2135	0	27.8305	0	35.1243	0	35.2135	Infinity	Infinity
445.2/1.1 (40238)	445.203	1.14	4.68191	6.6161e-05	95.0408	0	113.478	0	95.3217	0	95.0408	Infinity	Infinity
333.1/8.1 (23575)	333.126	8.11	4.66449	6.9382e-05	9.48282	0	12.14	0	9.54634	0	9.48282	Infinity	Infinity
426.0/14.1 (37400)	425.966	14.11	4.65669	7.0875e-05	58.5479	0	37.1218	0	59.0388	0	58.5479	Infinity	Infinity
580.3/6.3 (57863)	580.271	6.31	4.64627	7.292e-05	17.9062	0	18.5236	0	18.0968	0	17.9062	Infinity	Infinity
488.8/6.0 (46316)	488.757	6.02	4.63564	7.5068e-05	8.96985	0	9.31852	0	9.08615	0	8.96985	Infinity	Infinity
224.1/2.0 (12792)	224.139	1.95	4.62418	7.7453e-05	31.8852	0	21.0051	0	32.3786	0	31.8852	Infinity	Infinity
486.1/8.6 (45909)	486.117	8.57	4.61604	7.919e-05	51.1439	0	16.6129	0	52.027	0	51.1439	Infinity	Infinity
581.0/4.5 (57942)	581.049	4.52	4.60842	8.0854e-05	41.5961	0	48.7038	0	42.3842	0	41.5961	Infinity	Infinity
466.0/1.2 (43092)	466.005	1.25	4.60827	8.0888e-05	22.5793	0	27.562	0	23.0079	0	22.5793	Infinity	Infinity
468.3/13.2 (43463)	468.348	13.16	4.60072	8.257e-05	15.5138	0	15.2275	0	15.8342	0	15.5138	Infinity	Infinity
416.2/5.7 (36049)	416.153	5.73	4.59083	8.4829e-05	65.626	0	55.3967	0	67.1258	0	65.626	Infinity	Infinity
584.4/12.7 (58291)	584.375	12.73	4.56864	9.0119e-05	30.6241	0	19.6565	0	31.4761	0	30.6241	Infinity	Infinity
404.2/8.6 (34354)	404.163	8.64	4.55789	9.2801e-05	47.3449	0	47.6175	0	48.7769	0	47.3449	Infinity	Infinity
485.7/4.1 (45875)	485.694	4.14	4.52834	0.0001	123.974	0	119.005	0	128.557	0	123.974	Infinity	Infinity
601.3/8.5 (60091)	601.315	8.47	4.52923	0.0001	4.77195	0	3.76992	0	4.94739	0	4.77195	Infinity	Infinity
449.2/6.2 (40747)	449.2	6.16	4.49754	0.00011	28.4431	0	22.2238	0	29.6966	0	28.4431	Infinity	Infinity
437.3/14.0 (39094)	437.292	14.04	4.47105	0.00012	121.603	0	76.9341	0	127.714	0	121.603	Infinity	Infinity
445.2/5.6 (40211)	445.17	5.57	4.42779	0.00013	35.8294	0	36.2052	0	37.9976	0	35.8294	Infinity	Infinity
350.1/11.8 (26605)	350.137	11.82	4.4089	0.00014	17.5367	0	13.1268	0	18.6776	0	17.5367	Infinity	Infinity
418.2/8.1 (36351)	418.178	8.06	4.40081	0.00014	19.5951	0	14.16	0	20.9083	0	19.5951	Infinity	Infinity
259.1/11.7 (15636)	259.134	11.66	4.38463	0.00015	15.4698	0	11.4668	0	16.5675	0	15.4698	Infinity	Infinity
395.3/13.8 (33171)	395.26	13.79	4.35232	0.00016	52.9046	0	54.8609	0	57.0791	0	52.9046	Infinity	Infinity
550.3/5.8 (54348)	550.284	5.83	4.3645	0.00016	19.5659	0	12.5008	0	21.0509	0	19.5659	Infinity	Infinity
371.7/4.2 (29869)	371.678	4.23	4.33211	0.00017	178.38	0	198.778	0	193.353	0	178.38	Infinity	Infinity
406.2/7.8 (34590)	406.179	7.83	4.32722	0.00017	17.3759	0	12.5228	0	18.8558	0	17.3759	Infinity	Infinity
412.2/13.1 (35443)	412.152	13.07	4.33838	0.00017	7.13484	0	6.06979	0	7.72255	0	7.13484	Infinity	Infinity
268.1/5.8 (16470)	268.113	5.81	4.31353	0.00018	7.4874	0	6.85989	0	8.15085	0	7.4874	Infinity	Infinity
452.2/8.7 (41159)	452.177	8.67	4.31874	0.00018	75.5393	0	28.7759	0	82.1334	0	75.5393	Infinity	Infinity
227.0/1.5 (12939)	227.014	1.47	4.30349	0.00019	68.6415	0	47.2465	0	74.898	0	68.6415	Infinity	Infinity
232.1/2.9 (13529)	232.095	2.93	4.29219	0.00019	14.7119	0	12.5088	0	16.0952	0	14.7119	Infinity	Infinity
321.1/1.1 (21723)	321.065	1.06	4.23584	0.00022	11.5449	0	7.63675	0	12.7983	0	11.5449	Infinity	Infinity
473.0/1.3 (44080)	473.037	1.28	4.22559	0.00023	7.23161	0	6.72914	0	8.03622	0	7.23161	Infinity	Infinity
550.3/12.3 (54372)	550.315	12.33	4.21094	0.00024	1405	0	1090.58	0	1566.76	0	1405	Infinity	Infinity
472.0/1.3 (43944)	472.022	1.27	4.18054	0.00026	8.43921	0	8.85299	0	9.47924	0	8.43921	Infinity	Infinity
259.1/4.3 (15589)	259.082	4.35	4.14081	0.00029	7.38958	0	6.27655	0	8.37989	0	7.38958	Infinity	Infinity
402.2/12.3 (34093)	402.192	12.33	4.1156	0.00031	76.6327	0	65.9958	0	87.435	0	76.6327	Infinity	Infinity
619.3/3.3 (61964)	619.257	3.34	4.10477	0.00032	94.6892	0	88.2972	0	108.322	0	94.6892	Infinity	Infinity
358.2/13.6 (28042)	358.203	13.55	4.07823	0.00034	16.1773	0	11.9179	0	18.6268	0	16.1773	Infinity	Infinity
455.1/6.6 (41572)	455.142	6.61	4.08321	0.00034	134.407	0	89.0216	0	154.57	0	134.407	Infinity	Infinity
753.4/4.2 (71980)	753.403	4.21	4.05465	0.00036	11.146	0	7.46004	0	12.9083	0	11.146	Infinity	Infinity
523.2/6.6 (50940)	523.204	6.62	4.03857	0.00038	77.1688	0	46.9382	0	89.7259	0	77.1688	Infinity	Infinity
489.1/7.1 (46336)	489.09	7.11	4.0233	0.00039	46.0465	0	36.6492	0	53.7426	0	46.0465	Infinity	Infinity
398.1/7.9 (33454)	398.141	7.93	4.01703	0.0004	78.4657	0	52.1762	0	91.7232	0	78.4657	Infinity	Infinity
574.7/4.1 (57234)	574.713	4.07	3.98531	0.00044	63.4931	0	29.0843	0	74.8116	0	63.4931	Infinity	Infinity
528.3/4.4 (51661)	528.305	4.43	3.97819	0.00045	36.4113	0	7.20213	0	42.9788	0	36.4113	Infinity	Infinity
572.3/12.3 (56941)	572.297	12.34	3.96276	0.00046	102.544	0	50.7108	0	121.511	0	102.544	Infinity	Infinity
438.2/5.6 (39167)	438.169	5.58	3.94731	0.00048	15.2169	0	10.0385	0	18.1021	0	15.2169	Infinity	Infinity
457.2/3.0 (41860)	457.179	3.01	3.94775	0.00048	81.4861	0	0	0	96.9255	0	81.4861	Infinity	Infinity
566.7/3.5 (56328)	566.722	3.53	3.94895	0.00048	65.4714	0	52.8503	0	77.8527	0	65.4714	Infinity	Infinity
594.3/10.2 (59363)	594.347	10.19	3.94977	0.00048	21.0475	0	6.03329	0	25.0227	0	21.0475	Infinity	Infinity
475.2/5.5 (44358)	475.207	5.54	3.94439	0.00049	88.9315	0	0	0	105.872	0	88.9315	Infinity	Infinity
227.1/11.8 (12989)	227.107	11.84	3.92923	0.00051	10.2598	0	4.06007	0	12.2613	0	10.2598	Infinity	Infinity
364.1/4.9 (28801)	364.15	4.92	3.92164	0.00052	44.7939	0	0	0	53.6359	0	44.7939	Infinity	Infinity
406.2/5.2 (34581)	406.161	5.21	3.90628	0.00054	191.429	0	0	0	230.117	0	191.429	Infinity	Infinity
389.2/4.6 (32330)	389.23	4.59	3.90158	0.00055	18.9686	0	0	0	22.8296	0	18.9686	Infinity	Infinity
393.2/7.9 (32845)	393.185	7.95	3.89859	0.00055	25.9312	0	19.6901	0	31.2335	0	25.9312	Infinity	Infinity
500.2/3.2 (47860)	500.244	3.25	3.89799	0.00055	19.232	0	0	0	23.168	0	19.232	Infinity	Infinity
797.0/5.5 (74314)	797.048	5.49	3.88613	0.00057	61.3796	0	0	0	74.167	0	61.3796	Infinity	Infinity
329.2/3.4 (22973)	329.185	3.44	3.88215	0.00058	6.02574	0	4.22752	0	7.28857	0	6.02574	Infinity	Infinity
198.2/10.2 (11075)	198.222	10.23	3.8723	0.00059	12.9239	0	7.63732	0	15.6721	0	12.9239	Infinity	Infinity
178.6/2.2 (9984)	178.612	2.15	3.86183	0.00061	184.383	0	101.71	0	224.198	0	184.383	Infinity	Infinity
422.2/6.4 (36846)	422.173	6.45	3.85984	0.00061	26.7453	0	19.7629	0	32.5373	0	26.7453	Infinity	Infinity
245.1/5.8 (14471)	245.128	5.81	3.85488	0.00062	620.369	0	0	0	755.691	0	620.369	Infinity	Infinity
632.0/1.3 (63146)	632.048	1.32	3.84255	0.00064	6.19052	0	1.67343	0	7.56506	0	6.19052	Infinity	Infinity
219.1/4.9 (12508)	219.112	4.87	3.82814	0.00066	185.414	0	0	0	227.436	0	185.414	Infinity	Infinity
462.2/1.1 (42618)	462.22	1.13	3.83184	0.00066	102.877	0	0	0	126.072	0	102.877	Infinity	Infinity
235.1/1.0 (13709)	235.111	1.03	3.82565	0.00067	19.3438	0	4.14295	0	23.7432	0	19.3438	Infinity	Infinity
636.3/1.1 (63517)	636.293	1.12	3.82474	0.00067	34.847	0	12.9652	0	42.7827	0	34.847	Infinity	Infinity
252.1/5.2 (15056)	252.121	5.24	3.80716	0.0007	254.469	0	0	0	313.861	0	254.469	Infinity	Infinity
412.1/4.4 (35438)	412.147	4.4	3.81146	0.0007	16.4395	0	0	0	20.2535	0	16.4395	Infinity	Infinity
254.1/3.7 (15218)	254.102	3.71	3.80407	0.00071	247.32	0	1.37957	0	305.292	0	247.32	Infinity	Infinity
411.2/1.2 (35315)	411.197	1.17	3.77836	0.00076	47.664	0	0	0	59.2368	0	47.664	Infinity	Infinity
606.4/12.7 (60647)	606.358	12.73	3.74199	0.00084	16.5196	0	9.74163	0	20.7302	0	16.5196	Infinity	Infinity
267.1/7.6 (16375)	267.122	7.62	3.72668	0.00087	12.2061	0	0	0	15.3801	0	12.2061	Infinity	Infinity
368.0/1.2 (29313)	367.969	1.25	3.72261	0.00088	34.994	0	0	0	44.1418	0	34.994	Infinity	Infinity
322.2/5.8 (21897)	322.172	5.78	3.71826	0.00089	3.88568	0	0	0	4.90718	0	3.88568	Infinity	Infinity
437.0/1.2 (38995)	436.976	1.2	3.71457	0.0009	37.8332	0	0	0	47.8264	0	37.8332	Infinity	Infinity
723.9/8.2 (70218)	723.862	8.21	3.69635	0.00094	7.82073	0	5.19217	0	9.93524	0	7.82073	Infinity	Infinity
659.9/4.3 (65585)	659.851	4.25	3.68228	0.00098	15.8268	0	14.1999	0	20.1828	0	15.8268	Infinity	Infinity
423.1/7.1 (36952)	423.13	7.06	3.67333	0.001	12.8585	0	0	0	16.4375	0	12.8585	Infinity	Infinity
672.3/3.5 (66529)	672.315	3.52	3.64115	0.00109	27.3905	0	0.995105	0	35.3236	0	27.3905	Infinity	Infinity
288.0/1.3 (18365)	288.001	1.3	3.63486	0.00111	3.8255	0	0	0	4.94203	0	3.8255	Infinity	Infinity
358.7/5.6 (28078)	358.675	5.57	3.62422	0.00114	7.04705	0	0	0	9.13056	0	7.04705	Infinity	Infinity
489.1/7.4 (46337)	489.093	7.44	3.61518	0.00117	16.0638	0	7.36349	0	20.8652	0	16.0638	Infinity	Infinity
287.1/7.6 (18285)	287.054	7.62	3.60619	0.00119	19.3162	0	0	0	25.1524	0	19.3162	Infinity	Infinity
581.2/10.8 (57953)	581.248	10.84	3.60623	0.00119	7.24197	0	0	0	9.42991	0	7.24197	Infinity	Infinity
494.0/1.3 (47029)	494.037	1.33	3.5989	0.00122	13.1626	0	8.50826	0	17.1742	0	13.1626	Infinity	Infinity
404.7/4.4 (34418)	404.667	4.37	3.59314	0.00124	143.428	0	0	0	187.441	0	143.428	Infinity	Infinity
578.4/11.7 (57677)	578.355	11.69	3.57312	0.0013	167.933	0	85.0767	0	220.696	0	167.933	Infinity	Infinity
391.2/4.3 (32592)	391.211	4.26	3.56401	0.00133	33.2383	0	0	0	43.793	0	33.2383	Infinity	Infinity
300.1/2.8 (19449)	300.12	2.8	3.55528	0.00136	119.96	0	0	0	158.44	0	119.96	Infinity	Infinity
224.1/1.2 (12794)	224.139	1.2	3.5533	0.00137	14.839	0	0	0	19.61	0	14.839	Infinity	Infinity
580.3/6.2 (57861)	580.27	6.19	3.54442	0.0014	23.0794	0	0	0	30.5763	0	23.0794	Infinity	Infinity
602.4/11.4 (60253)	602.387	11.41	3.54586	0.0014	29.361	0	17.8268	0	38.8825	0	29.361	Infinity	Infinity
455.2/3.5 (41593)	455.209	3.48	3.54278	0.00141	4.71179	0	0	0	6.24518	0	4.71179	Infinity	Infinity
307.1/7.9 (20157)	307.079	7.87	3.51911	0.0015	6.63128	0	4.98685	0	8.84849	0	6.63128	Infinity	Infinity
389.7/3.4 (32371)	389.689	3.35	3.50614	0.00155	41.9456	0	0	0	56.1774	0	41.9456	Infinity	Infinity
595.4/7.6 (59472)	595.379	7.62	3.5013	0.00157	10.1896	0	0	0	13.6657	0	10.1896	Infinity	Infinity
753.4/4.4 (71979)	753.402	4.4	3.50238	0.00157	10.2323	0	0	0	13.7187	0	10.2323	Infinity	Infinity
424.2/12.2 (37159)	424.174	12.23	3.49149	0.00161	8.38296	0	0	0	11.2743	0	8.38296	Infinity	Infinity
614.3/5.0 (61423)	614.304	4.96	3.47945	0.00166	18.9931	0	3.37793	0	25.6324	0	18.9931	Infinity	Infinity
597.5/5.3 (59681)	597.534	5.28	3.47344	0.00169	40.5708	0	0	0	54.8476	0	40.5708	Infinity	Infinity
482.0/1.3 (45247)	481.979	1.31	3.45831	0.00176	9.67145	0	5.94446	0	13.132	0	9.67145	Infinity	Infinity
473.2/5.8 (44115)	473.226	5.83	3.45157	0.00179	23.8735	0	6.16369	0	32.4791	0	23.8735	Infinity	Infinity
574.7/4.3 (57236)	574.718	4.32	3.43357	0.00187	137.569	0	0	0	188.139	0	137.569	Infinity	Infinity
151.0/1.5 (8333)	151	1.49	3.4301	0.00189	3.97704	0	0	0	5.4445	0	3.97704	Infinity	Infinity
716.3/5.7 (69696)	716.345	5.7	3.41407	0.00197	59.3248	0	0	0	81.5959	0	59.3248	Infinity	Infinity
644.4/5.1 (64200)	644.398	5.13	3.41176	0.00198	24.572	0	0	0	33.8194	0	24.572	Infinity	Infinity
688.4/5.8 (67758)	688.383	5.83	3.41147	0.00198	43.8037	0	0	0	60.2939	0	43.8037	Infinity	Infinity
404.7/4.0 (34419)	404.668	4.04	3.38549	0.00212	11.4091	0	1.41426	0	15.8246	0	11.4091	Infinity	Infinity
165.1/4.1 (9166)	165.053	4.07	3.37229	0.00219	18.7798	0	0	0	26.1499	0	18.7798	Infinity	Infinity
361.0/1.6 (28380)	361.01	1.55	3.37261	0.00219	20.9359	0	6.18313	0	29.1495	0	20.9359	Infinity	Infinity
668.0/6.1 (66230)	668.047	6.15	3.35189	0.00231	2.44846	0	0	0	3.43011	0	2.44846	Infinity	Infinity
616.4/12.7 (61687)	616.368	12.68	3.34104	0.00238	392.154	0	184.372	0	551.161	0	392.154	Infinity	Infinity
179.0/6.8 (9989)	179.033	6.83	3.33633	0.00241	73.049	0	24.7326	0	102.814	0	73.049	Infinity	Infinity
584.3/3.5 (58251)	584.287	3.53	3.31565	0.00254	2.29389	0	0	0	3.24868	0	2.29389	Infinity	Infinity
650.6/5.7 (64710)	650.617	5.68	3.30315	0.00262	4.9834	0	0	0	7.08436	0	4.9834	Infinity	Infinity
742.3/4.0 (71324)	742.349	4	3.2998	0.00264	129.199	0	76.9763	0	183.855	0	129.199	Infinity	Infinity
229.0/1.7 (13174)	229.031	1.69	3.23735	0.0031	2.72661	0	0	0	3.95492	0	2.72661	Infinity	Infinity
358.1/7.9 (27977)	358.149	7.95	3.2322	0.00314	5.04655	0	3.14055	0	7.33163	0	5.04655	Infinity	Infinity
595.0/4.9 (59388)	594.965	4.92	3.21983	0.00324	24.5329	0	11.6724	0	35.7783	0	24.5329	Infinity	Infinity
390.0/1.1 (32398)	390.031	1.06	3.21584	0.00327	16.0459	0	0	0	23.4301	0	16.0459	Infinity	Infinity
522.8/6.5 (50891)	522.757	6.5	3.2165	0.00327	10.9826	0	0	0	16.0335	0	10.9826	Infinity	Infinity
427.3/15.8 (37620)	427.284	15.83	3.20834	0.00333	6.53387	0	0	0	9.563	0	6.53387	Infinity	Infinity
466.2/8.1 (43113)	466.183	8.15	3.20361	0.00337	44.9766	0	3.18894	0	65.9252	0	44.9766	Infinity	Infinity
487.4/9.8 (46140)	487.359	9.79	3.19885	0.00342	14.8271	0	7.63093	0	21.7654	0	14.8271	Infinity	Infinity
279.1/1.3 (17360)	279.083	1.3	3.19072	0.00349	865.099	0	267.253	0	1273.16	0	865.099	Infinity	Infinity
414.1/8.0 (35716)	414.114	7.96	3.17312	0.00364	11.4224	0	4.46528	0	16.9035	0	11.4224	Infinity	Infinity
259.1/4.2 (15588)	259.081	4.17	3.1462	0.0039	10.2491	0	4.28325	0	15.297	0	10.2491	Infinity	Infinity
467.7/4.5 (43347)	467.737	4.45	3.14478	0.00391	18.2154	0	0	0	27.199	0	18.2154	Infinity	Infinity
141.1/5.3 (7659)	141.054	5.28	3.14469	0.00392	24.658	0	0	0	36.8201	0	24.658	Infinity	Infinity
421.0/1.1 (36675)	421.009	1.11	3.13174	0.00404	12.454	0	0	0	18.6736	0	12.454	Infinity	Infinity
656.4/4.1 (65179)	656.369	4.05	3.13102	0.00405	11.496	0	0	0	17.2411	0	11.496	Infinity	Infinity
608.3/6.3 (60802)	608.287	6.31	3.12797	0.00408	3.10775	0	0	0	4.66539	0	3.10775	Infinity	Infinity
569.3/1.1 (56604)	569.268	1.14	3.12763	0.00409	117.379	0	0	0	176.229	0	117.379	Infinity	Infinity
346.1/1.3 (25906)	346.058	1.26	3.11941	0.00417	10.0189	0	0	0	15.0817	0	10.0189	Infinity	Infinity
767.3/4.3 (72775)	767.331	4.26	3.1181	0.00419	4.46475	0	0	0	6.72373	0	4.46475	Infinity	Infinity
127.0/3.7 (6880)	127.038	3.67	3.11613	0.00421	26.15	0	0	0	39.4058	0	26.15	Infinity	Infinity
430.1/1.2 (38028)	430.124	1.23	3.11545	0.00421	3.57721	0	0	0	5.39172	0	3.57721	Infinity	Infinity
622.8/5.8 (62367)	622.822	5.84	3.11372	0.00423	10.2799	0	0	0	15.503	0	10.2799	Infinity	Infinity
457.7/3.1 (41967)	457.709	3.09	3.1108	0.00426	8.41669	0	0	0	12.705	0	8.41669	Infinity	Infinity
594.3/4.0 (59328)	594.275	3.99	3.1112	0.00426	35.3737	0	0	0	53.3895	0	35.3737	Infinity	Infinity
567.2/1.1 (56380)	567.236	1.14	3.10926	0.00428	86.9731	0	0	0	131.351	0	86.9731	Infinity	Infinity
287.1/7.7 (18284)	287.054	7.72	3.10698	0.0043	10.0545	0	0	0	15.1959	0	10.0545	Infinity	Infinity
279.1/1.1 (17359)	279.081	1.09	3.10657	0.00431	885.711	0	0	0	1338.8	0	885.711	Infinity	Infinity
471.2/5.2 (43856)	471.244	5.22	3.10407	0.00434	48.0375	0	0	0	72.6695	0	48.0375	Infinity	Infinity
579.3/3.8 (57749)	579.251	3.82	3.10163	0.00436	2.48946	0	0	0	3.76894	0	2.48946	Infinity	Infinity
471.2/2.6 (43830)	471.209	2.62	3.09757	0.00441	47.7317	0	0	0	72.3587	0	47.7317	Infinity	Infinity
376.1/7.9 (30456)	376.122	7.85	3.08975	0.00449	10.2814	0	0	0	15.6255	0	10.2814	Infinity	Infinity
680.3/3.8 (67156)	680.34	3.83	3.08953	0.0045	6.06079	0	0	0	9.21172	0	6.06079	Infinity	Infinity
744.4/6.3 (71438)	744.363	6.28	3.07902	0.00462	14.6766	0	0	0	22.383	0	14.6766	Infinity	Infinity
327.2/4.6 (22662)	327.185	4.59	3.0751	0.00466	22.421	0	0	0	34.2373	0	22.421	Infinity	Infinity
494.2/1.1 (47056)	494.221	1.13	3.07488	0.00466	74.4612	0	0	0	113.712	0	74.4612	Infinity	Infinity
166.1/1.4 (9248)	166.086	1.4	3.06759	0.00475	3154.96	0	0	0	4829.48	0	3154.96	Infinity	Infinity
597.5/5.1 (59682)	597.535	5.13	3.06738	0.00475	85.9269	0	14.933	0	131.543	0	85.9269	Infinity	Infinity
224.1/1.1 (12791)	224.137	1.14	3.06668	0.00476	17.1629	0	0	0	26.28	0	17.1629	Infinity	Infinity
471.2/6.3 (43850)	471.238	6.31	3.06573	0.00477	13.9224	0	0	0	21.3248	0	13.9224	Infinity	Infinity
362.2/7.0 (28569)	362.16	7	3.06489	0.00478	12.8422	0	0	0	19.6756	0	12.8422	Infinity	Infinity
211.1/1.1 (11910)	211.117	1.11	3.0616	0.00482	1.39458	0	0	0	2.13894	0	1.39458	Infinity	Infinity
178.6/2.6 (9983)	178.612	2.62	3.05795	0.00486	167.012	0	0	0	256.461	0	167.012	Infinity	Infinity
227.0/1.2 (12938)	227.014	1.17	3.05356	0.00492	30.6184	0	0	0	47.0848	0	30.6184	Infinity	Infinity
406.1/5.4 (34567)	406.059	5.37	3.05141	0.00494	15.1393	0	0	0	23.2975	0	15.1393	Infinity	Infinity
204.1/1.1 (11516)	204.128	1.14	3.04775	0.00499	45.9732	0	0	0	70.832	0	45.9732	Infinity	Infinity
251.1/4.2 (14965)	251.139	4.15	3.04602	0.00501	9.48026	0	0	0	14.6148	0	9.48026	Infinity	Infinity
309.1/2.9 (20360)	309.055	2.89	3.04415	0.00503	1.70938	0	0	0	2.63679	0	1.70938	Infinity	Infinity
357.0/1.1 (27817)	357.034	1.07	3.04094	0.00507	7.84883	0	0	0	12.12	0	7.84883	Infinity	Infinity
649.0/1.4 (64566)	648.988	1.41	3.04011	0.00509	5.74125	0	2.14813	0	8.86791	0	5.74125	Infinity	Infinity
659.3/5.3 (65537)	659.324	5.26	3.03433	0.00516	12.1684	0	0	0	18.831	0	12.1684	Infinity	Infinity
187.1/2.2 (10454)	187.125	2.17	3.03153	0.0052	30.6817	0	1.90199	0	47.525	0	30.6817	Infinity	Infinity
356.2/2.6 (27751)	356.216	2.61	3.031	0.0052	68.5278	0	0	0	106.166	0	68.5278	Infinity	Infinity
444.7/3.6 (40160)	444.716	3.63	3.02987	0.00522	2.15946	0	0	0	3.34676	0	2.15946	Infinity	Infinity
103.1/1.4 (5801)	103.054	1.44	3.02302	0.00531	165.566	0	0	0	257.179	0	165.566	Infinity	Infinity
516.0/1.4 (49997)	516.02	1.36	3.01802	0.00537	5.09207	0	0	0	7.92275	0	5.09207	Infinity	Infinity
427.4/14.2 (37635)	427.392	14.17	3.01281	0.00544	52.5111	0	0	0	81.8433	0	52.5111	Infinity	Infinity
343.1/3.8 (25415)	343.113	3.81	3.01123	0.00546	1.64726	0	0	0	2.56875	0	1.64726	Infinity	Infinity
233.1/1.3 (13581)	233.078	1.32	3.00786	0.00551	5.87754	0	2.66563	0	9.17576	0	5.87754	Infinity	Infinity
604.3/10.3 (60430)	604.338	10.29	3.00599	0.00553	5.54023	0	0	0	8.65455	0	5.54023	Infinity	Infinity
789.4/6.2 (73935)	789.42	6.21	3.0031	0.00557	6.25699	0	0	0	9.78363	0	6.25699	Infinity	Infinity
373.1/5.1 (30061)	373.134	5.13	3.00189	0.00559	2.61706	0	0	0	4.09377	0	2.61706	Infinity	Infinity
284.1/6.4 (18004)	284.138	6.35	3.00123	0.0056	17.6545	0	0	0	27.6223	0	17.6545	Infinity	Infinity
500.1/1.3 (47831)	500.077	1.27	3.00151	0.0056	2.49464	0	0	0	3.90276	0	2.49464	Infinity	Infinity
570.4/7.7 (56765)	570.361	7.74	2.98211	0.00587	9.41052	0	0	0	14.8182	0	9.41052	Infinity	Infinity
200.1/2.7 (11186)	200.091	2.71	2.97952	0.00591	16.258	0	0	0	25.6228	0	16.258	Infinity	Infinity
577.7/4.1 (57578)	577.712	4.07	2.97516	0.00597	21.82	0	0	0	34.4388	0	21.82	Infinity	Infinity
251.1/4.3 (14961)	251.138	4.28	2.97403	0.00599	9.64312	0	0	0	15.2257	0	9.64312	Infinity	Infinity
447.2/4.7 (40519)	447.241	4.7	2.96673	0.0061	2.19921	0	0	0	3.48091	0	2.19921	Infinity	Infinity
481.0/1.3 (45113)	480.976	1.27	2.96247	0.00616	5.49535	0	0	0	8.71055	0	5.49535	Infinity	Infinity
305.2/7.4 (20023)	305.185	7.37	2.95779	0.00623	13.4525	0	0	0	21.357	0	13.4525	Infinity	Infinity
499.3/5.5 (47756)	499.286	5.46	2.95779	0.00623	9.91446	0	0	0	15.74	0	9.91446	Infinity	Infinity
198.2/10.3 (11074)	198.22	10.27	2.95565	0.00627	13.4918	0	0	0	21.4348	0	13.4918	Infinity	Infinity
332.1/7.2 (23442)	332.148	7.19	2.95534	0.00627	7.95392	0	0	0	12.638	0	7.95392	Infinity	Infinity
153.1/4.8 (8403)	153.054	4.79	2.95286	0.00631	123.95	0	0	0	197.11	0	123.95	Infinity	Infinity
497.1/1.4 (47428)	497.071	1.36	2.95007	0.00635	4.92949	0	0	0	7.84646	0	4.92949	Infinity	Infinity
791.4/7.6 (74038)	791.352	7.6	2.94988	0.00636	4.10532	0	0	0	6.53502	0	4.10532	Infinity	Infinity
339.2/4.5 (24702)	339.165	4.51	2.94877	0.00637	3.46306	0	0	0	5.51471	0	3.46306	Infinity	Infinity
440.1/6.8 (39433)	440.147	6.82	2.94915	0.00637	83.1617	0	0	0	132.413	0	83.1617	Infinity	Infinity
224.1/3.9 (12790)	224.126	3.92	2.919	0.00686	5.10129	0	0	0	8.20634	0	5.10129	Infinity	Infinity
556.3/4.9 (55119)	556.293	4.89	2.91889	0.00686	18.1111	0	0	0	29.1362	0	18.1111	Infinity	Infinity
441.1/2.7 (39589)	441.127	2.7	2.9164	0.0069	24.7117	0	0	0	39.7888	0	24.7117	Infinity	Infinity
790.4/4.3 (73985)	790.381	4.34	2.9148	0.00693	3.27975	0	0	0	5.28368	0	3.27975	Infinity	Infinity
391.1/1.6 (32543)	391.138	1.64	2.90969	0.00701	78.223	0	16.8374	0	126.239	0	78.223	Infinity	Infinity
507.2/4.9 (48763)	507.218	4.9	2.90284	0.00713	151.961	0	0	0	245.818	0	151.961	Infinity	Infinity
350.2/3.6 (26624)	350.155	3.55	2.88998	0.00736	1.20624	0	0	0	1.95994	0	1.20624	Infinity	Infinity
521.2/8.6 (50698)	521.232	8.55	2.88183	0.00751	19.7476	0	0	0	32.1773	0	19.7476	Infinity	Infinity
333.2/3.8 (23605)	333.164	3.84	2.88071	0.00753	1.68441	0	0	0	2.7457	0	1.68441	Infinity	Infinity
300.1/2.7 (19447)	300.117	2.73	2.87926	0.00756	70.3485	0	2.38269	0	114.73	0	70.3485	Infinity	Infinity
181.0/4.8 (10063)	181.049	4.75	2.87165	0.0077	1910.34	0	0	0	3123.8	0	1910.34	Infinity	Infinity
594.4/12.7 (59369)	594.386	12.68	2.86161	0.00789	603.929	0	282.15	0	991.013	0	603.929	Infinity	Infinity
443.0/1.3 (39874)	443	1.28	2.85661	0.00798	5.60791	0	0	0	9.21838	0	5.60791	Infinity	Infinity
592.8/5.3 (59172)	592.834	5.31	2.85352	0.00804	33.9363	0	0	0	55.8454	0	33.9363	Infinity	Infinity
209.1/7.9 (11749)	209.078	7.92	2.84282	0.00826	10.1579	0	1.18538	0	16.7788	0	10.1579	Infinity	Infinity
492.2/3.9 (46781)	492.241	3.89	2.83494	0.00841	7.2519	0	0	0	12.0119	0	7.2519	Infinity	Infinity
224.1/4.1 (12789)	224.125	4.11	2.83055	0.0085	2.86816	0	0	0	4.75813	0	2.86816	Infinity	Infinity
529.3/5.2 (51836)	529.333	5.16	2.8134	0.00886	16.9413	0	0	0	28.276	0	16.9413	Infinity	Infinity
371.7/4.1 (29870)	371.679	4.12	2.80456	0.00906	92.8698	0	0	0	155.494	0	92.8698	Infinity	Infinity
523.2/6.2 (50954)	523.239	6.16	2.80195	0.00911	8.86242	0	0	0	14.8524	0	8.86242	Infinity	Infinity
719.9/3.3 (69941)	719.875	3.26	2.7959	0.00925	26.971	0	0	0	45.298	0	26.971	Infinity	Infinity
449.2/1.2 (40729)	449.159	1.17	2.78736	0.00944	5.18877	0	0	0	8.74129	0	5.18877	Infinity	Infinity
666.2/13.7 (66064)	666.242	13.72	2.7817	0.00957	3.67618	0	0	0	6.2057	0	3.67618	Infinity	Infinity
414.0/4.8 (35706)	414.002	4.79	2.78029	0.0096	641.21	0	0	0	1082.96	0	641.21	Infinity	Infinity
609.2/4.7 (60880)	609.174	4.74	2.77006	0.00984	6.32028	0	0	0	10.714	0	6.32028	Infinity	Infinity
371.7/4.0 (29871)	371.679	4	2.76453	0.00997	138.113	0	0	0	234.595	0	138.113	Infinity	Infinity
345.2/14.1 (25825)	345.206	14.15	8.82623	1.4048e-09	1341.68	7.82937e-09	1046.88	0	713.804	3.58787e-08	1341.68	1.71365e+11	11.2339
485.7/4.0 (45878)	485.698	3.95	3.46955	0.00171	74.697	0.0011556	11.7469	0	101.094	0.00529564	74.6958	64639	4.81049
120.1/1.4 (6580)	120.081	1.4	3.05631	0.00488	3759.75	0.167456	0	0	5776.25	0.767379	3759.59	22452.2	4.35126
345.2/15.2 (25863)	345.243	15.17	10.8645	1.4963e-11	304.61	0.0352495	291.82	0	131.64	0.161534	304.575	8641.53	3.93659
427.3/13.9 (37622)	427.286	13.92	11.2003	7.4454e-12	1132.05	0.132324	992.191	0	474.558	0.606384	1131.92	8555.14	3.93223
769.9/6.0 (72902)	769.86	5.97	16.1942	9.4699e-16	270.575	0.03516	295.673	0	78.4467	0.117805	270.54	7695.53	3.88624
285.1/2.2 (18123)	285.144	2.16	3.11351	0.00423	14.3209	0.00191843	1.89623	0	21.5956	0.00879135	14.319	7464.89	3.87302
345.2/13.9 (25827)	345.208	13.91	8.90204	1.1751e-09	77.4362	0.0284774	61.6303	0	40.8313	0.1305	77.4077	2719.22	3.43444
327.2/14.1 (22672)	327.196	14.14	8.43597	3.5658e-09	173.832	0.0915802	117.789	0	96.7074	0.419673	173.74	1898.14	3.27833
609.2/7.2 (60882)	609.194	7.18	4.38668	0.00015	74.5282	0.0436217	36.6407	0	79.7317	0.1999	74.4846	1708.51	3.23262
615.4/6.6 (61555)	615.378	6.61	6.05915	1.5611e-06	145.262	0.0853835	142.038	0	112.508	0.391277	145.177	1701.29	3.23078
493.7/4.3 (46994)	493.691	4.3	4.0955	0.00033	60.5587	0.0372673	33.4751	0	69.391	0.17078	60.5215	1624.98	3.21085
335.1/7.9 (23882)	335.105	7.95	3.74929	0.00082	42.2528	0.0292272	0	0	52.8819	0.133936	42.2235	1445.67	3.16007
409.3/13.9 (35046)	409.275	13.92	8.22558	5.9409e-09	213.484	0.149599	197.342	0	121.781	0.685549	213.334	1427.04	3.15444
227.1/5.2 (12997)	227.127	5.2	2.78651	0.00946	39.0807	0.0296848	0	0	65.8071	0.136033	39.051	1316.52	3.11943
449.3/13.9 (40796)	449.268	13.92	11.6089	3.2418e-12	350.776	0.290849	329.852	0	141.753	1.33284	350.485	1206.04	3.08136
435.3/13.8 (38797)	435.252	13.79	3.31505	0.00254	22.8785	0.023071	0	0	32.374	0.105725	22.8554	991.655	2.99636
273.2/8.4 (16887)	273.161	8.37	7.50057	3.6047e-08	45.0668	0.0469423	55.6172	0	28.1827	0.215117	45.0199	960.046	2.98229
198.1/1.2 (11045)	198.076	1.17	7.75576	1.8964e-08	345.046	0.373051	396.887	0	208.665	1.70954	344.673	924.928	2.96611
141.1/3.9 (7662)	141.054	3.88	2.83108	0.00849	122.227	0.135319	2.80523	0	202.505	0.427793	122.092	903.252	2.95581
689.4/5.8 (67831)	689.362	5.79	3.88154	0.00058	68.719	0.0841041	0	0	83.0297	0.385414	68.6349	817.07	2.91226
675.3/3.5 (66729)	675.281	3.5	3.84761	0.00063	190.403	0.240673	17.0991	0	232.075	0.916352	190.162	791.127	2.89825
766.4/6.9 (72724)	766.357	6.88	11.7892	2.2604e-12	206.825	0.287981	255.344	0	82.2392	1.31969	206.537	718.192	2.85624
599.3/4.1 (59890)	599.339	4.14	4.78867	4.9423e-05	66.0951	0.108028	106.454	0	64.7018	0.495045	65.9871	611.835	2.78663
141.1/4.0 (7660)	141.054	4.04	2.92372	0.00678	132.241	0.220792	92.1243	0	212.029	1.0118	132.02	598.937	2.77738
235.1/7.0 (13714)	235.143	7	7.01702	1.2442e-07	167.229	0.282917	140.588	0	111.7	1.29649	166.946	591.087	2.77165
654.3/5.8 (64992)	654.318	5.8	3.93232	0.0005	154.046	0.280138	0	0	183.611	0.987491	153.766	549.894	2.74028
229.2/3.8 (13268)	229.154	3.82	3.17469	0.00363	381.699	0.694318	157.147	0	563.529	3.18177	381.005	549.747	2.74016
585.3/3.6 (58368)	585.297	3.6	4.48896	0.00011	87.033	0.185676	102.841	0	90.8379	0.850875	86.8473	468.736	2.67093
654.8/6.1 (65036)	654.821	6.15	20.3838	2.4627e-18	998.321	2.13249	1026.98	0	229.4	4.04281	996.189	468.149	2.67038
546.3/5.1 (53844)	546.293	5.09	4.00623	0.00041	55.7211	0.119626	42.877	0	65.1652	0.548196	55.6015	465.794	2.66819
187.1/2.7 (10455)	187.126	2.71	3.00152	0.0056	38.5359	0.0998133	0	0	60.1272	0.457402	38.4361	386.08	2.58668
503.2/7.4 (48239)	503.225	7.44	4.67536	6.7354e-05	20.6415	0.0541388	13.3692	0	20.6734	0.248095	20.5873	381.269	2.58123
642.4/5.2 (64014)	642.383	5.17	4.07029	0.00035	359.41	0.947866	300.409	0	413.525	2.57627	358.462	379.178	2.57884
485.3/5.0 (45816)	485.26	4.98	3.62397	0.00114	504.854	1.38017	8.41432	0	652.298	6.32471	503.474	365.792	2.56323
474.3/13.3 (44255)	474.26	13.3	4.50417	0.00011	27.7182	0.0763704	19.9197	0	28.8123	0.347264	27.6419	362.945	2.55984
568.3/14.0 (56541)	568.335	14.04	9.55184	2.6224e-10	614.08	1.88149	683.345	0	300.69	8.07455	612.198	326.38	2.51372
742.3/4.2 (71322)	742.349	4.23	3.94048	0.00049	150.615	0.473255	139.1	0	178.896	1.82584	150.142	318.254	2.50277
584.3/14.0 (58265)	584.309	14.04	8.61677	2.3103e-09	265.292	0.871998	308.444	0	144.022	2.93252	264.42	304.235	2.48321
463.3/15.8 (42771)	463.285	15.82	6.17725	1.1374e-06	47.0067	0.156017	40.2601	0	35.6041	0.539897	46.8507	301.291	2.47899
339.1/1.1 (24643)	339.061	1.07	20.6543	1.7409e-18	342.987	1.16248	360.532	0	77.4923	3.70835	341.825	295.048	2.46989
521.2/8.5 (50703)	521.233	8.45	3.23818	0.00309	12.8405	0.0459671	0	0	18.5506	0.210648	12.7946	279.342	2.44614
608.3/13.9 (60820)	608.309	13.88	9.12255	7.0195e-10	502.309	1.81724	562.757	0	257.508	4.85997	500.492	276.413	2.44156
740.4/5.6 (71225)	740.372	5.57	3.97813	0.00045	27.9873	0.104145	30.8512	0	32.9043	0.477251	27.8831	268.734	2.42932
467.3/14.1 (43311)	467.277	14.15	3.10255	0.00435	62.6859	0.257567	0	0	94.4769	0.822054	62.4283	243.377	2.38628
332.1/6.6 (23440)	332.147	6.6	3.6472	0.00107	30.169	0.125458	8.66954	0	38.6757	0.399007	30.0436	240.471	2.38106
334.1/4.8 (23757)	334.149	4.78	4.25455	0.00021	44.5497	0.187577	28.3376	0	48.9436	0.859586	44.3622	237.501	2.37567
272.7/14.3 (16834)	272.665	14.32	7.81576	1.6326e-08	69.9099	0.312739	89.2764	0	41.794	0.823474	69.5972	223.541	2.34936
566.7/4.1 (56327)	566.72	4.07	3.50012	0.00158	291.095	1.32584	0	0	388.633	6.07574	289.769	219.556	2.34154
534.3/12.8 (52398)	534.321	12.77	4.75452	5.4258e-05	70.0108	0.334984	79.3387	0	68.7717	1.53509	69.6758	208.998	2.32014
100.1/2.9 (5719)	100.076	2.92	3.40345	0.00202	43.6349	0.228607	18.5264	0	59.8648	1.04761	43.4063	190.873	2.28075
323.0/1.1 (21982)	323.044	1.1	5.6948	4.1734e-06	86.582	0.454835	74.1249	0	70.9411	2.08432	86.1272	190.359	2.27957
642.3/4.0 (63984)	642.343	3.97	3.37658	0.00217	17.8524	0.0947376	8.49697	0	24.6856	0.434142	17.7576	188.44	2.27517
577.7/3.9 (57579)	577.713	3.9	3.39739	0.00206	19.3714	0.122171	0	0	26.5908	0.559859	19.2492	158.559	2.20019
480.2/1.2 (44985)	480.17	1.17	3.10752	0.0043	20.8621	0.131945	0	0	31.3106	0.604646	20.7302	158.113	2.19897
770.3/5.6 (72913)	770.342	5.59	4.0336	0.00038	35.6306	0.227932	28.6303	0	41.1855	0.974672	35.4027	156.321	2.19402
350.1/5.9 (26620)	350.149	5.91	3.6513	0.00106	16.3882	0.107119	0	0	20.9238	0.49088	16.281	152.991	2.18466
169.1/4.5 (9390)	169.076	4.45	3.75751	0.0008	43.3138	0.287613	0	0	53.7541	0.820016	43.0262	150.598	2.17782
389.7/3.5 (32370)	389.689	3.47	4.28495	0.00019	51.4508	0.345368	26.4062	0	55.9778	1.09863	51.1054	148.974	2.17311
274.2/9.5 (17055)	274.163	9.47	6.36371	6.9169e-07	56.6094	0.381408	56.7541	0	41.4565	1.05945	56.228	148.422	2.1715
222.1/7.8 (12688)	222.112	7.8	3.39646	0.00206	18.3257	0.123803	12.4562	0	25.1571	0.395634	18.2019	148.023	2.17033
240.1/3.0 (14044)	240.085	2.95	2.83914	0.00833	18.5828	0.129423	0	0	30.5062	0.59309	18.4534	143.582	2.1571
688.4/5.7 (67761)	688.388	5.73	4.13784	0.00029	48.3439	0.349656	48.9451	0	54.428	1.27418	47.9943	138.262	2.1407
755.4/4.1 (72091)	755.416	4.14	2.88981	0.00736	98.6239	0.71616	10.6326	0	159.057	2.1596	97.9078	137.712	2.13897
727.3/4.6 (70424)	727.32	4.57	3.50334	0.00156	15.0558	0.114036	10.2865	0	20.0103	0.522579	14.9417	132.026	2.12066
731.4/5.2 (70679)	731.389	5.23	5.48964	7.2867e-06	81.0308	0.628119	86.508	0	68.6243	2.87841	80.4027	129.005	2.11061
428.1/5.2 (37690)	428.143	5.22	3.80592	0.00071	46.0914	0.37393	0	0	56.3411	1.71356	45.7174	123.262	2.09083
771.3/5.8 (72973)	771.348	5.8	14.7901	9.2794e-15	87.765	0.733169	100.427	0	27.332	2.56809	87.0318	119.706	2.07812
504.8/5.1 (48449)	504.756	5.12	3.09007	0.00449	11.5907	0.097628	0	0	17.4507	0.447388	11.493	118.723	2.07453
649.3/5.2 (64587)	649.282	5.22	3.97783	0.00045	38.6421	0.332502	15.0994	0	45.1594	1.52372	38.3096	116.216	2.06527
343.0/1.4 (25402)	343.044	1.42	2.99633	0.00567	17.6283	0.154941	6.24028	0	27.3715	0.516487	17.4734	113.774	2.05604
780.3/6.0 (73458)	780.347	5.98	9.25819	5.1294e-10	50.69	0.457916	53.2992	0	25.2607	2.09843	50.2321	110.697	2.04414
394.7/3.9 (33038)	394.721	3.89	2.76964	0.00985	3.71894	0.0341913	0	0	6.24232	0.156684	3.68475	108.769	2.0365
461.2/6.2 (42473)	461.214	6.2	6.24561	9.4749e-07	27.4365	0.264095	22.6467	0	20.3397	1.21023	27.1724	103.889	2.01657
599.3/3.9 (59886)	599.338	3.86	3.78207	0.00075	47.1626	0.461941	27.918	0	57.8859	2.11688	46.7006	102.097	2.00901
211.1/5.2 (11918)	211.144	5.22	3.047	0.005	331.304	3.25115	2.98575	0	505.512	4.54085	328.053	101.904	2.00819
627.3/4.0 (62753)	627.286	3.99	3.29738	0.00266	77.0638	0.756491	44.4468	0	108.58	2.75596	76.3073	101.87	2.00805
410.1/7.1 (35121)	410.137	7.05	2.95017	0.00635	77.7323	0.819876	0	0	122.276	3.75714	76.9124	94.8098	1.97685
649.3/4.2 (64600)	649.315	4.2	3.48823	0.00163	18.3159	0.19338	0	0	24.3556	0.886177	18.1225	94.7145	1.97642
523.2/6.2 (50936)	523.202	6.24	4.28661	0.00019	68.4334	0.734084	26.2847	0	73.9699	3.364	67.6994	93.2229	1.96952
417.2/5.5 (36228)	417.176	5.51	3.95384	0.00048	91.0262	0.988838	82.3244	0	106.734	4.11128	90.0374	92.0538	1.96404
373.2/2.7 (30138)	373.245	2.71	3.05202	0.00494	400.304	4.42208	7.13484	0	608.786	12.1965	395.882	90.5238	1.95676
768.3/5.9 (72816)	768.342	5.91	3.47324	0.00169	29.8135	0.337812	0	0	39.7753	1.54805	29.4757	88.2548	1.94574
529.3/3.5 (51783)	529.262	3.55	4.64785	7.2608e-05	60.3198	0.694194	73.078	0	60.0297	3.1812	59.6256	86.8919	1.93898
652.3/13.7 (64813)	652.289	13.68	4.57548	8.8456e-05	15.5702	0.183308	11.7155	0	15.7354	0.840023	15.3869	84.9404	1.92911
548.4/14.6 (54133)	548.37	14.63	8.39651	3.9223e-09	273.247	3.31358	338.265	0	150.756	4.96047	269.933	82.4627	1.91626
405.2/1.1 (34481)	405.187	1.14	3.06083	0.00483	54.5952	0.667422	0	0	82.5912	3.05851	53.9277	81.8	1.91275
165.1/3.6 (9161)	165.053	3.57	3.32179	0.0025	12.8512	0.160572	0	0	17.9214	0.511219	12.6906	80.0336	1.90327
568.3/13.7 (56543)	568.337	13.68	9.2306	5.4663e-10	7498.03	97.1528	8778.15	4.06692	3755.5	168.498	7400.88	77.1777	1.88749
642.3/3.8 (63982)	642.342	3.79	3.03574	0.00514	10.2019	0.132809	0.107912	0	15.5454	0.608605	10.0691	76.8167	1.88546
289.6/14.3 (18570)	289.641	14.3	8.03743	9.424e-09	43.8898	0.599114	50.9332	0	25.133	1.79068	43.2907	73.2579	1.86485
606.3/13.7 (60605)	606.293	13.69	8.17741	6.6828e-09	608.39	8.33457	778.108	0	343.866	13.9469	600.056	72.996	1.8633
542.2/6.4 (53279)	542.224	6.43	3.59593	0.00123	201.717	2.82648	0	0	259.538	6.17236	198.891	71.367	1.8535
317.0/1.3 (21228)	317.034	1.27	3.74482	0.00083	11.7947	0.165787	0	0	14.5322	0.759734	11.6289	71.1433	1.85213
158.1/3.9 (8662)	158.08	3.86	3.39387	0.00208	9.74922	0.137374	0	0	13.2765	0.48779	9.61184	70.9682	1.85106
770.3/5.5 (72914)	770.343	5.47	3.36299	0.00225	35.0862	0.53031	16.9147	0	48.1735	1.7232	34.5559	66.1618	1.82061
459.2/1.2 (42169)	459.184	1.15	3.5838	0.00127	53.5983	0.821971	0	0	68.9299	3.49601	52.7763	65.2071	1.81429
239.1/4.5 (14005)	239.102	4.45	3.14994	0.00386	5.39867	0.0839297	2.45189	0	7.89953	0.384614	5.31474	64.3238	1.80837
284.1/3.1 (17985)	284.112	3.07	3.39758	0.00206	10.8395	0.168953	0	0	14.6967	0.774242	10.6705	64.1567	1.80724
490.2/6.0 (46474)	490.176	6.04	3.22146	0.00322	14.5086	0.228671	0	0	20.749	1.0479	14.2799	63.4472	1.80241
368.0/1.0 (29322)	368.042	1.02	33.5	3.8778e-24	246.939	4.11678	254.685	0	29.6461	10.5755	242.822	59.9835	1.77803
511.1/7.2 (49353)	511.129	7.16	11.9481	1.65e-12	128.885	2.16234	114.973	0	49.3412	4.28157	126.722	59.6044	1.77528
373.2/2.2 (30134)	373.244	2.17	3.53986	0.00142	304.232	5.1435	56.6722	0	394.997	23.5705	299.089	59.1489	1.77195
229.2/4.0 (13273)	229.154	4.04	3.65649	0.00105	377.734	6.42033	0	0	476.525	11.1022	371.314	58.834	1.76963
218.1/2.8 (12435)	218.081	2.75	3.22377	0.00321	83.8442	1.43918	0	0	119.689	5.72594	82.405	58.2584	1.76536
247.1/3.3 (14642)	247.11	3.26	3.08087	0.00459	85.3275	1.49361	0	0	127.534	4.96935	83.8338	57.1285	1.75685
639.4/6.6 (63777)	639.366	6.6	2.82224	0.00868	6.05394	0.107429	0	0	9.86335	0.492303	5.94651	56.3527	1.75091
574.4/15.3 (57218)	574.383	15.29	2.91259	0.00697	13.3566	0.242235	0	0	21.0703	1.11006	13.1144	55.1392	1.74146
686.4/5.5 (67621)	686.375	5.49	4.34063	0.00017	25.1337	0.459569	30.8409	0	26.4842	2.10601	24.6741	54.6896	1.7379
441.2/5.2 (39651)	441.233	5.21	3.7554	0.00081	252.515	4.65995	0	0	308.633	17.8186	247.855	54.1883	1.73391
501.8/3.6 (48059)	501.762	3.62	2.85479	0.00802	28.442	0.529539	0	0	45.7516	2.42665	27.9124	53.7108	1.73006
362.2/6.3 (28570)	362.161	6.27	2.99587	0.00568	21.0043	0.394175	0	0	32.1779	1.80634	20.6101	53.2866	1.72662
627.3/6.3 (62769)	627.317	6.28	4.69741	6.3418e-05	34.0117	0.642175	47.5821	0	33.0316	2.94282	33.3696	52.9633	1.72398
630.3/4.8 (63032)	630.34	4.77	3.69604	0.00094	23.3026	0.453931	0	0	28.8419	2.08018	22.8487	51.3351	1.71041
129.0/1.4 (6945)	128.985	1.36	2.76428	0.00998	8.66561	0.169622	2.23322	0	14.3799	0.777305	8.49599	51.0879	1.70832
465.2/4.5 (43019)	465.24	4.52	4.74684	5.5407e-05	47.3803	0.932349	59.6038	0	45.4485	4.27256	46.4479	50.8182	1.70602
337.7/3.7 (24418)	337.652	3.7	3.80195	0.00071	3.69905	0.0728822	0.690034	0	4.4474	0.333988	3.62617	50.7539	1.70547
473.2/6.0 (44110)	473.223	5.97	4.06604	0.00035	21.4042	0.422981	15.0566	0	24.0359	1.93834	20.9812	50.6031	1.70418
437.2/4.5 (39023)	437.163	4.47	4.65079	7.2027e-05	26.0682	0.516352	40.4107	0	25.5262	2.36622	25.5519	50.4854	1.70317
230.1/2.9 (13319)	230.081	2.88	4.13993	0.00029	16.488	0.330575	14.148	0	18.2521	1.0442	16.1574	49.8768	1.6979
387.0/1.4 (31969)	387.035	1.43	3.24855	0.00301	46.5908	0.968187	13.7964	0	65.7921	2.85708	45.6226	48.1217	1.68234
402.7/5.5 (34183)	402.733	5.51	2.78828	0.00942	3.04328	0.0643515	0	0	4.9951	0.294896	2.97893	47.2915	1.67478
261.1/3.9 (15828)	261.144	3.88	3.01705	0.00539	277.336	6.02247	0	0	420.012	27.5984	271.313	46.0502	1.66323
486.2/4.0 (45926)	486.211	4	2.97584	0.00596	87.6915	1.92932	0	0	134.605	8.84124	85.7622	45.4521	1.65755
503.2/6.2 (48249)	503.249	6.21	3.7455	0.00083	175.177	3.85687	0	0	214.218	9.85789	171.32	45.4194	1.65724
670.4/6.0 (66428)	670.411	5.99	4.50122	0.00011	161.347	3.65059	169.129	0	163.469	11.6949	157.696	44.1975	1.6454
546.4/14.0 (53886)	546.354	14.04	9.28182	4.8577e-10	3617.46	85.2979	4073.53	57.0385	1779.95	99.9005	3532.17	42.4098	1.62747
746.4/1.1 (71579)	746.368	1.13	7.11734	9.6001e-08	86.8887	2.06735	103.777	0	54.9221	6.79085	84.8214	42.029	1.62355
407.2/6.3 (34747)	407.225	6.28	3.56525	0.00133	20.798	0.511526	0	0	26.5042	2.13877	20.2865	40.6587	1.60915
504.3/14.3 (48431)	504.344	14.34	6.98425	1.3545e-07	89.7007	2.25316	105.353	0	58.0542	5.87987	87.4475	39.8111	1.6
622.8/6.0 (62366)	622.821	5.97	3.34948	0.00233	24.1853	0.619503	0	0	32.8628	2.14677	23.5658	39.0399	1.59151
589.3/4.1 (58790)	589.28	4.07	3.60272	0.00121	21.2323	0.554755	0	0	26.6494	2.54221	20.6775	38.2732	1.58289
335.1/8.8 (23874)	335.102	8.78	7.95068	1.1676e-08	233.72	6.16479	189.706	0	130.78	19.5865	227.555	37.9121	1.57878
572.4/14.4 (56980)	572.369	14.39	8.92762	1.1065e-09	618.688	16.8163	724.819	5.82853	313.996	25.4905	601.872	36.7911	1.56574
436.2/2.7 (38897)	436.226	2.74	3.45654	0.00176	8.88596	0.241641	4.19961	0	11.6121	1.10734	8.64432	36.7733	1.56553
723.5/15.9 (70213)	723.538	15.94	2.82611	0.0086	7.17443	0.19701	0	0	11.5052	0.902814	6.97742	36.4165	1.5613
306.7/4.5 (20135)	306.708	4.53	3.52402	0.00148	50.4017	1.3845	34.3722	0	64.923	4.52102	49.0172	36.4042	1.56115
690.3/6.4 (67907)	690.344	6.35	3.68208	0.00098	55.2478	1.52134	11.7337	0	68.1624	4.40415	53.7265	36.3153	1.56009
325.1/4.8 (22286)	325.141	4.77	3.13258	0.00404	2.78697	0.0771049	0	0	4.02349	0.353339	2.70987	36.1452	1.55805
741.4/5.0 (71291)	741.423	5.03	2.98788	0.00579	40.2472	1.13076	0	0	61.2717	3.16252	39.1165	35.5931	1.55137
722.3/5.5 (70121)	722.337	5.5	4.10808	0.00031	21.6536	0.609462	24.0909	0	23.6457	2.79291	21.0442	35.5291	1.55058
760.4/4.9 (72356)	760.379	4.9	2.81146	0.00891	34.2671	0.967497	0	0	55.1739	4.43363	33.2996	35.4183	1.54923
543.3/3.4 (53450)	543.283	3.38	3.75099	0.00082	64.5313	1.84693	0	0	77.9218	5.86862	62.6843	34.9396	1.54332
390.2/3.8 (32421)	390.166	3.78	4.22438	0.00023	21.636	0.624526	15.918	0	23.0979	2.18959	21.0114	34.6438	1.53963
290.1/1.1 (18582)	290.097	1.13	22.2424	2.4548e-19	140.885	4.11987	142.869	0	25.491	8.57641	136.765	34.1965	1.53398
503.3/1.1 (48263)	503.27	1.14	3.41756	0.00195	102.844	3.0349	0	0	135.364	13.9077	99.8096	33.8872	1.53004
330.1/1.1 (23066)	330.09	1.09	21.0748	1.0232e-18	1081.51	32.056	1110.03	0	213.958	59.6635	1049.45	33.7382	1.52812
614.3/3.4 (61432)	614.32	3.35	2.98319	0.00586	12.1429	0.385577	0	0	18.2948	1.76693	11.7573	31.4928	1.49821
354.1/5.5 (27407)	354.084	5.54	2.80991	0.00894	4.86148	0.154392	0	0	7.78624	0.707511	4.70709	31.488	1.49815
507.7/2.9 (48865)	507.743	2.86	3.04989	0.00496	9.28144	0.299731	0	0	13.657	1.37354	8.9817	30.9659	1.49088
644.3/1.1 (64167)	644.326	1.12	4.3791	0.00015	81.5011	2.67403	95.2633	0	82.2765	12.2539	78.8271	30.4788	1.484
629.3/15.3 (62942)	629.32	15.26	3.01849	0.00537	6.25064	0.206671	0	0	9.28232	0.947086	6.04397	30.2444	1.48064
711.3/5.1 (69367)	711.283	5.13	4.23207	0.00022	30.4155	1.02147	22.8064	0	32.2841	2.92852	29.394	29.7763	1.47387
660.4/5.0 (65637)	660.353	5	3.02878	0.00523	32.4244	1.10943	0	0	47.8799	5.08404	31.315	29.2262	1.46577
308.1/4.8 (20269)	308.103	4.77	3.32138	0.0025	30.61	1.04948	0	0	41.644	2.22531	29.5605	29.1668	1.46489
549.3/5.2 (54224)	549.271	5.17	2.86547	0.00781	17.4309	0.607767	0	0	27.2146	2.78514	16.8231	28.6802	1.45758
433.0/1.4 (38447)	432.96	1.42	3.30081	0.00263	16.5935	0.589525	3.87366	0	22.5712	1.88589	16.004	28.1472	1.44944
590.3/13.7 (58929)	590.32	13.68	8.48398	3.1763e-09	1441.79	52.2119	1757.73	38.5415	764.844	51.1442	1389.58	27.6142	1.44113
663.4/4.0 (65884)	663.368	3.98	3.4077	0.002	9.41085	0.340965	0	0	12.2515	1.5625	9.06988	27.6006	1.44092
551.0/1.4 (54432)	551.039	1.37	2.98955	0.00576	4.9667	0.182874	0	0	7.39629	0.838035	4.78383	27.1591	1.43392
352.1/1.0 (26983)	352.071	1.02	24.9187	1.1823e-20	343.475	12.6982	358.698	0	45.3955	27.0154	330.777	27.0491	1.43215
789.3/3.5 (73906)	789.324	3.46	3.10205	0.00436	28.6586	1.06515	0	0	41.1945	4.36915	27.5934	26.9058	1.42985
645.3/5.8 (64270)	645.324	5.79	3.11868	0.00418	55.2794	2.10168	0	0	78.6073	9.63113	53.1777	26.3024	1.42
446.2/5.9 (40395)	446.234	5.91	2.89965	0.00719	4.36128	0.169132	0	0	6.67732	0.775062	4.19215	25.7862	1.41139
551.3/4.0 (54454)	551.252	4.01	2.95579	0.00626	7.64498	0.297207	0	0	11.5563	1.04181	7.34777	25.7228	1.41032
592.3/13.9 (59137)	592.335	13.88	9.37415	3.9302e-10	1227.51	47.8793	1345.33	23.2089	584.182	56.2303	1179.64	25.6377	1.40888
378.1/6.4 (30725)	378.143	6.38	2.88229	0.0075	5.99336	0.237854	0	0	9.21696	1.08998	5.7555	25.1976	1.40136
254.1/1.9 (15202)	254.074	1.85	3.1713	0.00366	3.03853	0.120988	0	0	4.23012	0.554439	2.91754	25.1142	1.39992
383.2/5.5 (31438)	383.229	5.52	4.37895	0.00015	143.975	5.74031	165.7	0	143.163	24.3145	138.234	25.0813	1.39935
684.4/5.3 (67470)	684.405	5.27	3.99739	0.00042	15.5524	0.637063	7.38335	0	17.0921	2.43708	14.9154	24.4127	1.38762
285.2/2.8 (18131)	285.165	2.81	4.11223	0.00031	22.2471	0.927463	27.3796	0	23.8629	3.04828	21.3196	23.987	1.37998
357.1/5.6 (27853)	357.144	5.55	3.31031	0.00257	53.9308	2.26886	0	0	71.4157	10.3972	51.6619	23.77	1.37603
739.4/4.7 (71189)	739.421	4.67	3.63839	0.0011	38.0981	1.61422	20.6637	0	45.6106	7.39727	36.4839	23.6016	1.37294
659.4/7.2 (65566)	659.373	7.15	2.95709	0.00624	17.2167	0.732263	0	0	25.6333	3.35565	16.4844	23.5116	1.37128
530.1/1.4 (51882)	530.145	1.41	3.43909	0.00185	39.9436	1.72826	12.964	0	51.6021	4.89582	38.2154	23.1121	1.36384
453.0/1.3 (41277)	452.954	1.3	4.32223	0.00018	24.7943	1.07383	19.5779	0	25.2801	3.16396	23.7205	23.0897	1.36342
315.1/1.0 (20991)	315.058	1.02	9.28865	4.782e-10	43.6498	1.89219	44.0233	0	20.6038	2.90625	41.7576	23.0684	1.36302
642.4/5.3 (64007)	642.378	5.3	3.62861	0.00113	328.086	14.3335	0	0	404.119	24.8501	313.753	22.8895	1.35964
775.3/5.5 (73198)	775.323	5.48	3.37671	0.00217	14.6236	0.645078	0	0	18.8686	2.95612	13.9785	22.6695	1.35544
300.1/1.1 (19448)	300.118	1.14	8.71404	1.8324e-09	258.971	11.4327	263.196	0	131.644	13.6076	247.538	22.6517	1.3551
760.4/6.0 (72343)	760.357	5.97	4.13737	0.00029	49.1954	2.17931	49.7764	0	51.9984	7.57873	47.0161	22.5739	1.35361
423.0/1.4 (36947)	423.008	1.37	3.54689	0.0014	32.5341	1.4626	13.8459	0	40.8003	3.31589	31.0715	22.244	1.34721
640.2/4.2 (63809)	640.245	4.17	3.38917	0.0021	4.22936	0.190385	0	0	5.42338	0.872454	4.03898	22.2148	1.34664
501.2/4.9 (47982)	501.217	4.86	3.38396	0.00213	18.1687	0.823867	0	0	23.6777	2.73237	17.3449	22.053	1.34347
481.2/5.2 (45155)	481.211	5.22	3.79987	0.00072	238.526	10.8308	44.9958	0	276.836	31.8447	227.696	22.023	1.34288
764.3/4.0 (72599)	764.32	4.03	4.48257	0.00011	21.4596	0.986915	27.6453	0	21.0689	2.53323	20.4726	21.7441	1.33734
713.4/6.0 (69527)	713.418	5.98	4.56106	9.2002e-05	184.423	8.49107	264.03	0	177.788	21.8943	175.932	21.7197	1.33685
308.1/1.1 (20271)	308.109	1.07	21.864	3.87e-19	1736.02	80.6456	1789.58	0	300.472	120.192	1655.37	21.5265	1.33297
568.9/3.9 (56579)	568.944	3.89	2.80016	0.00915	7.03977	0.328477	0	0	11	1.50527	6.71129	21.4315	1.33105
280.7/14.3 (17638)	280.654	14.31	8.77876	1.5717e-09	233.942	10.9322	299.664	6.58832	114.61	20.9202	223.01	21.3994	1.3304
384.0/1.3 (31502)	384	1.26	3.86229	0.00061	5.4689	0.256078	4.15517	0	6.18089	0.886149	5.21283	21.3564	1.32953
603.3/1.2 (60300)	603.287	1.21	3.52992	0.00146	89.2109	4.18298	0	0	108.974	19.1688	85.0279	21.3271	1.32893
350.2/4.0 (26634)	350.168	4.01	2.8883	0.00739	6.97374	0.329798	0	0	10.534	1.51132	6.64395	21.1455	1.32522
674.4/4.9 (66694)	674.374	4.93	4.23197	0.00022	216.366	10.2726	223.389	0	225.902	22.4712	206.093	21.0624	1.32351
516.2/7.3 (50008)	516.178	7.32	4.45433	0.00012	138.196	6.56713	211.424	0	134.376	21.8928	131.629	21.0436	1.32312
500.4/14.7 (47919)	500.391	14.7	6.32236	7.7216e-07	36.9066	1.75731	30.98	0	25.2018	4.30785	35.1493	21.0017	1.32225
565.3/4.3 (56154)	565.258	4.33	2.77771	0.00966	11.2677	0.542263	0	0	17.7006	2.48496	10.7254	20.779	1.31763
528.3/14.0 (51679)	528.345	14.04	2.77005	0.00984	2.04054	0.0990478	0	0	3.21199	0.453894	1.94149	20.6016	1.3139
627.3/6.4 (62768)	627.316	6.41	3.6269	0.00113	20.486	0.99833	0	0	25.019	2.06269	19.4877	20.5203	1.31218
506.2/1.2 (48617)	506.229	1.16	8.8796	1.2388e-09	137.885	6.75626	140.73	0	49.1132	30.9611	131.129	20.4085	1.30981
279.1/2.7 (17427)	279.1	2.73	5.58987	5.5483e-06	1198.25	59.3154	1424.98	0	933.534	132.509	1138.94	20.2013	1.30538
540.3/4.0 (53069)	540.263	4	2.79718	0.00922	42.5087	2.12354	6.64569	0	66.8257	7.22903	40.3852	20.0179	1.30142
540.3/3.8 (53072)	540.266	3.81	3.39589	0.00206	25.25	1.26297	21.679	0	32.4719	4.27692	23.987	19.9925	1.30087
570.4/13.9 (56759)	570.354	13.88	9.20928	5.7422e-10	6025.2	301.937	6932.97	235.712	2881.91	290.352	5723.26	19.9552	1.30006
452.9/3.8 (41274)	452.905	3.83	3.57726	0.00129	25.2119	1.2663	0	0	30.0636	5.8029	23.9456	19.9099	1.29907
566.7/3.9 (56331)	566.723	3.9	3.779	0.00076	290.184	14.6259	183.875	0	339.132	29.8771	275.558	19.8404	1.29755
140.0/1.5 (7594)	140.002	1.45	2.93496	0.00659	21.0616	1.07218	7.93621	0	31.8347	1.93769	19.9895	19.6438	1.29323
483.2/5.7 (45474)	483.187	5.73	3.43838	0.00185	5.00474	0.257002	2.21801	0	6.21075	1.17773	4.74774	19.4736	1.28945
564.3/5.0 (56074)	564.321	5.03	3.10012	0.00438	23.8588	1.22588	0	0	33.1113	5.61768	22.6329	19.4626	1.2892
427.2/4.3 (37581)	427.218	4.28	3.55161	0.00138	215.358	11.0845	0	0	257.861	50.7957	204.274	19.4287	1.28844
540.3/5.9 (53108)	540.341	5.88	4.46666	0.00012	50.0004	2.58084	74.7139	0	48.1579	8.14868	47.4195	19.3737	1.28721
565.2/4.3 (56137)	565.176	4.31	2.77393	0.00975	15.006	0.775107	0	0	23.4264	3.55199	14.2309	19.3599	1.2869
404.7/4.2 (34420)	404.67	4.21	3.6974	0.00094	253.216	13.1055	181.77	0	303.538	18.4968	240.111	19.3214	1.28604
374.2/5.9 (30237)	374.172	5.94	3.33448	0.00242	91.2269	4.72413	0	0	120.786	10.002	86.5028	19.3108	1.2858
738.4/5.9 (71111)	738.363	5.94	3.95265	0.00048	43.8602	2.30445	35.4636	0	48.2919	6.48401	41.5557	19.0329	1.2795
369.3/13.7 (29567)	369.348	13.68	3.77026	0.00078	219.327	11.6625	104.671	0	254.947	27.5435	207.664	18.8061	1.2743
558.4/14.8 (55418)	558.351	14.84	3.53838	0.00143	5.78768	0.307994	4.88919	0	6.92113	1.41141	5.47968	18.7915	1.27396
701.3/4.7 (68667)	701.348	4.67	3.56955	0.00132	25.763	1.37322	14.5128	0	31.5253	3.77297	24.3898	18.7611	1.27326
754.3/1.2 (72018)	754.3	1.17	3.48267	0.00165	32.566	1.75789	20.6886	0	39.5381	8.05568	30.8081	18.5256	1.26777
758.4/3.9 (72228)	758.351	3.86	3.63565	0.00111	6.82398	0.371568	5.82271	0	7.88696	1.70274	6.45241	18.3654	1.264
300.1/4.8 (19444)	300.115	4.8	2.78398	0.00952	6.76782	0.370196	0	0	10.6712	1.01383	6.39763	18.2817	1.26202
658.0/5.3 (65339)	657.988	5.25	3.98491	0.00044	87.1531	4.78064	75.6286	0	90.6751	21.9077	82.3725	18.2304	1.2608
506.2/2.7 (48611)	506.223	2.68	3.41933	0.00194	40.0286	2.22703	17.2341	0	51.1076	5.76008	37.8016	17.974	1.25465
215.1/3.1 (12210)	215.137	3.12	4.5338	9.9098e-05	57.0936	3.22986	91.348	0	54.8442	6.46171	53.8638	17.6768	1.2474
261.1/3.7 (15824)	261.143	3.67	6.32342	7.6996e-07	725.315	41.231	656.858	0	482.704	100.116	684.084	17.5915	1.2453
532.3/13.8 (52198)	532.339	13.84	5.19371	1.6333e-05	20.5728	1.17109	22.3227	0	15.3526	5.3666	19.4017	17.5673	1.2447
530.3/13.8 (51948)	530.318	13.84	7.02714	1.212e-07	61.1006	3.47828	77.5048	0	36.2944	8.13245	57.6223	17.5663	1.24468
337.3/13.7 (24408)	337.272	13.71	5.20393	1.5883e-05	40.1989	2.29691	54.3303	0	33.3508	4.79211	37.9019	17.5013	1.24307
647.1/2.7 (64412)	647.12	2.68	3.07429	0.00467	33.3255	1.9074	15.956	0	47.0408	6.00246	31.4181	17.4717	1.24234
494.3/4.4 (47114)	494.299	4.38	3.84106	0.00064	77.48	4.47072	86.7313	0	86.8077	13.1278	73.0093	17.3306	1.23881
243.1/5.0 (14265)	243.133	4.98	3.5028	0.00157	1039.07	62.1643	150.21	0	1229.71	284.872	976.903	16.7149	1.2231
413.2/6.6 (35588)	413.18	6.55	4.16667	0.00027	96.3866	5.77404	131.94	0	95.1669	23.4213	90.6125	16.6931	1.22254
144.1/3.4 (7839)	144.065	3.42	2.81987	0.00873	67.4657	4.04354	0	0	103.863	12.1066	63.4222	16.6848	1.22232
372.1/5.4 (29913)	372.134	5.39	3.7443	0.00083	36.6225	2.24623	10.8962	0	41.892	6.43922	34.3763	16.304	1.21229
722.3/1.2 (70109)	722.303	1.15	2.81192	0.0089	27.4157	1.68289	0	0	42.1425	5.31527	25.7328	16.2908	1.21194
731.0/6.4 (70644)	731.005	6.4	16.3143	7.8494e-16	218.387	13.5588	227.524	0	35.5478	29.7466	204.829	16.1067	1.20701
572.3/5.9 (56938)	572.293	5.9	4.47616	0.00012	13.5303	0.850456	14.1365	0	12.8391	2.19957	12.6798	15.9094	1.20165
340.7/4.2 (24911)	340.685	4.18	3.61182	0.00118	65.8366	4.18952	25.0061	0	77.6147	12.6424	61.647	15.7146	1.1963
314.0/1.4 (20875)	314.018	1.42	2.91754	0.00688	27.3189	1.74008	9.62966	0	40.7177	3.84339	25.5788	15.6998	1.19589
478.0/1.3 (44694)	478.007	1.33	4.22529	0.00023	19.2335	1.23292	18.2215	0	19.204	3.54393	18.0006	15.6	1.19312
351.1/6.0 (26805)	351.102	5.98	2.77887	0.00963	13.1598	0.850288	0	0	20.5686	1.95964	12.3095	15.4769	1.18968
483.1/1.2 (45450)	483.119	1.18	3.62214	0.00115	94.5444	6.13089	66.5905	0	113.063	11.9068	88.4135	15.421	1.18811
342.1/4.4 (25254)	342.13	4.38	4.18882	0.00025	6.09311	0.401534	5.064	0	5.67842	1.84006	5.69157	15.1746	1.18112
451.1/2.7 (40983)	451.1	2.75	3.28267	0.00276	78.608	5.21252	0	0	101.429	17.1458	73.3955	15.0806	1.17842
756.4/8.0 (72143)	756.411	7.97	10.1746	6.5588e-11	36.0812	2.39543	34.6994	0	14.0614	4.19382	33.6858	15.0625	1.1779
441.2/5.6 (39637)	441.221	5.58	4.08784	0.00033	136.88	9.11558	214.484	0	131.062	41.7728	127.764	15.016	1.17656
297.1/1.1 (19226)	297.14	1.11	5.77039	3.4006e-06	19.3352	1.32593	19.6221	0	13.0285	4.24432	18.0093	14.5824	1.16383
371.2/4.6 (29811)	371.192	4.62	3.50672	0.00155	228.744	15.9564	0	0	278.02	39.4671	212.788	14.3356	1.15642
760.4/6.1 (72342)	760.356	6.09	3.51229	0.00153	39.0832	2.73749	0	0	47.522	6.41445	36.3457	14.277	1.15464
476.1/5.6 (44460)	476.101	5.64	3.59173	0.00124	26.235	1.8856	15.455	0	30.9217	4.78526	24.3494	13.9134	1.14343
213.1/4.4 (11998)	213.066	4.43	3.14431	0.00392	4.26367	0.308357	2.76809	0	5.75306	0.847098	3.95531	13.8271	1.14073
271.2/4.0 (16727)	271.176	4.02	2.8152	0.00883	3.24086	0.235963	0	0	4.71154	1.08132	3.0049	13.7346	1.13782
537.1/1.0 (52663)	537.068	1.01	3.29873	0.00265	10.2053	0.747146	0	0	12.3273	3.42385	9.45814	13.659	1.13542
168.1/2.8 (9373)	168.091	2.8	3.28998	0.00271	103.191	7.58222	3.23562	0	124.913	34.7461	95.6086	13.6096	1.13384
627.3/4.3 (62754)	627.287	4.25	3.49242	0.00161	73.8062	5.4583	71.4728	0	89.767	12.4418	68.3479	13.5218	1.13104
234.1/3.5 (13640)	234.077	3.47	3.24593	0.00303	6.11663	0.465712	1.5479	0	7.78263	1.58243	5.65091	13.1339	1.11839
299.1/4.4 (19372)	299.099	4.37	3.21813	0.00325	23.7694	1.83976	0	0	31.4097	3.86506	21.9296	12.9198	1.11126
582.3/13.7 (58076)	582.293	13.72	7.9279	1.2354e-08	596.091	46.8737	645.268	7.16376	310.199	61.9666	549.217	12.717	1.10438
745.4/5.4 (71498)	745.361	5.44	2.99048	0.00575	6.39404	0.503569	3.48556	0	8.49931	2.30764	5.89047	12.6975	1.10372
443.1/1.4 (39876)	443.06	1.44	2.77534	0.00971	29.4686	2.3468	11.6395	0	44.6951	6.57652	27.1218	12.5569	1.09888
566.3/13.7 (56310)	566.32	13.72	8.45332	3.4197e-09	1437.96	115.036	1686.73	52.0412	700.357	140.76	1322.92	12.5	1.09691
483.0/2.7 (45440)	483.05	2.7	3.23474	0.00312	53.5138	4.38158	38.0596	0	68.6686	12.1924	49.1322	12.2133	1.08683
482.1/5.6 (45256)	482.118	5.64	2.94034	0.00651	5.9192	0.485142	0	0	8.30727	1.58757	5.43406	12.201	1.08639
640.2/7.8 (63803)	640.173	7.83	4.44136	0.00013	32.7718	2.69728	16.9723	0	30.2381	6.21959	30.0745	12.1499	1.08457
699.4/5.6 (68520)	699.405	5.57	3.50044	0.00157	115.889	9.64773	79.554	0	134.121	30.486	106.242	12.0121	1.07962
513.8/5.0 (49689)	513.803	4.97	3.84422	0.00064	135.035	11.3871	127.04	0	137.375	39.7011	123.648	11.8586	1.07403
180.1/4.7 (10043)	180.101	4.65	2.99601	0.00567	67.8707	5.75334	0	0	87.9822	26.3651	62.1173	11.7967	1.07176
358.2/6.6 (28012)	358.181	6.61	4.49608	0.00011	34.7461	2.99943	34.9699	0	29.8627	9.11201	31.7467	11.5842	1.06387
502.3/14.6 (48150)	502.322	14.64	3.01829	0.00537	58.5448	5.0555	0	0	79.1483	16.255	53.4893	11.5804	1.06372
560.3/14.3 (55636)	560.309	14.32	8.84936	1.3303e-09	887.04	77.7761	1026.52	62.4035	418.957	59.5874	809.264	11.405	1.0571
304.1/2.9 (19875)	304.149	2.95	3.12042	0.00416	22.8202	2.01703	11.6945	0	28.0852	8.74668	20.8032	11.3138	1.05361
443.2/2.8 (39900)	443.166	2.76	4.87787	3.8729e-05	40.3338	3.57498	43.1026	0	32.4284	8.95759	36.7589	11.2823	1.0524
524.1/1.4 (51046)	524.052	1.43	3.84627	0.00063	31.1108	2.81829	29.2087	0	30.6278	10.0998	28.2925	11.0389	1.04293
553.2/5.4 (54719)	553.228	5.39	2.78462	0.0095	167.681	15.2487	30.1665	0	233.902	67.4205	152.432	10.9964	1.04125
371.2/4.8 (29820)	371.216	4.85	3.19996	0.00341	56.5839	5.15546	13.5568	0	72.6329	12.96	51.4285	10.9755	1.04043
299.1/1.0 (19363)	299.084	1.05	6.87154	1.8158e-07	101.852	9.28167	86.1696	0	59.7258	13.1842	92.5708	10.9735	1.04035
278.1/4.4 (17328)	278.121	4.36	3.44007	0.00184	22.2568	2.0304	15.3176	0	26.9179	3.88326	20.2264	10.9618	1.03988
281.1/3.8 (17681)	281.112	3.75	3.77087	0.00077	80.5299	7.35148	58.0074	0	85.4825	19.9682	73.1785	10.9542	1.03958
786.4/1.1 (73722)	786.37	1.12	3.1464	0.0039	32.1187	2.94094	14.4009	0	40.5	10.1186	29.1778	10.9212	1.03827
594.3/6.1 (59350)	594.323	6.1	5.00992	2.6991e-05	115.2	10.549	92.2371	0	88.8619	26.2668	104.651	10.9205	1.03824
284.1/5.9 (18006)	284.139	5.91	3.04364	0.00504	30.4505	2.80413	0	0	37.5029	12.8501	27.6464	10.8592	1.0358
392.2/2.8 (32702)	392.181	2.8	3.27328	0.00283	52.1875	4.86961	55.1891	0	60.7451	19.1605	47.3179	10.717	1.03007
764.4/1.1 (72612)	764.368	1.14	5.38158	9.7808e-06	56.8627	5.35373	62.1274	0	39.1702	13.9386	51.5089	10.6211	1.02617
397.2/5.3 (33376)	397.207	5.31	3.80158	0.00071	21.1425	2.01435	17.4274	0	22.1212	5.24963	19.1281	10.4959	1.02102
197.1/4.5 (10992)	197.125	4.46	2.94594	0.00642	6.95178	0.664298	0	0	8.79055	3.0442	6.28748	10.4649	1.01973
255.1/1.1 (15314)	255.133	1.1	4.0942	0.00033	41.5199	3.99756	41.5488	0	40.2421	9.646	37.5223	10.3863	1.01646
536.2/1.1 (52570)	536.229	1.13	3.52665	0.00147	134.522	12.978	194.228	0	131.713	59.4729	121.544	10.3654	1.01558
690.3/6.5 (67905)	690.341	6.47	3.86681	0.0006	42.9131	4.15357	50.159	0	45.924	6.5246	38.7595	10.3316	1.01417
421.8/4.4 (36790)	421.752	4.43	3.6015	0.00121	122.323	11.8531	82.2115	0	131.204	37.583	110.47	10.3199	1.01367
301.1/1.1 (19574)	301.128	1.13	11.1325	8.5623e-12	94.847	9.23983	94.2547	0	21.6344	18.2849	85.6071	10.265	1.01136
249.1/3.8 (14802)	249.123	3.82	3.28028	0.00278	14.995	1.46117	11.9637	0	17.586	5.14097	13.5338	10.2623	1.01125
622.3/7.9 (62319)	622.309	7.87	7.15296	8.7583e-08	34.2096	3.34765	35.3255	0	18.3614	5.41598	30.8619	10.219	1.00941
421.1/3.0 (36683)	421.134	2.97	3.91769	0.00052	13.6348	1.33471	12.8033	0	12.9238	4.48677	12.3001	10.2156	1.00926
412.1/1.4 (35421)	412.056	1.38	3.34084	0.00238	66.3766	6.53821	46.5167	0	82.5399	10.2178	59.8384	10.1521	1.00656
494.3/13.5 (47117)	494.322	13.45	2.92027	0.00684	455.638	45.1661	271.196	0	624.61	134.914	410.472	10.088	1.00381
544.3/13.7 (53608)	544.339	13.72	7.46436	3.9512e-08	7445.03	739.089	8288.59	161.157	3536.55	1454.6	6705.94	10.0733	1.00317
333.1/2.7 (23561)	333.104	2.73	2.90605	0.00708	8.0022	0.794855	0	0	10.7313	2.86129	7.20734	10.0675	1.00292
148.1/1.4 (8157)	148.097	1.4	3.91517	0.00053	7.97826	0.795096	7.77416	0	8.30143	1.45732	7.18317	10.0343	1.00149
265.2/6.0 (16219)	265.154	5.95	3.9432	0.00049	42.1125	4.20424	55.3521	0	41.3012	11.5255	37.9083	10.0167	1.00072
425.1/1.1 (37265)	425.109	1.15	7.66745	2.3662e-08	111.755	11.2681	118.394	0	46.8313	25.2515	100.487	9.91785	0.996418
138.1/3.0 (7533)	138.055	3.03	3.27383	0.00282	77.245	7.80104	0	0	93.9304	20.9601	69.4439	9.90187	0.995717
424.2/5.3 (37138)	424.153	5.33	3.11517	0.00422	127.567	12.926	81.0525	0	161.675	38.5949	114.641	9.86905	0.994275
288.1/4.4 (18384)	288.134	4.44	2.89499	0.00727	35.3152	3.58962	0	0	45.8763	14.744	31.7256	9.83813	0.992913
478.2/3.0 (44742)	478.241	2.98	3.29683	0.00266	12.8657	1.32013	9.33502	0	15.5229	3.43293	11.5455	9.74572	0.988814
168.1/3.5 (9351)	168.061	3.48	3.35197	0.00231	8.6121	0.89103	7.80744	0	8.67826	4.08321	7.72107	9.66533	0.985217
612.4/4.5 (61260)	612.408	4.52	3.00599	0.00553	34.2145	3.54627	18.6376	0	45.5857	9.31859	30.6682	9.64802	0.984438
385.2/3.4 (31681)	385.194	3.44	3.27962	0.00278	7.45767	0.773869	0	0	9.06023	1.94872	6.6838	9.63687	0.983936
544.3/14.3 (53603)	544.336	14.32	9.09415	7.4985e-10	2328.56	245.201	2608.97	292.848	1006.38	240.348	2083.36	9.49654	0.977565
407.2/4.9 (34770)	407.239	4.9	3.1944	0.00345	293.147	30.9039	251.788	0	313.795	141.62	262.243	9.48577	0.977072
338.2/4.9 (24536)	338.178	4.86	3.17927	0.00359	15.9343	1.68147	6.7659	0	19.2079	5.44841	14.2528	9.47639	0.976643
657.2/8.5 (65238)	657.233	8.46	3.73528	0.00085	181.227	19.1832	261.498	0	178.67	61.8871	162.044	9.44717	0.975302
439.2/2.9 (39295)	439.181	2.89	2.78996	0.00938	11.3565	1.20936	0	0	16.3602	3.09958	10.1471	9.39048	0.972688
753.4/6.0 (71983)	753.413	6.04	3.49886	0.00158	66.3531	7.1657	84.1645	0	67.1448	26.8429	59.1874	9.25981	0.966602
342.2/4.8 (25346)	342.225	4.79	2.88184	0.00751	56.5061	6.1057	0	0	70.6385	26.4917	50.4004	9.25465	0.96636
607.3/1.2 (60708)	607.269	1.16	3.06032	0.00484	60.5825	6.569	0	0	75.518	21.5943	54.0135	9.22248	0.964848
385.7/4.2 (31783)	385.726	4.2	4.00249	0.00042	96.4223	10.468	94.7727	0	95.4134	20.6435	85.9543	9.21118	0.964315
261.1/3.4 (15833)	261.144	3.4	4.14316	0.00029	426.131	46.6418	375.119	0	402.398	96.051	379.49	9.13626	0.960769
522.4/14.3 (50871)	522.354	14.32	8.8363	1.3719e-09	18072.6	1984.74	20708.6	1612.54	8091.19	1746.31	16087.9	9.10579	0.959318
373.2/1.1 (30131)	373.243	1.12	12.921	2.5523e-13	3109.39	345.814	2970.48	0	416.158	578.101	2763.58	8.99153	0.953834
311.2/3.7 (20610)	311.166	3.69	3.02656	0.00526	2.93581	0.3276	0	0	3.6646	1.08558	2.60821	8.96155	0.952383
638.3/1.1 (63678)	638.299	1.14	5.19054	1.6475e-05	101.03	11.2876	118.659	0	62.3193	32.9104	89.7424	8.9505	0.951847
415.2/4.5 (35911)	415.183	4.46	3.31561	0.00254	126.794	14.187	0	0	151.521	31.4653	112.607	8.93731	0.951207
756.4/5.7 (72151)	756.423	5.66	5.36488	1.0237e-05	26.2881	2.95555	20.426	0	15.586	8.34626	23.3325	8.89447	0.94912
536.4/14.8 (52632)	536.368	14.84	5.91494	2.3012e-06	122.78	13.8854	141.182	3.27443	75.8902	26.1852	108.895	8.8424	0.94657
418.7/3.3 (36420)	418.691	3.31	2.87258	0.00768	68.7712	7.8278	0	0	92.0358	24.1175	60.9434	8.78551	0.943767
433.2/1.2 (38476)	433.191	1.15	3.82041	0.00068	135.742	15.5873	179.077	0	106.535	64.6876	120.155	8.70853	0.939945
245.1/4.2 (14438)	245.091	4.2	3.31304	0.00255	20.1577	2.33587	12.2338	0	24.4392	4.03898	17.8219	8.62963	0.935992
520.2/2.7 (50565)	520.238	2.69	3.0552	0.0049	50.6161	5.87595	9.14509	0	58.8195	22.528	44.7401	8.61411	0.93521
451.9/1.3 (41130)	451.947	1.27	3.38614	0.00212	13.2861	1.54707	10.7684	0	14.3102	4.90826	11.739	8.58793	0.933888
318.1/5.6 (21369)	318.135	5.59	2.78165	0.00957	5.55952	0.64958	2.62773	0	7.00977	2.79737	4.90994	8.55865	0.932405
429.1/2.7 (37854)	429.13	2.67	2.78487	0.00949	6.83321	0.803033	0	0	9.34264	2.53772	6.03017	8.50925	0.929891
497.1/1.6 (47431)	497.079	1.58	3.23395	0.00312	69.4061	8.27996	0	0	82.5444	20.6309	61.1262	8.38242	0.923369
163.1/4.8 (9053)	163.058	4.78	3.07945	0.00461	14.6354	1.75254	0	0	18.0326	4.92895	12.8828	8.35096	0.921736
433.2/3.9 (38503)	433.219	3.95	3.22927	0.00316	179.106	21.8125	21.5957	0	208.652	59.2573	157.293	8.21115	0.914404
343.2/4.6 (25494)	343.199	4.56	3.4947	0.0016	8.01727	0.984656	8.3359	0	8.51353	2.59335	7.03261	8.1422	0.910742
691.3/1.1 (67966)	691.323	1.13	4.57964	8.7457e-05	123.572	15.2548	145.35	0	96.9368	34.2826	108.317	8.10051	0.908512
483.1/3.0 (45451)	483.12	2.96	6.95299	1.469e-07	545.916	67.6803	512.456	0	285.788	95.1648	478.235	8.0661	0.906664
471.3/3.8 (43878)	471.259	3.83	3.50291	0.00156	12.1035	1.50122	12.4384	0	12.7029	4.03173	10.6023	8.06248	0.906469
297.0/1.4 (19188)	297.038	1.44	3.8477	0.00063	102.065	12.6831	79.2411	0	104.659	19.4455	89.3816	8.0473	0.90565
764.1/3.3 (72584)	764.147	3.33	2.87005	0.00773	32.3105	4.10815	0	0	40.3476	14.1589	28.2023	7.86496	0.895697
542.3/13.3 (53346)	542.322	13.33	6.55227	4.1968e-07	107.16	13.6603	91.942	6.2317	61.0627	17.4514	93.5	7.84468	0.894575
316.1/1.0 (21091)	316.096	1.01	4.07596	0.00034	25.6061	3.26838	27.7011	0	21.3572	9.08017	22.3377	7.83449	0.894011
341.1/2.8 (25085)	341.141	2.8	3.70339	0.00093	55.5117	7.11275	81.7899	0	53.4483	19.0714	48.399	7.80454	0.892347
277.1/1.1 (17221)	277.102	1.06	10.2366	5.729e-11	304.173	39.0454	260.16	39.4062	111.506	30.7092	265.128	7.79024	0.891551
240.1/1.1 (14051)	240.095	1.13	9.81856	1.4397e-10	91.7566	11.788	97.6083	0	24.9123	18.3528	79.9685	7.78388	0.891196
716.3/4.7 (69693)	716.339	4.74	3.04862	0.00498	78.8977	10.1531	0	0	93.7349	31.149	68.7445	7.77076	0.890464
229.1/1.0 (13247)	229.147	1.02	3.01401	0.00543	23.2817	3.00282	0	0	27.7898	9.50591	20.2789	7.75327	0.889485
489.1/1.4 (46334)	489.065	1.44	2.85214	0.00807	76.8006	9.95259	10.5049	0	105.985	18.7612	66.848	7.71665	0.887429
526.2/1.1 (51319)	526.213	1.12	6.01694	1.7486e-06	147.843	19.4473	149.216	0	28.9264	60.6757	128.396	7.60226	0.880943
778.4/1.1 (73366)	778.361	1.14	3.02198	0.00532	45.6212	6.0056	0	0	57.0056	14.6923	39.6156	7.59644	0.88061
588.3/3.6 (58697)	588.281	3.61	2.92325	0.00679	24.2937	3.20248	0	0	30.0094	9.94514	21.0912	7.58588	0.880006
524.2/1.1 (51085)	524.239	1.13	3.47231	0.00169	118.143	15.5753	178.352	0	114.745	49.2878	102.568	7.58528	0.879972
204.0/2.6 (11471)	204.03	2.6	2.81057	0.00892	8.19752	1.09164	3.72134	0	10.4049	3.6158	7.10588	7.50939	0.875605
301.1/4.0 (19579)	301.131	3.97	2.91368	0.00695	14.4571	1.9258	0	0	19.5807	3.12812	12.5313	7.50707	0.87547
478.1/1.4 (44701)	478.113	1.42	3.36699	0.00222	97.8253	13.0535	48.677	0	112.909	22.1724	84.7718	7.49418	0.874724
152.1/1.2 (8373)	152.053	1.24	3.22488	0.0032	25.2293	3.39202	23.488	0	28.6864	8.67539	21.8373	7.43786	0.871448
173.0/1.1 (9593)	173.041	1.06	5.36397	1.0262e-05	7.32544	0.987541	7.71787	0	3.62883	2.65448	6.3379	7.41786	0.870278
524.3/4.4 (51104)	524.259	4.38	3.21836	0.00325	16.4818	2.23048	14.3396	0	17.5033	7.09934	14.2513	7.38936	0.868607
390.2/4.5 (32423)	390.167	4.49	3.09224	0.00447	220.769	30.0172	262.914	0	234.34	107.688	190.751	7.35473	0.866567
413.2/2.9 (35576)	413.164	2.93	4.75406	5.4326e-05	40.5015	5.50962	43.3697	0	26.7701	13.8266	34.9918	7.35105	0.866349
291.1/5.9 (18698)	291.133	5.88	2.91228	0.00697	44.0692	5.99936	40.1214	0	49.9726	22.5449	38.0699	7.34565	0.86603
712.4/6.3 (69453)	712.385	6.31	3.5525	0.00137	80.8682	11.1298	90.746	0	78.2792	30.7877	69.7383	7.2659	0.861289
647.3/1.2 (64433)	647.298	1.16	5.62384	5.0593e-06	262.363	36.2411	316.452	0	155.933	67.3278	226.122	7.23938	0.859702
597.2/6.6 (59606)	597.221	6.57	5.34475	1.0814e-05	89.4167	12.3579	99.9938	0	51.4578	27.8252	77.0588	7.2356	0.859475
481.2/6.0 (45151)	481.211	5.95	2.79953	0.00917	281.707	38.9978	297.994	0	299.105	174.666	242.71	7.22367	0.858758
567.8/3.9 (56450)	567.759	3.94	3.00719	0.00552	6.16577	0.858145	3.40082	0	7.05224	2.75352	5.30762	7.18499	0.856426
286.0/1.5 (18172)	286.022	1.46	3.59328	0.00124	87.8051	12.403	69.6925	0	94.9595	16.6384	75.4021	7.07935	0.849994
719.4/1.1 (69913)	719.351	1.13	5.595	5.4715e-06	153.649	21.7866	165.243	0	86.5505	43.6188	131.862	7.05243	0.848339
573.3/6.1 (57040)	573.266	6.08	3.78466	0.00075	346.781	49.4264	83.5756	38.7707	361.607	46.2821	297.355	7.01612	0.846097
278.1/3.6 (17305)	278.101	3.6	2.80134	0.00913	16.9931	2.42588	11.191	0	22.2992	6.29279	14.5673	7.00495	0.845405
426.9/1.3 (37530)	426.927	1.3	2.98421	0.00584	11.9091	1.71005	0	0	14.9763	3.64772	10.1991	6.96419	0.842871
318.3/12.8 (21438)	318.299	12.84	6.94955	1.4822e-07	111.197	15.9744	102.439	0	46.1573	28.3494	95.2221	6.96091	0.842666
476.2/2.8 (44492)	476.231	2.79	3.48119	0.00166	27.8843	4.0258	22.7612	0	27.6588	10.4058	23.8585	6.92639	0.840507
510.3/4.5 (49267)	510.252	4.51	3.31978	0.00251	34.9425	5.0516	13.9499	0	38.4541	11.1152	29.8909	6.91712	0.839925
772.4/5.8 (73037)	772.422	5.79	2.8347	0.00842	96.7063	14.0181	124.441	0	97.2737	60.9915	82.6882	6.89867	0.838766
265.3/14.9 (16246)	265.251	14.95	3.25732	0.00294	85.0317	12.328	77.15	0	99.7954	20.2573	72.7037	6.89743	0.838687
734.3/1.1 (70868)	734.328	1.14	4.45185	0.00012	110.912	16.1004	129.385	0	81.3006	36.831	94.8114	6.88878	0.838142
343.2/3.8 (25456)	343.171	3.83	2.89965	0.00719	35.0528	5.16335	2.97253	0	42.7444	14.3641	29.8894	6.78877	0.831791
597.3/5.7 (59639)	597.288	5.67	3.36848	0.00222	21.6791	3.20363	8.92773	0	23.2945	6.94827	18.4754	6.76702	0.830398
339.2/14.9 (24751)	339.219	14.93	3.82947	0.00066	20.3805	3.01535	12.8785	0	17.8716	7.32159	17.3651	6.75892	0.829877
245.1/1.4 (14427)	245.077	1.39	3.04005	0.00509	5.91186	0.883813	1.77115	0	7.15146	1.91564	5.02804	6.68903	0.825363
209.1/1.1 (11745)	209.055	1.13	5.31662	1.1676e-05	8.94615	1.33813	5.83864	0	4.34532	3.24164	7.60802	6.68555	0.825137
580.3/4.5 (57856)	580.259	4.46	3.40998	0.00199	58.8213	8.82643	75.422	0	57.4817	23.9634	49.9948	6.66422	0.823749
716.3/4.6 (69700)	716.348	4.62	3.51347	0.00152	57.1621	8.63642	77.3677	0	53.8886	22.822	48.5257	6.61873	0.820775
168.0/1.4 (9342)	167.996	1.44	2.94629	0.00641	63.8933	9.66469	32.019	2.79708	83.2013	14.798	54.2286	6.611	0.820267
472.2/1.1 (43971)	472.23	1.12	4.46739	0.00012	342.576	52.0992	342.591	0	232.639	125.063	290.476	6.57545	0.817925
236.2/13.7 (13784)	236.165	13.73	3.23441	0.00312	7.62035	1.16436	7.01793	0	7.64885	3.4261	6.45599	6.54467	0.815888
546.3/1.1 (53857)	546.309	1.14	2.7677	0.00989	139.638	21.4865	0	0	167.208	69.9277	118.151	6.49884	0.812836
281.1/3.7 (17706)	281.149	3.73	3.69537	0.00095	7.06872	1.09871	6.27122	0	6.91024	1.97971	5.97001	6.43366	0.808458
339.3/14.3 (24770)	339.287	14.31	5.7003	4.1115e-06	74.2569	11.6776	63.9459	0	44.2357	16.7417	62.5793	6.35894	0.803385
733.4/1.1 (70818)	733.356	1.13	4.93889	3.2777e-05	142.165	22.3794	162.704	0	74.625	54.4121	119.786	6.35251	0.802945
356.1/4.9 (27696)	356.12	4.92	3.15311	0.00383	81.6221	12.9165	57.223	0	93.4503	26.3537	68.7056	6.31922	0.800663
545.8/4.8 (53775)	545.771	4.78	3.40501	0.00202	60.9671	9.70689	42.9212	0	62.9626	20.3272	51.2602	6.28081	0.798016
426.1/1.4 (37411)	426.081	1.44	3.20072	0.0034	169.354	26.9873	63.5818	0	194.689	47.8349	142.366	6.27531	0.797635
394.2/4.7 (32957)	394.159	4.73	3.48624	0.00163	66.5444	10.6077	73.4837	0	55.3017	32.3623	55.9366	6.27319	0.797488
524.3/6.0 (51111)	524.271	6.01	4.50908	0.00011	12.5236	2.0057	14.5429	0	8.78017	4.14171	10.5179	6.24402	0.795464
344.7/3.4 (25719)	344.686	3.39	3.01862	0.00536	6.42682	1.03027	3.02459	0	7.30044	2.62117	5.39654	6.23797	0.795043
478.3/13.7 (44777)	478.292	13.71	6.75121	2.4868e-07	434.953	70.3227	458.681	55.4585	227.24	71.2265	364.631	6.18511	0.791347
575.3/1.2 (57322)	575.307	1.17	5.90461	2.3663e-06	360.526	58.4226	362.975	0	56.8871	147.628	302.103	6.171	0.790355
775.4/1.1 (73213)	775.361	1.13	3.31324	0.00255	78.9949	12.8077	107.851	0	77.3001	33.6098	66.1871	6.16774	0.790126
221.1/2.9 (12629)	221.093	2.86	2.91294	0.00696	96.5073	15.7189	0	0	116.427	36.9079	80.7884	6.13955	0.788137
428.2/6.1 (37744)	428.216	6.15	2.88626	0.00743	77.7703	12.6897	35.3159	0	87.5243	37.6849	65.0806	6.12861	0.787362
512.2/1.1 (49496)	512.222	1.14	3.46956	0.00171	145.523	23.8	199.041	0	113.968	75.2362	121.723	6.11442	0.786355
513.2/5.7 (49626)	513.247	5.66	2.95794	0.00623	29.0572	4.79356	26.6526	0	32.0213	13.5398	24.2636	6.06171	0.782595
540.2/1.2 (53058)	540.24	1.15	3.72224	0.00088	121.515	20.0626	164.025	0	95.4077	53.9553	101.453	6.05681	0.782244
573.3/4.7 (57077)	573.326	4.75	3.36649	0.00223	111.432	18.4324	89.3867	0	107.271	46.1314	92.9997	6.04546	0.781429
652.3/1.1 (64817)	652.3	1.14	5.28524	1.2721e-05	111.415	18.46	142.468	0	59.1256	36.4684	92.9554	6.0355	0.780713
482.2/1.1 (45298)	482.204	1.14	3.02335	0.0053	137.127	22.7744	169.378	0	134.718	73.2005	114.353	6.02112	0.779677
465.2/13.9 (43021)	465.243	13.92	8.31978	4.7236e-09	267.778	44.5483	249.871	40.9254	104.644	44.3793	223.23	6.01096	0.778944
275.1/5.2 (17132)	275.139	5.2	3.26995	0.00285	57.1603	9.69331	69.6157	0	56.6635	23.963	47.467	5.89688	0.770622
520.3/13.7 (50625)	520.339	13.72	8.00031	1.0328e-08	3759.47	639.606	4079.36	470.987	1488.93	674.194	3119.86	5.87779	0.769214
736.3/1.2 (70986)	736.318	1.17	3.08269	0.00457	35.3504	6.04359	28.5533	0	37.7433	15.0776	29.3068	5.84923	0.767099
569.3/3.8 (56610)	569.281	3.82	4.74808	5.5221e-05	32.8766	5.71612	35.7116	0	17.5096	12.8831	27.1605	5.75156	0.759786
384.7/3.5 (31607)	384.691	3.5	2.83557	0.0084	23.1502	4.02726	0	0	28.5326	8.68883	19.1229	5.74838	0.759545
367.1/1.1 (29201)	367.12	1.14	3.04764	0.00499	49.604	8.63493	39.1215	0	49.7916	24.5394	40.969	5.74457	0.759258
583.3/13.2 (58157)	583.258	13.23	4.13043	0.0003	30.5365	5.36595	21.2329	0	24.5337	9.31544	25.1705	5.69078	0.755172
400.1/5.3 (33757)	400.149	5.32	4.74483	5.5713e-05	20.3868	3.64377	23.5589	0	10.0601	8.32716	16.743	5.59498	0.747799
419.2/6.4 (36508)	419.227	6.42	3.76711	0.00078	14.1893	2.55186	20.0621	0	11.4077	5.6672	11.6374	5.56038	0.745104
310.1/1.1 (20497)	310.126	1.13	5.54562	6.2574e-06	348.699	62.8941	392.214	0	120.387	132.775	285.804	5.54422	0.74384
318.1/1.2 (21362)	318.12	1.2	6.90146	1.6797e-07	121.692	21.9547	117.919	0	23.3283	40.3036	99.7376	5.54288	0.743735
435.3/6.4 (38804)	435.259	6.37	5.74322	3.6602e-06	37.112	6.71874	42.8305	0	19.8179	9.48207	30.3933	5.52366	0.742227
415.1/1.5 (35878)	415.065	1.45	3.44715	0.00181	104.271	18.9035	74.5256	0	106.885	28.9736	85.3678	5.51598	0.741622
687.4/1.1 (67686)	687.354	1.09	4.57312	8.9025e-05	148.812	27.0829	151.247	0	79.8841	60.8008	121.729	5.49469	0.739944
655.3/7.7 (65057)	655.251	7.67	4.53629	9.8429e-05	39.177	7.30248	45.9347	0	23.9667	14.3424	31.8745	5.36489	0.729561
606.3/8.3 (60635)	606.33	8.34	5.55739	6.0603e-06	55.564	10.4798	61.7957	0	23.4972	18.9636	45.0842	5.302	0.72444
767.4/1.2 (72781)	767.357	1.16	3.79764	0.00072	35.2712	6.67869	34.1876	0	27.3051	14.2037	28.5925	5.28116	0.722729
508.3/13.8 (49001)	508.338	13.84	6.12041	1.3244e-06	353.503	66.9549	421.083	56.9263	170.562	87.73	286.548	5.27972	0.722611
357.1/7.4 (27850)	357.142	7.39	7.71672	2.0911e-08	30.823	5.86645	32.6971	0	8.53348	7.94501	24.9566	5.25412	0.7205
753.4/1.1 (71965)	753.353	1.13	3.17394	0.00364	41.2637	7.92924	48.2376	0	38.9316	19.147	33.3345	5.20399	0.716337
667.3/1.1 (66169)	667.307	1.14	3.17364	0.00364	65.8426	12.7282	66.4992	0	57.8323	33.6545	53.1144	5.17298	0.713741
657.2/11.2 (65237)	657.232	11.18	2.78909	0.0094	2623.93	509.006	0	0	3163.59	1033.51	2114.92	5.15501	0.712229
417.1/1.0 (36221)	417.148	1.05	3.09168	0.00447	25.2653	4.90703	25.075	0	25.3595	11.1892	20.3583	5.14879	0.711706
497.2/3.1 (47467)	497.202	3.08	2.76834	0.00988	213.858	41.5722	50.8813	0	261.459	82.5619	172.286	5.14425	0.711322
585.3/4.6 (58386)	585.322	4.6	2.77777	0.00966	24.3904	4.75086	13.6526	0	26.6674	12.5075	19.6396	5.1339	0.710447
351.2/2.7 (26862)	351.175	2.68	3.13617	0.004	72.019	14.2587	100.296	0	57.0967	41.0823	57.7604	5.05089	0.703368
559.3/1.1 (55496)	559.293	1.13	3.78621	0.00074	216.941	43.0174	255.527	0	128.338	109.65	173.924	5.04311	0.702698
268.1/4.1 (16484)	268.129	4.1	2.99319	0.00571	14.3029	2.84337	8.36711	0	16.3518	4.72523	11.4595	5.03024	0.701589
522.7/5.0 (50885)	522.738	5.01	2.85288	0.00806	16.1087	3.21164	11.2409	0	16.5675	8.39408	12.8971	5.01573	0.700334
154.0/4.2 (8433)	153.995	4.2	3.14583	0.0039	37.0598	7.49271	51.4183	0	36.4336	15.7536	29.5671	4.94611	0.694264
371.2/4.1 (29841)	371.23	4.08	3.65562	0.00105	80.3248	16.3723	72.8669	0	70.6044	26.5589	63.9525	4.90614	0.69074
502.3/13.7 (48140)	502.291	13.71	4.43165	0.00013	67.8083	13.9641	83.8741	3.62049	47.5304	19.9589	53.8442	4.85591	0.686271
772.3/1.1 (73015)	772.336	1.12	2.84323	0.00825	59.0828	12.2889	62.4708	0	59.6237	31.0972	46.7938	4.80781	0.681947
331.2/2.7 (23293)	331.165	2.68	3.25885	0.00293	24.1527	5.06288	17.5062	0	21.6274	10.7496	19.0898	4.77055	0.678568
676.3/1.1 (66825)	676.329	1.14	3.99617	0.00042	182.192	38.4347	246.643	0	114.059	78.8056	143.757	4.7403	0.675806
304.1/3.6 (19874)	304.148	3.63	3.5341	0.00144	33.5536	7.07996	34.6362	0	27.6434	13.7572	26.4737	4.73924	0.675708
690.3/1.2 (67895)	690.327	1.15	3.74037	0.00084	147.588	31.1545	151.192	0	95.6963	69.8818	116.433	4.73728	0.675529
717.4/4.3 (69794)	717.378	4.28	3.02942	0.00522	44.8164	9.66894	48.4403	0	36.864	25.3702	35.1474	4.63508	0.666057
788.4/1.1 (73846)	788.402	1.14	4.42426	0.00013	151.727	32.909	161.331	0	69.0517	66.7397	118.818	4.61052	0.66375
517.2/7.4 (50185)	517.184	7.35	5.08153	2.2192e-05	53.8324	11.7445	62.3821	0	32.5567	13.4565	42.0878	4.58361	0.661208
745.4/1.2 (71508)	745.377	1.16	3.1917	0.00348	86.5669	19.05	54.0611	0	69.9388	44.6125	67.5169	4.5442	0.657457
759.4/4.9 (72303)	759.388	4.86	3.13208	0.00404	116.194	25.9974	158.399	0	89.6428	64.0318	90.1962	4.46944	0.650253
510.4/14.4 (49303)	510.353	14.44	4.43762	0.00013	83.8119	18.8029	93.1459	0	43.1062	33.9057	65.009	4.4574	0.649082
588.3/4.8 (58701)	588.286	4.8	3.72143	0.00088	287.837	64.8803	337.048	0	171.397	141.095	222.957	4.43643	0.647034
627.3/1.1 (62746)	627.275	1.14	5.68564	4.2783e-06	160.152	36.3836	170.806	0	66.2937	49.2101	123.769	4.40178	0.643628
424.2/7.2 (37137)	424.153	7.19	2.80981	0.00894	502.772	114.895	639.652	0	470.594	281.941	387.877	4.37593	0.641071
268.0/1.7 (16444)	268.015	1.66	4.3131	0.00018	108.429	24.8031	84.4027	21.756	82.4036	24.4845	83.6254	4.37158	0.640638
153.0/1.2 (8396)	153.04	1.19	3.53353	0.00144	15.0885	3.45675	16.3564	0	12.355	5.87505	11.6318	4.36495	0.639979
460.7/3.8 (42412)	460.729	3.8	3.03324	0.00517	17.8951	4.1486	21.3097	0	14.0809	10.0917	13.7465	4.31353	0.634833
716.3/4.5 (69695)	716.345	4.48	3.60375	0.0012	94.7983	22.1522	114.436	0	55.8191	48.3511	72.6462	4.27941	0.631384
284.1/2.7 (17990)	284.122	2.74	3.23174	0.00314	81.9631	20.0047	111.17	3.25292	65.4061	39.1242	61.9584	4.0972	0.612487
553.3/1.1 (54740)	553.268	1.14	2.8866	0.00742	119.531	29.1859	130.233	0	97.4817	69.5616	90.3454	4.09551	0.612308
405.0/1.0 (34450)	405.024	1.04	2.84523	0.00821	54.7336	13.4906	55.4603	0	21.2654	40.8945	41.2429	4.05715	0.608221
107.0/2.8 (5912)	107.049	2.82	3.06987	0.00472	184.023	45.4174	266.626	0	145.529	97.5114	138.605	4.05181	0.607649
458.3/15.0 (42096)	458.32	15.02	3.43441	0.00187	17.4115	4.3033	20.4969	0	15.0492	6.15576	13.1082	4.04609	0.607035
614.3/1.1 (61430)	614.318	1.13	2.82546	0.00861	118.173	29.2312	174.874	0	90.2473	74.0408	88.9421	4.04272	0.606673
594.3/1.1 (59327)	594.275	1.15	4.13511	0.00029	108.711	26.9387	118.673	0	46.9202	50.6803	81.7722	4.03549	0.605896
103.1/2.8 (5804)	103.055	2.79	3.03769	0.00512	745.195	186.41	1077.92	0	588.164	400.093	558.785	3.99761	0.601801
399.1/1.6 (33578)	399.109	1.59	4.1098	0.00031	352.009	88.2155	364.037	65.9513	256.938	99.6529	263.794	3.99033	0.601009
314.1/5.5 (20914)	314.15	5.52	4.38782	0.00015	5.28174	1.33465	4.75775	0	2.73466	2.03613	3.94709	3.9574	0.59741
542.3/13.8 (53343)	542.32	13.75	6.1129	1.3514e-06	717.51	182.055	782.684	126.812	311.388	169.966	535.454	3.94116	0.595624
731.4/1.1 (70678)	731.388	1.14	2.76557	0.00994	105.672	26.8894	139.383	0	85.8724	64.868	78.7825	3.92987	0.594379
673.3/6.1 (66612)	673.326	6.12	3.06898	0.00473	55.3077	14.2182	46.7142	0	29.8644	34.9899	41.0895	3.88992	0.589941
333.1/1.1 (23541)	333.059	1.06	2.86451	0.00783	21.0304	5.41255	13.2873	0	20.7749	9.46305	15.6179	3.8855	0.589447
605.3/1.2 (60497)	605.29	1.15	3.80349	0.00071	167.857	43.3799	198.818	0	78.7956	83.4464	124.477	3.86947	0.587651
457.3/4.8 (41933)	457.268	4.79	3.62809	0.00113	1032.4	268.014	1156.22	25.3192	677.423	456.011	764.388	3.85205	0.585691
148.1/1.2 (8155)	148.095	1.15	3.03508	0.00515	17.4221	4.53543	20.8977	0	14.6492	8.55368	12.8867	3.84134	0.584483
391.2/4.9 (32553)	391.162	4.92	3.3221	0.0025	47.126	12.2871	55.7314	0	37.1844	20.4188	34.8388	3.8354	0.58381
512.3/15.9 (49529)	512.274	15.88	3.52231	0.00149	9.92571	2.59302	11.7818	0	6.35268	4.69911	7.33269	3.82785	0.582955
249.1/1.0 (14789)	249.105	1.05	7.0239	1.2222e-07	145.832	38.2708	141.151	31.7517	33.7304	40.1654	107.562	3.81054	0.580986
281.1/2.8 (17707)	281.149	2.77	4.96524	3.0498e-05	634.803	166.857	661.339	45.0753	289.831	211.514	467.946	3.80447	0.580294
431.2/3.0 (38223)	431.193	3	3.016	0.0054	1531.15	403.662	1185.72	0	1206.28	806.58	1127.49	3.79314	0.578999
480.3/14.3 (45060)	480.305	14.3	5.3995	9.3146e-06	569.956	150.548	526.135	59.7116	230.147	178.964	419.408	3.78588	0.578167
379.3/15.9 (30932)	379.287	15.92	3.45014	0.00179	54.0435	14.4223	55.2417	2.97067	37.4778	24.5225	39.6212	3.74721	0.573708
557.3/1.1 (55259)	557.288	1.14	4.12015	0.0003	193.837	51.7506	207.312	0	82.1728	88.252	142.087	3.74561	0.573522
407.2/4.5 (34766)	407.238	4.52	3.03602	0.00514	270.76	72.3234	127.091	85.176	282.362	76.0796	198.437	3.74374	0.573306
295.2/1.2 (19073)	295.157	1.23	3.4289	0.0019	131.386	35.5007	160.356	0	76.3138	67.5834	95.8851	3.70093	0.568311
666.3/1.2 (66078)	666.314	1.23	3.05068	0.00495	74.2973	20.0933	66.4506	0	57.5899	38.1812	54.204	3.69762	0.567922
369.1/1.1 (29498)	369.137	1.13	3.20094	0.0034	38.9596	10.607	52.3065	0	30.7499	17.7135	28.3527	3.67303	0.565024
344.2/4.9 (25634)	344.18	4.87	3.35778	0.00228	127.06	34.7089	154.734	0	81.9069	63.154	92.3516	3.66074	0.563569
584.3/1.1 (58257)	584.299	1.15	2.88447	0.00746	34.9937	9.59281	50.6344	0	28.3852	19.0178	25.4009	3.64791	0.562044
243.2/1.0 (14298)	243.17	1	3.45965	0.00175	24.0217	6.63634	23.7657	0	12.7375	12.5629	17.3853	3.61972	0.558675
467.1/2.8 (43223)	467.08	2.8	2.87533	0.00763	223.789	61.8279	249.678	0	186.289	118.756	161.961	3.61955	0.558655
558.3/13.7 (55393)	558.294	13.72	5.23628	1.454e-05	298.748	83.2684	334.937	66.2961	139.743	84.4083	215.48	3.58777	0.554825
588.4/8.2 (58741)	588.373	8.23	4.26474	0.00021	38.9707	10.8996	40.0323	5.2752	18.7887	15.5215	28.071	3.57541	0.553326
694.3/1.1 (68182)	694.347	1.14	4.05478	0.00036	172.154	48.4842	197.326	0	55.0578	83.6193	123.67	3.55073	0.550318
166.1/1.0 (9210)	166.052	1.01	4.4521	0.00012	101.716	28.8738	111.595	0	41.1736	41.0239	72.8424	3.52279	0.546887
470.8/5.5 (43783)	470.777	5.5	2.81865	0.00875	21.7039	6.21994	28.9948	0	16.9694	12.2874	15.484	3.48941	0.542752
359.3/1.1 (28221)	359.265	1.14	2.91638	0.0069	85.2733	24.5057	86.7967	0	26.1787	59.6258	60.7677	3.47974	0.541547
281.1/1.1 (17705)	281.148	1.1	5.5193	6.7217e-06	635.547	188.445	559.197	123.259	186.472	209.689	447.102	3.37258	0.527962
701.3/1.1 (68662)	701.342	1.13	2.92067	0.00683	135.594	40.2528	171.813	0	108.078	68.7486	95.3414	3.36856	0.527445
536.3/6.5 (52612)	536.306	6.48	3.98991	0.00043	110.834	33.4279	138.681	0	63.7167	41.1795	77.4063	3.31562	0.520565
573.3/1.2 (57047)	573.28	1.15	3.25971	0.00293	178.313	53.8885	207.403	0	114.448	87.243	124.425	3.30893	0.519688
405.2/3.9 (34508)	405.215	3.89	2.82712	0.00858	101.985	31.2829	114.63	0	72.9499	58.2035	70.7025	3.2601	0.513231
373.0/1.6 (30037)	372.975	1.58	3.07049	0.00471	72.4123	22.5193	86.1121	0	59.0958	30.5267	49.893	3.21557	0.507258
712.3/1.1 (69435)	712.319	1.11	5.62869	4.9931e-06	244.451	76.1349	253.427	44.3331	56.7152	81.2416	168.316	3.21076	0.506607
478.1/3.6 (44708)	478.134	3.63	4.77634	5.1117e-05	355.298	111.663	290.095	117.03	170.994	106.081	243.635	3.18188	0.502684
406.2/5.0 (34579)	406.16	4.99	4.2734	0.0002	329.56	103.708	314.229	0	65.3735	151.415	225.852	3.17777	0.502123
376.2/7.9 (30510)	376.183	7.86	4.01355	0.00041	85.155	26.9548	83.9592	0	40.2714	34.7265	58.2002	3.15918	0.499575
792.4/4.1 (74092)	792.354	4.07	2.78416	0.00951	15.3797	4.87794	13.1916	0	12.3535	8.02773	10.5017	3.1529	0.498711
229.1/3.1 (13198)	229.117	3.14	3.13534	0.00401	352.519	112.505	349.042	0	250.284	163.185	240.015	3.13337	0.496012
632.3/1.1 (63175)	632.313	1.13	4.7564	5.3979e-05	235.194	75.3095	241.849	0	56.4576	93.2261	159.885	3.12303	0.494577
158.1/1.1 (8677)	158.091	1.11	2.77192	0.00979	220.195	70.537	124.224	50.5958	198.062	100.095	149.658	3.1217	0.494391
768.4/1.1 (72820)	768.355	1.13	3.17406	0.00364	79.6067	25.6873	69.9359	0	42.7838	42.5799	53.9194	3.09907	0.491231
572.3/5.2 (56936)	572.292	5.2	3.59806	0.00122	49.693	16.115	40.5461	0	22.6272	23.7349	33.578	3.08365	0.489065
735.3/1.1 (70940)	735.338	1.12	3.77334	0.00077	92.7269	30.2169	83.2109	7.21807	38.6348	42.7024	62.51	3.06871	0.486956
455.2/5.7 (41626)	455.249	5.72	4.25476	0.00021	80.8606	26.6466	91.6459	15.105	29.0803	33.0715	54.2139	3.03455	0.482094
328.1/3.3 (22779)	328.15	3.29	2.78146	0.00957	55.4115	18.3185	67.0315	0	43.5029	28.4881	37.093	3.02489	0.480709
355.2/3.0 (27598)	355.159	2.96	3.52373	0.00148	175.098	58.0705	198.204	0	86.7224	81.9763	117.028	3.01527	0.479327
537.3/5.6 (52738)	537.339	5.63	2.87618	0.00761	172.938	58.512	187.793	0	57.2592	112.466	114.426	2.95559	0.470644
416.2/1.2 (36061)	416.177	1.15	4.17603	0.00026	364.339	124.959	367.93	0	57.5799	166.299	239.381	2.91567	0.464739
490.3/4.3 (46526)	490.274	4.29	2.81753	0.00878	163.138	56.005	244.411	15.9699	145.761	65.2194	107.133	2.91293	0.464329
143.1/1.0 (7769)	143.079	1.02	3.16995	0.00367	131.602	45.4555	155.703	0	77.1682	64.2793	86.1461	2.89518	0.461675
769.4/1.1 (72874)	769.366	1.14	2.77444	0.00974	88.6105	30.6607	98.7005	0	62.0395	48.045	57.9498	2.89004	0.460903
493.7/5.4 (46999)	493.732	5.44	2.94236	0.00648	28.0293	9.76342	30.0522	0	9.99748	17.3184	18.2659	2.87085	0.458011
555.8/7.4 (55041)	555.788	7.39	3.12194	0.00415	142.005	49.4926	160.611	0	58.8237	79.7553	92.5126	2.86922	0.457764
347.7/3.0 (26191)	347.679	2.97	3.69586	0.00094	250.36	87.4381	273.494	19.1895	99.0142	114.97	162.922	2.86329	0.456865
372.2/1.1 (29919)	372.153	1.15	2.80355	0.00908	44.391	15.7978	48.0978	0	18.2792	27.9962	28.5931	2.80994	0.448697
313.0/1.1 (20767)	313.048	1.1	3.6426	0.00109	41.1992	15.1795	45.8261	0	17.3204	18.167	26.0197	2.71414	0.433632
301.2/7.5 (19641)	301.222	7.46	2.79556	0.00925	114.306	42.6267	64.4564	24.2163	86.2781	53.1124	71.6792	2.68155	0.428386
379.2/2.8 (30909)	379.206	2.77	4.43416	0.00013	385.912	144.323	410.781	192.075	166.572	122.815	241.59	2.67396	0.427154
415.2/1.1 (35918)	415.192	1.12	3.43042	0.00189	354.94	134.439	386.303	0	94.8674	181.222	220.501	2.64015	0.421629
366.1/11.1 (29069)	366.14	11.09	7.0864	1.0398e-07	491.799	186.608	491.658	217.472	134.104	95.7369	305.191	2.63547	0.420857
506.4/14.9 (48680)	506.36	14.86	3.03098	0.0052	300.727	116.721	263.912	77.6044	131.874	159.844	184.007	2.57647	0.411025
158.1/1.1 (8689)	158.117	1.15	6.27553	8.7479e-07	295.652	118.191	258.338	120.513	66.9539	72.525	177.461	2.50148	0.398196
415.2/8.1 (35923)	415.197	8.13	3.40355	0.00202	75.5735	30.5371	65.9543	8.60822	23.3662	36.413	45.0364	2.47481	0.393541
395.1/1.0 (33063)	395.093	1.01	5.4428	8.2778e-06	585.759	239.095	592.916	301.137	29.4686	188.236	346.664	2.4499	0.389149
408.2/1.1 (34885)	408.232	1.15	3.31505	0.00254	296.347	121.121	300.79	127.599	131.492	133.141	175.226	2.44671	0.388582
510.2/9.2 (49209)	510.169	9.18	2.82987	0.00852	179.181	73.9321	198.421	30.1759	74.8662	99.7908	105.248	2.42358	0.384458
658.3/4.2 (65398)	658.301	4.16	3.23497	0.00312	211.573	87.3854	211.512	23.2749	35.2495	111.809	124.188	2.42115	0.384021
274.1/8.5 (16984)	274.091	8.51	5.01774	2.642e-05	274.949	113.575	270.852	125.435	31.9841	93.3459	161.374	2.42086	0.38397
589.3/1.1 (58809)	589.307	1.13	3.97348	0.00045	315.789	130.864	328.337	135.25	82.3219	128.035	184.925	2.41311	0.382577
798.4/8.3 (74368)	798.427	8.27	3.56971	0.00131	129.947	54.4013	130.777	0	28.2757	60.2528	75.5455	2.38867	0.378156
291.1/7.6 (18700)	291.133	7.58	4.73815	5.6739e-05	434.056	184.624	448.384	201.657	55.0098	152.423	249.433	2.35103	0.371259
292.1/8.6 (18779)	292.102	8.57	4.54221	9.6852e-05	79.9587	34.3077	78.8758	35.5389	8.63512	29.3442	45.6509	2.33063	0.367473
442.2/5.0 (39793)	442.227	5.01	3.53439	0.00144	111.731	48.223	123.838	55.2443	67.3842	32.1159	63.5076	2.31696	0.364918
311.1/2.8 (20581)	311.123	2.82	3.28175	0.00277	1040.04	451.859	1147.95	497.551	442.556	452.744	588.179	2.30169	0.362046
274.1/11.1 (16997)	274.093	11.11	3.18206	0.00356	220.606	96.7442	248.413	124.883	150.874	65.2567	123.861	2.2803	0.357992
258.1/1.0 (15528)	258.145	1.03	4.49083	0.00011	806.247	353.604	792.649	505.734	79.2359	295.115	452.643	2.28009	0.357951
341.0/1.1 (24952)	341.045	1.1	4.16072	0.00027	88.8752	39.0385	98.1784	34.7687	30.8289	29.7529	49.8367	2.2766	0.357287
450.2/7.6 (40865)	450.169	7.57	4.49397	0.00011	3386.27	1496.09	3533.45	1649.6	533.224	1202.74	1890.17	2.26341	0.354763
545.1/3.3 (53672)	545.098	3.28	3.82176	0.00068	524.86	233.079	466.492	299.108	209.624	183.94	291.781	2.25185	0.35254
695.3/1.1 (68250)	695.336	1.14	3.36542	0.00223	199.29	88.7517	192.283	35.2078	62.0753	89.2966	110.539	2.24548	0.35131
267.1/1.0 (16364)	267.107	1.03	4.59262	8.4415e-05	184.932	83.1257	180.212	93.9909	33.6966	62.2886	101.806	2.22472	0.347276
345.1/1.1 (25762)	345.139	1.12	3.0739	0.00468	233.456	109.512	232.204	100.446	53.6486	114.841	123.944	2.13178	0.328742
438.2/1.1 (39160)	438.158	1.14	3.36014	0.00226	152.003	71.7431	148.187	84.1019	29.6004	68.4228	80.2602	2.11872	0.326073
366.1/8.6 (29060)	366.139	8.57	4.10748	0.00031	184.547	88.2644	177.86	101.236	27.073	67.4767	96.2822	2.09084	0.32032
698.3/1.1 (68401)	698.311	1.12	3.25417	0.00297	192.17	92.1158	174.114	103.582	68.1292	80.5063	100.054	2.08617	0.319351
586.6/6.6 (58539)	586.572	6.58	3.06568	0.00477	113.787	55.4822	127.645	41.0892	37.4189	51.2853	58.3048	2.05087	0.311939
622.3/15.7 (62338)	622.338	15.68	2.93051	0.00667	48.2557	23.7501	48.6751	26.2872	10.7454	23.8866	24.5056	2.03181	0.307883
357.2/4.1 (27871)	357.176	4.13	3.16672	0.0037	288.438	142.006	283.613	87.6945	43.6174	134.53	146.432	2.03117	0.307747
453.2/2.9 (41325)	453.198	2.92	2.86707	0.00778	687.002	338.861	722.255	306.65	352.633	283.387	348.141	2.02739	0.306937
251.2/8.2 (14981)	251.16	8.23	2.85541	0.00801	12.3265	6.11772	10.3834	6.31928	5.02131	5.6227	6.20873	2.01488	0.304249
195.1/1.2 (10892)	195.111	1.17	3.17221	0.00365	31.8328	15.8791	31.6398	19.7994	3.70403	14.7511	15.9537	2.0047	0.302048
358.2/4.3 (27991)	358.16	4.25	3.94348	0.00049	449.135	225.674	458.955	271.118	96.5667	156.815	223.46	1.99019	0.298894
424.2/6.7 (37139)	424.153	6.72	3.15838	0.00378	1293.19	652.404	1380.62	532.026	211.56	587.497	640.79	1.9822	0.297147
390.2/1.6 (32439)	390.186	1.62	2.80016	0.00915	177.486	89.7758	136.658	102.88	114.72	58.2196	87.7104	1.97699	0.296005
385.1/1.1 (31641)	385.128	1.14	3.88412	0.00057	230.435	117.242	219.759	130.322	72.1193	73.5545	113.193	1.96547	0.293466
343.2/1.1 (25455)	343.171	1.08	3.47594	0.00168	299.745	152.58	291.827	193.756	43.5093	122.69	147.166	1.96452	0.293256
401.3/16.0 (33988)	401.267	15.99	3.6916	0.00095	53.2271	28.2394	55.1787	29.765	18.6518	16.2772	24.9877	1.88485	0.275278
130.0/1.0 (7001)	130.049	1.02	3.07431	0.00467	1794.25	972.195	1875.55	1100.23	523.229	721.891	822.056	1.84557	0.26613
436.6/3.5 (38953)	436.631	3.54	2.82198	0.00868	234.507	127.722	221.357	165.02	80.9715	100.034	106.785	1.83607	0.263889
219.1/1.1 (12495)	219.096	1.06	2.94964	0.00636	65.3901	36.2942	64.6637	42.8451	16.3377	27.4124	29.0959	1.80167	0.255675
666.2/3.3 (66062)	666.19	3.29	2.77389	0.00975	156.742	88.3764	172.307	102.994	66.4073	59.9469	68.366	1.77358	0.24885
386.2/1.1 (31845)	386.166	1.12	4.09825	0.00032	569.895	323.353	537.355	335.827	70.7247	172.97	246.543	1.76246	0.246119
376.2/8.1 (30517)	376.187	8.15	3.82353	0.00067	62.3458	37.1302	62.3662	40.4663	12.7947	17.8359	25.2157	1.67912	0.225081
343.1/6.3 (25409)	343.103	6.28	2.93996	0.00651	18.69	11.2279	17.0683	14.7554	4.17615	7.06009	7.46211	1.66461	0.221312
612.2/3.7 (61202)	612.211	3.73	4.10688	0.00032	278.675	169.854	290.625	136.344	43.3542	73.7613	108.821	1.64067	0.215022
250.0/1.1 (14845)	250.037	1.13	3.52548	0.00148	1154.1	712.29	1147.63	790.038	127.572	363.33	441.812	1.62027	0.209587
286.1/1.1 (18219)	286.149	1.05	3.64678	0.00107	1793.62	1108.88	1779.05	1110.35	157.062	548.716	684.739	1.61751	0.208846
203.1/1.8 (11403)	203.081	1.83	3.08078	0.0046	280.191	174.11	258.184	189.679	107.512	76.3789	106.081	1.60927	0.206629
374.2/7.9 (30232)	374.17	7.94	3.28922	0.00271	77.2695	48.0361	85.3455	54.9167	14.1599	24.8292	29.2334	1.60857	0.20644
148.1/1.0 (8115)	148.059	1.02	3.75989	0.0008	880.756	555.184	887.656	647.165	135.048	242.563	325.572	1.58642	0.200419
175.1/1.8 (9718)	175.086	1.85	3.04411	0.00504	107.454	68.1962	90.7309	77.3511	41.2626	28.0325	39.2573	1.57565	0.19746
422.2/1.1 (36885)	422.248	1.14	2.88807	0.0074	1117.29	747.164	1091.13	811.47	138.175	370.439	370.127	1.49538	0.17475
440.2/8.1 (39506)	440.248	8.05	3.07019	0.00472	314.684	215.455	292.712	227.762	55.9447	89.2268	99.2292	1.46056	0.164519
379.1/1.1 (30848)	379.12	1.06	3.91053	0.00053	952.257	657.594	929.53	598.486	63.2855	220.174	294.664	1.44809	0.160797
251.1/1.2 (14970)	251.149	1.2	2.80978	0.00894	91.3245	65.7437	94.8564	68.9147	21.0832	23.5214	25.5808	1.3891	0.142733
212.1/1.1 (11964)	212.102	1.12	-3.27707	0.0028	173.316	240.329	164.451	228.966	30.8743	57.5057	-67.0129	0.721162	-0.141967
504.3/1.1 (48389)	504.27	1.12	-2.96846	0.00607	426.416	696.633	489.181	645.78	173.987	246.935	-270.217	0.612111	-0.21317
244.2/13.4 (14395)	244.227	13.35	-2.91405	0.00694	41.7027	71.5566	42.2271	67.3915	18.3235	28.1321	-29.8539	0.582793	-0.234486
246.1/5.9 (14575)	246.131	5.94	-2.88421	0.00747	136.657	238.711	191.184	237.663	105.219	81.3272	-102.053	0.572481	-0.242239
403.2/1.1 (34277)	403.228	1.11	-3.42656	0.00191	566.569	1032.19	594.15	1026.12	77.47	400.575	-465.621	0.5489	-0.260507
431.3/12.2 (38272)	431.276	12.23	-2.82858	0.00854	84.9973	155.83	91.1532	153.772	15.0363	73.7596	-70.8325	0.545449	-0.263245
185.1/1.7 (10285)	185.091	1.69	-2.80977	0.00894	36.546	70.4051	39.7587	66.2137	12.6967	34.8756	-33.8591	0.519081	-0.284765
219.1/5.0 (12509)	219.112	5.02	-3.3679	0.00222	219.164	422.329	339.925	451.458	212.242	118.647	-203.165	0.518942	-0.284881
375.2/1.1 (30365)	375.187	1.13	-3.28048	0.00278	260.743	510.354	266.561	543.973	60.5645	222.705	-249.611	0.510906	-0.291659
577.2/13.1 (57499)	577.215	13.06	-3.08012	0.0046	193.94	380.033	196.033	373.557	72.7567	173.43	-186.094	0.510323	-0.292155
348.2/1.1 (26270)	348.175	1.14	-3.73097	0.00086	154.238	312.426	153.557	278.532	29.799	124.499	-158.188	0.493679	-0.306555
267.1/5.9 (16365)	267.11	5.95	-2.84911	0.00813	50.6526	104.225	83.8513	109.054	48.7561	46.5573	-53.5727	0.485992	-0.313371
351.2/13.3 (26911)	351.215	13.34	-3.07494	0.00466	31.0602	65.7695	31.6059	66.877	20.9233	30.8006	-34.7093	0.472259	-0.32582
649.2/13.4 (64576)	649.241	13.36	-3.50141	0.00157	88.8125	198.466	98.3785	190.61	46.3236	88.2721	-109.654	0.447494	-0.349213
635.3/13.2 (63417)	635.257	13.21	-2.9153	0.00692	77.5901	174.666	75.154	160.859	36.895	96.0998	-97.0758	0.44422	-0.352402
229.1/4.4 (13184)	229.1	4.42	-3.77733	0.00076	146.334	330.098	160.476	377.52	88.6757	133.151	-183.764	0.443306	-0.353296
195.1/1.1 (10870)	195.076	1.12	-4.0994	0.00032	67.8773	153.391	69.5283	171.362	17.7402	60.9266	-85.5135	0.442512	-0.354074
447.3/12.3 (40532)	447.25	12.29	-3.0119	0.00545	14.9913	34.3244	14.9189	35.5024	7.76875	18.4191	-19.3331	0.436754	-0.359763
423.4/12.9 (37058)	423.358	12.88	-2.85048	0.0081	23.9986	54.9866	23.0795	48.9522	14.7864	30.9016	-30.988	0.436445	-0.360071
451.2/6.5 (41040)	451.218	6.5	-4.03732	0.00038	130.382	299.55	144.324	319.771	69.5141	116.414	-169.167	0.435261	-0.36125
557.4/13.3 (55296)	557.35	13.28	-3.36143	0.00226	65.8382	152.099	82.2584	130.571	40.1459	71.8579	-86.2605	0.432865	-0.363648
651.2/12.9 (64736)	651.25	12.91	-4.12473	0.0003	152.141	351.777	157.357	350.717	92.0239	131.43	-199.636	0.432492	-0.364022
278.2/12.9 (17345)	278.209	12.91	-3.09367	0.00445	62.0162	146.077	50.7557	128.255	38.1212	77.0101	-84.0604	0.424546	-0.372075
482.8/13.3 (45422)	482.794	13.28	-2.85824	0.00795	23.0435	56.2513	28.4868	42.9933	14.2391	33.3085	-33.2078	0.409653	-0.387584
239.2/12.9 (14027)	239.199	12.92	-2.87951	0.00755	7.48654	18.3849	5.04607	19.9435	5.42319	10.7041	-10.8983	0.407212	-0.390179
307.2/13.2 (20238)	307.247	13.18	-2.85228	0.00807	13.4093	33.2977	11.4252	29.2724	7.48805	20.1593	-19.8884	0.402709	-0.395008
307.2/13.2 (20228)	307.187	13.25	-2.95264	0.00631	30.0264	76.1083	34.2017	63.5993	23.6427	43.8723	-46.0819	0.394522	-0.403929
263.2/13.1 (16064)	263.221	13.13	-2.92859	0.0067	38.5965	99.3742	38.5576	82.3354	16.8077	60.7103	-60.7777	0.388396	-0.410726
601.2/12.8 (60069)	601.24	12.84	-3.58749	0.00125	17.9035	46.6554	20.55	46.6908	19.4557	20.3745	-28.7519	0.383739	-0.415964
316.2/14.1 (21195)	316.248	14.12	-3.7618	0.00079	6.06394	16.0942	3.96389	15.0342	5.84631	7.00238	-10.0303	0.376778	-0.423915
579.4/13.3 (57797)	579.361	13.26	-2.96605	0.00611	39.332	105.673	44.7626	87.3622	26.8654	64.2167	-66.3415	0.372203	-0.42922
392.2/12.1 (32752)	392.229	12.14	-2.80562	0.00903	28.1641	76.2445	21.1222	54.9968	15.9913	49.8799	-48.0804	0.369391	-0.432513
637.2/13.1 (63576)	637.213	13.14	-3.60416	0.0012	151.995	411.625	167.133	339.045	70.0484	209.299	-259.63	0.369257	-0.432671
285.2/13.1 (18140)	285.204	13.13	-3.05859	0.00486	49.6628	136.283	48.5136	115.618	28.3721	82.1704	-86.6202	0.36441	-0.43841
667.2/12.9 (66140)	667.229	12.91	-2.9673	0.00609	37.5472	105.391	29.5005	107.633	31.0279	65.0048	-67.844	0.356265	-0.448227
661.4/13.2 (65724)	661.354	13.23	-3.29834	0.00265	22.345	64.0166	21.9736	47.6628	13.6491	36.5148	-41.6715	0.349051	-0.457111
279.2/7.1 (17497)	279.17	7.1	-3.03209	0.00519	37.7932	112.156	29.7734	87.062	28.0037	70.6499	-74.3626	0.336971	-0.472408
530.3/13.4 (51908)	530.251	13.45	-2.95579	0.00626	19.0624	57.7577	18.9294	61.3935	19.2389	36.9263	-38.6953	0.330041	-0.481432
254.2/4.9 (15244)	254.159	4.92	-2.89375	0.00729	21.3985	65.5915	0	74.7502	42.4846	36.5392	-44.1929	0.32624	-0.486463
304.1/1.1 (19879)	304.15	1.13	-3.90567	0.00054	65.5034	207.135	74.4789	188.556	25.6413	106.468	-141.632	0.316235	-0.499991
329.2/13.2 (23002)	329.23	13.18	-2.9749	0.00598	16.6199	53.4652	13.4032	46.4082	11.1688	36.0981	-36.8453	0.310855	-0.507442
267.1/1.1 (16387)	267.133	1.14	-2.80475	0.00905	23.0957	80.7012	27.2064	96.9893	21.0579	59.5245	-57.6055	0.286188	-0.543348
405.2/1.1 (34487)	405.196	1.12	-4.2846	0.0002	80.1426	281.661	108.374	250.53	62.5317	133.966	-201.518	0.284536	-0.545863
345.2/1.1 (25855)	345.227	1.09	-3.10903	0.00428	203.606	726.628	205.556	535.931	52.0561	498.522	-523.022	0.280207	-0.552521
310.2/13.2 (20543)	310.235	13.24	-2.90905	0.00703	10.6155	38.0292	6.19724	32.4265	11.3089	27.0573	-27.4137	0.27914	-0.554178
348.1/1.2 (26224)	348.07	1.15	-4.45964	0.00012	160.158	619.556	162.205	608.153	39.8179	304.893	-459.398	0.258504	-0.587532
357.3/13.2 (27929)	357.279	13.2	-2.99084	0.00575	9.548	37.0551	10.9686	34.5901	10.0629	26.5623	-27.5071	0.25767	-0.588936
294.2/12.9 (19013)	294.182	12.91	-3.35417	0.0023	9.69131	39.4539	6.57712	37.2841	10.5033	25.5014	-29.7626	0.245636	-0.609707
506.3/3.9 (48665)	506.297	3.92	-2.89979	0.00719	38.126	160.49	41.1202	140.377	32.9758	123.572	-122.364	0.23756	-0.624226
269.2/14.2 (16587)	269.21	14.16	-3.13243	0.00404	4.69326	20.0718	2.4066	16.9094	8.46301	13.5623	-15.3785	0.233824	-0.631111
284.1/6.5 (18007)	284.139	6.46	-6.91695	1.6133e-07	35.5419	155.496	42.0142	157.419	29.4052	48.0282	-119.954	0.228571	-0.640978
317.1/8.7 (21260)	317.126	8.74	-3.78658	0.00074	4.43699	19.449	2.87981	19.4436	5.71042	11.2065	-15.012	0.228135	-0.641809
247.1/7.3 (14684)	247.144	7.28	-5.31997	1.157e-05	50.4251	223.384	44.698	225.761	14.4956	96.1174	-172.959	0.225732	-0.646406
244.2/1.0 (14378)	244.165	1.02	-3.99745	0.00042	28.8484	131.118	32.0289	119.514	15.9986	75.3034	-102.27	0.220018	-0.657542
467.2/4.5 (43269)	467.213	4.46	-3.09882	0.00439	77.0144	353.946	70.6805	404.443	58.8758	262.781	-276.932	0.217588	-0.662365
586.3/13.8 (58462)	586.273	13.83	-2.81183	0.0089	14.2087	65.5229	10.7295	41.0436	11.4009	53.7161	-51.3142	0.216851	-0.663838
595.3/13.2 (59417)	595.265	13.2	-2.79236	0.00933	4.72967	22.1369	3.52219	19.8501	6.23479	18.0889	-17.4073	0.213655	-0.670286
441.2/1.1 (39626)	441.207	1.11	-4.29038	0.00019	86.3277	406.565	0	432.686	130.095	205.836	-320.237	0.212334	-0.67298
581.8/13.3 (58035)	581.839	13.25	-3.01363	0.00543	9.18349	43.4273	0	30.7207	12.16	32.8583	-34.2438	0.211468	-0.674756
242.3/13.0 (14212)	242.284	12.98	-3.48688	0.00163	4.77776	22.9463	3.41921	17.0399	3.97079	15.2694	-18.1685	0.208215	-0.681487
364.1/1.1 (28783)	364.065	1.14	-5.15679	1.8066e-05	52.3438	251.548	47.5967	277.412	30.3482	113.107	-199.204	0.208087	-0.681756
415.2/4.9 (35946)	415.218	4.85	-3.52398	0.00148	13.5526	65.6994	14.7117	65.3751	12.2932	43.2537	-52.1468	0.206282	-0.685539
528.4/13.4 (51682)	528.374	13.36	-3.17619	0.00362	8.02161	39.1703	5.30172	40.822	7.72702	28.7122	-31.1487	0.204788	-0.688696
346.2/1.1 (25949)	346.163	1.12	-3.07828	0.00462	22.9097	111.937	0	109.564	45.51	80.9254	-89.0276	0.204666	-0.688955
681.3/13.0 (67201)	681.262	13.03	-2.86844	0.00776	11.6151	56.9474	10.069	40.32	11.0499	46.4116	-45.3322	0.203962	-0.69045
393.3/13.2 (32900)	393.309	13.16	-2.84128	0.00829	6.25443	30.9826	0	31.0418	8.51004	25.2805	-24.7282	0.201869	-0.69493
261.2/8.3 (15846)	261.16	8.29	-5.03434	2.5248e-05	88.1464	449.029	99.1686	453.032	23.7454	212.361	-360.882	0.196305	-0.707069
317.2/1.1 (21318)	317.217	1.09	-3.11136	0.00426	37.9084	195.067	43.5711	159.505	9.58795	149.888	-157.159	0.194335	-0.711449
262.1/3.4 (15903)	262.118	3.45	-3.16425	0.00373	17.1262	89.3451	0	85.6637	28.8903	65.2729	-72.2189	0.191686	-0.717409
312.2/12.7 (20737)	312.193	12.71	-2.8034	0.00908	3.37082	18.5261	0	11.4837	4.5538	15.7946	-15.1552	0.18195	-0.740047
721.4/13.2 (70063)	721.354	13.24	-2.91433	0.00694	4.24271	25.2554	0	17.5264	7.35743	20.9012	-21.0127	0.167992	-0.774711
328.2/4.9 (22830)	328.223	4.91	-4.0076	0.00041	77.189	464.163	61.5348	493.07	53.8149	284.742	-386.974	0.166297	-0.779114
567.2/13.1 (56361)	567.209	13.07	-3.05117	0.00495	5.27435	32.4368	2.9789	24.3928	7.18326	26.0452	-27.1624	0.162604	-0.788868
374.2/5.6 (30277)	374.229	5.62	-3.86382	0.0006	52.5964	339.029	42.9418	282.811	24.4721	219.616	-286.433	0.155138	-0.809281
455.2/1.1 (41612)	455.227	1.12	-4.97765	2.9481e-05	40.1081	258.938	0	244.457	49.0412	126.824	-218.83	0.154895	-0.809964
347.2/1.0 (26168)	347.231	1.04	-3.05583	0.00489	48.6759	314.669	47.4219	314.469	14.7968	258.34	-265.993	0.154689	-0.81054
288.2/1.1 (18440)	288.202	1.09	-2.84645	0.00818	457.567	2994.84	576.384	3378.84	267.75	2641.85	-2537.28	0.152785	-0.815919
352.3/13.3 (27126)	352.32	13.33	-2.96334	0.00615	1.96667	13.1626	1.45078	10.5124	2.56845	11.1023	-11.1959	0.149414	-0.825609
316.2/1.1 (21159)	316.184	1.14	-5.09465	2.141e-05	14.6971	99.4234	15.3346	90.1223	11.199	48.8794	-84.7263	0.147824	-0.830256
286.2/4.0 (18235)	286.175	3.98	-2.85402	0.00803	17.0157	117.083	17.9685	119.179	10.1771	103.93	-100.068	0.14533	-0.837645
300.2/7.9 (19473)	300.168	7.85	-2.95642	0.00626	0.679874	5.57596	0	6.37055	1.38107	4.84013	-4.89608	0.12193	-0.913891
303.1/1.1 (19787)	303.143	1.13	-2.96023	0.0062	26.5282	234.792	20.2196	149.08	29.3569	208.114	-208.264	0.112986	-0.946976
185.1/4.9 (10312)	185.128	4.85	-6.44701	5.5445e-07	48.7528	495.856	38.182	475.38	34.4191	204.807	-447.103	0.0983205	-1.00736
512.2/1.1 (49505)	512.245	1.12	-3.41109	0.00198	12.7684	135.024	0	147.42	38.3052	103.648	-122.256	0.0945638	-1.02428
477.3/8.0 (44645)	477.268	8.05	-2.9005	0.00717	6.21415	66.0385	4.64255	81.2027	7.08342	61.0906	-59.8243	0.094099	-1.02642
220.1/2.9 (12590)	220.118	2.94	-2.89967	0.00719	87.9251	966.162	0	938.143	130.444	895.702	-878.237	0.0910045	-1.04094
401.2/2.9 (33947)	401.203	2.93	-3.01621	0.0054	10.7209	129.116	0	113.813	21.3973	115.787	-118.395	0.0830337	-1.08075
572.3/13.1 (56922)	572.26	13.08	-2.92949	0.00668	3.65777	45.7952	2.79862	43.9081	4.7255	42.6132	-42.1374	0.0798724	-1.0976
383.2/3.3 (31436)	383.228	3.3	-3.61295	0.00117	50.3369	689.697	63.5815	453.873	36.3885	525.051	-639.36	0.0729841	-1.13677
396.2/3.5 (33245)	396.175	3.45	-2.76942	0.00985	7.22238	99.2001	0	78.1013	9.47036	98.4523	-91.9777	0.0728062	-1.13783
359.2/5.5 (28197)	359.229	5.5	-6.93	1.5595e-07	19.0734	270.212	16.154	249.188	17.4457	107.058	-251.138	0.0705867	-1.15128
328.2/4.6 (22827)	328.222	4.64	-3.02333	0.0053	15.9097	227.557	21.997	183.058	15.5224	207.671	-211.647	0.0699154	-1.15543
274.2/1.0 (17071)	274.187	1.03	-3.09396	0.00445	74.5382	1102.77	88.8715	1334.92	57.3924	986.312	-1028.23	0.067592	-1.1701
310.1/1.1 (20515)	310.138	1.1	-2.82296	0.00866	24.0385	358.731	0	405.035	67.5938	349.503	-334.693	0.0670097	-1.17386
536.3/5.8 (52591)	536.272	5.82	-3.48305	0.00165	4.78891	74.1695	0	79.6141	5.70073	59.0479	-69.3806	0.0645671	-1.18999
245.2/4.9 (14516)	245.186	4.92	-3.04936	0.00497	55.2927	857.073	26.8357	462.129	53.2609	780.146	-801.78	0.0645134	-1.19035
484.3/6.2 (45686)	484.313	6.19	-2.83128	0.00849	0.72332	11.2241	0	6.85895	1.60403	10.9679	-10.5008	0.0644436	-1.19082
590.4/13.3 (58940)	590.368	13.34	-2.77349	0.00976	0.793082	12.4133	0	8.59178	2.37925	12.3516	-11.6202	0.0638899	-1.19457
202.1/3.0 (11327)	202.107	2.96	-2.87022	0.00772	3.48829	60.8956	0	57.1118	5.66539	59.2918	-57.4073	0.0572831	-1.24197
254.1/1.0 (15221)	254.111	1.05	-2.8202	0.00872	2.57538	44.9628	0	62.2834	5.16192	44.5171	-42.3875	0.0572779	-1.24201
388.2/6.0 (32198)	388.22	6	-3.61911	0.00115	1.77706	32.2329	0	41.0701	2.62648	24.9368	-30.4558	0.0551321	-1.2586
342.2/5.9 (25359)	342.241	5.88	-2.8151	0.00883	35.764	664.789	3.54218	631.36	45.636	662.976	-629.025	0.0537976	-1.26924
439.3/6.2 (39376)	439.29	6.21	-3.31607	0.00253	9.75685	183.334	7.5635	116.102	10.0373	155.325	-173.577	0.053219	-1.27393
400.2/6.5 (33778)	400.187	6.54	-3.02557	0.00527	4.69697	89.46	5.69057	116.974	3.10782	83.1786	-84.763	0.0525036	-1.27981
180.1/4.2 (10045)	180.101	4.24	-2.80767	0.00899	16.9926	333.677	2.54685	455.551	25.5154	334.589	-316.685	0.0509251	-1.29307
316.2/2.9 (21165)	316.187	2.92	-4.50336	0.00011	5.49355	111.884	0	111.044	8.83719	69.939	-106.391	0.0491002	-1.30892
306.2/1.1 (20107)	306.159	1.08	-3.08223	0.00458	6.23033	127.294	4.94652	104.197	6.42328	116.578	-121.063	0.0489445	-1.3103
278.2/1.1 (17335)	278.152	1.07	-2.9041	0.00711	3.56136	75.729	0	90.268	5.86135	73.7084	-72.1676	0.0470277	-1.32765
415.3/5.3 (35977)	415.255	5.35	-2.92185	0.00681	4.62325	102.166	0	92.0787	9.37016	98.9676	-97.5426	0.0452524	-1.34436
170.1/1.1 (9447)	170.08	1.1	-3.22773	0.00317	1.93822	43.2422	0	40.1953	3.98828	37.9201	-41.304	0.0448224	-1.34851
514.3/4.9 (49766)	514.264	4.88	-2.80697	0.009	2.59606	58.9761	0	33.504	7.78819	59.4479	-56.38	0.0440189	-1.35636
121.1/4.2 (6634)	121.065	4.24	-2.82046	0.00871	7.93341	184.245	0	253.524	12.9332	185.47	-176.311	0.0430591	-1.36594
181.1/4.7 (10082)	181.096	4.67	-7.03596	1.1846e-07	8.64099	205.369	0	206.737	10.3789	82.7782	-196.728	0.0420754	-1.37597
237.1/3.5 (13865)	237.122	3.45	-2.80136	0.00913	6.03493	167.728	3.97716	53.7441	5.34709	171.385	-161.694	0.0359803	-1.44393
146.1/6.4 (7979)	146.061	6.37	-3.71963	0.00089	1.47385	45.8197	0	45.0882	2.31777	35.3765	-44.3458	0.0321664	-1.4926
104.1/1.0 (5845)	104.107	1.01	-2.95728	0.00624	17.1247	564.971	16.8285	754.62	9.61699	550.141	-547.846	0.0303107	-1.5184
608.3/15.7 (60830)	608.32	15.72	-2.96984	0.00605	3.93974	141.276	0	157.952	6.23574	137.279	-137.336	0.0278869	-1.5546
229.1/4.0 (13204)	229.118	3.98	-3.13918	0.00397	2.08934	75.4737	0	93.1315	4.66638	69.3631	-73.3844	0.027683	-1.55779
332.2/5.5 (23497)	332.218	5.54	-6.33332	7.4994e-07	7.80158	289.798	4.27741	280.482	9.94957	132.085	-281.997	0.0269207	-1.56991
578.3/7.1 (57635)	578.279	7.09	-2.95759	0.00624	2.11083	79.8017	0	97.6247	6.33248	77.91	-77.6909	0.0264509	-1.57756
473.3/6.3 (44162)	473.295	6.27	-2.78691	0.00945	0.601321	24.3434	0	15.7513	1.80396	25.2748	-23.7421	0.0247016	-1.60727
399.3/5.8 (33665)	399.258	5.8	-3.04772	0.00499	4.94335	221.725	3.36187	156.997	6.79747	211.199	-216.782	0.022295	-1.65179
484.3/5.6 (45684)	484.312	5.64	-3.46608	0.00172	1.00775	46.2604	0	55.602	3.02325	38.7268	-45.2527	0.0217843	-1.66186
732.4/7.7 (70744)	732.356	7.68	-3.05203	0.00494	1.49906	69.4067	0	69.3056	2.69759	66.057	-67.9077	0.0215981	-1.66558
247.2/14.2 (14702)	247.226	14.23	-3.75406	0.00081	0.120358	6.41421	0	6.57089	0.361074	4.97384	-6.29385	0.0187643	-1.72667
415.3/4.4 (35971)	415.254	4.4	-2.78262	0.00955	7.59486	406.409	11.1793	393.65	7.57312	425.622	-398.814	0.0186877	-1.72844
385.2/5.2 (31717)	385.242	5.17	-3.01813	0.00537	2.64476	150.457	0	171.187	4.27214	145.423	-147.813	0.0175781	-1.75503
488.3/11.1 (46274)	488.3	11.06	-2.87429	0.00765	0.37881	21.7544	0	22.1598	1.13643	22.0745	-21.3756	0.0174131	-1.75912
364.2/6.5 (28861)	364.222	6.5	-2.93434	0.0066	0.514659	33.2572	0	44.8899	1.02818	33.1324	-32.7425	0.0154751	-1.81037
283.1/8.3 (17903)	283.142	8.28	-3.66059	0.00104	0.401723	27.9881	0	28.0045	1.20517	22.3679	-27.5864	0.0143534	-1.84305
352.2/6.0 (27054)	352.165	6.02	-2.86901	0.00775	1.26626	89.9792	0	40.9999	2.56788	91.8165	-88.7129	0.0140728	-1.85162
288.2/4.7 (18429)	288.192	4.7	-3.03959	0.00509	1.88165	142.188	0.305923	118.521	2.31381	137.079	-140.306	0.0132336	-1.87832
317.2/1.1 (21291)	317.182	1.13	-5.31097	1.1858e-05	1.61903	123.161	0	142.71	3.21272	67.9349	-121.542	0.0131456	-1.88122
260.2/3.6 (15730)	260.196	3.6	-3.06845	0.00474	0.542177	43.3692	0	40.3843	1.10345	41.4449	-42.8271	0.0125014	-1.90304
399.3/6.4 (33666)	399.259	6.45	-2.99989	0.00562	2.04394	165.109	0	88.9018	2.9207	161.422	-163.065	0.0123793	-1.9073
429.3/5.2 (37955)	429.27	5.24	-2.77949	0.00962	1.21619	114.323	0	72.4572	1.897	120.847	-113.107	0.0106382	-1.97313
519.2/7.5 (50450)	519.245	7.54	-3.15151	0.00385	2.52474	249.441	0	262.987	4.74865	232.664	-246.917	0.0101216	-1.99475
604.3/8.2 (60407)	604.297	8.2	-2.90148	0.00716	9.81338	1067.48	5.63435	1477.63	12.0892	1082.57	-1057.67	0.00919299	-2.03654
393.2/5.9 (32856)	393.212	5.92	-3.13933	0.00397	5.10125	555.749	0	569.06	7.19902	520.9	-550.648	0.00917904	-2.0372
245.1/6.3 (14472)	245.129	6.27	-10.3585	4.3981e-11	14.7924	1719.35	4.7866	1696.19	18.688	488.567	-1704.56	0.00860347	-2.06533
626.3/8.2 (62643)	626.278	8.2	-2.90783	0.00705	3.48266	449.136	0	554.77	5.05969	455.147	-445.653	0.00775413	-2.11047
518.3/14.3 (50372)	518.321	14.28	-2.97928	0.00591	26.8597	3530.92	0	4091.22	45.4935	3492.85	-3504.06	0.00760701	-2.11879
385.2/5.4 (31722)	385.244	5.44	-3.08504	0.00455	1.98322	266.571	0	180.441	4.65429	254.692	-264.588	0.00743974	-2.12844
107.0/2.6 (5909)	107.049	2.57	-2.89728	0.00723	0.587706	79.2634	0	99.0121	1.16896	80.643	-78.6757	0.00741459	-2.12991
497.2/8.0 (47483)	497.234	7.97	-2.79998	0.00916	0.201576	33.2606	0	39.6163	0.604729	35.0625	-33.059	0.00606052	-2.21749
344.3/5.9 (25695)	344.254	5.9	-3.04899	0.00497	0.595174	99.1398	0	91.3406	1.78552	95.9802	-98.5446	0.00600338	-2.2216
318.2/4.4 (21422)	318.202	4.4	-2.90034	0.00718	0.672381	112.853	0	101.792	1.02886	114.867	-112.18	0.00595803	-2.2249
300.2/3.4 (19481)	300.189	3.42	-3.13398	0.00402	0.0949859	16.5971	0	17.6479	0.284958	15.6368	-16.5021	0.00572306	-2.24237
498.3/5.0 (47626)	498.303	5	-2.83978	0.00832	1.59784	283.829	0	322.82	3.32691	295.151	-282.231	0.00562958	-2.24952
198.1/1.1 (11052)	198.087	1.14	-8.14412	7.2503e-09	0.618045	112.893	0	110.657	1.85414	40.9254	-112.275	0.00547463	-2.26165
455.3/8.3 (41641)	455.287	8.29	-2.91491	0.00693	0.39812	101.686	0	133.465	1.19436	103.194	-101.287	0.00391521	-2.40725
493.3/5.8 (46978)	493.275	5.77	-2.92431	0.00677	0.428787	112.787	0	171.007	1.28636	114.105	-112.358	0.00380174	-2.42002
550.3/6.2 (54349)	550.286	6.25	-3.05442	0.00491	0.299964	81.6544	0	87.2142	0.899892	79.1	-81.3545	0.00367358	-2.43491
332.2/5.8 (23502)	332.218	5.78	-4.54079	9.7228e-05	0.580472	273.535	0	221.879	1.27139	178.521	-272.954	0.00212211	-2.67323
470.3/6.7 (43724)	470.26	6.72	-2.91078	0.007	0.321193	170.224	0	187.304	0.963578	173.349	-169.903	0.00188688	-2.72426
399.3/5.3 (33670)	399.26	5.29	-3.62007	0.00115	0.225167	143.654	0	113.445	0.675502	117.666	-143.429	0.00156742	-2.80481
227.2/8.3 (13038)	227.175	8.29	-3.76218	0.00079	0.195247	132.507	0	156.055	0.585741	104.445	-132.311	0.00147349	-2.83165
227.2/8.1 (13037)	227.175	8.05	-4.80485	4.7286e-05	0.149423	114.526	0	128.866	0.448269	70.6947	-114.376	0.00130471	-2.88448
380.2/6.1 (31059)	380.22	6.11	-2.80617	0.00902	0.128675	103.008	0	60.9243	0.386026	108.879	-102.879	0.00124918	-2.90337
419.2/5.0 (36526)	419.249	5.03	-2.81276	0.00888	0.08174	78.2692	0	96.5042	0.24522	82.5541	-78.1875	0.00104434	-2.98116
519.3/8.1 (50463)	519.281	8.11	-2.98391	0.00585	0.121531	150.525	0	223.452	0.364594	149.695	-150.404	0.000807381	-3.09292
375.2/4.6 (30393)	375.222	4.64	-2.8542	0.00803	0.0410954	55.4714	0	43.3251	0.123286	57.6762	-55.4303	0.000740839	-3.13028
267.1/6.3 (16367)	267.11	6.27	-9.32027	4.4469e-10	0	107.536	0	110.517	0	34.2659	-107.536	0	#NAME?
211.1/5.8 (11917)	211.144	5.79	-8.56343	2.6247e-09	0	2545.83	0	2519.19	0	882.907	-2545.83	0	#NAME?
213.2/6.8 (12063)	213.159	6.84	-8.02681	9.674e-09	0	170.819	0	174.96	0	63.2014	-170.819	0	#NAME?
233.1/5.8 (13598)	233.124	5.77	-4.82972	4.4178e-05	0	46.6654	0	48.1597	0	28.6951	-46.6654	0	#NAME?
229.1/4.7 (13185)	229.1	4.67	-4.41109	0.00014	0	103.049	0	102.167	0	69.3796	-103.049	0	#NAME?
442.3/5.3 (39818)	442.265	5.32	-4.14323	0.00029	0	182.085	0	168.95	0	130.518	-182.085	0	#NAME?
376.2/6.2 (30536)	376.223	6.23	-3.78203	0.00075	0	132.422	0	125.968	0	103.985	-132.422	0	#NAME?
245.1/7.0 (14473)	245.131	6.97	-3.62658	0.00113	0	21.2815	0	22.0512	0	17.4277	-21.2815	0	#NAME?
381.0/6.3 (31126)	381.041	6.3	-3.58182	0.00127	0	34.6711	0	30.41	0	28.7474	-34.6711	0	#NAME?
475.3/7.3 (44421)	475.291	7.26	-3.5301	0.00146	0	50.5511	0	31.8755	0	42.5283	-50.5511	0	#NAME?
443.2/6.9 (39940)	443.249	6.89	-3.13001	0.00406	0	94.9112	0	86.7782	0	90.0545	-94.9112	0	#NAME?
368.0/1.0 (29320)	368.024	1.03	-3.11279	0.00424	0	48.1446	0	47.1445	0	45.9338	-48.1446	0	#NAME?
144.1/3.8 (7853)	144.08	3.81	-3.01625	0.0054	0	8.1621	0	6.9917	0	8.03652	-8.1621	0	#NAME?
187.1/4.6 (10440)	187.107	4.61	-2.98926	0.00577	0	23.6362	0	18.7694	0	23.4827	-23.6362	0	#NAME?
462.1/8.3 (42588)	462.141	8.29	-2.98601	0.00582	0	21.2834	0	22.4652	0	21.1682	-21.2834	0	#NAME?
752.4/8.4 (71926)	752.356	8.41	-2.97932	0.00591	0	25.316	0	27.8942	0	25.2355	-25.316	0	#NAME?
454.3/6.2 (41491)	454.283	6.24	-2.97623	0.00596	0	30.4322	0	35.8228	0	30.3669	-30.4322	0	#NAME?
358.3/7.1 (28063)	358.27	7.08	-2.97232	0.00601	0	18.3608	0	10.77	0	18.3455	-18.3608	0	#NAME?
477.3/8.3 (44639)	477.265	8.26	-2.95793	0.00623	0	87.9217	0	139.588	0	88.276	-87.9217	0	#NAME?
403.3/4.8 (34298)	403.254	4.77	-2.95331	0.0063	0	38.4	0	41.7085	0	38.615	-38.4	0	#NAME?
455.3/8.1 (41638)	455.286	8.08	-2.93636	0.00657	0	60.1853	0	76.1538	0	60.8716	-60.1853	0	#NAME?
575.6/7.4 (57345)	575.641	7.44	-2.93591	0.00658	0	23.0664	0	34.669	0	23.3331	-23.0664	0	#NAME?
671.9/15.6 (66514)	671.881	15.58	-2.92787	0.00671	0	22.8717	0	22.3777	0	23.1997	-22.8717	0	#NAME?
403.3/4.6 (34295)	403.253	4.57	-2.90708	0.00706	0	45.767	0	40.2898	0	46.7552	-45.767	0	#NAME?
723.9/6.4 (70220)	723.881	6.41	-2.89643	0.00725	0	39.6285	0	36.4393	0	40.633	-39.6285	0	#NAME?
642.3/8.2 (63950)	642.251	8.2	-2.89545	0.00726	0	122.611	0	120.351	0	125.761	-122.611	0	#NAME?
259.7/14.3 (15672)	259.657	14.28	-2.89491	0.00727	0	47.0655	0	51.4278	0	48.2839	-47.0655	0	#NAME?
542.3/13.5 (53348)	542.324	13.47	-2.89466	0.00728	0	149.756	0	164.98	0	153.646	-149.756	0	#NAME?
204.1/1.1 (11509)	204.123	1.09	-2.89302	0.00731	0	283.258	0	217.738	0	290.78	-283.258	0	#NAME?
507.3/8.4 (48823)	507.283	8.38	-2.89172	0.00733	0	15.4178	0	15.5744	0	15.8344	-15.4178	0	#NAME?
541.2/7.5 (53162)	541.225	7.54	-2.88027	0.00754	0	68.6474	0	71.5905	0	70.7825	-68.6474	0	#NAME?
376.2/6.8 (30535)	376.222	6.75	-2.87476	0.00764	0	107.237	0	98.1221	0	110.784	-107.237	0	#NAME?
560.3/7.9 (55626)	560.302	7.93	-2.85397	0.00803	0	21.3676	0	21.3489	0	22.2352	-21.3676	0	#NAME?
733.4/7.5 (70840)	733.41	7.54	-2.84347	0.00824	0	91.5298	0	111.187	0	95.598	-91.5298	0	#NAME?
489.3/8.5 (46403)	489.27	8.53	-2.83667	0.00838	0	54.9978	0	48.0626	0	57.5799	-54.9978	0	#NAME?
244.1/12.1 (14331)	244.063	12.11	-2.81522	0.00883	0	2.96793	0	3.5574	0	3.13094	-2.96793	0	#NAME?
481.3/6.6 (45193)	481.255	6.63	-2.81406	0.00885	0	49.8459	0	54.6674	0	52.6055	-49.8459	0	#NAME?
276.6/14.3 (17203)	276.634	14.28	-2.80445	0.00906	0	89.5521	0	94.2932	0	94.8336	-89.5521	0	#NAME?
754.3/7.7 (72027)	754.338	7.69	-2.80263	0.0091	0	37.4432	0	21.5736	0	39.6772	-37.4432	0	#NAME?
425.3/1.0 (37353)	425.265	1.02	-2.79744	0.00921	0	113.777	0	90.9636	0	120.79	-113.777	0	#NAME?
491.3/8.9 (46667)	491.283	8.85	-2.79058	0.00937	0	29.4152	0	32.4255	0	31.3048	-29.4152	0	#NAME?
592.3/8.3 (59132)	592.332	8.25	-2.78767	0.00943	0	26.6969	0	31.5237	0	28.4416	-26.6969	0	#NAME?
262.1/5.1 (15888)	262.097	5.08	-2.78013	0.0096	0	61.1745	0	63.0269	0	65.3491	-61.1745	0	#NAME?
469.3/8.9 (43605)	469.301	8.85	-2.77932	0.00962	0	31.56	0	30.6531	0	33.7236	-31.56	0	#NAME?
443.3/6.0 (39968)	443.288	5.96	-2.77356	0.00976	0	43.7986	0	31.4405	0	46.8983	-43.7986	0	#NAME?
588.3/6.8 (58715)	588.302	6.77	-2.77175	0.0098	0	110.262	0	74.7242	0	118.142	-110.262	0	#NAME?
387.3/1.1 (32071)	387.274	1.12	-2.76674	0.00992	0	587.653	0	306.801	0	630.794	-587.653	0	#NAME?
413.7/4.7 (35691)	413.738	4.72	-2.76461	0.00997	0	28.3371	0	30.229	0	30.4408	-28.3371	0	#NAME?
499.1/1.0 (47691)	499.115	1.03	-2.76382	0.00999	0	93.6347	0	60.5017	0	100.615	-93.6347	0	#NAME?

## Sheet: Beauveria live brain p<0.01
Sheet 3: Ion peaks significantly higher (p<0.01) in B. bassiana grown on live ant brain tissue. Yellow markings indicate beauverolides
Peak name	M/z	Ret. Time	t-value	p-value	mean1	mean2	median1	median2	sigma1	sigma2	Delta	Fold Change	Log(Fold Change)
384.1/6.2 (31510)	384.109	6.22	40.545	2.0568e-26	111.622	0	104.811	0	16.9262	0	111.622	Infinity	Infinity
649.3/5.5 (64611)	649.331	5.46	9.88335	1.2463e-10	114.925	0	93.2812	0	71.4916	0	114.925	Infinity	Infinity
463.2/1.1 (42717)	463.197	1.12	7.07336	1.0754e-07	162.67	0	231.929	0	141.393	0	162.67	Infinity	Infinity
662.3/3.8 (65758)	662.275	3.77	7.02043	1.2332e-07	2.77219	0	3.79742	0	2.42775	0	2.77219	Infinity	Infinity
297.1/9.5 (19190)	297.054	9.52	6.99839	1.3057e-07	5.69969	0	7.70829	0	5.00725	0	5.69969	Infinity	Infinity
576.3/7.0 (57396)	576.276	7	6.94332	1.5064e-07	112.829	0	122.693	0	99.9075	0	112.829	Infinity	Infinity
351.3/12.8 (26922)	351.25	12.8	6.74521	2.5262e-07	10.1523	0	12.3425	0	9.25368	0	10.1523	Infinity	Infinity
518.2/1.1 (50310)	518.239	1.11	6.59725	3.7271e-07	170.436	0	196.985	0	158.834	0	170.436	Infinity	Infinity
649.3/7.2 (64582)	649.268	7.24	5.81679	2.9995e-06	40.1131	0	21.5115	0	42.3984	0	40.1131	Infinity	Infinity
618.3/12.2 (61908)	618.325	12.21	5.21584	1.5375e-05	7.4134	0	5.19192	0	8.73854	0	7.4134	Infinity	Infinity
409.2/12.3 (34973)	409.168	12.33	4.86922	3.9656e-05	11.9524	0	6.94597	0	15.0919	0	11.9524	Infinity	Infinity
550.3/3.9 (54335)	550.265	3.87	4.82667	4.4547e-05	422.544	0	220.951	0	538.232	0	422.544	Infinity	Infinity
504.3/4.6 (48377)	504.256	4.65	4.31381	0.00018	47.6731	0	17.5468	0	67.9451	0	47.6731	Infinity	Infinity
504.3/5.0 (48375)	504.255	5	4.23695	0.00022	73.5616	0	24.6929	0	106.744	0	73.5616	Infinity	Infinity
218.9/1.3 (12473)	218.927	1.26	3.65618	0.00105	13.5172	0	0.791662	0	22.7303	0	13.5172	Infinity	Infinity
121.1/6.3 (6632)	121.064	6.31	3.54965	0.00139	0.0861573	0	0	0	0.149229	0	0.0861573	Infinity	Infinity
156.0/12.6 (8512)	156.042	12.55	3.54965	0.00139	0.931421	0	0	0	1.61327	0	0.931421	Infinity	Infinity
167.1/1.1 (9290)	167.076	1.08	3.54965	0.00139	3.94089	0	0	0	6.82582	0	3.94089	Infinity	Infinity
178.1/1.1 (9956)	178.122	1.11	3.54965	0.00139	2.53259	0	0	0	4.38658	0	2.53259	Infinity	Infinity
184.1/13.5 (10238)	184.074	13.5	3.54965	0.00139	1.09928	0	0	0	1.904	0	1.09928	Infinity	Infinity
233.2/14.4 (13629)	233.191	14.35	3.54965	0.00139	0.460979	0	0	0	0.798438	0	0.460979	Infinity	Infinity
274.1/4.0 (17043)	274.123	4.02	3.54965	0.00139	4.79691	0	0	0	8.3085	0	4.79691	Infinity	Infinity
289.1/6.5 (18505)	289.105	6.54	3.54965	0.00139	1.33677	0	0	0	2.31535	0	1.33677	Infinity	Infinity
294.2/12.5 (19026)	294.24	12.53	3.54965	0.00139	0.194131	0	0	0	0.336245	0	0.194131	Infinity	Infinity
306.2/3.3 (20113)	306.166	3.27	3.54965	0.00139	0.967606	0	0	0	1.67594	0	0.967606	Infinity	Infinity
337.1/3.4 (24270)	337.117	3.45	3.54965	0.00139	1.33498	0	0	0	2.31225	0	1.33498	Infinity	Infinity
338.3/13.1 (24586)	338.345	13.06	3.54965	0.00139	0.538644	0	0	0	0.932959	0	0.538644	Infinity	Infinity
339.8/4.1 (24792)	339.815	4.1	3.54965	0.00139	13.4313	0	0	0	23.2636	0	13.4313	Infinity	Infinity
360.1/3.4 (28263)	360.122	3.38	3.54965	0.00139	0.825147	0	0	0	1.4292	0	0.825147	Infinity	Infinity
371.1/1.1 (29775)	371.101	1.08	3.54965	0.00139	5.94221	0	0	0	10.2922	0	5.94221	Infinity	Infinity
387.2/12.3 (32000)	387.183	12.34	3.54965	0.00139	9.92005	0	0	0	17.182	0	9.92005	Infinity	Infinity
391.3/1.0 (32628)	391.287	1	3.54965	0.00139	3.31658	0	0	0	5.74449	0	3.31658	Infinity	Infinity
395.2/4.6 (33157)	395.227	4.6	3.54965	0.00139	4.22959	0	0	0	7.32587	0	4.22959	Infinity	Infinity
450.2/5.6 (40879)	450.199	5.58	3.54965	0.00139	2.01941	0	0	0	3.49772	0	2.01941	Infinity	Infinity
484.2/1.1 (45640)	484.243	1.13	3.54965	0.00139	70.5774	0	0	0	122.244	0	70.5774	Infinity	Infinity
509.3/13.5 (49142)	509.288	13.49	3.54965	0.00139	1.30633	0	0	0	2.26263	0	1.30633	Infinity	Infinity
519.2/1.1 (50436)	519.227	1.12	3.54965	0.00139	0.399961	0	0	0	0.692753	0	0.399961	Infinity	Infinity
539.4/14.5 (53003)	539.397	14.47	3.54965	0.00139	1.50478	0	0	0	2.60635	0	1.50478	Infinity	Infinity
553.3/1.1 (54757)	553.306	1.1	3.54965	0.00139	1.89834	0	0	0	3.28802	0	1.89834	Infinity	Infinity
713.3/1.1 (69493)	713.311	1.11	3.54965	0.00139	3.13902	0	0	0	5.43694	0	3.13902	Infinity	Infinity
714.3/1.1 (69549)	714.264	1.1	3.54965	0.00139	2.83223	0	0	0	4.90557	0	2.83223	Infinity	Infinity
787.7/12.4 (73821)	787.671	12.45	3.54965	0.00139	5.76853	0	0	0	9.99139	0	5.76853	Infinity	Infinity
353.1/6.3 (27214)	353.12	6.31	3.54724	0.00139	364.386	0.238107	0	0	631.135	1.23724	364.148	1530.35	3.18479
194.1/4.8 (10810)	194.082	4.8	3.54559	0.0014	37.3262	0.0401722	0	0	64.6508	0.208741	37.286	929.154	2.96809
647.3/4.6 (64447)	647.315	4.59	11.5799	3.4369e-12	230.055	0.252588	182.238	0	121.918	1.31249	229.803	910.791	2.95942
713.3/5.3 (69497)	713.327	5.35	6.76946	2.3708e-07	65.3407	0.0729169	47.9472	0	59.2619	0.378887	65.2678	896.098	2.95236
439.2/1.1 (39305)	439.204	1.11	3.54514	0.0014	206.133	0.245881	0	0	357.033	1.23803	205.887	838.345	2.92342
550.3/4.1 (54331)	550.261	4.06	4.60625	8.1335e-05	359.142	0.429353	174.792	0	478.722	2.23098	358.712	836.472	2.92245
645.3/5.7 (64254)	645.297	5.68	5.41135	9.0186e-06	417.424	0.524913	170.468	0	473.563	2.72753	416.899	795.224	2.90049
553.3/4.4 (54771)	553.338	4.44	3.54366	0.00141	64.4078	0.103744	0	0	111.558	0.379983	64.3041	620.832	2.79297
697.3/6.5 (68352)	697.328	6.51	6.50547	4.7493e-07	51.3756	0.090665	57.9142	0	48.4385	0.471109	51.285	566.654	2.75332
398.4/13.6 (33540)	398.363	13.62	3.5387	0.00143	1.01286	0.00270289	0	0	1.75433	0.0140446	1.01016	374.733	2.57372
349.1/3.0 (26386)	349.058	2.98	4.41687	0.00014	27.763	0.0760739	11.5584	0	38.5131	0.395292	27.6869	364.948	2.56223
421.2/1.1 (36701)	421.17	1.11	3.53699	0.00143	53.2373	0.161353	0	0	92.2098	0.838413	53.076	329.944	2.51844
100.1/2.8 (5736)	100.077	2.82	3.53611	0.00143	311.837	1.00193	0	0	540.117	5.20616	310.835	311.237	2.49309
480.3/14.3 (45063)	480.312	14.28	3.53553	0.00144	167.386	0.557683	0	0	289.922	2.89781	166.829	300.146	2.47733
335.1/5.2 (23915)	335.11	5.16	3.53478	0.00144	15853.5	59.9317	0	0	27459.1	217.716	15793.6	264.527	2.42247
312.1/4.0 (20702)	312.145	3.99	4.48596	0.00011	15.6246	0.0610893	6.98767	0	21.2996	0.317429	15.5635	255.767	2.40784
550.3/4.4 (54332)	550.261	4.38	8.9017	1.176e-09	1706.08	6.78797	1749.09	0	1171.42	20.0766	1699.29	251.339	2.40026
576.3/6.3 (57398)	576.276	6.32	3.53231	0.00145	44.8678	0.193121	0	0	77.7133	0.736995	44.6747	232.33	2.36611
466.2/4.4 (43160)	466.248	4.37	3.54512	0.0014	43.2939	0.189753	0.367321	0	74.6693	0.985984	43.1041	228.159	2.35824
504.3/7.0 (48374)	504.255	6.99	4.82133	4.5202e-05	110.435	0.510959	63.6205	0	139.848	2.65502	109.924	216.133	2.33472
714.5/6.0 (69597)	714.481	6.02	3.70777	0.00091	60.6756	0.316275	5.9546	0	99.9807	1.27782	60.3593	191.844	2.28295
342.2/5.7 (25360)	342.242	5.69	3.52536	0.00148	6887.59	39.6766	0	0	11929.6	154.395	6847.91	173.593	2.23953
332.2/3.5 (23448)	332.158	3.53	5.85117	2.7334e-06	63.5897	0.401501	58.4999	0	66.2813	1.07949	63.1882	158.38	2.1997
645.3/4.3 (64255)	645.298	4.33	6.76016	2.4292e-07	170.298	1.16977	127.056	0	153.226	3.73696	169.128	145.582	2.16311
115.1/3.2 (6239)	115.056	3.24	6.57108	3.9934e-07	46.5547	0.346406	54.9629	0	42.972	1.31894	46.2083	134.393	2.12838
532.3/3.6 (52137)	532.253	3.57	8.58008	2.5221e-09	72.5144	0.558555	77.2513	0	51.1956	1.69938	71.9559	129.825	2.11336
636.2/1.1 (63499)	636.211	1.11	6.84552	1.9433e-07	12.6639	0.0988598	17.0877	0	11.132	0.513691	12.565	128.099	2.10755
279.1/2.6 (17432)	279.103	2.55	3.51251	0.00153	63.5567	0.537541	0	0	110.083	1.94429	63.0192	118.236	2.07275
487.3/1.1 (46138)	487.326	1.13	3.50946	0.00154	137.707	1.20909	0	0	238.516	4.74527	136.498	113.893	2.0565
389.2/3.4 (32313)	389.206	3.42	3.50478	0.00156	106.003	0.981493	0	0	183.603	4.21789	105.022	108.002	2.03343
681.3/5.6 (67217)	681.303	5.55	12.4015	6.8264e-13	182.858	1.70798	138.561	0	87.6379	5.44101	181.15	107.061	2.02963
647.3/4.2 (64448)	647.317	4.22	3.74931	0.00082	42.6695	0.431904	5.69481	0	69.0327	1.56114	42.2376	98.7941	1.99473
183.1/3.6 (10206)	183.114	3.61	3.49736	0.00159	21.93	0.242427	0	0	37.9839	0.910824	21.6876	90.4603	1.95646
537.4/12.4 (52748)	537.393	12.43	5.0201	2.625e-05	8.83737	0.103633	6.04031	0	10.5186	0.538493	8.73373	85.2756	1.93082
181.1/3.1 (10071)	181.085	3.12	3.47689	0.00167	11.7919	0.142896	0	0	20.4242	0.742507	11.649	82.5212	1.91657
229.1/2.9 (13235)	229.142	2.95	3.48346	0.00165	3.78304	0.046685	0	0	6.55241	0.206329	3.73635	81.0333	1.90866
172.1/1.0 (9562)	172.062	1.03	3.4735	0.00169	11.3364	0.141937	0	0	19.6352	0.737525	11.1944	79.8692	1.90238
375.1/4.7 (30343)	375.134	4.66	3.47191	0.0017	16.4315	0.208779	0	0	28.4603	1.08485	16.2228	78.703	1.89599
339.2/3.7 (24743)	339.207	3.73	4.78463	4.9973e-05	13.1205	0.170916	7.75564	0	16.4718	0.654633	12.9496	76.7659	1.88517
250.2/12.5 (14888)	250.171	12.48	3.46844	0.00171	3.6614	0.0479908	0	0	6.34173	0.249367	3.61341	76.2939	1.88249
304.2/3.0 (19926)	304.189	3	3.49011	0.00162	48.1662	0.635088	0	0	83.4263	1.97823	47.5311	75.8418	1.87991
611.2/12.5 (61124)	611.24	12.54	3.46513	0.00173	13.6464	0.184002	0	0	23.6363	0.9561	13.4624	74.1647	1.8702
118.0/1.3 (6403)	117.992	1.26	3.47841	0.00167	5.56412	0.0766253	0	0	9.63733	0.303522	5.48749	72.6146	1.86102
263.1/9.5 (16013)	263.122	9.48	6.86269	1.8582e-07	36.803	0.54843	53.2776	0	31.9305	1.64977	36.2545	67.1061	1.82676
386.0/2.1 (31808)	385.969	2.12	3.47468	0.00168	20.1487	0.300666	0	0	34.8986	1.09082	19.8481	67.0137	1.82616
611.3/3.5 (61129)	611.256	3.54	5.08953	2.1712e-05	10.5095	0.172692	7.85109	0	12.0605	0.897335	10.3368	60.8568	1.78431
156.0/14.5 (8526)	156.045	14.49	3.43742	0.00185	1.07421	0.0176547	0	0	1.86058	0.0917363	1.05655	60.8455	1.78423
651.3/4.6 (64759)	651.314	4.56	5.70385	4.0721e-06	19.6428	0.338726	19.2999	0	19.8165	1.76007	19.3041	57.9901	1.76335
359.2/1.0 (28210)	359.24	1.01	3.42909	0.00189	10.7114	0.184921	0	0	18.5527	0.96088	10.5265	57.9242	1.76286
229.0/1.2 (13172)	229.024	1.19	3.4539	0.00178	42.0105	0.755115	0	0	72.7644	2.75122	41.2554	55.6346	1.74535
380.2/3.4 (31001)	380.154	3.43	3.41394	0.00197	17.5531	0.328555	0	0	30.4028	1.70722	17.2245	53.425	1.72774
321.1/1.1 (21728)	321.088	1.11	3.4292	0.00189	52.4616	0.995883	0	0	90.8662	4.45083	51.4657	52.6785	1.72163
329.3/13.5 (23017)	329.273	13.54	3.44619	0.00181	7.11582	0.136292	0	0	12.325	0.49172	6.97953	52.21	1.71775
445.2/1.1 (40226)	445.187	1.12	9.42072	3.5333e-10	216.988	4.17932	154.14	0	114.708	21.7164	212.809	51.9195	1.71533
691.3/1.1 (67955)	691.292	1.12	3.40628	0.00201	21.5429	0.418538	0	0	37.3135	2.17479	21.1244	51.4719	1.71157
609.4/7.9 (60969)	609.402	7.93	3.66887	0.00101	30.5935	0.609487	3.78645	0	49.7464	1.96068	29.9841	50.1955	1.70067
322.1/3.5 (21886)	322.144	3.47	3.42888	0.0019	4.4457	0.0886982	0	0	7.70019	0.365845	4.35701	50.1217	1.70003
400.2/13.3 (33826)	400.237	13.26	3.40029	0.00204	1.22651	0.0244982	0	0	2.12437	0.127296	1.20201	50.0652	1.69954
318.9/3.4 (21457)	318.908	3.38	3.74291	0.00083	5.23711	0.107191	1.04373	0	8.1837	0.556982	5.12992	48.8576	1.68893
418.2/1.1 (36367)	418.198	1.1	3.41208	0.00198	142.516	3.00747	0	0	246.845	13.181	139.508	47.3874	1.67566
474.3/7.3 (44256)	474.262	7.3	5.28232	1.2822e-05	13.2881	0.282128	11.6384	0	14.185	1.46598	13.0059	47.0995	1.67302
314.2/2.6 (20920)	314.162	2.64	3.42787	0.0019	7.29709	0.156274	0	0	12.6389	0.574707	7.14082	46.6941	1.66926
713.3/1.2 (69489)	713.282	1.16	5.60016	5.3954e-06	3.76155	0.0816213	3.80615	0	3.73946	0.424117	3.67993	46.0855	1.66356
407.9/1.2 (34817)	407.942	1.17	3.38484	0.00212	49.0212	1.08223	0	0	84.9072	5.35612	47.939	45.2963	1.65606
324.2/3.4 (22179)	324.18	3.42	3.41736	0.00195	11.6435	0.265784	0	0	20.1671	0.972469	11.3777	43.8079	1.64155
312.1/3.5 (20700)	312.144	3.45	3.36481	0.00224	1.86149	0.0429091	0	0	3.2242	0.222962	1.81858	43.3822	1.63731
360.2/4.7 (28311)	360.204	4.74	5.25996	1.3629e-05	491.529	11.4443	419.195	0	531.401	50.0041	480.085	42.9498	1.63296
679.3/4.5 (67065)	679.302	4.45	4.45217	0.00012	14.4118	0.343306	7.59839	0	18.7701	1.39007	14.0685	41.9795	1.62304
380.2/3.7 (31013)	380.169	3.74	3.35518	0.00229	17.8347	0.425295	0	0	30.8906	2.2099	17.4094	41.9349	1.62258
182.0/1.1 (10117)	182.031	1.14	3.40057	0.00204	27.4441	0.672259	0	0	47.5345	2.53149	26.7718	40.8236	1.61091
483.3/3.8 (45526)	483.262	3.76	4.96448	3.0562e-05	12.8172	0.321052	10.2756	0	14.2588	1.66824	12.4961	39.9224	1.60122
143.0/1.3 (7756)	143.005	1.26	3.364	0.00224	15.457	0.389316	0	0	26.7724	1.78883	15.0677	39.7031	1.59882
170.0/2.1 (9421)	170.032	2.11	4.54891	9.51e-05	8.30814	0.209335	5.205	0	10.2194	1.08773	8.0988	39.6883	1.59866
377.1/4.4 (30614)	377.148	4.41	3.4431	0.00183	257.132	6.74788	7.11919	0	439.215	23.1842	250.384	38.1056	1.58099
341.1/3.4 (25093)	341.148	3.35	4.13135	0.0003	4.23714	0.113378	1.82915	0	5.82707	0.533961	4.12376	37.3718	1.57254
214.1/3.3 (12086)	214.051	3.35	5.21541	1.5393e-05	4.07095	0.109544	3.83343	0	4.19475	0.569206	3.9614	37.1627	1.57011
211.9/1.2 (11943)	211.946	1.23	3.33719	0.0024	32.4218	0.882221	0	0	56.1563	4.13976	31.5396	36.7503	1.56526
774.4/6.5 (73159)	774.42	6.54	6.14615	1.2362e-06	8.741	0.238538	11.2731	0	7.78995	0.946894	8.50246	36.644	1.564
353.2/3.4 (27283)	353.168	3.38	3.33341	0.00242	8.52446	0.239568	0	0	14.7648	1.09198	8.2849	35.5827	1.55124
188.0/1.2 (10479)	187.996	1.17	3.39178	0.00209	33.5408	0.942621	0	0	58.0944	2.99542	32.5982	35.5825	1.55124
469.9/1.3 (43662)	469.949	1.28	3.31341	0.00255	10.704	0.300886	0	0	18.5399	1.49085	10.4031	35.5749	1.55114
408.9/3.8 (34941)	408.913	3.8	10.8941	1.4063e-11	84.8462	2.40461	84.8786	0	11.6263	12.4947	82.4416	35.2847	1.54759
537.4/13.3 (52750)	537.394	13.28	5.90988	2.3328e-06	15.1885	0.436375	17.3875	0	14.2171	1.60291	14.7521	34.8061	1.54166
538.2/3.8 (52802)	538.176	3.81	3.29993	0.00264	31.0242	0.909941	0	0	53.7355	4.47596	30.1142	34.0947	1.53269
478.3/13.7 (44780)	478.298	13.7	3.37007	0.00221	149.874	4.45242	0	0	259.589	15.1832	145.422	33.6612	1.52713
468.2/1.1 (43374)	468.157	1.12	3.27929	0.00278	4.05592	0.124873	0	0	7.02506	0.618131	3.93105	32.4804	1.51162
668.4/4.4 (66266)	668.365	4.35	4.87682	3.884e-05	15.0557	0.474579	13.1576	0	16.089	2.46599	14.5811	31.7243	1.50139
771.5/14.4 (73001)	771.465	14.37	3.25085	0.00299	11.527	0.365772	0	0	19.9653	1.90061	11.1612	31.514	1.4985
326.2/3.4 (22396)	326.157	3.35	4.93814	3.2845e-05	7.12662	0.227714	5.53895	0	8.03891	0.839126	6.8989	31.2964	1.49549
478.2/3.4 (44746)	478.245	3.42	5.43939	8.3552e-06	3.38212	0.108855	4.09838	0	3.08695	0.565627	3.27326	31.0699	1.49234
442.2/1.1 (39792)	442.226	1.13	3.23905	0.00308	7.39878	0.240907	0	0	12.8151	1.25179	7.15787	30.7122	1.48731
575.3/10.9 (57323)	575.309	10.87	3.90983	0.00053	52.7088	1.73804	14.8034	0	78.8225	4.03058	50.9708	30.3266	1.48182
428.2/3.4 (37697)	428.154	3.41	7.71106	2.121e-08	7.28043	0.242328	7.88553	0	3.29825	1.25917	7.0381	30.0438	1.47775
683.7/8.2 (67404)	683.695	8.24	4.30509	0.00018	6.36215	0.214006	3.31666	0	8.31432	0.782763	6.14815	29.7289	1.47318
343.2/1.9 (25487)	343.197	1.91	4.53714	9.8199e-05	58.1613	1.96759	35.756	0	72.0268	6.85262	56.1937	29.5597	1.4707
316.2/3.7 (21153)	316.177	3.7	3.26188	0.00291	4.87607	0.166133	0	0	8.4456	0.758685	4.70994	29.3505	1.46761
236.2/12.9 (13770)	236.16	12.94	3.21301	0.00329	0.432088	0.0148447	0	0	0.748398	0.0771354	0.417243	29.1072	1.464
301.2/3.8 (19621)	301.176	3.83	6.12487	1.3087e-06	22.8589	0.793602	32.255	0	16.4173	4.12368	22.0653	28.804	1.45945
301.1/1.1 (19542)	301.072	1.13	3.27362	0.00282	14.3104	0.504762	0	0	24.7864	2.11068	13.8056	28.3508	1.45257
764.2/8.0 (72585)	764.153	7.99	5.23565	1.4565e-05	29.402	1.03967	27.5749	0	30.3568	3.80006	28.3623	28.2801	1.45148
674.3/1.1 (66661)	674.296	1.12	3.19731	0.00343	19.8355	0.702548	0	0	34.3561	3.65055	19.1329	28.2336	1.45077
314.2/3.3 (20921)	314.163	3.29	4.45787	0.00012	29.5085	1.05022	21.896	0	33.9609	5.45709	28.4583	28.0976	1.44867
794.5/7.2 (74182)	794.474	7.23	3.29748	0.00266	18.6803	0.669528	0	0	32.3553	2.4936	18.0108	27.9008	1.44562
456.9/2.1 (41837)	456.857	2.12	4.24169	0.00022	9.21009	0.344196	5.0034	0	11.8855	1.35524	8.86589	26.7583	1.42746
692.3/9.5 (68014)	692.254	9.55	3.56084	0.00135	28.4774	1.07169	5.15738	0	44.9319	4.11561	27.4057	26.5724	1.42443
252.0/1.7 (15037)	252.042	1.74	3.24501	0.00304	12.3557	0.474073	0	0	21.4007	1.93708	11.8816	26.0629	1.41602
348.2/2.8 (26286)	348.18	2.78	3.28581	0.00274	16.8962	0.662228	0	0	29.2651	2.25737	16.234	25.5142	1.40678
360.1/3.3 (28260)	360.12	3.27	3.13518	0.00401	4.57368	0.180684	0	0	7.92184	0.93886	4.39299	25.3132	1.40335
152.0/1.3 (8360)	152.018	1.27	3.25626	0.00295	1.99639	0.0801967	0	0	3.45785	0.295223	1.91619	24.8936	1.39609
518.2/4.0 (50308)	518.233	3.95	3.99698	0.00042	55.8491	2.33822	30.8501	0	71.6955	11.2141	53.5109	23.8854	1.37813
239.1/3.7 (13989)	239.088	3.72	3.17793	0.0036	12.0765	0.511282	0	0	20.9171	2.20309	11.5652	23.62	1.37328
197.1/1.0 (10973)	197.086	1	4.79607	4.8433e-05	6.915	0.294705	7.99006	0	6.44507	1.53133	6.62029	23.4642	1.3704
476.2/1.1 (44488)	476.225	1.11	3.07597	0.00465	116.362	5.03397	0	0	201.545	26.1573	111.328	23.1153	1.3639
366.9/1.3 (29190)	366.935	1.27	3.16194	0.00375	20.424	0.896104	0	0	35.3753	3.82652	19.5279	22.7919	1.35778
659.4/4.7 (65557)	659.363	4.65	3.0708	0.00471	20.8984	0.919125	0	0	36.1971	4.72205	19.9793	22.7373	1.35674
679.3/4.8 (67061)	679.298	4.78	3.19634	0.00344	9.79021	0.434302	0	0	16.9571	1.67139	9.3559	22.5424	1.353
303.1/3.5 (19783)	303.106	3.54	4.22102	0.00023	13.2799	0.590666	9.53134	0	15.498	2.79312	12.6892	22.4829	1.35185
349.2/3.1 (26454)	349.153	3.09	3.21278	0.0033	7.35957	0.329991	0	0	12.7471	1.19204	7.02958	22.3023	1.34835
366.2/1.1 (29110)	366.188	1.12	4.85235	4.1527e-05	209.145	9.42744	307.95	0	181.216	48.9864	199.717	22.1847	1.34605
516.2/8.1 (50011)	516.185	8.11	3.04981	0.00496	109.839	4.97466	0	0	190.247	25.5636	104.865	22.0798	1.34399
118.1/1.8 (6457)	118.087	1.84	4.21938	0.00023	4.79977	0.218171	3.94647	0	5.2784	1.13365	4.5816	22.0001	1.34242
141.0/1.3 (7652)	141.007	1.27	3.03329	0.00517	29.6611	1.3617	0	0	51.3746	7.07559	28.2994	21.7825	1.33811
401.1/3.2 (33915)	401.15	3.19	5.0807	2.2242e-05	5.09972	0.235092	7.26586	0	4.43313	1.0742	4.86463	21.6925	1.33631
667.3/1.1 (66153)	667.266	1.11	3.25289	0.00298	30.5625	1.42075	0	0	52.9358	4.2207	29.1417	21.5115	1.33267
791.5/8.2 (74063)	791.488	8.2	6.42047	5.9488e-07	50.2879	2.34244	42.5601	0	13.4895	12.1717	47.9455	21.4682	1.33179
367.2/1.0 (29285)	367.233	1.04	4.50369	0.00011	4.25747	0.200245	4.65182	0	4.07464	1.0405	4.05723	21.2614	1.32759
401.3/4.5 (34006)	401.287	4.54	3.17592	0.00362	10.9725	0.517134	0	0	19.0049	1.93112	10.4554	21.2179	1.3267
186.1/6.9 (10361)	186.089	6.86	5.43976	8.3467e-06	24.3219	1.14831	34.5383	0	21.153	4.28364	23.1736	21.1806	1.32594
609.3/4.4 (60915)	609.286	4.35	6.34162	7.3355e-07	14.1415	0.672242	18.6685	0	10.1424	2.28124	13.4693	21.0364	1.32297
209.1/2.2 (11762)	209.093	2.23	3.07976	0.00461	41.2688	1.96942	0	0	71.4796	8.96867	39.2993	20.9548	1.32128
501.8/6.1 (48075)	501.802	6.13	3.849	0.00063	11.9147	0.571257	7.51358	0	14.6209	2.96834	11.3435	20.8571	1.31925
423.2/2.7 (36975)	423.196	2.71	7.70757	2.1396e-08	50.9273	2.44317	38.4292	0	29.3029	7.00045	48.4842	20.8448	1.319
388.3/3.5 (32212)	388.253	3.46	6.08898	1.4409e-06	10.7754	0.517509	11.6678	0	3.64366	2.68906	10.2579	20.8216	1.31851
540.3/6.1 (53090)	540.306	6.07	3.00296	0.00558	37.5415	1.80364	0	0	65.0237	9.30484	35.7378	20.8142	1.31836
113.0/1.4 (6055)	112.988	1.41	3.03304	0.00518	22.3956	1.08206	0	0	38.7903	5.27616	21.3135	20.6972	1.31591
358.2/14.2 (28044)	358.204	14.24	2.99264	0.00572	17.5553	0.849586	0	0	30.4067	4.41458	16.7057	20.6634	1.3152
206.0/2.2 (11606)	205.975	2.15	3.48373	0.00164	13.4004	0.66184	3.79041	0	20.0175	2.83805	12.7386	20.2472	1.30636
452.2/8.7 (41167)	452.189	8.71	3.00395	0.00556	72.4422	3.60179	0	0	125.474	17.7762	68.8404	20.1128	1.30347
409.2/3.5 (35026)	409.229	3.5	2.99098	0.00574	41.5647	2.0755	0	0	71.9922	10.4003	39.4892	20.0263	1.3016
345.2/2.5 (25783)	345.167	2.53	3.15936	0.00377	30.5007	1.54591	1.44673	0	51.5809	6.29003	28.9548	19.7299	1.29512
289.1/6.1 (18503)	289.105	6.13	4.93875	3.279e-05	43.7066	2.22627	49.2496	0	41.2156	8.62812	41.4804	19.6322	1.29297
349.1/4.7 (26446)	349.147	4.67	2.9433	0.00646	1.14857	0.0590114	0	0	1.98939	0.306632	1.08956	19.4636	1.28922
416.1/3.6 (36036)	416.095	3.57	3.89231	0.00056	13.2271	0.687105	10.0723	0	15.0546	3.5703	12.54	19.2505	1.28444
411.0/1.0 (35260)	410.971	1.05	3.10863	0.00429	40.6611	2.11817	0	0	70.427	8.09052	38.5429	19.1963	1.28322
378.2/4.6 (30782)	378.215	4.63	3.10494	0.00433	58.3127	3.08929	9.64132	0	92.7762	16.0524	55.2234	18.8757	1.2759
311.2/3.3 (20615)	311.172	3.34	3.08195	0.00458	6.56527	0.352407	0	0	11.3714	1.3673	6.21286	18.6298	1.27021
469.1/1.1 (43536)	469.139	1.12	5.05886	2.3611e-05	41.3749	2.22619	45.9147	0	39.3021	7.43721	39.1487	18.5855	1.26917
425.1/6.3 (37264)	425.106	6.34	2.95919	0.00621	38.5738	2.08542	0	0	66.8118	9.93589	36.4884	18.4969	1.2671
162.0/1.0 (8957)	161.981	1.05	2.8922	0.00732	56.193	3.0592	0	0	97.329	15.8961	53.1338	18.3685	1.26407
521.3/3.5 (50731)	521.28	3.54	4.54795	9.5349e-05	1170.28	63.7218	1715.1	0	1014.3	304.953	1106.56	18.3655	1.264
540.2/1.1 (53043)	540.207	1.11	3.98886	0.00043	98.1056	5.36543	91.3922	0	101.629	27.8796	92.7402	18.2848	1.26209
682.4/7.6 (67302)	682.361	7.64	3.34158	0.00237	80.0584	4.38703	7.29282	0	129.68	14.0532	75.6714	18.2489	1.26124
430.2/13.3 (38082)	430.224	13.25	2.88431	0.00746	1.43384	0.0787354	0	0	2.48349	0.409121	1.35511	18.2109	1.26033
561.7/4.6 (55792)	561.72	4.65	4.71561	6.0342e-05	14.9885	0.827426	18.9443	0	13.4541	3.50684	14.1611	18.1146	1.25803
121.0/1.3 (6610)	120.955	1.26	2.95145	0.00633	16.5796	0.921921	1.2188	0	27.668	4.79044	15.6577	17.9838	1.25488
457.3/14.0 (41950)	457.284	14.01	2.86316	0.00786	14.3474	0.805946	0	0	24.8505	4.18782	13.5415	17.802	1.25047
252.0/1.2 (15034)	252.038	1.19	3.9494	0.00048	142.259	8.0453	59.5435	0	197.095	19.2304	134.213	17.6822	1.24754
514.2/5.0 (49743)	514.245	4.95	3.01396	0.00543	2.73593	0.155108	0	0	4.73877	0.636103	2.58082	17.6389	1.24647
400.1/1.0 (33742)	400.086	1.01	4.89446	3.7011e-05	35.3058	2.01652	41.6704	0	32.593	7.26584	33.2893	17.5083	1.24324
102.0/1.2 (5773)	101.978	1.22	3.13854	0.00398	38.7915	2.25162	1.30088	0	66.0654	7.64044	36.5398	17.2282	1.23624
358.2/4.7 (27981)	358.152	4.72	4.1106	0.00031	164.219	9.69132	231.284	0	143.011	50.3576	154.528	16.945	1.22904
247.1/2.6 (14671)	247.131	2.58	3.0224	0.00531	43.5807	2.57549	0	0	75.484	9.84445	41.0052	16.9213	1.22843
578.3/1.1 (57633)	578.275	1.12	4.78679	4.9678e-05	116.922	7.05194	134.238	0	49.5875	36.6429	109.87	16.5801	1.21959
124.0/1.1 (6767)	124.039	1.1	7.8435	1.5236e-08	24.0578	1.45204	22.5968	0	3.86641	4.79612	22.6058	16.5682	1.21928
242.2/3.8 (14187)	242.153	3.83	3.4566	0.00176	21.0676	1.27349	6.61043	0	30.9423	4.6585	19.7941	16.5431	1.21862
378.1/2.9 (30710)	378.131	2.92	3.58896	0.00125	16.7851	1.01893	7.44248	0	22.9313	3.95774	15.7662	16.4733	1.21678
544.3/13.4 (53616)	544.348	13.43	2.88805	0.0074	22.718	1.38373	0	0	39.3487	6.29029	21.3343	16.418	1.21532
784.6/14.5 (73654)	784.581	14.45	4.02379	0.00039	3.98647	0.242882	5.67361	0	3.46593	1.26205	3.74359	16.4132	1.21519
676.3/7.6 (66834)	676.345	7.6	2.98109	0.00589	15.0971	0.921828	0	0	26.1489	3.62589	14.1752	16.3773	1.21424
254.0/3.4 (15195)	254.03	3.39	5.51698	6.7644e-06	4.59502	0.280592	3.79136	0	3.084	1.02305	4.31443	16.3762	1.21421
442.2/3.9 (39778)	442.204	3.93	3.00826	0.0055	0.877594	0.0537825	0	0	1.52004	0.200815	0.823812	16.3175	1.21265
400.2/3.4 (33790)	400.214	3.42	3.04382	0.00504	7.8277	0.483756	0	0	13.558	1.66934	7.34395	16.1811	1.20901
407.1/4.6 (34686)	407.12	4.63	3.50032	0.00158	9.10683	0.563724	3.5045	0	12.8585	2.14527	8.5431	16.1548	1.2083
506.2/3.4 (48599)	506.183	3.44	3.1424	0.00394	71.7243	4.46636	14.6279	0	111.801	19.249	67.2579	16.0588	1.20571
659.4/4.9 (65559)	659.364	4.88	3.42866	0.0019	48.2888	3.03813	15.1871	0	70.8941	10.9476	45.2507	15.8942	1.20124
625.8/7.1 (62616)	625.842	7.09	4.75861	5.3655e-05	63.8253	4.02962	53.8098	0	65.2955	11.4525	59.7956	15.839	1.19973
560.1/3.3 (55572)	560.078	3.26	4.7664	5.2524e-05	14.014	0.887281	19.4221	0	12.2413	3.24446	13.1267	15.7943	1.1985
255.0/1.0 (15278)	254.976	1.03	2.9003	0.00718	68.8884	4.36363	9.72373	0	111.004	22.1665	64.5247	15.7869	1.1983
131.1/2.0 (7182)	131.073	1.99	2.97858	0.00592	1.09085	0.0691211	0	0	1.8894	0.25987	1.02173	15.7817	1.19815
622.3/14.3 (62328)	622.323	14.32	6.79947	2.1917e-07	16.8138	1.07778	16.4283	0	0.778961	3.94043	15.7361	15.6005	1.19314
348.1/4.7 (26245)	348.147	4.71	2.98803	0.00579	123.516	7.93536	0	0	213.936	28.8086	115.581	15.5653	1.19216
403.2/3.9 (34225)	403.154	3.87	4.47418	0.00012	23.5298	1.5157	24.988	0	17.4512	6.85315	22.0141	15.5241	1.19101
488.3/1.1 (46237)	488.254	1.14	4.75235	5.4581e-05	291.936	18.9264	361.9	0	264.002	65.0744	273.01	15.4248	1.18822
772.8/6.1 (73063)	772.8	6.06	6.24543	9.4794e-07	36.1136	2.3421	41.005	0	11.5318	8.64821	33.7715	15.4194	1.18807
388.2/4.0 (32195)	388.219	4.05	2.97653	0.00595	6.12526	0.398925	0	0	10.6093	1.45035	5.72634	15.3544	1.18623
577.3/10.9 (57554)	577.325	10.87	3.91367	0.00053	136.805	8.91596	47.3821	0	178.983	25.3109	127.889	15.3438	1.18593
402.9/1.6 (34198)	402.935	1.61	4.26544	0.00021	22.1863	1.44708	28.521	0	19.7944	6.21286	20.7392	15.3318	1.18559
591.3/4.3 (58996)	591.253	4.25	2.95668	0.00625	6.73897	0.441031	0	0	11.6722	1.64703	6.29794	15.28	1.18412
647.3/4.4 (64443)	647.312	4.37	3.02367	0.0053	28.4658	1.86318	0	0	49.3042	6.17107	26.6026	15.278	1.18407
159.1/3.0 (8758)	159.094	3.03	3.07546	0.00466	16.1374	1.05898	2.41886	0	25.8842	4.28439	15.0784	15.2386	1.18295
562.3/4.2 (55860)	562.291	4.16	3.34376	0.00236	9.55291	0.628432	6.44225	0	11.4302	3.26543	8.92448	15.2012	1.18188
281.1/3.0 (17693)	281.115	2.98	2.97194	0.00602	100.423	6.61596	0	0	173.938	23.868	93.8073	15.1789	1.18124
162.0/2.7 (8944)	161.973	2.73	3.06005	0.00484	6.41284	0.42409	0	0	11.1074	1.2832	5.98875	15.1214	1.17959
389.0/1.0 (32264)	388.999	1.05	2.94241	0.00647	39.8414	2.64952	0	0	69.0073	9.91193	37.1919	15.0372	1.17717
349.1/3.4 (26431)	349.128	3.39	3.2072	0.00334	72.5237	4.87003	11.8614	0	115.495	16.3631	67.6537	14.8918	1.17295
569.3/3.0 (56618)	569.291	3.03	6.04218	1.6339e-06	30.0293	2.0193	29.5723	0	6.5586	7.69272	28.01	14.8712	1.17235
354.1/4.3 (27441)	354.145	4.25	2.81894	0.00875	2.51658	0.169596	0	0	4.35884	0.744355	2.34698	14.8386	1.17139
372.9/1.3 (30033)	372.922	1.26	2.81554	0.00882	12.5012	0.850003	0	0	21.6526	3.70512	11.6512	14.7072	1.16753
227.1/2.7 (12985)	227.105	2.68	2.90856	0.00703	22.2652	1.51624	3.71011	0	35.4001	7.18172	20.749	14.6845	1.16686
789.4/4.4 (73936)	789.426	4.36	2.90319	0.00713	15.5617	1.06392	0	0	26.9536	4.0775	14.4978	14.6268	1.16515
348.0/1.4 (26208)	347.964	1.37	3.33022	0.00244	22.3858	1.55095	6.18326	0	33.5613	5.21234	20.8349	14.4337	1.15938
291.0/1.0 (18659)	291.022	1.05	2.81883	0.00875	78.5946	5.45001	0	0	136.13	23.0727	73.1446	14.421	1.159
614.2/12.4 (61406)	614.243	12.41	4.17825	0.00026	19.1748	1.34921	16.2066	0	20.8182	4.42548	17.8255	14.2119	1.15265
330.2/5.1 (23191)	330.242	5.14	2.85661	0.00798	26.3819	1.891	0	0	45.6948	7.28758	24.4909	13.9513	1.14462
515.4/13.0 (49957)	515.417	13.03	2.90026	0.00718	6.25878	0.449009	0	0	10.8405	1.62115	5.80977	13.9391	1.14423
157.1/1.9 (8578)	157.077	1.88	3.75067	0.00082	13.2116	0.973302	5.27241	0	18.5058	2.14813	12.2383	13.574	1.13271
494.3/1.1 (47115)	494.306	1.12	2.80802	0.00898	6.89722	0.513192	0	0	11.9463	2.01275	6.38403	13.4399	1.12839
419.2/3.0 (36472)	419.183	3.02	3.61051	0.00118	15.4033	1.14657	18.3826	0	14.1509	5.47114	14.2568	13.4342	1.12821
430.2/1.1 (38039)	430.16	1.11	2.85251	0.00806	23.0894	1.72752	0	0	39.9921	6.32788	21.3619	13.3657	1.12599
322.1/3.9 (21877)	322.138	3.88	2.90444	0.00711	11.0194	0.830627	0	0	19.0862	2.7858	10.1888	13.2664	1.12275
587.2/4.4 (58572)	587.164	4.43	3.4239	0.00192	11.2453	0.84949	16.2879	0	9.75602	4.41408	10.3959	13.2378	1.12181
480.3/12.3 (45049)	480.283	12.26	3.36591	0.00223	25.9002	1.96793	11.188	0	35.6134	7.03101	23.9322	13.1611	1.11929
256.1/7.3 (15377)	256.121	7.33	4.04981	0.00037	6.32738	0.481697	4.76032	0	7.23926	1.42372	5.84569	13.1356	1.11845
309.1/6.6 (20393)	309.129	6.63	5.97637	1.9502e-06	45720.8	3489.26	45703	0	74.0439	12049.6	42231.6	13.1033	1.11738
379.2/1.1 (30899)	379.198	1.1	3.38745	0.00211	140.718	10.7758	207.443	0	121.919	55.9928	129.942	13.0587	1.1159
204.0/1.2 (11465)	203.999	1.25	2.84091	0.00829	8.70074	0.667103	0	0	15.0701	2.40457	8.03363	13.0426	1.11536
354.2/2.0 (27477)	354.169	2.01	2.8927	0.00731	20.8447	1.59844	1.82837	0	34.5328	6.08153	19.2463	13.0407	1.1153
453.1/1.1 (41289)	453.087	1.11	2.78512	0.00949	18.1149	1.39056	0	0	31.3759	5.3964	16.7243	13.0271	1.11485
209.1/5.0 (11791)	209.128	5	3.52631	0.00147	34.3795	2.64076	44.6724	0	24.7878	13.7218	31.7387	13.0188	1.11457
274.1/3.5 (17027)	274.098	3.46	2.78817	0.00942	2.41878	0.187975	0	0	4.18944	0.715021	2.2308	12.8675	1.1095
441.2/2.9 (39612)	441.19	2.9	2.95552	0.00627	24.871	1.94291	0	0	43.0778	5.67847	22.9281	12.8009	1.10724
550.3/4.8 (54356)	550.292	4.81	2.76367	0.00999	8.32328	0.653133	0	0	14.4163	2.53173	7.67015	12.7436	1.10529
616.3/13.6 (61676)	616.34	13.63	3.31406	0.00255	15.887	1.2476	22.4278	0	13.8299	6.48269	14.6394	12.7341	1.10497
537.4/14.5 (52755)	537.397	14.48	4.57534	8.8489e-05	139.823	11.0045	147.473	0	136.159	29.6451	128.818	12.706	1.10401
654.0/1.6 (64956)	653.969	1.57	4.32971	0.00017	15.2577	1.20141	19.8662	0	13.5543	4.06368	14.0563	12.6998	1.1038
328.1/2.3 (22765)	328.137	2.26	3.25893	0.00293	6.09684	0.480609	7.32661	0	5.58445	2.49732	5.61623	12.6856	1.10331
394.2/1.1 (33001)	394.222	1.12	2.92035	0.00683	4.05499	0.320042	2.40217	0	5.08693	1.66299	3.73495	12.6702	1.10278
281.2/4.3 (17730)	281.174	4.31	2.97698	0.00595	11.9053	0.943798	0	0	20.6206	2.59105	10.9615	12.6142	1.10086
316.3/12.9 (21203)	316.32	12.93	3.01	0.00548	13.9349	1.11591	0	0	24.1359	2.81547	12.819	12.4875	1.09648
545.3/1.1 (53707)	545.264	1.12	4.14199	0.00029	149.118	11.9891	219.526	0	129.207	43.6217	137.129	12.4378	1.09474
171.1/3.1 (9519)	171.112	3.13	4.34886	0.00016	105.471	8.49672	102.55	0	8.9741	37.9421	96.974	12.4131	1.09388
612.2/4.3 (61199)	612.191	4.29	4.04974	0.00037	7.08194	0.576291	6.23303	0	7.54231	1.76856	6.50565	12.2888	1.08951
559.3/8.9 (55512)	559.315	8.87	5.0043	2.7409e-05	177.067	14.4176	125.398	0	151.288	36.2078	162.65	12.2813	1.08924
354.2/1.1 (27472)	354.167	1.1	6.92363	1.5855e-07	436.293	35.8396	529.06	0	245.034	71.4743	400.454	12.1735	1.08541
544.3/5.5 (53566)	544.281	5.49	4.40765	0.00014	57.0601	4.69648	52.8201	0	37.8633	17.3236	52.3636	12.1495	1.08456
418.2/3.0 (36344)	418.172	2.97	3.75483	0.00081	8.45731	0.702071	10.4603	0	7.65494	2.81004	7.75524	12.0462	1.08085
272.2/1.1 (16799)	272.161	1.12	3.10834	0.00429	9.54644	0.797626	11.5273	0	8.72628	4.14459	8.74881	11.9686	1.07804
553.2/1.1 (54728)	553.247	1.11	3.51575	0.00151	96.4341	8.09018	81.5037	0	104.701	31.5074	88.3439	11.9199	1.07627
423.2/4.4 (36979)	423.199	4.4	4.53532	9.8687e-05	37.9967	3.20284	50.8944	0	33.4668	9.21836	34.7938	11.8634	1.07421
307.1/3.5 (20190)	307.127	3.48	3.60215	0.00121	39.1187	3.30815	53.8317	0	30.7363	14.6527	35.8106	11.8249	1.0728
337.3/13.7 (24410)	337.277	13.7	3.87465	0.00059	21.6088	1.85391	10.7764	0	28.607	3.55443	19.7549	11.6558	1.06654
450.2/3.8 (40901)	450.212	3.85	2.86399	0.00784	19.2786	1.65574	15.127	0	21.6549	8.6035	17.6228	11.6434	1.06608
660.0/7.1 (65587)	660.012	7.09	4.05245	0.00037	25.5345	2.19373	14.6542	0	22.6527	7.54892	23.3407	11.6397	1.06594
263.1/1.1 (15980)	263.099	1.1	3.9106	0.00053	13.6025	1.17386	20.1302	0	11.7833	4.32317	12.4286	11.5878	1.064
435.2/13.3 (38745)	435.201	13.31	4.14436	0.00029	29.4532	2.54495	41.9437	0	25.605	8.49374	26.9082	11.5732	1.06345
261.1/3.8 (15816)	261.13	3.79	3.92315	0.00052	464.446	40.2123	679.432	0	402.592	146.742	424.234	11.5499	1.06258
705.3/1.1 (68948)	705.297	1.11	3.03376	0.00517	31.8178	2.77581	47.2232	0	27.5596	14.4236	29.042	11.4625	1.05928
548.3/8.4 (54096)	548.288	8.37	3.08524	0.00454	9.22824	0.820004	6.11216	0	6.68858	4.26087	8.40823	11.2539	1.0513
644.3/13.2 (64163)	644.323	13.17	3.63118	0.00112	13.8457	1.24093	19.108	0	12.1051	4.8749	12.6047	11.1574	1.04756
509.5/4.1 (49165)	509.544	4.13	3.82056	0.00068	27.084	2.45172	38.1008	0	23.591	8.83493	24.6323	11.047	1.04324
452.2/9.5 (41162)	452.183	9.47	3.50866	0.00154	69.802	6.37641	89.285	0	62.3855	25.5103	63.4256	10.9469	1.03929
423.4/13.4 (37059)	423.361	13.44	6.27249	8.819e-07	28.3322	2.59387	28.7478	0	3.28663	6.9374	25.7383	10.9228	1.03833
286.0/2.5 (18174)	286.024	2.49	3.24363	0.00305	25.3635	2.32349	13.3066	0	33.0829	7.90674	23.04	10.9161	1.03807
499.2/3.4 (47724)	499.238	3.39	3.62704	0.00113	10.4731	0.962149	13.0879	0	9.44122	3.62446	9.5109	10.8851	1.03683
540.3/13.7 (53081)	540.286	13.71	4.77241	5.167e-05	106.974	9.89337	144.561	0	67.452	29.2098	97.0803	10.8127	1.03393
352.1/3.8 (26987)	352.09	3.8	3.16952	0.00368	52.8777	4.90192	7.32465	0	79.7043	13.3239	47.9758	10.7871	1.03291
381.2/10.0 (31155)	381.152	9.97	4.74082	5.6327e-05	49.0217	4.57806	61.3273	0	23.4171	14.6068	44.4436	10.708	1.02971
461.3/3.5 (42523)	461.273	3.52	3.75194	0.00081	6.78658	0.635306	5.98668	0	7.21984	1.9509	6.15127	10.6824	1.02867
388.9/1.9 (32258)	388.9	1.91	3.17789	0.0036	14.9364	1.40437	19.3473	0	13.2917	6.25564	13.5321	10.6357	1.02676
214.2/10.2 (12120)	214.181	10.21	3.46666	0.00172	42.4964	3.99721	36.6999	0	45.6713	14.0771	38.4992	10.6315	1.02659
507.3/13.3 (48827)	507.291	13.25	8.1081	7.9201e-09	27.1303	2.55561	26.4693	0	5.37213	4.94882	24.5747	10.616	1.02596
396.0/9.1 (33204)	396.023	9.1	3.48972	0.00162	6.73923	0.644958	7.03473	0	6.59645	2.34958	6.09428	10.4491	1.01908
133.1/3.8 (7305)	133.051	3.81	2.7842	0.00951	5.3294	0.510879	7.44015	0	4.64852	2.6546	4.81852	10.4318	1.01836
718.3/4.1 (69829)	718.342	4.07	2.78116	0.00958	5.23133	0.501706	7.1811	0	4.57915	2.60694	4.72963	10.4271	1.01816
356.2/3.4 (27725)	356.182	3.41	3.5447	0.0014	20.2939	1.97094	9.27348	0	27.5125	4.41211	18.3229	10.2965	1.01269
532.2/3.5 (52122)	532.153	3.52	5.77322	3.3746e-06	23.3048	2.28471	24.7274	0	3.085	6.14931	21.0201	10.2003	1.00861
314.2/4.2 (20935)	314.172	4.21	3.47981	0.00166	48.5742	4.79728	63.3599	0	40.5828	18.2617	43.7769	10.1254	1.00541
216.0/9.1 (12245)	215.979	9.14	4.28204	0.0002	10.8245	1.07129	13.911	0	9.65844	2.81229	9.75316	10.1041	1.0045
647.3/4.2 (64422)	647.277	4.2	3.55162	0.00138	18.1652	1.79896	16.1619	0	19.2452	5.76654	16.3662	10.0976	1.00422
438.9/1.2 (39266)	438.872	1.18	3.31205	0.00256	56.5031	5.61115	83.0984	0	48.9612	22.4081	50.892	10.0698	1.00302
256.1/1.1 (15369)	256.088	1.1	4.44099	0.00013	29.7503	2.97659	42.7889	0	25.8299	7.37302	26.7737	9.99476	0.999772
720.3/12.6 (69984)	720.347	12.65	3.55408	0.00137	9.58513	0.962258	8.7632	0	10.0214	3.0644	8.62288	9.96109	0.998307
674.9/2.3 (66722)	674.918	2.26	3.23464	0.00312	13.9145	1.39703	13.7006	0	14.0227	5.33091	12.5175	9.96008	0.998263
450.2/7.6 (40905)	450.229	7.55	4.04925	0.00037	168.203	16.892	189.516	0	158.624	46.0936	151.311	9.95756	0.998153
772.6/6.0 (73054)	772.592	6.04	4.14533	0.00028	13.753	1.38342	16.4434	0	7.37513	4.65903	12.3696	9.94134	0.997445
323.3/14.9 (22084)	323.258	14.91	3.91801	0.00052	35.9677	3.63729	38.5891	0	6.69552	13.9478	32.3305	9.88862	0.995136
537.4/13.4 (52753)	537.397	13.39	4.6803	6.6451e-05	105.549	10.683	108.817	0	92.3997	23.1915	94.8657	9.8801	0.994761
617.3/12.1 (61784)	617.318	12.14	3.06148	0.00482	66.1005	6.69175	48.4278	0	76.4838	25.3958	59.4087	9.8779	0.994665
490.1/2.5 (46462)	490.115	2.53	4.85907	4.0771e-05	70.2794	7.13192	60.9358	0	31.1667	20.4049	63.1475	9.85421	0.993622
437.1/3.5 (39014)	437.134	3.51	3.418	0.00195	66.0864	6.74427	66.5825	0	65.8398	23.3024	59.3421	9.7989	0.991177
703.3/1.1 (68817)	703.331	1.11	2.80117	0.00913	49.642	5.10504	57.8814	0	46.0782	23.9106	44.537	9.72412	0.98785
646.3/12.9 (64353)	646.301	12.93	3.47659	0.00168	25.5288	2.63924	26.9564	0	24.8457	8.86321	22.8895	9.67275	0.98555
460.8/1.2 (42436)	460.849	1.2	3.37326	0.00219	118.298	12.2509	160.223	0	103.887	45.2056	106.047	9.65628	0.98481
622.3/4.3 (62312)	622.303	4.34	2.83856	0.00834	54.6491	5.67674	81.6256	0	47.3288	26.3281	48.9724	9.62685	0.983484
307.1/8.7 (20170)	307.11	8.73	4.79941	4.7994e-05	38.2458	3.97651	57.2546	0	33.122	7.991	34.2692	9.61793	0.983082
455.2/2.8 (41605)	455.222	2.84	2.97732	0.00594	53.6017	5.60086	0	0	92.8409	9.63046	48.0009	9.57027	0.980924
581.3/12.2 (57984)	581.296	12.22	4.13859	0.00029	19.0099	1.9872	22.0232	0	17.6967	5.01023	17.0227	9.56615	0.980737
310.1/1.1 (20509)	310.131	1.14	4.7062	6.1914e-05	303.097	32.3027	312.274	0	24.1013	97.889	270.795	9.38303	0.972343
455.9/2.2 (41688)	455.939	2.16	2.7783	0.00965	15.3244	1.65955	2.68193	0	24.2571	5.00771	13.6648	9.23402	0.965391
174.1/1.0 (9674)	174.08	1.02	3.2669	0.00287	52.4682	5.69246	70.0536	0	46.2545	20.7731	46.7757	9.21713	0.964596
782.4/14.4 (73547)	782.403	14.41	4.39631	0.00014	48.1237	5.25816	44.9898	0	7.09532	16.5094	42.8655	9.15218	0.961525
404.2/1.1 (34379)	404.195	1.12	3.28904	0.00272	500.863	54.8145	745.361	0	433.801	197.49	446.049	9.13743	0.960824
252.0/3.4 (15031)	252.037	3.36	3.02182	0.00532	90.8116	9.94291	100.391	0	86.4211	38.832	80.8687	9.1333	0.960628
664.4/6.2 (65944)	664.356	6.16	5.01723	2.6457e-05	25.1577	2.75564	17.7851	0	14.3339	6.4934	22.402	9.12953	0.960449
518.3/4.4 (50369)	518.316	4.4	2.98003	0.0059	89.6873	9.83056	122.848	0	78.5452	40.1675	79.8567	9.12331	0.960153
554.3/12.6 (54852)	554.264	12.55	3.83705	0.00065	33.2722	3.65032	39.687	0	26.5625	10.9095	29.6219	9.11486	0.95975
227.2/10.1 (13021)	227.164	10.13	3.91567	0.00053	8.98406	0.990079	11.3621	0	8.06249	2.66807	7.99398	9.07408	0.957803
203.0/3.4 (11385)	202.999	3.4	2.91532	0.00692	3.17268	0.349841	0.633593	0	4.95666	0.914468	2.82284	9.06891	0.957555
425.1/2.5 (37267)	425.118	2.48	3.23856	0.00309	30.3664	3.35986	41.1246	0	26.6678	12.1448	27.0065	9.03799	0.956072
480.2/1.1 (45013)	480.23	1.12	3.70814	0.00091	209.478	23.5192	291.675	0	182.808	68.8611	185.958	8.90667	0.949716
695.2/1.1 (68234)	695.246	1.11	3.29284	0.00269	42.1141	4.78847	39.635	0	43.4067	15.1221	37.3256	8.79488	0.94423
520.1/3.6 (50539)	520.138	3.61	4.53809	9.7947e-05	49.2554	5.61278	48.6696	0	4.99459	16.3402	43.6426	8.77557	0.943275
628.4/4.0 (62872)	628.364	3.99	3.25311	0.00298	8.73518	1.00878	9.52826	0	8.36688	3.31923	7.7264	8.65914	0.937475
728.4/3.9 (70515)	728.393	3.87	4.01433	0.0004	139.885	16.1853	109.992	0	69.569	48.8738	123.699	8.64269	0.936649
271.0/2.9 (16679)	270.979	2.9	2.88048	0.00753	13.4319	1.55486	13.5661	0	13.3654	5.97449	11.8771	8.63867	0.936447
507.9/2.2 (48891)	507.902	2.16	3.31726	0.00253	66.4152	7.70164	86.4432	0	59.008	25.3585	58.7136	8.62352	0.935685
339.2/12.7 (24750)	339.212	12.7	3.4252	0.00191	6.36944	0.738674	8.59308	0	5.5992	2.33375	5.63077	8.6228	0.935648
282.2/6.9 (17819)	282.183	6.88	5.00487	2.7367e-05	89.6144	10.4327	86.6719	0	9.47894	26.8494	79.1817	8.58975	0.933981
390.7/4.4 (32503)	390.665	4.43	2.84449	0.00822	63.7807	7.44386	84.8483	0	56.286	29.9478	56.3368	8.56823	0.932891
712.3/1.1 (69437)	712.328	1.12	3.04364	0.00504	127.238	14.8818	179.476	0	110.778	54.9401	112.357	8.54994	0.931963
711.4/4.8 (69402)	711.406	4.76	5.01176	2.6856e-05	404.265	47.4009	402.262	0	75.5996	119.595	356.864	8.52864	0.93088
720.4/6.6 (69996)	720.393	6.56	4.55546	9.3418e-05	82.9046	9.72541	87.6342	0	60.6649	21.6159	73.1792	8.52454	0.930671
520.1/3.8 (50541)	520.144	3.8	3.42456	0.00192	26.7153	3.1359	31.6792	0	9.02049	11.4712	23.5794	8.51918	0.930398
421.1/2.8 (36685)	421.141	2.8	2.85194	0.00807	76.3085	9.08408	105.337	0	66.7122	35.6821	67.2244	8.40025	0.924292
792.7/7.8 (74111)	792.658	7.81	4.0897	0.00033	21.2373	2.53489	13.6851	0	17.264	6.15479	18.7024	8.37801	0.923141
402.1/3.1 (34074)	402.15	3.13	3.91402	0.00053	29.6122	3.53518	34.3152	0	12.0459	10.8585	26.077	8.37644	0.923059
443.9/5.9 (40014)	443.85	5.94	4.79105	4.9102e-05	14.0801	1.68196	13.1895	0	4.77738	4.20902	12.3981	8.37123	0.922789
333.1/3.5 (23552)	333.094	3.5	2.89134	0.00734	2.24544	0.268383	1.94014	0	1.12836	1.1232	1.97706	8.36656	0.922547
279.1/2.4 (17425)	279.1	2.44	3.80646	0.0007	164.677	19.7984	233.817	0	143.224	51.3258	144.879	8.31773	0.920005
520.2/3.5 (50577)	520.249	3.45	3.51038	0.00153	29.7651	3.60311	21.3072	0	34.7742	8.27553	26.162	8.26093	0.917029
460.3/3.8 (42383)	460.28	3.76	3.25084	0.00299	72.876	8.84566	38.868	0	94.5824	20.974	64.0304	8.23862	0.915855
482.8/1.2 (45426)	482.825	1.18	3.16854	0.00369	48.7951	5.92763	59.1206	0	44.5392	19.4837	42.8674	8.23179	0.915495
538.4/7.7 (52873)	538.365	7.67	3.17293	0.00365	164.935	20.2467	37.6055	0	220.713	47.9491	144.688	8.14625	0.910958
282.1/10.1 (17801)	282.144	10.13	2.89726	0.00723	15.3371	1.88866	18.3755	0	14.0662	6.88691	13.4484	8.12061	0.909588
478.3/1.1 (44753)	478.255	1.13	2.95255	0.00631	152.239	18.7689	214.566	0	132.562	67.75	133.47	8.11122	0.909086
227.1/3.6 (13010)	227.138	3.63	2.78929	0.00939	38.7205	4.77513	38.4094	0	6.83199	20.6654	33.9454	8.10879	0.908956
302.2/4.0 (19720)	302.171	4.03	2.92545	0.00675	2.18874	0.26995	2.67489	0	1.9907	0.972653	1.91879	8.10794	0.908911
493.0/9.6 (46874)	493.014	9.6	2.83099	0.0085	35.9334	4.44507	11.4133	0	52.6643	12.0986	31.4883	8.08387	0.907619
214.1/4.4 (12099)	214.086	4.37	4.56174	9.1832e-05	61.8662	7.71858	63.8655	0	4.11341	20.2084	54.1476	8.01523	0.903916
622.2/12.4 (62285)	622.246	12.43	3.90047	0.00055	37.5647	4.714	29.0123	0	22.3082	12.9605	32.8507	7.96876	0.901391
529.3/13.2 (51802)	529.28	13.18	5.28379	1.2771e-05	33.2817	4.18514	26.4062	0	16.4562	8.20627	29.0966	7.95236	0.900496
410.2/4.8 (35176)	410.194	4.77	3.46545	0.00172	108.349	13.6437	151.815	0	94.4421	38.542	94.7053	7.94131	0.899892
338.2/1.1 (24517)	338.158	1.12	3.41144	0.00198	115.276	14.5286	171.353	0	99.8445	42.0611	100.748	7.93444	0.899516
657.2/13.0 (65224)	657.211	13.04	3.23411	0.00312	7.67616	0.968082	9.07403	0	7.08147	2.94141	6.70808	7.92924	0.899232
417.3/4.0 (36286)	417.269	3.97	3.1972	0.00343	112.41	14.1784	144.545	0	100.281	44.3987	98.2315	7.92826	0.899178
353.1/4.8 (27196)	353.115	4.79	2.8604	0.00791	41.0827	5.18213	51.5893	0	36.9667	18.786	35.9005	7.92775	0.89915
341.0/4.6 (24951)	341.044	4.59	3.59778	0.00122	9.05717	1.15112	9.32742	0	3.89962	3.58765	7.90605	7.86816	0.895873
202.1/4.1 (11314)	202.085	4.15	3.64983	0.00107	8.00479	1.01872	8.9735	0	5.46476	2.89063	6.98607	7.85773	0.895297
485.6/3.6 (45872)	485.617	3.59	5.0635	2.3313e-05	100.905	12.9408	93.437	0	25.7877	28.7466	87.9642	7.79745	0.891953
350.2/2.9 (26631)	350.166	2.86	2.85151	0.00808	6.77509	0.883133	6.2263	0	7.06549	2.92816	5.89196	7.67166	0.884889
593.3/5.6 (59263)	593.338	5.63	3.04145	0.00507	31.2292	4.07428	35.3313	0	14.0931	14.7142	27.155	7.66498	0.884511
424.2/3.5 (37186)	424.212	3.46	5.19007	1.6496e-05	49.5785	6.52511	56.094	0	13.0174	13.6767	43.0534	7.5981	0.880705
391.1/6.7 (32539)	391.069	6.74	3.44138	0.00184	25.8537	3.40327	31.1727	0	23.6472	8.98508	22.4504	7.59671	0.880626
448.2/5.0 (40613)	448.154	5	3.46043	0.00175	122.654	16.1581	99.9929	0	77.4454	47.8807	106.496	7.59086	0.880291
472.3/5.7 (44031)	472.312	5.68	3.77605	0.00076	87.0839	11.5249	111.338	0	55.0774	30.5106	75.559	7.55616	0.878301
617.2/12.4 (61740)	617.249	12.41	3.82824	0.00066	52.396	6.96378	35.6823	0	29.6373	18.4921	45.4323	7.52408	0.876453
745.4/5.7 (71517)	745.4	5.71	3.01851	0.00537	126.99	16.9242	144.051	0	119.377	52.6292	110.066	7.50347	0.875262
646.4/4.0 (64384)	646.379	4.03	3.0489	0.00498	151.323	20.1818	213.134	0	131.78	63.5899	131.142	7.49802	0.874947
432.9/13.5 (38441)	432.888	13.48	3.1462	0.0039	105.947	14.1339	157.022	0	91.7725	42.7591	91.8131	7.49595	0.874827
577.3/3.6 (57551)	577.317	3.6	3.84644	0.00063	147.78	19.9124	149.42	0	20.3159	56.4054	127.868	7.42152	0.870493
534.3/1.1 (52374)	534.274	1.13	3.18478	0.00354	218.525	29.6958	326.056	0	189.256	86.4096	188.829	7.35879	0.866806
452.2/1.1 (41175)	452.212	1.13	4.24031	0.00022	182.915	25.0281	189.704	0	13.4392	63.3829	157.887	7.30837	0.863821
221.9/2.1 (12660)	221.946	2.11	3.21301	0.00329	7.02457	0.961424	7.68991	0	6.71667	2.62374	6.06315	7.30643	0.863705
278.1/4.0 (17309)	278.104	4.03	4.75852	5.3668e-05	24.9944	3.42363	25.3269	0	1.98923	7.71007	21.5707	7.30055	0.863355
336.2/3.8 (24120)	336.19	3.75	3.00331	0.00557	92.3605	12.7441	119.538	0	82.2128	39.0319	79.6164	7.24731	0.860177
773.4/4.4 (73100)	773.43	4.39	3.04047	0.00508	58.6432	8.12573	12.8372	0	84.0707	16.0939	50.5174	7.21697	0.858355
260.2/5.1 (15739)	260.197	5.06	3.70088	0.00093	132.955	18.4392	90.0595	0	90.3466	46.4341	114.516	7.21047	0.857964
648.3/8.4 (64503)	648.307	8.4	4.31302	0.00018	19.4892	2.72135	21.4198	0	9.98763	6.02287	16.7679	7.1616	0.85501
586.3/6.3 (58508)	586.325	6.27	3.33362	0.00242	8.92012	1.24875	10.3849	0	8.2854	3.18077	7.67136	7.14321	0.853894
523.2/1.1 (50924)	523.174	1.12	2.96117	0.00618	33.3418	4.69325	40.5466	0	30.387	14.1822	28.6486	7.10422	0.851516
651.2/13.2 (64733)	651.234	13.24	3.14061	0.00396	47.8605	6.74573	54.5672	0	44.8845	18.5299	41.1148	7.09493	0.850948
559.3/12.2 (55513)	559.316	12.19	4.05117	0.00037	91.048	12.9162	81.8732	0	48.2347	30.0428	78.1318	7.04914	0.848136
357.0/2.2 (27815)	357.022	2.19	2.85714	0.00797	33.2396	4.72583	44.0623	0	24.977	15.5438	28.5138	7.0336	0.847178
535.3/12.0 (52503)	535.315	12.03	3.38056	0.00215	62.3699	8.95666	30.7222	0	58.9162	21.4215	53.4133	6.96353	0.842829
749.1/8.7 (71736)	749.073	8.69	2.79714	0.00922	172.411	24.9911	166.517	0	103.678	85.1457	147.42	6.89888	0.838779
[truncated: 236 more rows]

## Sheet: Beauveria live muscle p<0.01
Sheet 4: Ion peaks significantly higher (p<0.01) in B. bassiana grown on live ant muscle tissue. Yellow markings indicate beauverolides
[truncated: 1,350 more rows]

[truncated: 8 more sheets: Metarhizium live brain p<0.01, Metarhizium live muscle p<0.01, Beauveria dead ions p<0.01, Metarhizium dead ions p<0.01, Beauveria dead brain p<0.01, Beauveria dead muscle p<0.01, Metarhizium dead brain p<0.01, Metarhizium dead muscle p<0.01]
